## **Genome wide meta-analysis identifies genomic relationships, novel loci, and pleiotropic mechanisms across eight psychiatric disorders.**

Cross-Disorder Group of the Psychiatric Genomics Consortium\*

\* Author lists are provided at the end of the manuscript

### **Correspondence to:**

Phil H. Lee, PhD  
Psychiatric and Neurodevelopmental  
Genetics Unit  
Center for Genomic Medicine,  
Massachusetts General Hospital  
185 Cambridge St.  
Boston, MA 02114  
[plee0@mgh.harvard.edu](mailto:plee0@mgh.harvard.edu)

Jordan W. Smoller, MD, ScD  
Psychiatric and Neurodevelopmental  
Genetics Unit  
Center for Genomic Medicine,  
Massachusetts General Hospital  
185 Cambridge St.  
Boston, MA 02114  
[jsmoller@mgh.harvard.edu](mailto:jsmoller@mgh.harvard.edu)

## Summary

Genetic influences on psychiatric disorders transcend diagnostic boundaries, suggesting substantial pleiotropy of contributing loci. However, the nature and mechanisms of these pleiotropic effects remain unclear. We performed a meta-analysis of 232,964 cases and 494,162 controls from genome-wide studies of anorexia nervosa, attention-deficit/hyperactivity disorder, autism spectrum disorder, bipolar disorder, major depression, obsessive-compulsive disorder, schizophrenia, and Tourette syndrome. Genetic correlation analyses revealed a meaningful structure within the eight disorders identifying three groups of inter-related disorders. We detected 109 loci associated with at least two psychiatric disorders, including 23 loci with pleiotropic effects on four or more disorders and 11 loci with antagonistic effects on multiple disorders. The pleiotropic loci are located within genes that show heightened expression in the brain throughout the lifespan, beginning in the second trimester prenatally, and play prominent roles in a suite of neurodevelopmental processes. These findings have important implications for psychiatric nosology, drug development, and risk prediction.

## Keywords

Psychiatric genetics, cross-disorder genetics, psychiatric disorders, pleiotropy, neurodevelopment, GWAS, genetic correlation, gene expression

## INTRODUCTION

Psychiatric disorders affect more than 25% of the population in any given year and are a leading cause of worldwide disability (Global Burden of Disease Injury Incidence Prevalence Collaborators, 2017; Kessler and Wang, 2008). The substantial influence of genetic variation on risk for a broad range of psychiatric disorders has been established by both twin and, more recently, large-scale genomic studies (Smoller et al., 2018). Psychiatric disorders are highly polygenic, with a large proportion of heritability contributed by common variation. Many risk loci have emerged from genome-wide association studies (GWAS) of, among others, schizophrenia (SCZ), bipolar disorder (BIP), major depression (MD), and attention-deficit/hyperactivity disorder (ADHD) from the Psychiatric Genomics Consortium (PGC) and other efforts (Sullivan et al., 2018). These studies have revealed a surprising degree of genetic overlap among psychiatric disorders (Brainstorm Consortium, 2018; Cross-Disorder Group of the Psychiatric Genomics Consortium, 2013). Elucidating the extent and biological significance of cross-disorder genetic influences has implications for psychiatric nosology, drug development, and risk prediction. In addition, characterizing the functional genomics of cross-phenotype genetic effects may reveal fundamental properties of pleiotropic loci that differentiate them from disorder-specific loci, and help identify targets for diagnostics and therapeutics.

In 2013, analyses by the PGC's Cross-Disorder Group identified loci with pleiotropic effects across five disorders: autism spectrum disorder (ASD), ADHD, SCZ, BIP, and MD in a sample comprising 33,332 cases and 27,888 controls (Cross-Disorder Group of the Psychiatric Genomics Consortium, 2013). In the current study, we examined pleiotropic effects in a greatly expanded dataset, encompassing 232,964 cases and 494,162 controls, that included three additional psychiatric disorders: Tourette syndrome (TS), obsessive-compulsive disorder (OCD), and anorexia nervosa (AN). We address four major questions regarding the shared genetic basis of these eight disorders: 1) Can we identify a shared etiologic structure within the broad range of these clinically distinct psychiatric disorders? 2) Can we detect additional loci associated with risk for multiple disorders (pleiotropic loci)? 3) Do some of these risk loci have opposite allelic effects across disorders? and 4) Can we identify functional features of the pleiotropic loci that could account for their broad effects on psychopathology?

## RESULTS

We analyzed genome-wide single nucleotide polymorphism (SNP) data for eight neuropsychiatric disorders using a combined sample of 232,964 cases and 494,162 controls (**Table 1; Supplementary Table 1**). The eight disorders included AN (Duncan et al., 2017), ASD (Grove et al., 2017), ADHD (Demontis et al., 2019), BIP (Stahl et al.,

2018), MD (Wray et al., 2018), OCD (International Obsessive Compulsive Disorder Foundation Genetics Collaborative (IOCDF-GC) and OCD Collaborative Genetics Association Studies (OC GAS), 2018), TS (Yu et al., In press.), and SCZ (Schizophrenia Working Group of the Psychiatric Genomics, 2014). All study participants were of self-identified European ancestry, which was supported by principal component analysis of genome-wide data.

**Table 1. Summary of eight neuropsychiatric disorder datasets**

| Disorder     | #Cases         | #Controls      | Total Samples  | # of GWAS Loci | Population Prevalence (k) | Liability-based SNP heritability (SE) | References                               |
|--------------|----------------|----------------|----------------|----------------|---------------------------|---------------------------------------|------------------------------------------|
| <b>ADHD</b>  | 19,099         | 34,194         | 53,293         | 9              | 0.05                      | 0.222 (0.014)                         | Demontis et al. 2019                     |
| <b>AN</b>    | 3,495          | 10,983         | 14,478         | 0              | 0.01                      | 0.195 (0.029)                         | Duncan et al. 2017                       |
| <b>ASD</b>   | 18,381         | 27,969         | 46,350         | 5              | 0.01                      | 0.113 (0.010)                         | Grove et al. 2017                        |
| <b>BIP</b>   | 20,352         | 31,358         | 51,710         | 17             | 0.01                      | 0.182 (0.011)                         | Stahl et al. 2018                        |
| <b>MD</b>    | 130,664        | 330,470        | 461,134        | 44             | 0.15                      | 0.085 (0.004)                         | Wray et al. 2018                         |
| <b>OCD</b>   | 2,688          | 7,037          | 9,725          | 0              | 0.025                     | 0.280 (0.041)                         | IOCDF-GC and OCGAS 2018                  |
| <b>SCZ</b>   | 33,640         | 43,456         | 77,096         | 108            | 0.01                      | 0.222 (0.012)                         | Schizophrenia Working Group of PGC. 2014 |
| <b>TS</b>    | 4,645          | 8,695          | 13,340         | 0              | 0.008                     | 0.200 (0.026)                         | Yu et al. 2018                           |
| <b>Total</b> | <b>232,964</b> | <b>494,162</b> | <b>727,126</b> |                |                           |                                       |                                          |

The number of cases and controls used in the meta-analysis of the present study. The numbers may differ from those reported in the original publications because our study included only European ancestry subjects to avoid potential confounding due to ancestral heterogeneity across distinct disorder studies. SNP heritability was estimated from the GWAS summary statistics using LD score regression.

***Genetic correlations among eight neuropsychiatric disorders indicate three genetic factors.***

After standardized and uniform quality control, additive logistic regression analyses were performed on individual disorders (Methods). A total of 6,786,994 SNPs were common across all datasets and were retained for further study. Using the summary statistics of these SNPs, we first estimated pairwise genetic correlations among the eight disorders using linkage disequilibrium (LD) score regression analyses (Bulik-

Sullivan et al., 2015a) (Methods; **Fig. 1a; Supplementary Table 2**). The results were broadly concordant with previous estimates (Brainstorm Consortium, 2018; Cross-Disorder Group of the Psychiatric Genomics Consortium, 2013). The genetic correlation was highest between SCZ and BIP ( $r_g = 0.70 \pm 0.02$ ), followed by OCD and AN ( $r_g = 0.50 \pm 0.12$ ). Interestingly, based on genome-wide genetic correlations, MD was closely correlated with ASD ( $r_g = 0.45 \pm 0.04$ ) and ADHD ( $r_g = 0.44 \pm 0.03$ ), two childhood-onset disorders. Despite variation in magnitude, significant genetic correlations were apparent for most pairs of disorders, suggesting a complex, higher-order genetic structure underlying psychopathology (**Fig. 1b**).

We modeled the genome-wide joint architecture of the eight neuropsychiatric disorders using an exploratory factor analysis (EFA) (Gorsuch, 1988), followed by genomic structural equation modeling (SEM) (Grotzinger et al., 2018) (Methods). EFA identified three correlated factors, which together explained 51% of the genetic variation in the eight neuropsychiatric disorders (**Supplementary Table 3**). The first factor consisted primarily of disorders characterized by compulsive behaviors, specifically AN, OCD, and, more weakly, TS. The second factor was characterized by mood and psychotic disorders (MD, BIP, and SCZ), and the third factor by three early-onset neurodevelopmental disorders (ASD, ADHD, TS) as well as MD. Similar to our EFA results, hierarchical clustering analyses also identified three sub-groups among the eight disorders (**Supplementary Fig. 1**).

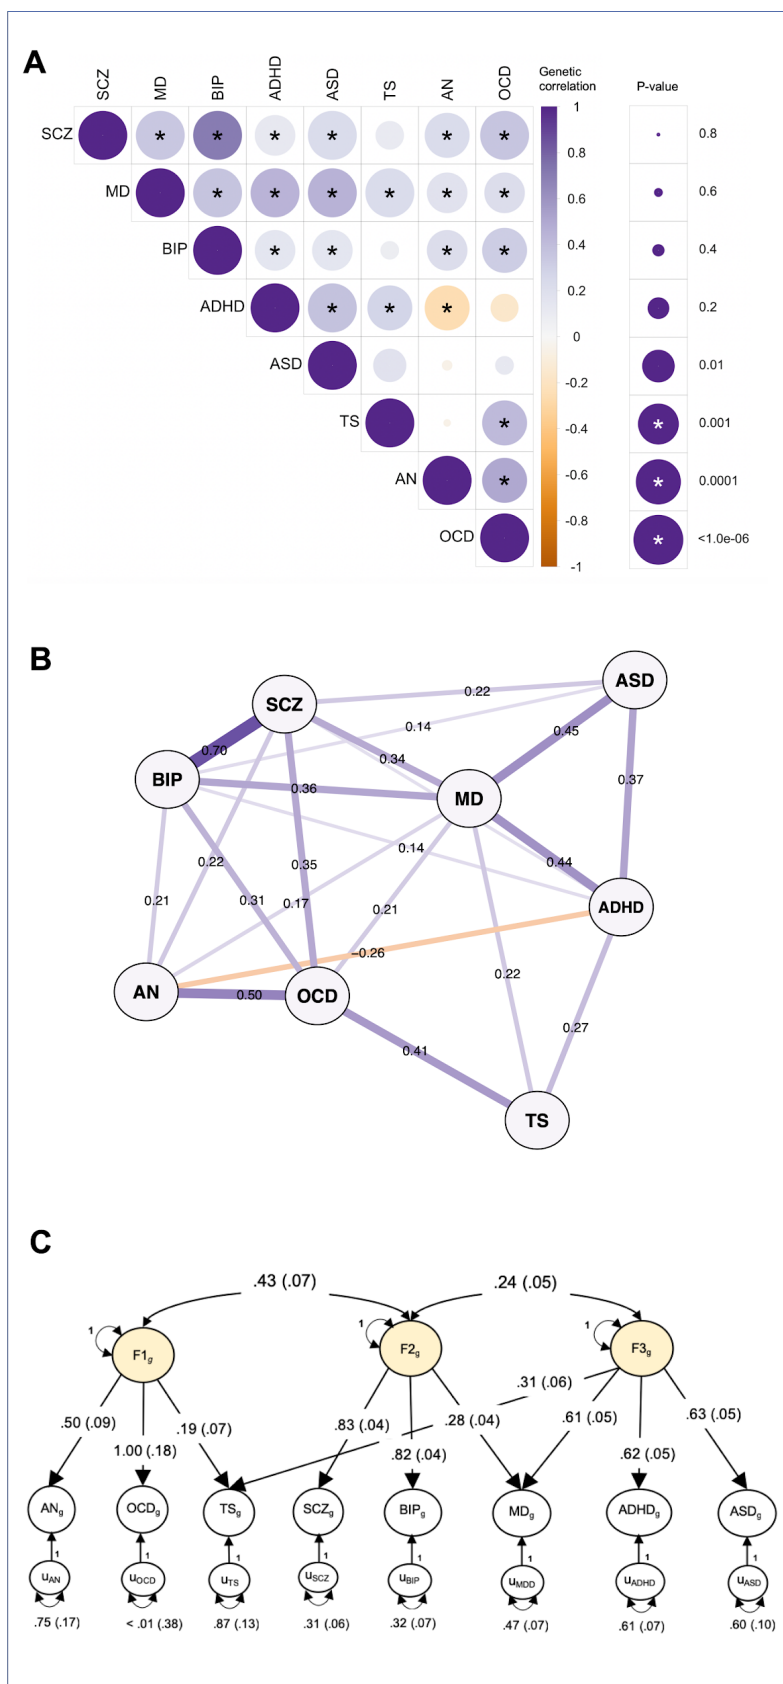

**Figure 1. Genetic relationships between eight psychiatric disorders.** A) SNP-based genetic correlations ( $r_g$ ) were estimated between eight neuropsychiatric disorders using LDSC. The size of the circles scales with the significance of the p-values. The darker the color, the larger the magnitude of  $r_g$ .

Star sign (\*) indicates statistical significance after Bonferroni correction. (B) SNP-based genetic correlations between eight disorders were depicted using an in-directed graph to reveal complex genetic relationships. Only significant genetic correlations after Bonferroni correction in (A) were displayed. Each node represents a disorder, with edges indicating the strength of the pairwise correlations. The width of the edges increases, while the length decreases, with the absolute values of  $r_g$ . (C) Based on results of an exploratory factor analysis of the genetic correlation matrix, a confirmatory factor model with three correlated genetic factors was specified using Genomic SEM and estimated with the weighted least squares algorithm. Two-headed arrows connecting the three factors to one another represent their correlations. Two-headed arrows connecting the genetic components of the individual psychiatric disorders to themselves represent residual genetic variances and correspond to the proportion of heritable variation in liability to each individual psychiatric disorder that is unexplained by the three factors. Standardized parameters are depicted with their standard errors in parentheses. Paths labeled 1 with no standard errors reported are fixed parameters, which are used for scaling.

### ***Cross-disorder meta-analysis identifies 109 pleiotropic loci***

The factor structure described above is based on average effects across the genome, but does not address more fine-grained cross-disorder effects at the level of genomic regions or individual loci. To identify genetic loci with shared risk, we performed a meta-analysis of the eight neuropsychiatric disorders using a fixed-effects-based method (Bhattacharjee et al., 2012) that accounts for the differences in sample sizes, existence of subset-specific effects, and overlapping subjects across datasets (Methods). There was no evidence of genomic inflation ( $\lambda_{1000} = 1.005$ ; **Fig. 2a**). Using the primary fixed-effects-based meta-analysis, we identified 136 LD-independent regions with genome-wide significant association ( $P_{\text{meta}} \leq 5 \times 10^{-8}$ ). Due to the known extensive LD at the major histocompatibility complex (MHC) region (chromosome 6 region at 25-35 Mb), we considered the multiple signals present there as one locus. 101 of the 136 (74.3%) significantly associated regions overlapped with previously reported genome-wide significant regions from at least one individual disorder, while 35 loci (25.7%) represented novel genome-wide significant associations.

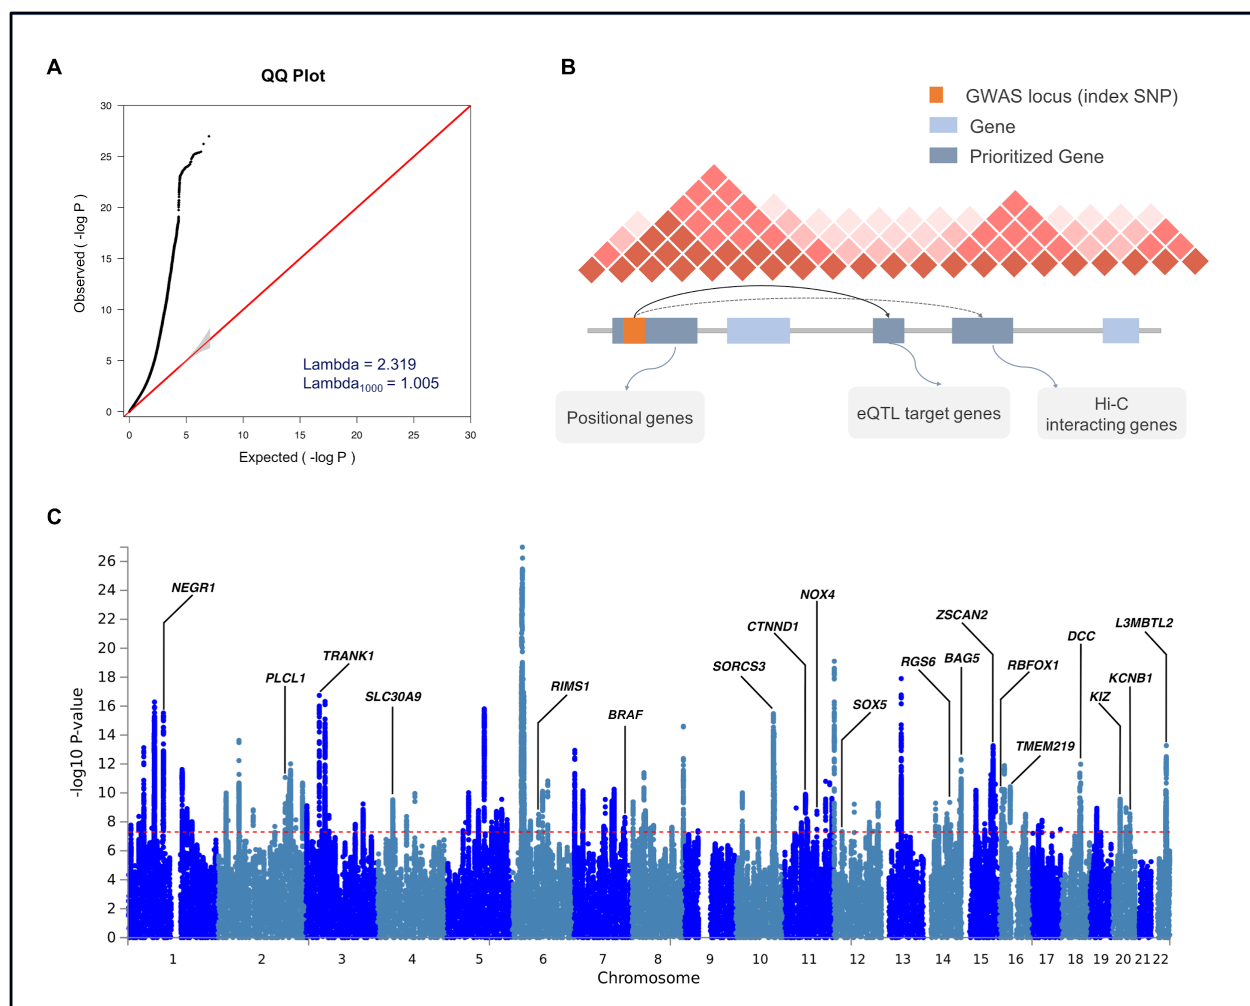

**Figure 2. Results of cross-disorder meta-analysis and candidate gene mapping.** (A) Quantile-quantile (QQ) plot displaying the observed meta-analysis statistics vs. the expected statistics under the null model of no associations in the  $-\log_{10}(p\text{-value})$  scale. Although a marked departure is notable between the two statistics, the estimated  $\lambda_{1000}$  and the estimated LD Score regression intercept indicate that the observed inflation is mainly due to polygenic signals rather than major confounding factors including population stratification. (B) Gene prioritization strategies for significantly associated loci. Candidate genes were mapped on each locus if the index SNP and credible SNPs reside within a protein-coding gene, are eQTL markers of the gene in the brain tissue, or interact with promoter regions of the gene based on brain Hi-C data. (C) Manhattan plot displaying the cross-disorder meta-analysis results highlighting candidate genes mapped to top pleiotropic regions.

Within these 136 loci, multi-SNP-based conditional analysis (Yang et al., 2012) identified 10 additional SNPs with independent associations, resulting in a total of 146 independent lead SNPs (**Supplementary Table 4**). To provide a quantitative estimate of the best fit configuration of cross-disorder genotype-phenotype relationships, we estimated the posterior probability of association (referred to as the *m-value*) with each disorder using a Bayesian statistical framework (Han and Eskin, 2012) (Methods; **Supplementary Table 5**). As recommended, an *m-value* threshold of 0.9 was used to predict with high confidence that a particular SNP was associated with a given disorder. Also, *m-values* of  $< 0.1$  were taken as strong evidence against association. Plots of the



SNP  $p$ -value vs.  $m$ -value for all 146 lead SNPs are shown in **Supplementary Fig. 2**. Nearly 75% ( $N = 109/146$ ) of the genome-wide significant SNPs were pleiotropic (i.e., associated with more than one disorder). As expected, configurations of disease association reflected the differences in the statistical power and genetic correlations between the samples (**Supplementary Fig. 3**). Of the 109 pleiotropic loci, 83% and 72% involved SCZ and BIP, respectively. MD, which had the largest case-control sample, was associated with 48% of the pleiotropic loci ( $N=52/109$ ). Despite the relatively small sample size, ASD was implicated in 36% of the pleiotropic loci. Most of the ASD associations co-occurred with SCZ and BIP. The other disorders, ADHD, TS, OCD, and AN featured associations in 16%, 14%, 11%, and 7% of the pleiotropic loci, respectively. Of the single-disorder-specific loci, 81% and 16% were associated with SCZ and MD, respectively.

**Table 2** summarizes 23 pleiotropic loci associated with at least four of the disorders. Among these loci, heterogeneity of effect sizes was minimal ( $p$ -value of  $Q > 0.1$ ). Eleven of the 23 regions map to the intron of a protein-coding gene, and seven additional lead SNPs had at least one protein-coding gene within 100 kb. We used an array of functional genomics resources, including brain eQTL and Hi-C data (Wang et al., 2018; Won et al., 2016) to prioritize potential candidate genes to the identified regions (Methods; **Fig. 2b**). The Manhattan plot in **Fig. 2c** highlights the prioritized candidate genes.

**Table 2. Summary of 23 loci with the broadest cross-disorder association**

| SNP         | CHR | BP        | Candidate Gene (evidence)                        | ADHD  | ANO   | ASD   | BIP   | MD    | OCD   | SCZ   | TS    | m |
|-------------|-----|-----------|--------------------------------------------------|-------|-------|-------|-------|-------|-------|-------|-------|---|
| rs8084351   | 18  | 50726559  | DCC(g,q)                                         | 0.961 | 0.905 | 0.97  | 0.965 | 1     | 0.951 | 1     | 0.984 | 8 |
| rs7193263   | 16  | 6315880   | RBFOX1(g)                                        | 0.924 | 0.802 | 0.984 | 0.995 | 1     | 0.902 | 0.901 | 0.932 | 7 |
| rs12658451  | 5   | 103904037 | -                                                | 0.963 | 0.165 | 0.999 | 0.972 | 1     | 0.574 | 1     | 0.963 | 6 |
| rs34215985  | 4   | 42047778  | SLC30A9(g;q)                                     | 0.908 | 0.926 | 0.992 | 0.843 | 1     | 0.88  | 0.929 | 0.913 | 6 |
| rs61867293  | 10  | 106563924 | SORCS3(g)                                        | 0.987 | 0.954 | 0.992 | 0.985 | 1     | 0.854 | 1     | 0.886 | 6 |
| rs9360557   | 6   | 73132745  | KCNQ5(ha;hf)<br>KCNQ5-IT1(hf)                    | 0.905 | 0.938 | 0.976 | 0.984 | 0.993 | 0.897 | 1     | 0.892 | 6 |
| rs10149470  | 14  | 104017953 | -                                                | 0.844 | 0.833 | 0.998 | 0.979 | 1     | 0.868 | 0.997 | 0.97  | 5 |
| rs11570190  | 11  | 57560452  | CTNND1(g)<br>OR5AK2(q)                           | 0.927 | 0.79  | 0.97  | 0.58  | 1     | 0.916 | 1     | 0.832 | 5 |
| rs117956829 | 11  | 89339666  | TRIM64B(ha)<br>GRM5(hf)<br>TRIM77(hf)<br>TYR(hf) | 0.723 | 0.929 | 0.972 | 0.906 | 1     | 0.66  | 0.997 | 0.789 | 5 |
| rs1484144   | 4   | 80217597  | -                                                | 0.97  | 0.884 | 0.973 | 0.98  | 1     | 0.84  | 0.998 | 0.85  | 5 |
| rs6969410   | 7   | 110069015 | -                                                | 0.836 | 0.827 | 0.987 | 0.93  | 0.999 | 0.917 | 1     | 0.729 | 5 |
| rs7531118   | 1   | 72837239  | -                                                | 0.74  | 0.949 | 0.963 | 0.785 | 1     | 0.858 | 0.973 | 0.921 | 5 |
| rs9787523   | 10  | 106460460 | SORCS3(g)                                        | 0.944 | 0.855 | 0.972 | 0.877 | 1     | 0.853 | 0.999 | 0.963 | 5 |
| rs10265001  | 7   | 140665521 | -                                                | 0.716 | 0.772 | 0.986 | 0.999 | 0.783 | 0.921 | 0.988 | 0.692 | 4 |
| rs11688767  | 2   | 57988194  | BCL11A(h)                                        | 0.845 | 0.899 | 0.929 | 0.983 | 1     | 0.849 | 1     | 0.698 | 4 |
| rs12129573  | 1   | 73768366  | -                                                | 0.929 | 0.835 | 0.894 | 0.948 | 1     | 0.85  | 1     | 0.539 | 4 |

|            |    |           |                        |       |       |       |       |       |       |       |       |   |
|------------|----|-----------|------------------------|-------|-------|-------|-------|-------|-------|-------|-------|---|
| rs1518367  | 2  | 198807015 | PLCL1(g)<br>SF3B1(q)   | 0.897 | 0.783 | 0.913 | 0.991 | 1     | 0.674 | 1     | 0.865 | 4 |
| rs2332700  | 14 | 72417326  | RGS6(g)                | 0.755 | 0.884 | 0.951 | 0.948 | 0.999 | 0.885 | 1     | 0.817 | 4 |
| rs5758265  | 22 | 41617897  | L3MBTL2(g)<br>CHADL(g) | 0.735 | 0.885 | 0.89  | 0.885 | 1     | 0.913 | 1     | 0.978 | 4 |
| rs6125656  | 20 | 48090779  | KCNB1(g)               | 0.768 | 0.885 | 0.986 | 0.995 | 0.985 | 0.731 | 0.999 | 0.707 | 4 |
| rs7405404  | 16 | 13749859  | -                      | 0.763 | 0.765 | 0.99  | 0.939 | 1     | 0.726 | 1     | 0.562 | 4 |
| rs78337797 | 12 | 23987925  | SOX5(g)                | 0.849 | 0.797 | 0.97  | 0.954 | 1     | 0.831 | 0.996 | 0.885 | 4 |
| rs79879286 | 7  | 24826589  | -                      | 0.865 | 0.854 | 0.966 | 0.999 | 1     | 0.734 | 0.999 | 0.798 | 4 |

SNP ID, location, prioritized candidate gene, disorder-specific m-values for 23 most pleiotropic loci.

The number of disorders with high confidence association (m-values  $\geq 0.9$ ) is shown in the last column. Evidence for candidate gene mapping include: g (genic SNP); q (brain cis-eQTLs); h (hi-C interacting gene based on FUMA); hf (hi-C-based interaction between associated SNP and target gene in the fetal brain from Won et al. 2016); ha (hi-C-based interaction in the adult brain from Wang et al. 2018); and tss (transcription start sites).

Of the 109 risk loci with shared effects, the 18q21.2 region surrounding SNP rs8084351 at the netrin 1 receptor gene *DCC* featured the most pleiotropic association ( $P_{\text{meta}} = 4.26 \times 10^{-12}$ ; **Fig. 3a**). This region showed association with all eight psychiatric disorders, and has been previously associated with both MD and neuroticism (Turley et al., 2018; Wray et al., 2018). The product of *DCC* plays a key role in guiding axonal growth during neurodevelopment and serves as a master regulator of midline crossing and white matter projections (Bendriem and Ross, 2017). Gene expression data indicate that *DCC* expression peaks during early prenatal development (**Supplementary Fig. 4a**).

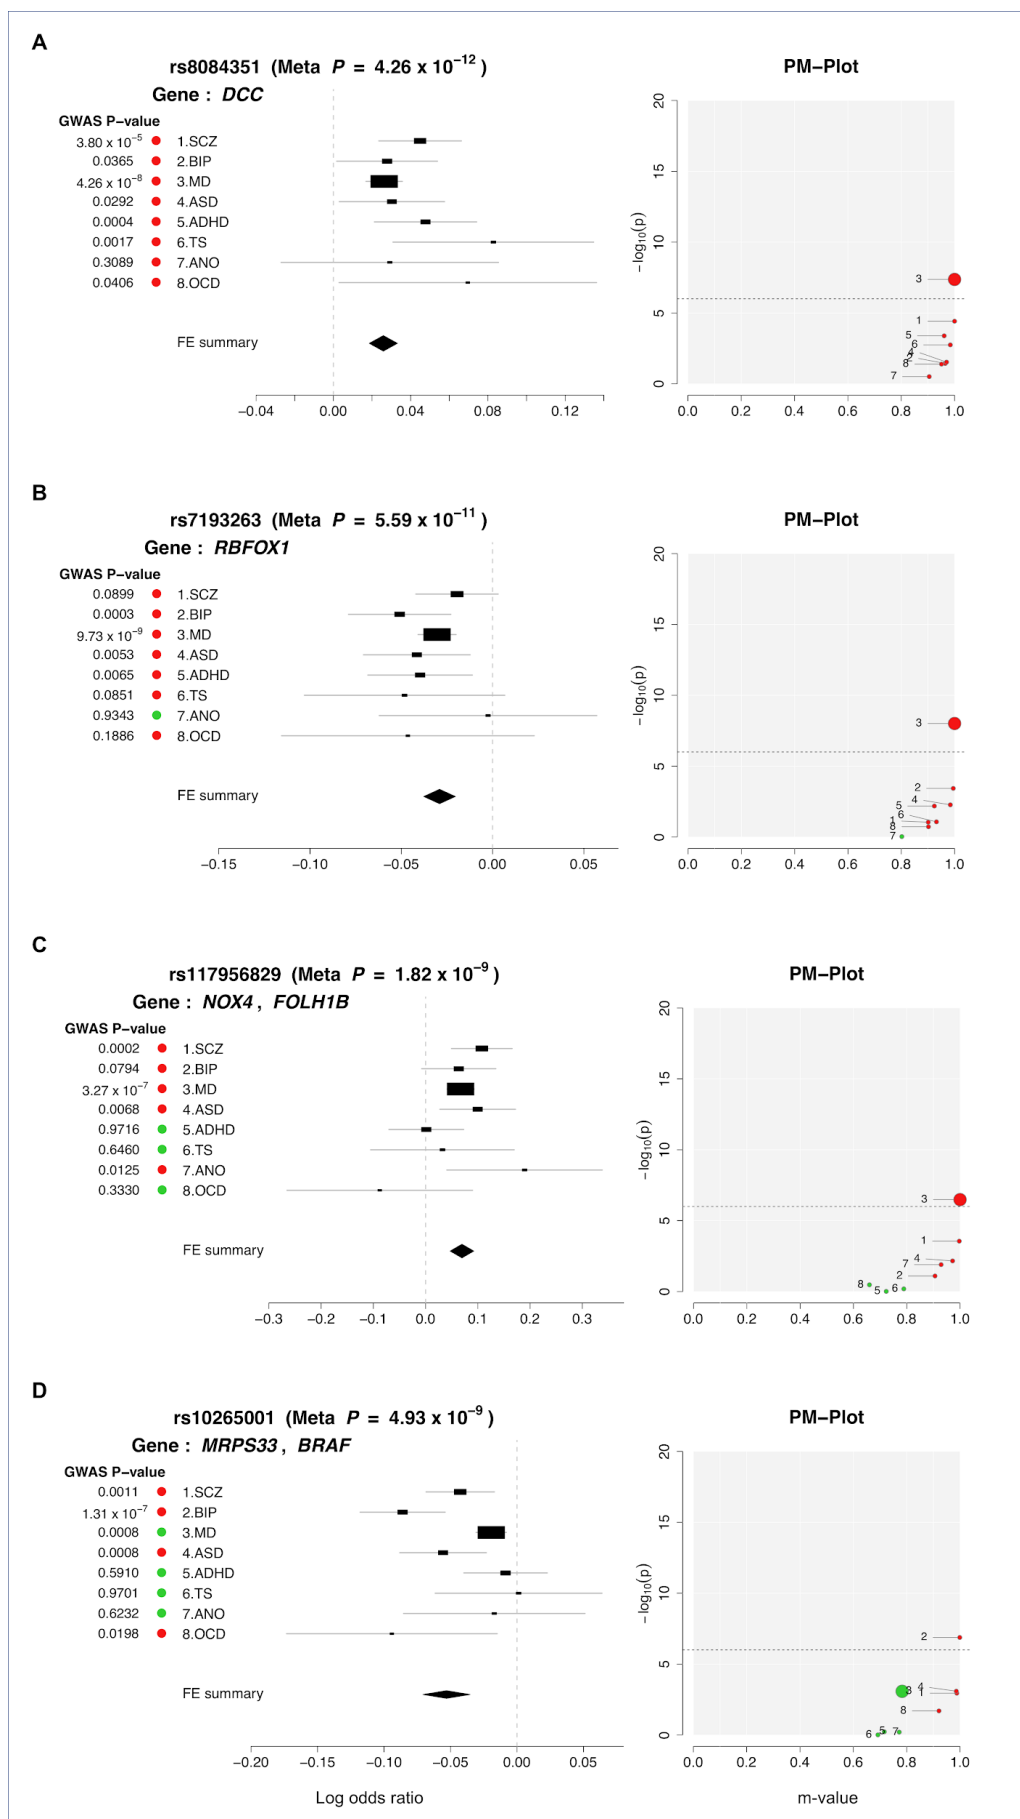

**Figure 3. Profile of disorder associations for illustrative pleiotropic loci: (A) rs8084351 on 18q21.2; (B) rs7193263 on 16p13.3; (C) rs117956829 on 11q14.3; and (D) rs10265001 on 7q34.** For each locus, disorder-specific effects of the index SNP are shown using ForestPMPlot. The first panel is the forest plot, displaying disorder-specific association p-value, log odds ratios (ORs), and standard errors of the SNP. The meta-analysis p-value and the corresponding summary statistic are displayed on the top and the bottom of the forest plot, respectively. The second panel is the PM-plot in which X-axis represents the m-value, the posterior probability that the effect exists in each disorder, and the Y-axis represents the disorder-specific association p-value as  $-\log_{10}(p\text{-value})$ . Disorders are depicted as a dot whose size represents the sample size of individual GWAS. Disorders with estimated m-values of at least 0.9 are colored in red, while those with m-values less than 0.9 are marked in green.

The second most pleiotropic locus in our analysis was identified in an intron of *RBFOX1* (RNA Binding Fox-1 Homolog 1) on 16p13.3 (lead SNP rs7193263;  $P_{\text{meta}} = 5.59 \times 10^{-11}$ ). The lead SNP showed association with all of the disorders except AN (**Fig. 3b**). *RBFOX1* (also called *A2BP1*) encodes a splicing regulator mainly expressed in neurons and known to target several genes important to neuronal development, including *NMDA* receptor 1 and voltage-gated calcium channels (Hamada et al., 2015). Knock-down and silencing of *RBFOX1* during mouse corticogenesis impairs neuronal migration and synapse formation (Hamada et al., 2015; Hamada et al., 2016), implying its pivotal role in early cortical maturation. In contrast to *DCC*, however, developmental gene-expression of *RBFOX1* showed gradually increasing gene expression throughout the prenatal period (**Supplementary Fig. 4b**). Animal models and association studies have implicated *RBFOX1* in aggressive behaviors, a trait observed in several of the disorders in our analysis (Fernandez-Castillo et al., 2017).

Of the 109 pleiotropic loci, 76 were identified in the GWAS of individual disorders, while the remaining 33 are novel. The most pleiotropic among these novel loci was a region downstream of *NOX4* (NADPH Oxidase 4) that was associated with SCZ, BIP, MD, ASD, and AN (rs117956829;  $P_{\text{meta}} = 1.82 \times 10^{-9}$ ; **Fig. 3c**). Brain Hi-C data (Wang et al., 2018; Won et al., 2016) detected a direct interaction of the cross-disorder association region with *NOX4* in both adult and fetal brain (interaction  $p=3.2 \times 10^{-16}$  and  $9.324 \times 10^{-6}$ , respectively). As a member of the family of *NOX* genes that encode subunits of *NADPH* oxidase, *NOX4* is a major source of superoxide production in human brain and a promoter of neural stem cell growth (Kuroda et al., 2014; Topchiy et al., 2013).

**Figure 3d** illustrates another novel psychiatric risk locus associated with SCZ, BIP, ASD, and OCD ( $P_{\text{meta}} = 3.58 \times 10^{-8}$ ). The lead SNP rs10265001 resides between *MRPS33* (Mitochondrial Ribosomal Protein S33) and *BRAF* (B-Raf Proto-Oncogene, Serine/Threonine Kinase) on 7q34. The brain Hi-C data indicated interaction of the associated region with the promoters of two nearby genes: *BRAF*, which contributes to the MAP kinase signal transduction pathway and plays a role in postsynaptic responses of hippocampal neurons (Grantyn and Grantyn, 1973), and *KDM7A* (encoding Lysine Demethylase 7A), which plays a central role in the nervous system and midbrain development (Horton et al., 2010; Qi et al., 2010; Tsukada et al., 2010).

Our prior cross-disorder meta-analysis of five psychiatric disorders (Cross-Disorder Group of the Psychiatric Genomics Consortium, 2013) found no evidence of SNPs with antagonistic effects on two or more disorders. Here, we examined whether any variants with meta-analysis  $p \leq 1 \times 10^{-6}$  had opposite directional effects between disorders (Methods). After adjusting for having examined 206 loci across eight disorders ( $q < 0.001$ ), we identified 11 loci with evidence of opposite directional effects on two or more disorders (**Fig. 4; Supplementary Table. 6**). The disorder configuration of opposite directional effects varied for the 11 loci, including three loci with opposite directional effects on SCZ and MD (rs301805, rs1933802, rs3806843), two loci between SCZ and ASD (rs9329221, rs2921036), and one locus (rs75595651) with opposite directional effects on the two mood disorders, BIP and MD. Notably, all of the six loci involving SCZ and BIP exhibited the same directional effect on the two disorders ( $P_{binom} < 0.05$ ), in line with their strong genome-wide genetic correlation.

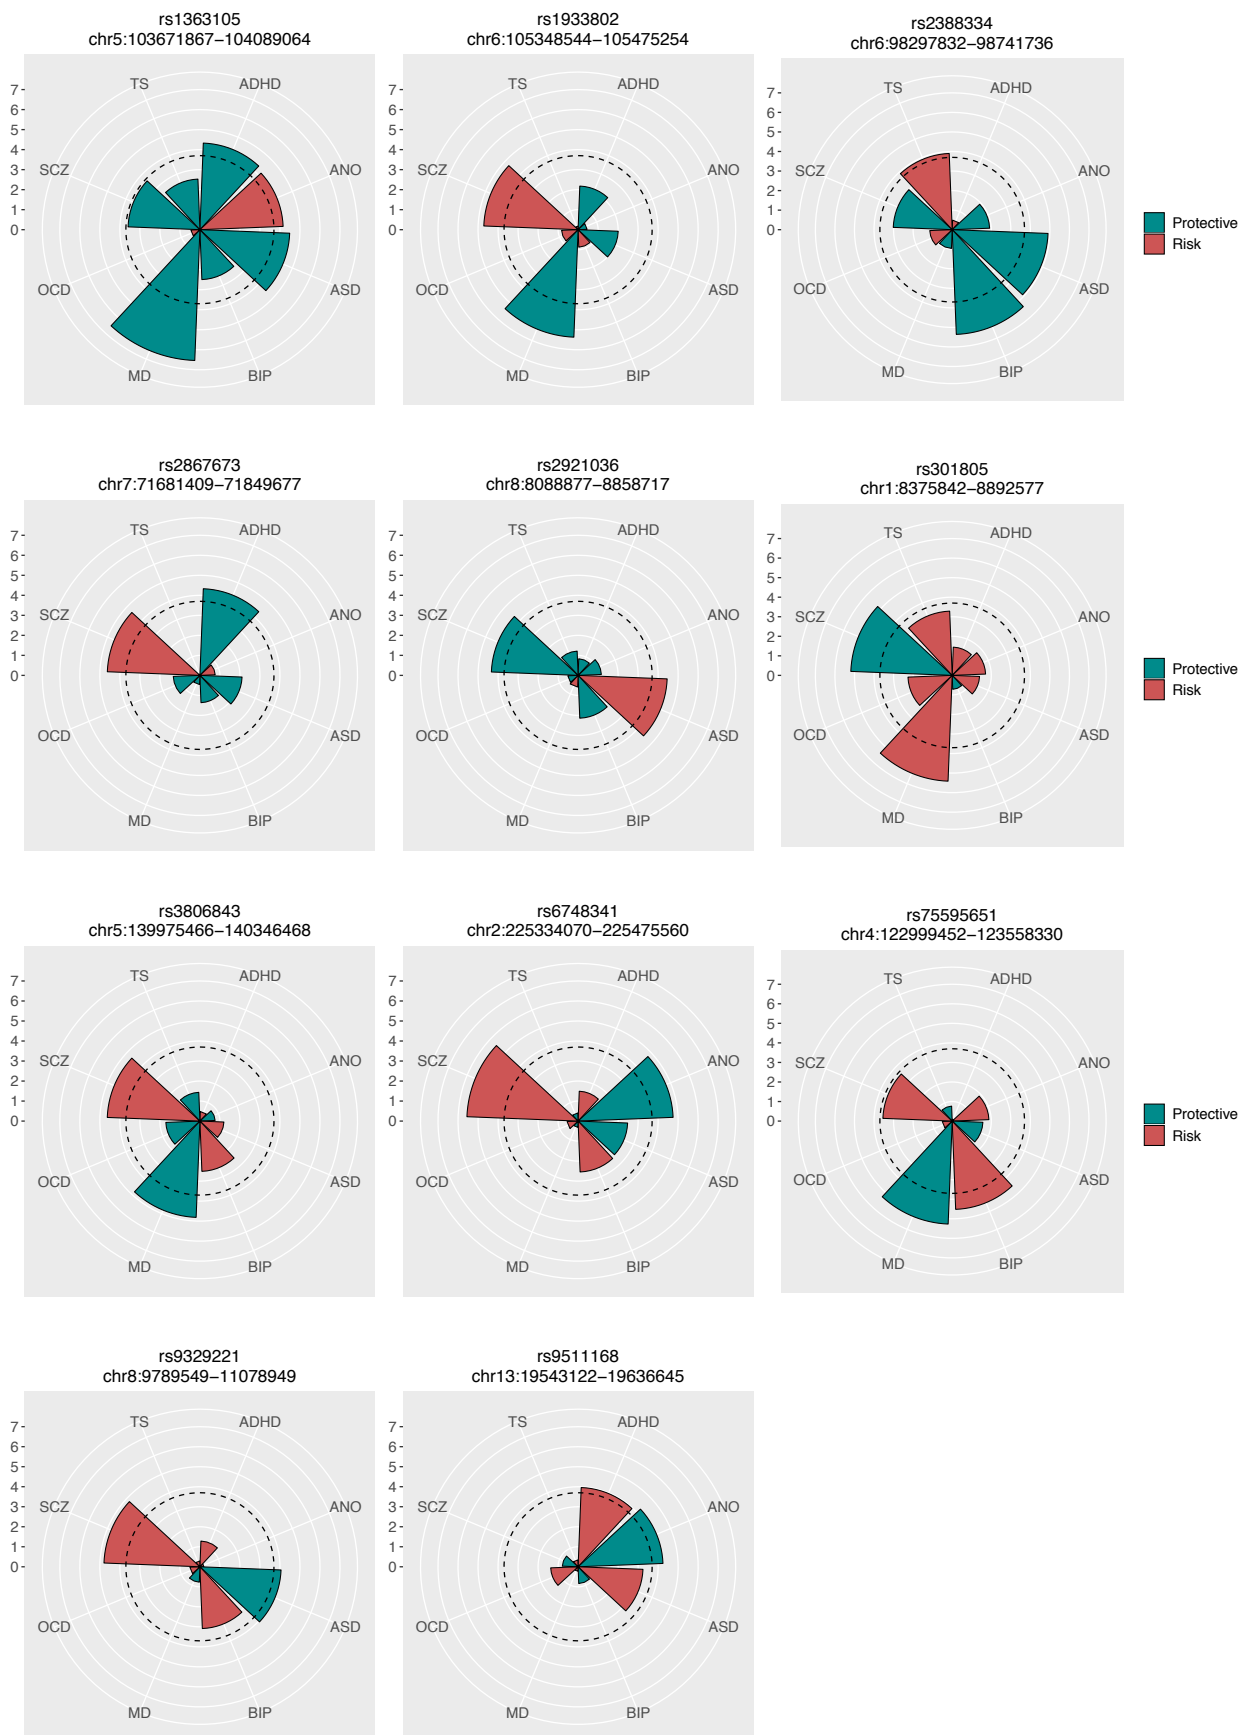

**Figure 4. Eleven loci with opposite directional effects.** The radius of each wedge corresponds to the absolute values of the Z-scores ( $\log(\text{Odds ratios})/\text{S.E}$ ) obtained from association tests of the SNP for eight disorders. The color indicates whether the examined SNP carries risk (red) or protective effects (green) for each disorder. The dotted line around the center indicates statistically significant SNP effects that account for multiple testing of 206 SNPs with the q-value of 0.001.

### ***Functional characterization of pleiotropic risk loci***

We conducted a series of bioinformatic analyses that examined whether loci with shared risk effects on multiple neuropsychiatric disorders had characteristic features that distinguished them from non-pleiotropic risk loci. First, we annotated the functional characteristics of 146 lead SNPs using various public data sources (Methods; **Supplementary Table 7-9**). Overall, they showed significant enrichment of genes expressed in the brain ( $\beta=0.123$ ,  $\text{SE}=0.0109$ , enrichment  $p = 1.22 \times 10^{-29}$ ) and pituitary ( $\beta=0.0916$ ,  $\text{SE}=0.0136$ ,  $p = 8.74 \times 10^{-12}$ ), but not in the other Genotype-Tissue Expression (GTEx) tissues. (**Supplementary Table 10; Fig. 5a**). A separate analysis of 109 pleiotropic risk loci also showed specific enrichment of genes expressed in multiple brain tissues ( $p = 1.55 \times 10^{-5}$ ; **Supplementary Table 11**), while disorder-specific loci showed nominally enriched brain gene expression in the cortex ( $p = 2.14 \times 10^{-2}$ ; **Supplementary Table 12**).

Gene-set enrichment analyses using Gene Ontology data suggested involvement of pleiotropic risk loci in neurodevelopmental processes (**Supplementary Table 13,14**). The 109 pleiotropic risk loci were enriched for genes involved in neurogenesis (gene-set enrichment  $p = 9.67 \times 10^{-6}$ ), regulation of nervous system development ( $p = 3.41 \times 10^{-5}$ ), and neuron differentiation ( $p = 3.30 \times 10^{-5}$ ), while enrichment of these gene-sets was not seen for disorder-specific risk loci (adjusted enrichment  $p > 0.05$ ). Pleiotropic risk loci also showed enrichment of genes involved in specific neurotransmitter-related pathways -- glutamate receptor signaling ( $p = 2.45 \times 10^{-6}$ ) and voltage-gated calcium channel complex ( $p = 5.72 \times 10^{-4}$ ) -- while non-pleiotropic risk loci, which were predominantly SCZ-associated, were over-represented among acetylcholine receptor genes ( $p = 7.25 \times 10^{-8}$ ). Analysis of cortical gene expression data also suggested enrichment of pleiotropic risk genes in cortical glutamatergic neurons through layers 2-6 (**Supplementary Table 15**), further supporting the shared role of glutamate receptor signaling in the pathogenesis of diverse neuropsychiatric disorders.



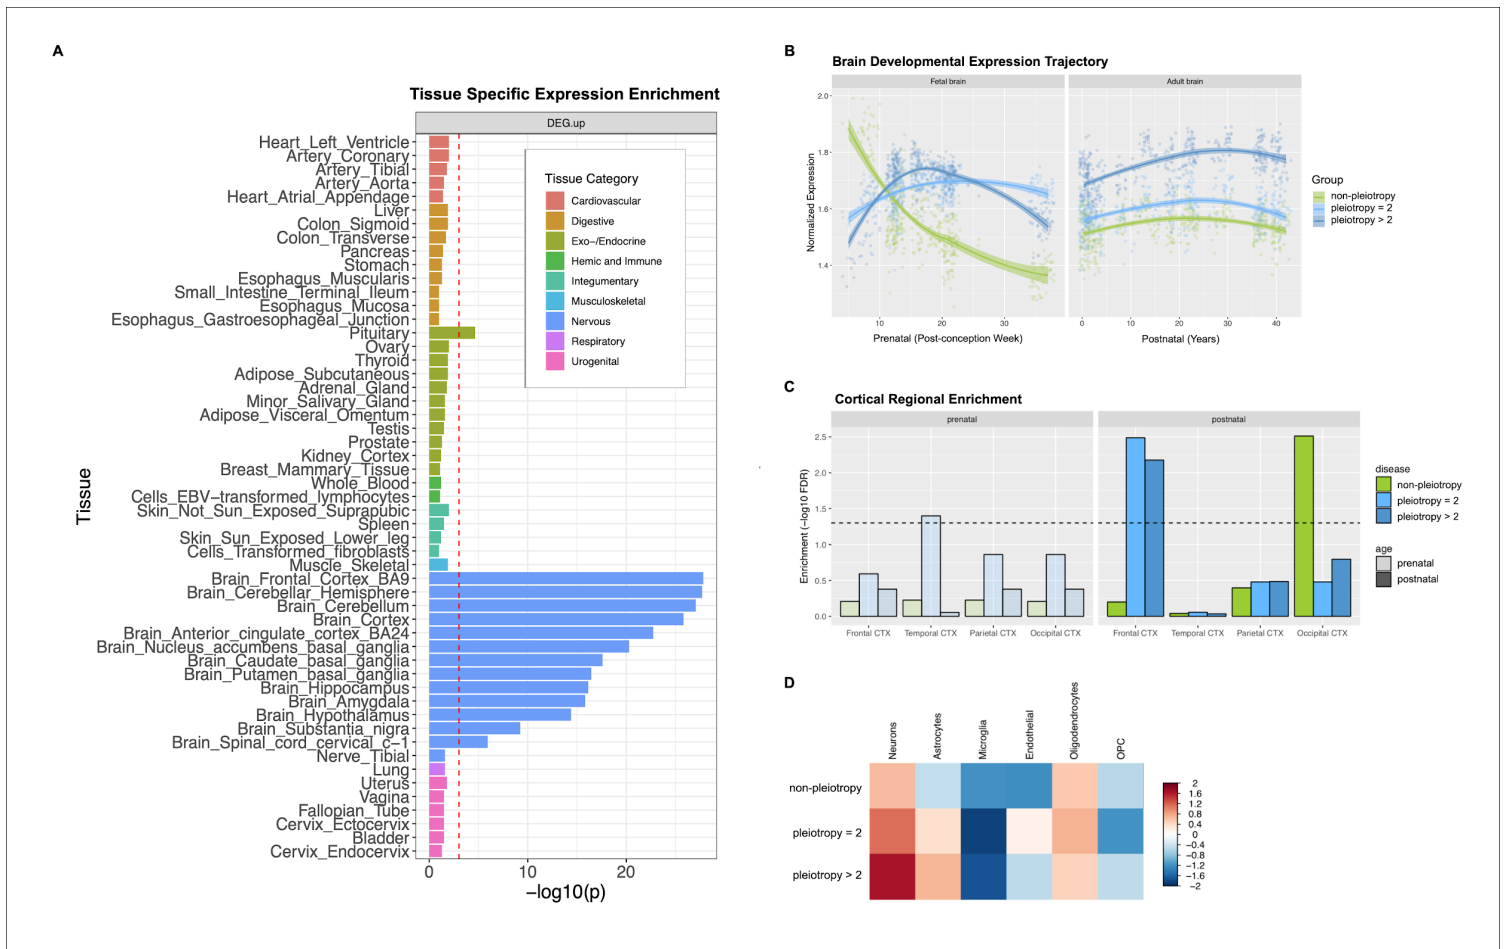

**Figure 5. Results of functional genomics data analysis for pleiotropic vs. disorder-specific loci.** (A) GTEx tissue-specific enrichment results for 146 risk loci associated with at least one of eight neuropsychiatric disorders. GTEx tissues were classified as 9 distinct categories, of which the brain tissues were colored in blue. The dotted red line indicates a statistically significant p-value after conducting Bonferroni correction for multiple testing. Psychiatric disorder-associated loci show significant enrichment in genes expressed in pituitary and all brain tissues except nerve\_tibal. (B) Brain developmental expression trajectory displayed for the three groups of genes based on Kang et al. The 146 genome-wide significant loci from the cross-disorder meta analysis were clustered into three groups based on predicted disorder-specific associations: (1) no-pleiotropy; (2) pleiotropy=2; and (3) pleiotropy>2. The “no-pleiotropy” group included 37 loci that showed a single-disorder-specific association, while the “pleiotropy=2” and “pleiotropy>2” groups included 60 and 49 loci that were associated with two and more than two disorders, respectively. (C) In the adult cortex, genes mapped to pleiotropic loci were enriched for frontal cortex specific genes, while genes mapped to non-pleiotropic loci are enriched for occipital cortex specific genes. (D) Genes mapped to 146 risk loci show higher expression values in neurons and oligodendrocytes, with much higher neuronal specificity for pleiotropic loci.

In contrast to the differences in neuronal development and neuronal signaling pathways, pleiotropic and non-pleiotropic risk loci shared several characteristics related to genomic function. For instance, gene-set enrichment analyses indicated that both pleiotropic and non-pleiotropic risk loci were enriched for genes involved in the regulation of synaptic plasticity, neurotransmission, and synaptic cellular components. More than 41% of the genes associated with our genome-wide significant loci, both pleiotropic and non-



pleiotropic, were intolerant of loss of function mutations (pLI score  $\geq 0.9$ ); this is highly unlikely to occur by chance (Fisher's exact  $p=4.90 \times 10^{-8}$ ). This finding was consistent when examining pleiotropic ( $p=2.85 \times 10^{-11}$ ) and non-pleiotropic risk loci ( $p=1.56 \times 10^{-3}$ ) separately.

Next, we compared spatio-temporal gene-expression patterns for the 109 pleiotropic risk loci and the 37 disorder-specific loci using post-mortem brain data. On average, disorder-specific and pleiotropic risk loci showed a similar level of gene expression in both prenatal and postnatal development after multiple testing correction (t-test  $p > 0.025 \times 10^{-2}$ ; **Supplementary Fig. 5**). During prenatal development, non-pleiotropic loci (mainly SCZ-associated) showed peak expression in the first trimester, after which expression rapidly decreased, while pleiotropic genes associated with only 2 disorders ("*pleiotropy*=2"; 60 loci) and those associated with more than 2 ("*pleiotropy*>2", 49 loci) showed peak expression around the second trimester (**Fig. 5b**). After birth, all three groups showed gradually increasing gene expression until adulthood. Expression levels were associated with the degree of pleiotropy, with the *pleiotropy*>2 group showing higher gene expression than either the *pleiotropy*=2 group (t-test  $p < 2.10 \times 10^{-4}$ ) or non-pleiotropic risk loci (t-test  $p < 2.2 \times 10^{-16}$ ).

Enrichment analyses using the genes preferentially expressed in specific cortical regions suggested that pleiotropic loci were over-represented among genes expressed in the frontal cortex, while non-pleiotropic loci were enriched in the occipital cortex (FDR  $q < 0.05$ ; **Fig. 5c**). Cell-type-specific analysis indicated that genes implicated in pleiotropic loci were mainly expressed in neurons (FDR  $q < 0.05$ ) but not in glial cell types. Further, enrichment of pleiotropic loci in neuronal cells was also associated with the degree of pleiotropy, as highlighted in **Fig. 5d**.

Previous studies of model organisms using gene knock-out experiments suggested that pleiotropic risk loci may undergo stronger selection than non-pleiotropic loci (Hill and Zhang, 2012). However, we found no evidence that pleiotropic risk variants are under stronger evolutionary constraints (**Supplementary Table 16**). Various comparative genomics resources, including PhyloP (Pollard et al., 2010), PhastCons (Siepel et al., 2005), and GERP++ (Davydov et al., 2010), showed our top loci to have similar properties regardless of the extent of pleiotropy. Neither did we find differences between disorder-specific lead SNPs and pleiotropic SNPs with respect to their minor allele frequencies, average heterozygosity, or predicted allele ages (Kiezun et al., 2013). Pleiotropic and non-pleiotropic SNPs also did not differ in terms of the distance to nearest genes, distance to splicing sites, chromosome compositions, and predicted functional consequences of non-coding regulatory elements.

### ***Relationship between cross-disorder genetic risk and other brain-related traits and diseases***

To explore the genetic relationship of cross-disorder genetic risk with other traits, we treated this 8-disorder GWAS meta-analysis as a single “cross-disorder phenotype.” We applied LDSC to estimate SNP heritability ( $h^2_{\text{SNP}}$ ) and genetic correlations with other phenotypes, using block jackknife-based standard errors to estimate statistical significance. The estimated  $h^2_{\text{SNP}}$  of the cross-disorder phenotype was 0.146 (SE 0.0058; observed scale). Using data for 28 brain-related traits selected from LDHub (Zheng et al., 2017), we found significant genetic correlations of the cross-disorder phenotype with seven traits (at a Bonferroni-corrected p-value threshold 0.002): never/ever smoking status, years of education, neuroticism, subjective well-being, and three sleep-related phenotypes (chronotype, insomnia, and excessive daytime sleepiness) (**Supplementary Table 17**).

GWAS catalog data for the 109 pleiotropic risk loci showed enrichment of implicated genes in a range of brain-related traits (**Supplementary Table 18**). As expected, the associated traits included previous studies of neuropsychiatric disorders including SCZ, BIP, and ASD. In addition, the pleiotropic risk loci were enriched among genes previously associated with neuroticism (corrected enrichment  $p= 5.28 \times 10^{-6}$ ; *GRIK3*, *CTNND1*, *DRD2*, *RGS6*, *RBFOX1*, *ZNF804A*, *L3MBTL2*, *CHADL*, *RANGAP1*, *RSRC1*, *GRM3*), cognitive ability (corrected  $p= 7.15 \times 10^{-5}$ ; *PTPRF*, *NEGR1*, *ELOVL3*, *SORCS3*, *DCC*, *CACNA1I*), and night sleep phenotypes (corrected  $p= 1.86 \times 10^{-2}$ ; *PBX1*, *NPAS3*, *RGS6*, *GRIN2A*, *MYO18A*, *TIAF1*, *CNTN4*, *PPP2R2B*, *TENM2*, *CSMD1*). We also found significant enrichment of pleiotropic risk genes in multiple measures of body mass index (BMI), supporting previous studies suggesting a shared etiologic basis between a range of neuropsychiatric disorders and obesity (Hartwig et al., 2016; Lopresti and Drummond, 2013; Milaneschi et al., 2018)

## **DISCUSSION**

In the largest cross-disorder GWAS meta-analysis of neuropsychiatric disorders to date, comprising more than 725,000 cases and controls across eight disorders, we identified 146 LD-independent lead SNPs associated with at least one disorder, including 35 novel loci. Of these, 109 loci were found to affect two or more disorders, although characterization of this pleiotropy is partly dependent on per-disorder sample size. Our results provide four major insights into the shared genetic basis of psychiatric disorders.

First, modeling of genetic correlations among the eight disorders using two different methods (EFA and hierarchical clustering) identified three groups of disorders based on shared genomics: one comprising disorders characterized by compulsive behaviors (AN, OCD and TS), a second comprising mood and psychotic disorders (MD, BIP and

SCZ), and a third comprising two early-onset neurodevelopmental disorders (ASD and ADHD) and one disorder each from the first two factors (TS and MD). The loading of MD on two factors may reflect biological heterogeneity within MD, consistent with recent evidence showing that early-onset depression is associated with genetic risk for ADHD and with neurodevelopmental phenotypes (Rice et al., 2018). Overall, these results indicate a substantial pairwise genetic correlation between multiple disorders along with a higher-level genetic structure that point to broader domains underlying genetic risk to psychopathology. These findings are at odds with the classical, categorical classification of mental illness.

Second, variant-level analyses support the existence of substantial pleiotropy, with nearly 75% of the 146 genome-wide significant SNPs influencing more than one of the eight examined disorders. We also identified a set of 23 loci with particularly extensive pleiotropic profiles, affecting four or more disorders. The most highly pleiotropic locus in our analyses, with evidence of association with all eight disorders, maps within *DCC*, a gene fundamental to the early development of white matter connections in the brain (Bendriem and Ross, 2017). Prior studies showed that *DCC* is a master regulator of axon guidance (through its interactions with netrin-1 and draxin (Liu et al., 2018). Loss of function mutations in *DCC* cause severe neurodevelopmental syndromes involving loss of midline commissural tracts and diffuse disorganization of white matter tracts (Bendriem and Ross, 2017; Jamuar et al., 2017; Marsh et al., 2017). A highly pleiotropic effect of variation in *DCC* on diverse psychiatric disorders with childhood and adolescent onset would be consistent with its role in both early organization of neuronal circuits and the maturation of mesolimbic dopaminergic connections to the prefrontal cortex during adolescence (Hoops and Flores, 2017; Reynolds et al., 2018; Vosberg et al., 2018).

We also identified a set of loci that have opposite effects on risk of psychiatric disorders. Notably, these included loci with opposing effects on pairs of disorders that are genetically correlated and have common clinical features. For example, a SNP within *MRSA* was associated with opposing effects on two neurodevelopmental disorders (ASD and SCZ), and a variant within *KIAA1109* had opposite directional effects on major mood disorders (BIP and MD) (**Supplementary Table 6**). These results underscore the complexity of genetic relationships among related disorders and suggest that overall genetic correlations may obscure antagonistic biological mechanisms that operate at the level of component loci and pathways as seen in immune-mediated diseases (Baurecht et al., 2015; Lettre and Rioux, 2008; Schmitt et al., 2016). This heterogeneity of effects between genetically correlated disorders is also consistent with a recent analysis that revealed loci contributing to biological differences between BIP and SCZ and found polygenic risk score associations with specific symptom dimensions (Bipolar Disorder and Schizophrenia Working Group of the Psychiatric Genomics Consortium, 2018).

Third, we found extensive evidence that neurodevelopmental effects underlie the cross-disorder genetics of mental illness. In addition to *DCC*, a link between pleiotropy and genetic effects on neurodevelopment was also seen for other top loci in our analysis, including *RBFOX1*, *BRAF*, and *KDM7A*, all of which have been shown in prior research to influence aspects of nervous system development. Gene enrichment analyses showed that pleiotropic loci were distinguished from disorder-specific loci by their involvement in neurodevelopmental pathways including neurogenesis, regulation of nervous system development, and neuron differentiation. These results are consistent with those of a smaller recent analysis in the population-based Danish iPSYCH cohort (comprising 46,008 cases and 19,526 controls across six neuropsychiatric disorders) (Schork et al., 2017). In that analysis, consistent with the present findings, functional genomic characterization of cross-disorder loci implicated fetal neurodevelopmental processes, with greater prenatal than postnatal expression. However, the specific loci, cell types, and pathways implicated in the iPSYCH analysis differed from those identified in our study. Of note, however, *SORCS3* emerged as a genome-wide significant cross-disorder locus in both studies.

Fourth, our analyses of spatiotemporal gene expression profiles revealed that pleiotropic loci are enriched among genes expressed in neuronal cell types, particularly in frontal or prefrontal regions. They also demonstrated a distinctive feature of genes related to pleiotropic loci: compared with disorder-specific loci, they are on average expressed at higher levels both prenatally and postnatally (Figure 4). More specifically, single-disorder (mainly SCZ) loci were related to genes that were preferentially expressed in the first fetal trimester followed by a decline over the prenatal period and then relatively stable levels postnatally. In contrast, expression of genes related to pleiotropic loci peaked in the second trimester and remained overexpressed throughout the lifespan. When dividing the pleiotropic loci into bins of those associated with two disorders (mainly SCZ and BIP) vs. three or more disorders, we observed a consistent gradient of greater expression associated with broader pleiotropy.

Taken together, our results suggest that pleiotropic loci appear to be distinguished by both their differential importance in neurodevelopmental processes and their heightened brain expression after the first trimester. Apart from this, however, pleiotropic loci were similar to non-pleiotropic loci across a range of other functional features, including intolerance to loss-of-function mutations, evidence of selection, minor allele frequencies, and genomic position relative to functional elements.

Overall, our results identify a range of pleiotropic effects among loci associated with psychiatric disorders. Consistent with prior research (Brainstorm Consortium, 2018; Cross-Disorder Group of the Psychiatric Genomics Consortium, 2013), we found substantial pairwise genetic correlations across child- and adult-onset disorders and

extended these findings by demonstrating clusters of genetically-related disorders. These results augment a substantial body of research demonstrating that genetic influences on psychopathology do not map cleanly onto the clinical nosology instantiated in the DSM or ICD (Smoller et al., 2018). Using a range of bioinformatic and functional genomic analyses, we find that loci with pleiotropic effects are distinguished by their involvement in early neurodevelopment and increased expression beginning in the second trimester of fetal development and persisting throughout adulthood. Taken together, the analyses presented here suggest that genetic influences on psychiatric disorders comprise at least two general classes of loci. The first comprises a set of genes that confer relatively broad liability to psychiatric disorders by acting on early neurodevelopment and the establishment of brain circuitry. These pleiotropic genes begin to come online by the second trimester of fetal development and exhibit differentially high expression thereafter. Such loci may underlie a latent general psychopathology factor (the “p” factor) (Caspi et al., 2014) that has been identified in developmental studies of mental disorders, comprising transdiagnostic symptom clusters (internalizing, externalizing, and psychotic) (Caspi et al., 2014). The expression and differentiation of this generalized genetic risk into discrete psychiatric syndromes (e.g., ASD, BIP, AN) may then involve direct and/or interactive effects of additional sets of loci and environmental factors, possibly mediated by epigenetic effects, that shape phenotypic expression via effects on brain structure/function and behavior. Further research will be needed to clarify the nature of such effects.

Our results should be interpreted in light of several limitations. First, while our dataset is the largest genome-wide cross-disorder analysis to date, data available for individual disorders varied substantially—from a minimum of 9,725 cases and controls for OCD to 461,134 cases and controls for MD. This imbalance of sample size may have limited our power to detect pleiotropic effects on underrepresented disorders. Second, it is possible that comorbidity among disorders contributed to apparent pleiotropy; however we found that less than 2% of cases overlapped between disorder datasets (excluding 23andMe data) and we adjusted for overlap in meta-analysis. Third, the method we applied to detect cross-phenotype association, which combines an all-subsets fixed-effects GWAS meta-analysis with a Bayesian method for evaluating the best-fit configuration of genotype-phenotype associations, is one of several approaches (Solovieff et al., 2013). However, we have previously shown that this method outperforms a range of alternatives for detecting pleiotropy under various settings (Zhu et al., 2018). Fourth, our designation of loci as pleiotropic vs. non-pleiotropic loci refers only to their observed effects on the eight target brain disorders. Thus, some of the “non-pleiotropic” loci may have additional effects on psychiatric phenotypes that were not included in our meta-analysis and/or on non-psychiatric phenotypes. Fifth, our functional genomic analyses were constrained by the limitations of existing resources (e.g. spatiotemporal gene expression data resources). Our work underscores the need for more comprehensive functional data including single cell transcriptomic and epigenomic profiles across

development and brain tissues. Lastly, we included only individuals of European ancestry to avoid potential confounding due to ancestral heterogeneity across distinct disorder studies. Similar efforts are needed to examine these questions in other populations.

In sum, in a large-scale cross-disorder genome-wide meta-analysis, we identified three genetic factors underlying the genetic basis of eight psychiatric disorders. We also identified 109 genomic loci with pleiotropic effects, of which 33 have not previously been associated with any of the individual disorders. In addition, we identified 11 loci with opposing directional effects on two or more psychiatric disorders. These results highlight disparities between our clinically-defined classification of psychiatric disorders and underlying biology. Future research is warranted to determine whether more genetically-defined influences on cross-diagnostic traits or subtypes of dissect may inform a biologically-informed reconceptualization of psychiatric nosology. Finally, we found that genes associated with multiple psychiatric disorders are disproportionately associated with biological pathways related to neurodevelopment and exhibit distinctive gene expression patterns, with enhanced expression beginning in the second prenatal trimester and persistently elevated expression relative to less pleiotropic genes. Therapeutic modulation of pleiotropic gene products could have broad-spectrum effects on psychopathology.



## CONSORTIA

Phil H. Lee<sup>1,2</sup>, Verner Anttila<sup>3,2,4</sup>, Hyejung Won<sup>5</sup>, Yen-Chen Feng<sup>1,393,2</sup>, Jacob Rosenthal<sup>1,6</sup>, Zhaozhong Zhu<sup>1,7</sup>, Elliot M. Tucker-Drob<sup>8,9</sup>, Michel G. Nivard<sup>440</sup>, Andrew D. Grotzinger<sup>8</sup>, Danielle Posthuma<sup>15,16</sup>, Meg M.-J. Wang<sup>1,7</sup>, Dongmei Yu<sup>2,12,432</sup>, Eli Stahl<sup>13,14</sup>, Raymond K. Walters<sup>3,2,4</sup>, Richard J.L. Anney<sup>29</sup>, Laramie E. Duncan<sup>21</sup>, Sintia Belangero<sup>22,23</sup>, Jurjen Luykx<sup>208,94</sup>, Henry Kranzler<sup>24,25</sup>, Anna Keski-Rahkonen<sup>26</sup>, Edwin H. Cook<sup>28</sup>, George Kirov<sup>29</sup>, Giovanni Coppola-, Jaakko Kaprio<sup>26,264</sup>, Clement C. Zai<sup>31</sup>, Pieter J. Hoekstra<sup>32</sup>, Tobias Banaschewski-, Luis A. Rohde<sup>33,34</sup>, Joanna Martin<sup>39,40,41</sup>, Esben Agerbo<sup>35,42,43</sup>, Gísli Baldursson<sup>44</sup>, Richard Belliveau<sup>39</sup>, Jonas Bybjerg-Grauholm<sup>35,45</sup>, Marie Bækvad-Hansen<sup>35,45</sup>, Felecia Cerrato<sup>39</sup>, Kimberly Chamber<sup>39</sup>, Claire Churchhouse<sup>38,39,46</sup>, Crosbie Jennifer<sup>53</sup>, Ashley Dumont<sup>39</sup>, Jakob Grove<sup>35,36,37,49</sup>, Olafur O. Gudmundsson<sup>50,51,44</sup>, Christine S. Hansen<sup>35,45,52</sup>, Daniel P. Howrigan<sup>38,39</sup>, Hailiang Huang<sup>38,39</sup>, Alicia R. Martin<sup>38,39,46</sup>, Duncan S. Palmer<sup>38,39</sup>, Carsten B. Pedersen<sup>35,42,43</sup>, Marianne G. Pedersen<sup>35,42,43</sup>, Timothy Poterba<sup>38,39,46</sup>, Jesper B. Poulsen<sup>35,45</sup>, F. Kyle Satterstrom<sup>38,39,46</sup>, Hreinn Stefansson<sup>50</sup>, Patrick Turley<sup>38,39</sup>, <sup>23</sup>andMe Research Team<sup>47</sup>, Christie L. Burton<sup>53</sup>, Hakon Hakonarson<sup>58</sup>, Klaus-Peter Lesch<sup>59,60,61</sup>, Andreas Reif<sup>64</sup>, Russell Schachar<sup>53</sup>, Sarah E. Medland<sup>48</sup>, David M. Hougaard<sup>35,45</sup>, Thomas Werge<sup>35,52,66</sup>, Ole Mors<sup>35,67</sup>, Preben B. Mortensen<sup>35,36,42,43</sup>, Francesco Bettella<sup>69,70</sup>, Jane H. Christensen<sup>35,36,37</sup>, Silvia De Rubeis<sup>71,65</sup>, Srdjan Djurovic<sup>438,75</sup>, Christina M. Hultman<sup>40</sup>, Lambertus Klei<sup>74</sup>, Mette Nyegaard<sup>35,36,37</sup>, Terje Nærland<sup>69,76</sup>, Beate St Pourcain<sup>77,78,79</sup>, Per Qvist<sup>35,36,37</sup>, Karola Rehnström<sup>80</sup>, Abraham Reichenberg<sup>71,65,72</sup>, Jennifer Reichert<sup>71,65</sup>, Kathryn Roeder<sup>81,82</sup>, Evald Saemundsen<sup>83</sup>, Sven Sandin<sup>71,65,40</sup>, Peter A. Holmans<sup>20</sup>, Lauren A. Weiss<sup>88</sup>, Richard Delorme<sup>95,93,92</sup>, Jonas Bybjerg-Grauholm<sup>90</sup>, Dorothy E. Grice<sup>65</sup>, Christine Ladd-Acosta<sup>96</sup>, Pall Magnusson<sup>44</sup>, Dalila Pinto<sup>71,65,98,73,99</sup>, Guy A. Rouleau<sup>100</sup>, A. Jeremy Willsey<sup>87</sup>, Hilary Coon<sup>97</sup>, James S. Sutcliffe<sup>102,443</sup>, Dan E. Arking<sup>89</sup>, Kari Stefansson<sup>84,86</sup>, Andreas J. Forstner<sup>105,106,107,108,109</sup>, Andrew McQuillin<sup>110</sup>, Yunpeng Wang<sup>112,113,461</sup>, Jonathan R.I. Coleman<sup>103,104</sup>, Héléna A. Gaspar<sup>103,104</sup>, Enda M. Byrne<sup>119</sup>, Huda Akil<sup>120</sup>, Diego Albani<sup>121</sup>, Adebayo Anjorin<sup>123</sup>, Nicholas Bass<sup>110</sup>, Michael Bauer<sup>124</sup>, Sarah E. Bergen<sup>125</sup>, Monika Budde<sup>128</sup>, William Bunney<sup>129</sup>, William Byerley<sup>130</sup>, Toni-Kim Clarke<sup>131</sup>, David Curtis<sup>133,134</sup>, Anders M. Dale<sup>136,137,138,139</sup>, Torbjørn Elvsåshagen<sup>141,142</sup>, Sascha B. Fischer<sup>105,109</sup>, Liz Forty<sup>29</sup>, Josef Frank<sup>144</sup>, Katrin Gade<sup>128,148</sup>, Scott D. Gordon<sup>150</sup>, Katherine Gordon-Smith<sup>151</sup>, Tiffany A. Greenwood<sup>138</sup>, José Guzman-Parra<sup>153</sup>, Martin Hautzinger<sup>154</sup>, Urs Heilbronner<sup>128</sup>, Stefan Herms<sup>105,107,109</sup>, Per Hoffmann<sup>105,107,109</sup>, Dominic Holland<sup>136,155</sup>, Stéphane Jamain<sup>156,157</sup>, Radhika Kandaswamy<sup>110</sup>, James L. Kennedy<sup>158,159,160,161</sup>, Sarah Kittel-Schneider<sup>64</sup>, Manolis Kogevinas<sup>163</sup>, Anna C. Koller<sup>107</sup>, Catharina Lavebratt<sup>146</sup>, Susanne Lucae<sup>164</sup>, Anna Maaser<sup>107</sup>, Lina Martinsson<sup>147</sup>, Grant W. Montgomery<sup>116,117,118</sup>, Derek W. Morris<sup>166,167</sup>, Niamh Mullins<sup>103</sup>, Caroline M. Nievergelt<sup>138,169</sup>, Annelie Nordin Adolfsson<sup>27</sup>, Loes M.O. Loohuis<sup>145</sup>, Roy H. Perlis<sup>170,171</sup>, Amy Perry<sup>151</sup>, James B. Potash<sup>140</sup>, Céline S. Reinbold<sup>105,109</sup>, Margarita Rivera<sup>103,172</sup>, Engilbert Sigurdsson<sup>175</sup>, Olav B. Smeland<sup>176,177</sup>, Fabian Streit<sup>144</sup>, Jana Strohmaier<sup>144</sup>, Thorgeir E. Thorgeirsson<sup>114</sup>, Jens Treutlein<sup>144</sup>, Stephanie H. Witt<sup>144</sup>, Peter Zandi<sup>179</sup>, Ingrid Agartz<sup>111,126,180</sup>, Martin Alda<sup>149,181</sup>, Lena Backlund<sup>147</sup>, Bernhard T. Baune<sup>182,441</sup>, Wade H. Berrettini<sup>183</sup>, Joanna M. Biernacka<sup>173</sup>, Douglas H. R. Blackwood<sup>131</sup>, Nicholas Craddock<sup>29</sup>, Udo Dannlowski<sup>184</sup>, Janice M. Fullerton<sup>174,185</sup>, Elliot S. Gershon<sup>122,186</sup>, Fernando S. Goes<sup>140</sup>, Maria Grigoriou-Serbanescu<sup>187</sup>, Joanna Hauser<sup>135</sup>, Ian Jones<sup>29</sup>, Lisa A. Jones<sup>151</sup>, Cathryn M. Lewis<sup>103,104,188</sup>, Jolanta Lissowska<sup>189</sup>, Ingrid Melle<sup>192,193</sup>, Philip B. Mitchell<sup>152</sup>, Gunnar Morken<sup>194,195</sup>, Bertram Müller-Myhsok<sup>132,196,197</sup>, Markus M. Nöthen<sup>107</sup>, Ketil J. Ødegaard<sup>198,199,462</sup>, Michael J. Owen<sup>29</sup>, Sara A. Paciga<sup>200</sup>, Carlos Pato<sup>162,201</sup>, Michele T. Pato<sup>162</sup>, Marcella Rietschel<sup>144</sup>, Martin Schalling<sup>146</sup>, Thomas G. Schulze<sup>128,140,144,148,191</sup>, Alessandro Serretti<sup>202</sup>, Eystein Stordal<sup>203,204</sup>, Arne E. Vaaler<sup>205</sup>, Eduard Vieta<sup>206</sup>, John B. Vincent<sup>178</sup>, Arianna Di Florio<sup>29</sup>, Sven Cichon<sup>105,107,109,168</sup>, Roel A. Ophoff<sup>145,127</sup>, Laura J. Scott<sup>143</sup>, Roger A.H. Adan<sup>208,209,210</sup>, Lars Alfredsson<sup>211</sup>, Tetsuya Ando<sup>212</sup>, Harald Aschauer<sup>213</sup>, Jessica H. Baker<sup>214</sup>, Vladimir Bencko<sup>215</sup>, Andrew W. Bergen<sup>216,217</sup>,

Andreas Birgegård<sup>218,219</sup>, Vesna Boraska Perica<sup>221,222</sup>, Harry Brandt<sup>223</sup>, Roland Burghardt<sup>227</sup>, Laura Carlberg<sup>228</sup>, Matteo Cassina<sup>229</sup>, Maurizio Clementi<sup>229</sup>, Philippe Courtet<sup>230</sup>, Steven Crawford<sup>223</sup>, Scott Crow<sup>231</sup>, James J. Crowley<sup>232,233</sup>, Unna N. Danner<sup>209</sup>, Oliver S.P. Davis<sup>78,234</sup>, Daniela Degortes<sup>235</sup>, Janiece E. DeSocio<sup>236</sup>, Danielle M. Dick<sup>237</sup>, Christian Dina<sup>238,239</sup>, Elisa Docampo<sup>240,241,242</sup>, Karin Egberts<sup>243</sup>, Stefan Ehrlich<sup>244</sup>, Thomas Espeseth<sup>245</sup>, Fernando Fernández-Aranda<sup>246,247</sup>, Manfred M. Fichter<sup>248,249</sup>, Lenka Foretova<sup>251</sup>, Monica Forzan<sup>229</sup>, Giovanni Gambaro<sup>252</sup>, Ina Giegling<sup>253</sup>, Fragiskos Gonidakis<sup>254</sup>, Philip Gorwood<sup>220,255</sup>, Monica Gratacos Mayora<sup>240,241,242</sup>, Yiran Guo<sup>256,447</sup>, Katherine A. Halmi<sup>257</sup>, Beate Herpertz-Dahlmann<sup>225</sup>, Wolfgang Herzog<sup>258</sup>, Anke Hinney<sup>250</sup>, Susana Jiménez-Murcia<sup>246,247</sup>, Craig Johnson<sup>259</sup>, Jennifer Jordan<sup>260,261</sup>, Deborah Kaminska<sup>263</sup>, Leila Karhunen<sup>450</sup>, Andreas Karwautz<sup>265</sup>, Martien J.H. Kas<sup>208,266</sup>, Walter H. Kaye<sup>267</sup>, Martin Kennedy L.<sup>268</sup>, Youl-Ri Kim<sup>269</sup>, Lars Klareskog<sup>270</sup>, Kelly L. Klump<sup>271</sup>, Gun Peggy S. Knudsen<sup>449</sup>, Mikael Landén<sup>40</sup>, Stephanie Le Hellard<sup>273,274,275</sup>, Robert D. Levitan<sup>276</sup>, Dong Li<sup>256</sup>, Paul Lichtenstein<sup>40</sup>, Mario Maj<sup>277</sup>, Sara Marsal<sup>262</sup>, Sara McDewitt<sup>278,279</sup>, James Mitchell<sup>280</sup>, Palmiero Monteleone<sup>282</sup>, Alessio Maria Monteleone<sup>277</sup>, Melissa A. Munn-Chernoff<sup>214</sup>, Benedetta Nacmias<sup>283</sup>, Marie Navratilova<sup>251</sup>, Julie K. O'Toole<sup>284</sup>, Leonid Padyukov<sup>270</sup>, Jacques Pantel<sup>220</sup>, Hana Papezova<sup>263</sup>, Raquel Rabionet<sup>285,286,287</sup>, Anu Raevuori<sup>26</sup>, Nicolas Ramoz<sup>220</sup>, Ted Reichborn-Kjennerud<sup>272,288</sup>, Valdo Ricca<sup>289</sup>, Marion Roberts<sup>224,452</sup>, Dan Rujescu<sup>253,248</sup>, Filip Rybakowski<sup>290</sup>, André Scherag<sup>291</sup>, Ulrike Schmidt<sup>448</sup>, Jochen Seitz<sup>225</sup>, Lenka Slachtova<sup>293</sup>, Margarita C.T. Slof-Op 't Landt<sup>294,295</sup>, Agnieszka Slopian<sup>296</sup>, Sandro Sorbi<sup>283,297</sup>, Lorraine Southam<sup>312,221</sup>, Michael Strober<sup>298,299</sup>, Alfonso Tortorella<sup>301,302</sup>, Federica Tozzi<sup>303</sup>, Janet Treasure<sup>224</sup>, Konstantinos Tziouvas<sup>304</sup>, Annemarie A. van Elburg<sup>209,305</sup>, Tracey D. Wade<sup>306</sup>, Esther Walton<sup>244</sup>, Hunna J. Watson<sup>214,307,308</sup>, H-Erich Wichmann<sup>309</sup>, D. Blake Woodside<sup>310,311</sup>, Zeynep Yilmaz<sup>214,300</sup>, Eleftheria Zeggini<sup>221,312</sup>, Stephanie Zerwas<sup>214,312</sup>, Stephan Zipfel<sup>313</sup>, Mark J. Adams<sup>314</sup>, Till F.M. Andlauer<sup>315,446</sup>, Elisabeth B. Binder<sup>318,315</sup>, Enrique Castelao<sup>320</sup>, Lucía Colodro-Conde<sup>321</sup>, Nese Direk<sup>322,323</sup>, Anna R. Docherty<sup>496,497</sup>, Erin C. Dunn<sup>1,170,2</sup>, Jerome C. Foo<sup>324</sup>, Carsten Horn<sup>325</sup>, Jouke-Jan Hottenga<sup>10</sup>, David Howard<sup>131</sup>, Marcus Ising<sup>164</sup>, Hamdi Mbarek<sup>10</sup>, Christel M. Middeldorp<sup>54,62,63</sup>, Sara Mostafavi<sup>328,329</sup>, Roseann E. Peterson<sup>316,330</sup>, Giorgio Pistis<sup>320</sup>, Jorge A. Quiroz<sup>331</sup>, Eva C. Schulte<sup>128,332</sup>, Jianxin Shi<sup>333</sup>, Daniel J. Smith<sup>334</sup>, Pippa A. Thomson<sup>336</sup>, Sandra van der Auwera<sup>337</sup>, Bernhard T. Baune<sup>338</sup>, Klaus Berger<sup>335</sup>, Dorret I. Boomsma<sup>10</sup>, EJC de. Geus<sup>339,10</sup>, Enrico Domenici<sup>340</sup>, Katharina Domschke<sup>341</sup>, Hans J. Grabe<sup>337</sup>, Steven P. Hamilton<sup>342</sup>, Stefan Kloiber<sup>343,178,164</sup>, Glyn Lewis<sup>344</sup>, Qingqin S. Li<sup>345</sup>, Patrik K. Magnusson<sup>319</sup>, Brenda WJH. Penninx<sup>317</sup>, David J. Porteous<sup>336</sup>, Martin Preisig<sup>320</sup>, Catherine Schaefer<sup>326</sup>, Henning Tiemeier<sup>346,322,347</sup>, Rudolf Uher<sup>348</sup>, Myrna M. Weissman<sup>349,327</sup>, Douglas F. Levinson<sup>350</sup>, Cathy L. Barr<sup>351,352,353</sup>, Lawrence W. Brown<sup>464</sup>, Cathy Budman<sup>460</sup>, Keun-Ah Cheon-, Barbara J. Coffey<sup>465,394</sup>, Lea K. Davis<sup>453</sup>, Andrea Dietrich<sup>355,32</sup>, Thomas V. Fernandez<sup>356</sup>, Blanca Garcia-Delgar<sup>466</sup>, Donald L. Gilbert<sup>430</sup>, Marco A. Grados<sup>357</sup>, Julie Hagstrøm<sup>467</sup>, Andreas Hartmann<sup>358,359,360</sup>, Tammy Hedderly<sup>468</sup>, Gary A. Heiman<sup>469,470,471,472</sup>, Isobel Heyman-, Hyun Ju Hong<sup>473,474</sup>, Chaim Huyser<sup>361,362</sup>, Young Key Kim<sup>475</sup>, Young-Shin Kim<sup>476</sup>, Robert A. King<sup>356</sup>, Yun-Joo Koh<sup>477,478</sup>, Anastasios Konstantinidis<sup>292,442</sup>, Sodahm Kook<sup>479,480,474</sup>, Samuel Kuperman<sup>363</sup>, Bennett L. Leventhal<sup>354</sup>, Marcos Madruga-Garrido<sup>364</sup>, Athanasios Maras<sup>365</sup>, Pablo Mir<sup>368,369</sup>, Astrid Morer<sup>495,425,491,491</sup>, Kirsten Müller-Vahl<sup>492</sup>, Tara L. Murphy<sup>481</sup>, Alexander Münchau<sup>482</sup>, Peter Nagy-, Peristera Paschou<sup>370</sup>, Christopher Pittenger<sup>371</sup>, Kerstin J. Plessen<sup>483</sup>, Renata Rizzo<sup>457</sup>, Mary Robertson<sup>372</sup>, Veit Roessner<sup>373</sup>, Paul Sandor<sup>374,375,376</sup>, Eun-Young Shin<sup>484</sup>, Dong-Ho Song<sup>474,485,484</sup>, Manfred Stuhmann<sup>434</sup>, Zsanett Tarnok-, Jay A. Tischfield<sup>426</sup>, Jennifer Tübing<sup>486</sup>, Frank Visscher<sup>377</sup>, Sina Wanderer-, Martin Woods<sup>468</sup>, Yulia Worbe-, Samuel H. Zinner<sup>487,493</sup>, Valsamma Eapen-, Paul D. Arnold<sup>378,379,380</sup>, Katharina Bey<sup>91</sup>, O. Joseph Bienvenu<sup>381</sup>, Donald Black<sup>390</sup>, Valentina Ciullo<sup>439</sup>, Danielle Cusi<sup>426</sup>, Damiaan Denys-, Peter Falkai<sup>445</sup>, Daniel A. Geller<sup>429</sup>, Edna Grünblatt<sup>428</sup>, Gregory L. Hanna<sup>382</sup>, Ekaterina A. Khramtsova<sup>435</sup>, James T. McCracken<sup>488,489</sup>, Inge Meijer<sup>490</sup>, Gerald Nestadt<sup>357</sup>, Paul S. Nestadt<sup>140</sup>, Humberto Nicolini<sup>385,383</sup>, Erika Nurmi<sup>458</sup>, Fabrizio Piras<sup>439</sup>, Federica Piras<sup>439</sup>, Margaret A. Richter<sup>386,374</sup>, Stephan Ruhrmann<sup>444</sup>, Jack F. Samuels<sup>357</sup>, Gianfranco Spalletta<sup>439</sup>, Dan J. Stein<sup>384,387</sup>, Eric A. Storch-, Barbara Stranger<sup>435</sup>, Nienke Vulink-, Michael Wagner<sup>165</sup>, Susanne Walitza<sup>428</sup>, Gwyneth Zai<sup>374</sup>, Elvira Bramon<sup>391</sup>, Nancy G. Buccola<sup>392</sup>, Murray J. Cairns<sup>416</sup>, Dominique Campion<sup>396</sup>, Vaughan J.



Carr<sup>395</sup>, C. Robert Cloninger<sup>398</sup>, Gary Donohoe<sup>400</sup>, Robert Freedman<sup>403</sup>, Annette M. Hartmann<sup>253</sup>, Frans A. Henskens<sup>404,463</sup>, Masashi Ikeda<sup>405</sup>, Nakao Iwata<sup>405</sup>, Assen V. Jablensky<sup>406</sup>, Inge Joa<sup>407</sup>, Erik G. Jönsson<sup>455,456</sup>, Brian J. Kelly<sup>408</sup>, Jo Knight<sup>427</sup>, Bettina Konte<sup>253</sup>, Claudine Laurent-Levinson<sup>388,494</sup>, Jimmy Lee<sup>397</sup>, Todd Lencz<sup>409</sup>, Carmel M. Loughland<sup>395</sup>, Anil K. Malhotra<sup>409</sup>, Colm McDonald<sup>410</sup>, Marina Mitjans<sup>389</sup>, Bryan J. Mowry<sup>411</sup>, Robin M. Murray<sup>413</sup>, Jim van Os<sup>94,12,413</sup>, Christos Pantelis<sup>414</sup>, Psychosis Endophenotypes International Consortium, Tracey L. Petryshen<sup>459</sup>, Digby J. Quested<sup>415,451</sup>, Alan R. Sanders<sup>401</sup>, Ulrich Schall<sup>408</sup>, Sibylle G. Schwab<sup>436,437</sup>, Rodney J. Scott<sup>416</sup>, Jeremy M. Silverman<sup>394</sup>, Agnes A. Steixner<sup>389</sup>, Paul A. Tooney<sup>416</sup>, Mark Weiser<sup>399</sup>, Dieter B. Wildenauer<sup>417</sup>, Wellcome Trust Case-Control Consortium 2, Fuquan Zhang<sup>454</sup>, Patrick F. Sullivan<sup>68,85,40</sup>, Barbara Franke<sup>30</sup>, Mark J. Daly<sup>38,39,46</sup>, Cynthia M. Bulik<sup>214,40,226</sup>, Cathryn M. Lewis<sup>103,104,188</sup>, Andrew M. McIntosh<sup>131,190</sup>, Michael C. O'Donovan<sup>29</sup>, Amanda Zheutlin<sup>1</sup>, Ole A. Andreassen<sup>419,420</sup>, Anders D. Børglum<sup>35,36,37</sup>, Gerome Breen<sup>103,104</sup>, Howard J. Edenberg<sup>207</sup>, Ayman H. Fanous<sup>402</sup>, Stephen V. Faraone<sup>418</sup>, Joel Gelernter<sup>56,57</sup>, Carol A. Mathews<sup>366,367</sup>, Manuel Mattheisen<sup>17,18,19</sup>, Karen Mitchell<sup>281</sup>, Michael C. Neale-, John I. Nurnberger<sup>431</sup>, Stephan Ripke<sup>3,2,4,11</sup>, Susan L. Santangelo<sup>101,433</sup>, Jeremiah M. Scharf<sup>2,4,12,432</sup>, Murray Stein-, Laura M. Thornton<sup>214</sup>, James T.R. Walters<sup>29</sup>, Naomi R. Wray<sup>115,119</sup>, Daniel H. Geschwind<sup>421,422,423</sup>, Benjamin Neale<sup>3,2,4</sup>, Kenneth S. Kendler<sup>424</sup>, Jordan W. Smoller<sup>1,2,12</sup>

- 1, Psychiatric and Neurodevelopmental Genetics Unit (PNGU) and the Center for Genomic Medicine, Massachusetts General Hospital, Boston, MA, USA
- 2, Stanley Center for Psychiatric Research, Broad Institute of MIT and Harvard, Cambridge, Massachusetts, USA
- 3, Analytic and Translational Genetics Unit, Massachusetts General Hospital and Harvard Medical School, Boston, Massachusetts, USA
- 4, Program in Medical and Population Genetics, Broad Institute of MIT and Harvard, Cambridge, Massachusetts, USA
- 5, UNC Neuroscience Center, University of North Carolina, Chapel Hill, NC 27599, USA
- 6, Department of Biostatistics, Harvard T.H. Chan School of Public Health, Boston, Massachusetts, USA
- 7, Department of Epidemiology, Harvard T.H. Chan School of Public Health, Boston, Massachusetts, USA
- 8, Department of Psychology, University of Texas at Austin, Austin, TX USA
- 9, Department of Psychiatry, and Population Research Center, University of Texas at Austin, Austin, TX USA
- 10, Vrije Universiteit Amsterdam, Dept of Biological Psychology & EMGO+ Institute for Health and Care Research, Amsterdam, NL
- 11, Charite Universitätsmedizin Berlin, Berlin, Germany
- 12, Center for Genomic Medicine, Massachusetts General Hospital, Boston, MA, USA
- 13, Icahn School of Medicine at Mount Sinai, New York, NY, USA
- 14, Broad Institute of MIT and Harvard, Cambridge, USA
- 15, Department Complex Trait Genetics, Center for Neurogenomics and Cognitive Research, VU University, Amsterdam, The Netherlands
- 16, Department Clinical Genetics, VU University Medical Center, Amsterdam Neuroscience, Amsterdam, The Netherlands
- 17, Department of Psychiatry, Psychosomatics and Psychotherapy, Center of Mental Health, University Hospital Wuerzburg, Wuerzburg, Germany
- 18, Department of Biomedicine, Aarhus University, Aarhus, Denmark
- 19, Department of Clinical Neuroscience, Centre for Psychiatry Research, Karolinska Institutet, Stockholm, Sweden
- 20, MRC Centre for Neuropsychiatric Genetics and Genomics, Cardiff University, Cardiff, UK
- 21, Department of Psychiatry and Behavioral Sciences, Stanford University, Stanford, California, US
- 22, Department of Morphology and Genetics, Universidade Federal de São Paulo (UNIFESP), São Paulo, SP, Brazil

- 23, Interdisciplinary Laboratory of Clinical Neurosciences, Department of Psychiatry, Universidade Federal de São Paulo (UNIFESP), São Paulo, SP, Brazil
- 24, Department of Psychiatry, The Perelman School of Medicine, University of Pennsylvania, Philadelphia, PA, USA
- 25, Veterans Integrated Service Network (VISN4) Mental Illness Research, Education, and Clinical Center (MIRECC), Crescenz VA Medical Center, Philadelphia, PA, USA
- 26, Department of Public Health, University of Helsinki, Helsinki, Finland
- 27, Department of Clinical Sciences, Psychiatry, Umeå University Medical Faculty, Umeå, SE
- 28, Institute for Juvenile Research, Department of Psychiatry, University of Illinois at Chicago, Chicago, IL, USA
- 29, Medical Research Council Centre for Neuropsychiatric Genetics and Genomics, Division of Psychological Medicine and Clinical Neurosciences, Cardiff University, Cardiff, GB
- 30, Departments of Human Genetics (855) and Psychiatry, Donders Institute for Brain, Cognition and Behaviour, Radboud University Medical Centre, Nijmegen, The Netherlands
- 31, Campbell Family Mental Health Research Institute, Centre for Addiction and Mental Health, Toronto, Ontario, M5T 1R8, Canada
- 32, Department of Child and Adolescent Psychiatry, University Medical Center Groningen, University of Groningen, Groningen, The Netherlands
- 33, Department of Psychiatry, Faculty of Medicine, Universidade Federal do Rio Grande do Sul, Porto Alegre, Brazil
- 34, ADHD Outpatient Clinic, Hospital de Clínicas de Porto Alegre, Porto Alegre, Brazil
- 35, The Lundbeck Foundation Initiative for Integrative Psychiatric Research, iPSYCH, Denmark
- 36, Centre for Integrative Sequencing, iSEQ, Aarhus University, Aarhus, Denmark
- 37, Department of Biomedicine - Human Genetics, Aarhus University, Aarhus, Denmark
- 38, Analytic and Translational Genetics Unit, Department of Medicine, Massachusetts General Hospital and Harvard Medical School, Boston, Massachusetts, USA
- 39, Stanley Center for Psychiatric Research, Broad Institute of Harvard and MIT, Cambridge, Massachusetts, USA
- 40, Department of Medical Epidemiology and Biostatistics, Karolinska Institutet, Stockholm, Sweden
- 41, MRC Centre for Neuropsychiatric Genetics & Genomics, School of Medicine, Cardiff University, Cardiff, United Kingdom
- 42, National Centre for Register-Based Research, Aarhus University, Aarhus, Denmark
- 43, Centre for Integrated Register-based Research, Aarhus University, Aarhus, Denmark
- 44, Department of Child and Adolescent Psychiatry, National University Hospital, Reykjavik, Iceland
- 45, Center for Neonatal Screening, Department for Congenital Disorders, Statens Serum Institut, Copenhagen, Denmark
- 46, Program in Medical and Population Genetics, Broad Institute of Harvard and MIT, Cambridge, Massachusetts, USA
- 47, 23andMe, Mountain View, California, USA
- 48, QIMR Berghofer Medical Research Institute, Royal Brisbane Hospital, Brisbane, Australia
- 49, Bioinformatics Research Centre, Aarhus University, Aarhus, Denmark
- 50, deCODE genetics/Amgen, Reykjavík, Iceland
- 51, Faculty of Medicine, University of Iceland, Reykjavík, Iceland
- 52, Institute of Biological Psychiatry, MHC Sct. Hans, Mental Health Services Copenhagen, Roskilde, Denmark
- 53, Psychiatry, Neurosciences and Mental Health, The Hospital for Sick Children, University of Toronto, Toronto, Canada
- 54, Department of Biological Psychology, Neuroscience Campus Amsterdam, VU University, Amsterdam, The Netherlands
- 55, Departments of Human Genetics (855) and Psychiatry, Donders Institute for Brain, Cognition and Behaviour, Radboud University Medical Centre, Nijmegen, The Netherlands

- 56, Department of Psychiatry, Genetics, and Neuroscience, Yale University School of Medicine, New Haven, Connecticut, USA
- 57, Veterans Affairs Connecticut Healthcare Center, West Haven, Connecticut, USA
- 58, The Center for Applied Genomics, The Children's Hospital of Philadelphia, Philadelphia, PA, USA
- 59, Division of Molecular Psychiatry, Clinical Research Unit on Disorders of Neurodevelopment and Cognition. Laboratory of Translational Neuroscience. Center of Mental Health, University of Wuerzburg, Germany
- 60, Department of Neuroscience, School for Mental Health and Neuroscience (MHENS), Maastricht University, The Netherlands
- 61, Laboratory of Psychiatric Neurobiology, Institute of Molecular Medicine, I.M. Sechenov First Moscow State Medical University, Moscow, Russia
- 62, Child Health Research Centre, University of Queensland, Brisbane Australia
- 63, Child and Youth Mental Health Service, Children's Health Queensland Hospital and Health Service, Brisbane, Australia
- 64, Department of Psychiatry, Psychosomatic Medicine and Psychotherapy, University Hospital, Goethe University, Frankfurt am Main, DE
- 65, Department of Psychiatry, Icahn School of Medicine at Mount Sinai, New York, NY, USA
- 66, Department of Clinical Medicine, University of Copenhagen, Copenhagen, Denmark
- 67, Psychosis Research Unit, Aarhus University Hospital, Risskov, Denmark
- 68, Department of Genetics, University of North Carolina, Chapel Hill, NC, USA
- 69, NORMENT - KG Jebsen Centre for Psychosis Research, University of Oslo, Oslo, Norway
- 70, Division of Mental Health and Addiction, Oslo University Hospital, Oslo, Norway
- 71, Seaver Autism Center for Research and Treatment, Icahn School of Medicine at Mount Sinai, New York, NY, USA
- 72, Friedman Brain Institute, Icahn School of Medicine at Mount Sinai, New York, NY, USA
- 73, Mindich Child Health and Development Institute, Icahn School of Medicine at Mount Sinai, New York, NY, USA
- 74, Department of Psychiatry, University of Pittsburgh School of Medicine, Pittsburgh, PA, USA
- 75, Department of Medical Genetics, Oslo University Hospital, Oslo, Norway
- 76, NevSom, Department of Rare Disorders and Disabilities, Oslo University Hospital, Norway
- 77, Language and Genetics Department, Max Planck Institute for Psycholinguistics, Nijmegen, The Netherlands
- 78, MRC Integrative Epidemiology Unit, University of Bristol, Bristol, UK
- 79, Donders Institute for Brain, Cognition and Behaviour, Radboud University, Nijmegen, The Netherlands
- 80, Wellcome Trust Sanger Institute, Hinxton, Cambridge, UK
- 81, Computational Biology Department, Carnegie Mellon University, Pittsburgh, PA, USA
- 82, Department of Statistics and Data Science, Carnegie Mellon University, Pittsburgh, PA, USA
- 83, The State Diagnostic and Counselling Centre, Digranesvegur 5, Kópavogur, Iceland
- 84, deCODE genetics/Amgen, Sturlugata 8, Reykjavík, Iceland
- 85, Department of Psychiatry, University of North Carolina, Chapel Hill, NC, USA
- 86, Faculty of Medicine, University of Iceland, Reykjavik, Iceland
- 87, Department of Psychiatry, University of California San Francisco, San Francisco, CA, USA
- 88, Inst. Human Genetics, University of California San Francisco, San Francisco, CA, USA
- 89, McKusick-Nathans Institute of Genetic Medicine, Johns Hopkins University, Baltimore, MD, USA
- 90, Department for Congenital Disorders, Center for Neonatal Screening, Statens Serum Institut, Copenhagen, Denmark
- 91, Department of Psychiatry and Psychotherapy, University of Bonn, Bonn, Germany
- 92, FondaMental Foundation, Créteil, France
- 93, Human Genetics and Cognitive Functions Unit, Institut Pasteur, Paris, France

- 94, Department of Psychiatry, Brain Center Rudolf Magnus, University Medical Center Utrecht, Utrecht, CG, The Netherlands
- 95, Department of Child and Adolescent Psychiatry, Robert Debré Hospital, Assistance Publique – Hôpitaux de Paris, Paris, France
- 96, Department of Epidemiology, Johns Hopkins Bloomberg School of Public Health, Baltimore, MD, USA
- 97, Department of Psychiatry, University of Utah, Salt Lake City, UT, USA
- 98, Department of Genetics and Genomic Sciences, Icahn School of Medicine at Mount Sinai, New York, NY, USA
- 99, The Icahn Institute for Genomics and Multiscale Biology, Icahn School of Medicine at Mount Sinai, New York, NY, USA
- 100, Montreal Neurological Institute, Department of Neurology and Neurosurgery, McGill University, Montreal, QC, Canada
- 101, Maine Medical Center Research Institute, Portland, ME, USA
- 102, Vanderbilt Genetics Institute, Vanderbilt University Medical Center, Nashville, TN, USA
- 103, Social, Genetic and Developmental Psychiatry Centre, King's College London, London, GB
- 104, NIHR Maudsley Biomedical Research Centre, King's College London, London, GB
- 105, Department of Biomedicine, University of Basel, Basel, CH
- 106, Department of Psychiatry (UPK), University of Basel, Basel, CH
- 107, Institute of Human Genetics, University of Bonn, School of Medicine & University Hospital Bonn, Bonn, DE
- 108, Centre for Human Genetics, University of Marburg, Marburg, DE
- 109, Institute of Medical Genetics and Pathology, University Hospital Basel, Basel, CH
- 110, Division of Psychiatry, University College London, London, GB
- 111, Department of Clinical Neuroscience, Centre for Psychiatry Research, Karolinska Institutet, Stockholm, SE
- 112, Institute of Biological Psychiatry, Mental Health Centre Sct. Hans, Copenhagen, DK
- 113, Institute of Clinical Medicine, University of Oslo, Oslo, NO
- 114, deCODE Genetics / Amgen, Reykjavik, IS
- 115, Queensland Brain Institute, The University of Queensland, Brisbane, QLD, AU
- 116, QIMR Berghofer Medical Research Institute, Brisbane, Australia
- 117, Institute for Molecular Bioscience, University of Queensland, Brisbane, Australia
- 118, Queensland Brain Institute, University of Queensland, Brisbane, Australia
- 119, Institute for Molecular Bioscience, The University of Queensland, Brisbane, QLD, AU
- 120, Molecular & Behavioral Neuroscience Institute, University of Michigan, Ann Arbor, MI, US
- 121, NEUROSCIENCE, Istituto Di Ricerche Farmacologiche Mario Negri, Milano, IT
- 122, Department of Psychiatry and Behavioral Neuroscience, University of Chicago, Chicago, IL, US
- 123, Psychiatry, Berkshire Healthcare NHS Foundation Trust, Bracknell, GB
- 124, Department of Psychiatry and Psychotherapy, University Hospital Carl Gustav Carus, Technische Universität Dresden, Dresden, DE
- 125, Department of Medical Epidemiology and Biostatistics, Karolinska Institutet, Stockholm, SE
- 126, Department of Psychiatric Research, Diakonhjemmet Hospital, Oslo, NO
- 127, Human Genetics, University of California Los Angeles, Los Angeles, CA, US
- 128, Institute of Psychiatric Phenomics and Genomics (IPPG), University Hospital, LMU Munich, Munich, DE
- 129, Department of Psychiatry and Human Behavior, University of California, Irvine, Irvine, CA, US
- 130, Department of Psychiatry, University of California at San Francisco, San Francisco, California, 94143 USA
- 131, Division of Psychiatry, University of Edinburgh, Edinburgh, GB
- 132, Department of Translational Research in Psychiatry, Max Planck Institute of Psychiatry, Munich, DE



- 133, Centre for Psychiatry, Queen Mary University of London, London, GB
- 134, UCL Genetics Institute, University College London, London, GB
- 135, Department of Psychiatry, Laboratory of Psychiatric Genetics, Poznan University of Medical Sciences, Poznan, PL
- 136, Department of Neurosciences, University of California San Diego, La Jolla, CA, US
- 137, Department of Radiology, University of California San Diego, La Jolla, CA, US
- 138, Department of Psychiatry, University of California San Diego, La Jolla, CA, US
- 139, Department of Cognitive Science, University of California San Diego, La Jolla, CA, US
- 140, Department of Psychiatry and Behavioral Sciences, Johns Hopkins University School of Medicine, Baltimore, MD, US
- 141, Department of Neurology, Oslo University Hospital, Oslo, NO
- 142, NORMENT, KG Jebsen Centre for Psychosis Research, Oslo University Hospital, Oslo, NO
- 143, Center for Statistical Genetics and Department of Biostatistics, University of Michigan, Ann Arbor, MI, US
- 144, Department of Genetic Epidemiology in Psychiatry, Central Institute of Mental Health, Medical Faculty Mannheim, Heidelberg University, Mannheim, DE
- 145, Center for Neurobehavioral Genetics, University of California Los Angeles, Los Angeles, CA, US
- 146, Department of Molecular Medicine and Surgery, Karolinska Institutet and Center for Molecular Medicine, Karolinska University Hospital, Stockholm, SE
- 147, Department of Clinical Neuroscience, Karolinska Institutet and Center for Molecular Medicine, Karolinska University Hospital, Stockholm, SE
- 148, Department of Psychiatry and Psychotherapy, University Medical Center Göttingen, Göttingen, DE
- 149, Department of Psychiatry, Dalhousie University, Halifax, NS, CA
- 150, Genetics and Computational Biology, QIMR Berghofer Medical Research Institute, Brisbane, QLD, AU
- 151, Department of Psychological Medicine, University of Worcester, Worcester, GB
- 152, School of Psychiatry, University of New South Wales, Sydney, NSW, AU
- 153, Mental Health Department, University Regional Hospital, Biomedicine Institute (IBIMA), Málaga, ES
- 154, Department of Psychology, Eberhard Karls Universität Tübingen, Tübingen, DE
- 155, Center for Multimodal Imaging and Genetics, University of California San Diego, La Jolla, CA, US
- 156, Psychiatrie Translationnelle, Inserm U955, Créteil, FR
- 157, Faculté de Médecine, Université Paris Est, Créteil, FR
- 158, Campbell Family Mental Health Research Institute, Centre for Addiction and Mental Health, Toronto, ON, CA
- 159, Neurogenetics Section, Centre for Addiction and Mental Health, Toronto, ON, CA
- 160, Department of Psychiatry, University of Toronto, Toronto, ON, CA
- 161, Institute of Medical Sciences, University of Toronto, Toronto, ON, CA
- 162, Institute for Genomic Health, SUNY Downstate Medical Center College of Medicine, Brooklyn, NY, US
- 163, ISGlobal, Barcelona, Spain
- 164, Max Planck Institute of Psychiatry, Munich, DE
- 165, Department of Psychiatry and Psychotherapy, University of Bonn, Bonn, DE
- 166, Discipline of Biochemistry, Neuroimaging and Cognitive Genomics (NICOG) Centre, National University of Ireland, Galway, Galway, IE
- 167, Neuropsychiatric Genetics Research Group, Dept of Psychiatry and Trinity Translational Medicine Institute, Trinity College Dublin, Dublin, IE
- 168, Institute of Neuroscience and Medicine (INM-1), Research Centre Jülich, Jülich, DE
- 169, Research/Psychiatry, Veterans Affairs San Diego Healthcare System, San Diego, CA, US

- 170, Psychiatry, Harvard Medical School, Boston, MA, US
- 171, Division of Clinical Research, Massachusetts General Hospital, Boston, MA, US
- 172, Department of Biochemistry and Molecular Biology II, Institute of Neurosciences, Center for Biomedical Research, University of Granada, Granada, ES
- 173, Department of Health Sciences Research, Mayo Clinic, Rochester, MN, US
- 174, Neuroscience Research Australia, Sydney, NSW, AU
- 175, Faculty of Medicine, Department of Psychiatry, School of Health Sciences, University of Iceland, Reykjavik, IS
- 176, Div Mental Health and Addiction, Oslo University Hospital, Oslo, NO
- 177, NORMENT, University of Oslo, Oslo, NO
- 178, Centre for Addiction and Mental Health, Toronto, ON, CA
- 179, Department of Mental Health, Johns Hopkins University Bloomberg School of Public Health, Baltimore, MD, US
- 180, NORMENT, KG Jebsen Centre for Psychosis Research, Division of Mental Health and Addiction, Institute of Clinical Medicine and Diakonhjemmet Hospital, University of Oslo, Oslo, NO
- 181, National Institute of Mental Health, Klecany, CZ
- 182, Discipline of Psychiatry, University of Adelaide, Adelaide, SA, AU
- 183, Department of Psychiatry, Center for Neurobiology and Behavior, Perelman School of Medicine at the University of Pennsylvania, Philadelphia, Pennsylvania, US
- 184, Department of Psychiatry, University of Münster, Münster, DE
- 185, School of Medical Sciences, University of New South Wales, Sydney, NSW, AU
- 186, Department of Human Genetics, University of Chicago, Chicago, IL, US
- 187, Biometric Psychiatric Genetics Research Unit, Alexandru Obregia Clinical Psychiatric Hospital, Bucharest, RO
- 188, Department of Medical & Molecular Genetics, King's College London, London, GB
- 189, Cancer Epidemiology and Prevention, M. Skłodowska-Curie Institute – Oncology Center, Warsaw, PL
- 190, Centre for Cognitive Ageing and Cognitive Epidemiology, University of Edinburgh, Edinburgh, GB
- 191, Human Genetics Branch, Intramural Research Program, National Institute of Mental Health, Bethesda, MD, US
- 192, Division of Mental Health and Addiction, Oslo University Hospital, Oslo, NO
- 193, Division of Mental Health and Addiction, University of Oslo, Institute of Clinical Medicine, Oslo, NO
- 194, Mental Health, Faculty of Medicine and Health Sciences, Norwegian University of Science and Technology - NTNU, Trondheim, NO
- 195, Psychiatry, St Olavs University Hospital, Trondheim, NO
- 196, Munich Cluster for Systems Neurology (SyNergy), Munich, DE
- 197, University of Liverpool, Liverpool, GB
- 198, Division of Psychiatry, Haukeland Universitetssjukehus, Bergen, NO
- 199, Faculty of Medicine and Dentistry, University of Bergen, Bergen, NO
- 200, Human Genetics and Computational Biomedicine, Pfizer Global Research and Development, Groton, CT, US
- 201, College of Medicine Institute for Genomic Health, SUNY Downstate Medical Center College of Medicine, Brooklyn, NY, US
- 202, Department of Biomedical and NeuroMotor Sciences, University of Bologna, Bologna, IT
- 203, Department of Psychiatry, Hospital Namsos, Namsos, NO
- 204, Department of Neuroscience, Norges Teknisk Naturvitenskapelige Universitet Fakultet for naturvitenskap og teknologi, Trondheim, NO
- 205, Dept of Psychiatry, Sankt Olavs Hospital Universitetssykehuset i Trondheim, Trondheim, NO

- 206, Clinical Institute of Neuroscience, Hospital Clinic, University of Barcelona, IDIBAPS, CIBERSAM, Barcelona, ES
- 207, Biochemistry and Molecular Biology, Indiana University School of Medicine, Indianapolis, IN, US
- 208, Brain Center Rudolf Magnus, Department of Translational Neuroscience, University Medical Center Utrecht, Utrecht, The Netherlands
- 209, Center for Eating Disorders Rintveld, Altrecht Mental Health Institute, Zeist, The Netherlands
- 210, Sahlgrenska Academy, University of Gothenburg, Gothenburg, Sweden
- 211, Institute of Environmental Medicine, Karolinska Institutet, Stockholm, Sweden
- 212, Department of Behavioral Medicine, National Institute of Mental Health, National Center of Neurology and Psychiatry, Kodaira, Tokyo, Japan
- 213, Biopsychosocial Corporation, Vienna, Austria
- 214, Department of Psychiatry, University of North Carolina at Chapel Hill, Chapel Hill, North Carolina, US
- 215, First Faculty of Medicine, Institute of Hygiene and Epidemiology, Charles University, Prague, Czech Republic
- 216, BioRealm, LLC, Walnut, California, US
- 217, Oregon Research Institute, Eugene, Oregon, US
- 218, Department of Clinical Neuroscience, Karolinska Institutet, Stockholm, Sweden
- 219, Center for Psychiatry Research, Stockholm City Council, Stockholm, Sweden
- 220, INSERM U894, Centre of Psychiatry and Neuroscience, Paris, France
- 221, Wellcome Sanger Institute, Wellcome Genome Campus, Hinxton, Cambridge, UK
- 222, Department of Medical Biology, School of Medicine, University of Split, Split, Croatia
- 223, The Center for Eating Disorders at Sheppard Pratt, Baltimore, Maryland, US
- 224, Institute of Psychiatry, Psychology and Neuroscience, Social, Genetic and Developmental Psychiatry (SGDP) Centre, King's College London, London, UK
- 225, Department of Child and Adolescent Psychiatry, Psychosomatics and Psychotherapy, RWTH Aachen University, Aachen, Germany
- 226, Department of Nutrition, University of North Carolina at Chapel Hill, Chapel Hill, North Carolina, US
- 227, Klinikum Frankfurt/Oder, Frankfurt, Germany
- 228, Medical University of Vienna, Vienna, Austria
- 229, Clinical Genetics Unit, Department of Woman and Child Health, University of Padova, Padova, Italy
- 230, Department of Emergency Psychiatry and Post-Acute Care, CHRU Montpellier, University of Montpellier, Montpellier, France
- 231, Department of Psychiatry, University of Minnesota, Minneapolis, Minnesota, US
- 232, Department of Genetics, University of North Carolina at Chapel Hill, Chapel Hill, North Carolina, US
- 233, Department of Clinical Neuroscience, Karolinska Institutet, Stockholm, Sweden
- 234, School of Social and Community Medicine, University of Bristol, Bristol, UK
- 235, Department of Neurosciences, University of Padova, Padova, Italy
- 236, College of Nursing, Seattle University, Seattle, Washington, US
- 237, Department of Psychology, Virginia Commonwealth University, Richmond, Virginia, US
- 238, L'institut du thorax, INSERM, CNRS, UNIV Nantes, Nantes, France
- 239, L'institut du thorax, CHU Nantes, Nantes, France
- 240, Barcelona Institute of Science and Technology, Barcelona, Spain
- 241, Universitat Pompeu Fabra, Barcelona, Spain
- 242, Centro de Investigación Biomédica en Red en Epidemiología y Salud Pública (CIBERESP), Barcelona, Spain
- 243, Department of Child and Adolescent Psychiatry, Psychosomatics and Psychotherapy, University Hospital of Würzburg, Centre for Mental Health, Würzburg, Germany

- 244, Division of Psychological and Social Medicine and Developmental Neurosciences, Faculty of Medicine, Technische Universität Dresden, Dresden, Germany
- 245, Department of Psychology, University of Oslo, Oslo University Hospital, Oslo, Norway
- 246, Department of Psychiatry, University Hospital of Bellvitge –IDIBELL and CIBERObn, Barcelona, Spain
- 247, Department of Clinical Sciences, School of Medicine, University of Barcelona, Barcelona, Spain
- 248, Department of Psychiatry and Psychotherapy, Ludwig-Maximilians-University (LMU), Munich, Germany
- 249, Schön Klinik Roseneck affiliated with the Medical Faculty of the University of Munich (LMU), Munich, Germany
- 250, Department of Child and Adolescent Psychiatry, University Hospital Essen , University of Duisburg-Essen, Essen, Germany
- 251, Department of Cancer, Epidemiology and Genetics, Masaryk Memorial Cancer Institute, Brno, Czech Republic
- 252, Division of Nephrology and Dialysis, Institute of Internal Medicine and Medical Specialties, Columbus-Gemelli University Hospital, Rome, Italy
- 253, Department of Psychiatry, Psychotherapy and Psychosomatics, Martin Luther University of Halle-Wittenberg, Halle, Germany
- 254, 1st Psychiatric Department, National and Kapodistrian University of Athens, Medical School, Eginition Hospital, Athens, Greece
- 255, CMME (Groupe Hospitalier Sainte-Anne), Paris Descartes University, Paris, France
- 256, Center for Applied Genomics, Children's Hospital of Philadelphia, Philadelphia, Pennsylvania, US
- 257, Department of Psychiatry, Weill Cornell Medical College, New York, New York, US
- 258, Department of General Internal Medicine and Psychosomatics, Heidelberg University Hospital, Heidelberg University, Heidelberg, Germany
- 259, Eating Recovery Center, Denver, Colorado, US
- 260, Department of Psychological Medicine, University of Otago, Christchurch, New Zealand
- 261, Canterbury District Health Board, Christchurch, New Zealand
- 262, Rheumatology Research Group, Vall d'Hebron Research Institute, Barcelona, Spain
- 263, Department of Psychiatry, First Faculty of Medicine, Charles University, Prague, Czech Republic
- 264, Institute for Molecular Medicine Finland, Helsinki Institute of Life Science, University of Helsinki, Helsinki, Finland
- 265, Eating Disorders Unit, Department of Child and Adolescent Psychiatry, Medical University of Vienna, Vienna, Austria
- 266, Groningen Institute for Evolutionary Life Sciences, University of Groningen, Groningen, The Netherlands
- 267, Department of Psychiatry, University of California San Diego, San Diego, California, US
- 268, Department of Pathology and Biomedical Science, University of Otago, Christchurch, New Zealand
- 269, Department of Psychiatry, Seoul Paik Hospital, Inje University, Seoul, Korea
- 270, Division of Rheumatology, Department of Medicine Solna, Karolinska Institutet and Karolinska University Hospital, Stockholm, Sweden
- 271, Department of Psychology, Michigan State University, East Lansing, Michigan, US
- 272, Department of Mental Disorders, Norwegian Institute of Public Health, Oslo, Norway
- 273, Department of Clinical Science, K.G. Jebsen Centre for Psychosis Research, Norwegian Centre for Mental Disorders Research (NORMENT), University of Bergen, Bergen, Norway
- 274, Dr. Einar Martens Research Group for Biological Psychiatry, Center for Medical Genetics and Molecular Medicine, Haukeland University Hospital, Bergen, Norway



- 275, Department of Clinical Medicine, Laboratory Building, Haukeland University Hospital, Bergen, Norway
- 276, Institute of Medical Science, University of Toronto, Toronto, Canada
- 277, Department of Psychiatry, University of Campania Luigi Vanvitelli, Naples, Italy
- 278, Department of Psychiatry, University College Cork, Cork, Ireland
- 279, Eist Linn Adolescent Unit, Bessborough, Health Service Executive South, Cork, Ireland
- 280, Department of Psychiatry and Behavioral Science, University of North Dakota School of Medicine and Health Sciences, Fargo, North Dakota, US
- 281, National Center for PTSD, VA Boston Healthcare System, Department of Psychiatry, Boston University School of Medicine, Boston, Massachusetts, US
- 282, Department of Medicine, Surgery and Dentistry Scuola Medica Salernitana, University of Salerno, Salerno, Italy
- 283, Department of Neuroscience, Psychology, Drug Research and Child Health (NEUROFARBA), University of Florence, Florence, Italy
- 284, Kartini Clinic, Portland, Oregon, US
- 285, Saint Joan de Déu Research Institute, Saint Joan de Déu Barcelona Children's Hospital, Barcelona, Spain
- 286, Institute of Biomedicine (IBUB), University of Barcelona, Barcelona, Spain
- 287, Department of Genetics, Microbiology and Statistics, University of Barcelona, Barcelona, Spain
- 288, Institute of Clinical Medicine, University of Oslo, Oslo, Norway
- 289, Department of Health Science, University of Florence, Florence, Italy
- 290, Department of Psychiatry, Poznan University of Medical Sciences, Poznan, Poland
- 291, Institute of Medical Statistics, Computer and Data Sciences, Jena University Hospital, Jena, Germany
- 292, Department of Psychiatry and Psychotherapy, Medical University of Vienna, Vienna, Austria
- 293, Department of Pediatrics and Center of Applied Genomics, First Faculty of Medicine, Charles University, Prague, Czech Republic
- 294, Center for Eating Disorders Ursula, Rivierduinen, Leiden, The Netherlands
- 295, Department of Psychiatry, Leiden University Medical Centre, Leiden, The Netherlands
- 296, Department of Child and Adolescent Psychiatry, Poznan University of Medical Sciences, Poznan, Poland
- 297, IRCCS Fondazione Don Carlo Gnocchi, Florence, Italy
- 298, Department of Psychiatry and Biobehavioral Science, Semel Institute for Neuroscience and Human Behavior, University of California Los Angeles, Los Angeles, California, US
- 299, David Geffen School of Medicine, University of California Los Angeles, Los Angeles, California, US
- 300, Department of Genetics, University of North Carolina at Chapel Hill, Chapel Hill, North Carolina, , US
- 301, Department of Psychiatry, University of Naples SUN, Naples, Italy
- 302, Department of Psychiatry, University of Perugia, Perugia, Italy
- 303, Brain Sciences Department, Stremble Ventures, Limassol, Cyprus
- 304, Pediatric Intensive Care Unit, P. & A. Kyriakou Children's Hospital, University of Athens, Athens, Greece
- 305, Faculty of Social and Behavioral Sciences, Utrecht University, Utrecht, The Netherlands
- 306, School of Psychology, Flinders University, Adelaide, Australia
- 307, School of Psychology, Curtin University, Perth, Australia
- 308, School of Paediatrics and Child Health, University of Western Australia, Perth, Australia
- 309, Helmholtz Centre Munich - German Research Center for Environmental Health, Munich, Germany
- 310, Department of Psychiatry, Faculty of Medicine, University of Toronto, Toronto, Canada
- 311, Toronto General Hospital, Toronto, Canada

- 312, Institute of Translational Genomics, Helmholtz Zentrum München, Neuherberg, Germany
- 313, Department of Internal Medicine VI, Psychosomatic Medicine and Psychotherapy, University Medical Hospital Tuebingen, Tuebingen, Germany
- 314, University of Edinburgh, Division of Psychiatry, Edinburgh, GB
- 315, Max Planck Institute of Psychiatry, Department of Translational Research in Psychiatry, Munich, DE
- 316, Virginia Commonwealth University, Department of Psychiatry, Richmond, VA, US
- 317, Vrije Universiteit Medical Center and GGZ inGeest, Department of Psychiatry, Amsterdam, NL
- 318, Emory University School of Medicine, Department of Psychiatry and Behavioral Sciences, Atlanta, GA, US
- 319, Karolinska Institutet, Department of Medical Epidemiology and Biostatistics, Stockholm, SE
- 320, University Hospital of Lausanne, Department of Psychiatry, Prilly, Vaud, CH
- 321, QIMR Berghofer Medical Research Institute, Genetics and Computational Biology, Brisbane, QLD, AU
- 322, Erasmus MC, Epidemiology, Rotterdam, Zuid-Holland, NL
- 323, Dokuz Eylul University School Of Medicine, Psychiatry, Izmir, TR
- 324, Central Institute of Mental Health, Medical Faculty Mannheim, Heidelberg University, Department of Genetic Epidemiology in Psychiatry, Mannheim, Baden-Württemberg, DE
- 325, F. Hoffmann-La Roche Ltd, Roche Product Development, Basel, CH
- 326, Kaiser Permanente Northern California, Division of Research, Oakland, CA, US
- 327, Columbia University College of Physicians and Surgeons, Psychiatry, New York, NY, US
- 328, University of British Columbia, Medical Genetics, Vancouver, BC, CA
- 329, University of British Columbia, Statistics, Vancouver, BC, CA
- 330, Virginia Commonwealth University, Virginia Institute for Psychiatric & Behavioral Genetics, Richmond, VA, US
- 331, Solid Biosciences , Boston, MA, US
- 332, Medical Center of the University of Munich, Campus Innenstadt, Institute of Psychiatric Phenomics and Genomics (IPPG), Munich, DE
- 333, National Cancer Institute, Division of Cancer Epidemiology and Genetics, Bethesda, MD, US
- 334, University of Glasgow, Institute of Health and Wellbeing, Glasgow, GB
- 335, University of Münster, Institute of Epidemiology and Social Medicine, Münster, Nordrhein-Westfalen, DE
- 336, University of Edinburgh, Medical Genetics Section, CGEM, IGMM, Edinburgh, GB
- 337, University Medicine Greifswald, Department of Psychiatry and Psychotherapy, Greifswald, Mecklenburg-Vorpommern, DE
- 338, University of Melbourne, Department of Psychiatry, Melbourne Medical School, Melbourne, AU
- 339, Vrije Universiteit Medical Center, Amsterdam Public Health Institute, Amsterdam, NL
- 340, Università degli Studi di Trento, Centre for Integrative Biology , Trento, Trentino-Alto Adige, IT
- 341, Faculty of Medicine, University of Freiburg, Department of Psychiatry and Psychotherapy, Medical Center, University of Freiburg, Freiburg, DE
- 342, Kaiser Permanente Northern California, Psychiatry, San Francisco, CA, US
- 343, University of Toronto, Department of Psychiatry, Toronto, ON, CA
- 344, University College London, Division of Psychiatry, London, GB
- 345, Janssen Research and Development, LLC, Neuroscience Therapeutic Area, Titusville, NJ, US
- 346, Erasmus MC, Child and Adolescent Psychiatry, Rotterdam, Zuid-Holland, NL
- 347, Erasmus MC, Psychiatry, Rotterdam, Zuid-Holland, NL
- 348, Dalhousie University, Psychiatry, Halifax, NS, CA
- 349, New York State Psychiatric Institute, Division of Epidemiology, New York, NY, US

- 350, Stanford University, Psychiatry & Behavioral Sciences, Stanford, CA, US
- 351, Krembil Research Institute, University Health Network, Toronto, Canada
- 352, Hospital for Sick Children, Toronto, Canada
- 353, University of Toronto, Toronto, Canada
- 354, University of California, San Francisco, CA, USA
- 355, University of Groningen, Groningen, the Netherlands
- 356, Yale University School of Medicine, New Haven, CT, USA
- 357, Department of Psychiatry and Behavioral Sciences, Johns Hopkins University, Baltimore, MD, USA
- 358, Centre National Maladie 'Syndrome Rare Gilles de la Tourette', Groupe Hospitalier Pitié-Salpêtrière, Paris, France
- 359, Assistance Publique-Hôpitaux de Paris, Département de Neurologie, Groupe Hospitalier Pitié-Salpêtrière, Paris, France
- 360, Sorbonne Universités, UPMC Université Paris 06, UMR S 1127, CNRS UMR 7225, ICM, Paris, France
- 361, De Bascule, Amsterdam, The Netherlands
- 362, Department of Child and Adolescent Psychiatry, Academic Medical Center, University of Amsterdam, Amsterdam, the Netherlands
- 363, Carver College of Medicine, University of Iowa, Iowa City, IA, USA
- 364, Sección de Neuropediatría, Instituto de Biomedicina de Sevilla, Hospital Universitario Virgen del Rocío/CSIC/Universidad de Sevilla, Seville, Spain
- 365, Yulius Academy, Yulius Mental Health Organization, Barendrecht, The Netherlands
- 366, Department of Psychiatry and UF Genetics Institute, University of Florida, Gainesville, FL, USA
- 367, McKnight Brain Institute, University of Florida, Gainesville, FL, USA
- 368, Unidad de Trastornos del Movimiento, Servicio de Neurología y Neurofisiología Clínica, Instituto de Biomedicina de Sevilla, Hospital Universitario Virgen del Rocío/CSIC/Universidad de Sevilla, Seville, Spain
- 369, Centro de Investigación Biomédica en Red sobre Enfermedades Neurodegenerativas (CIBERNED), Madrid, Spain
- 370, Department of Biological Sciences, Purdue University, West Lafayette, Indiana, USA
- 371, Department of Psychiatry, Yale School of Medicine, New Haven, CT, USA
- 372, Division of Neuropsychiatry, University College London, London, UK
- 373, Department of Child and Adolescent Psychiatry, Faculty of Medicine, Technische Universität Dresden, Dresden, Germany
- 374, Department of Psychiatry, University of Toronto, Toronto, Canada
- 375, University Health Network, University of Toronto, Toronto, Canada
- 376, Youthdale Treatment Centers, Toronto, Canada
- 377, Department of Neurology, Admiraal De Ruyter Hospital, Goes, The Netherlands
- 378, Mathison Centre for Mental Health Research & Education, Hotchkiss Brain Institute, Cumming School of Medicine, University of Calgary, Calgary, Canada
- 379, Departments of Psychiatry and Medical Genetics, Cumming School of Medicine, University of Calgary, Calgary, Canada
- 380, Program in Genetics and Genome Biology, Hospital for Sick Children, Toronto, Canada
- 381, Johns Hopkins University School of Medicine, Baltimore, MD, USA
- 382, Department of Psychiatry, University of Michigan, Ann Arbor, MI, USA
- 383, Clinical Research, Grupo Médico Carracci, Mexico City, Mexico
- 384, MRC Unit on Risk & Resilience in Mental Disorders, Department of Psychiatry, University of Cape Town, Cape Town, South Africa
- 385, National Institute of Genomic Medicine (INMEGEN), Ciudad de México, Mexico
- 386, Frederick W. Thompson Anxiety Disorders Centre, Sunnybrook Health Sciences Centre, Toronto, Canada
- 387, Groote Schuur Hospital, Cape Town, South Africa

- 388, Department of Psychiatry and Behavioral Sciences, Stanford University, Stanford, California 94305, USA
- 389, Clinical Neuroscience, Max Planck Institute of Experimental Medicine, Göttingen 37075, Germany
- 390, Department of Psychiatry, University of Iowa Carver College of Medicine, Iowa City, Iowa 52242, USA
- 391, University College London, London WC1E 6BT, UK
- 392, School of Nursing, Louisiana State University Health Sciences Center, New Orleans, Louisiana 70112, USA
- 393, Analytic and Translational Genetics Unit, Massachusetts General Hospital, Boston, Massachusetts 02114, USA
- 394, Department of Psychiatry, Icahn School of Medicine at Mount Sinai, New York, New York 10029, USA
- 395, Schizophrenia Research Institute, Sydney NSW 2010, Australia
- 396, Centre Hospitalier du Rouvray and INSERM U1079 Faculty of Medicine, 76301 Rouen, France
- 397, Institute of Mental Health, Singapore 539747, Singapore
- 398, Department of Psychiatry, Washington University, St. Louis, Missouri 63110, USA
- 399, Sheba Medical Center, Tel Hashomer 52621, Israel
- 400, Cognitive Genetics and Therapy Group, School of Psychology and Discipline of Biochemistry, National University of Ireland Galway, Co. Galway, Ireland
- 401, Department of Psychiatry and Behavioral Sciences, NorthShore University HealthSystem, Evanston, Illinois 60201, USA
- 402, Mental Health Service Line, Washington VA Medical Center, Washington DC 20422, USA
- 403, Department of Psychiatry, University of Colorado Denver, Aurora, Colorado 80045, USA
- 404, School of Electrical Engineering and Computer Science, University of Newcastle, Newcastle NSW 2308, Australia
- 405, Department of Psychiatry, Fujita Health University School of Medicine, Toyoake, Aichi, 470-1192, Japan
- 406, School of Psychiatry and Clinical Neurosciences, The University of Western Australia, Perth, WA 6009, Australia
- 407, Regional Centre for Clinical Research in Psychosis, Department of Psychiatry, Stavanger University Hospital, 4011 Stavanger, Norway
- 408, Priority Centre for Translational Neuroscience and Mental Health, University of Newcastle, Newcastle NSW 2300, Australia
- 409, The Zucker Hillside Hospital, Glen Oaks, New York 11004, USA
- 410, Department of Psychiatry, National University of Ireland Galway, Co. Galway, Ireland
- 411, Queensland Brain Institute, The University of Queensland, Brisbane QLD 4072, Australia
- 412, Department of Psychiatry, Royal College of Surgeons in Ireland, Dublin 2, Ireland
- 413, King's College London, London SE5 8AF, UK
- 414, Melbourne Neuropsychiatry Centre, University of Melbourne & Melbourne Health, Melbourne VIC 3053, Australia
- 415, Department of Psychiatry, University of Oxford, Oxford, OX3 7JX, UK
- 416, School of Biomedical Sciences and Pharmacy, University of Newcastle, Callaghan NSW 2308, Australia
- 417, School of Psychiatry and Clinical Neurosciences, The University of Western Australia, Perth WA 6009, Australia
- 418, Departments of Psychiatry and of Neuroscience and Physiology, SUNY Upstate Medical University, Syracuse, NY, USA
- 419, NORMENT, Div. of Mental Health and Addiction, University of Oslo, Oslo, Norway
- 420, Oslo University Hospital, Oslo, Norway
- 421, Neurogenetics Program, Departments of Neurology and Human Genetics, David Geffen School of Medicine, University of California, Los Angeles, Los Angeles, CA, USA



- 422, Center For Autism Research and Treatment, Semel Institute, David Geffen School of Medicine, University of California, Los Angeles, Los Angeles, CA, USA
- 423, Institute for Precision Health, University of California, Los Angeles, Los Angeles, CA, USA
- 424, Department of Psychiatry, Virginia Commonwealth University, Richmond, VA, USA
- 425, Instituto de Salud Carlos III, Biomedical Network Research Centre on Mental Health (CIBERSAM), Barcelona, Spain
- 426, Department of Genetics and Human Genetics Institute, Rutgers University, Piscataway, New Jersey 08854
- 427, Lancaster Data Science Institute and Medical School, Lancaster University, Bailrigg, UK, LA1 4YG
- 428, Department of Child and Adolescent Psychiatry and Psychotherapy, University Hospital of Psychiatry Zurich, University of Zurich, Zurich, Switzerland
- 429, Department of Psychiatry, Massachusetts General Hospital and Harvard Medical School, Boston, MA, USA
- 430, Division of Neurology, Cincinnati Children's Hospital Medical Center; Department of Pediatrics, University of Cincinnati College of Medicine, Cincinnati, OH USA
- 431, Stark Neurosciences Research Institute, Departments of Psychiatry and Medical and Molecular Genetics, Indiana University School of Medicine, Indianapolis, IN, USA
- 432, Department of Neurology, Massachusetts General Hospital, Harvard Medical School, Boston, MA, USA
- 433, Department of Psychiatry, Tufts University School of Medicine, Boston, MA, USA
- 434, Institute of Human Genetics, Hannover Medical School, Hannover, Germany
- 435, Section of Genetic Medicine, Institute for Genomics and Systems Biology, University of Chicago
- 436, Molecular Horizons and School of Chemistry and Molecular Bioscience, University of Wollongong, NSW 2522, Australia
- 437, Illawarra Health & Medical Research Institute, Wollongong, NSW 2522, Australia
- 438, NORMENT, Department of Clinical Science, University of Bergen, Bergen, Norway
- 439, Laboratory of Neuropsychiatry, IRCCS Santa Lucia Foundation, Rome, Italy
- 440, Vrije Universiteit Amsterdam, Dept of Biological Psychology & Amsterdam Public Health: Personalized Medicine
- 441, Department of Psychiatry and Psychotherapy, University of Münster, Münster, Germany
- 442, Zentren für Seelische Gesundheit, BBRZ-Med
- 443, Departments of Molecular Physiology & Biophysics and Psychiatry, Vanderbilt University, Nashville, TN, USA
- 444, Department of Psychiatry and Psychotherapy, University of Cologne, Cologne, Germany
- 445, Department of Psychiatry and Psychotherapy, University of Munich, Munich, Germany
- 446, Department of Neurology, Klinikum rechts der Isar, Technical University of Munich, Munich, Germany
- 447, Center for Data Driven Discovery in Biomedicine, Children's Hospital of Philadelphia, Philadelphia, PA, USA.
- 448, Institute of Psychiatry, Psychology and Neuroscience, King's College London, London, GB
- 449, Division of Health Data and Digitalisation, Norwegian Institute of Public Health, Oslo, Norway
- 450, Department of Clinical Nutrition, Institute of Public Health and Clinical Nutrition, University of Eastern Finland, Kuopio, Finland
- 451, Oxford Health NHS Foundation Trust, Warneford Hospital, Oxford, UK, OX3 7JX
- 452, Faculty of Medical & Health Sciences, University of Auckland, New Zealand
- 453, Department of Medicine, Division of Genetic Medicine, Vanderbilt University Medical Center, Nashville, TN
- 454, Wuxi Mental Health Center of Najing Medical University, 156 Qianrong Road, Wuxi, Jiangsu Province, 214151, China

- 455, Department of Clinical Neuroscience, Centre for Psychiatric Research, Karolinska Institutet & Stockholm Health Care Services, Stockholm County Council, Stockholm, Sweden
- 456, NORMENT, Institute of Clinical Medicine, Psychiatry section, University of Oslo, Norway
- 457, Department of Clinical and Experimental Medicine, Catania University, Italy
- 458, Department of Psychiatry and Biobehavioral Sciences, University of California at Los Angeles
- 459, Center for Genomic Medicine and Department of Psychiatry, Massachusetts General Hospital, Boston, Massachusetts 02114, USA
- 460, Northwell Health, New York City, NY, USA
- 461, Lifespan Changes in Brain and Cognition (LCBC), Department of Psychology, University of Oslo
- 462, NORMENT and KG Jebsen Center for neuropsychiatric disorders, Division of psychiatry, Haukeland University Hospital and Department of Clinical Medicine, University of Bergen, Norway
- 463, PRC for Health Behaviour, School of Medicine and Public Health, University of Newcastle, Callaghan NSW 2308, Australia
- 464, New York University (NYU) Langone Medical Center, New York City, NY, USA
- 465, University of Miami Health System, Miami, FL, USA
- 466, Hospital Clinic de Barcelona, Barcelona, Spain
- 467, Child and Adolescent Mental Health Center, Mental Health Services – Capital Region of Denmark, Denmark
- 468, Guy's and Saint Thomas' NHS Foundation Trust, King's College London, London, GB
- 469, Rutgers, The State University of New Jersey, New Brunswick, NJ, USA
- 470, Columbia University, New York, NY, USA
- 471, Sarah Lawrence College, Bronxville, NY, USA
- 472, Boston University, Boston, MA, USA
- 473, Hallym University Suicide and School Mental Health Institute, Hallym University, Sacred Heart Hospital, Anyang, South Korea
- 474, Yonsei University College of Medicine, Seodaemun-gu, Seoul, South Korea
- 475, National Health Insurance Corporation Ilsan Hospital, Goyang, South Korea
- 476, University of California Medical Center, San Francisco, CA, USA
- 477, Korea Institute for Children's Social Development, Seoul, Republic of Korea
- 478, University of Cologne, Cologne, Germany
- 479, Kangbuk Samsung Medical Center, Seoul, South Korea
- 480, Severance Hospital, Seoul, South Korea
- 481, Great Ormond Street Hospital For Children NHS Trust, King's College London, London, GB
- 482, University Hospital Schleswig-Holstein, University of Luebeck, Lübeck, Germany
- 483, Capital Region Psychiatry, University of Lausanne, Child and Adolescent Mental Health Centre Capital, Region, University of Copenhagen, Copenhagen, Denmark
- 484, Yonsei University College of Medicine, Seoul, South Korea
- 485, Catholic University of Korea, Seoul, South Korea
- 486, University of Luebeck, Lübeck, Germany
- 487, University of California San Diego, San Diego, CA, USA
- 488, Jane and Terry Semel Institute for Neuroscience and Human Behavior, Los Angeles, CA
- 489, Baylor College of Medicine, Houston, TX, USA
- 490, CHU Sainte Justine, Neurology, University of Montreal, Canada
- 491, Universitat de Barcelona Facultat de Medicina, Barcelona, Spain
- 492, Medical School Hannover (MHH), Hannover, Germany
- 493, University of California Berkeley, Berkeley, CA, USA
- 494, Department of Child and Adolescent Psychiatry, Sorbonne Universities, Paris, France
- 495, Institut d'Investigacions Biomèdiques August Pi i Sunyer (IDIBAPS)
- 496, University of Utah, Salt Lake City, UT, USA

497, Virginia Commonwealth University, Richmond, VA, USA

## **AUTHOR CONTRIBUTIONS**

*Writing Group:* P.H.L., Y.A.F., V.A., S.V.F., B.M.N., K.S.M., L.T., S.R., N.W., M.N., G.B., J.W., J.S., H.E., J.G., O.A., M.B.S., C.A.M., A.F., S.S., M.M., A.Z., A.B., K.S.K., J.W.S. (Chair). *Analysis Group:* P.H.L. (Lead), V.A., H.W., Y.A.F., J.R., Z.Z., E.T-D., M.G.N., A.D.G., D.P., M, M-J, W. Disorder-specific data collection, analysis, and identification of duplicate subjects were conducted by D.Y., S.R., E.S., R.A., R.W., D.M., M.M., A.B., 23andme, and L.E.D. *Editorial Revisions Group:* S.B., J.L., H.K., A.K., E.H.C., G.K., G.C., J.K., C.C.Z., P.J.H., T.B., L.A.R., B.F., J.I.N. The remaining authors contributed to the recruitment, genotyping, or data processing for the contributing components of the study. All other authors saw, had the opportunity to comment on, and approved the final draft.

## **ACKNOWLEDGMENTS**

Full acknowledgements and a list of funding are in the Supplementary Note. The work of the contributing groups was supported by numerous grants from governmental and charitable bodies as well as philanthropic donation. Specifically, P.H.L. (R00MH101367) and J.W.S. (R01MH106547; R01MH117599; U01HG008685). We thank the research participants and employees of 23andMe, Inc. for their contribution to this study.

## **DECLARATIONS OF INTERESTS**

J.W.S. is an unpaid member of the Bipolar/Depression Research Community Advisory Panel of 23andMe. HRK (Henry R. Kranzler) is a member of the American Society of Clinical Psychopharmacology's Alcohol Clinical Trials Initiative, which was supported in the last three years by AbbVie, Alkermes, Ethypharm, Indivior, Lilly, Lundbeck, Otsuka, Pfizer, Arbor, and Amygdala Neurosciences. HRK and JG (Joel Gelernter) are named as inventors on PCT patent application #15/878,640 entitled: "Genotype-guided dosing of opioid agonists," filed January 24, 2018. BMN (Benjamin M Neale) is a member of the Deep Genomics Scientific Advisory Board, a consultant for Camp4 Therapeutics Corporation, a consultant for Merck & Co., a consultant for Avanir Pharmaceuticals, Inc, and a consultant for Takeda Pharmaceutical. KMV (Kirsten Müller-Vahl) has nonfinancial competing interests as a member of the TAA medical advisory board, the scientific advisory board of the German Tourette Association TGD, the board of directors of the German (ACM) and the International (IACM) Association for Cannabinoid Medicines, and the committee of experts for narcotic drugs at the federal opium bureau of the Federal Institute for Drugs and Medical Devices (BfArM) in Germany; has received financial or material research support from the EU (FP7-HEALTH-2011 No. 278367, FP7-PEOPLE-2012-ITN No. 316978), the German Research Foundation (DFG: GZ MU 1527/3-1), the German Ministry of Education and

Research (BMBF: 01KG1421), the National Institute of Mental Health (NIMH), the Tourette Gesellschaft Deutschland e.V., the Else-Kroner-Fresenius-Stiftung, and GW, Almirall, Abide Therapeutics, and Therapix Biosciences; has served as a guest editor for *Frontiers in Neurology* on the research topic “The neurobiology and genetics of Gilles de la Tourette syndrome: new avenues through large-scale collaborative projects”, is an associate editor for “Cannabis and Cannabinoid Research” and an Editorial Board Member of “Medical Cannabis and Cannabinoids”; has received consultant's honoraria from Abide Therapeutics, Fundacion Canna, Therapix Biosciences and Wayland Group, speaker's fees from Tilray, and royalties from Medizinisch Wissenschaftliche Verlagsgesellschaft Berlin, and is a consultant for Zynerba Pharmaceuticals. JIN has been an investigator for Assurex and is currently an investigator for Janssen. BF has received educational speaking fees from Medice and Shire. The other authors declare no competing interests.



## REFERENCES

Barban, N., Jansen, R., de Vlaming, R., Vaez, A., Mandemakers, J.J., Tropf, F.C., Shen, X., Wilson, J.F., Chasman, D.I., Nolte, I.M., *et al.* (2016). Genome-wide analysis identifies 12 loci influencing human reproductive behavior. *Nat Genet* 48, 1462-1472.

Baurecht, H., Hotze, M., Brand, S., Buning, C., Cormican, P., Corvin, A., Ellinghaus, D., Ellinghaus, E., Esparza-Gordillo, J., Folster-Holst, R., *et al.* (2015). Genome-wide comparative analysis of atopic dermatitis and psoriasis gives insight into opposing genetic mechanisms. *Am J Hum Genet* 96, 104-120.

Bendriem, R.M., and Ross, M.E. (2017). Wiring the Human Brain: A User's Handbook. *Neuron* 95, 482-485.

Benner, C., Spencer, C., Havulinna, A., Salomaa, V., Ripatti, S., and Pirinen, M. (2016). FINEMAP: efficient variable selection using summary data from genome-wide association studies. *Bioinformatics* 32, 1493-1501.

Berndt, S.I., Gustafsson, S., Magi, R., Ganna, A., Wheeler, E., Feitosa, M.F., Justice, A.E., Monda, K.L., Croteau-Chonka, D.C., Day, F.R., *et al.* (2013). Genome-wide meta-analysis identifies 11 new loci for anthropometric traits and provides insights into genetic architecture. *Nat Genet* 45, 501-512.

Bhattacharjee, S., Rajaraman, P., Jacobs, K.B., Wheeler, W.A., Melin, B.S., Hartge, P., GliomaScan, C., Yeager, M., Chung, C.C., Chanock, S.J., *et al.* (2012). A subset-based approach improves power and interpretation for the combined analysis of genetic association studies of heterogeneous traits. *Am J Hum Genet* 90, 821-835.

Bipolar Disorder and Schizophrenia Working Group of the Psychiatric Genomics Consortium (2018). Genomic dissection of bipolar disorder and schizophrenia, including 28 subphenotypes. *Cell* 173, 1705-1715.

Boyle, A., Hong EL, Hariharan M, Cheng Y, Schaub MA, Kasowski M, Karczewski KJ, Park J, Hitz BC, Weng S, Cherry JM, Snyder M. (2012). Annotation of functional variation in personal genomes using RegulomeDB. *Genome Res* 22, 1790-1797.

Brainstorm Consortium (2018). Analysis of shared heritability in common disorders of the brain. *Science* 360, eaap8757.

Bulik-Sullivan, B., Finucane, H.K., Anttila, V., Gusev, A., Day, F.R., Loh, P.R., ReproGen, C., Psychiatric Genomics, C., Genetic Consortium for Anorexia Nervosa of the Wellcome Trust Case Control, C., Duncan, L., *et al.* (2015a). An atlas of genetic correlations across human diseases and traits. *Nat Genet* 47, 1236-1241.

Bulik-Sullivan, B.K., Loh, P.R., Finucane, H.K., Ripke, S., Yang, J., Schizophrenia Working Group of the Psychiatric Genomics, C., Patterson, N., Daly, M.J., Price, A.L., and Neale, B.M. (2015b). LD Score regression distinguishes confounding from polygenicity in genome-wide association studies. *Nat Genet* 47, 291-295.

Caspi, A., Houts, R.M., Belsky, D.W., Goldman-Mellor, S.J., Harrington, H., Israel, S., Meier, M.H., Ramrakha, S., Shalev, I., Poulton, R., *et al.* (2014). The p Factor: One General Psychopathology Factor in the Structure of Psychiatric Disorders? *Clin Psychol Sci* 2, 119-137.

Cross-Disorder Group of the Psychiatric Genomics Consortium (2013). Genetic relationship between five psychiatric disorders estimated from genome-wide SNPs. *Nat Genet* 45, 984-994.

Cross-Disorder Group of the Psychiatric Genomics Consortium (2013). Identification of risk loci with shared effects on five major psychiatric disorders: a genome-wide analysis. *Lancet* 381, 1371-1379.

Darmanis, S., Sloan, S., Zhang, Y., Enge, M., Caneda, C., Shuer, L., Hayden Gephart, M., Barres, B., and Quake, S. (2015). A survey of human brain transcriptome diversity at the single cell level. *Proc Natl Acad Sci* 112, 7285-7290.

Davydov, E., Goode, D., Sirota, M., Cooper, G., Sidow, A., and Batzoglou, S. (2010). Identifying a high fraction of the human genome to be under selective constraint using GERP++. *PLoS Comput Biol* 6, e1001025.

Dayem, U.A., Oscanoa, J., Wang, J., Nagano, A., Lemoine, N., and Chelala, C. (2018). SNPnexus: assessing the functional relevance of genetic variation to facilitate the promise of precision medicine. *Nucleic Acids Res* 46, W109-W113.

de Leeuw, C., Mooij, J., Heskes, T., and Posthuma, D. (2015). MAGMA: Generalized Gene-Set Analysis of GWAS Data. *PLoS Comput Biol* 11, e1004219.

Demontis, D., Walters, R.K., Martin, J., Mattheisen, M., Als, T.D., Agerbo, E., Baldursson, G., Belliveau, R., Bybjerg-Grauholm, J., Baekvad-Hansen, M., *et al.* (2019). Discovery of the first genome-wide significant risk loci for attention deficit/hyperactivity disorder. *Nat Genet* 51, 63-75.

Duncan, L., Yilmaz, Z., H, G., Walters, R., Goldstein, J., Anttila, V., Bulik-Sullivan, B., Ripke, S., Consortium, E.D.W.G.o.t.P.G., Thornton, L., *et al.* (2017). Significant Locus and Metabolic Genetic Correlations Revealed in Genome-Wide Association Study of Anorexia Nervosa. *Am J Psychiatry* 174.

Duncan, L.E., Ratanatharathorn, A., Aiello, A.E., Almli, L.M., Amstadter, A.B., Ashley-Koch, A.E., Baker, D.G., Beckham, J.C., Bierut, L.J., Bisson, J., *et al.* (2018). Largest GWAS of PTSD (N=20 070) yields genetic overlap with schizophrenia and sex differences in heritability. *Mol Psychiatry* 23, 666-673.

Fernandez-Castillo, N., Gan, G., van Donkelaar, M.M.J., Vaht, M., Weber, H., Retz, W., Meyer-Lindenberg, A., Franke, B., Harro, J., Reif, A., *et al.* (2017). RBF1, encoding a splicing regulator, is a candidate gene for aggressive behavior. *Eur Neuropsychopharmacol*.

Global Burden of Disease Injury Incidence Prevalence Collaborators (2017). Global, regional, and national incidence, prevalence, and years lived with disability for 328

diseases and injuries for 195 countries, 1990-2016: a systematic analysis for the Global Burden of Disease Study 2016. *Lancet* 390, 1211-1259.

Gorsuch, R. (1988). Exploratory Factor Analysis. In *Handbook of Multivariate Experimental Psychology Perspectives on Individual Differences*, J.R. Nesselrode, and R.B. Cattell, eds. (Boston, MA: Springer), pp. 231-258.

Goyette, P., Boucher, G., Mallon, D., Ellinghaus, E., Jostins, L., Huang, H., Ripke, S., Gusareva, E.S., Annese, V., Hauser, S.L., *et al.* (2015). High-density mapping of the MHC identifies a shared role for HLA-DRB1\*01:03 in inflammatory bowel diseases and heterozygous advantage in ulcerative colitis. *Nat Genet* 47, 172-179.

Grantyn, R., and Grantyn, A. (1973). Postsynaptic responses of hippocampal neurons to mesencephalic stimulation: depolarizing potentials and discharge patterns. *Brain Res* 53, 55-69.

Grotzinger, A., Rhemtulla, M., de Vlaming, R., Ritchie, S., Mallard, T., Hill, W., Ip HF, McIntosh, A., Deary, I.J., Koellinger, P.D., *et al.* (2018). Genomic SEM provides insights into the multivariate genetic architecture of complex traits. *BiorXiv doi: <https://doi.org/10.1101/305029>*.

Grove, J., Ripke, S., Als, T.D., Mattheisen, M., Walters, R., Won, H., Pallesen, J., Agerbo, E., Andreassen, O.A., Anney, R., *et al.* (2017). Common risk variants identified in autism spectrum disorder. *bioRxiv*.

Hamada, N., Ito, H., Iwamoto, I., Morishita, R., Tabata, H., and Nagata, K. (2015). Role of the cytoplasmic isoform of RBFOX1/A2BP1 in establishing the architecture of the developing cerebral cortex. *Mol Autism* 6, 56.

Hamada, N., Ito, H., Nishijo, T., Iwamoto, I., Morishita, R., Tabata, H., Momiyama, T., and Nagata, K. (2016). Essential role of the nuclear isoform of RBFOX1, a candidate gene for autism spectrum disorders, in the brain development. *Sci Rep* 6, 30805.

Han, B., and Eskin, E. (2012). Interpreting meta-analyses of genome-wide association studies. *PLoS Genet* 8, e1002555.

Hartwig, F.P., Bowden, J., Loret de Mola, C., Tovo-Rodrigues, L., Davey Smith, G., and Horta, B.L. (2016). Body mass index and psychiatric disorders: a Mendelian randomization study. *Sci Rep* 6, 32730.

Hill, W., and Zhang, X. (2012). Assessing pleiotropy and its evolutionary consequences: pleiotropy is not necessarily limited, nor need it hinder the evolution of complexity. *Nat Rev Genet* 13, 296.

Hoops, D., and Flores, C. (2017). Making Dopamine Connections in Adolescence. *Trends Neurosci* 40, 709-719.

Horton, J.R., Upadhyay, A.K., Qi, H.H., Zhang, X., Shi, Y., and Cheng, X. (2010). Enzymatic and structural insights for substrate specificity of a family of jumonji histone lysine demethylases. *Nat Struct Mol Biol* 17, 38-43.

Howie, B., Marchini, J., and Stephens, M. (2011). Genotype imputation with thousands of genomes. *G3: Genes, Genomes, Genetics* 1, 457-470.

Hyde, C., Nagle MW, Tian C, Chen X, Paciga SA, Wendland JR, Tung JY, Hinds DA, Perlis RH, Winslow AR. (2016). Identification of 15 genetic loci associated with risk of major depression in individuals of European descent. *Nat Genet* 48, 1031-1036.

International League Against Epilepsy Consortium on Complex Epilepsies. Electronic address, e.-a.u.e.a. (2014). Genetic determinants of common epilepsies: a meta-analysis of genome-wide association studies. *Lancet Neurol* 13, 893-903.

International Obsessive Compulsive Disorder Foundation Genetics Collaborative (IOCDF-GC) and OCD Collaborative Genetics Association Studies (OCGAS) (2018). Revealing the complex genetic architecture of obsessive compulsive disorder using meta-analysis. *Mol Psychiatry* 23, 1181-1188.

Jamuar, S.S., Schmitz-Abe, K., D'Gama, A.M., Drottar, M., Chan, W.M., Peeva, M., Servattalab, S., Lam, A.N., Delgado, M.R., Clegg, N.J., *et al.* (2017). Biallelic mutations in human DCC cause developmental split-brain syndrome. *Nat Genet* 49, 606-612.

Jones, S.E., Tyrrell, J., Wood, A.R., Beaumont, R.N., Ruth, K.S., Tuke, M.A., Yaghootkar, H., Hu, Y., Teder-Laving, M., Hayward, C., *et al.* (2016). Genome-Wide Association Analyses in 128,266 Individuals Identifies New Morningness and Sleep Duration Loci. *PLoS Genet* 12, e1006125.

Kessler, R.C., and Wang, P.S. (2008). The descriptive epidemiology of commonly occurring mental disorders in the United States. *Annual review of public health* 29, 115-129.

Kiezun, A., Pulit, S., Francioli, L., van Dijk, F., Swertz, M., Boomsma, D., van Duijn, C., Slagboom, P., van Ommen, G., Wijmenga, C., *et al.* (2013). Deleterious alleles in the human genome are on average younger than neutral alleles of the same frequency. *PLoS Genet* 9, e1003301.

Kircher, M., Witten DM, Jain P, O'Roak BJ, Cooper GM, Shendure J. (2014). A general framework for estimating the relative pathogenicity of human genetic variants. *Nat Genet* 46, 310-315.

Kuroda, J., Ago, T., Nishimura, A., Nakamura, K., Matsuo, R., Wakisaka, Y., Kamouchi, M., and Kitazono, T. (2014). Nox4 is a major source of superoxide production in human brain pericytes. *J Vasc Res* 51, 429-438.

Lambert, J.C., Ibrahim-Verbaas, C.A., Harold, D., Naj, A.C., Sims, R., Bellenguez, C., DeStafano, A.L., Bis, J.C., Beecham, G.W., Grenier-Boley, B., *et al.* (2013). Meta-analysis of 74,046 individuals identifies 11 new susceptibility loci for Alzheimer's disease. *Nat Genet* 45, 1452-1458.

Lettre, G., and Rioux, J.D. (2008). Autoimmune diseases: insights from genome-wide association studies. *Hum Mol Genet* 17, R116-121.

Lin, D.-Y., and Sullivan, P. (2009). Meta-Analysis of Genome-wide Association Studies with Overlapping Subjects. *Am J Hum Genet* 85, 862-872.

Liu, J.Z., van Sommeren, S., Huang, H., Ng, S.C., Alberts, R., Takahashi, A., Ripke, S., Lee, J.C., Jostins, L., Shah, T., *et al.* (2015). Association analyses identify 38 susceptibility loci for inflammatory bowel disease and highlight shared genetic risk across populations. *Nat Genet* 47, 979-986.

Liu, Y., Bhowmick, T., Liu, Y., Gao, X., Mertens, H.D.T., Svergun, D.I., Xiao, J., Zhang, Y., Wang, J.H., and Meijers, R. (2018). Structural Basis for Draxin-Modulated Axon Guidance and Fasciculation by Netrin-1 through DCC. *Neuron* 97, 1261-1267 e1264.

Lopresti, A.L., and Drummond, P.D. (2013). Obesity and psychiatric disorders: commonalities in dysregulated biological pathways and their implications for treatment. *Prog Neuropsychopharmacol Biol Psychiatry* 45, 92-99.

Malik, R., Traylor, M., Pulit, S.L., Bevan, S., Hopewell, J.C., Holliday, E.G., Zhao, W., Abrantes, P., Amouyel, P., Attia, J.R., *et al.* (2016). Low-frequency and common genetic variation in ischemic stroke: The METASTROKE collaboration. *Neurology* 86, 1217-1226.

Marsh, A.P., Heron, D., Edwards, T.J., Quartier, A., Galea, C., Nava, C., Rastetter, A., Moutard, M.L., Anderson, V., Bitoun, P., *et al.* (2017). Mutations in DCC cause isolated agenesis of the corpus callosum with incomplete penetrance. *Nat Genet* 49, 511-514.

Milaneschi, Y., Simmons, W.K., van Rossum, E.F.C., and Penninx, B.W. (2018). Depression and obesity: evidence of shared biological mechanisms. *Mol Psychiatry* [Epub ahead of print].

Nikpay, M., Goel, A., Won, H.H., Hall, L.M., Willenborg, C., Kanoni, S., Saleheen, D., Kyriakou, T., Nelson, C.P., Hopewell, J.C., *et al.* (2015). A comprehensive 1,000 Genomes-based genome-wide association meta-analysis of coronary artery disease. *Nat Genet* 47, 1121-1130.

Okbay, A., Baselmans, B.M., De Neve, J.E., Turley, P., Nivard, M.G., Fontana, M.A., Meddens, S.F., Linner, R.K., Rietveld, C.A., Derringer, J., *et al.* (2016). Genetic variants associated with subjective well-being, depressive symptoms, and neuroticism identified through genome-wide analyses. *Nat Genet* 48, 624-633.

Otowa, T., Hek, K., Lee, M., Byrne, E.M., Mirza, S.S., Nivard, M.G., Bigdeli, T., Aggen, S.H., Adkins, D., Wolen, A., *et al.* (2016). Meta-analysis of genome-wide association studies of anxiety disorders. *Mol Psychiatry* 21, 1485.

Pollard, K., Hubisz, M., Rosenbloom, K., and Siepel, A. (2010). Detection of nonneutral substitution rates on mammalian phylogenies. *Genome Res* 20, 110-121.

Purcell, S., Neale, B., Todd-Brown, K., Thomas, L., Ferreira, M.A., Bender, D., Maller, J., Sklar, P., de Bakker, P.I., Daly, M.J., *et al.* (2007). PLINK: a toolset for whole-genome association and population-based linkage analysis. *Am J Hum Genet* 81, 559-575.



Qi, H.H.S., M.;Hu, G.Q.;Wang, Z.;Bhattacharjee, A.;Gordon, D.B.;Gonzales, M., Lan, F.O., P.P.;Huarte, M.;Yaghi N.K.; Lim, H.;Garcia, B.A.;Brizuela, L.;Zhao, K.;Roberts, T.M., and Shi, Y. (2010). Histone H4K20/H3K9 demethylase PHF8 regulates zebrafish brain and craniofacial development. *Nature* 466, 503-507.

Reynolds, L.M., Pokinko, M., Torres-Berrio, A., Cuesta, S., Lambert, L.C., Del Cid Pellitero, E., Wodzinski, M., Manitt, C., Krimpenfort, P., Kolb, B., *et al.* (2018). DCC Receptors Drive Prefrontal Cortex Maturation by Determining Dopamine Axon Targeting in Adolescence. *Biol Psychiatry* 83, 181-192.

Rice, F., Riglin, L., Thapar, A.K., Heron, J., Anney, R., O'Donovan, M.C., and Thapar, A. (2018). Characterizing Developmental Trajectories and the Role of Neuropsychiatric Genetic Risk Variants in Early-Onset Depression. *JAMA Psychiatry*.

Schizophrenia Working Group of the Psychiatric Genomics, C. (2014). Biological insights from 108 schizophrenia-associated genetic loci. *Nature* 511, 421-427.

Schmitt, J., Schwarz, K., Baurecht, H., Hotze, M., Folster-Holst, R., Rodriguez, E., Lee, Y.A.E., Franke, A., Degenhardt, F., Lieb, W., *et al.* (2016). Atopic dermatitis is associated with an increased risk for rheumatoid arthritis and inflammatory bowel disease, and a decreased risk for type 1 diabetes. *J Allergy Clin Immunol* 137, 130-136.

Schork, A.J., Won, H., Appadurai, V., Nudel, R., Gandal, M., Delaneau, O., Hougaard, D., Baekved-Hansen, M., Bybjerg-Grauholm, J., Pedersen, M.G., *et al.* (2017). A genome-wide association study for shared risk across major psychiatric disorders in a nation-wide birth cohort implicates fetal neurodevelopment as a key mediator. *bioRxiv*.

Siepel, A., Bejerano, G., Pedersen, J., Hinrichs, A., Hou, M., Rosenbloom, K., Clawson, H., Spieth, J., Hillier, L., Richards, S., *et al.* (2005). Evolutionarily conserved elements in vertebrate, insect, worm, and yeast genomes. *Genome Res* 15, 1034-1050.

Smoller, J.W., Andreassen, O.A., Edenberg, H.J., Faraone, S.V., Glatt, S.J., and Kendler, K.S. (2018). Psychiatric genetics and the structure of psychopathology. *Mol Psychiatry* [Epub ahead of print].

Solovieff, N., Cotsapas, C., Lee, P.H., Purcell, S.M., and Smoller, J.W. (2013). Pleiotropy in complex traits: challenges and strategies. *Nat Rev Genet* 14, 483-495.

Stahl, E., Breen, G., Forstner, A., McQuillin, A., Ripke, S., Cichon, S., Scott, L., Ophoff, R., Andreassen, O.A., Kelsoe, J., *et al.* (2018). Genomewide association study identifies 30 loci associated with bipolar disorder. *bioRxiv*, 173062.

Sullivan, P.F., Agrawal, A., Bulik, C.M., Andreassen, O.A., Borglum, A.D., Breen, G., Cichon, S., Edenberg, H.J., Faraone, S.V., Gelernter, J., *et al.* (2018). Psychiatric Genomics: An Update and an Agenda. *Am J Psychiatry* 175, 15-27.

Topchiy, E., Panzhinskiy, E., Griffin, W.S., Barger, S.W., Das, M., and Zawada, W.M. (2013). Nox4-generated superoxide drives angiotensin II-induced neural stem cell proliferation. *Dev Neurosci* 35, 293-305.

Tsukada, Y., Ishitani, T., and Nakayama, K.I. (2010). KDM7 is a dual demethylase for histone H3 Lys 9 and Lys 27 and functions in brain development. *Genes Dev* 24, 432-437.

Turley, P., Walters, R., Maghzian, O., Okbay, A., Lee, J., Fontana, M., Nguyen-Viet, T., Wedow, R., Zacher, M., Furlotte, N., *et al.* (2018). Multi-trait analysis of genome-wide association summary statistics using MTAG. *Nat Genet* 50, 229-237.

Vosberg, D.E., Zhang, Y., Menegaux, A., Chalupa, A., Manitt, C., Zehntner, S., Eng, C., DeDuck, K., Allard, D., Durand, F., *et al.* (2018). Mesocorticolimbic Connectivity and Volumetric Alterations in DCC Mutation Carriers. *J Neurosci* 38, 4655-4665.

Wang, D., Liu, S., Warrell, J., Won, H., Shi, X., Navarro, F.C.P., Clarke, D., Gu, M., Emani, P., Yang, Y.T., *et al.* (2018). Comprehensive functional genomic resource and integrative model for the human brain. *Science* 362.

Wang, K., Li, M., and Hakonarson, H. (2010). ANNOVAR: functional annotation of genetic variants from high-throughput sequencing data. *Nucleic Acids Res* 38, e164.

Watanabe, K., Taskesen, E., van Bochoven, A., and Posthuma, D. (2017). Functional mapping and annotation of genetic associations with FUMA. *Nat Commun* 8, 1826.

Won, H., de la Torre-Ubieta, L., Stein, J.L., Parikshak, N.N., Huang, J., Opland, C.K., Gandal, M.J., Sutton, G.J., Hormozdiari, F., Lu, D., *et al.* (2016). Chromosome conformation elucidates regulatory relationships in developing human brain. *Nature* 538, 523-527.

Woo, D., Falcone, G.J., Devan, W.J., Brown, W.M., Biffi, A., Howard, T.D., Anderson, C.D., Brouwers, H.B., Valant, V., Battey, T.W., *et al.* (2014). Meta-analysis of genome-wide association studies identifies 1q22 as a susceptibility locus for intracerebral hemorrhage. *Am J Hum Genet* 94, 511-521.

Wood, A.R., Esko, T., Yang, J., Vedantam, S., Pers, T.H., Gustafsson, S., Chu, A.Y., Estrada, K., Luan, J., Kutalik, Z., *et al.* (2014). Defining the role of common variation in the genomic and biological architecture of adult human height. *Nat Genet* 46, 1173-1186.

Wray, N.R., Ripke, S., Mattheisen, M., Trzaskowski, M., Byrne, E.M., Abdellaoui, A., Adams, M.J., Agerbo, E., Air, T.M., Andlauer, T.M.F., *et al.* (2018). Genome-wide association analyses identify 44 risk variants and refine the genetic architecture of major depression. *Nat Genet* 50, 668-681.

Yang, J., Ferreira, T., Morris, A.P., Medland, S.E., Madden, P.A., Heath, A.C., Martin, N.G., Montgomery, G.W., Weedon, M.N., Loos, R.J., *et al.* (2012). Conditional and joint multiple-SNP analysis of GWAS summary statistics identifies additional variants influencing complex traits. *Nature genetics* 44, 369-375, S361-363.

Yu, D., Sul, J.H., Tsetsos, F., Nawaz, M.S., Huang, A.Y., Zelaya, I., Illmann, C., Osiecki, L., Darrow, S.M., Hirschtritt, M.E., *et al.* (In press.). Interrogating the genetic

determinants of Tourette syndrome and other tic disorders through genome-wide association studies. *Am J Psychiatry*.

Zheng, J., Erzurumluoglu, A., Elsworth, B., Kemp, J., Howe, L., Haycock, P., Hemani, G., Tansey, K., Laurin, C., Early Genetics and Lifecourse Epidemiology (EAGLE) Eczema Consortium, *et al.* (2017). LD Hub: a centralized database and web interface to perform LD score regression that maximizes the potential of summary level GWAS data for SNP heritability and genetic correlation analysis. *Bioinformatics* 33, 272-279.

Zhu, Z., Anttila, V., Smoller, J.W., and Lee, P.H. (2018). Statistical power and utility of meta-analysis methods for cross-phenotype genome-wide association studies. *PLoS One* 13, e0193256.

## Supplementary Figure Titles and Legends

**Figure S1. Hierarchical clustering of genetic architecture across eight neuropsychiatric disorders. (Related to Table S3)** Hierarchical clustering revealed three sub-groups within the eight disorders. Results were very similar to those obtained using exploratory factor analysis and genomic structural equation modeling.

**Figure S2. P-M plots for top 146 loci. (Related to Figure 3 and Table S5)** M-values were generated for each locus for each disorder and indicate the presence or absence of a disorder-specific effect. M-values were plotted with the negative log odds of the corresponding p-values for each disorder for a given SNP; P-M plots were generated for each of the top 146 loci. Log odds ratios for the effect of the SNP on each disorder and a summary across disorders was also plotted. As expected, most of the top SNPs (109/146) were pleiotropic.

**Figure S3. Statistical power and number of cross-disorder associations (Related to Table S4).** Power to detect associations across pairs of disorders was plotted with the number of cross-disorder associations identified in the current meta-analysis. For each pair of disorders, power was estimated using the number of cases and heritability for each disorder, as well as the genetic correlation between the disorders. In general, as power increased, so did the number of SNPs identified.

**Figure S4. Gene expression of top loci across development. (Related to Figure 3)** Gene expression trajectories from a transcriptome atlas of post-mortem brain tissue across development are plotted for four top loci, *DCC*, *RBFOX1*, *NOX4* and *BRAF* in six different brain tissue types. AMY = amygdala; MD = mediodorsal nucleus of the thalamus; CBC = cerebellar cortex; NCX = neocortex; HIP = hippocampus; STR = striatum.

**Figure S5. Gene expression in the brain for pleiotropic and non-pleiotropic loci. (Related to Figure 5)** Average normalized gene expression in fetal and adult post-mortem brain tissue for pleiotropic (109) and non-pleiotropic (37) loci were plotted. Disorder-specific and pleiotropic risk loci showed a similar level of gene expression in prenatal and postnatal development after multiple testing correction (t-test  $p > 0.025$ ).

## **STAR\* METHODS**

### **CONTACT FOR REAGENT AND RESOURCE SHARING**

Any inquiries about analytical results or other information should be directed to Phil H. Lee (plee0@mgm.harvard.edu) or Jordan W. Smoller (jsmoller@mgm.harvard.edu).

### **EXPERIMENTAL MODEL AND SUBJECT DETAILS**

#### **Genotyped sample description**

Genotype data from eight studies of genetic associations with psychiatric disorders conducted by the Psychiatric Genomics Consortium were included in this report. A summary of each study is provided below, however, detailed sample descriptions are available in the primary publication. The lead PI of every cohort included across studies certified that their protocol was approved by their local Ethical Committee.

Supplementary Table 1 lists for each disorder the number of cases and controls, the number of loci identified in the single disorder genome-wide association study, and SNP-based heritability.

#### **Schizophrenia | Ripke et al., 2014**

108 loci were identified as associated with schizophrenia in a case-control meta-analysis including 150,064 individuals. For the current study, the 46 case-control cohorts of European ancestry were retained, totaling 33,640 cases and 43,546 controls. Cases were defined as individuals diagnosed with schizophrenia or schizoaffective disorder, which was determined by research-based assessment or clinician diagnosis depending on the sample.

#### **Bipolar disorder | Stahl et al., 2018**

Thirty-two case-control cohorts from Europe, North America, and Australia including 20,352 cases and 31,358 controls of European ancestry were meta-analyzed to identify 30 loci associated with bipolar disorder. Cases met criteria for lifetime diagnosis of bipolar disorder as defined by DSM-IV, ICD-9, or ICD-10, which was established using interview-based structured assessment, clinician-administered checklists, or review of medical records. All subjects in the meta-analysis were included in the current study.

#### **Major depression | Wray et al., 2018**

Seven case-control cohorts were combined to identify 44 loci associated with major depression. The first cohort included 29 case-control samples of European descent where lifetime diagnosis of major depressive disorder was ascertained using structured clinical interviews (DSM-V, ICD-9, ICD-10), clinician-administered checklists,



or review of medical records. Six additional cohorts of European ancestry, including the Hyde et al study (23andMe, Inc), determined case status using other methods including national or hospital treatment registers, self-reported symptoms or treatment by a medical professional, or direct interviews. Analyses comparing the original cohort with the additional ones indicated strong correlation of common genetic variants and little evidence of heterogeneity. 130,664 cases and 330,470 controls from these cohorts were included in the current analyses.

### **Attention deficit hyperactive disorder | Demontis et al., 2019**

Twelve cohorts of European, North American, and Chinese descent were aggregated in a meta-analysis of attention deficit and hyperactive disorder, revealing 12 associated loci. For the first cohort, cases were ascertained using the Danish Psychiatric Central Research Registrar and diagnoses were confirmed by psychiatrists according to ICD-10. The remaining studies included four parent-offspring trio cohorts and seven case-control cohorts. Cases were recruited from clinics, hospitals or through medical registries and diagnosed using research-based assessments administered by clinicians or trained staff. 19,099 cases and 34,194 controls of European ancestry were included in the current study.

### **Autism spectrum disorder | Grove et al., 2017**

Five family-based cohorts of European descent and a population-based case-control sample from Denmark were combined to discover five loci associated with autism spectrum disorder. In each family study, diagnosis was confirmed for all affected individuals using standard research tools and expert clinical consensus diagnosis. In the population-based cohort, cases were identified using the Danish Psychiatric Central Research Register and were diagnosed with ASD before 2013 by a psychiatrist according to ICD-10. All subjects in this sample were included here (18,381 cases; 27,969 controls).

### **Obsessive compulsive disorder | IOCDF-GC and OCGAS, 2018**

Individuals of European descent from two cohorts were combined in this meta-analysis including 2,688 cases and 7,037 controls; no loci reached genome-wide significance. Case diagnoses were established using DSM-IV criteria and controls were unscreened. All cases and controls were included in the current analyses.

### **Anorexia nervosa | Duncan et al., 2017**

3,495 cases from two consortia and 10,982 matched controls from the Psychiatric Genomics Consortium, all of European descent, were meta-analyzed to identify one locus associated with anorexia nervosa. Cases met criteria as defined by DSM-IV for lifetime diagnosis of anorexia nervosa (restricting or binge-purging subtype), bulimia nervosa, or anorexia nervosa – not otherwise specified, anorexia nervosa

subtype. All individuals included in the primary study were included in the current analyses.

### **Tourette Syndrome | Yu et al., in press, *American Journal of Psychiatry***

Three case-control cohorts and one family-based cohort from Europe and North America including 4,819 cases and 9,488 controls of European ancestry were meta-analyzed to identify one locus associated with Tourette Syndrome. All cases met DSM-IV-TR or DSM-5 criteria for Tourette syndrome, except for 12 cases who met DSM-5 criteria for chronic motor or vocal tic disorder. All cases were recruited by Tourette syndrome specialty clinics or by email/online recruitment combined with validated, web-based phenotypic assessments.

### **Genotype quality control, imputation, and association analysis**

All primary studies used the standardized PGC ricopili pipeline for quality control, imputation and association testing. Briefly, for each dataset, poor quality SNPs and samples missing >5% SNPs were removed. Next, pre-phasing and imputation were implemented using IMPUTE2 (Howie et al., 2011) and the 1000 Genomes reference panel. High quality SNPs (INFO > 0.8) with low missingness (<1%) were retained. A subset of these markers (MAF > 0.05; pruned for linkage disequilibrium,  $r^2 > 0.02$ ) were used to assess relatedness and population stratification. Only one of any pair of related individuals was retained. Each imputed dataset was tested for association with the disease outcome of interest using an additive logistic regression model in PLINK (Purcell et al., 2007) with age, sex, and 10 principal components included as covariates. Finally, a meta-analysis within each disease category was done using an inverse-weighted fixed effects model. After extracting SNPs commonly exist in all eight disorder studies, we removed 3,591 SNPs whose alleles were incompatible. For palindromic SNPs, we compared allele frequencies between eight studies to check strand ambiguity. 50 SNPs with frequency difference greater than 15% from the 1KG reference was excluded. As a result, 6,786,994 autosomal SNPs remained for further analysis.

## **QUANTIFICATION AND STATISTICAL ANALYSIS**

### **Genome-wide SNP-heritability estimation**

For each of the eight GWAS disorders, LD Score regression was performed on the summary statistics of individual disease using LDSC to estimate SNP-based heritability in the liability scale and genetic correlation between pairs of disorders (Bulik-Sullivan et al., 2015b). LD scores and weights for European populations were downloaded from the LDSC website ([http://www.broadinstitute.org/~bulik/eur\\_ldscores/](http://www.broadinstitute.org/~bulik/eur_ldscores/)). SNPs were removed if the minor allele frequency is smaller than 5% or an imputation quality score is less than 0.9; MHC region was excluded from the analysis. For single-trait LDSC, the slope of the regression estimates the SNP-based heritability, and the intercept captures the inflation in the summary statistics due to population stratification or other confounding

factors. We confirmed that the heritability Z-scores (i.e., a measure of the polygenic signals) are greater than four, and the LDSC intercepts are approximately one and less than  $\lambda_{GC}$ . This suggests that the increase in mean  $\chi^2$  statistics is mostly due to polygenicity and not due to stratification.

### Factor analysis and genomic SEM

Genomic SEM's Multivariable LD score regression method (Grotzinger et al., 2018) was first used to estimate the genetic covariance matrix (S) and sampling covariance matrix (V) for the eight psychiatric traits. Quality control for this step included removing SNPs with an MAF < 1%, information scores < .9, SNPs from the MHC region, and filtering SNPs to HapMap3. All SNP effects were standardized using the sumstats function in Genomic SEM. To examine genome-wide factor structure, models using only the genetic covariance and sampling covariance matrix were fit. Genomic SEM provides indices of model fit—standardized root mean square residual (SRMR), model  $\chi^2$ , Akaike Information Criteria (AIC), and Comparative Fit Index (CFI)—that can be used to determine how well the proposed model captures the observed data. Model fit for the common factor model in which the loadings were freely estimated was only fair, ( $\chi^2$  (20) = 313.94, AIC = 345.9, CFI = .786, SRMR = .149), suggesting that there were nuances in the genetic architecture not fully captured by a single cross-trait index of genetic risk. An exploratory factor analysis (EFA) of the S matrix with three-factors using the promax rotation in the R package factanal was then used to guide construction of a follow-up model (**Supplementary Table 3**). A follow-up confirmatory model with three correlated factors was specified in Genomic SEM based on the EFA parameter estimates (positive standardized loadings > .2 were retained; Figure 2b). This model provided good fit to the data ( $\chi^2$  (15) = 85.35, AIC = 127.36, CFI = .945, SRMR = .079). Results indicated there was a moderate genetic correlation between the compulsive and mood/psychotic disorders factors ( $r_g = .43$ ,  $SE = .07$ ), a smaller genetic correlation between the mood/psychotic and early onset factors ( $r_g = .24$ ,  $SE = .05$ ), and next to no correlation between the compulsive and early onset factors ( $r_g < .01$ ,  $SE = .07$ ). A model that included additional negative cross-loadings provided similar fit to the data and highly similar correlations across the genetic factors. Given this consistency in results, the correlated factors model with SNP effects only included positive loadings.

### Summary-data-based meta-analysis

To identify genomic loci shared across multiple neuropsychiatric disorders, we performed primary meta-analysis using the subset-based fixed-effects method ASSET (Bhattacharjee et al., 2012). Standard meta-analysis pools the effect of a given SNP across  $K$  studies, weighting the effects by the size of the study. In this subset-based meta-analysis, this basic procedure – as well as a null probability distribution for a SNP having no effect in any study – was calculated for all subsets of studies to determine a given SNP's subset-specific effect. The maximum SNP effect across subsets can be denoted

$$Z_{max-meta} = \max_{S \in \mathcal{S}} |Z(S)|,$$

where the absolute value of the subset-specific effect  $[Z(S)]$  over class  $S$  of all possible subsets of  $K$  studies is highest. The numbers of shared subjects across eight disorder studies were identified using the PGC checksum algorithm, and  $Z_{meta}$  was standardized so that covariance between the statistics can be accounted for as previously described (Bhattacharjee et al., 2012; Lin and Sullivan, 2009). Tail probabilities for the distribution of the maximum were then estimated with the discrete local maxima method, which uses the correlation structure of test statistics across subsets. Based on this distribution, a p-value was derived using a one-sided test of the test statistic ( $Z$ ); each directional test can then be combined using a chi-square method (Fisher's combined p-value method). Even when correcting for all subset tests ( $2^K - 1$ ), simulations suggest there is a substantial gain in power using this test relative to traditional meta-analysis.

Once SNPs with genome-wide significant association were identified, we identified LD-independent genomic regions using PLINK clumping (`--clump-r2=0.4, --clump-kb=500, --clump-p1=5e-08, --clump-p2=5e-02`). Genomic regions were merged if they physically overlap using bedtools. Due to extensive LD, the MHC region was considered as one region (chr6:25-35Mb). To detect secondary signals independent of index SNP in each of the candidate cross-disorder loci, conditional analysis was performed with GCTA-COJO (Yang et al., 2012) using meta-analysis summary statistics from ASSET. 1KG EUR population was used as the reference panel for estimating LD. For each genomic region harboring a cross-disorder signal, we tested the presence of any additional associated SNPs using a stepwise procedure (`--cojo-slct`), conditioning on the primary significant SNP for model initiation. A conditional p-value for each variant was reported, adjusted for genomic control and collinearity. In each region, additional SNPs were selected as a distinct association signal if having a conditional p-value  $< 1e-06$ .

### Disease-association modeling

We estimated posterior probabilities for each of the top loci identified from the meta-analysis to quantify disorder-specific effects (Han and Eskin, 2012). This estimation, known as the  $m$ -value, relies on two assumptions, 1) effects are either present or absent in studies, and 2) if they are present, they are similarly sized across studies. Assume  $X_i$  is the observed effect size of study  $i$ , and  $T_i$  is a random variable with value 1 if study  $i$  has an effect and 0 if not, then the  $m$ -value can be estimated using Bayes' theorem:

$$m_i = P(T_i = 1|X) = \frac{P(X|T_i = 1)P(T_i = 1)}{P(X|T_i = 0)P(T_i = 0) + P(X|T_i = 1)P(T_i = 1)}$$

which can then be used to predict whether an effect exists in a given study ( $>.9$ ) or not ( $<.1$ ) under the binary effects assumption. For further details, refer to the publication by Han & Eskin (2012).

### **Functional annotation and gene-mapping of genome-wide significant variants**

For the 146 genome-wide significant variants, gene mapping and functional annotation was conducted using various resources, including SNP Nexus (Dayem et al., 2018) and FUMA (Watanabe et al., 2017). Nearest genes and functional consequence of each SNP on gene functions were annotated based on ANNOVAR (Wang et al., 2010). Combined Annotation Dependent Depletion (CADD) score (Kircher, 2014) indexes the deleteriousness of variants computed based on 67 annotation resources. SNPs with the CADD score higher than 12 were considered to confer deleterious effects. The RegulomeDB (Boyle, 2012) provides a categorical score that describes how likely a SNP is likely to play a regulatory role based on the integration of high-throughput datasets. The RDB score of 1a suggests the strongest evidence while the score 7 represents the least support for a regulatory potential. The minChrState and the commonChrState represent the minimum and the most common 15-core chromatin state across 127 tissue/cell type predicted by ChrHMM. The chromatin state of less than 8 suggests an open chromatin state. We also performed eQTL mapping, which provides significant *cis*-SNP-gene pairs (up to 1Mb apart) in brain tissue types from GTEx and BRAINEAC.

For chromatin interaction mapping, we first refined the localization of potential causal variants for top 146 lead SNPs. We then used FINEMAP (Benner et al., 2016) to identify credible SNPs. For each region, we considered only SNPs located in the LD region with the lead SNP ( $r^2 > 0.6$ ). We then applied the method to calculate the posterior probability of being causal for each of the remaining SNPs. A 95% credible set of SNPs for each region was constructed by ordering the posterior probability from largest to smallest and selecting in the corresponding SNPs up to a cumulative probability of 95%. Credible SNPs were then grouped into those that are located within the promoter or exons and those that are non-coding/intronic. Promoter/exonal SNPs were directly assigned to their target genes using positional mapping, while non-coding/intronic SNPs were assigned to their target genes based on long range interactions (Hi-C) or expression quantitative trait loci (eQTLs). Two Hi-C datasets originated from the human brain (fetal brain Hi-C (Won et al., 2016) and adult brain Hi-C (Wang et al., 2018)) were used to map credible SNPs as previously described (Wang et al., 2018). A colocalization analysis with the recent eQTL dataset from adult prefrontal cortices (PFC) was also used to map 146 GWS loci into their target genes (Wang et al., 2018). In the end, we obtained two sets of candidate genes, one from fetal brain (positional mapping, fetal brain Hi-C), the other from adult brain (positional mapping, adult brain Hi-C, adult brain eQTLs).

### **GTEx gene expression enrichment analysis**

MAGMA gene-property analysis (de Leeuw et al., 2015) was performed using gene expression data from 83 tissues based on GTEx RNA-seq data (v7). Expression values (RPKM) were log<sub>2</sub> transformed with pseudo-count one after winsorization at 50, and



average expression values were taken per tissue. Analysis was performed separately for 30 general tissue types and 53 specific tissue types.

### **Pathway analysis using Gene Ontology**

We used FUMA (Watanabe et al., 2017) to map SNPs to genes and then test for enrichment of specific Gene Ontology functions and pathways among genome-wide significant pleiotropic and disorder-specific SNPs separately. Hypergeometric tests identify any statistical over-representation of genes from the input list (mapped from SNPs) in predefined Gene Ontology gene sets which describe biological processes, molecular functions, and cellular components. Multiple test correction was applied by category.

### **Enrichment analysis using brain developmental, regional, and cell-type-specific data**

Developmental expression trajectories for candidate genes were plotted using a published transcriptome atlas constructed from post-mortem brain data (Kang et al. 2011). Expression values were log-transformed and centered using the mean expression values for all brain expressed genes. Mean expression values for candidate genes were plotted across prenatal (6-37 weeks post-conception) and postnatal (4 months to 62 years) developmental stages. We used candidate genes identified in fetal brain and adult brain to plot prenatal and postnatal gene expression profiles, respectively.

To obtain genes that show cortical regional enrichment (e.g. frontal cortical enrichment), we computed t-statistics for each gene for a specific cortical region (e.g. frontal cortex) versus all other cortical regions (e.g. parietal cortex, temporal cortex, and occipital cortex, Kang et al. 2011). Top 5% of genes that show specific expression patterns for each cortical region were selected as region-specific genes. These genes were then overlapped with candidate genes by Fisher's exact test to measure cortex regional enrichment.

Single cell expression profiles from the adult brain (Darmanis et al., 2015) were used to identify cell-type specificity of candidate genes. Single cell expression values were log-transformed and centered using the mean expression values. Average centered expression values for candidate genes were calculated in each cell. Cells were then grouped into cell clusters (neurons, astrocytes, microglia, oligodendrocytes, OPC, and endothelial cells), and a relative expression level for a given cell cluster was calculated by a *scale* function in R.

Developing neural cell-type enrichments were estimated using expression profiles of single-cells taken from fetal cortical laminae. Cell-type specific genes were selected according to a significant Pearson correlation ( $FDR < 0.05$ ) between the gene and an

idealized cluster marker for each cell-type, following the approach described in original publication. Candidate gene enrichment for each set of specifically expressed genes was estimated by logistic regression and adjusting for gene length.

### **Comparison with other brain-related traits and diseases**

To look for other traits that show an association with our top loci, we examined publicly available GWAS summary statistics of 11 brain-related and 10 non-brain-related traits and disorders. The selected brain-related traits include Alzheimer's disease (Lambert et al., 2013), anxiety (Otowa et al., 2016), all epilepsies (International League Against Epilepsy Consortium on Complex Epilepsies. Electronic address, 2014), genetic generalized epilepsy (International League Against Epilepsy Consortium on Complex Epilepsies. Electronic address, 2014), non-acquired focal epilepsy (International League Against Epilepsy Consortium on Complex Epilepsies. Electronic address, 2014), intracerebral hemorrhage (Woo et al., 2014), post-traumatic stress disorder (Duncan et al., 2018), ischemic stroke (all) (Malik et al., 2016), cardioembolic stroke (Malik et al., 2016), large-vessel disease (Malik et al., 2016), and small vessel disease (Malik et al., 2016), non-brain-related traits include height (Wood et al., 2014), obesity (Berndt et al., 2013), Crohn's disease (Goyette et al., 2015; Liu et al., 2015), inflammatory bowel disease (Goyette et al., 2015; Liu et al., 2015), ulcerative colitis (Goyette et al., 2015; Liu et al., 2015), coronary artery disease (Nikpay et al., 2015), sleep duration (Jones et al., 2016), number of children ever born (Barban et al., 2016), subject well-being (Okbay et al., 2016), and neuroticism (Okbay et al., 2016). Data source and sample size information for each individual GWAS can be found in Table S16. All the summary results files were harmonized before use, with reference and effect alleles matched up across studies for each index SNP. We then extracted the association statistics of the lead SNPs—effect sizes with standard errors (or Z-scores) and p-values—with each of the traits listed herein. Where the index variant was not available, the nearest proxy SNP ( $r^2 > 0.8$ ) was used for reporting the association.

### **DATA AND SOFTWARE AVAILABILITY**

The Psychiatric Genetics Consortium (PGC)'s policy is to make genome-wide summary results publicly available. Summary statistics for a combined meta-analysis of eight psychiatric disorders without 23andMe data are available on the PGC web site (<https://www.med.unc.edu/pgc/results-and-downloads>). Results for 10,000 SNPs for eight disorders including 23andMe are also available on the PGC web site. The summary-level GWAS association statistics for PGC individual disorders are available at the website (<https://www.med.unc.edu/pgc/results-and-downloads>).

GWAS summary statistics for the 23andMe cohort (Hyde, 2016) must be obtained separately. These can be obtained by individual researchers under an agreement with 23andMe that protects the privacy of the 23andMe participants. Contact Aaron Petrakovitz ([apetrakovitz@23andme.com](mailto:apetrakovitz@23andme.com)) to apply for access to the data.

## Supplementary Tables

**Table S1. Summary of eight neuropsychiatric disorder datasets (Related to Table 1).** Disease-specific cases and controls included in the meta-analysis, number of individual GWAS loci, and liability-based SNP heritability estimates are provided. Heritability was estimated from available European summary statistics using LD score regression.

**Table S2. Genetic correlations estimated by LD score regression. (Related to Figure 1)** Genetic correlations and standard errors between pairs of disorders were estimated from European GWAS summary statistics using LD score regression.

**Table S3. Results from EFA of genetic covariance matrix (Related to Figure 1 and Figure S1)**

We estimated the genetic covariance matrix across eight psychiatric traits using genomic SEM and then performed an exploratory factor analysis, which revealed three factors. Individual disease loadings on each factor are listed as well as correlations between factors.

**Table S4. List of 146 lead SNPs (Related to Figure 3 and Figure S2)**

The cross-disorder fixed-effects meta-analysis identified 136 loci and within these loci, multi-SNP-based conditional analyses identified 10 additional SNPs. The details of these 146 lead SNPs, as well as the posterior probability of disease-specific associations estimated using a Bayesian statistical framework are listed.

**Table S5. Disorder-specific association (Related to Figure 3 and Figure S2)**

Disease-specific associations are listed for all 146 lead SNPs.

**Table S6. Loci with opposite directional effects (Related to Figure 4)**

SNPs with a cross-disorder meta-analysis  $p \leq 1 \times 10^{-6}$  that showed disorder-specific effects in opposite directions are listed along with the effects for each disease.

**Table S7. Functional annotation of 146 lead SNPs (Related to Table S4)**

Functional annotation for the genome-wide significant SNPs was done using SNP Nexus, FUMA, and ANNOVAR. SNPs were mapped to the nearest gene within 100kb when possible and various functional consequences were annotated including combined annotation dependent depletion (CADD) scores, which reflect the deleteriousness of variants based on 67 annotation resources, and likelihood SNP plays a regulatory role based on the RegulomeDB (1 = strongest; 7 = weakest).

**Table S8. Brain eQTL and Hi-C data annotation based on FUMA database (Related to Table S4)**

Genome-wide significant SNPs were tested for any eQTL effects in brain tissues. Significant *cis*-SNP-gene pairs (up to 1Mb apart) identified in GTEx (v7) or BRAINEAC are listed along with associated p-values. Additionally, fine-mapping for the 146 lead SNPs was done using an efficient summary statistics-based Bayesian method to identify a 99% credible set of SNPs for each region. These SNPs were used to identify long-range interactions with the regions harboring a candidate SNP using brain Hi-C datasets. The Hi-C tissue, regions, and p-values were reported.

**Table S9. GWAS catalog data for lead SNPs (Related to Table S4)**

The NHGRI-EBI GWAS Catalog was queried for each SNP to identify all traits previously associated with a lead SNP (p-value <  $1 \times 10^{-5}$ ), along with the corresponding effect sizes and p-values.

**Table S10. GTEx gene enrichment analysis using MAGMA (Related to Figure 5)**

To investigate enrichment of lead SNPs within certain tissue types, we performed a MAGMA gene-property analysis using gene expression data from 83 tissues based on GTEx RNA-seq data (v7). Enrichment statistics for each tissue are listed.

**Table S11. Tissue enrichment analysis for pleiotropic risk loci using MAGMA (GTEx v7) (Related to Figure 5)**

To evaluate pleiotropic-specific effects, we assessed enrichment for the 109 pleiotropic lead SNPs using MAGMA and 83 tissues based on GTEx v7. The statistics for each tissue are listed.

**Table S12. Tissue enrichment analysis for disorder-specific risk loci using MAGMA (GTEx v7) (Related to Figure 5)**

To evaluate disorder-specific effects, we assessed enrichment for non-pleiotropic lead SNPs using MAGMA and 83 tissues based on GTEx v7. The statistics for each tissue are listed.

**Table S13. Gene ontology analysis for pleiotropic loci (Related to Result - *Functional characterization of pleiotropic risk loci*)**

We used Gene Ontology data to identify any enrichment among the 109 pleiotropic SNPs for specific biological processes (GO\_bp), molecular functions (GO\_mf), or cellular components (GO\_cc). Gene sets for which significant enrichment was identified are listed along with raw and adjusted p-values.

**Table S14. GO enrichment analysis for disease-specific risk loci (Related to Result - *Functional characterization of pleiotropic risk loci*)**

We used Gene Ontology data to identify any enrichment among the 37 disease-specific loci for specific biological processes (GO\_bp), molecular functions (GO\_mf), or cellular components (GO\_cc). Gene sets for which significant enrichment was identified are listed along with raw and adjusted p-values.

**Table S15. GWAS Catalog enrichment analysis for top genome-wide significant loci (Related to Result - *Functional characterization of pleiotropic risk loci*)**

For traits in the NHGRI-EBI GWAS Catalog, we mapped genome-wide significant loci to genes and then assessed the overlap between genes for a given trait and genes linked to the top loci for the current meta-analysis. We calculated p-values associated with the degree of overlap relative to what would have been expected by chance.

**Table S16. Comparison of disease-specific vs. pleiotropic risk loci by various functional and genomic features (Related to Result - *Functional characterization of pleiotropic risk loci*)**

Functional and genomic features were compared between pleiotropic and non-pleiotropic loci. Statistics from t-tests, as well as ANOVAs, comparing these two groups were reported.

**Table S17. Genetic correlation analysis of top cross-disorder loci with 28 brain-related traits (Related to Result - *Relationship between cross-disorder genetic risk and other brain-related traits and diseases*)**

We used LD score regression to estimate genetic correlations between cross-disorder risk and 28 other publicly available brain-related traits. These effects, along with data source and sample size information for each individual GWAS were listed.

**Table S18. GWAS catalog enrichment analysis for pleiotropic risk loci (Related to Result - *Relationship between cross-disorder genetic risk and other brain-related traits and diseases*)**

We used Gene Ontology data to identify any enrichment among the 109 pleiotropic SNPs for brain-related traits. Gene sets for which significant enrichment was identified are listed along with raw and adjusted p-values.



**Figure S1. Hierarchical clustering of genetic architecture across eight neuropsychiatric disorders. (Related to Table S3)** Hierarchical clustering revealed three sub-groups within the eight disorders. Results were very similar to those obtained using exploratory factor analysis and genomic structural equation modeling.

# Cluster Dendrogram

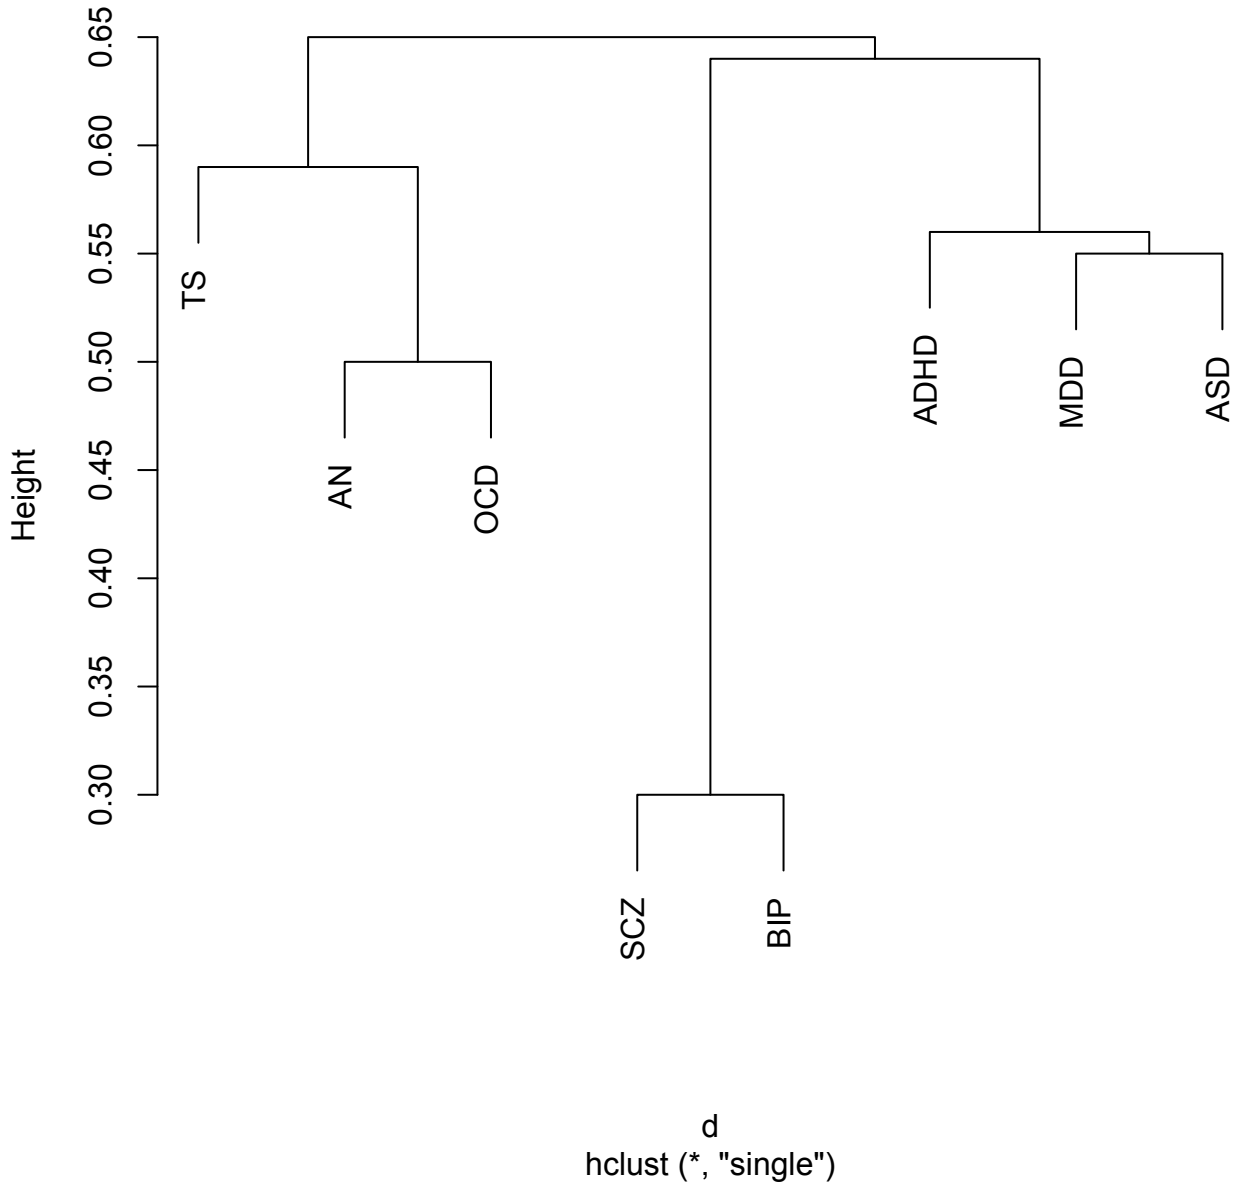

**Figure S2. P-M plots for top 146 loci. (Related to Figure 3 and Table S5)** M-values were generated for each locus for each disorder and indicate the presence or absence of a disorder-specific effect. M-values were plotted with the negative log odds of the corresponding p-values for each disorder for a given SNP; P-M plots were generated for each of the top 146 loci. Log odds ratios for the effect of the SNP on each disorder and a summary across disorders was also plotted. As expected, most of the top SNPs (109/146) were pleiotropic.

# rs4702 (Meta $P = 2.46 \times 10^{-11}$ )

Gene : *FURIN*, *FES*

## GWAS P-value

- $2.55 \times 10^{-12}$  ● 1.SCZ
- 0.0007 ● 2.BIP
- 0.0004 ● 3.MD
- 0.1043 ● 4.ASD
- 0.0023 ● 5.ADHD
- 0.9832 ● 6.TS
- 0.4189 ● 7.ANO
- 0.9787 ● 8.OCD

FE summary

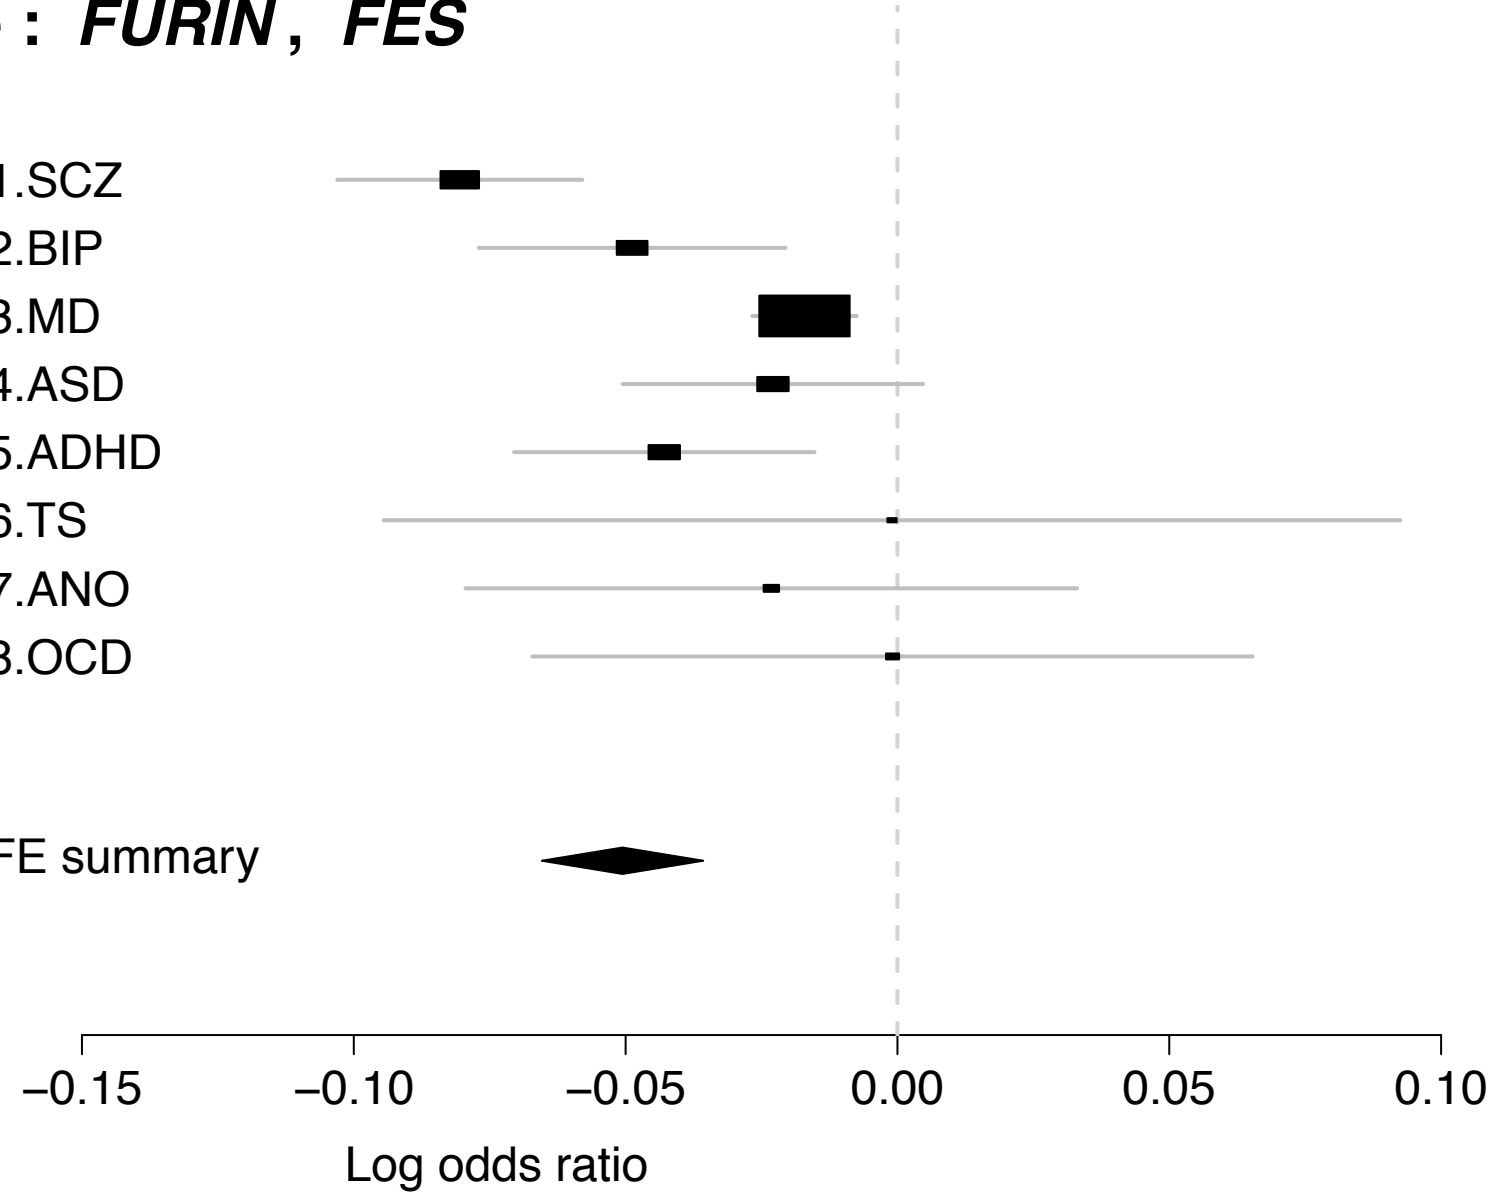

## PM-Plot

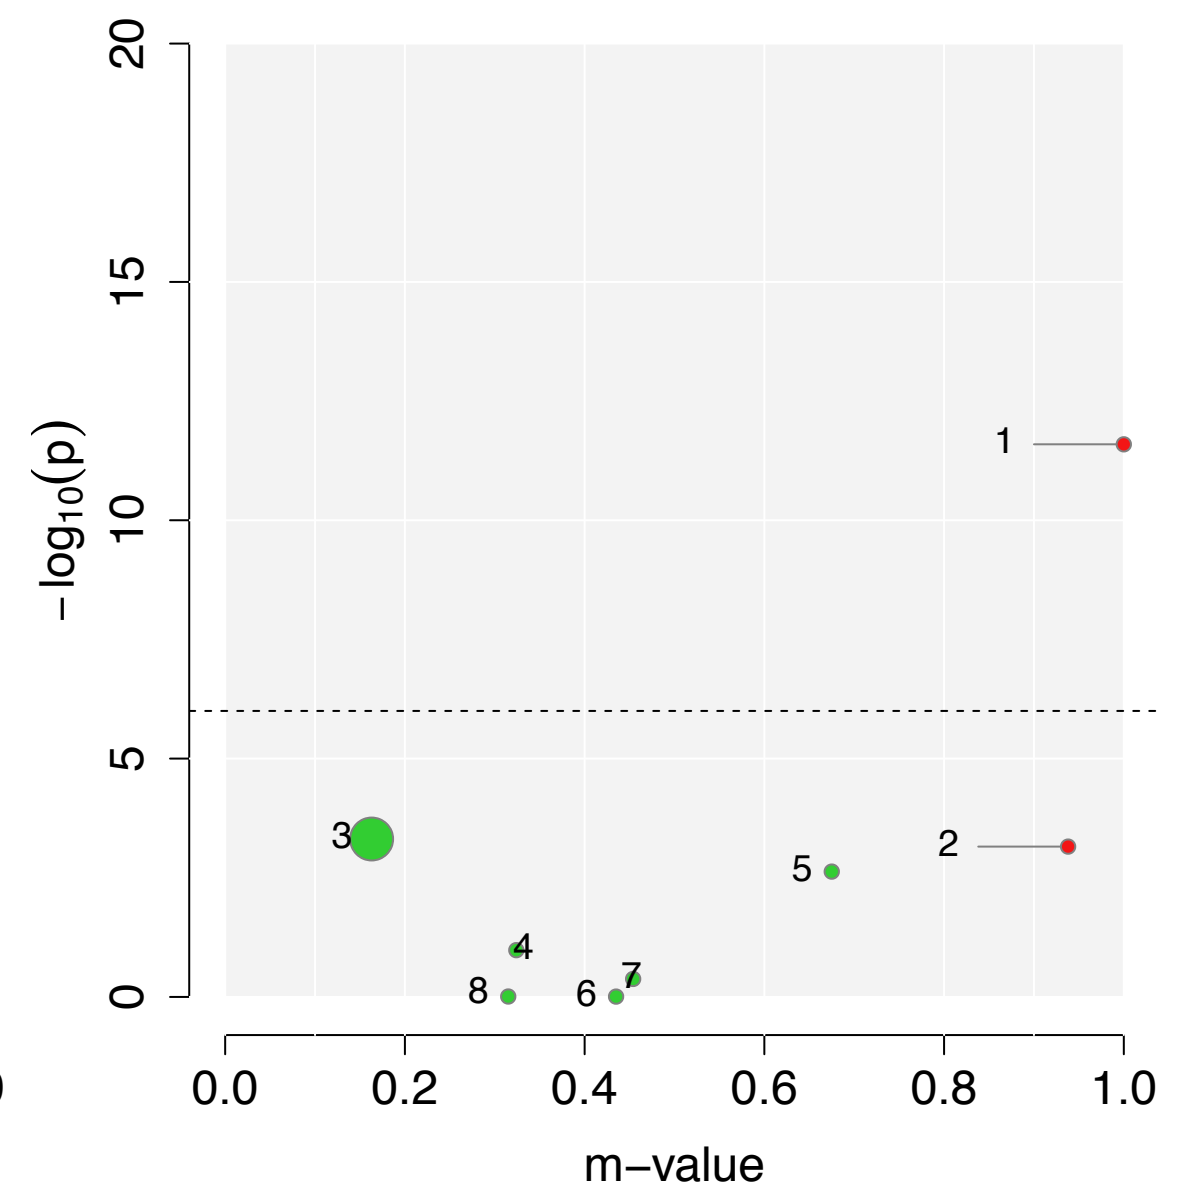

# rs12552 (Meta $P = 1.25 \times 10^{-18}$ )

Gene : *OLFM4*

## GWAS P-value

- 0.6012 ● 1.SCZ
- 0.0191 ● 2.BIP
- $4.00 \times 10^{-19}$  ● 3.MD
- 0.0215 ● 4.ASD
- 0.0214 ● 5.ADHD
- 0.1894 ● 6.TS
- 0.7859 ● 7.ANO
- 0.6274 ● 8.OCD

FE summary

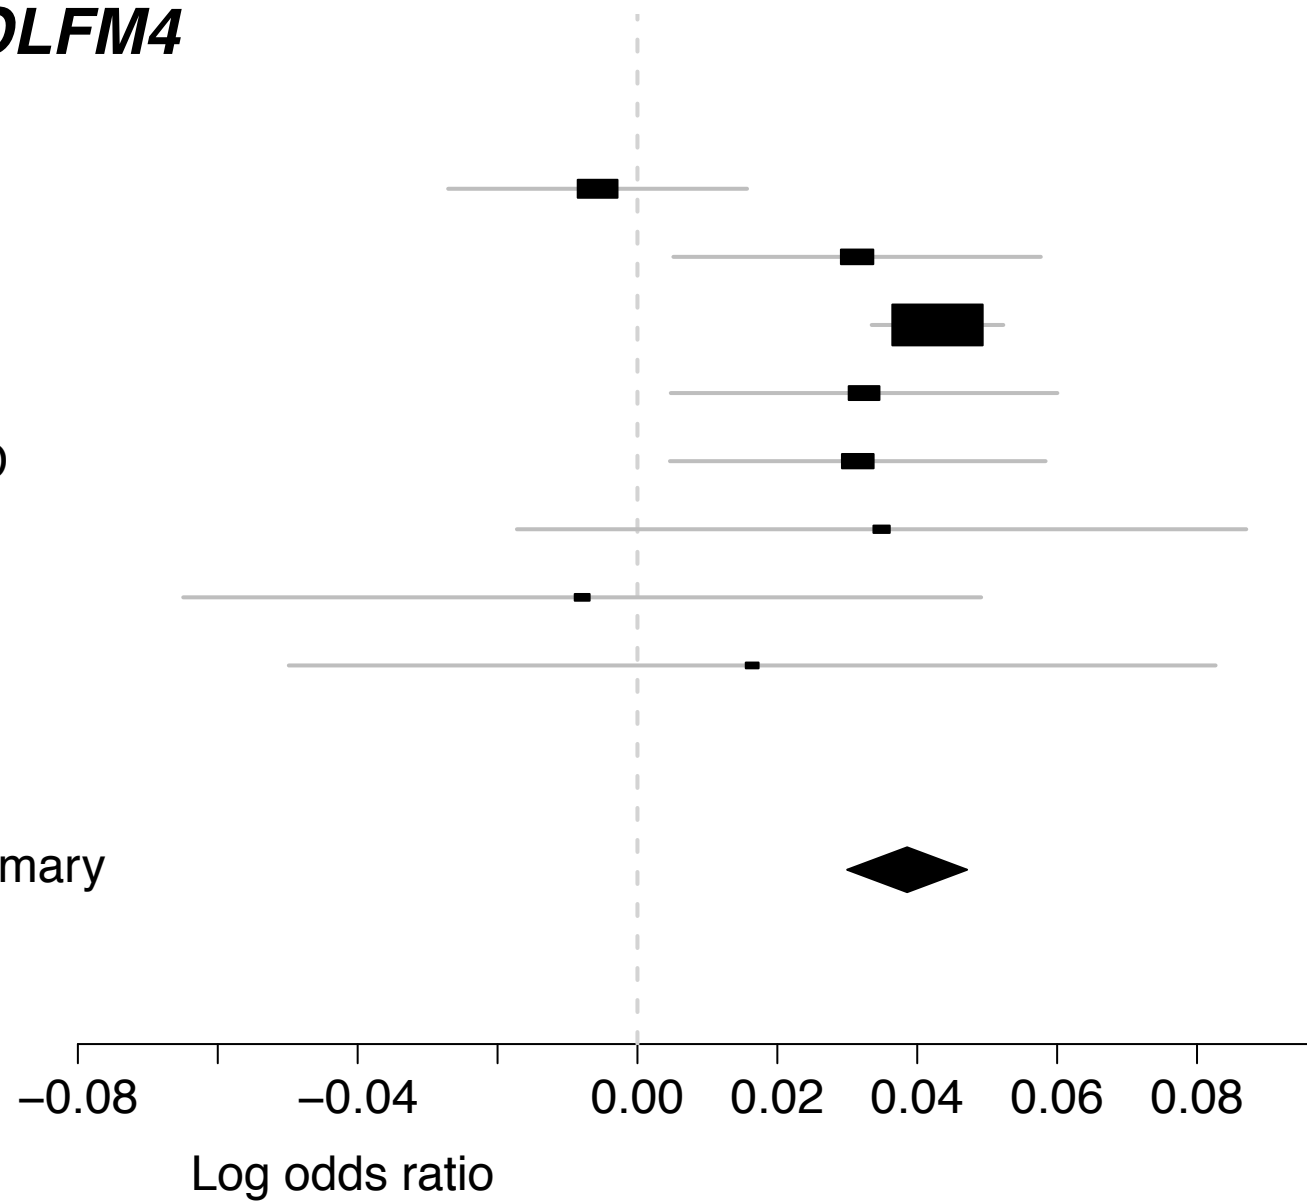

## PM-Plot

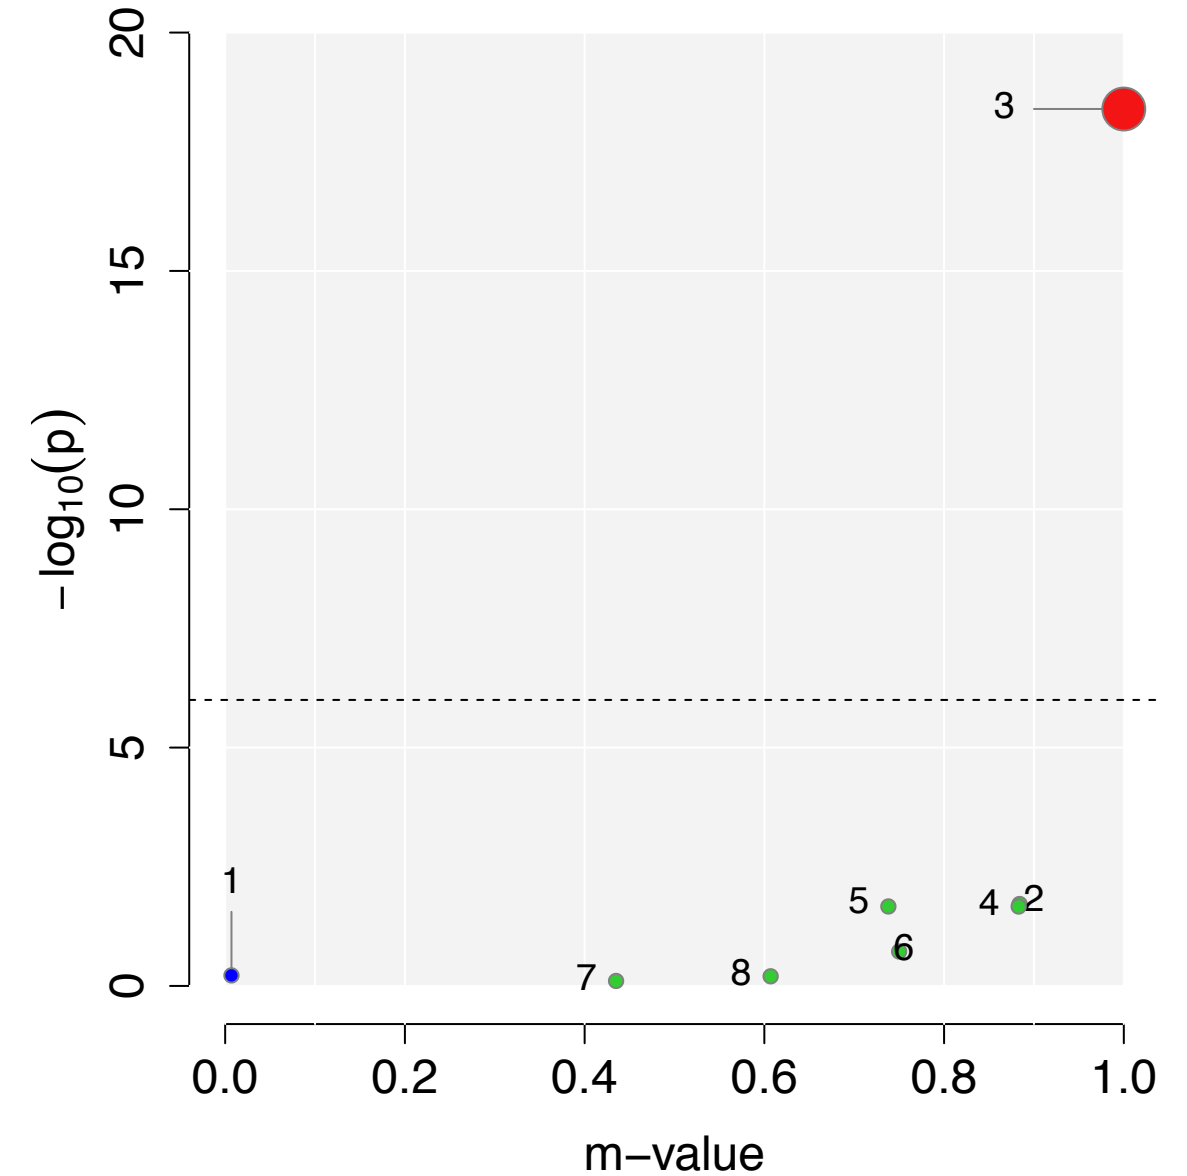

# rs27419 (Meta $P = 1.11 \times 10^{-8}$ )

Gene : *MOCS2*, *ITGA2*

## GWAS P-value

- 4.78 x 10<sup>-6</sup> ● 1.SCZ
- 0.4544 ● 2.BIP
- 0.0308 ● 3.MD
- 6.15 x 10<sup>-5</sup> ● 4.ASD
- 0.0486 ● 5.ADHD
- 0.0236 ● 6.TS
- 0.9813 ● 7.ANO
- 0.2481 ● 8.OCD

FE summary

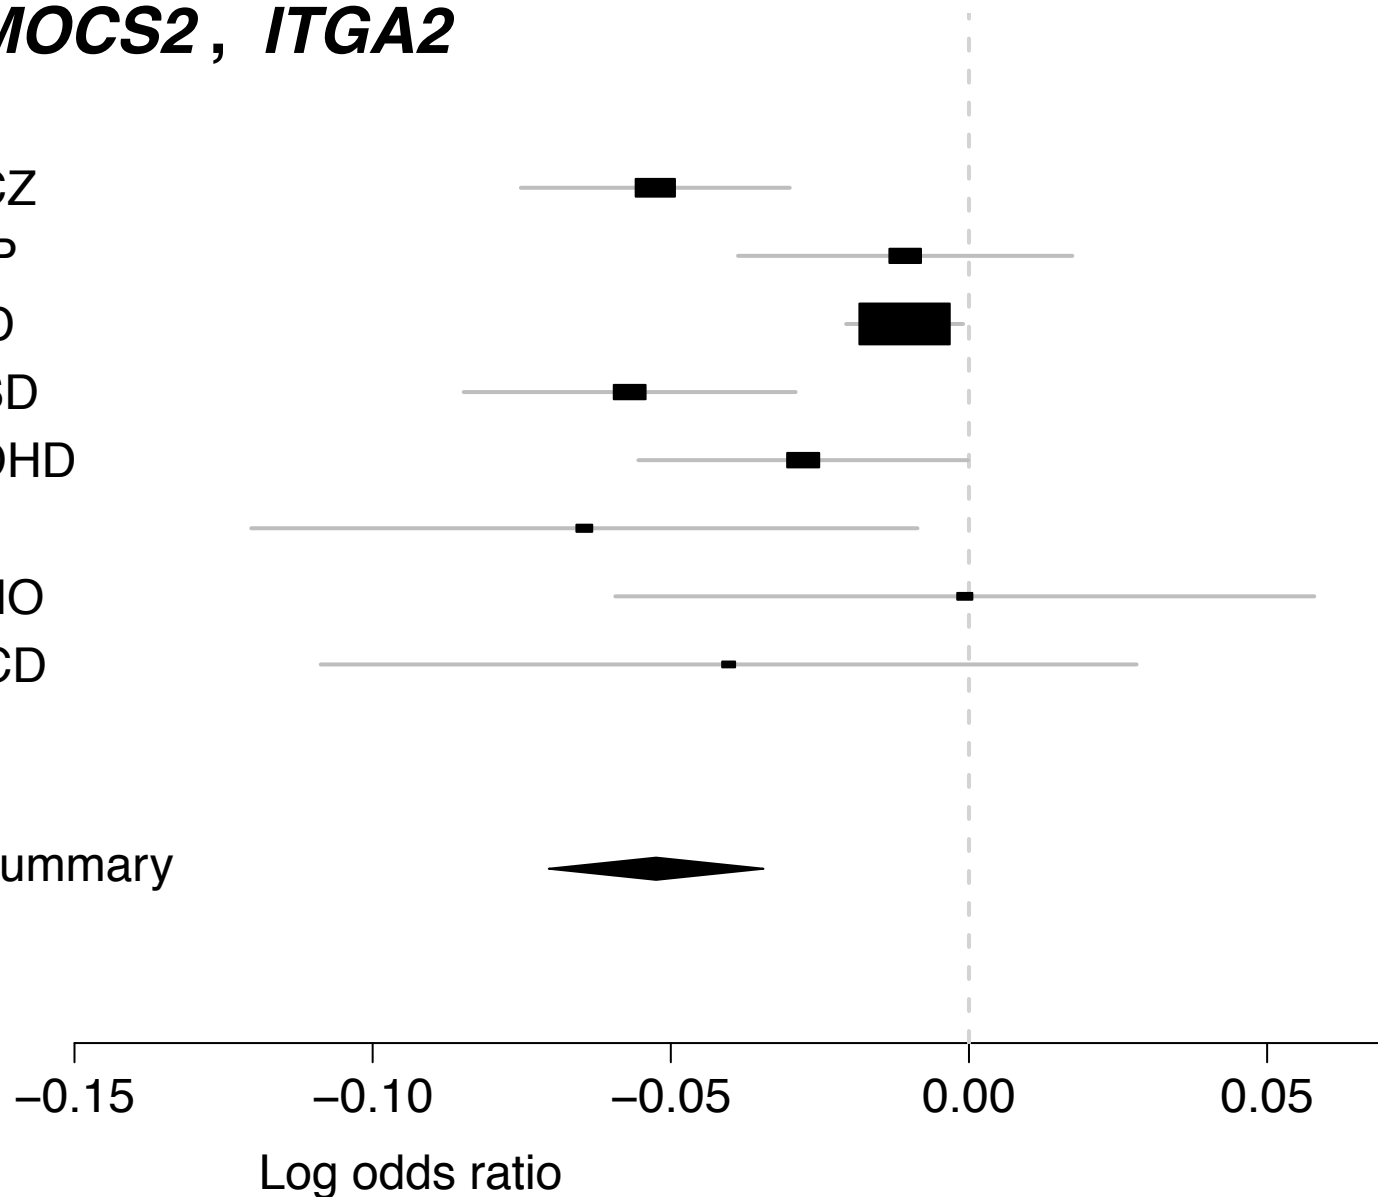

## PM-Plot

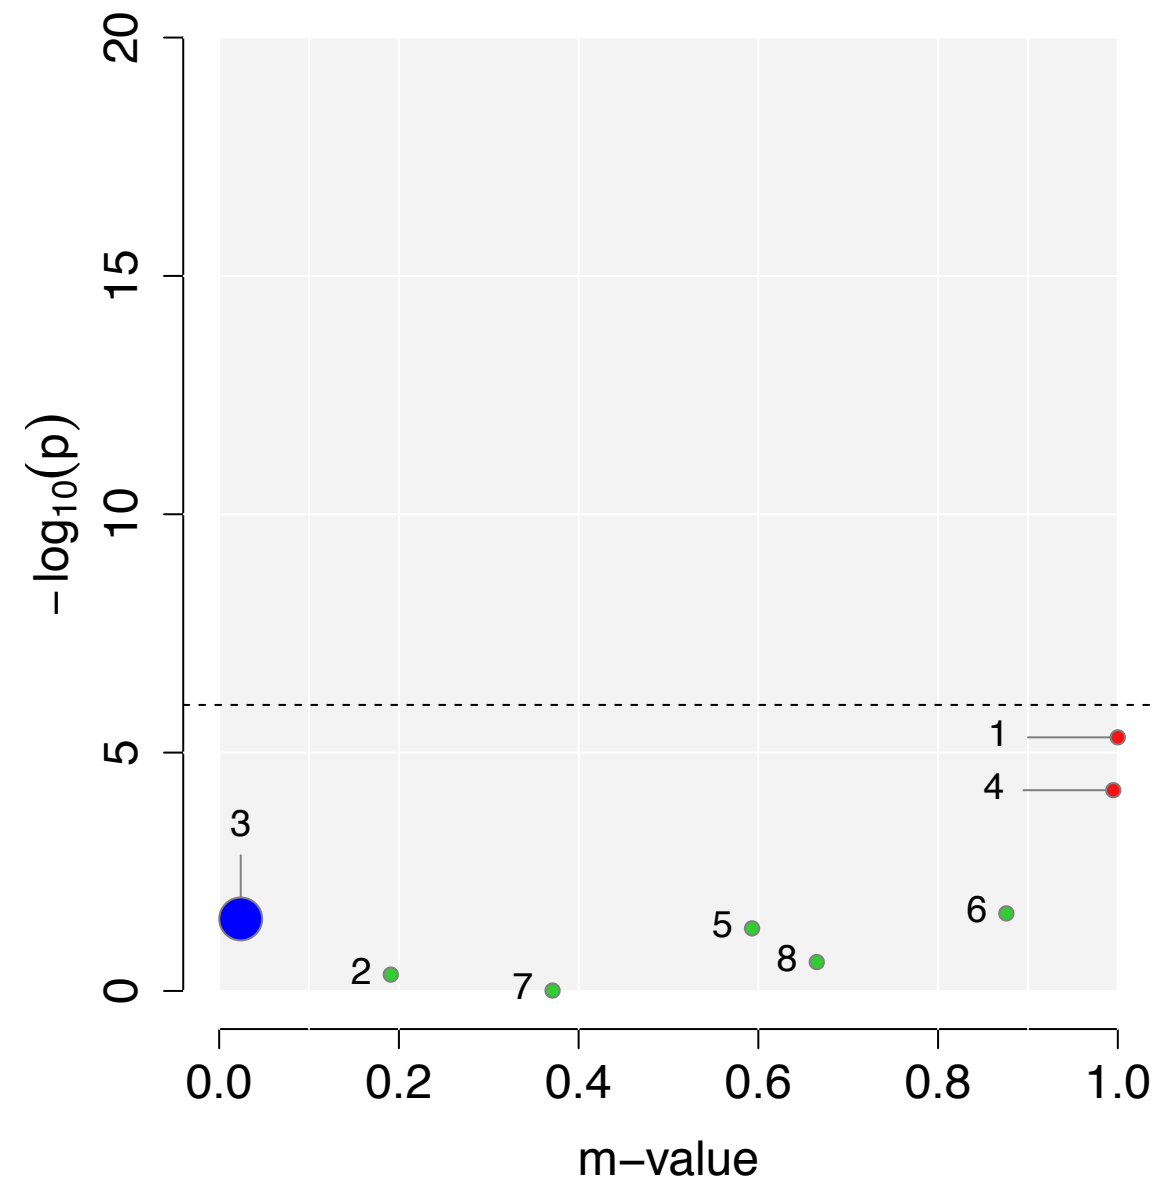



# rs174592 (Meta $P = 6.14 \times 10^{-9}$ )

Gene : *FADS2*, *FADS3*

## GWAS P-value

- 0.1767 ● 1.SCZ
- $4.03 \times 10^{-8}$  ● 2.BIP
- $5.15 \times 10^{-7}$  ● 3.MD
- 0.6023 ● 4.ASD
- 0.6852 ● 5.ADHD
- 0.4253 ● 6.TS
- 0.3221 ● 7.ANO
- 0.4378 ● 8.OCD

FE summary

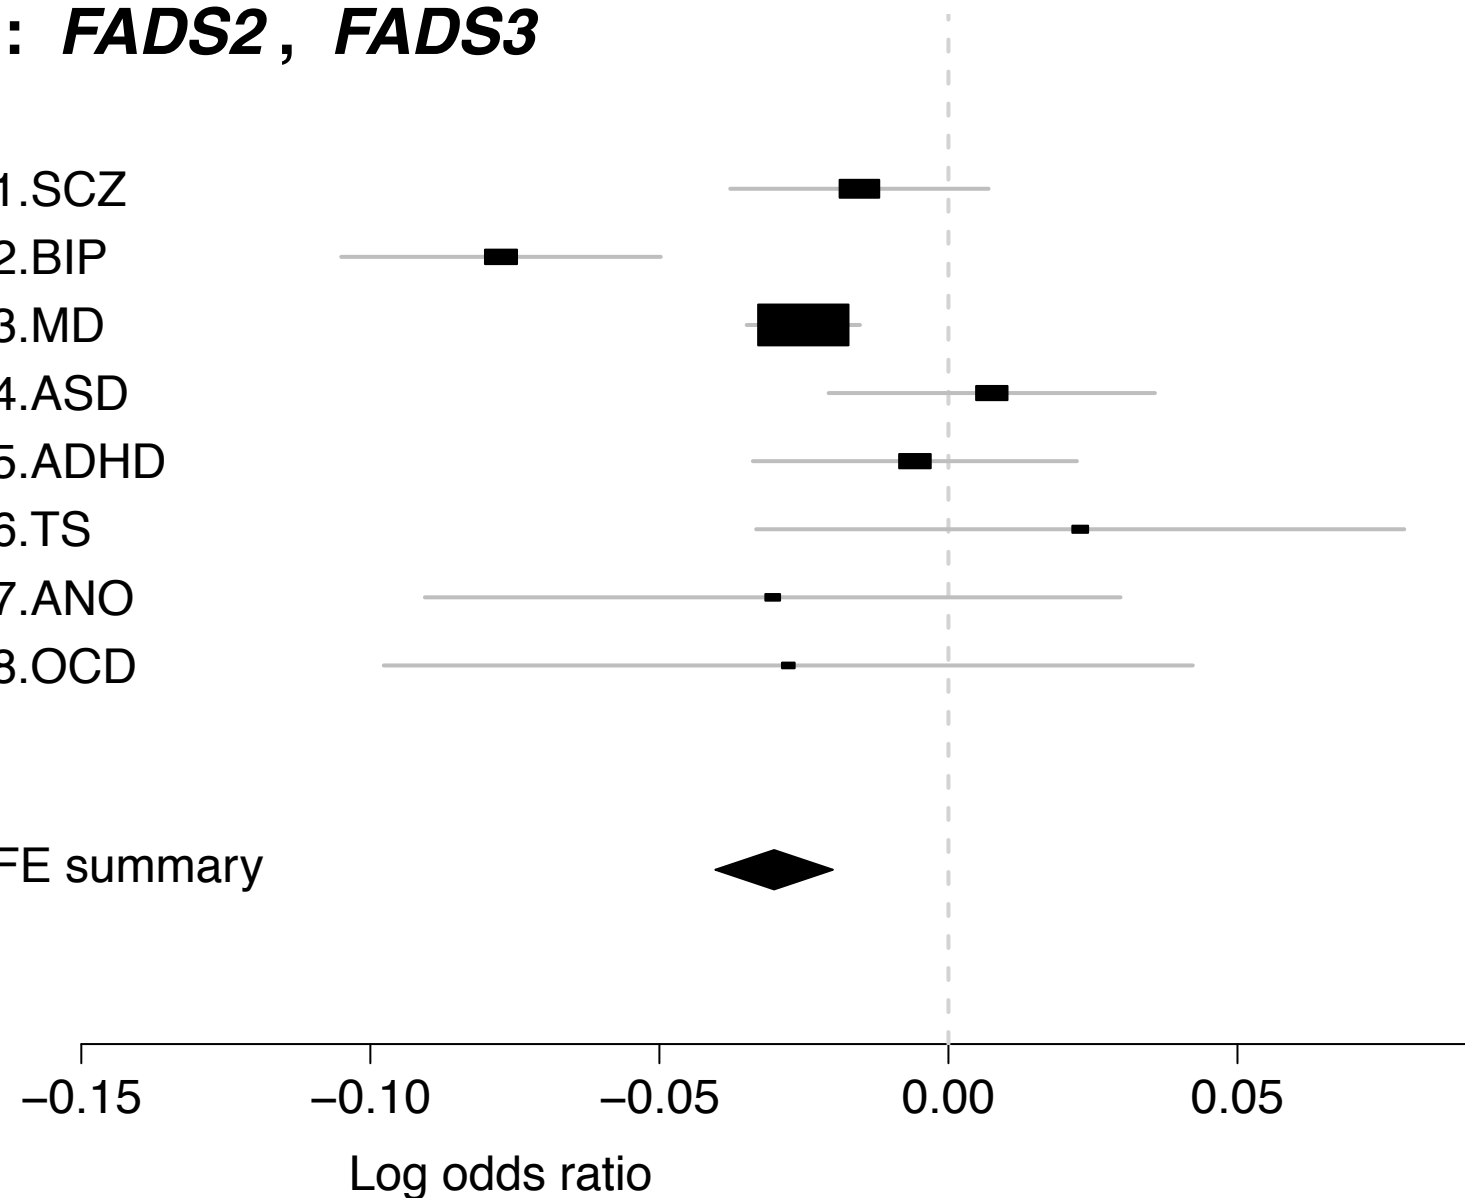

## PM-Plot

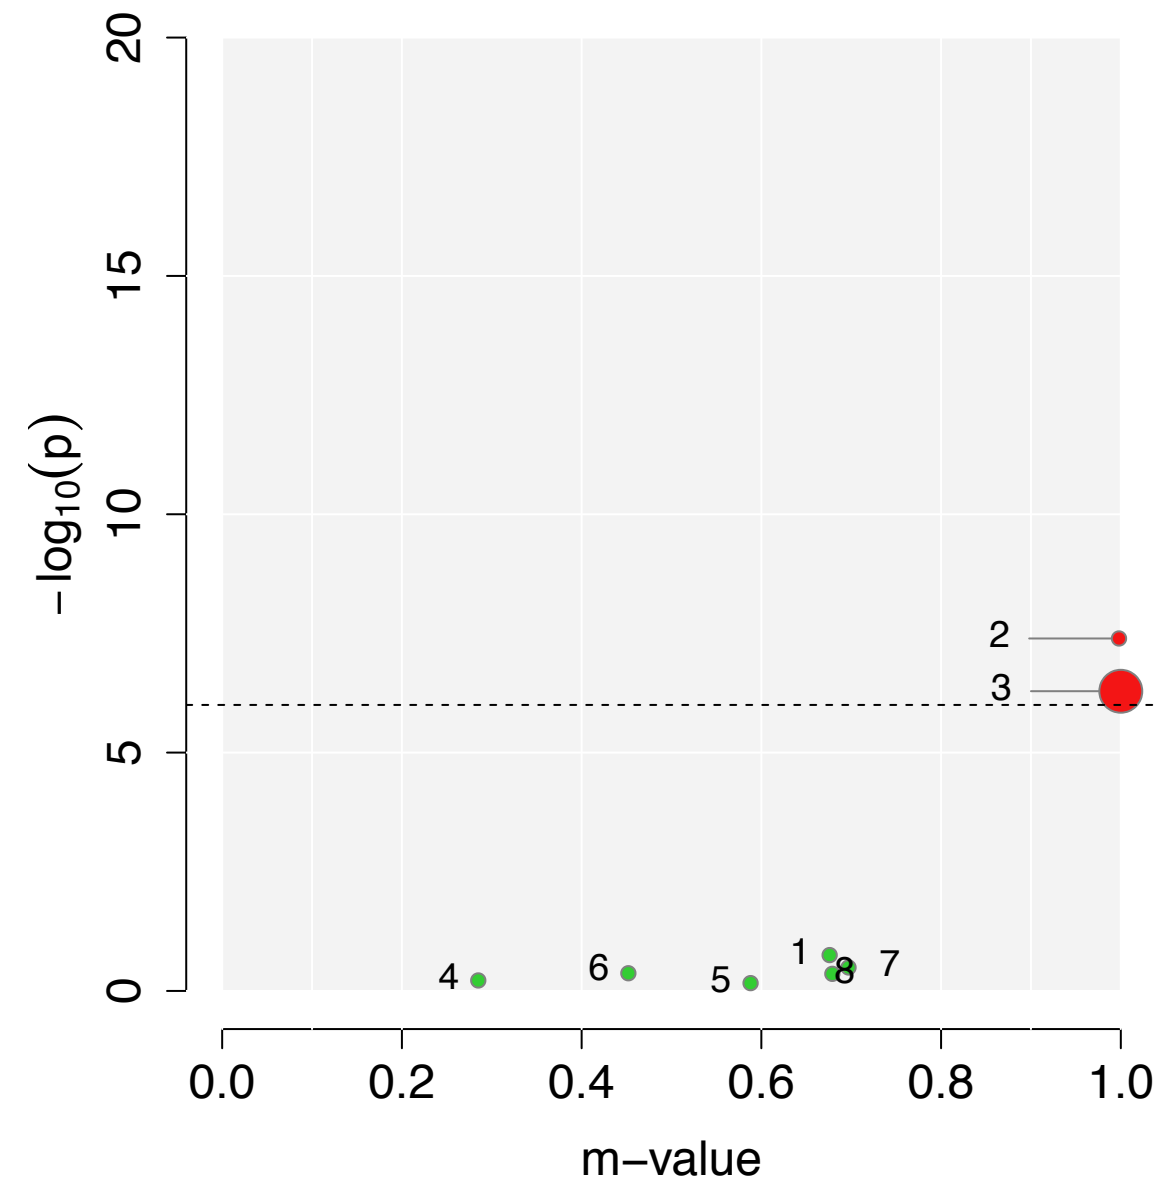

rs247910 (Meta  $P = 2.69 \times 10^{-9}$ )

Gene : *TMEM161B*

GWAS P-value

- 0.9569 ● 1.SCZ
- 0.6117 ● 2.BIP
- $1.28 \times 10^{-10}$  ● 3.MD
- 0.0013 ● 4.ASD
- $6.34 \times 10^{-6}$  ● 5.ADHD
- 0.1899 ● 6.TS
- 0.1783 ● 7.ANO
- 0.1837 ● 8.OCD

FE summary

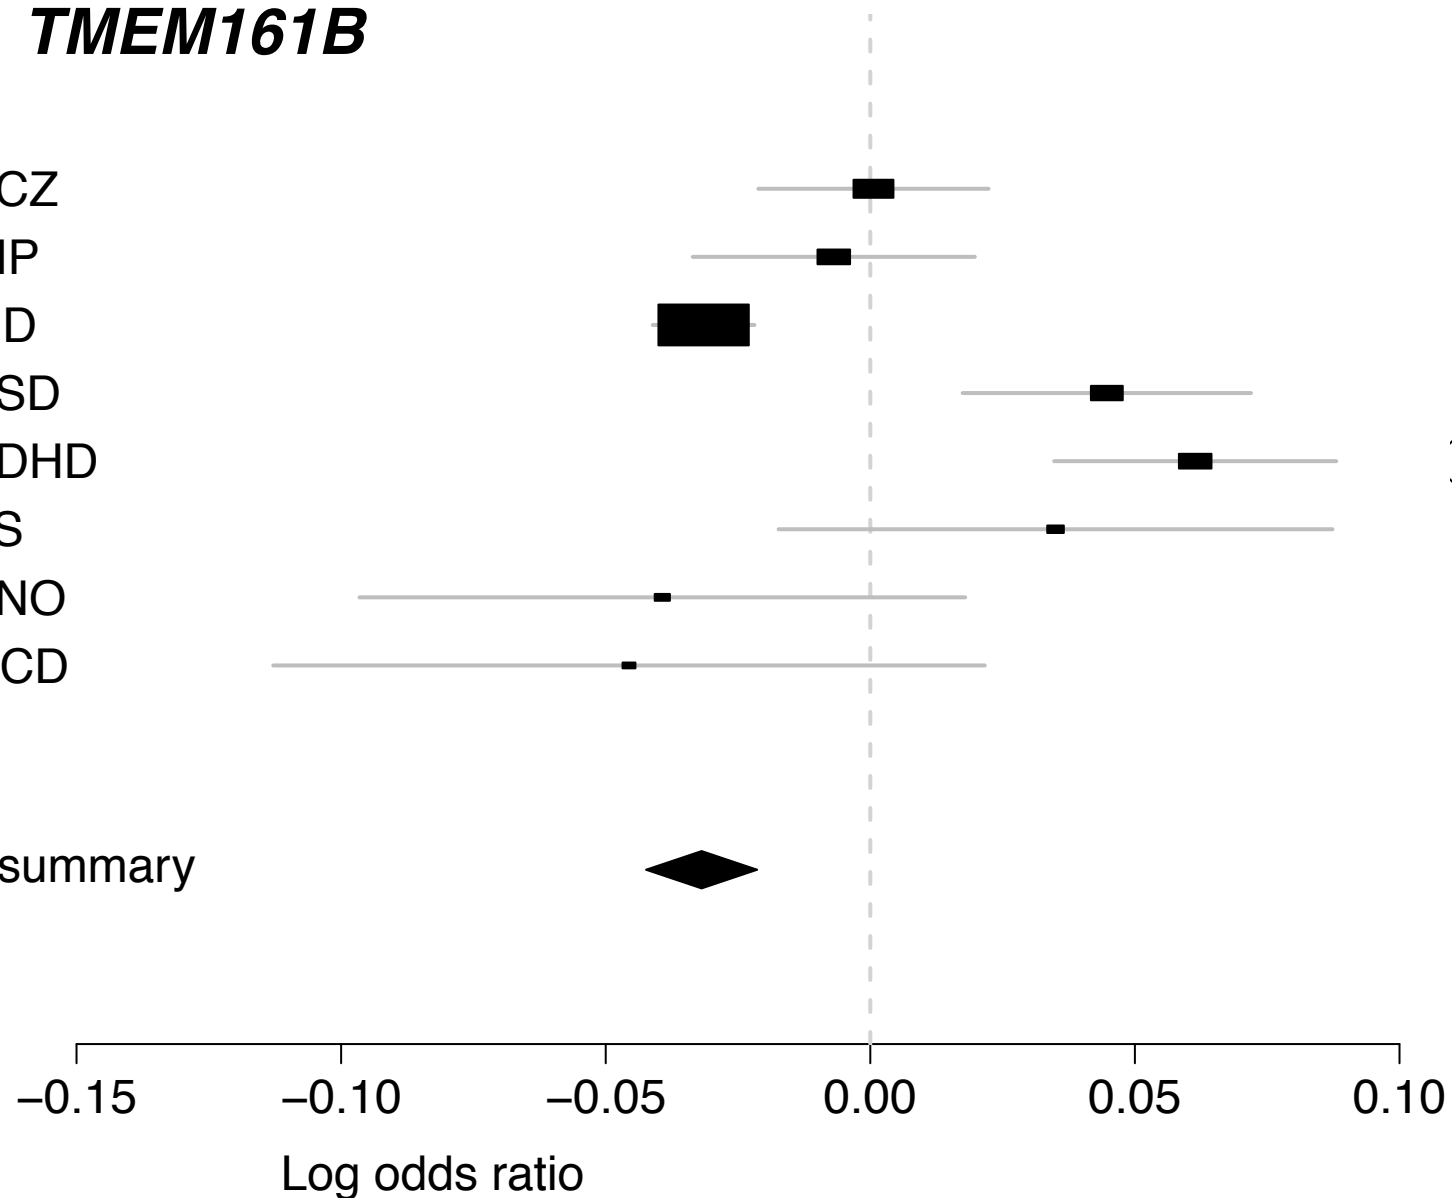

PM-Plot

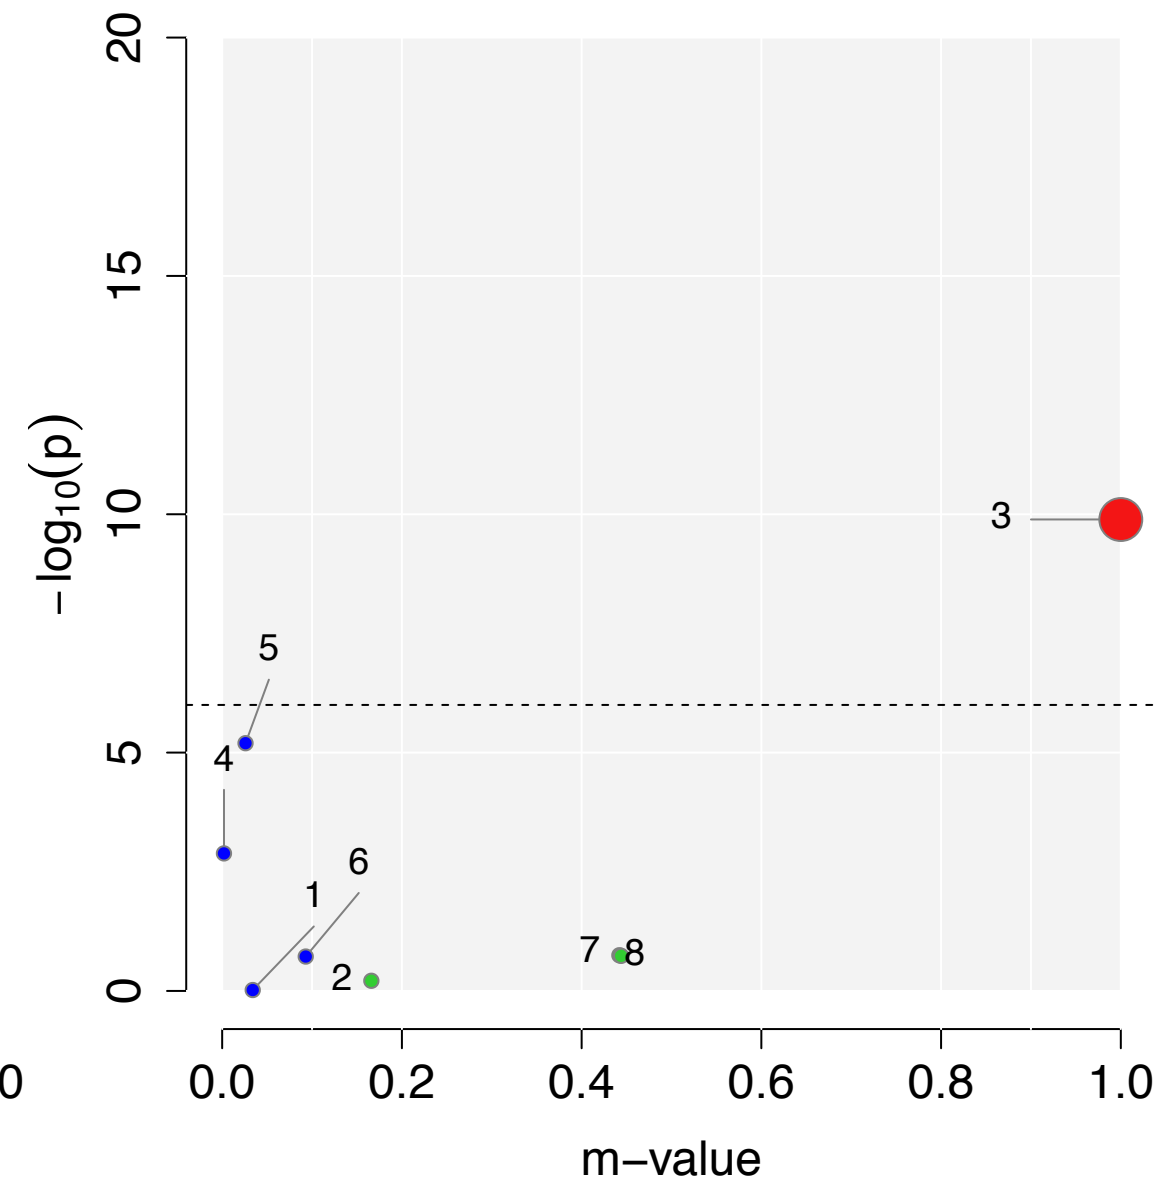

rs301799 (Meta  $P = 1.69 \times 10^{-8}$ )

Gene : *RERE*, *SLC45A1*

GWAS P-value

- 6.91 x 10<sup>-7</sup> ● 1.SCZ
- 0.5613 ● 2.BIP
- 3.38 x 10<sup>-8</sup> ● 3.MD
- 0.1411 ● 4.ASD
- 0.1888 ● 5.ADHD
- 0.0016 ● 6.TS
- 0.1181 ● 7.ANO
- 0.0233 ● 8.OCD

FE summary

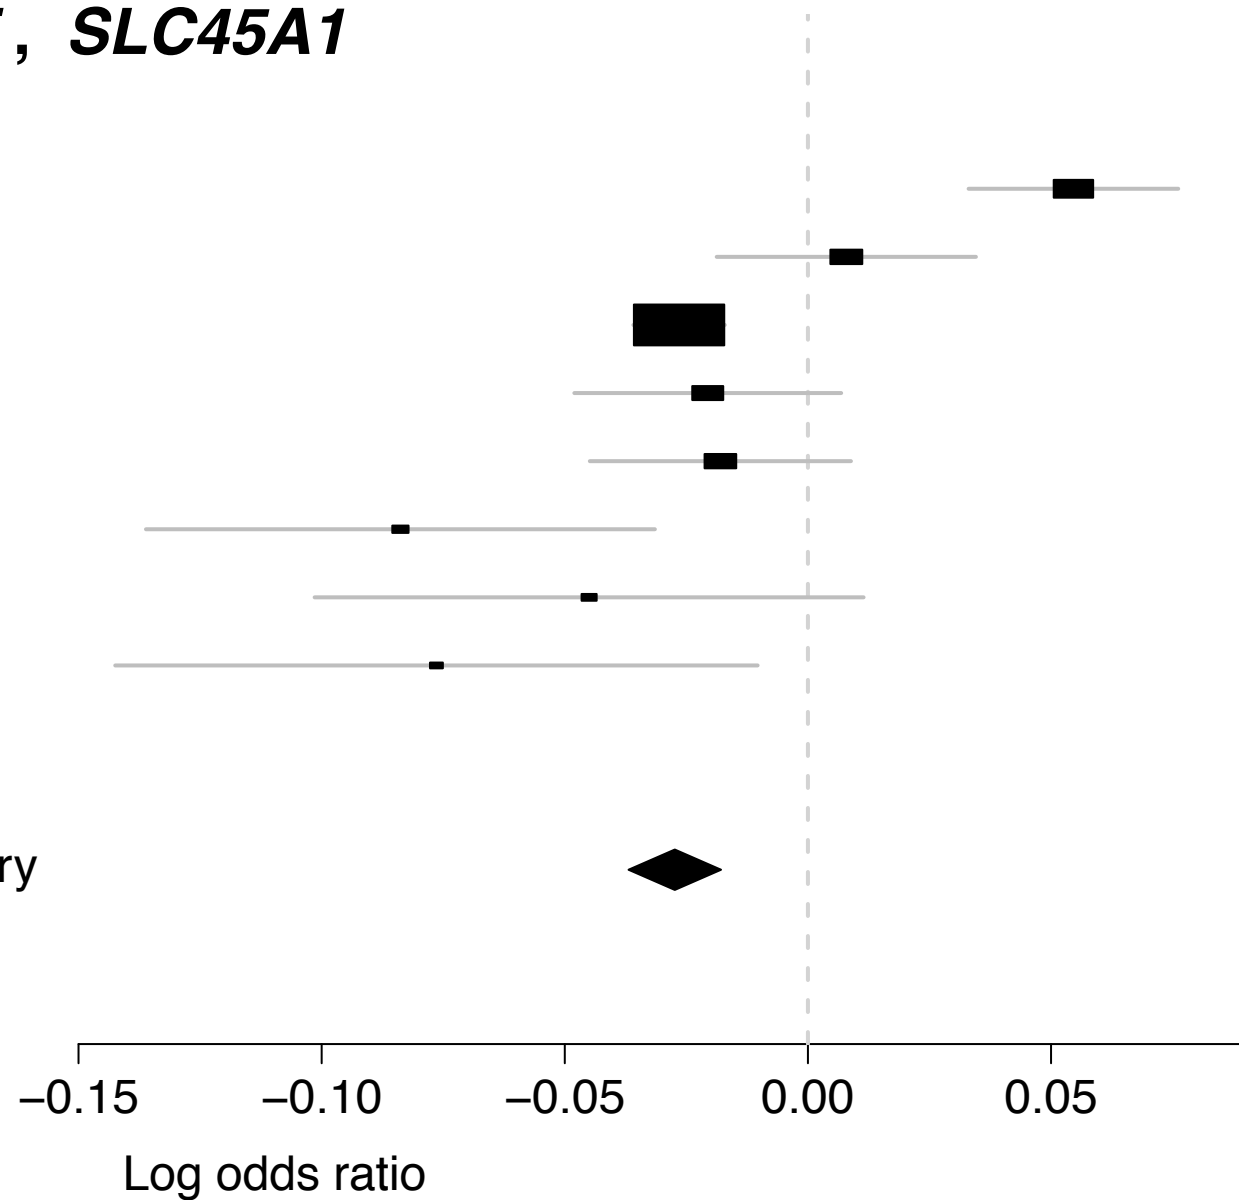

PM-Plot

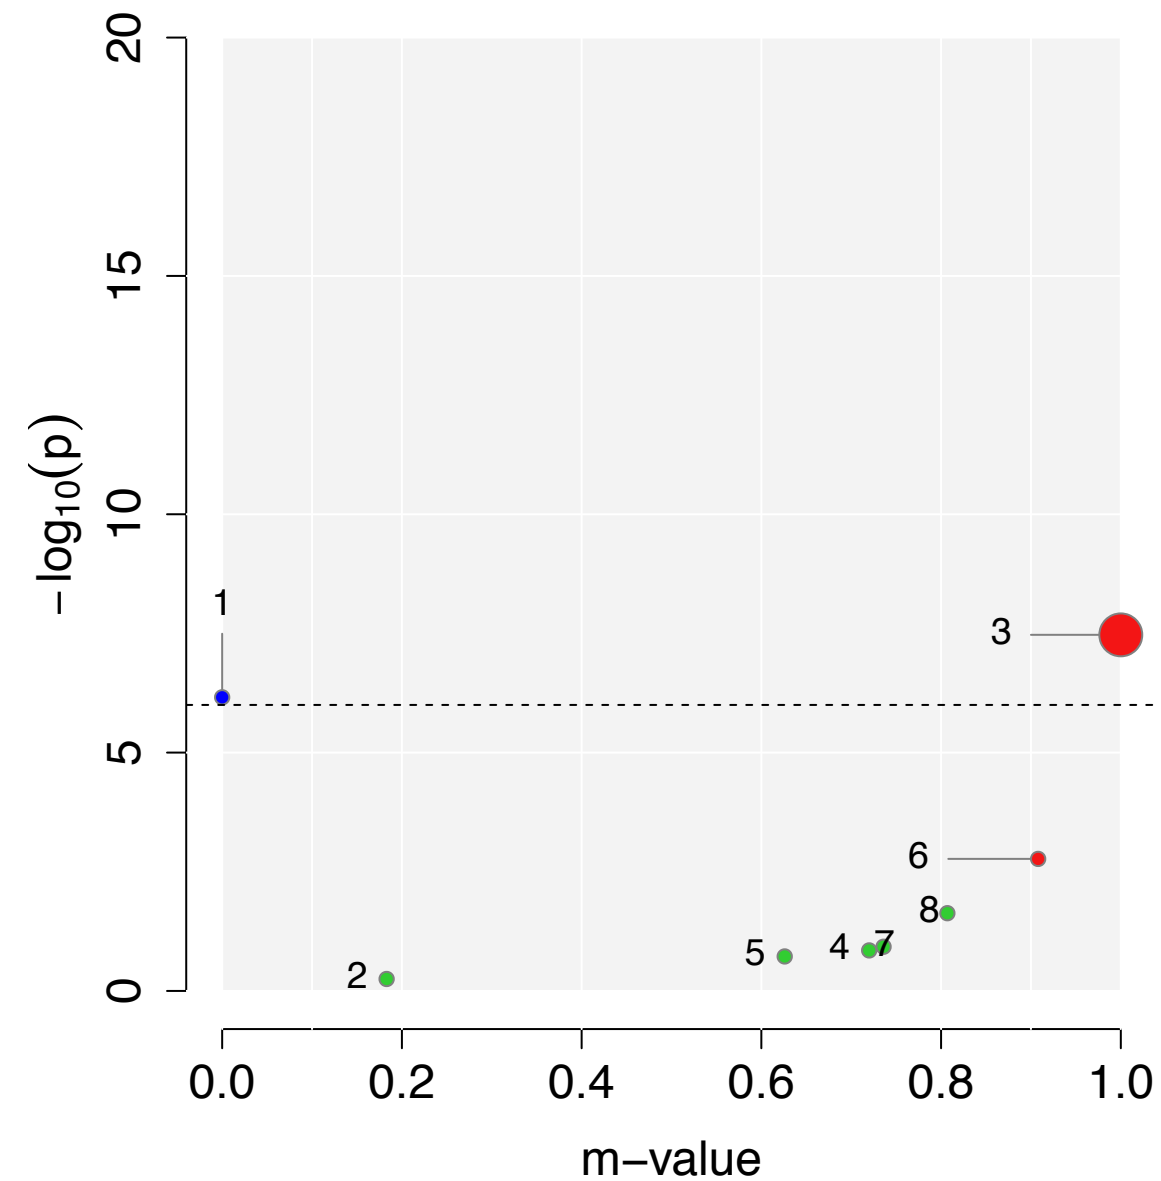

# rs395138 (Meta $P = 1.03 \times 10^{-8}$ )

Gene : *ENOX1*

## GWAS P-value

- 0.0005 ● 1.SCZ
- 0.1196 ● 2.BIP
- $4.70 \times 10^{-8}$  ● 3.MD
- 0.9349 ● 4.ASD
- 0.0946 ● 5.ADHD
- 0.2091 ● 6.TS
- 0.2456 ● 7.ANO
- 0.2081 ● 8.OCD

FE summary

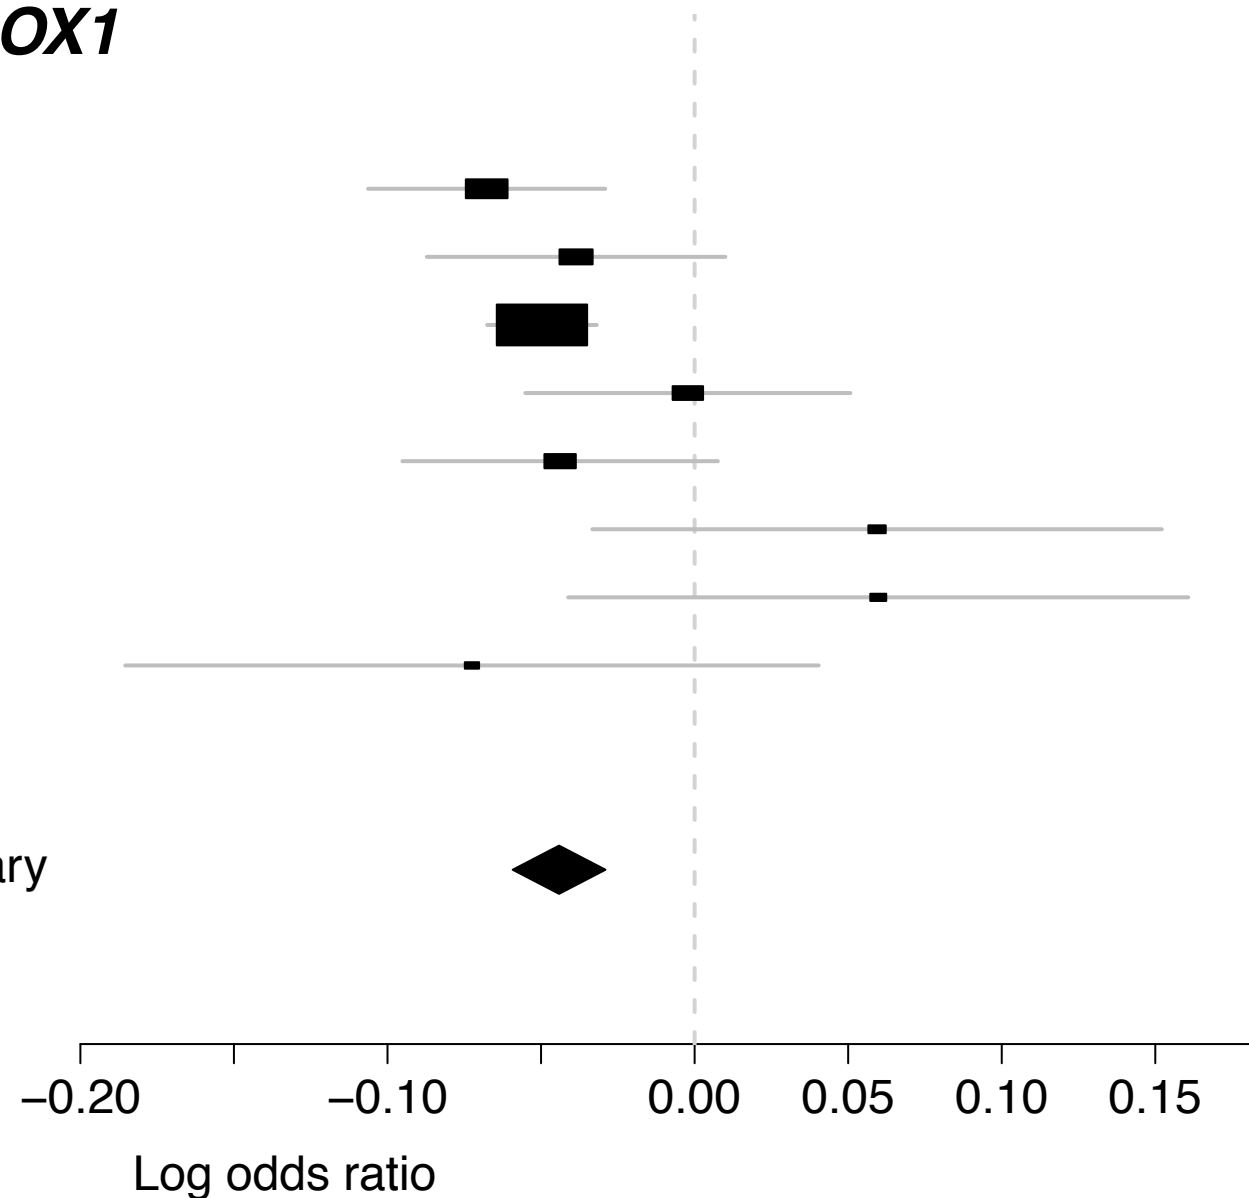

## PM-Plot

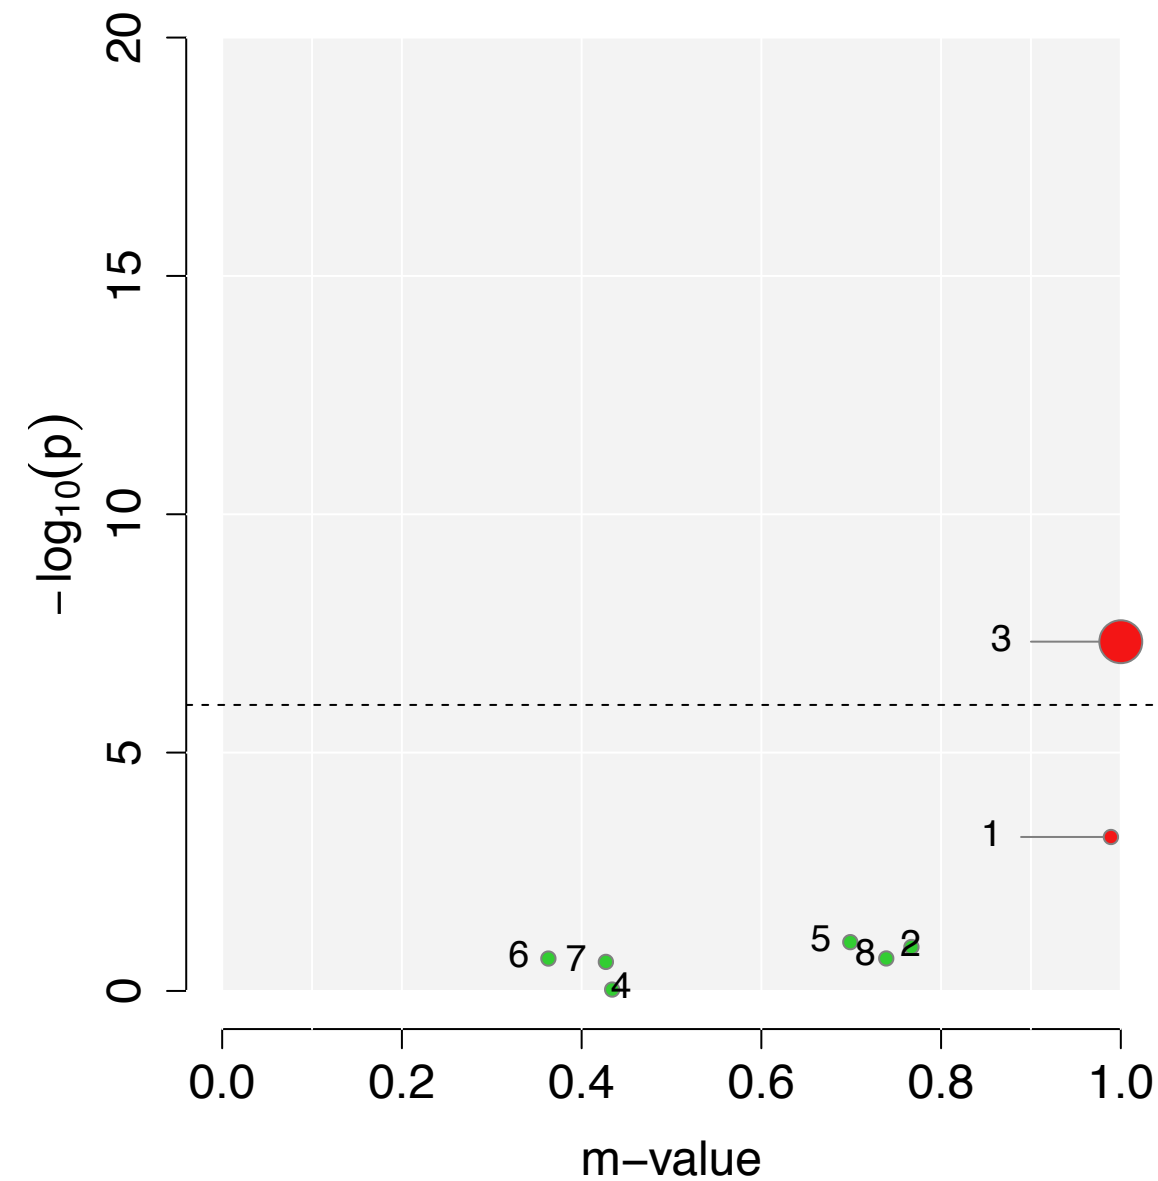

# rs631399 (Meta $P = 6.6e \times 10^{-11}$ )

Gene : (>200kb)

## GWAS P-value

- 0.3915 ● 1.SCZ
- 0.7224 ● 2.BIP
- $5.21 \times 10^{-12}$  ● 3.MD
- 0.4672 ● 4.ASD
- 0.0656 ● 5.ADHD
- 0.2382 ● 6.TS
- 0.1053 ● 7.ANO
- 0.1307 ● 8.OCD

FE summary

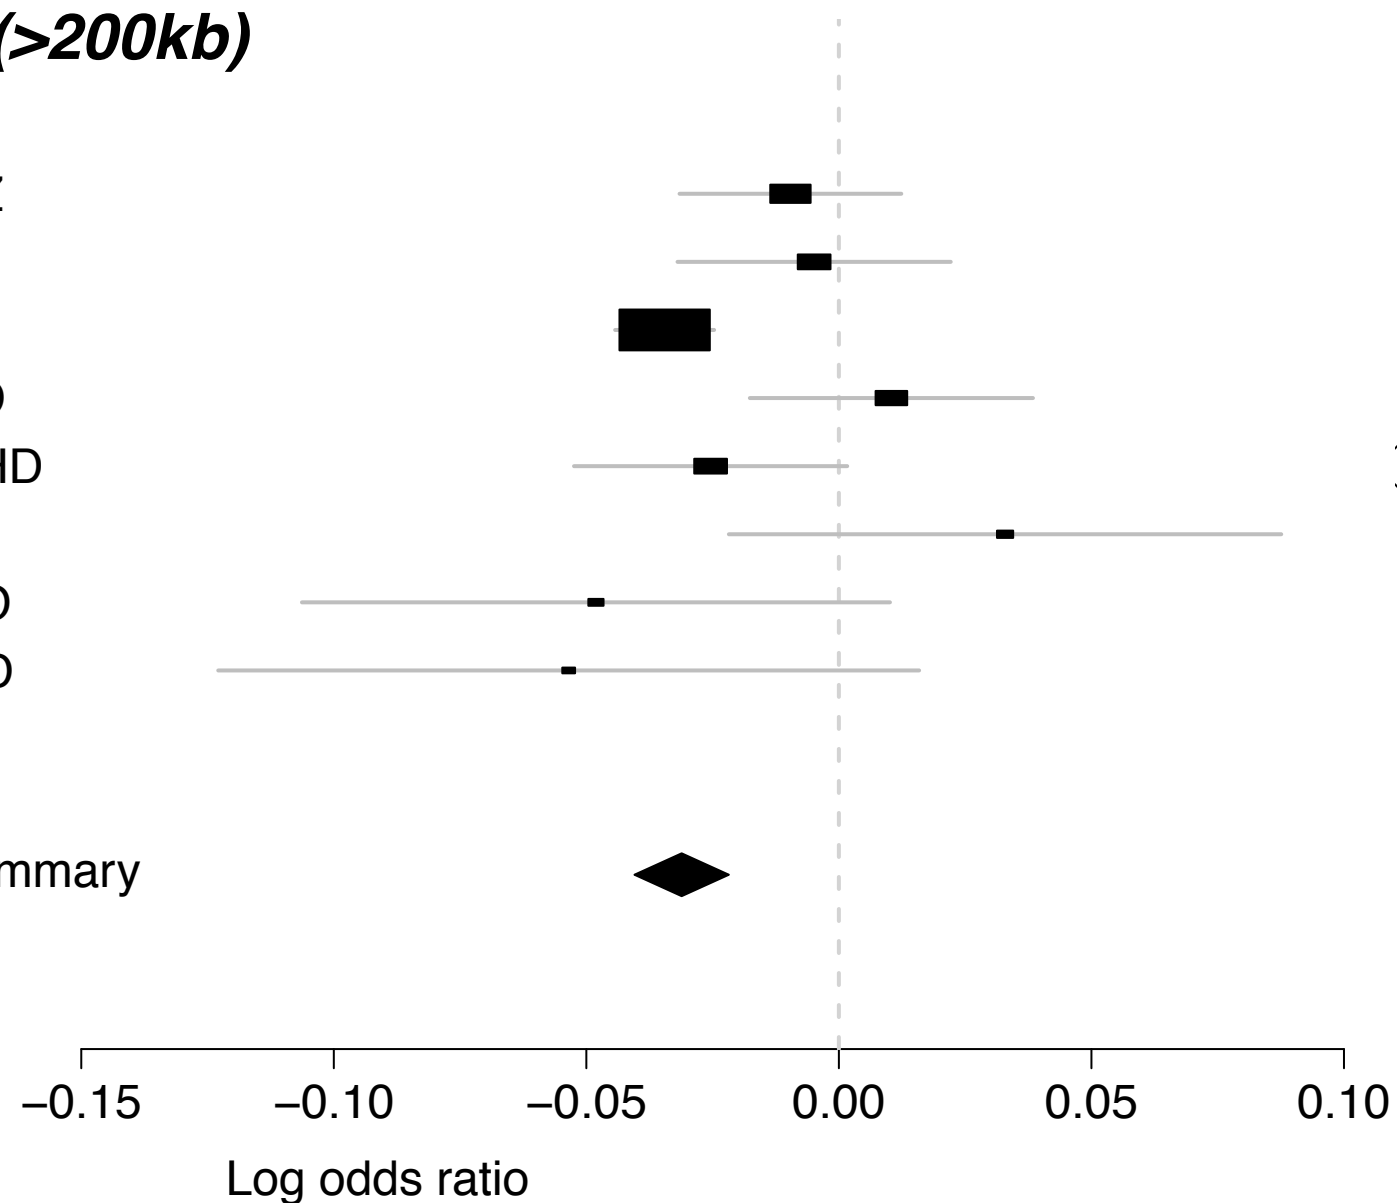

## PM-Plot

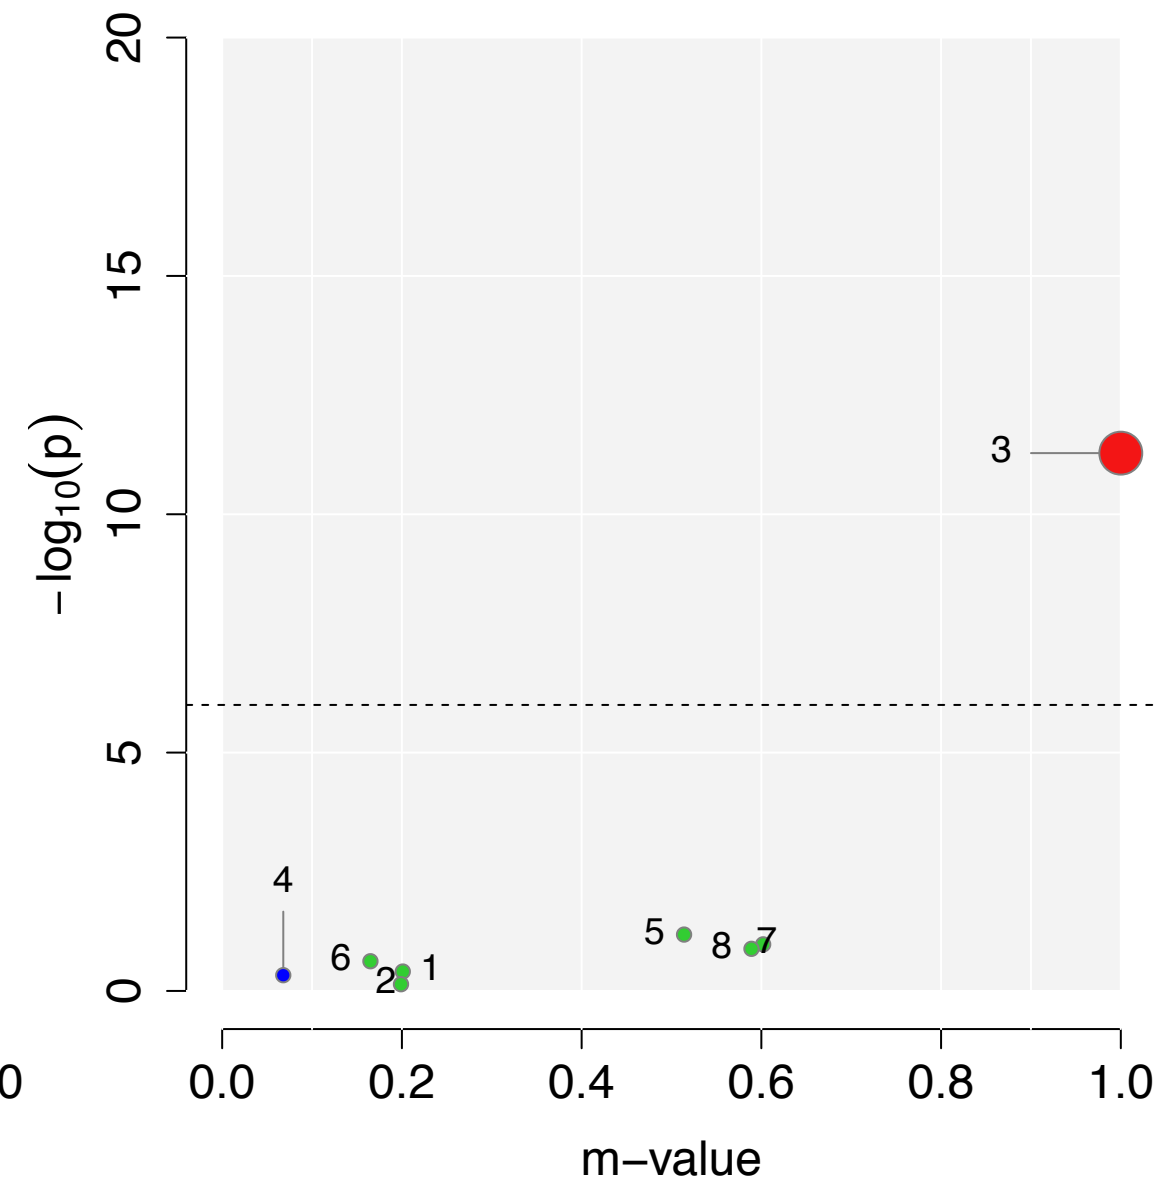

rs732381 (Meta  $P = 6.87 \times 10^{-11}$ )

Gene : *CACNA1I*, *ENTHD1*

GWAS P-value

- 2.11 x 10<sup>-10</sup> ● 1.SCZ
- 1.87 x 10<sup>-5</sup> ● 2.BIP
- 0.0026 ● 3.MD
- 0.7357 ● 4.ASD
- 0.9892 ● 5.ADHD
- 0.3788 ● 6.TS
- 0.6395 ● 7.ANO
- 0.1040 ● 8.OCD

FE summary

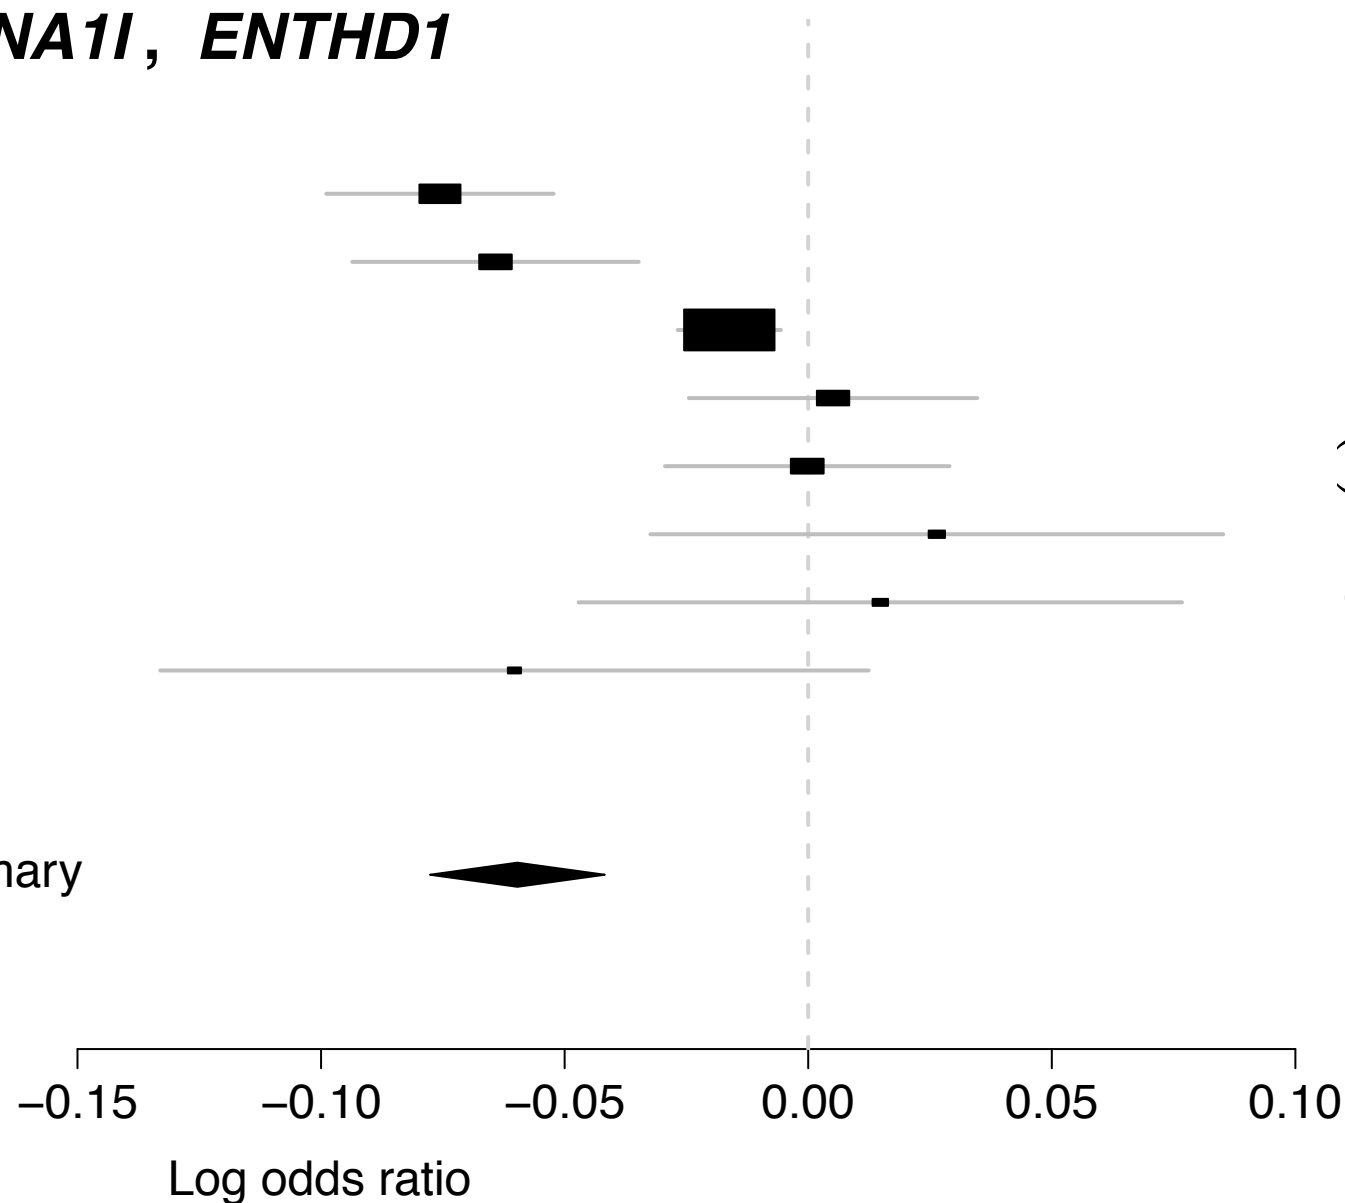

PM-Plot

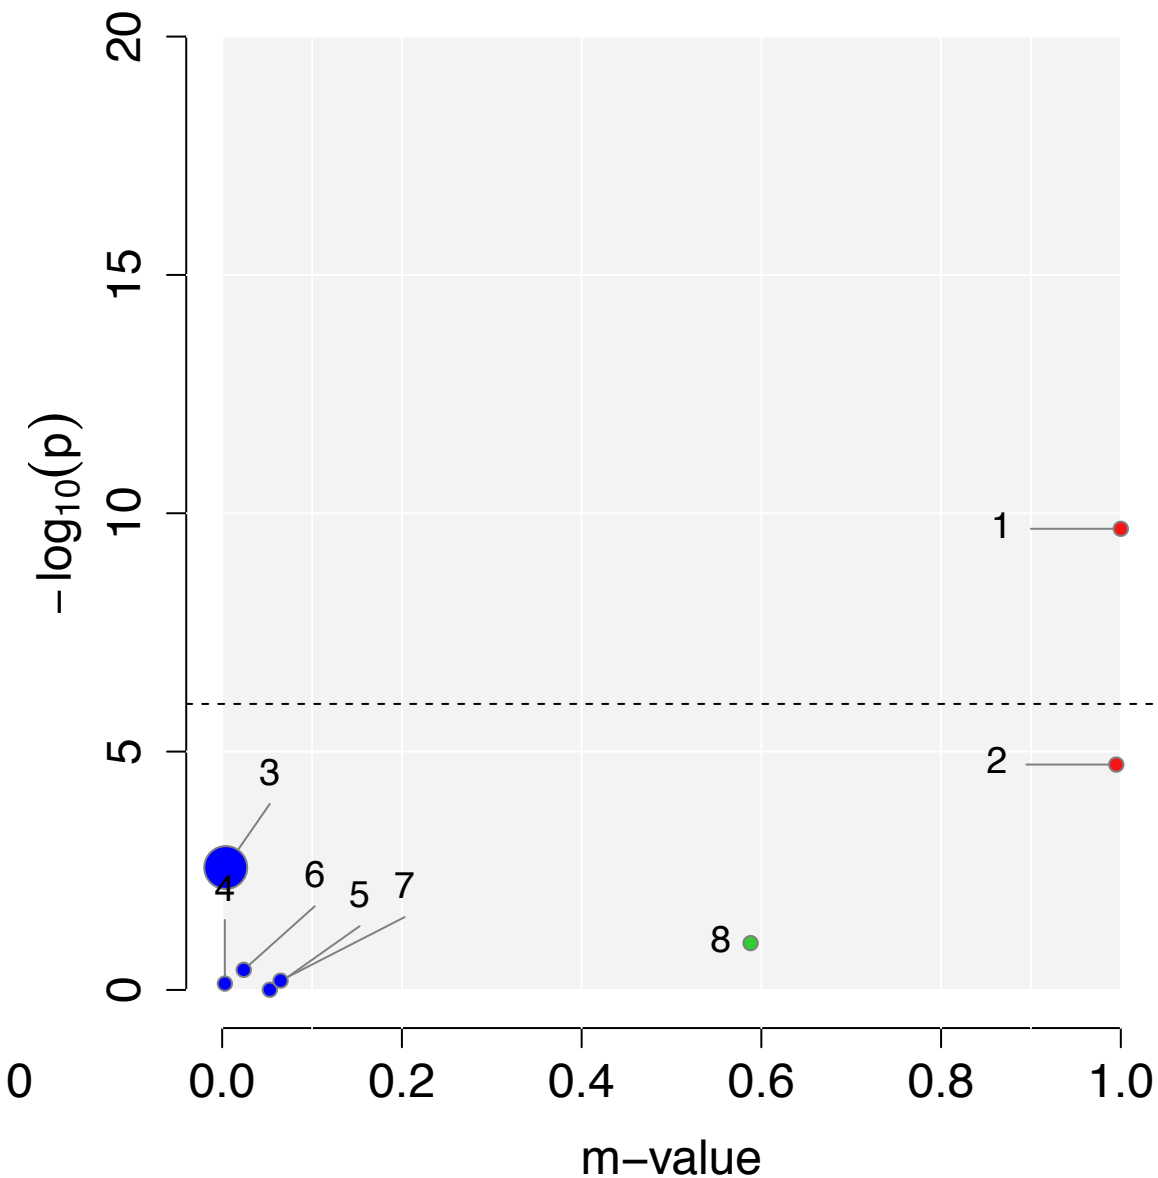



# rs746839 (Meta $P = 2.94 \times 10^{-8}$ )

Gene : *MROH5*

## GWAS P-value

- $3.46 \times 10^{-5}$  ● 1.SCZ
- 0.9886 ● 2.BIP
- 0.0843 ● 3.MD
- $4.36 \times 10^{-6}$  ● 4.ASD
- 0.9340 ● 5.ADHD
- 0.2594 ● 6.TS
- 0.0818 ● 7.ANO
- 0.3752 ● 8.OCD

FE summary

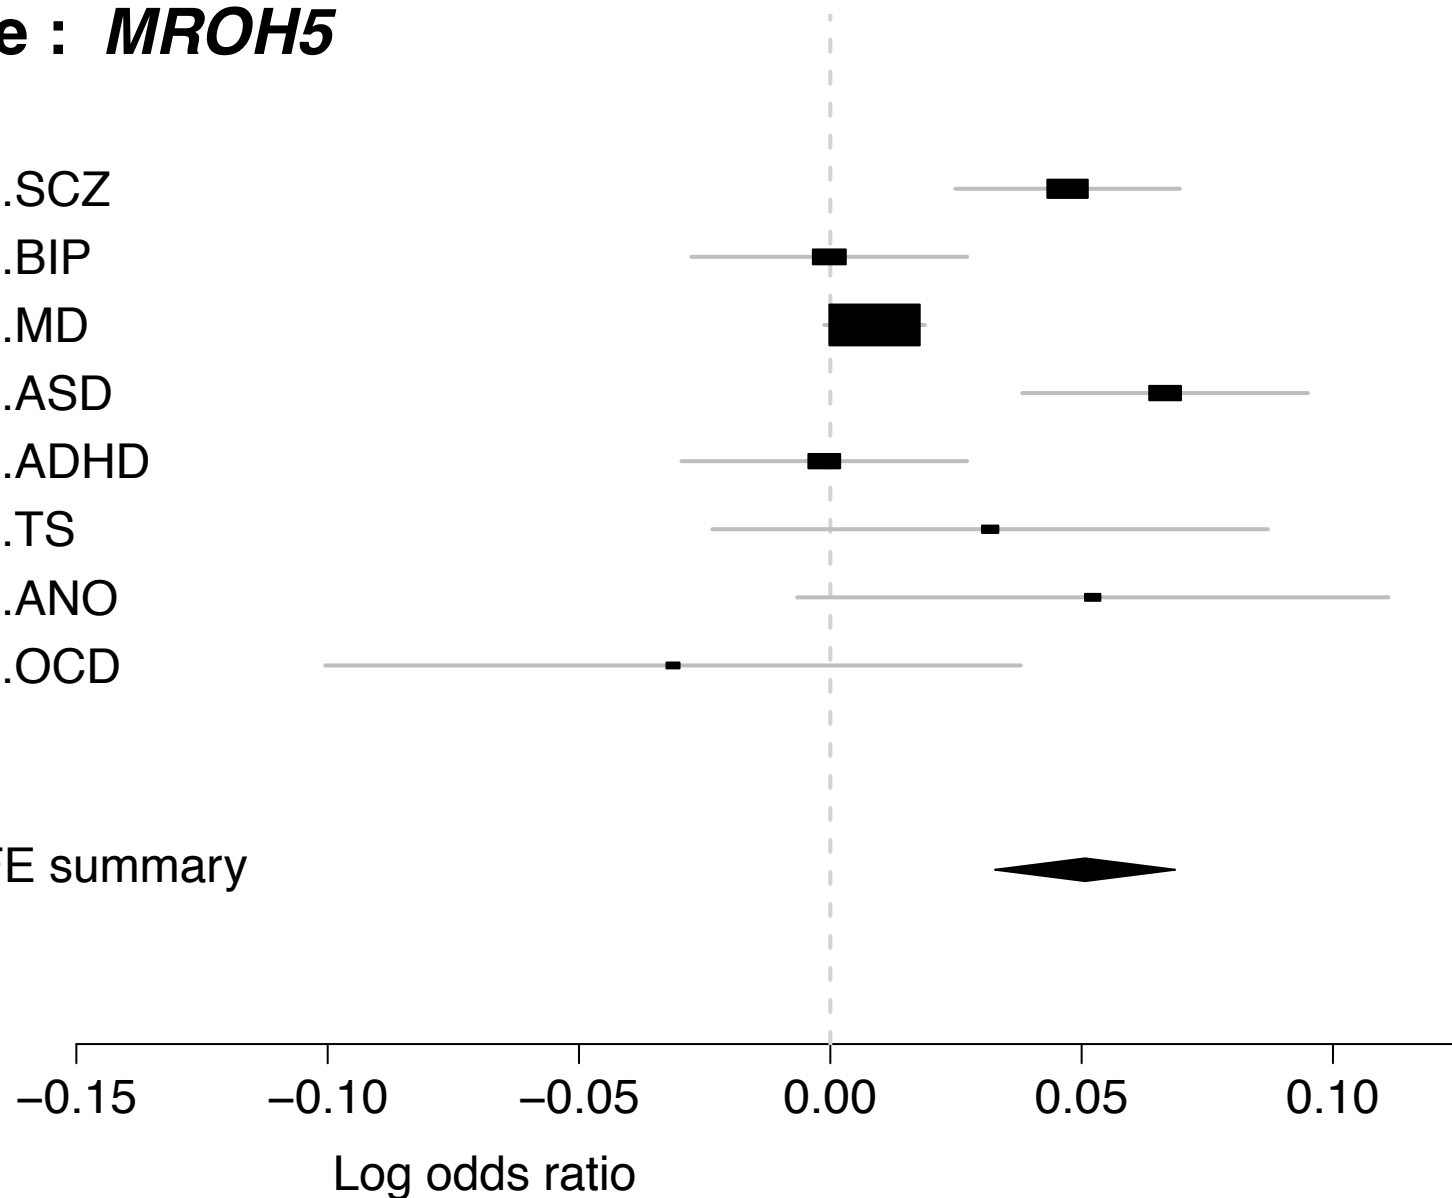

## PM-Plot

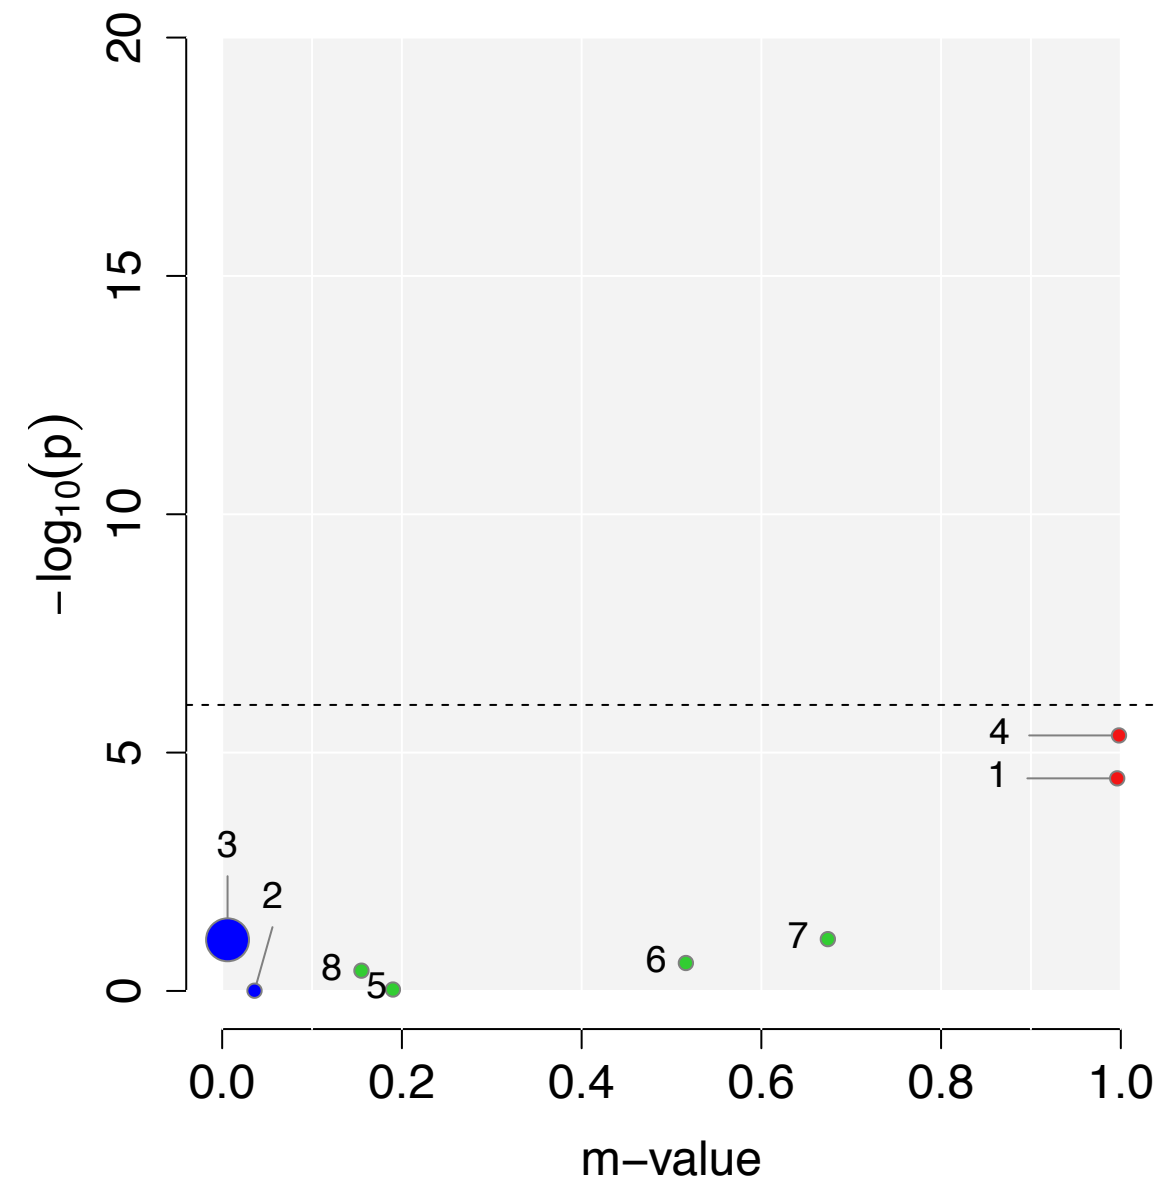

rs760648 (Meta  $P = 1.08 \times 10^{-8}$ )

Gene : *TCF20*, *CYP2D6*

GWAS P-value

- 1.32 x 10<sup>-10</sup> ● 1.SCZ
- 0.0058 ● 2.BIP
- 0.0020 ● 3.MD
- 0.0418 ● 4.ASD
- 0.4099 ● 5.ADHD
- 0.3636 ● 6.TS
- 0.1483 ● 7.ANO
- 0.5519 ● 8.OCD

FE summary

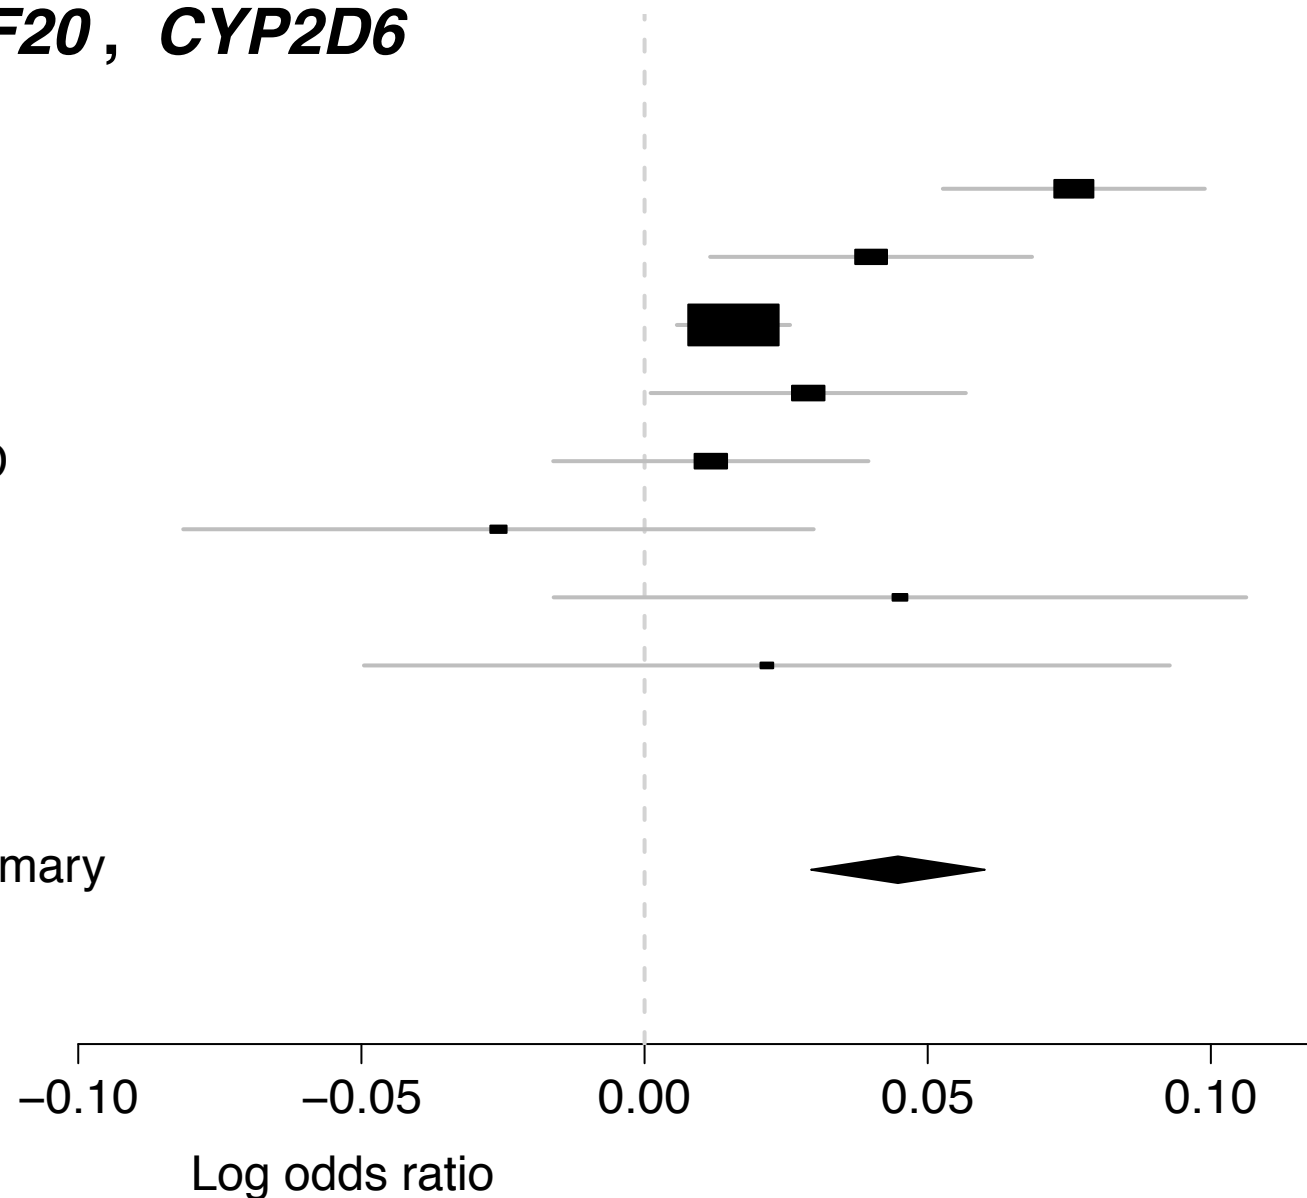

PM-Plot

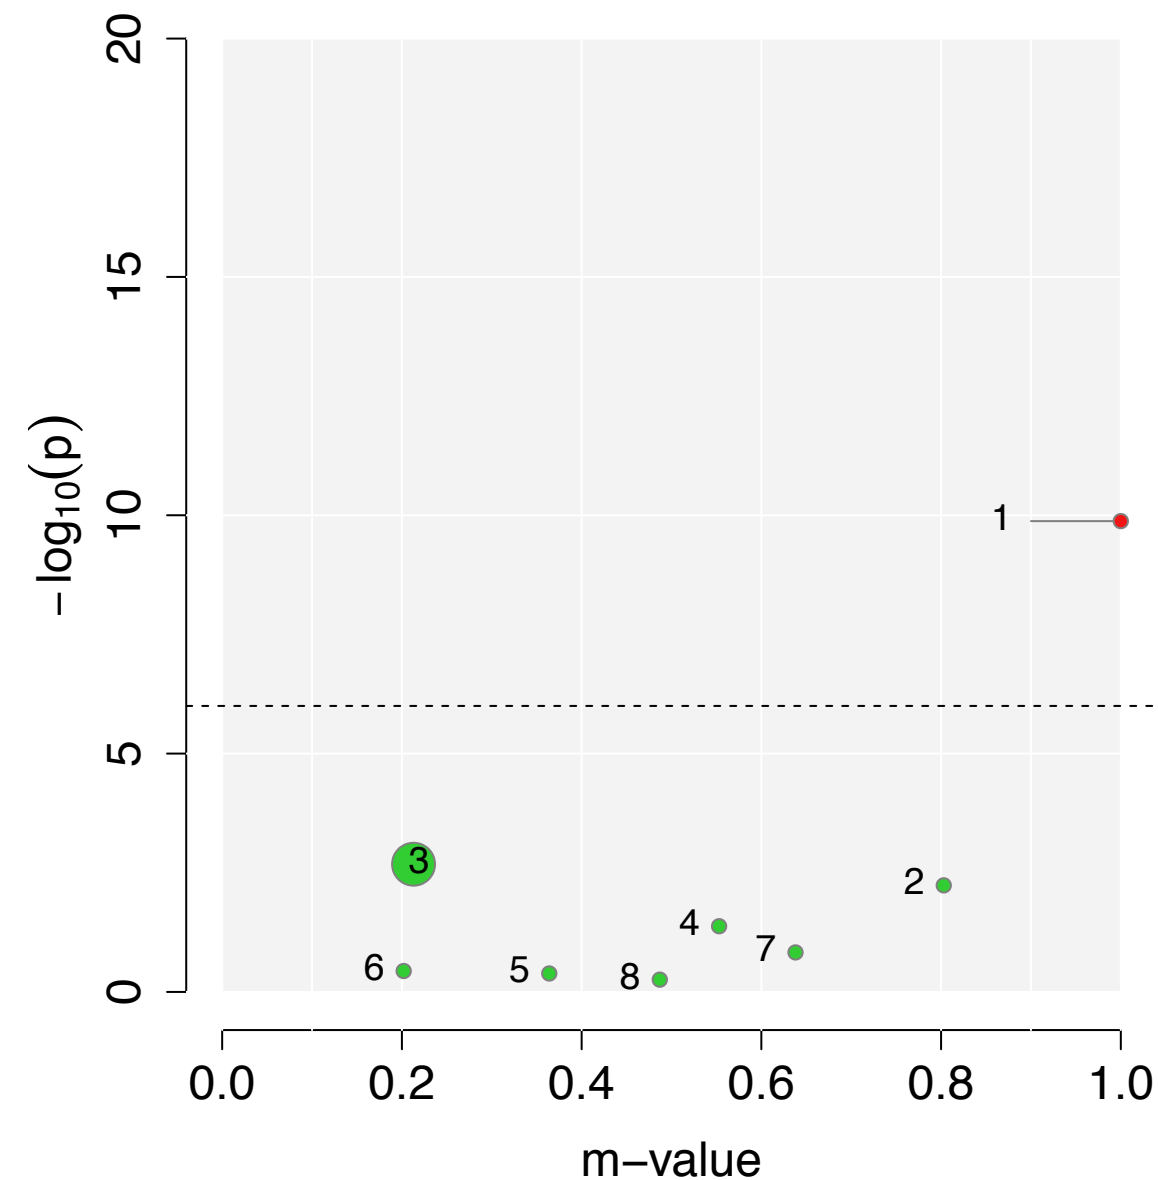

rs778353 (Meta  $P = 2.06 \times 10^{-11}$ )

Gene : *NGEF*, *C2orf82*

GWAS P-value

- 1.60 x 10<sup>0</sup> ● 1.SCZ
- 1.69 x 10<sup>-5</sup> ● 2.BIP
- 0.2353 ● 3.MD
- 0.1101 ● 4.ASD
- 0.2931 ● 5.ADHD
- 0.0025 ● 6.TS
- 0.0124 ● 7.ANO
- 0.9953 ● 8.OCD

FE summary

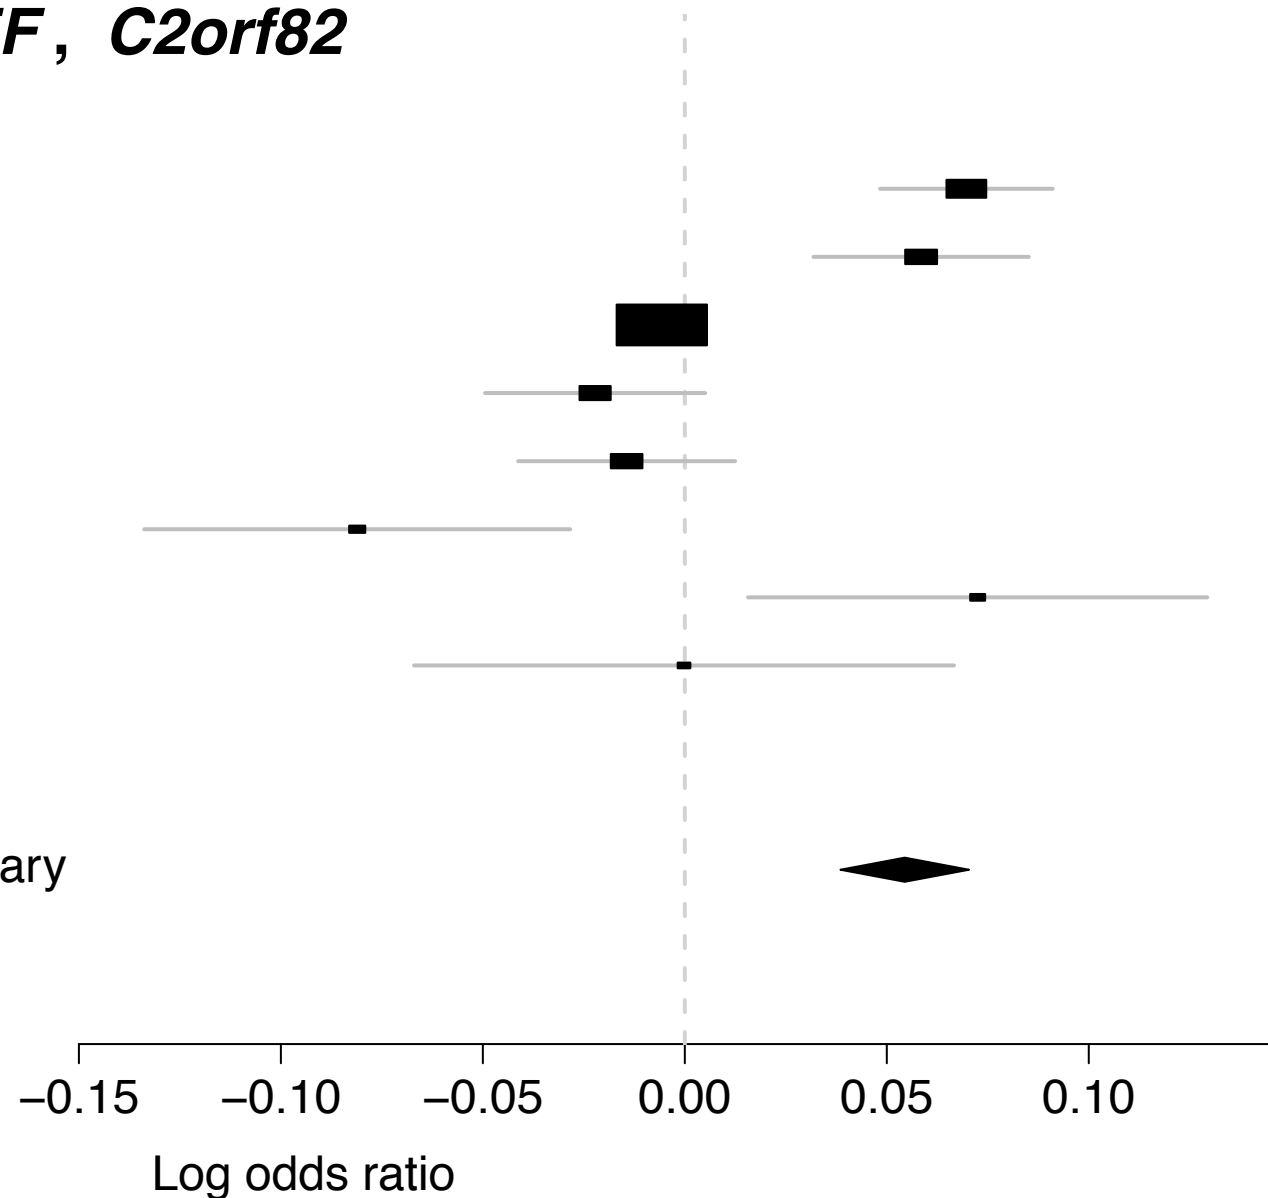

PM-Plot

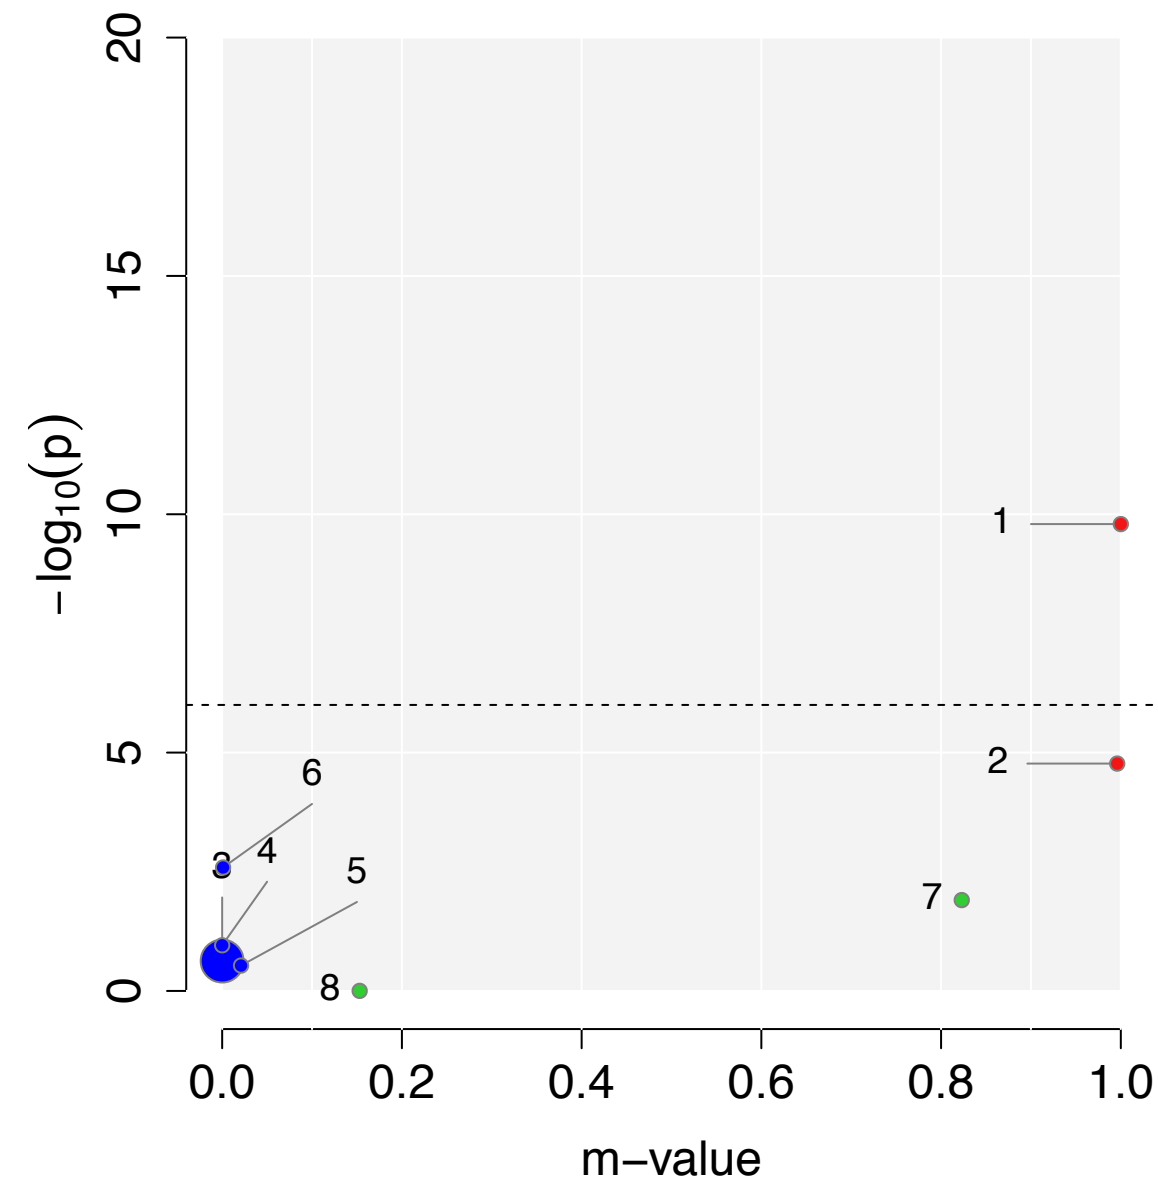

rs832190 (Meta  $P = 3.6e \times 10^{-9}$ )

Gene : *THOC7*, *ATXN7*

GWAS P-value

- 6.18 x 10<sup>-10</sup> ● 1.SCZ
- 0.0055 ● 2.BIP
- 0.4596 ● 3.MD
- 0.0696 ● 4.ASD
- 0.3673 ● 5.ADHD
- 0.9885 ● 6.TS
- 0.2214 ● 7.ANO
- 0.0110 ● 8.OCD

FE summary

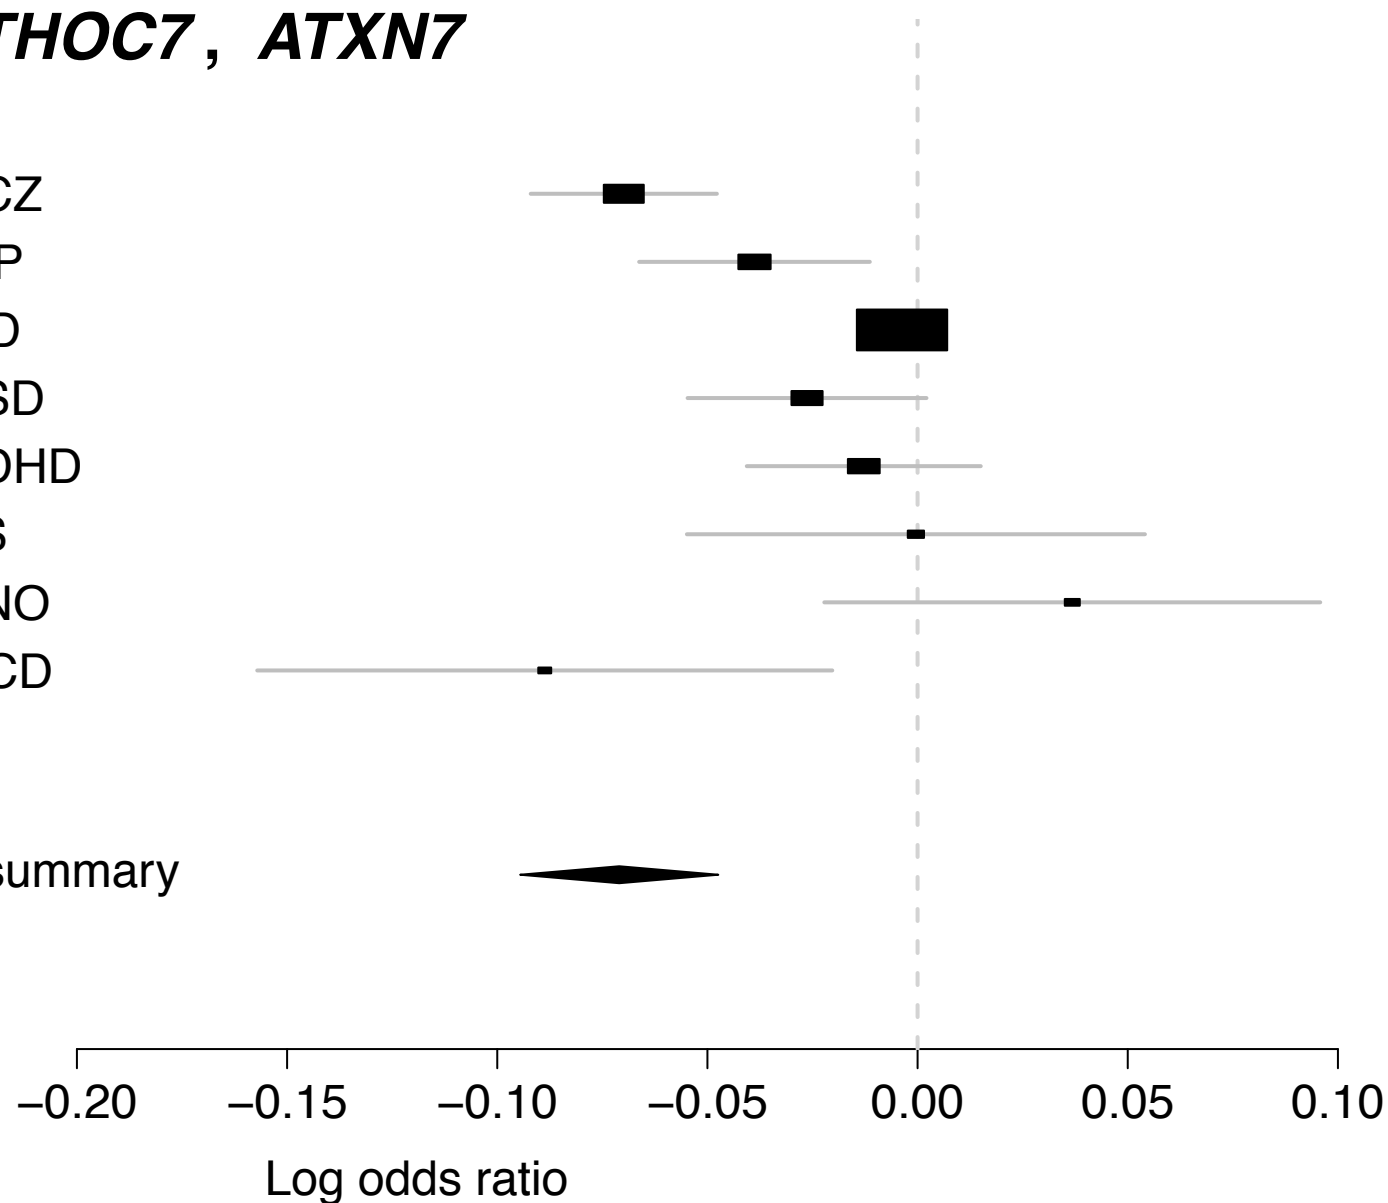

PM-Plot

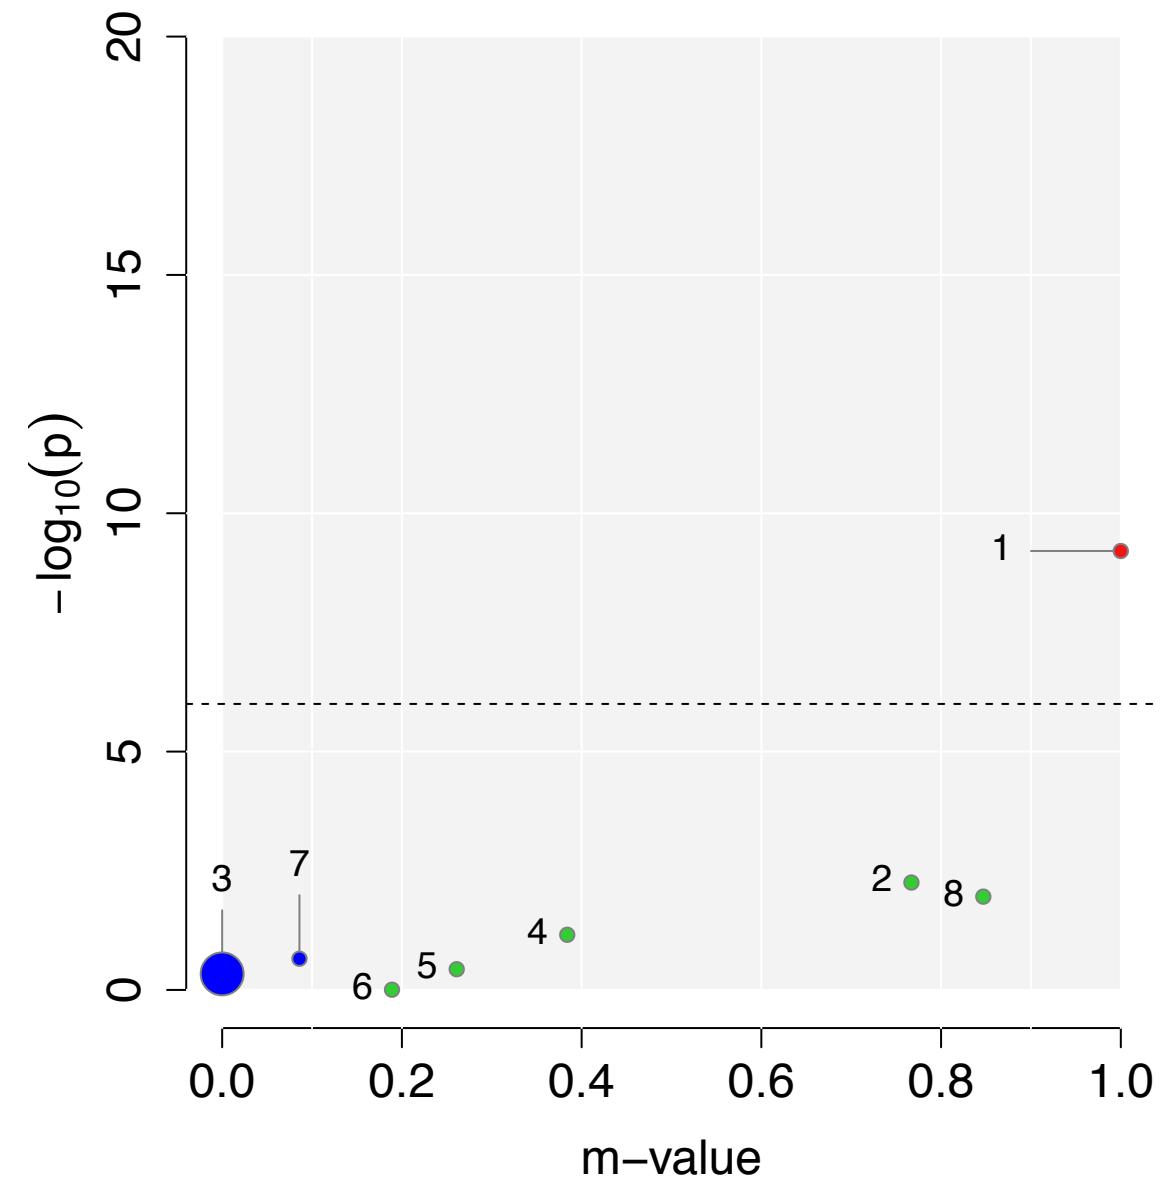

rs880090 (Meta  $P = 1.15 \times 10^{-9}$ )

Gene : *GMIP*, *LPAR2*

GWAS P-value

- 9.90 x 10<sup>-7</sup> ● 1.SCZ
- 2.05 x 10<sup>-6</sup> ● 2.BIP
- 0.3177 ● 3.MD
- 0.0078 ● 4.ASD
- 0.4825 ● 5.ADHD
- 0.2028 ● 6.TS
- 0.2688 ● 7.ANO
- 0.1456 ● 8.OCD

FE summary

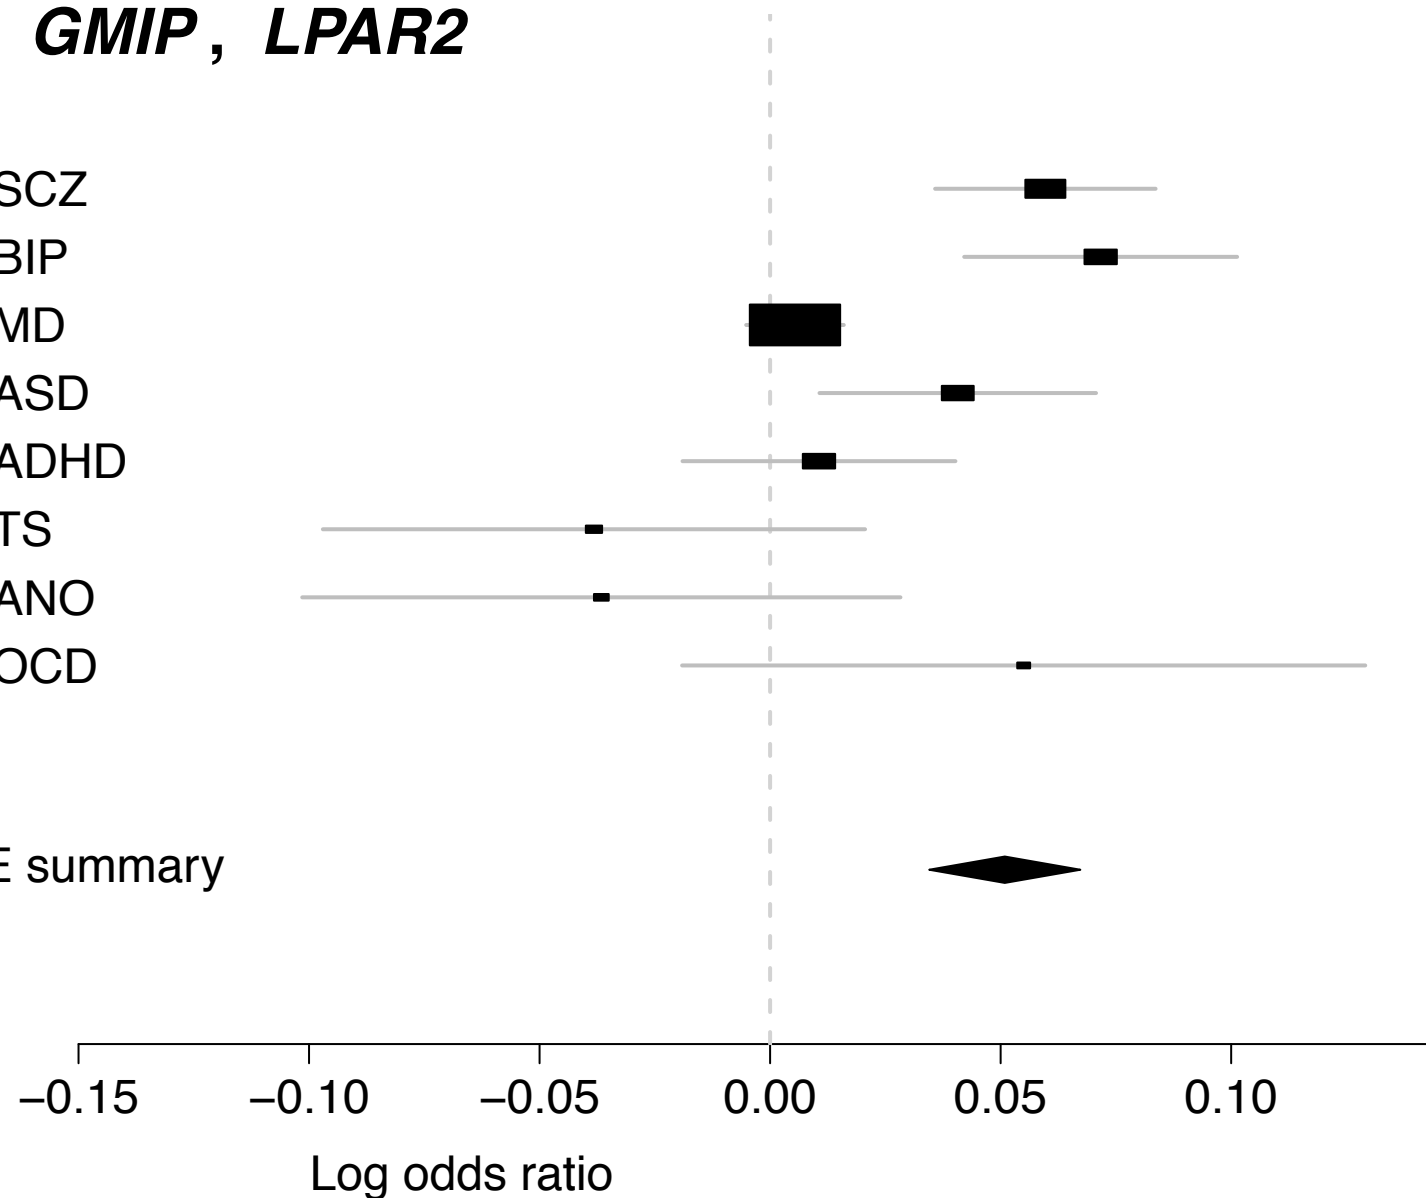

PM-Plot

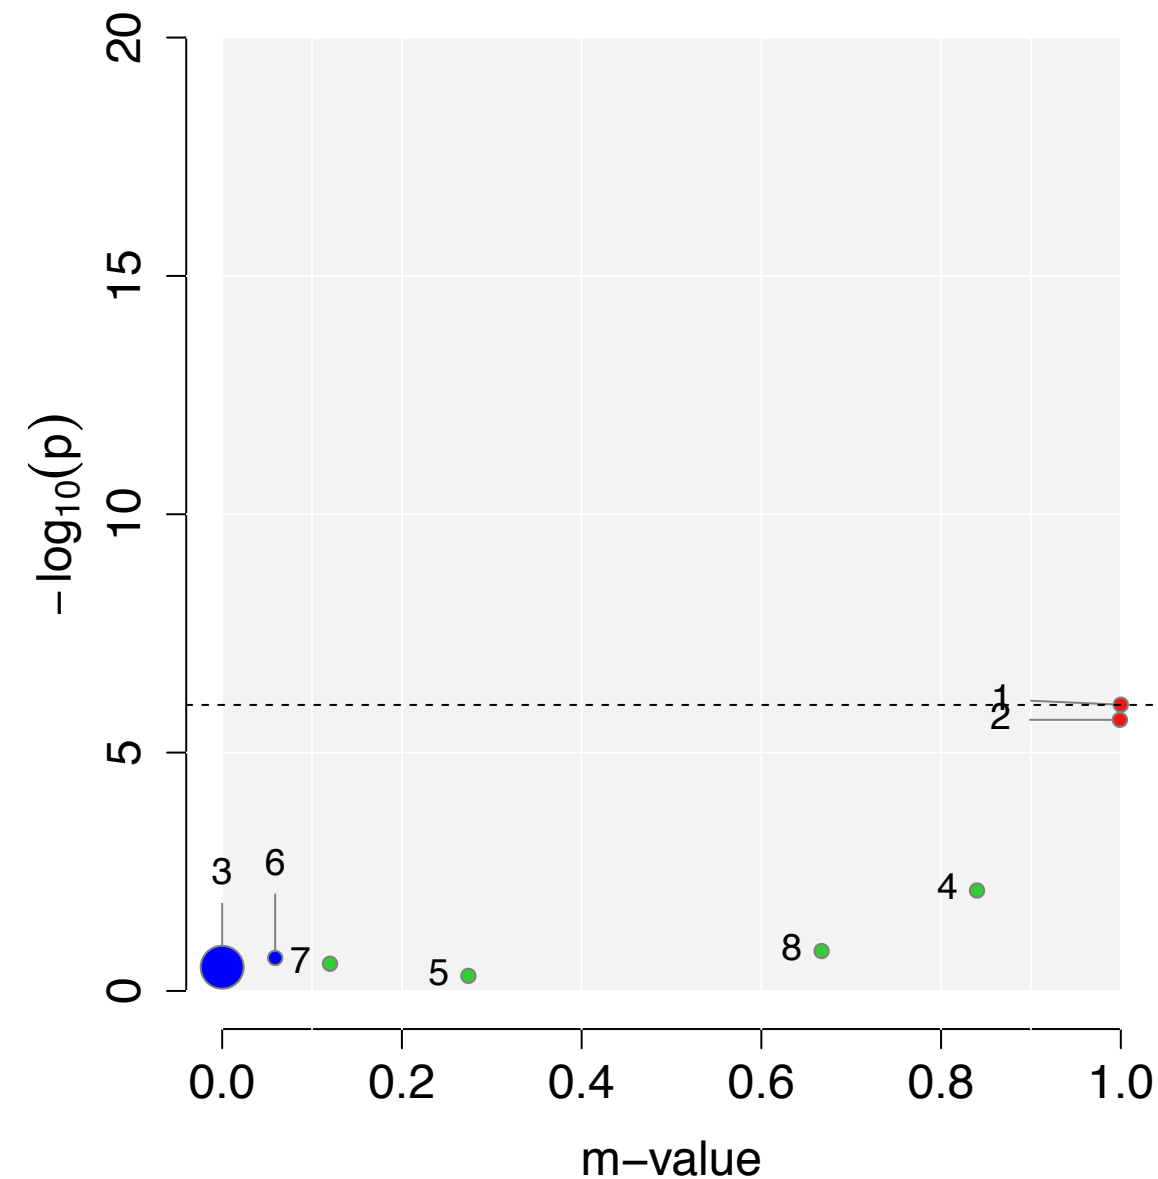

rs915057 (Meta  $P = 2.76 \times 10^{-9}$ )

Gene : *SYNE2*, *ESR2*

GWAS P-value

- 0.2128 ● 1.SCZ
- 0.9648 ● 2.BIP
- $9.26 \times 10^{-10}$  ● 3.MD
- 0.0674 ● 4.ASD
- 0.1099 ● 5.ADHD
- 0.2040 ● 6.TS
- 0.0173 ● 7.ANO
- 0.8569 ● 8.OCD

FE summary

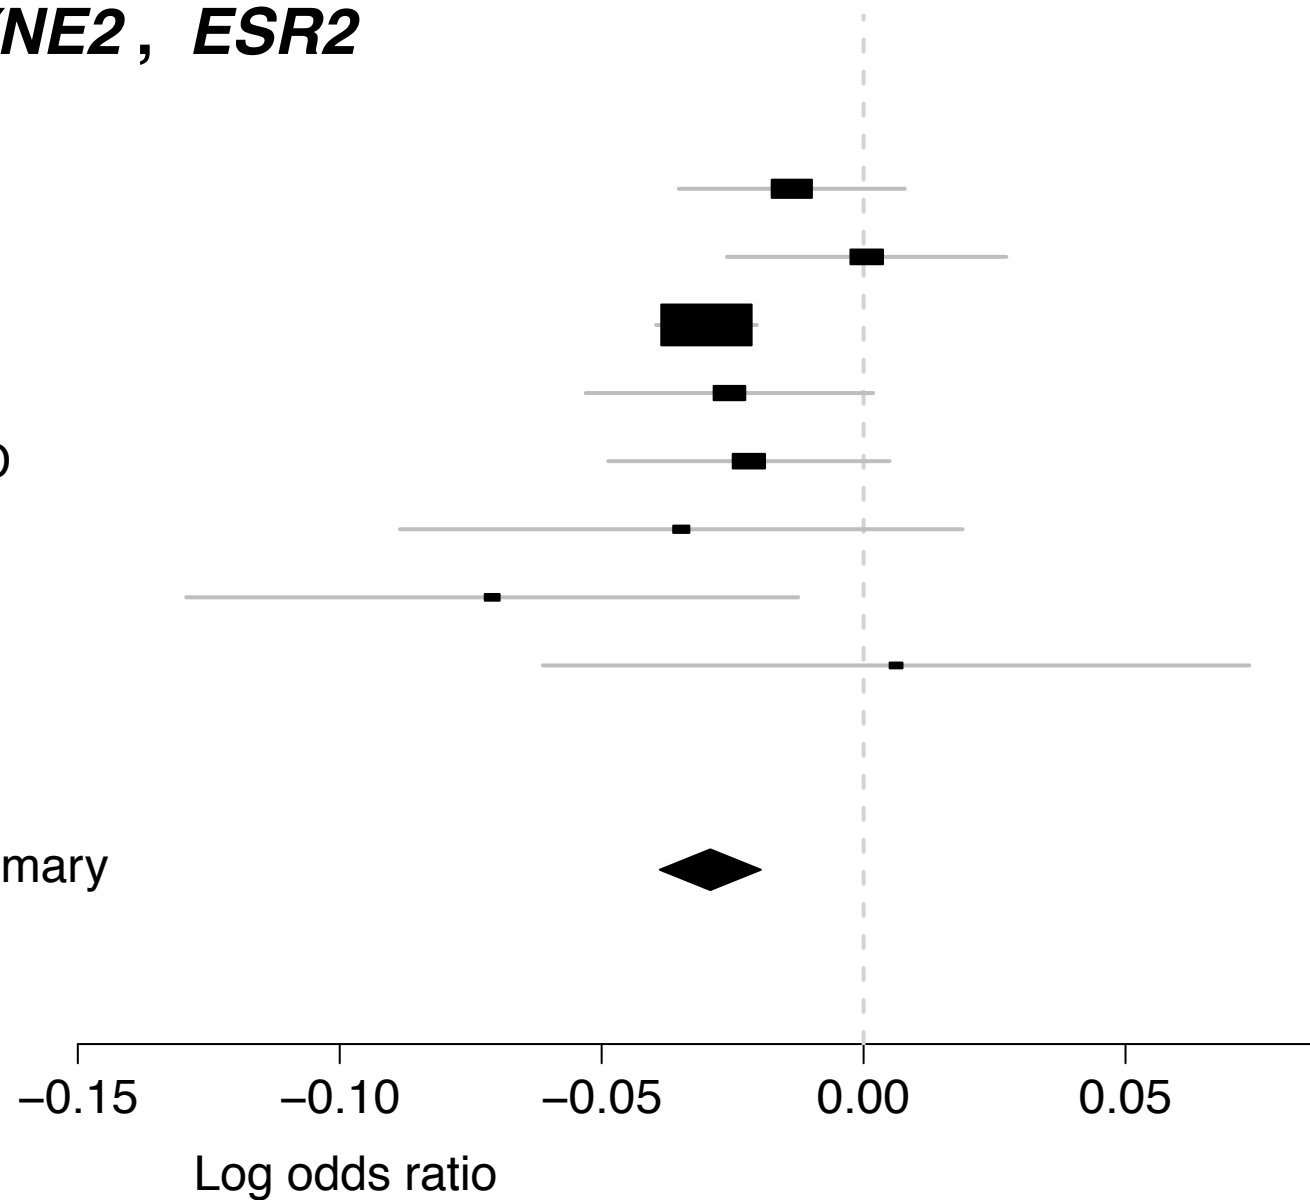

PM-Plot

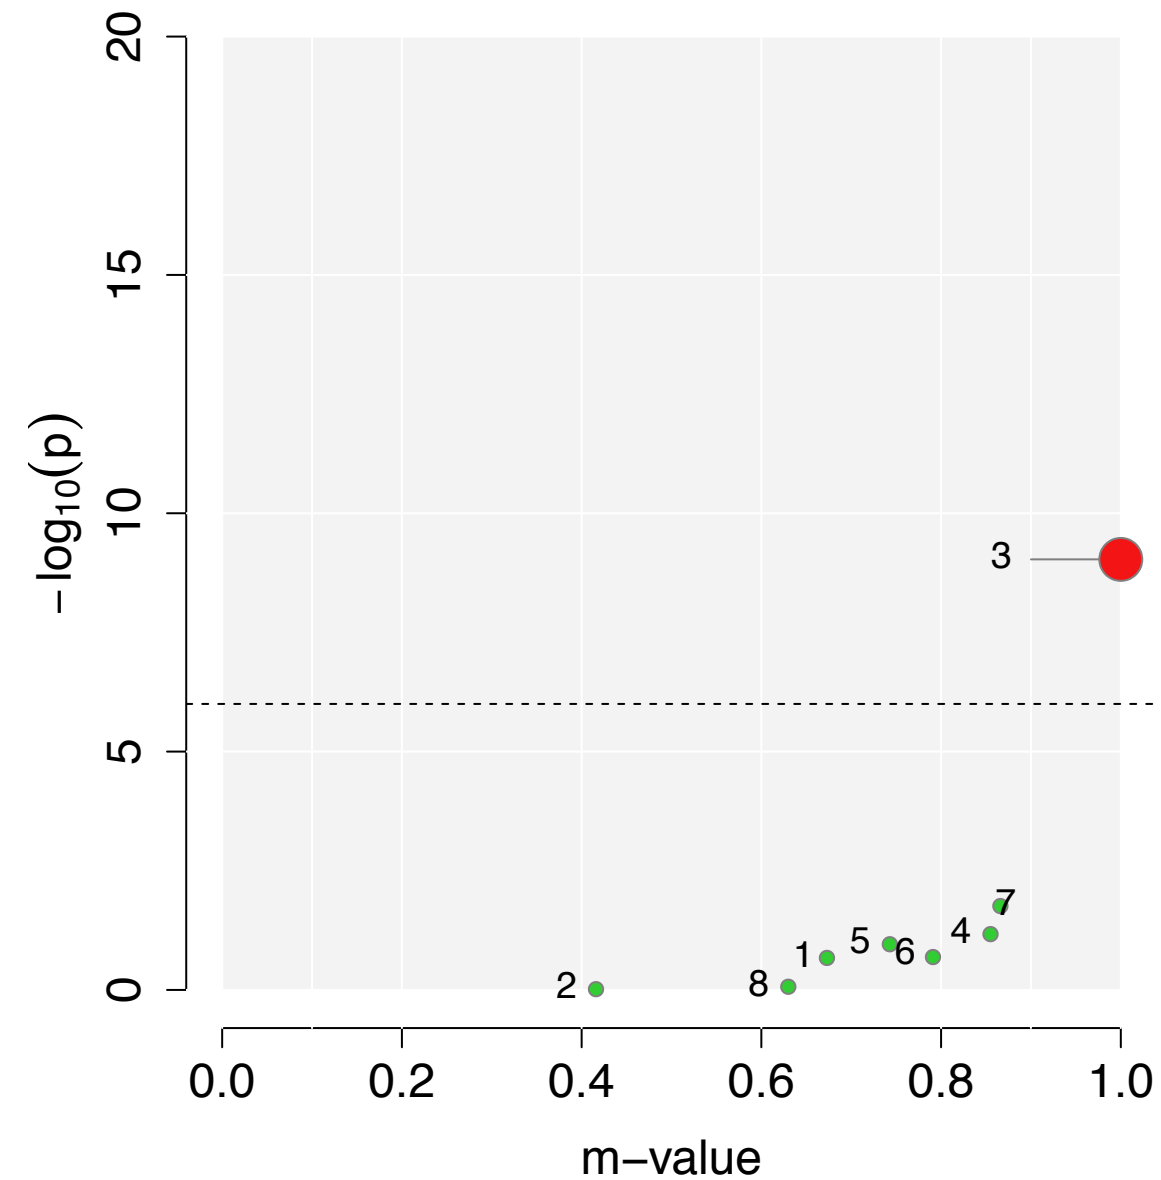



# rs1002656 (Meta $P = 1.15 \times 10^{-8}$ )

Gene : *GRIK3*

## GWAS P-value

- 0.0057 ● 1.SCZ
- 0.0139 ● 2.BIP
- $5.83 \times 10^{-8}$  ● 3.MD
- 0.1378 ● 4.ASD
- 0.6600 ● 5.ADHD
- 0.3156 ● 6.TS
- 0.6629 ● 7.ANO
- 0.1869 ● 8.OCD

FE summary

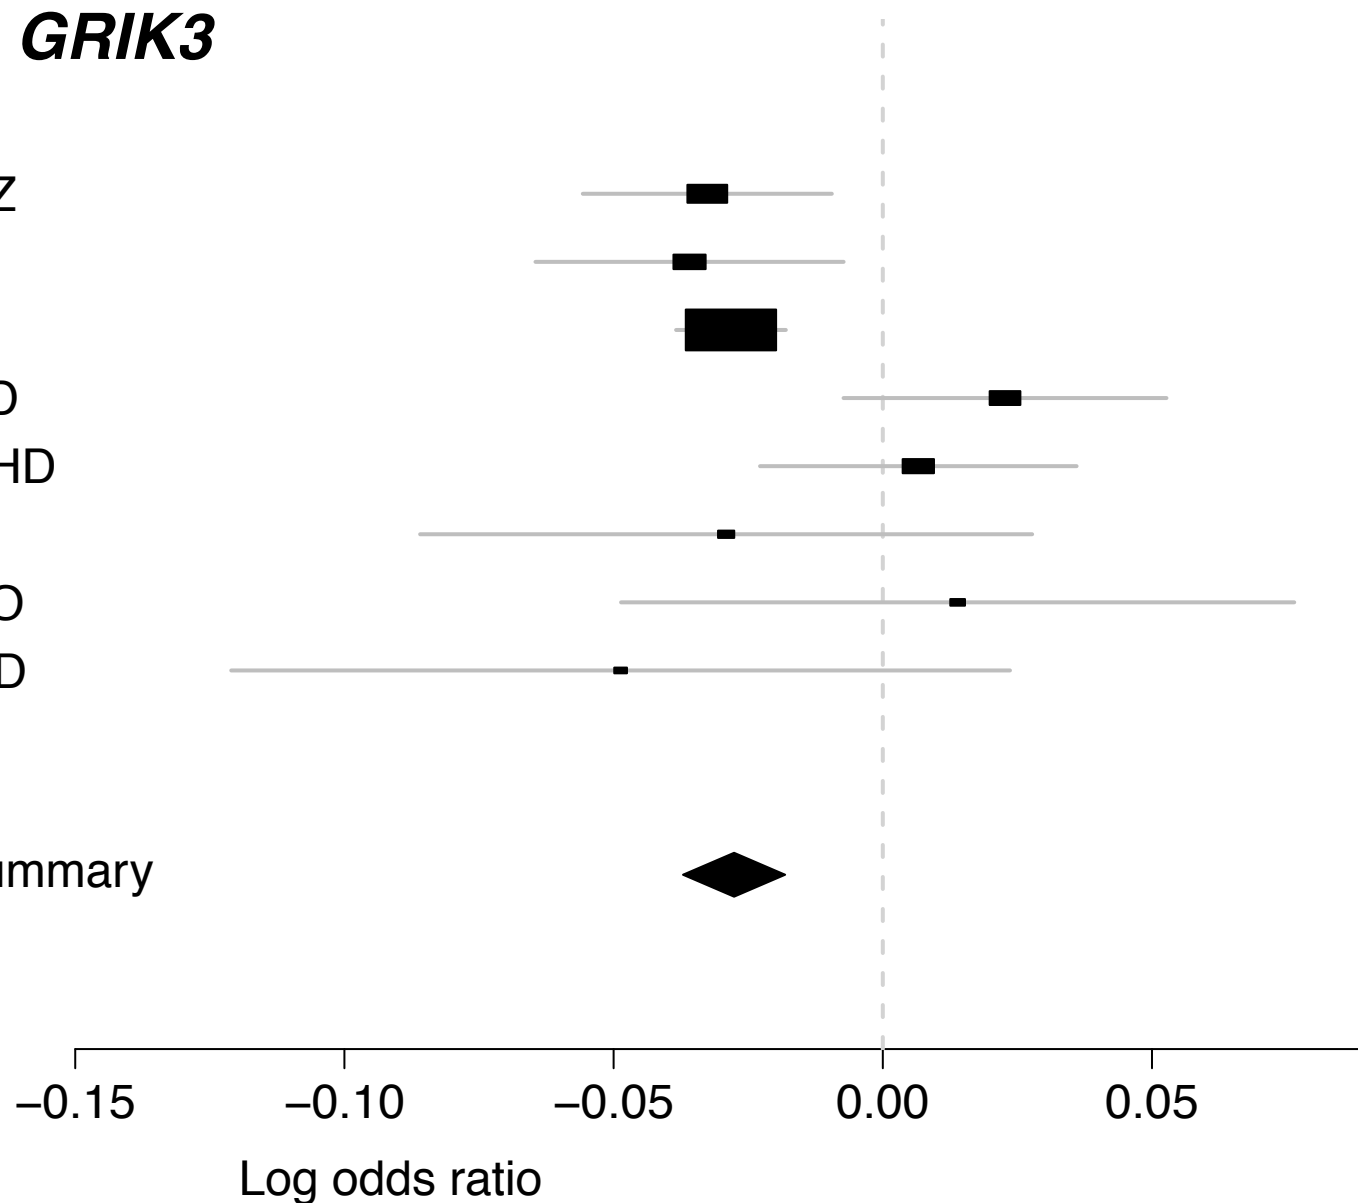

## PM-Plot

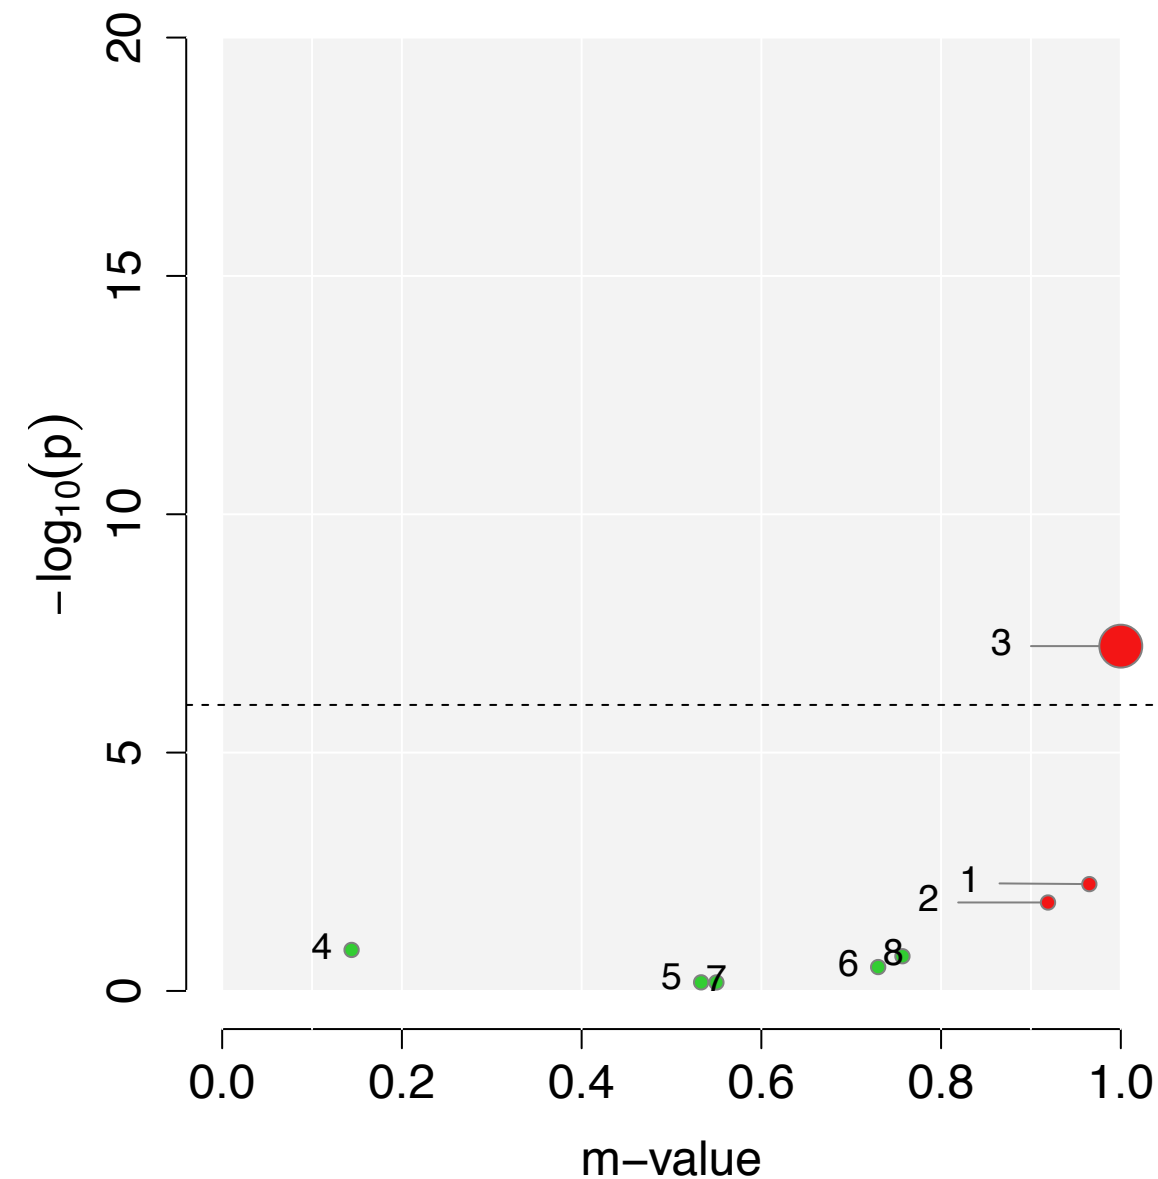

# rs1226412 (Meta $P = 2.07 \times 10^{-8}$ )

Gene : *NR4A2*

## GWAS P-value

- 0.2232 ● 1.SCZ
- 0.1415 ● 2.BIP
- $1.82 \times 10^{-8}$  ● 3.MD
- 0.4833 ● 4.ASD
- 0.2740 ● 5.ADHD
- 0.0126 ● 6.TS
- 0.1174 ● 7.ANO
- 0.0434 ● 8.OCD

FE summary

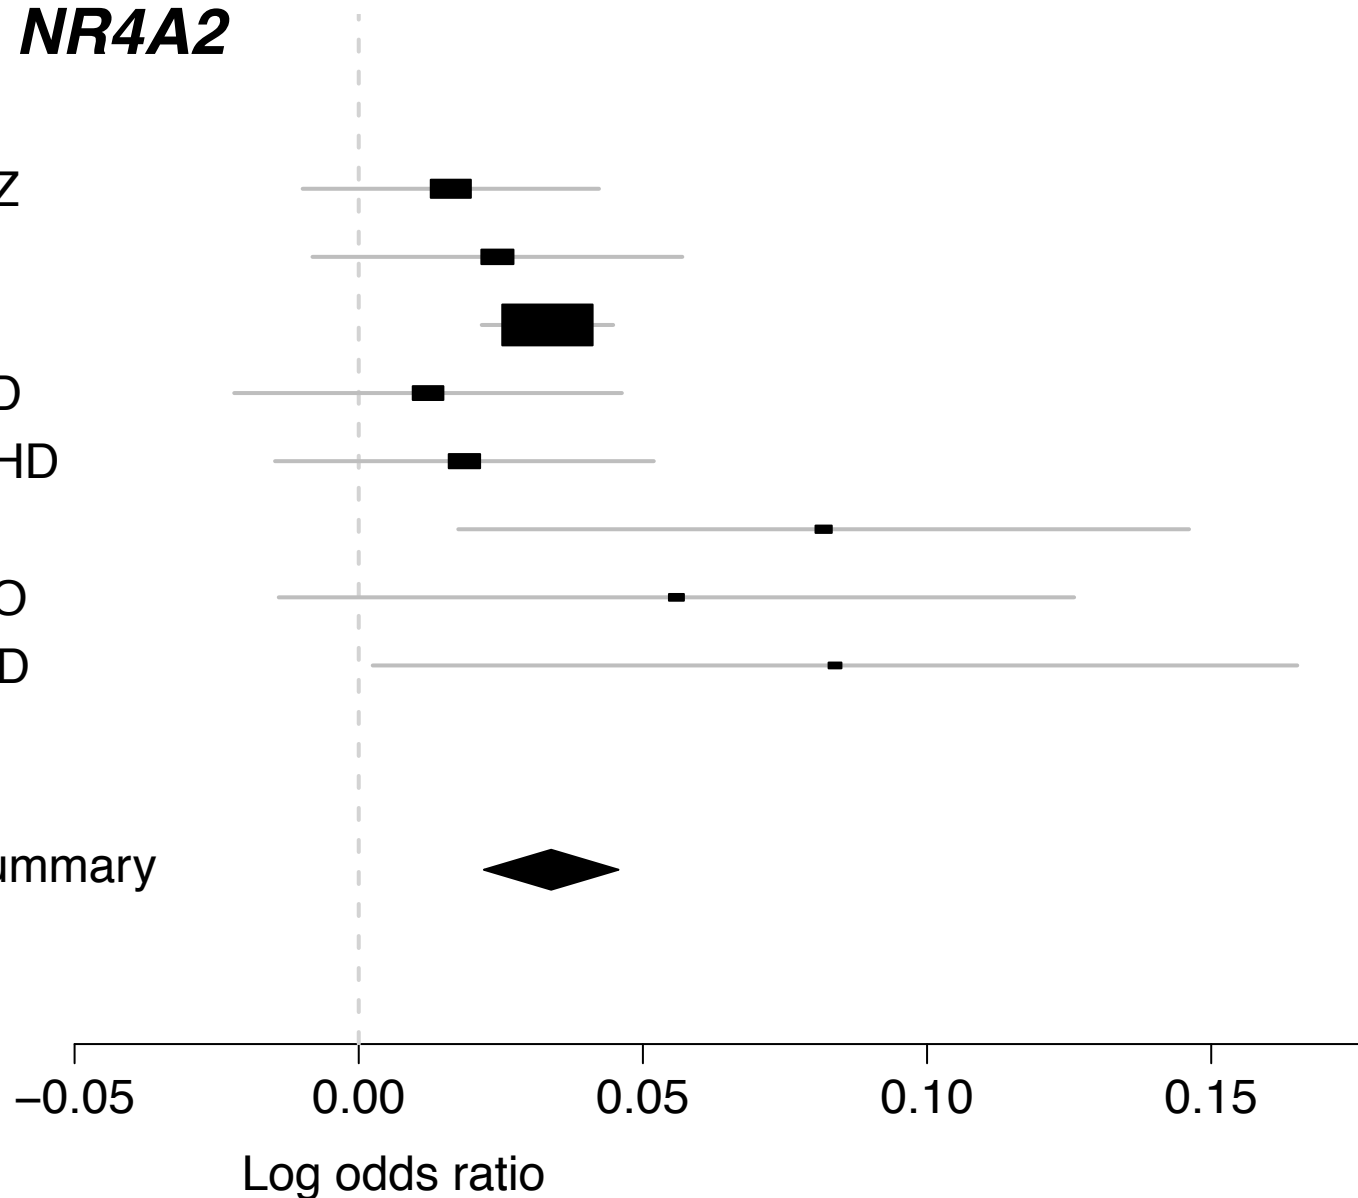

## PM-Plot

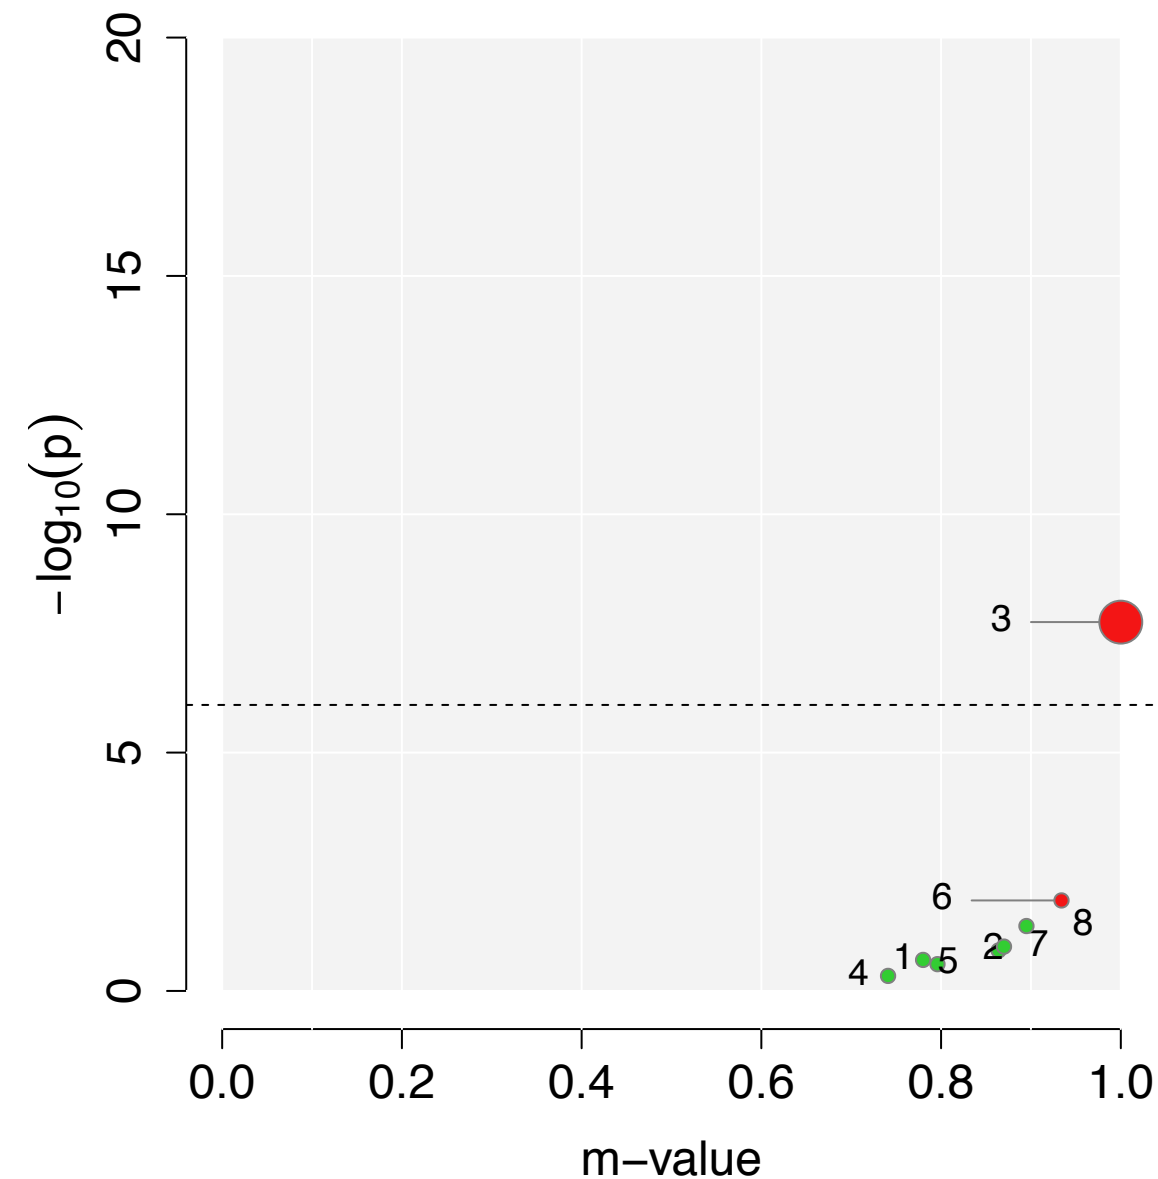

# rs1484144 (Meta $P = 4.24 \times 10^{-9}$ )

Gene : *NAA11*

## GWAS P-value

- 0.0002 ● 1.SCZ
- 0.0073 ● 2.BIP
- $3.06 \times 10^{-6}$  ● 3.MD
- 0.0141 ● 4.ASD
- $2.05 \times 10^{-6}$  ● 5.ADHD
- 0.6078 ● 6.TS
- 0.3156 ● 7.ANO
- 0.7845 ● 8.OCD

FE summary

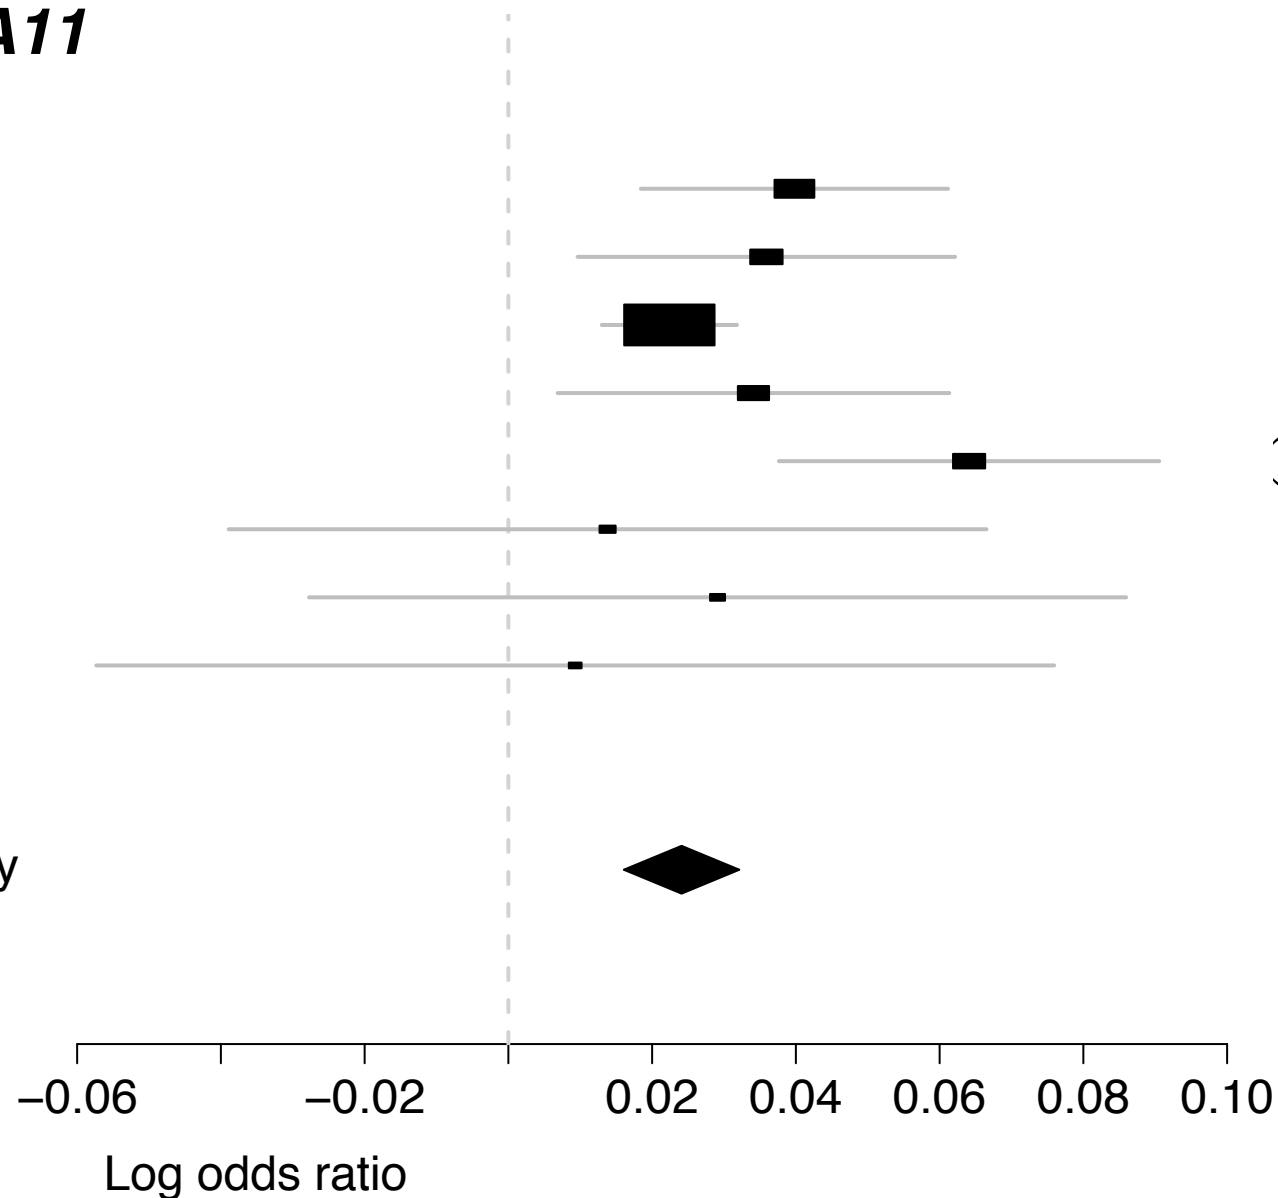

## PM-Plot

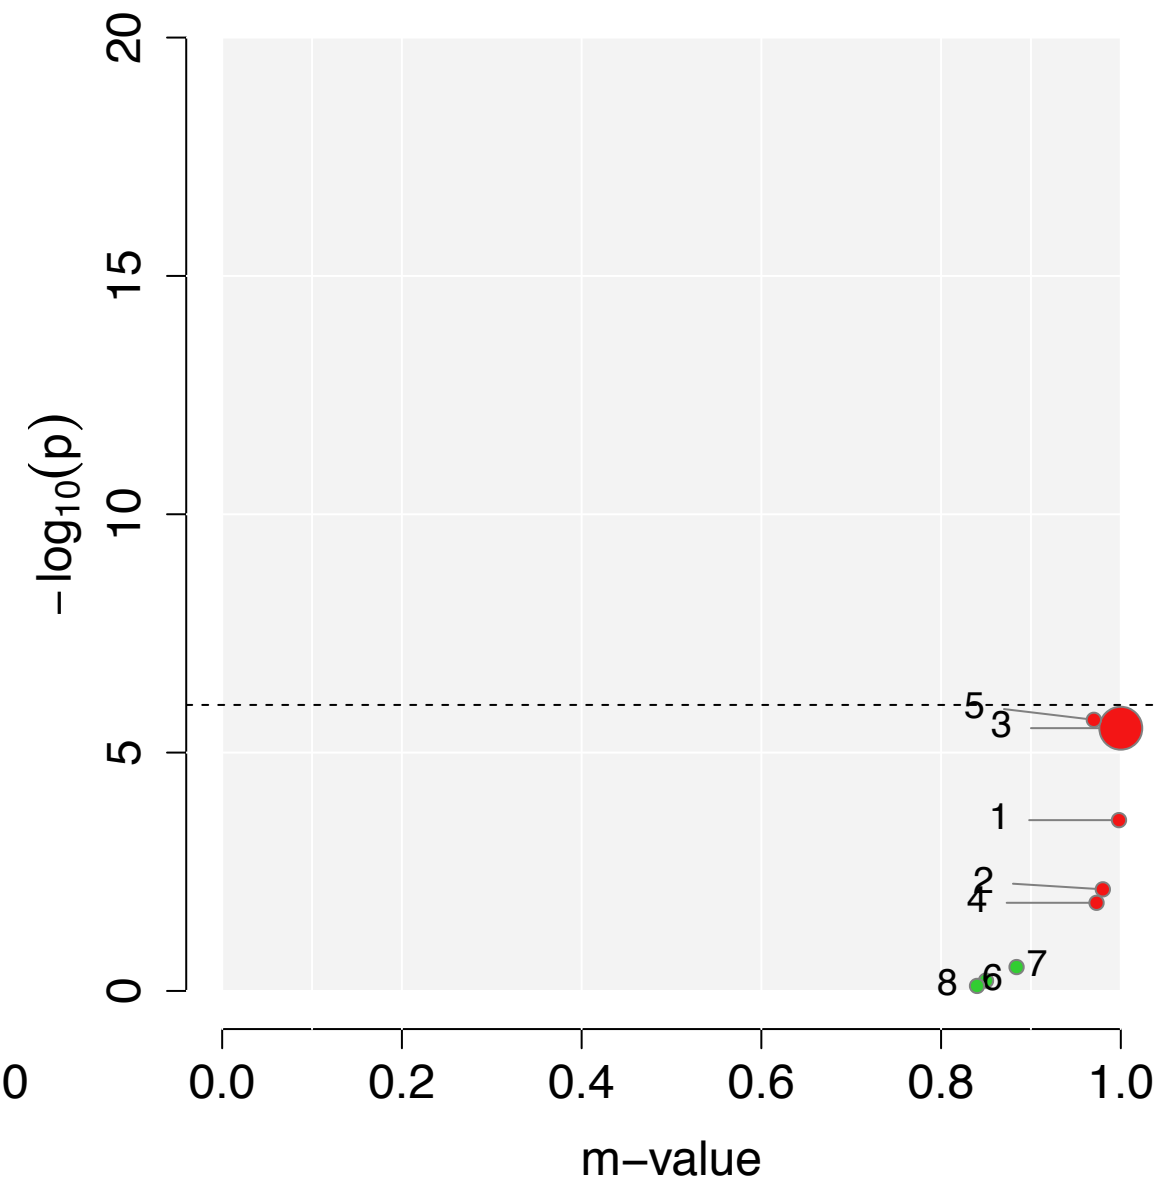

# rs1501361 (Meta $P = 3.97 \times 10^{-8}$ )

Gene : *HCN1*

## GWAS P-value

- 1.15 x 10<sup>-6</sup> ● 1.SCZ
- 0.0001 ● 2.BIP
- 0.7425 ● 3.MD
- 0.9779 ● 4.ASD
- 0.5544 ● 5.ADHD
- 0.0026 ● 6.TS
- 0.7634 ● 7.ANO
- 0.6619 ● 8.OCD

FE summary

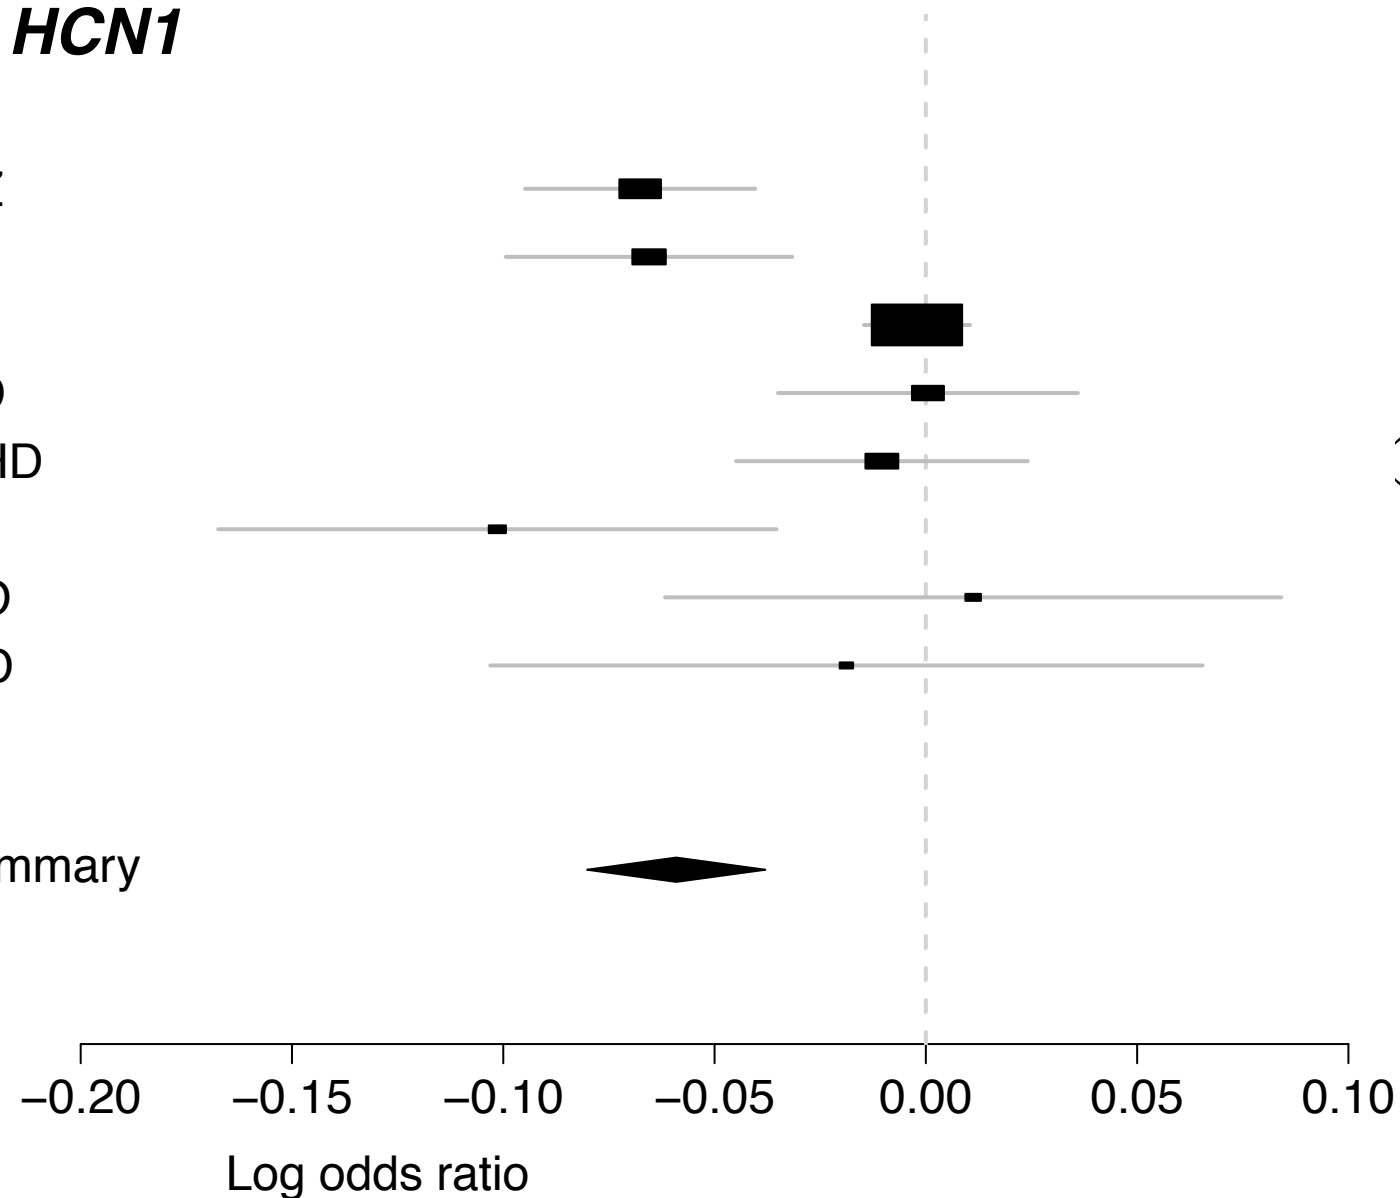

## PM-Plot

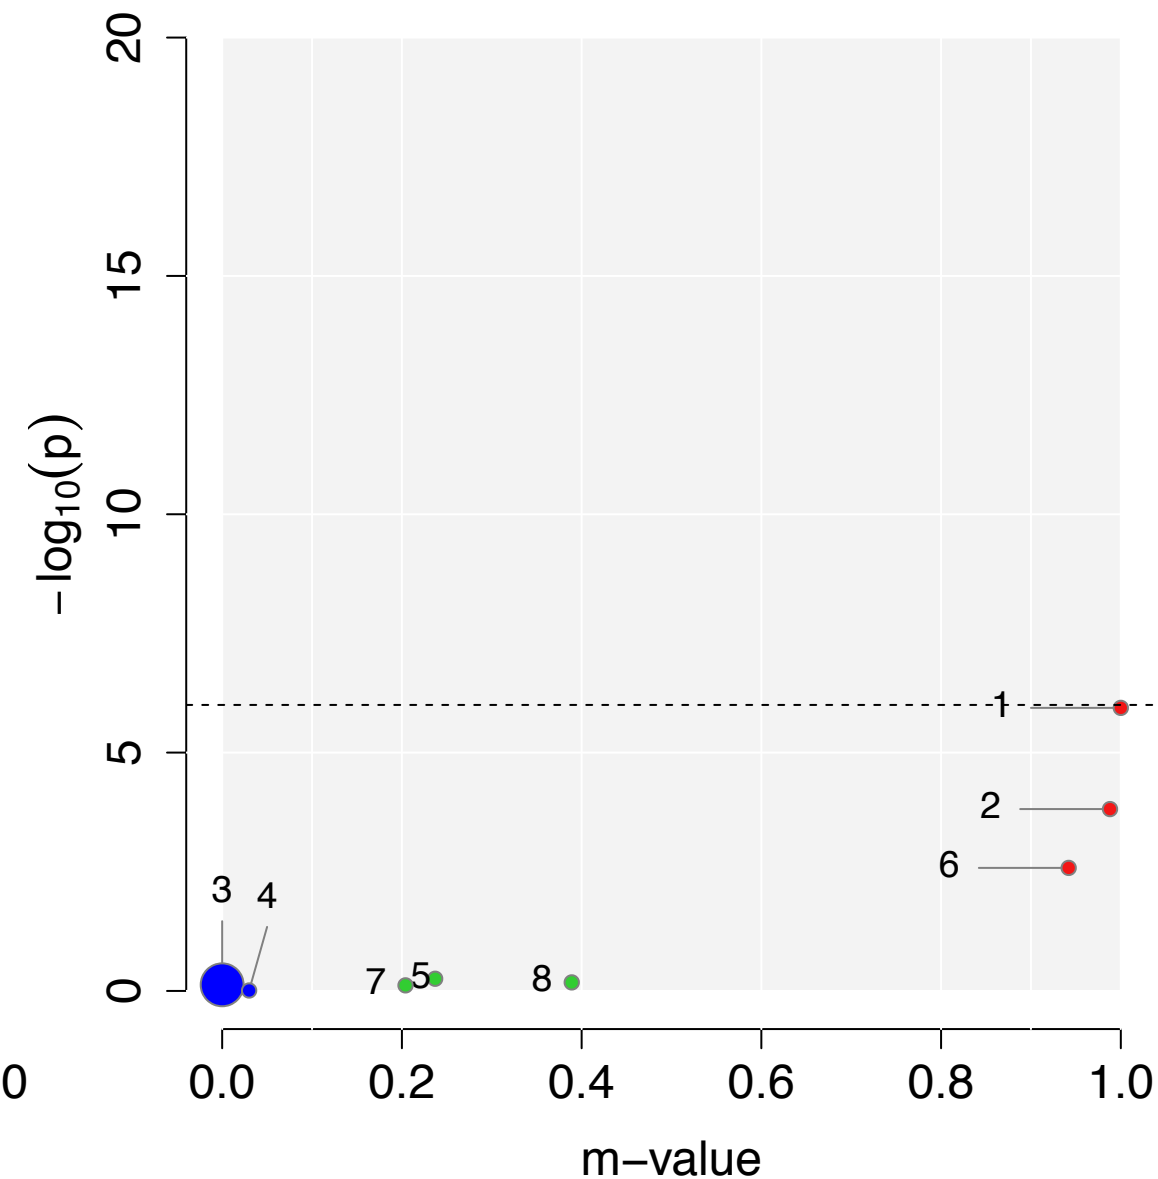

# rs1518367 (Meta $P = 1.06 \times 10^{-11}$ )

Gene : *PLCL1*

## GWAS P-value

- 2.82 x 10<sup>-8</sup> ● 1.SCZ
- 0.0008 ● 2.BIP
- 2.50 x 10<sup>-7</sup> ● 3.MD
- 0.0790 ● 4.ASD
- 0.0106 ● 5.ADHD
- 0.2833 ● 6.TS
- 0.8309 ● 7.ANO
- 0.3786 ● 8.OCD

FE summary

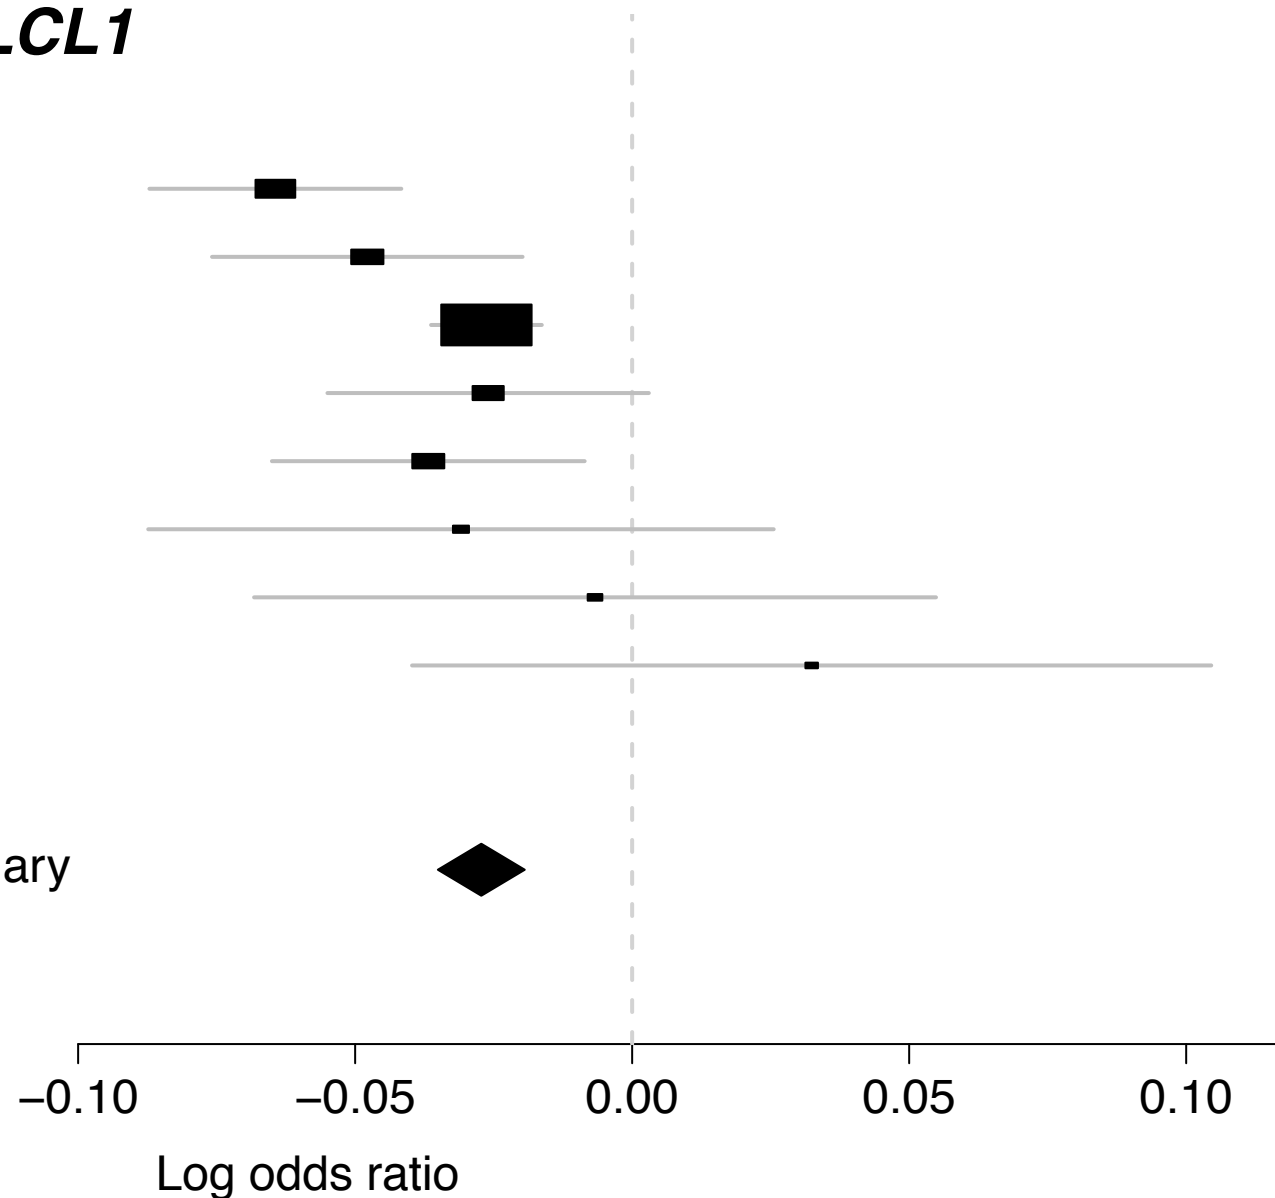

## PM-Plot

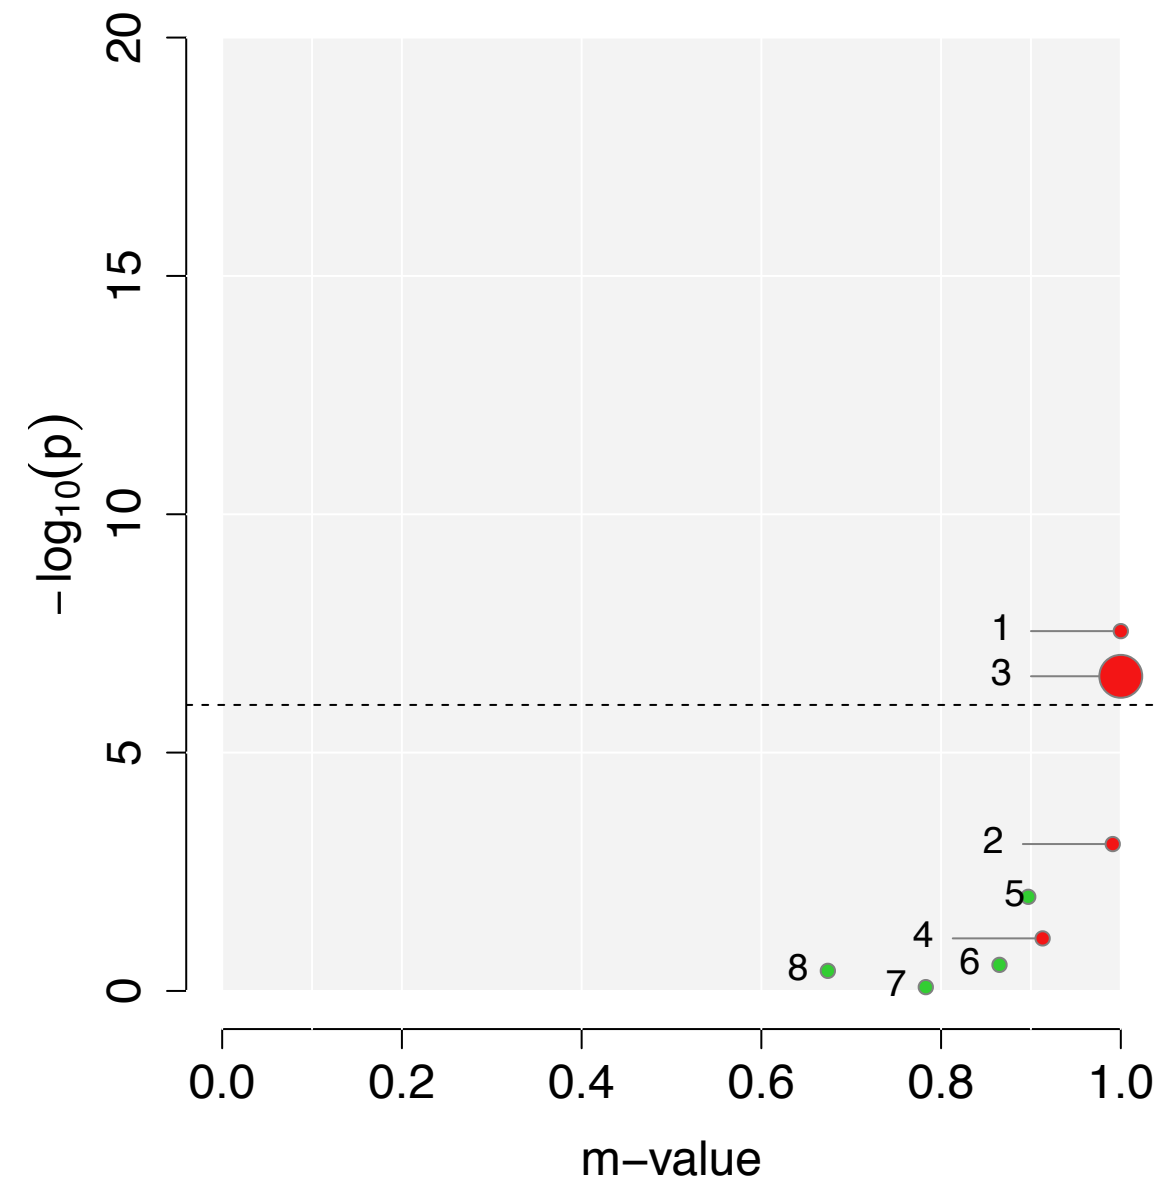

# rs1615350 (Meta $P = 5.06 \times 10^{-10}$ )

Gene : *MPHOSPH9*, *PITPNM2*

## GWAS P-value

- 4.55 x 10<sup>-12</sup> ● 1.SCZ
- 0.0539 ● 2.BIP
- 0.3255 ● 3.MD
- 0.7324 ● 4.ASD
- 0.0351 ● 5.ADHD
- 0.0003 ● 6.TS
- 0.3616 ● 7.ANO
- 0.6142 ● 8.OCD

FE summary

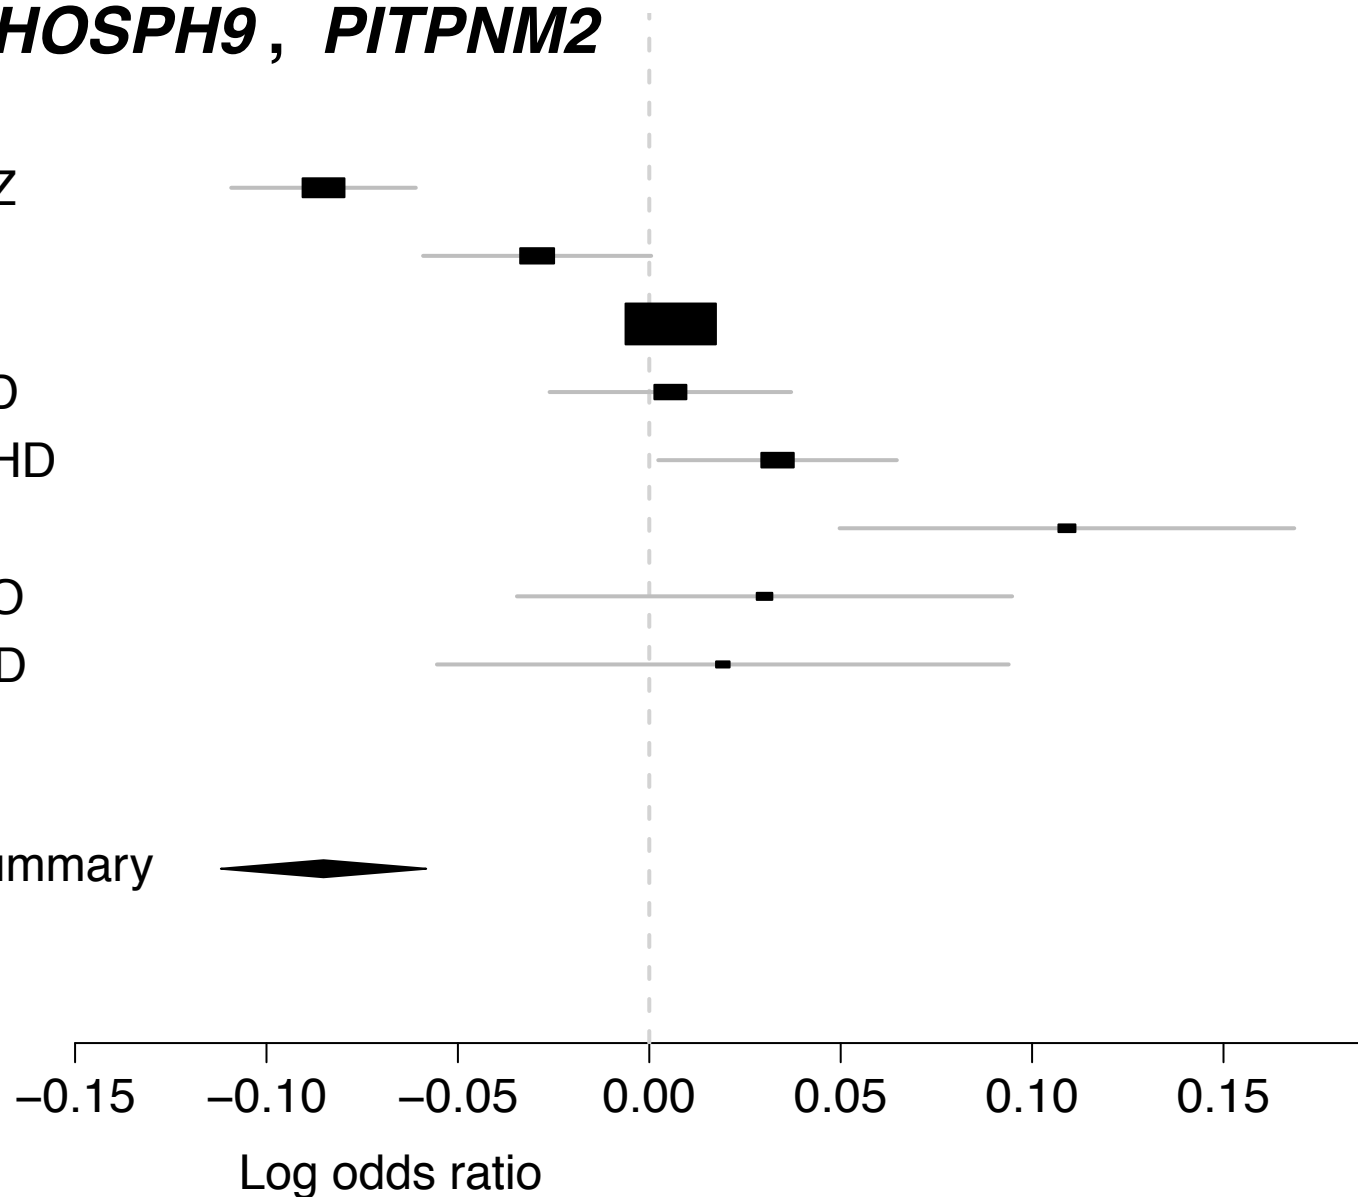

## PM-Plot

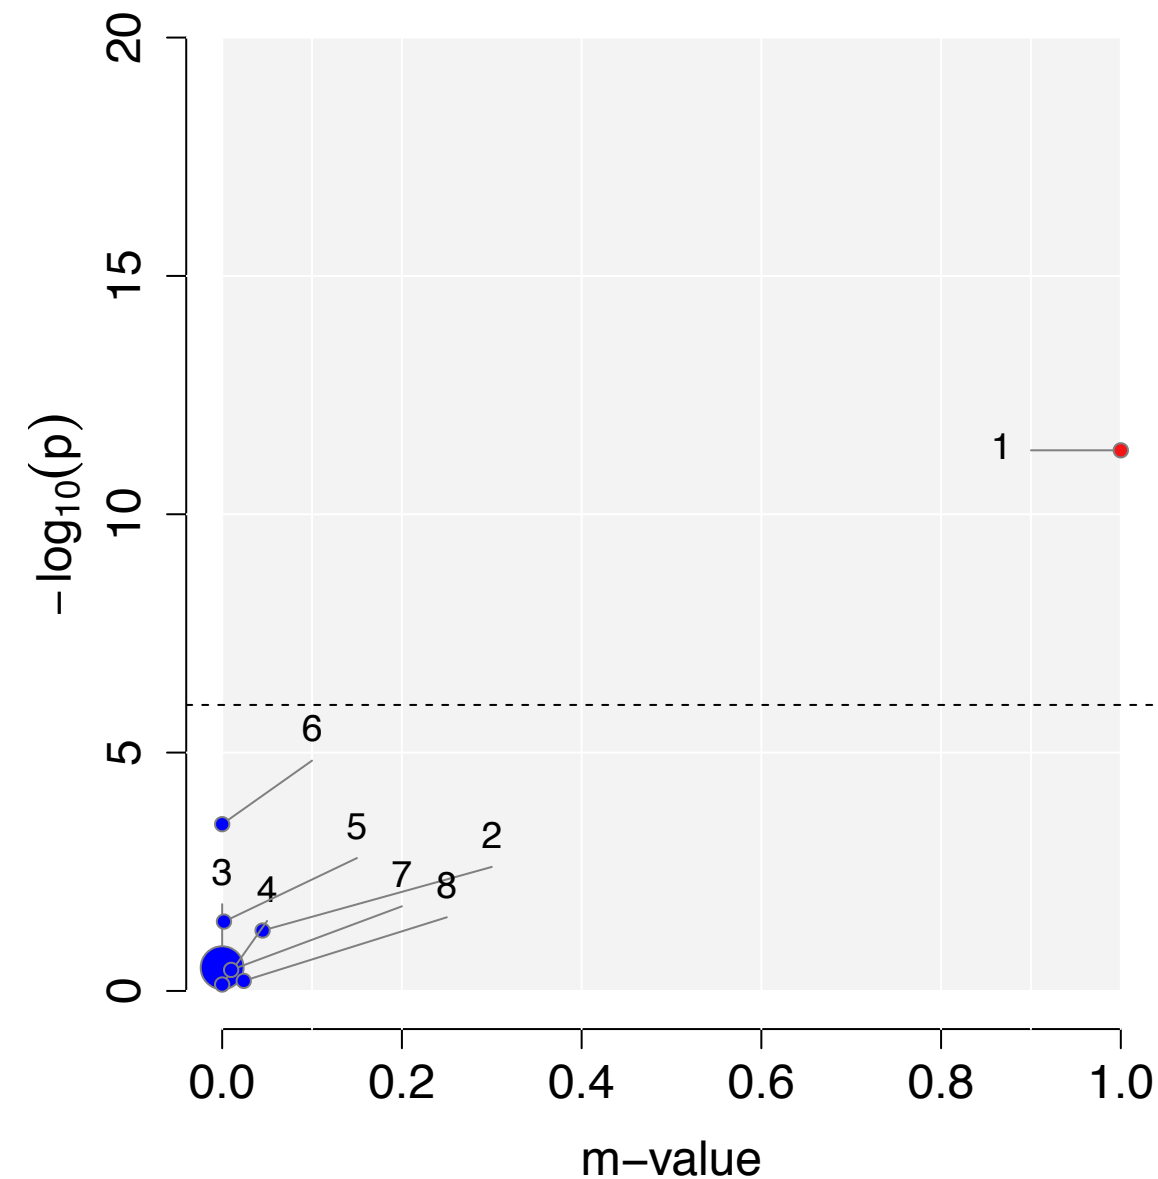



# rs1702294 (Meta $P = 3.03 \times 10^{-16}$ )

Gene : (>200kb)

## GWAS P-value

$9.50 \times 10^{-18}$  ●

1.SCZ

0.3625 ●

2.BIP

0.9485 ●

3.MD

0.0364 ●

4.ASD

0.1618 ●

5.ADHD

0.7775 ●

6.TS

0.4654 ●

7.ANO

0.0440 ●

8.OCD

FE summary

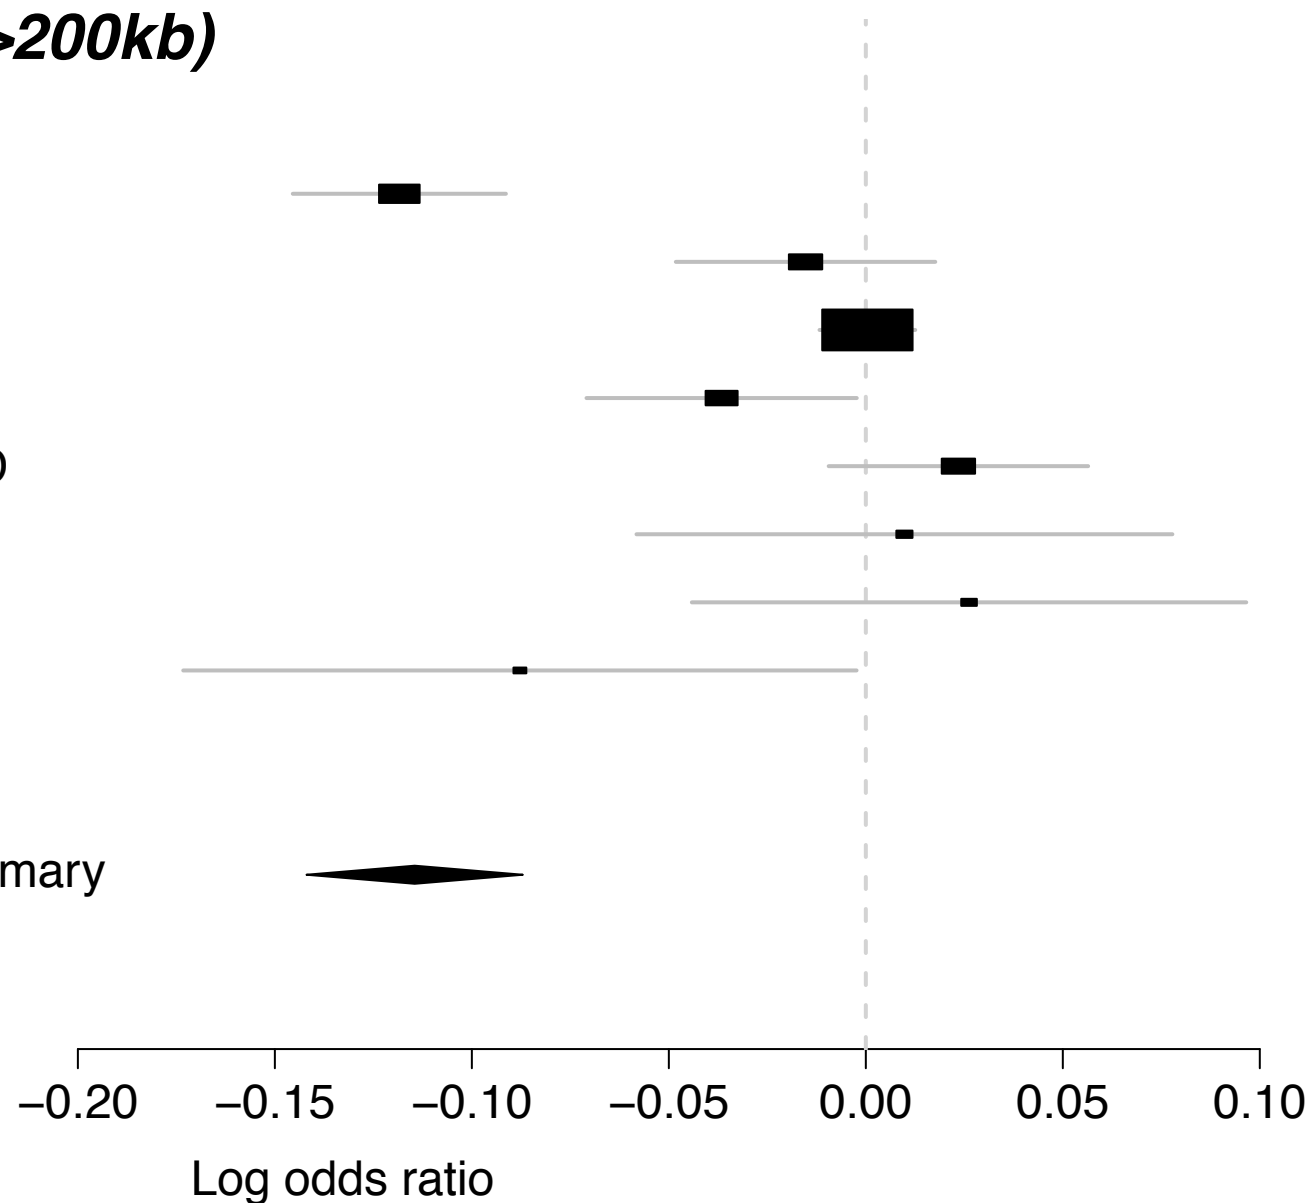

## PM-Plot

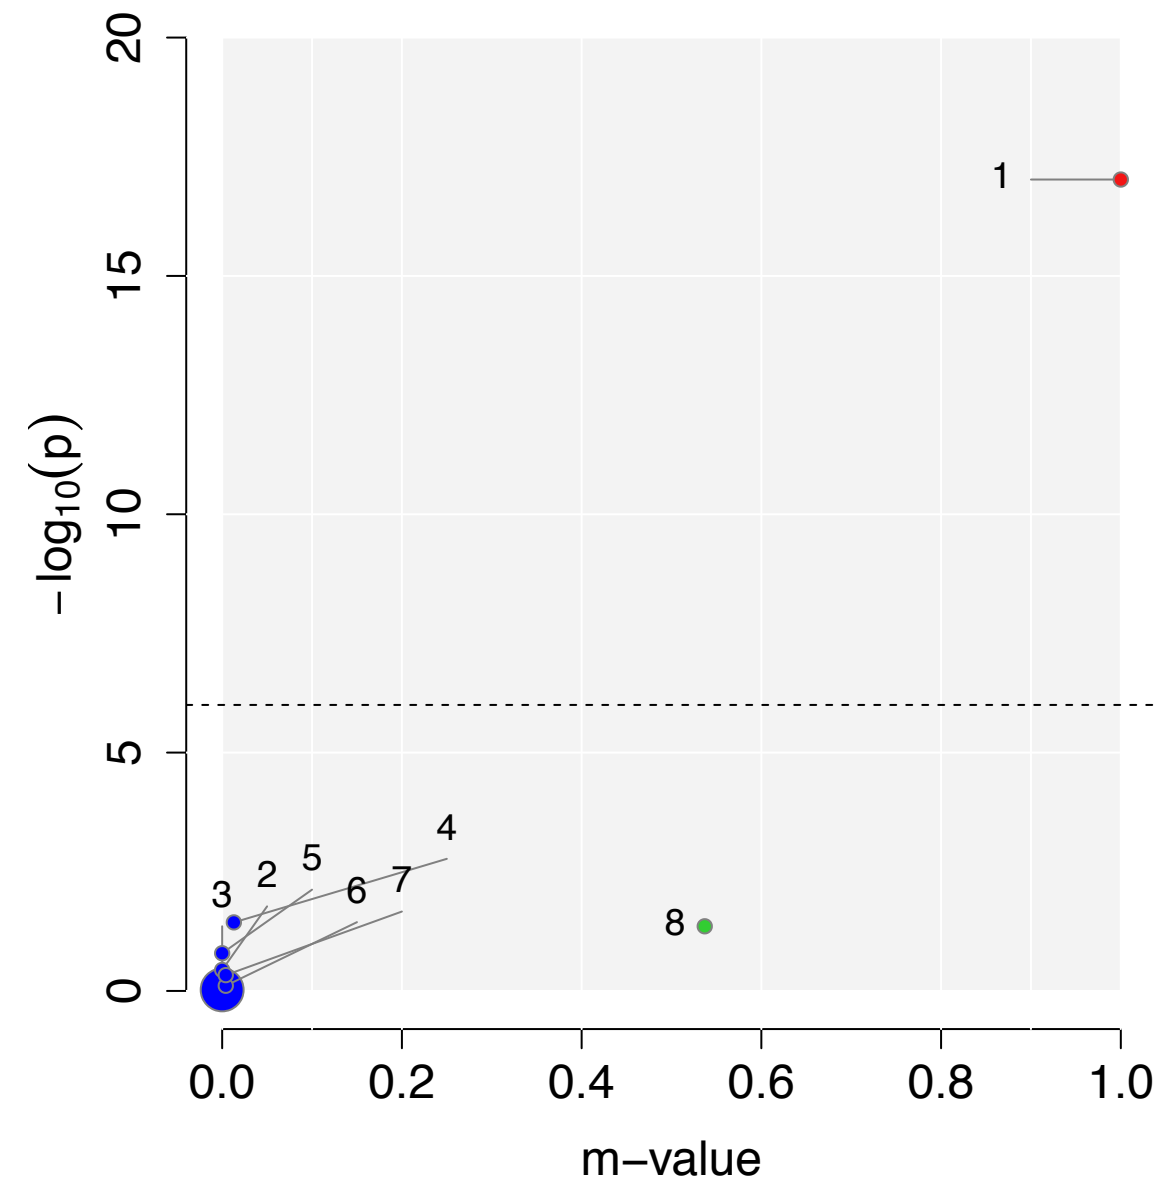

# rs1730054 (Meta $P = 5.81 \times 10^{-10}$ )

Gene : *RSRC1*

## GWAS P-value

- 0.8542 ● 1.SCZ
- 0.0288 ● 2.BIP
- $2.56 \times 10^{-8}$  ● 3.MD
- 0.0001 ● 4.ASD
- 0.0050 ● 5.ADHD
- 0.4081 ● 6.TS
- 0.1661 ● 7.ANO
- 0.0132 ● 8.OCD

FE summary

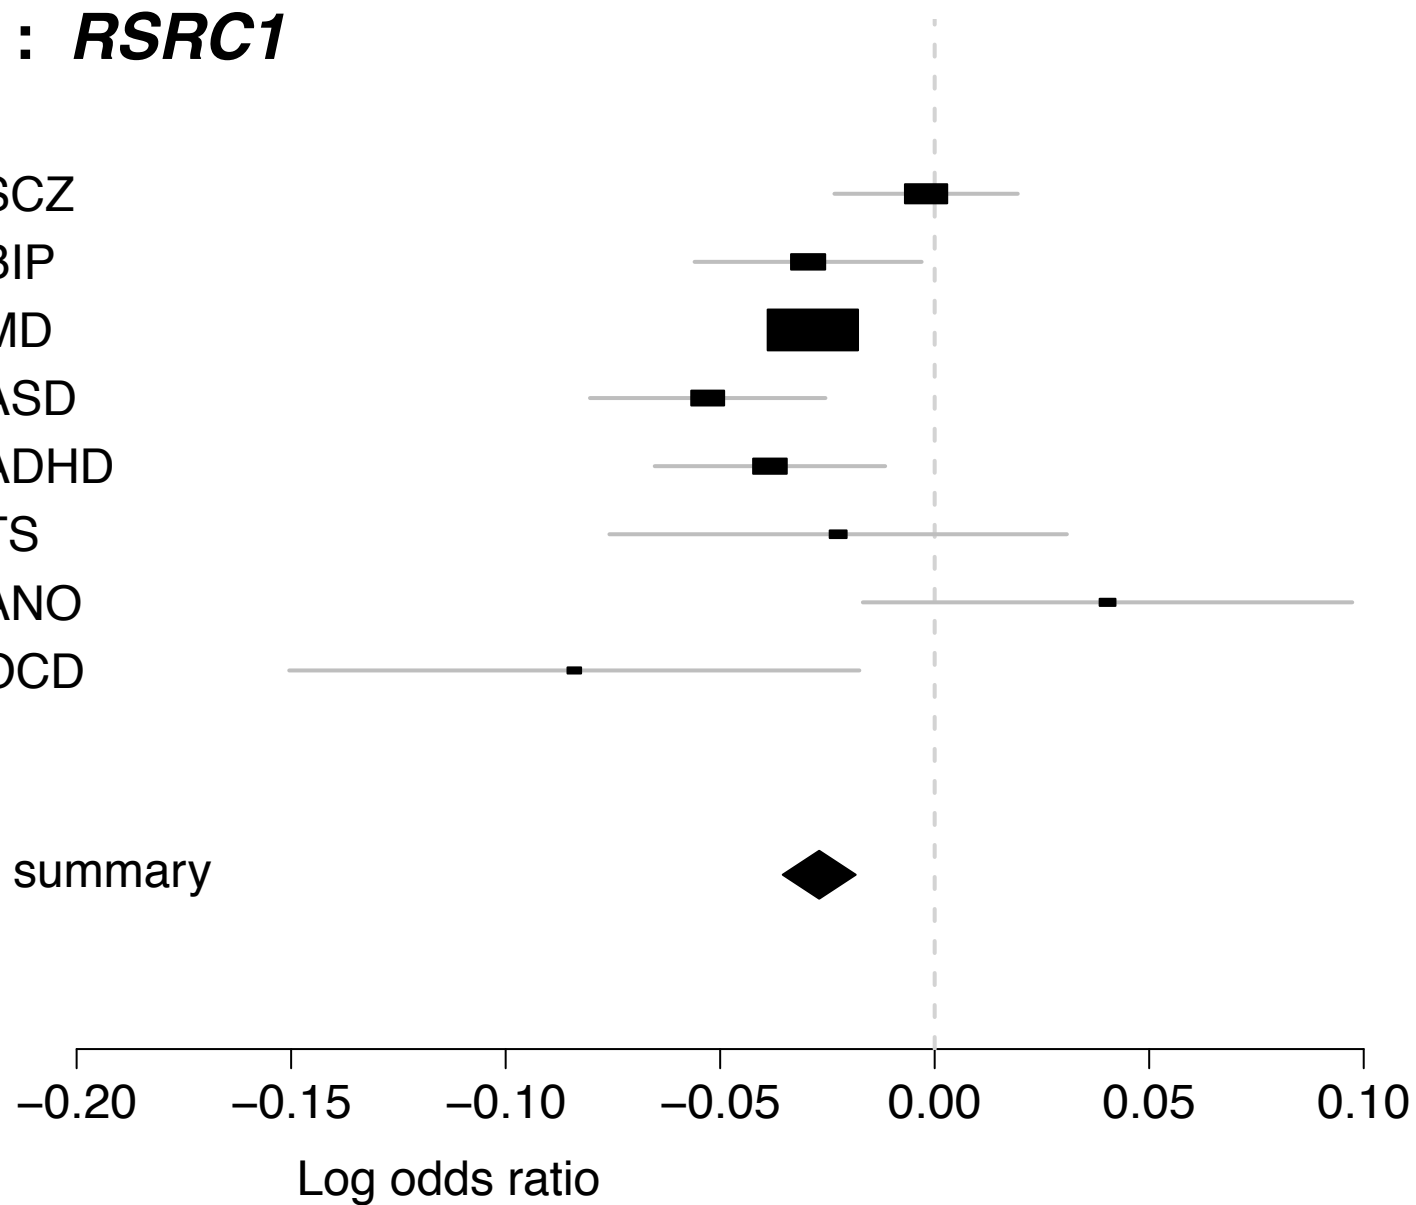

## PM-Plot

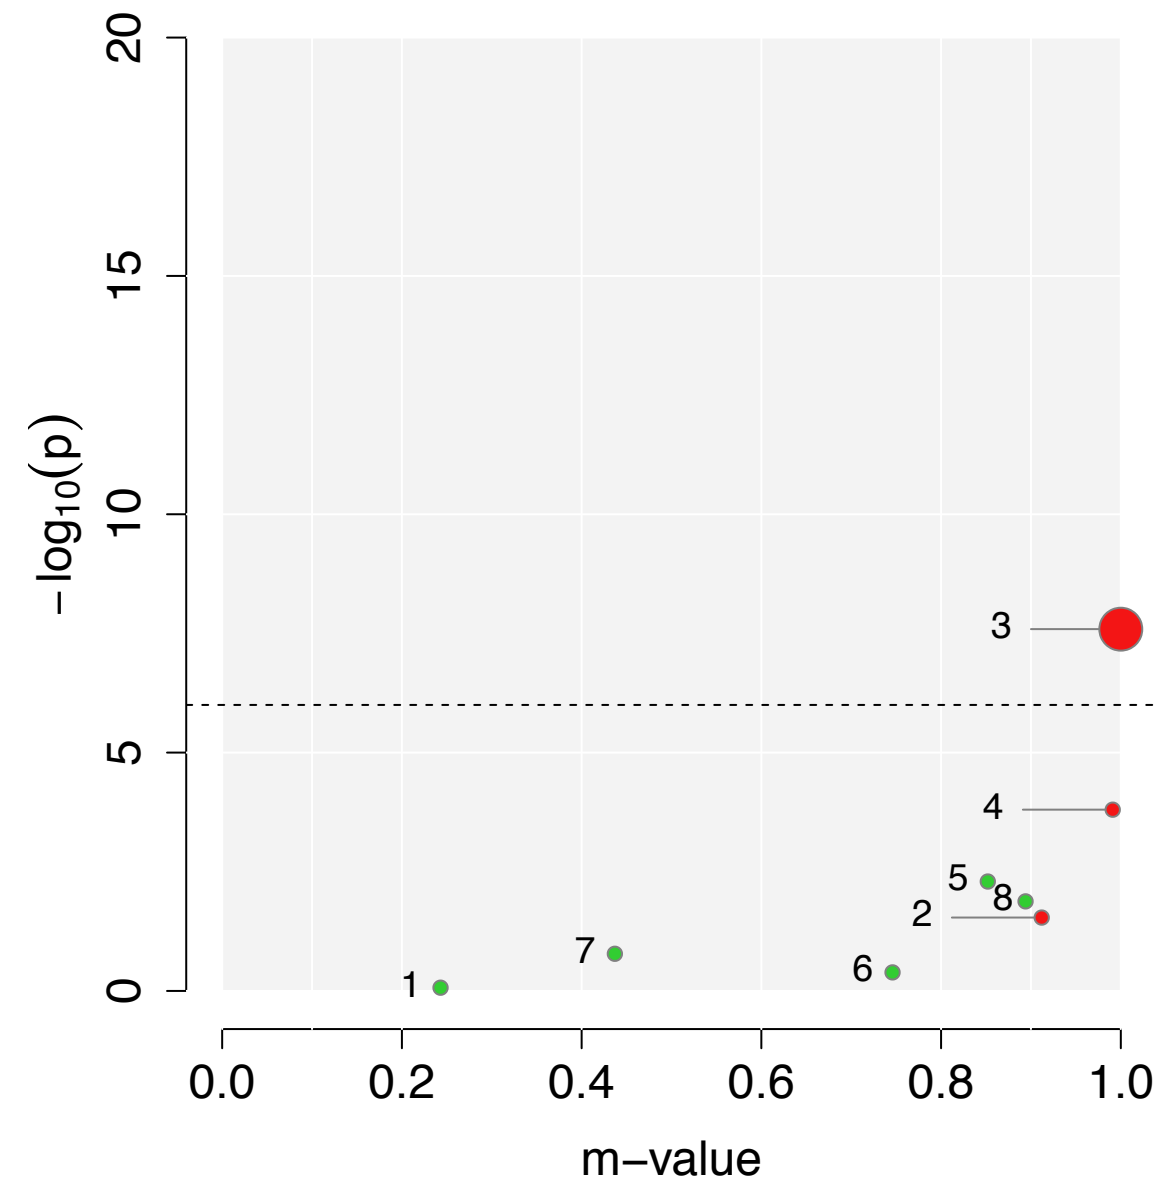

# rs1806153 (Meta $P = 1.1e \times 10^{-9}$ )

Gene : *PAX6*, *ELP4*

## GWAS P-value

- 0.2701 ● 1.SCZ
- 0.9572 ● 2.BIP
- $9.43 \times 10^{-10}$  ● 3.MD
- 0.0006 ● 4.ASD
- 0.2791 ● 5.ADHD
- 0.3045 ● 6.TS
- 0.4847 ● 7.ANO
- 0.2514 ● 8.OCD

FE summary

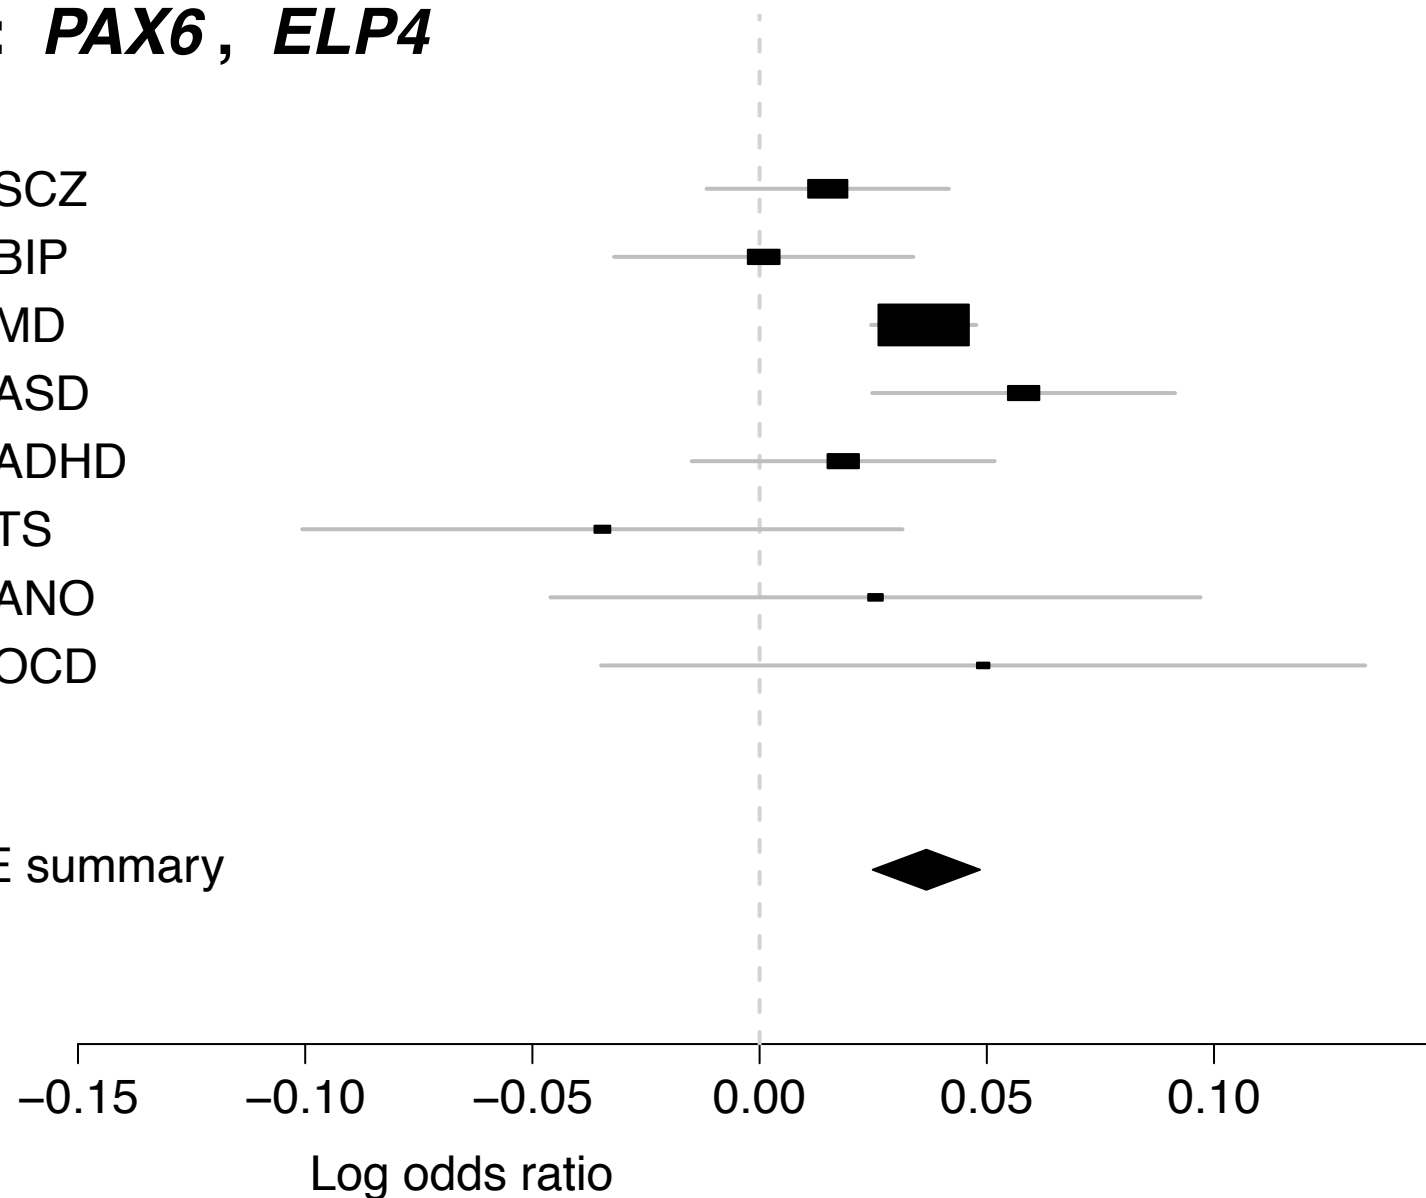

## PM-Plot

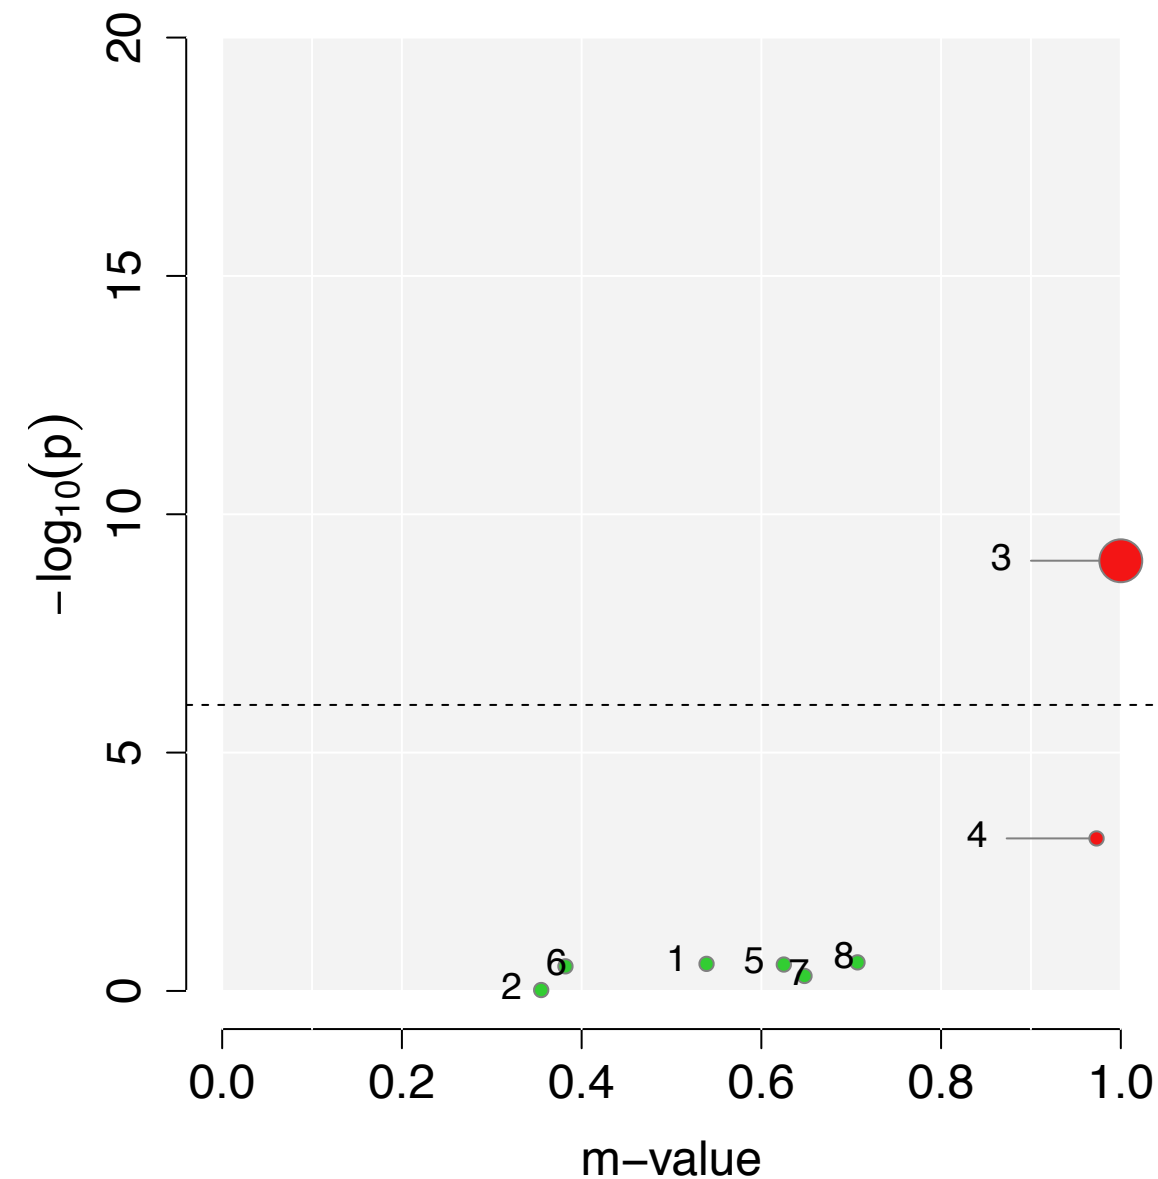

# rs1950829 (Meta $P = 2.27 \times 10^{-8}$ )

Gene : *LRFN5*

## GWAS P-value

- 0.3738 ● 1.SCZ
- 0.7806 ● 2.BIP
- $2.89 \times 10^{-9}$  ● 3.MD
- 0.2053 ● 4.ASD
- 0.3316 ● 5.ADHD
- 0.2093 ● 6.TS
- 0.0494 ● 7.ANO
- 0.3395 ● 8.OCD

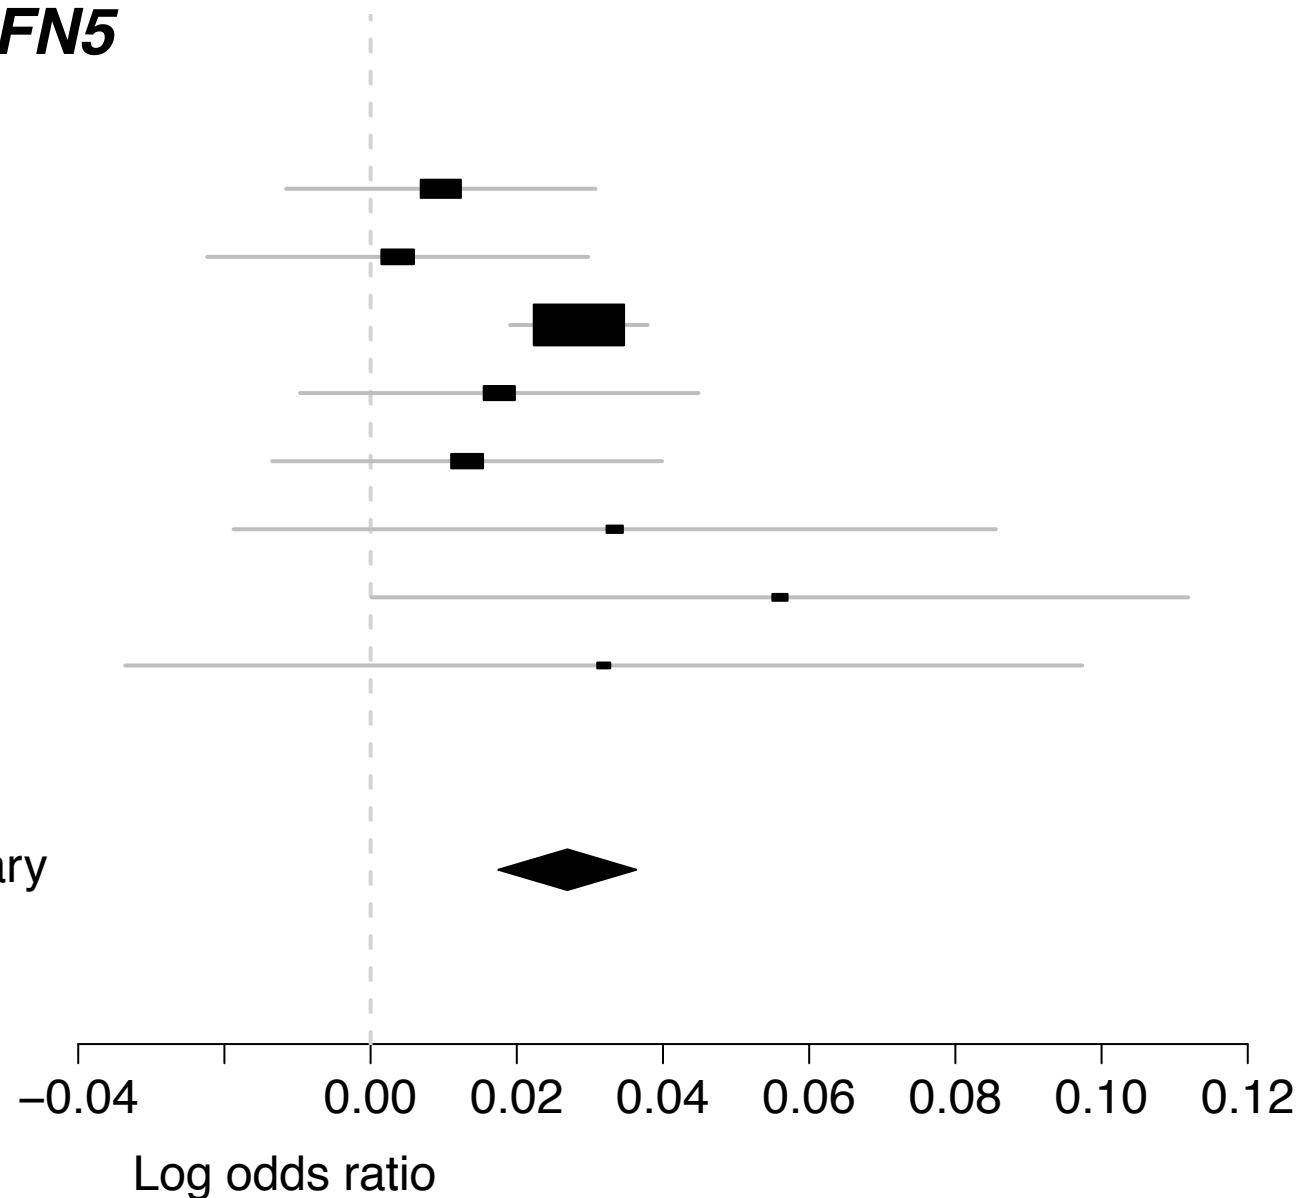

## PM-Plot

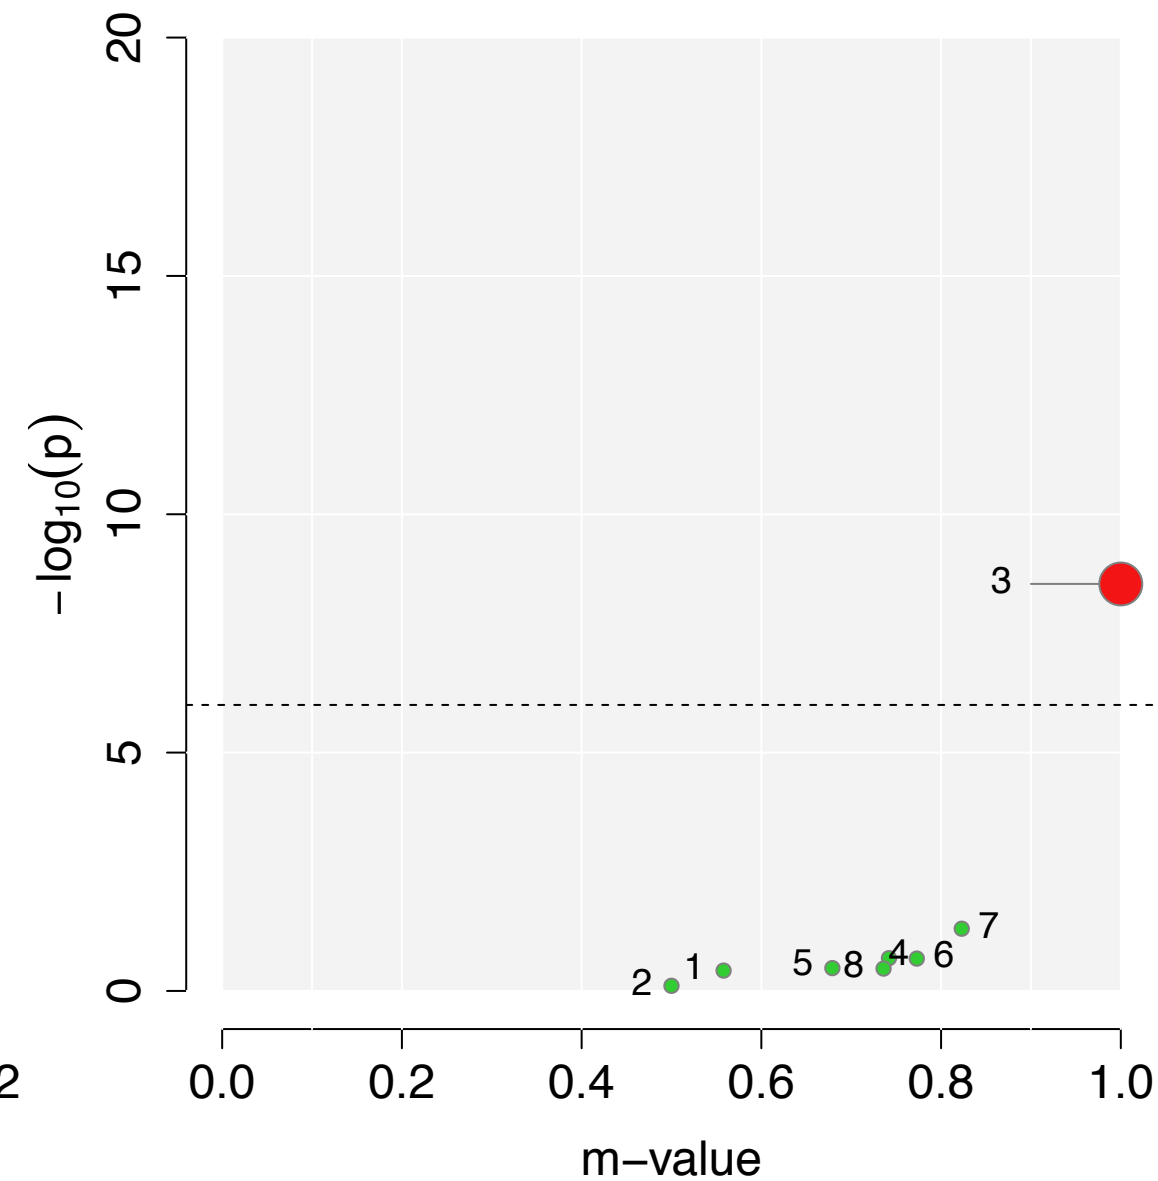

# rs2003490 (Meta $P = 1.56 \times 10^{-8}$ )

Gene : *RPS6KL1* , *DLST*

## GWAS P-value

- 0.0033 ● 1.SCZ
- 0.4137 ● 2.BIP
- $8.67 \times 10^{-9}$  ● 3.MD
- 0.8929 ● 4.ASD
- 0.2640 ● 5.ADHD
- 0.0661 ● 6.TS
- 0.9596 ● 7.ANO
- 0.4357 ● 8.OCD

FE summary

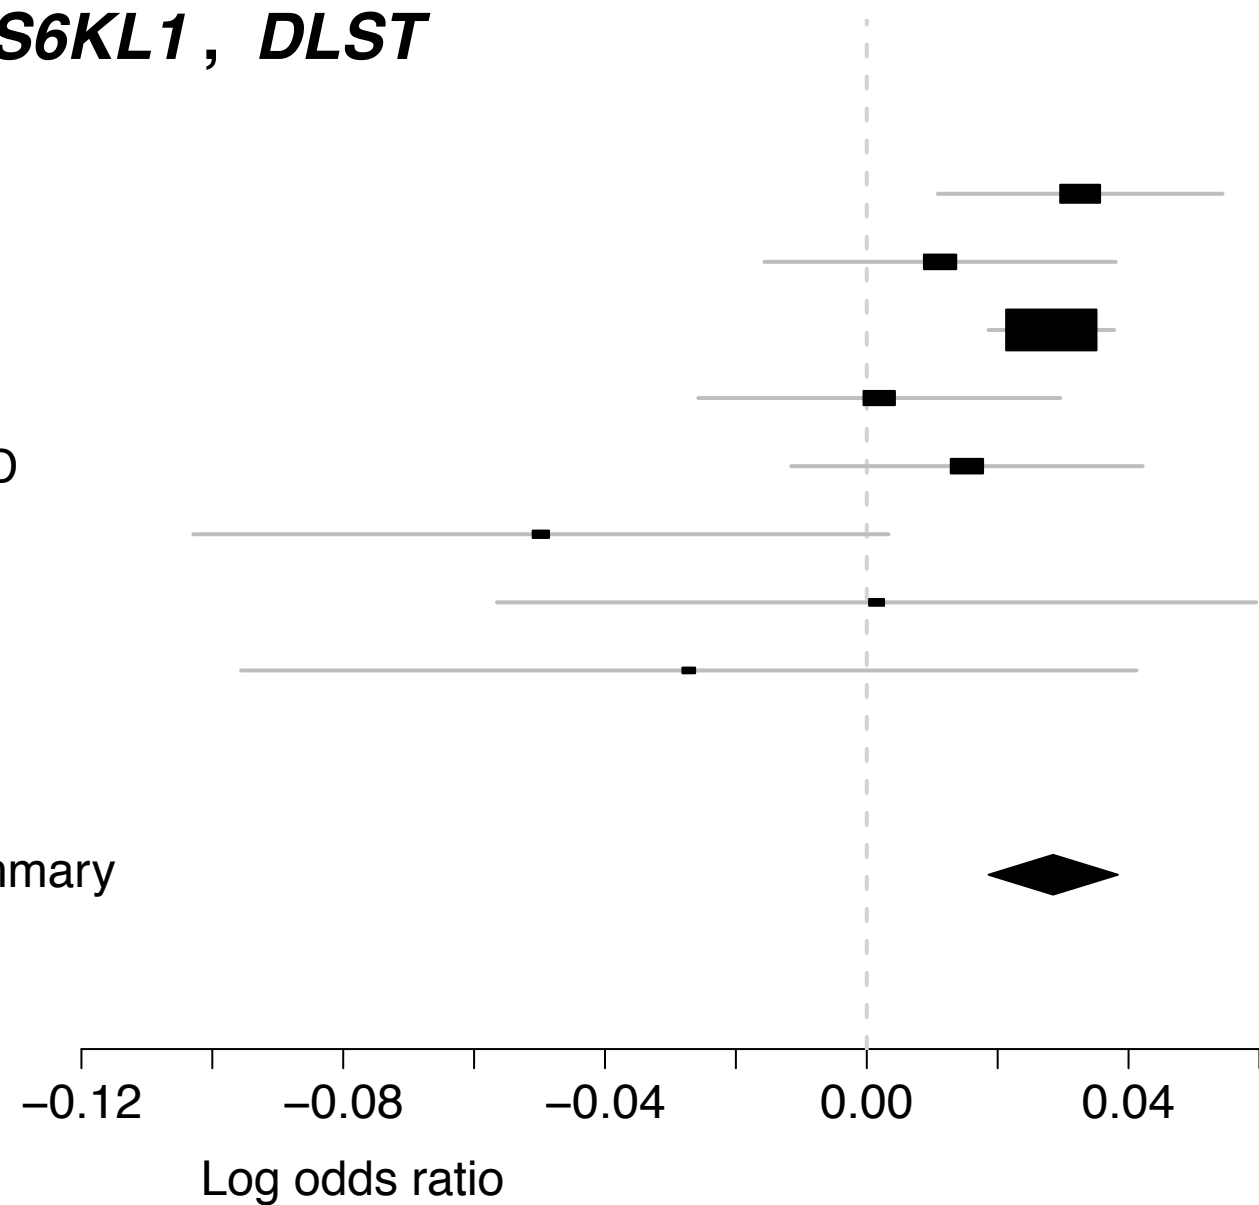

## PM-Plot

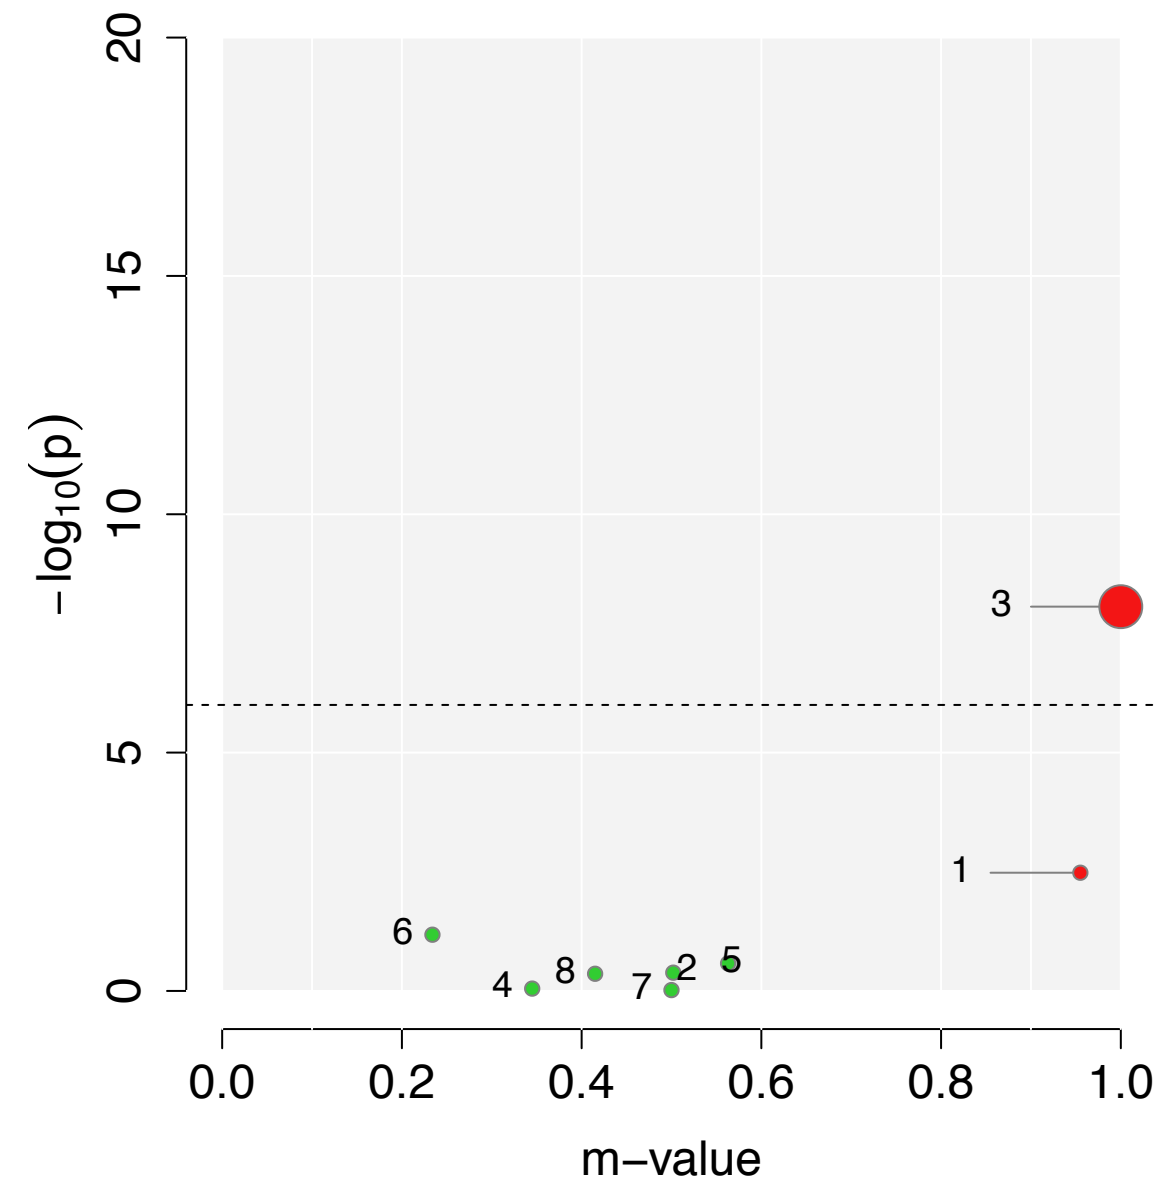

rs2047568 (Meta  $P = 4.3e \times 10^{-8}$ )

Gene : *SPPL3*, *ACADS*

GWAS P-value

- 0.0004 ● 1.SCZ
- 0.0044 ● 2.BIP
- $9.77 \times 10^{-7}$  ● 3.MD
- 0.3844 ● 4.ASD
- 0.4364 ● 5.ADHD
- 0.3731 ● 6.TS
- 0.4305 ● 7.ANO
- 0.6930 ● 8.OCD

FE summary

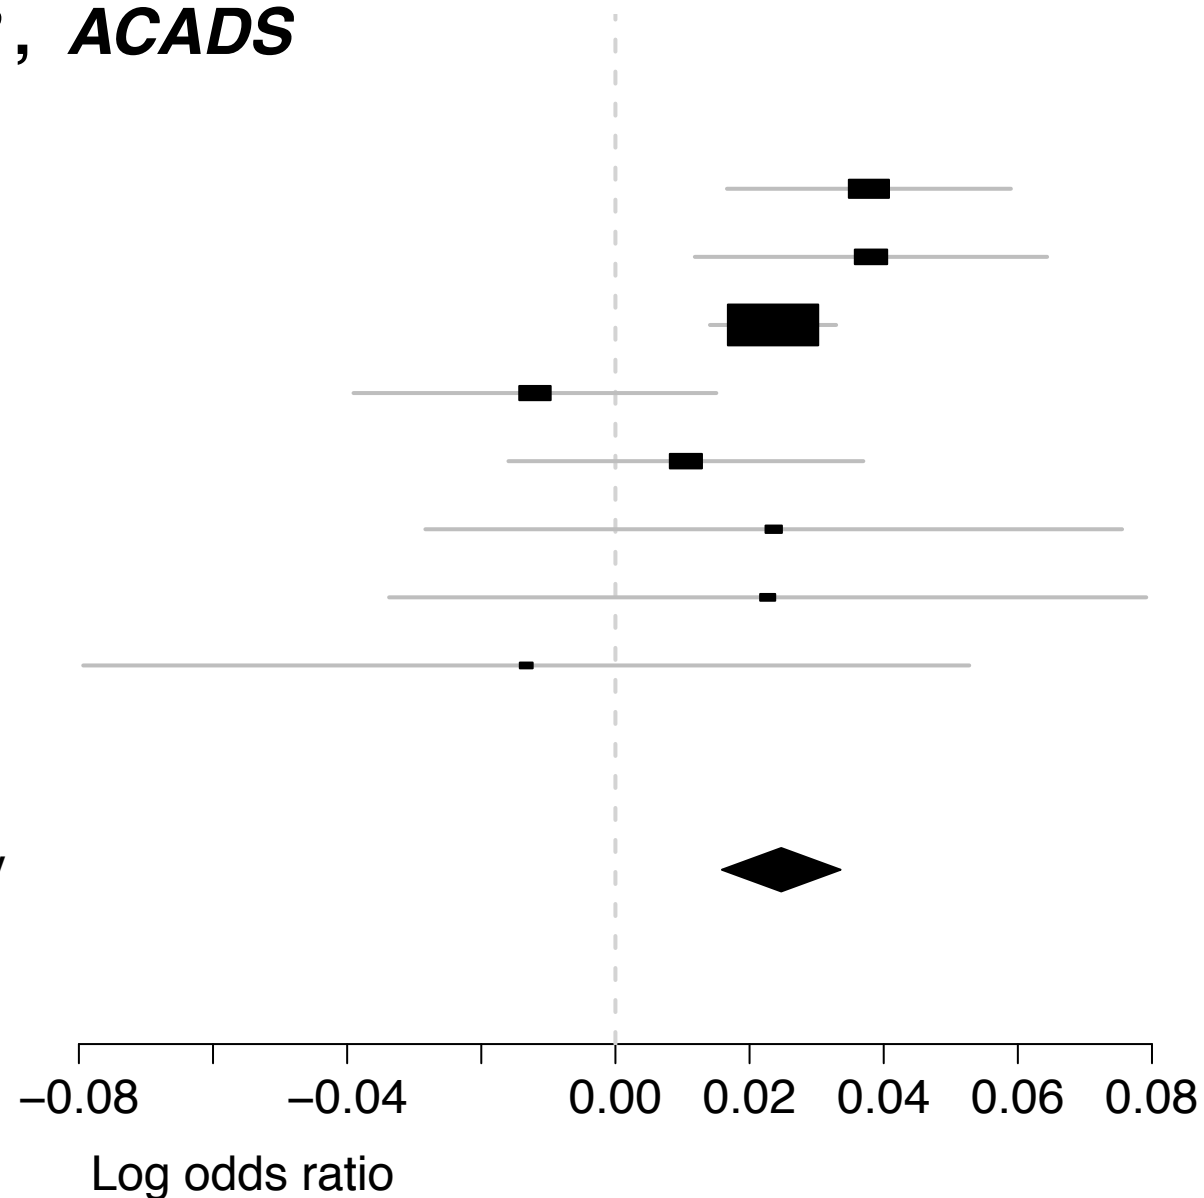

PM-Plot

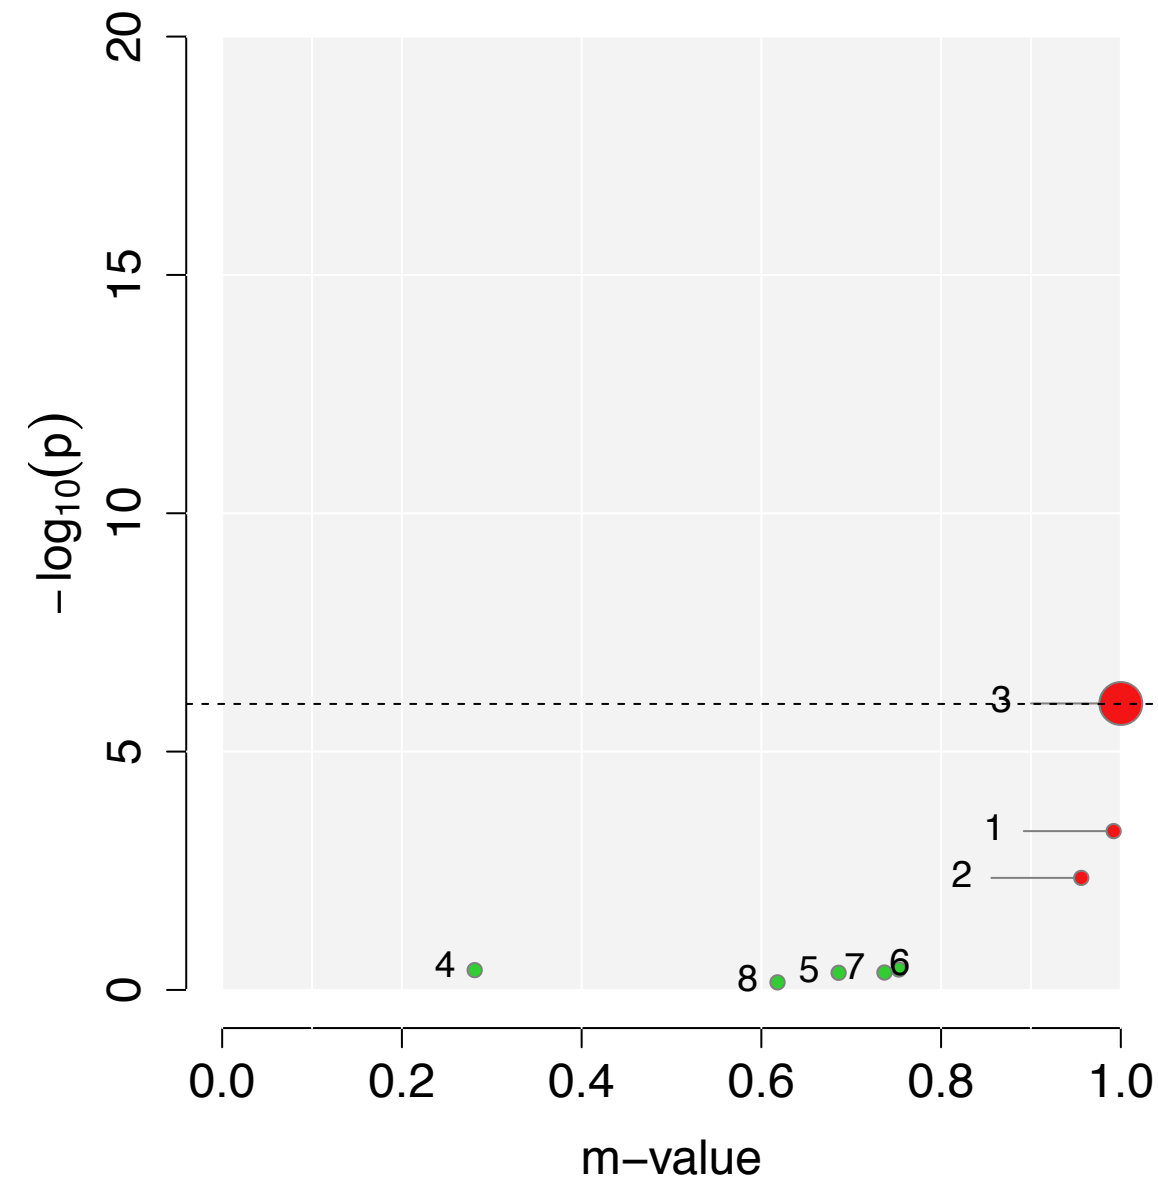



# rs2057884 (Meta $P = 3.68 \times 10^{-10}$ )

Gene : *SRPK2*

## GWAS P-value

- 1.86 x 10<sup>-9</sup> ● 1.SCZ
- 0.0674 ● 2.BIP
- 0.0138 ● 3.MD
- 0.0005 ● 4.ASD
- 0.0025 ● 5.ADHD
- 0.2443 ● 6.TS
- 0.7256 ● 7.ANO
- 0.7156 ● 8.OCD

FE summary

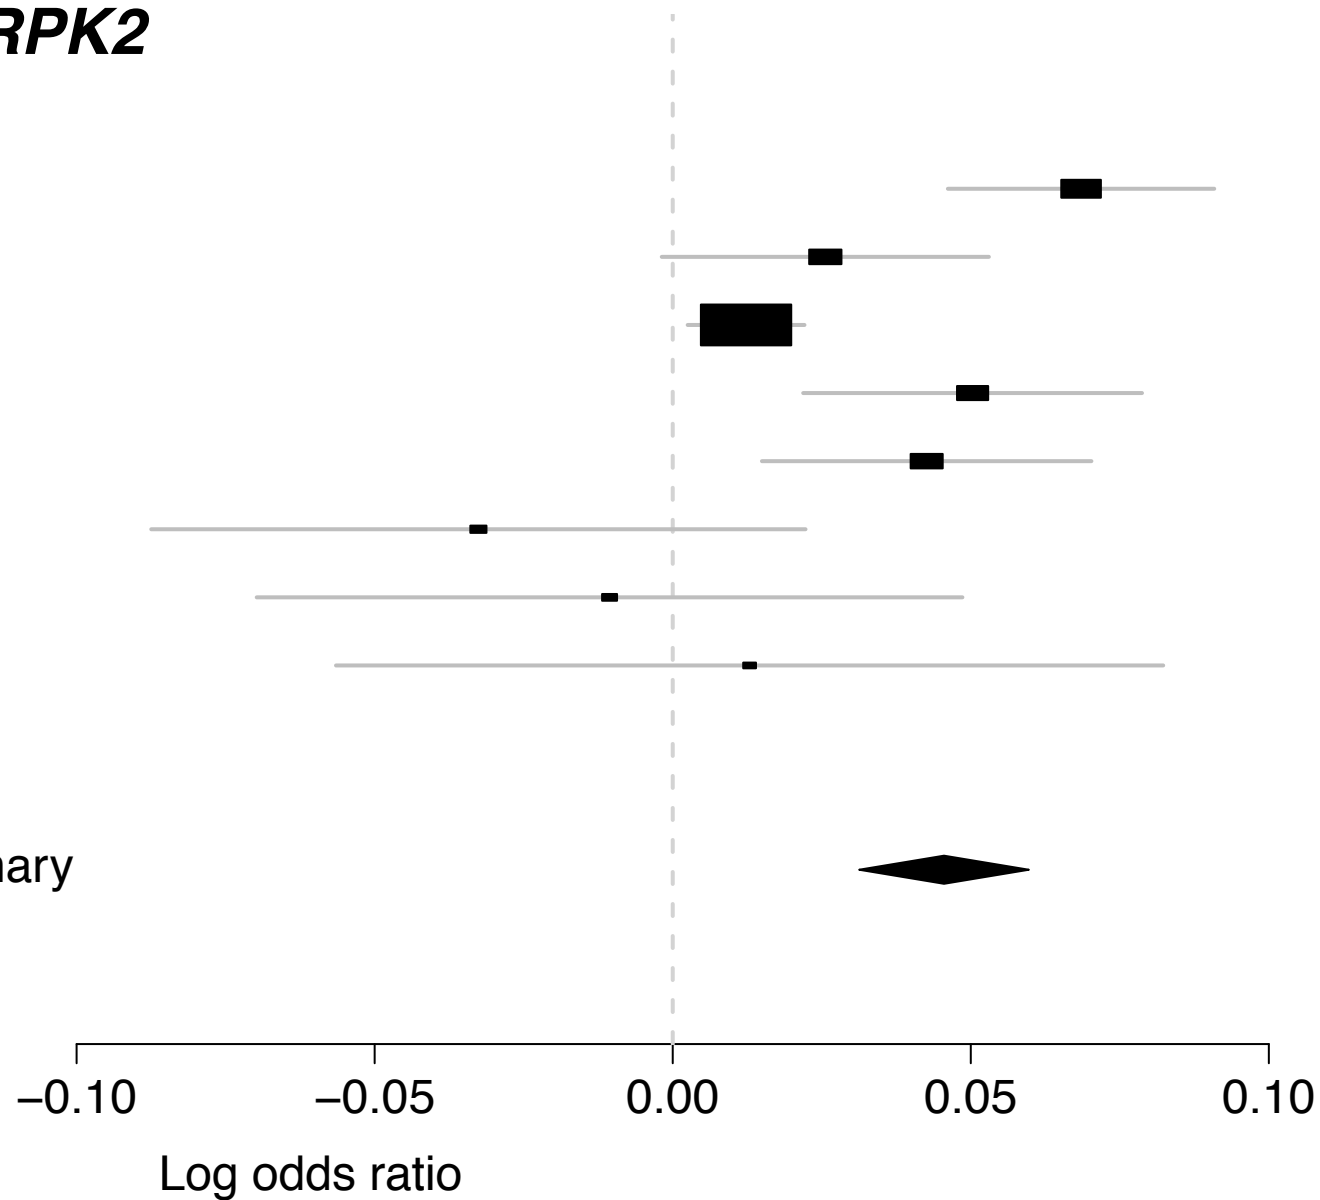

## PM-Plot

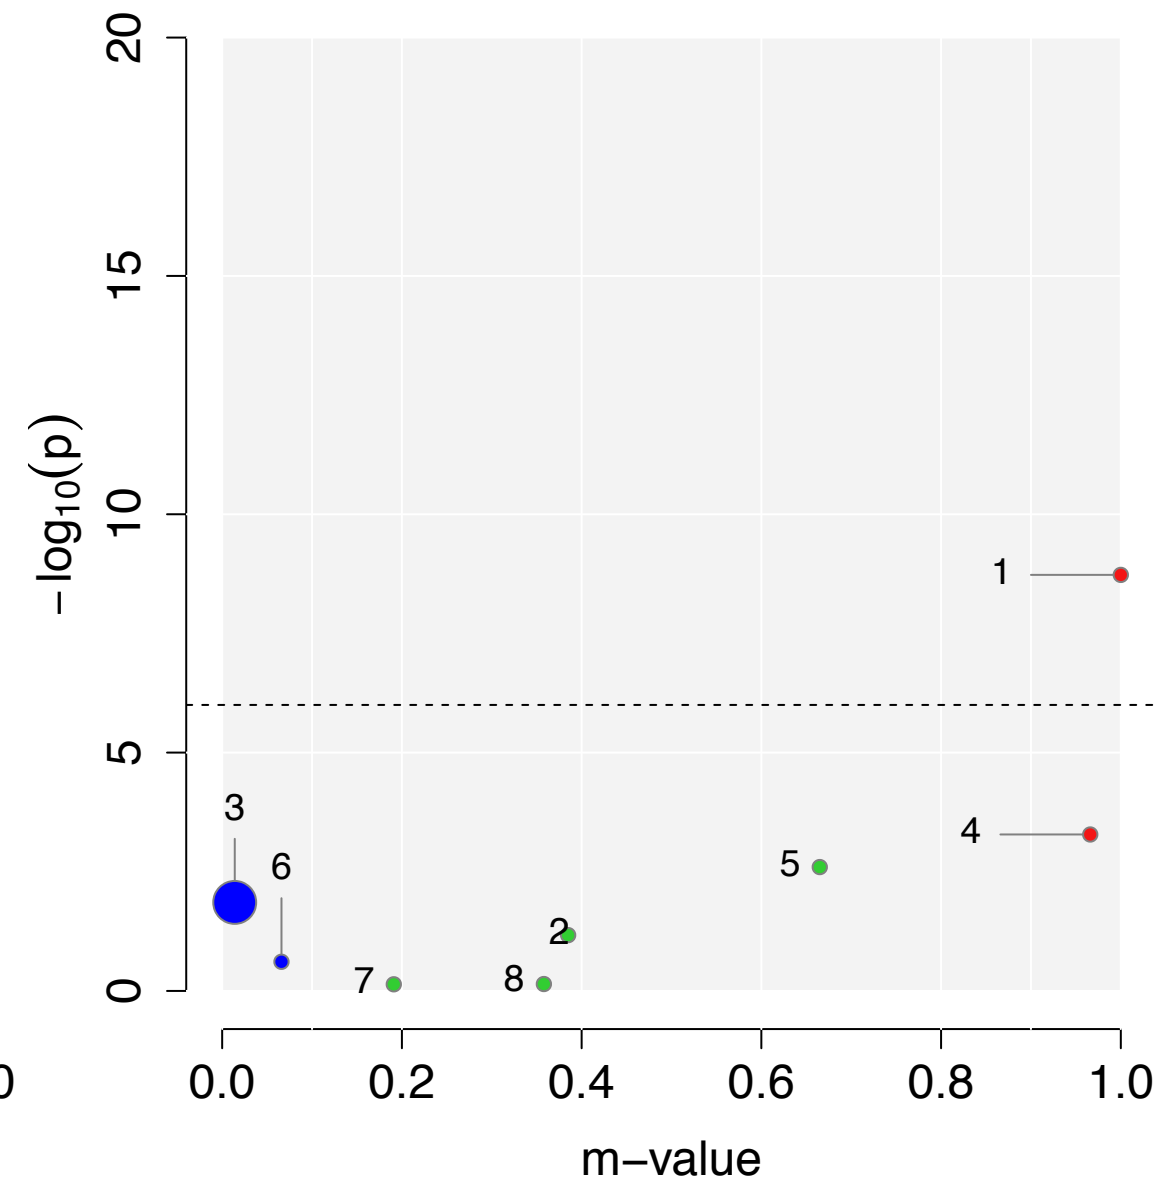

# rs2098651 (Meta $P = 7.06 \times 10^{-9}$ )

Gene : *TENM2*

## GWAS P-value

- 0.2245 ● 1.SCZ
- 0.0931 ● 2.BIP
- $9.75 \times 10^{-9}$  ● 3.MD
- 0.0164 ● 4.ASD
- 0.0025 ● 5.ADHD
- 0.1457 ● 6.TS
- 0.4392 ● 7.ANO
- 0.1313 ● 8.OCD

FE summary

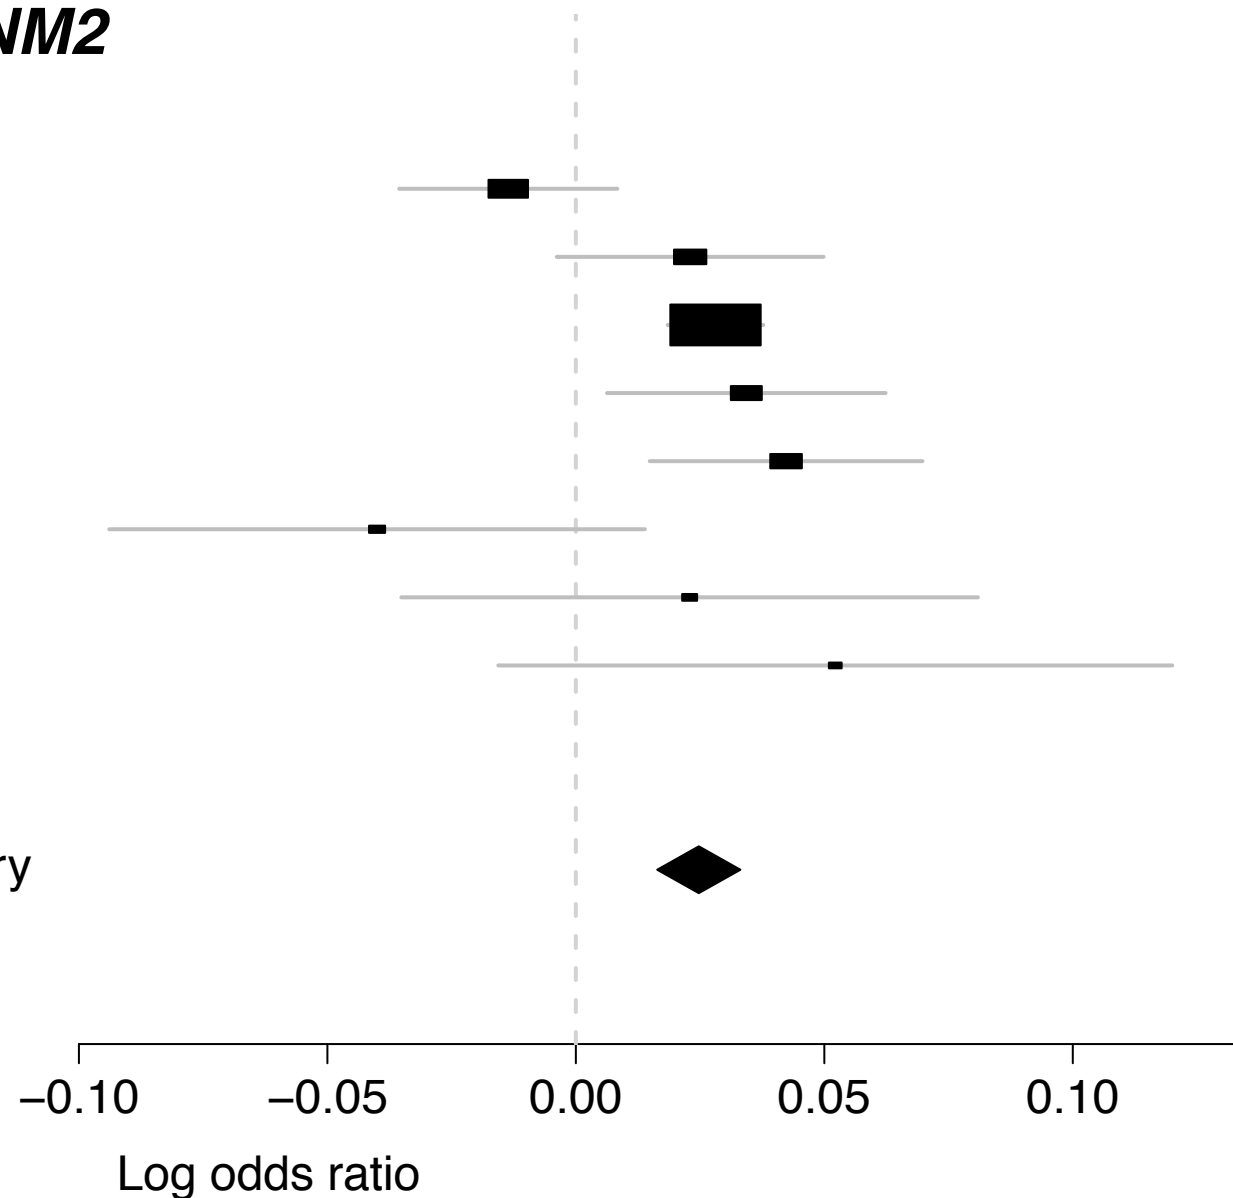

## PM-Plot

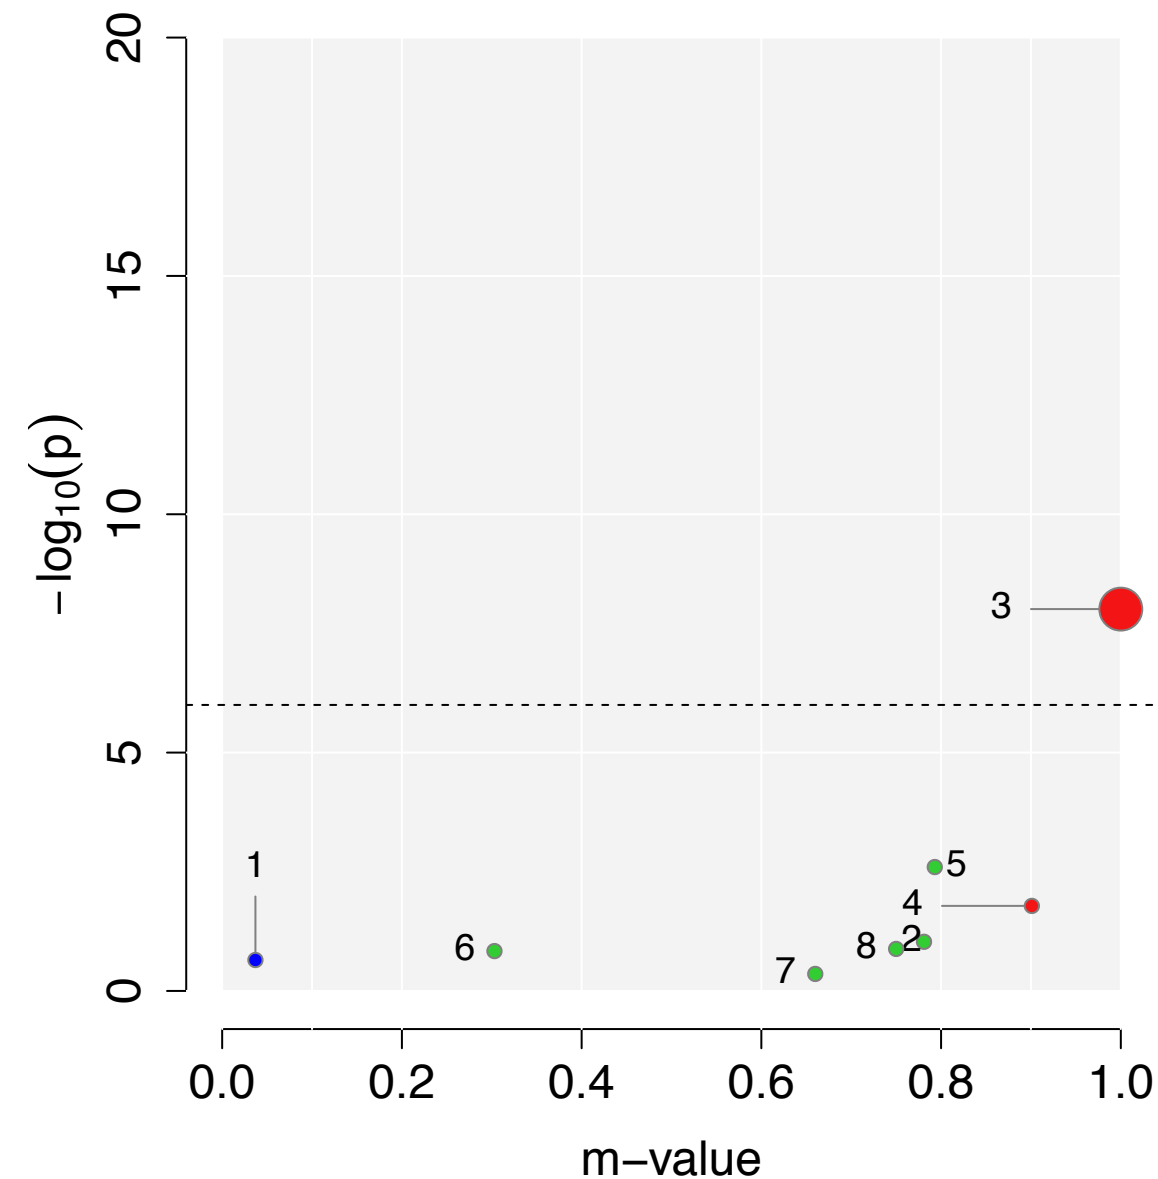

# rs2103655 (Meta $P = 1.07 \times 10^{-9}$ )

Gene : *PPP1R16B*, *ACTR5*

## GWAS P-value

- 1.21 x 10<sup>-10</sup> ● 1.SCZ
- 0.0806 ● 2.BIP
- 0.1127 ● 3.MD
- 0.9475 ● 4.ASD
- 0.2736 ● 5.ADHD
- 0.6443 ● 6.TS
- 0.8812 ● 7.ANO
- 0.0189 ● 8.OCD

FE summary

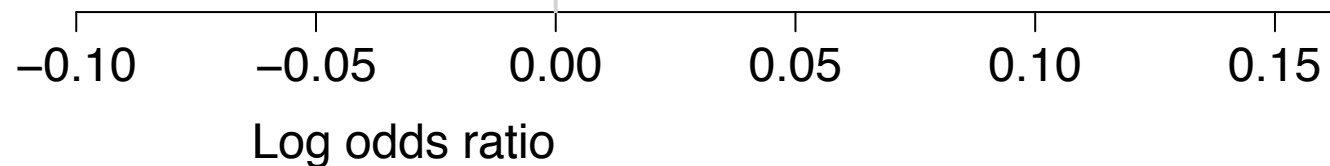

## PM-Plot

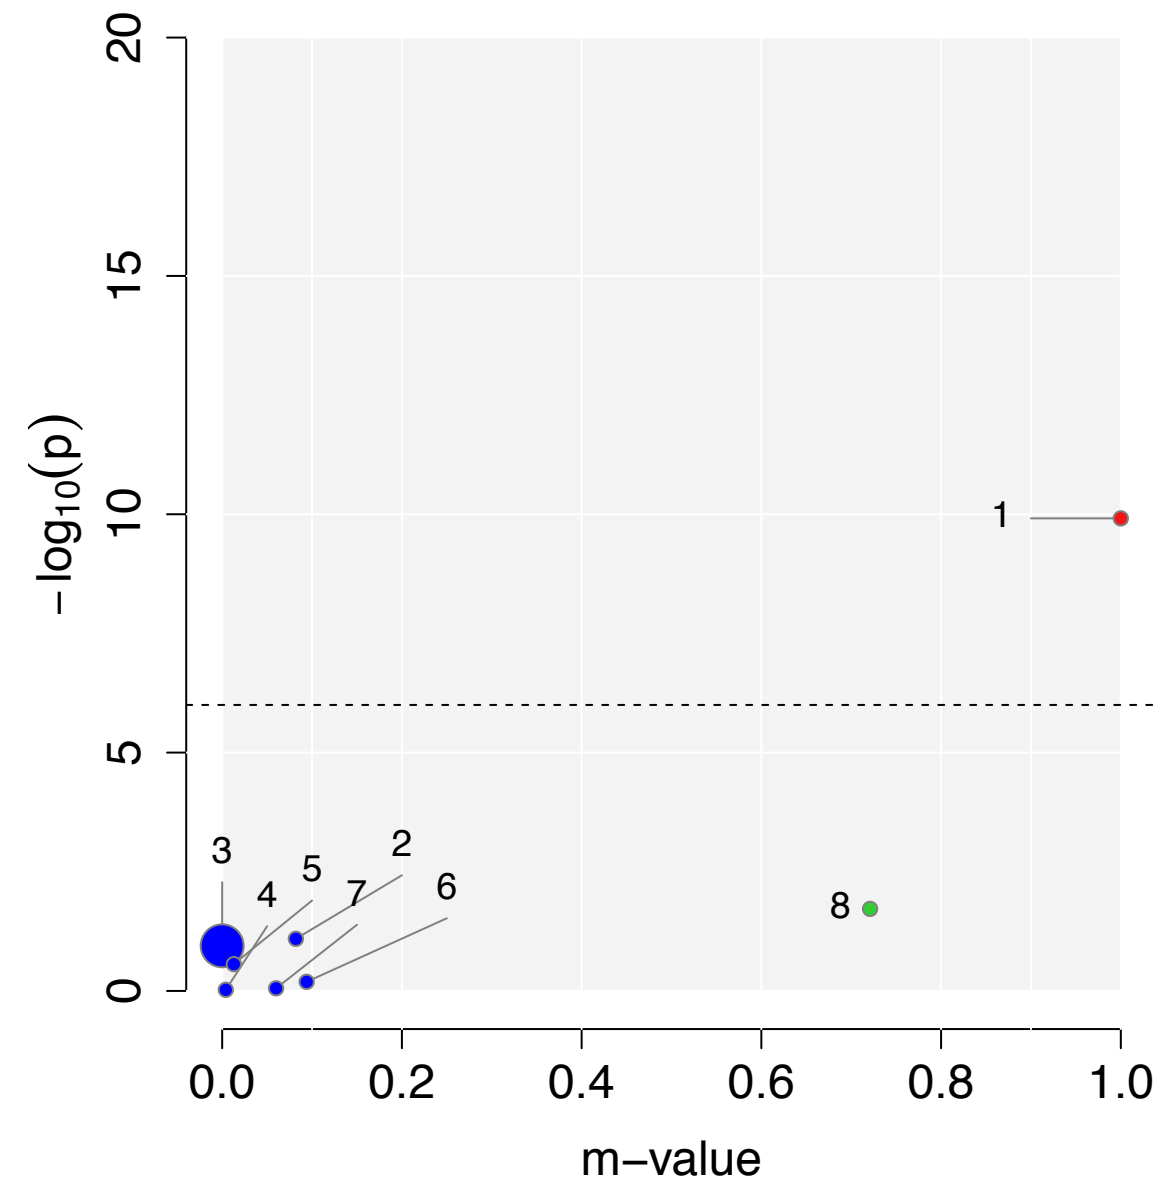

# rs2300861 (Meta $P = 8.39 \times 10^{-9}$ )

Gene : *AKAP6*

## GWAS P-value

- 1.14 x 10<sup>-5</sup> ● 1.SCZ
- 0.0779 ● 2.BIP
- 0.4911 ● 3.MD
- 0.3421 ● 4.ASD
- 9.65 x 10<sup>-6</sup> ● 5.ADHD
- 0.0060 ● 6.TS
- 0.0547 ● 7.ANO
- 0.4607 ● 8.OCD

FE summary

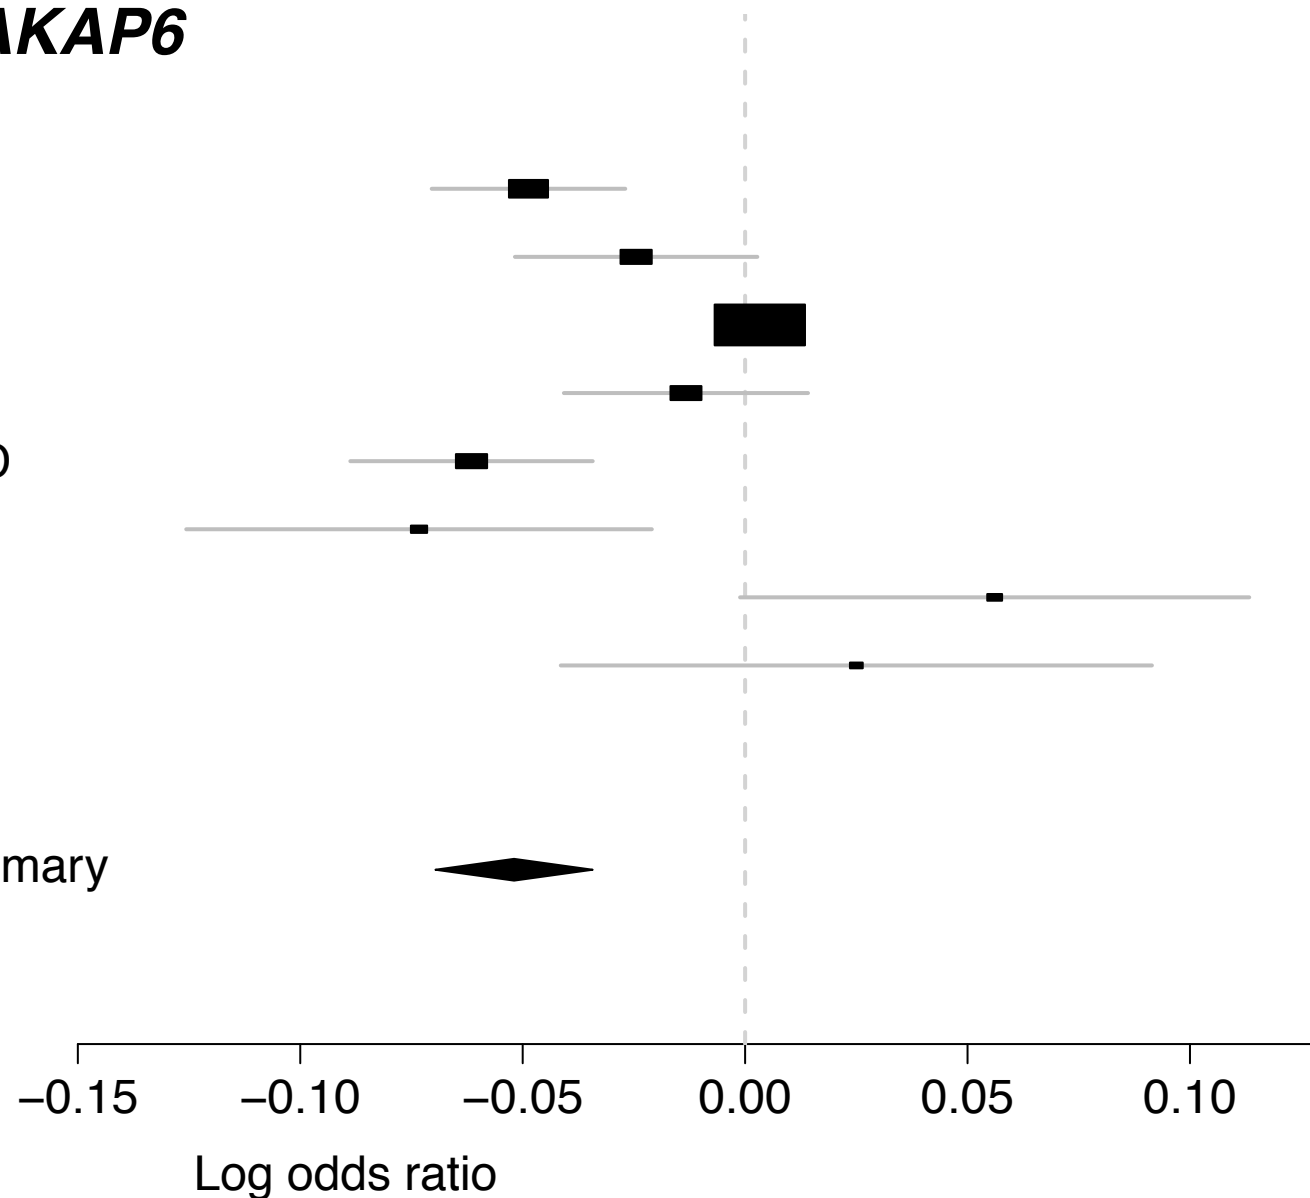

## PM-Plot

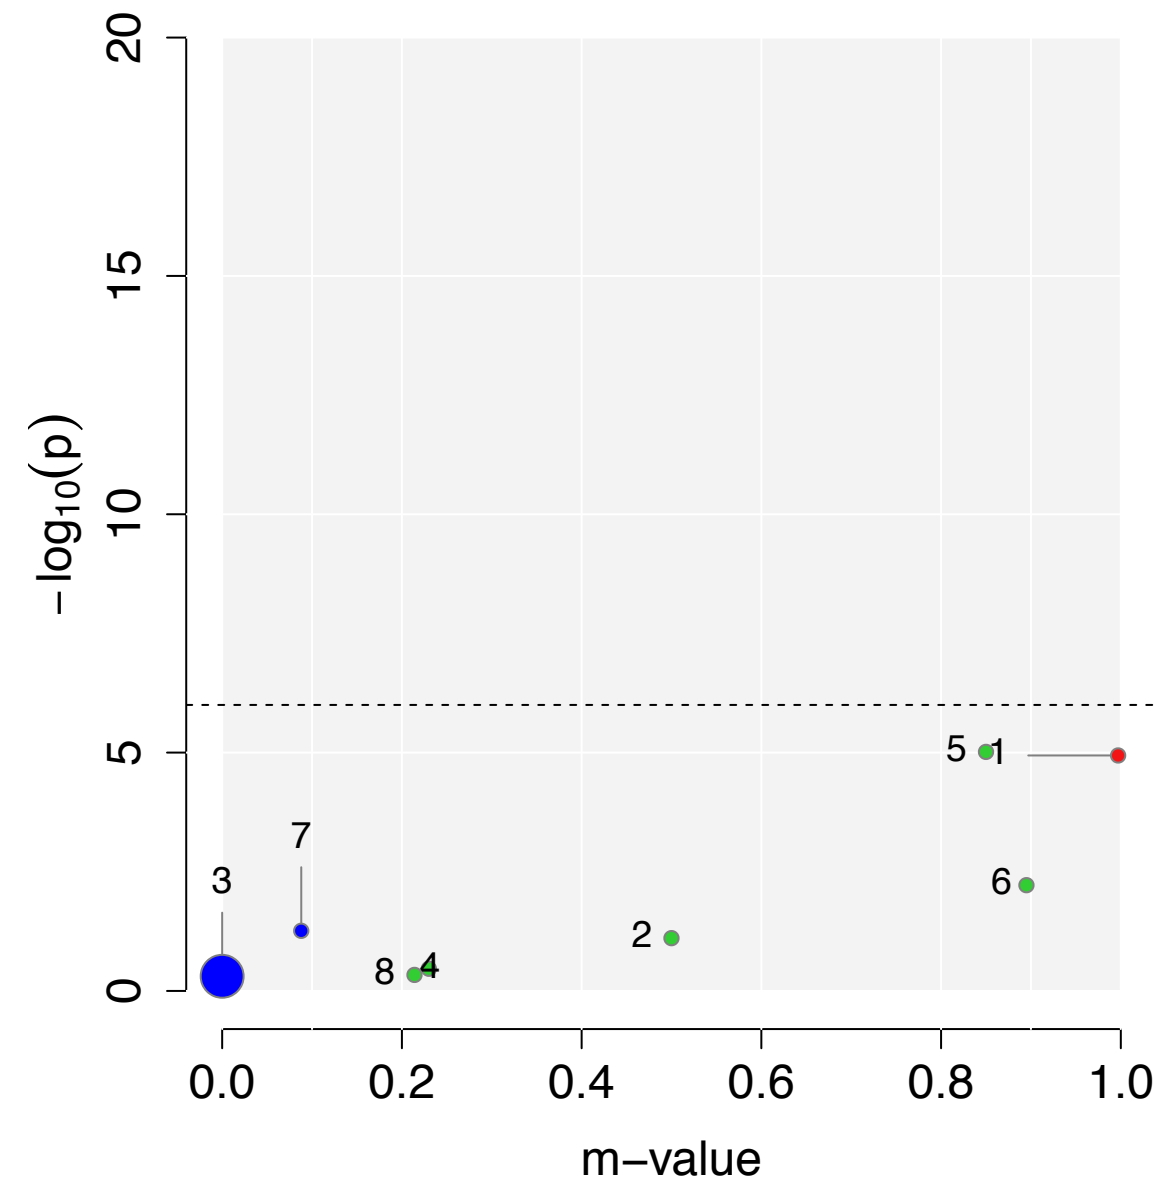

# rs2332700 (Meta $P = 4.5e \times 10^{-10}$ )

Gene : *RGS6*

## GWAS P-value

- 6.91 x 10<sup>-10</sup> ● 1.SCZ
- 0.0360 ● 2.BIP
- 7.37 x 10<sup>-6</sup> ● 3.MD
- 0.0329 ● 4.ASD
- 0.9031 ● 5.ADHD
- 0.6487 ● 6.TS
- 0.1897 ● 7.ANO
- 0.1956 ● 8.OCD

FE summary

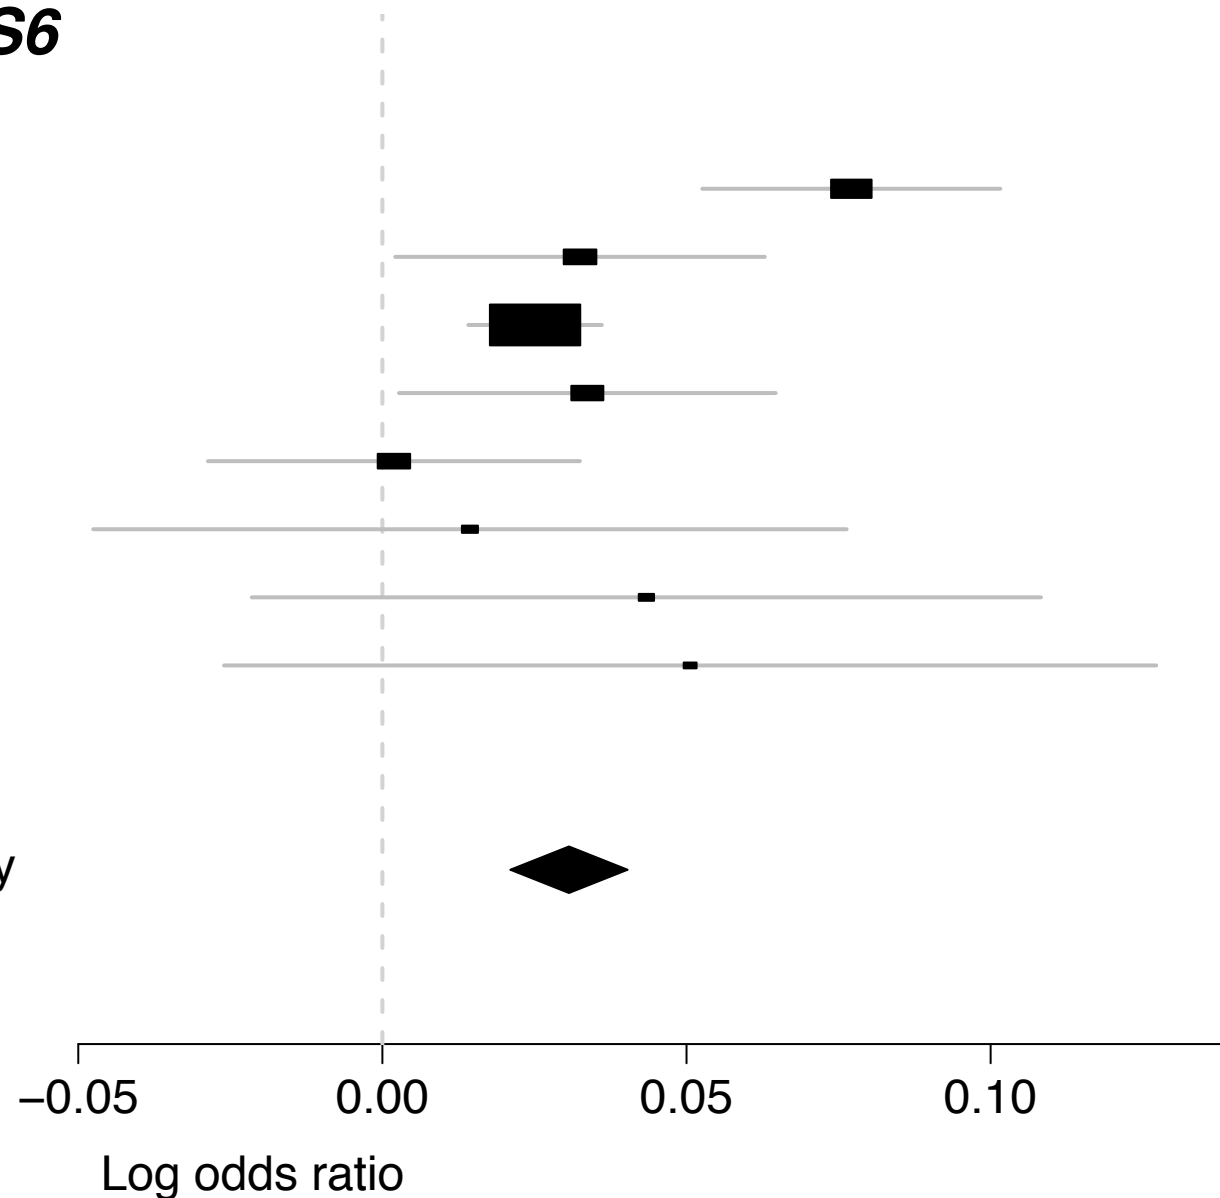

## PM-Plot

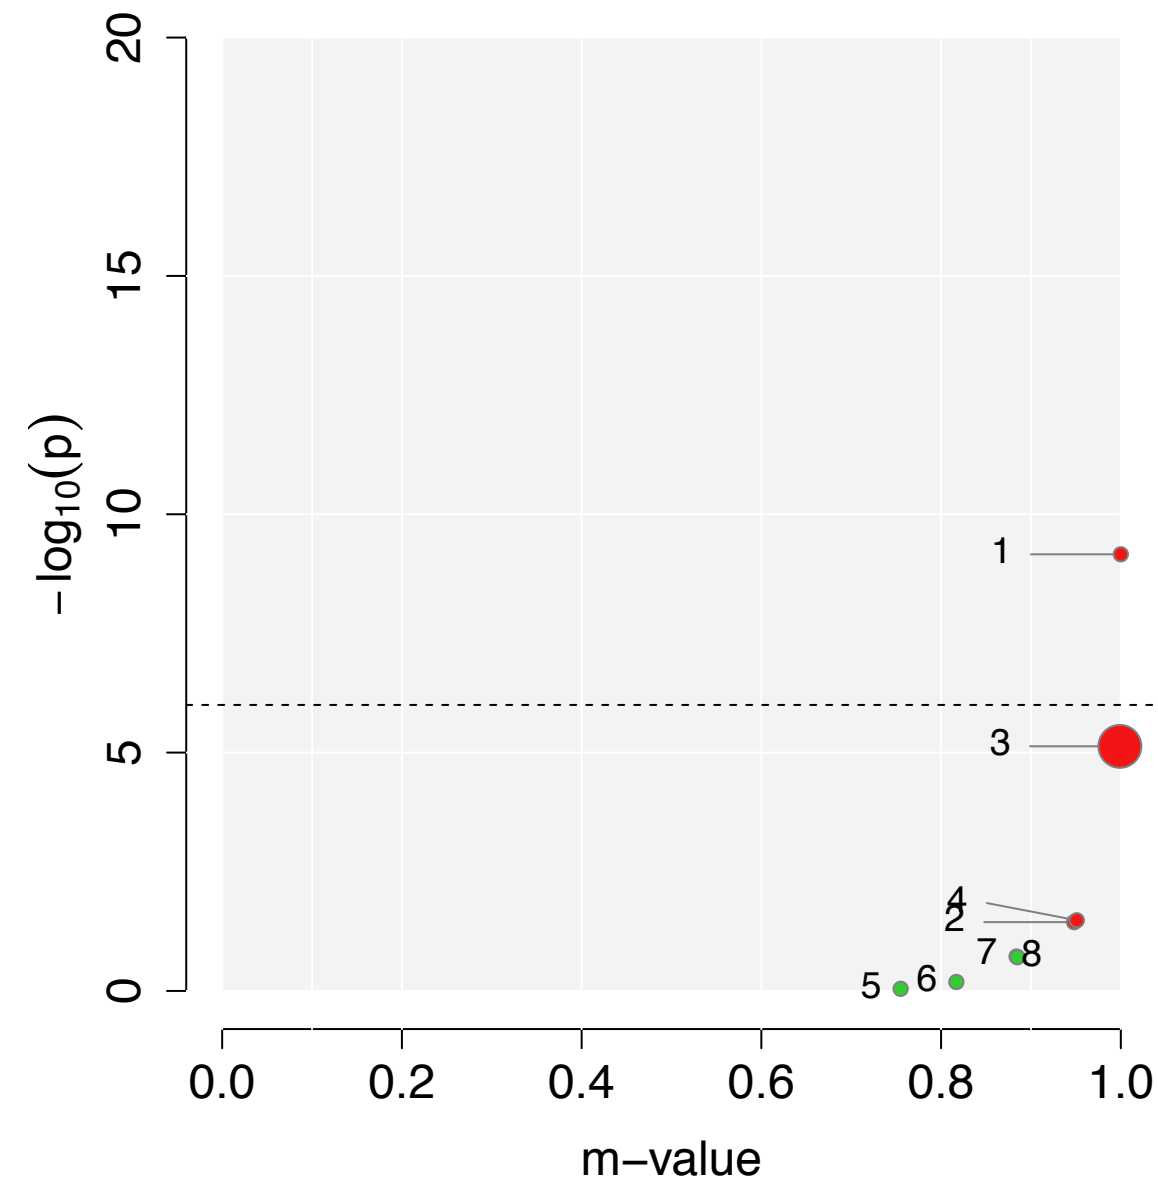

# rs2388334 (Meta $P = 1.48 \times 10^{-11}$ )

Gene : (>200kb)

## GWAS P-value

- 0.0025 ● 1.SCZ
- $8.27 \times 10^{-8}$  ● 2.BIP
- 0.3378 ● 3.MD
- $9.30 \times 10^{-7}$  ● 4.ASD
- 0.6250 ● 5.ADHD
- $9.51 \times 10^{-5}$  ● 6.TS
- 0.0553 ● 7.ANO
- 0.2511 ● 8.OCD

FE summary

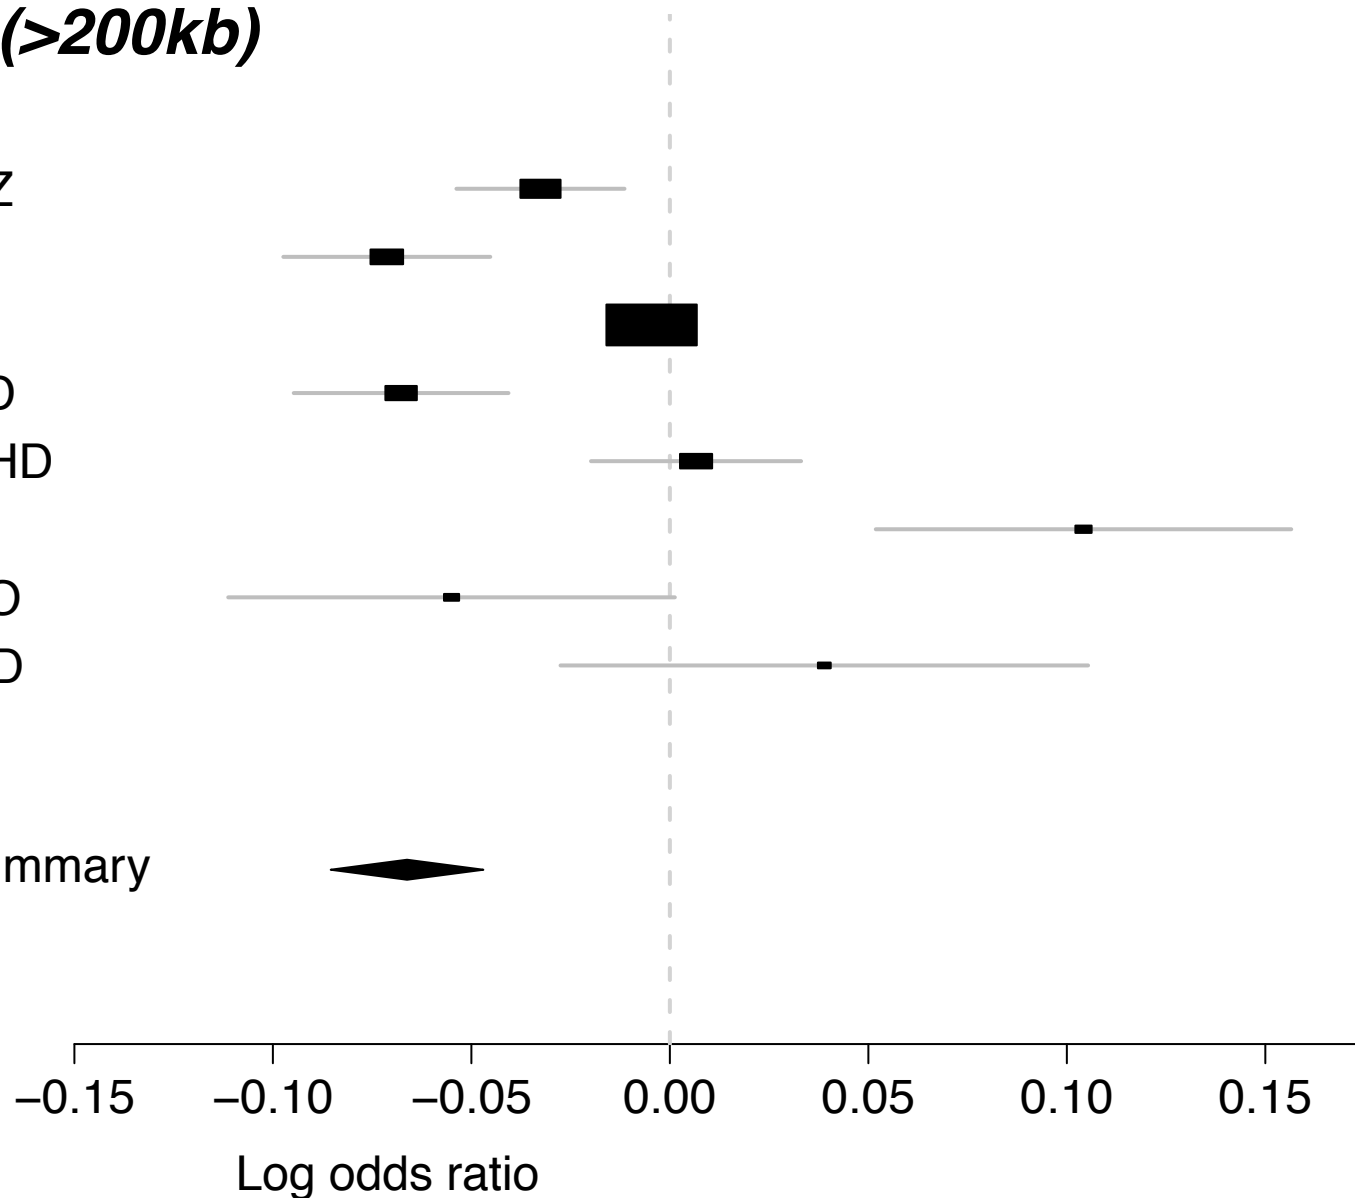

## PM-Plot

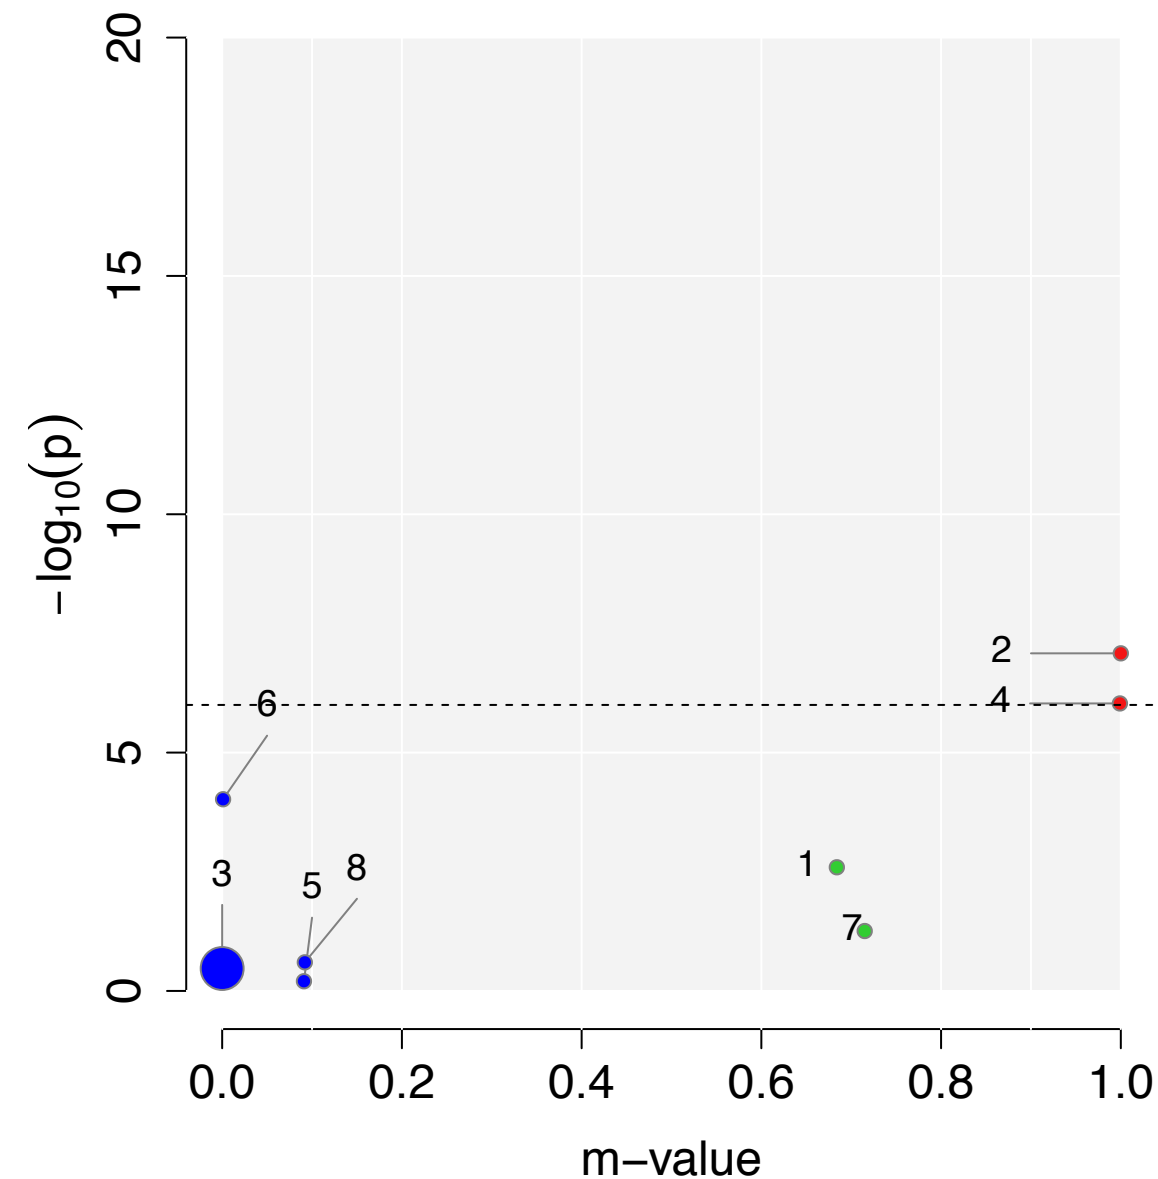



# rs2391734 (Meta $P = 1.5e \times 10^{-8}$ )

Gene : (>200kb)

## GWAS P-value

- 0.6114 ● 1.SCZ
- 0.3238 ● 2.BIP
- 0.0885 ● 3.MD
- $3.87 \times 10^{-7}$  ● 4.ASD
- $6.80 \times 10^{-8}$  ● 5.ADHD
- 0.0641 ● 6.TS
- 0.7727 ● 7.ANO
- 0.7565 ● 8.OCD

FE summary

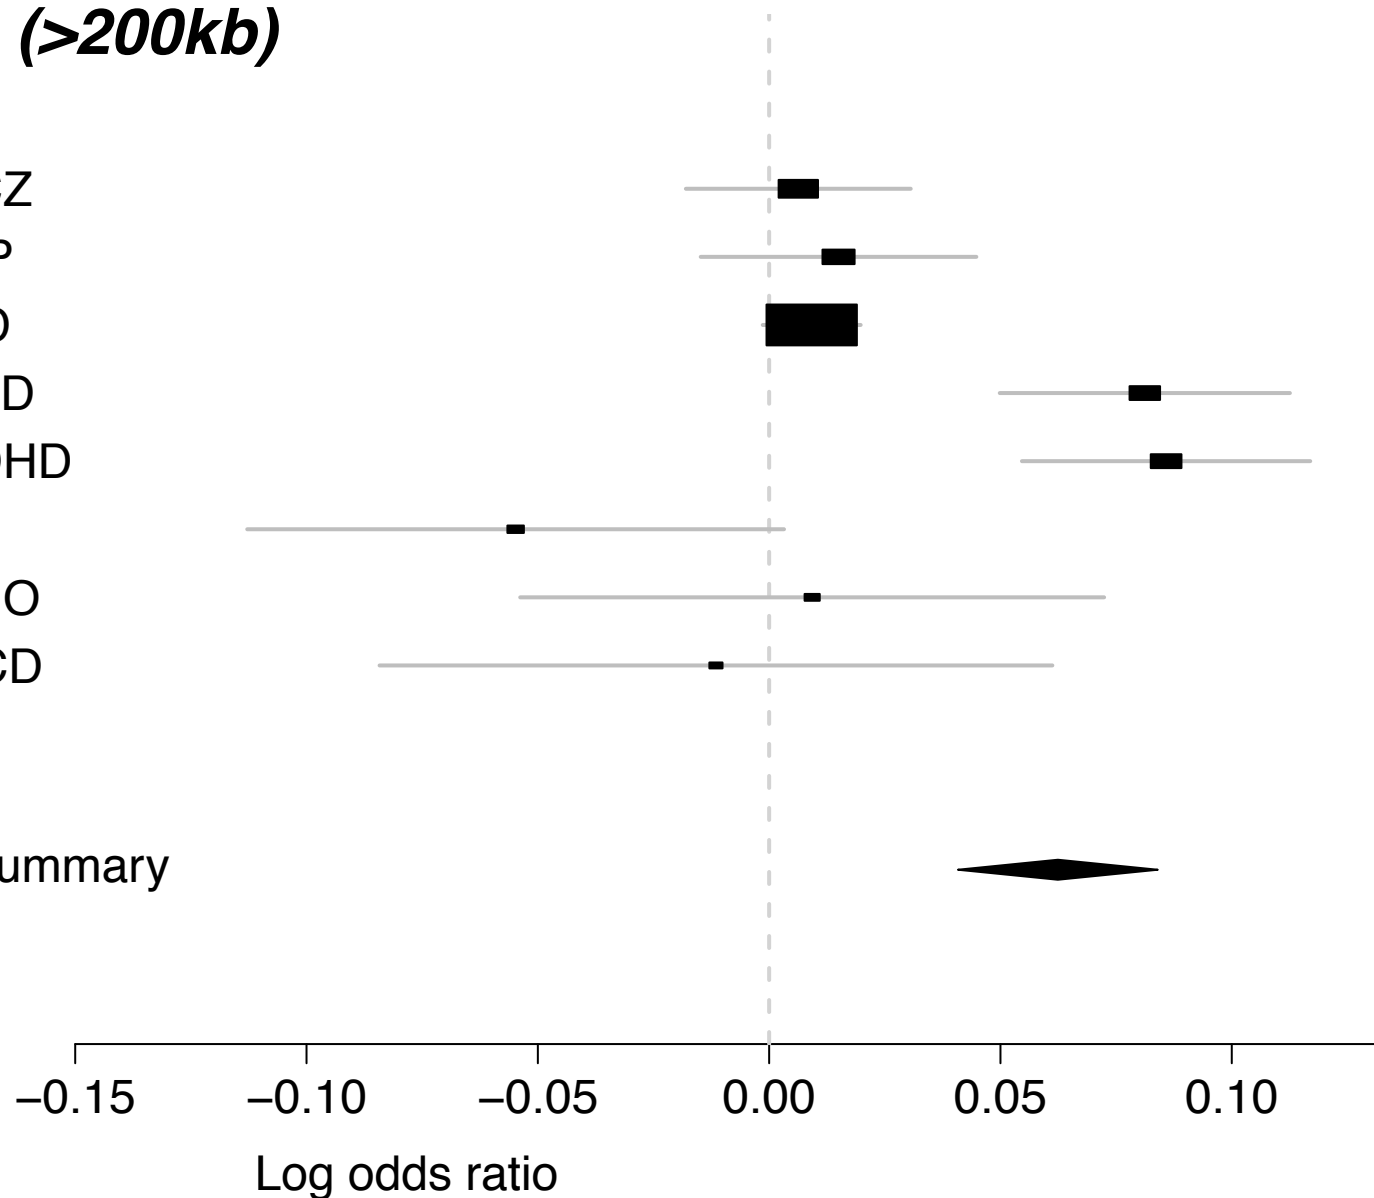

## PM-Plot

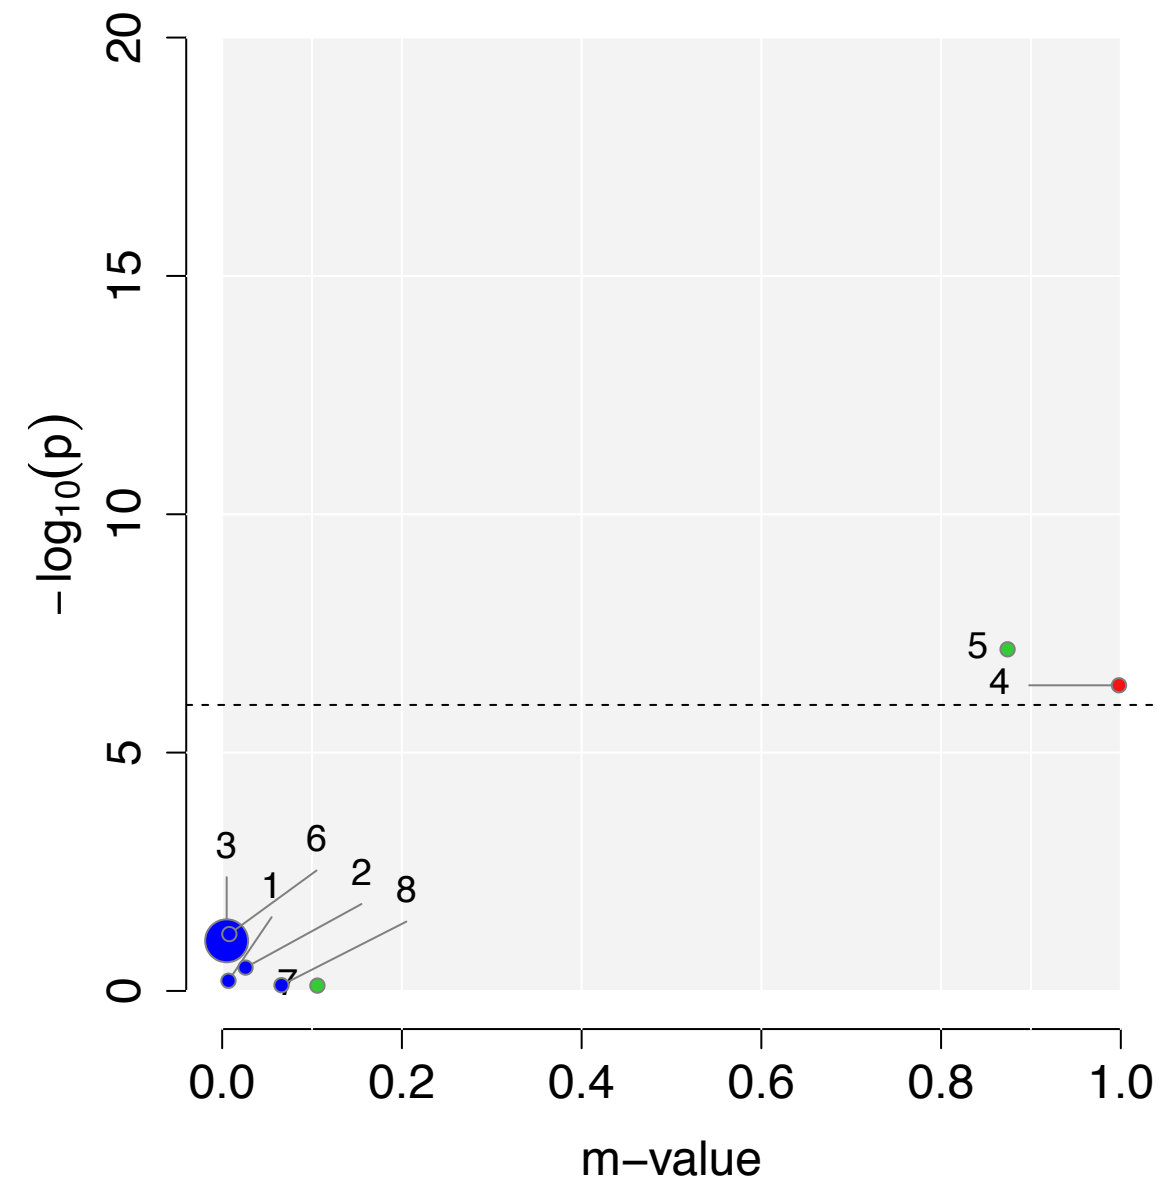

# rs2391769 (Meta $P = 8.23 \times 10^{-9}$ )

Gene : (>200kb)

## GWAS P-value

- 0.4464 ● 1.SCZ
- 0.2938 ● 2.BIP
- 0.8572 ● 3.MD
- $1.13 \times 10^{-7}$  ● 4.ASD
- $9.50 \times 10^{-8}$  ● 5.ADHD
- 0.8253 ● 6.TS
- 0.4295 ● 7.ANO
- 0.6369 ● 8.OCD

FE summary

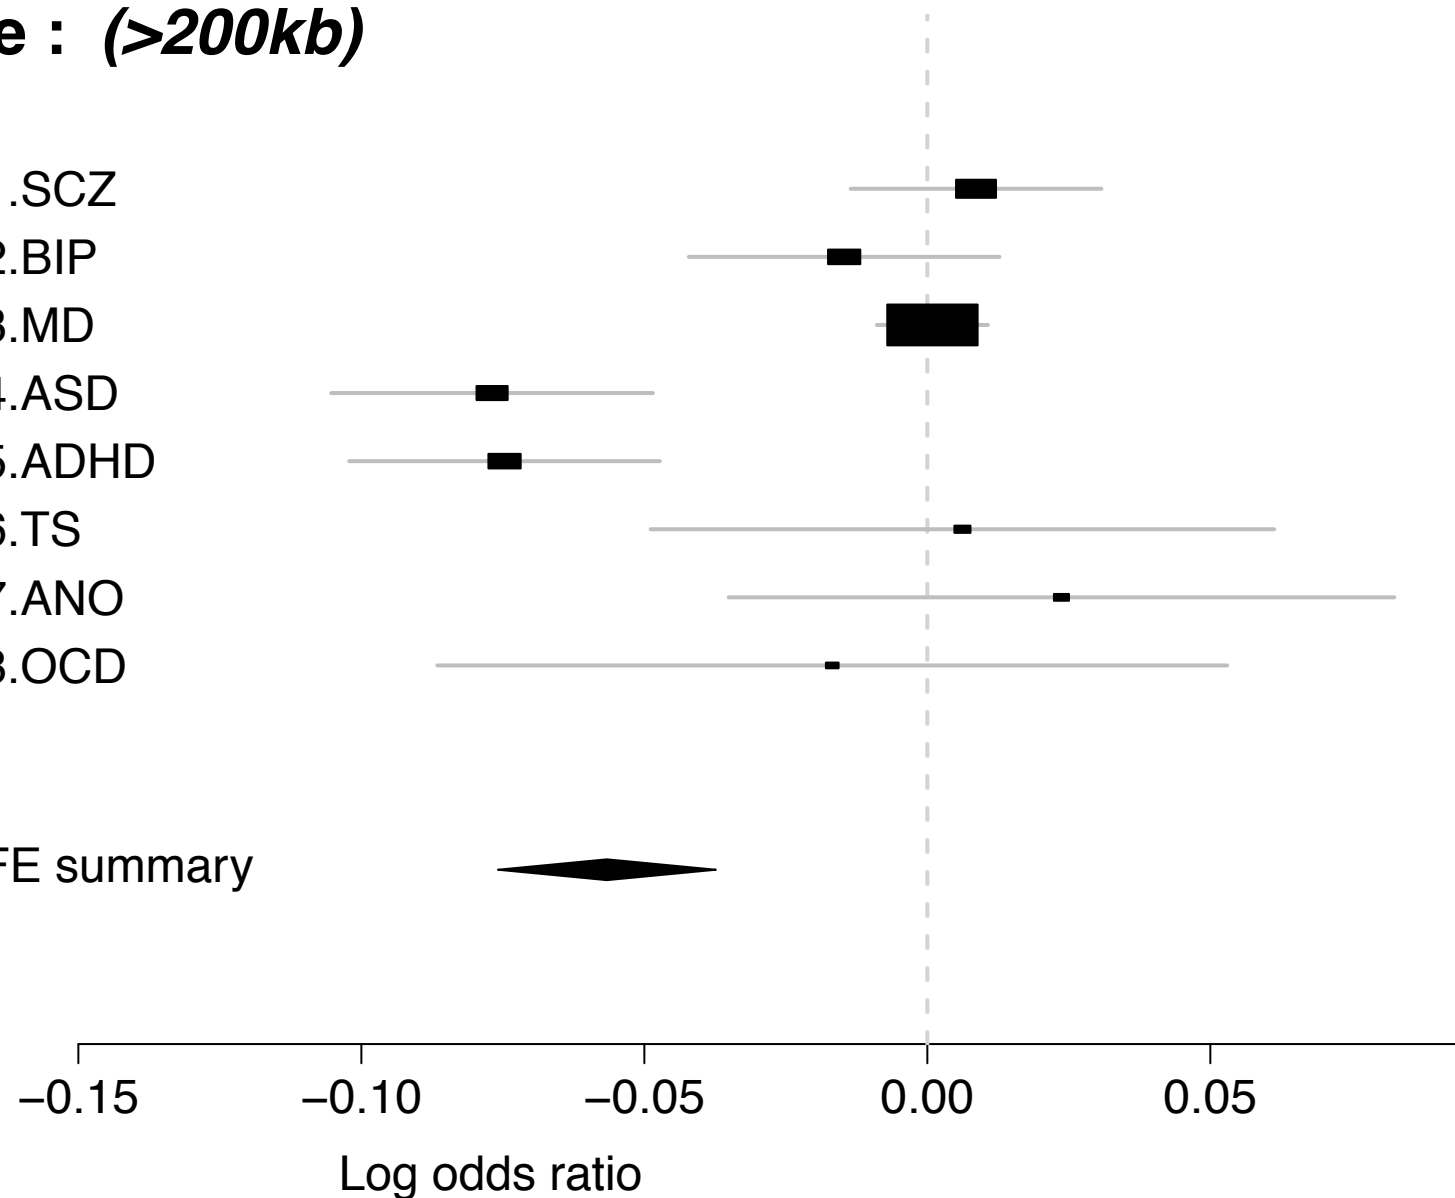

## PM-Plot

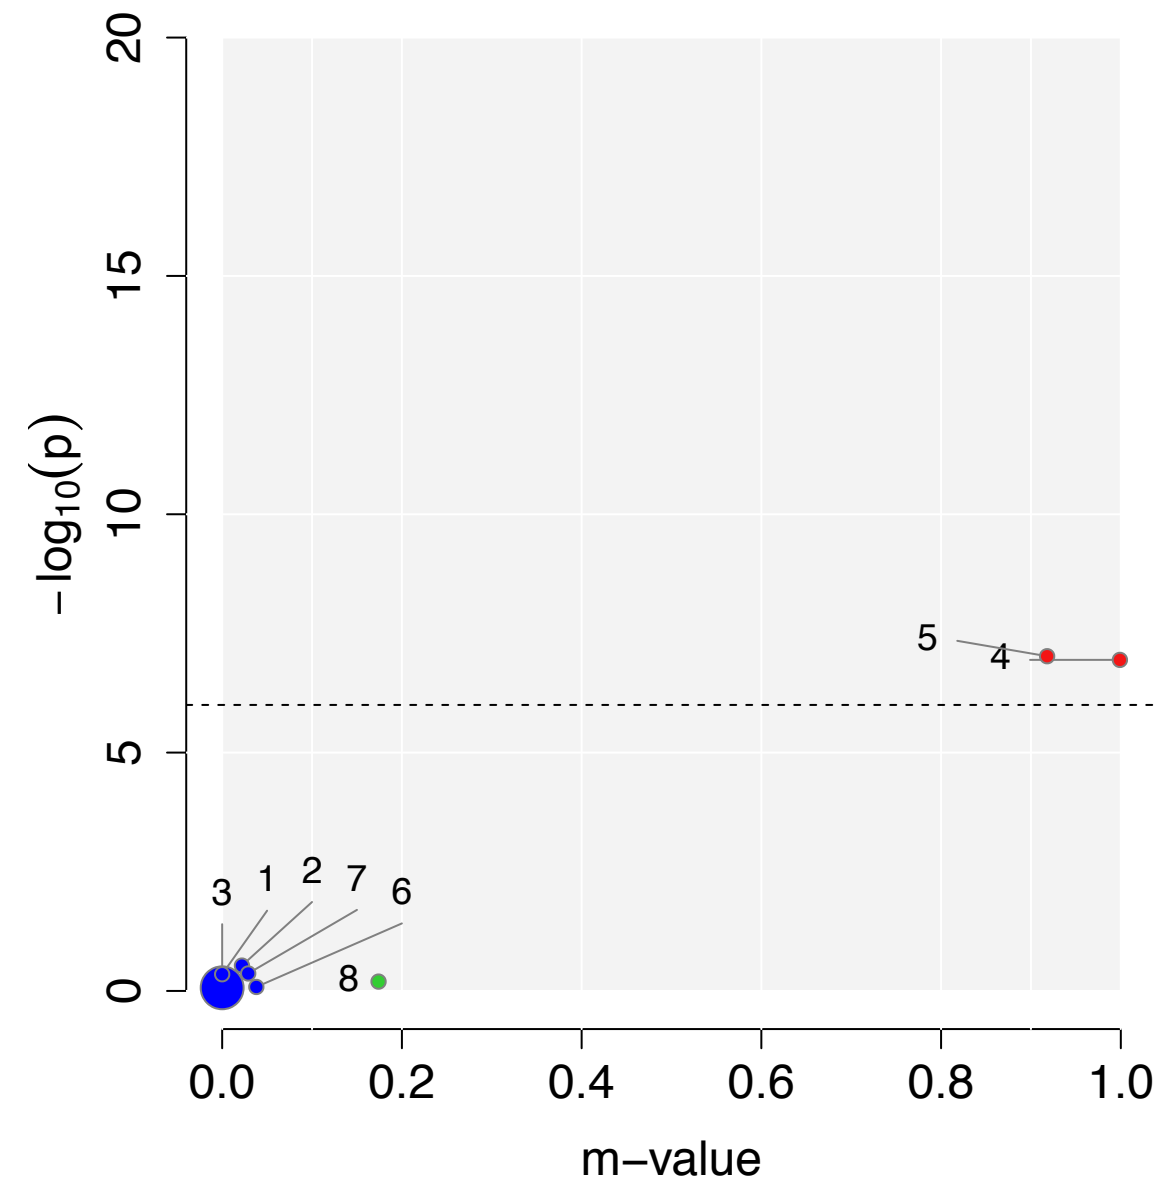

# rs2414718 (Meta $P = 1.36 \times 10^{-8}$ )

Gene : (>200kb)

## GWAS P-value

$2.22 \times 10^{-10}$

1.SCZ

0.0087

2.BIP

0.5821

3.MD

0.8412

4.ASD

0.0065

5.ADHD

0.1321

6.TS

0.7076

7.ANO

0.1895

8.OCD

FE summary

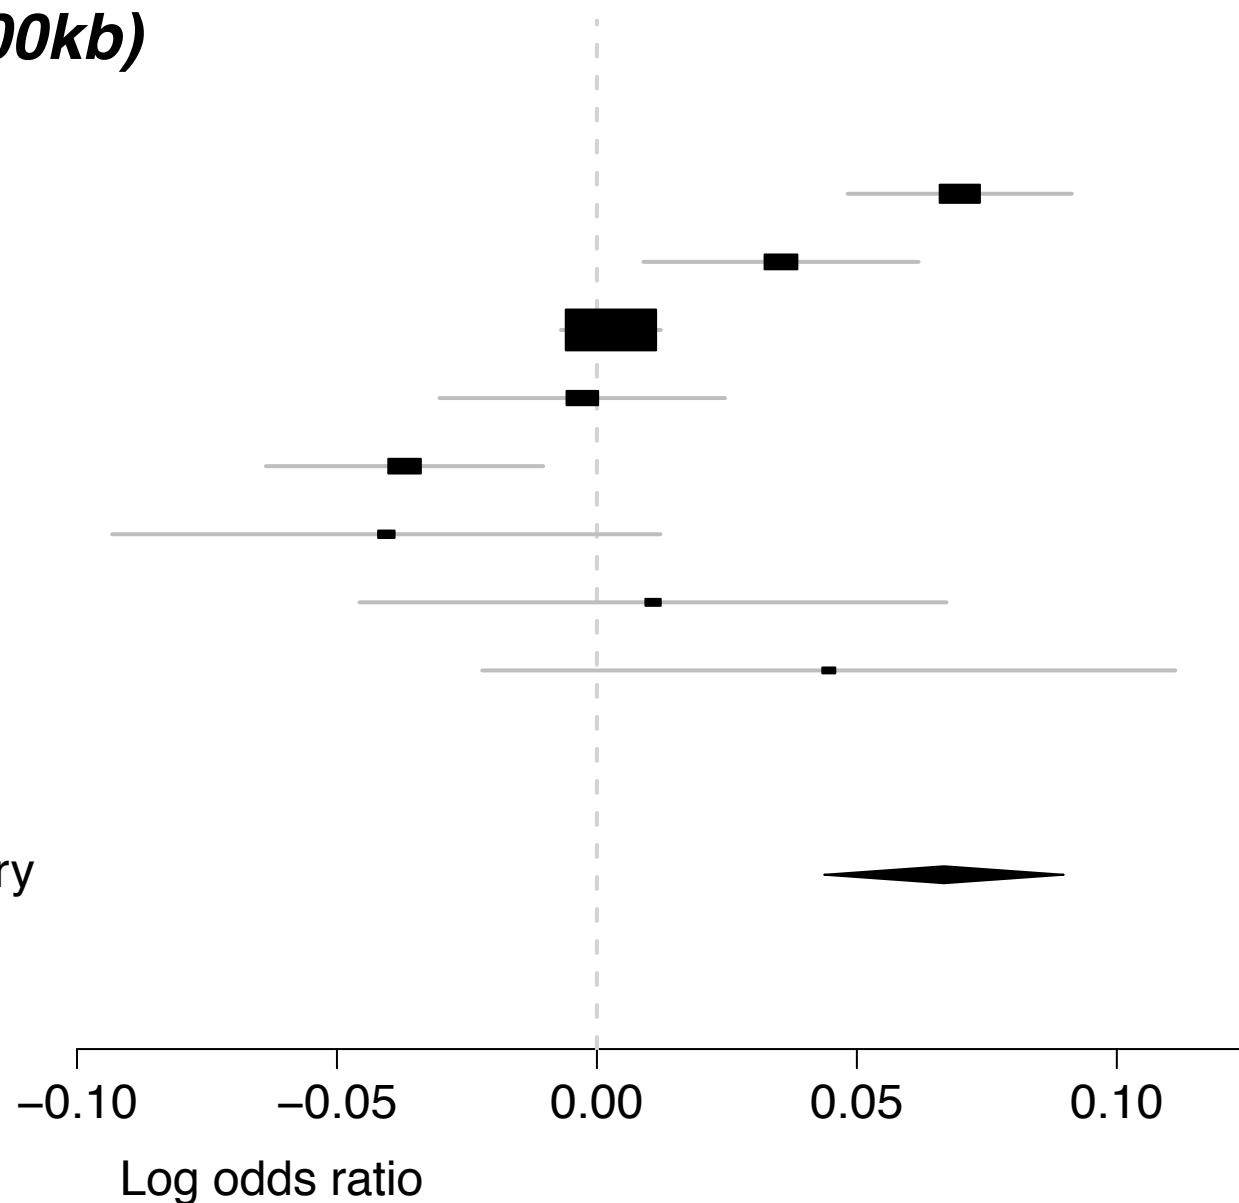

## PM-Plot

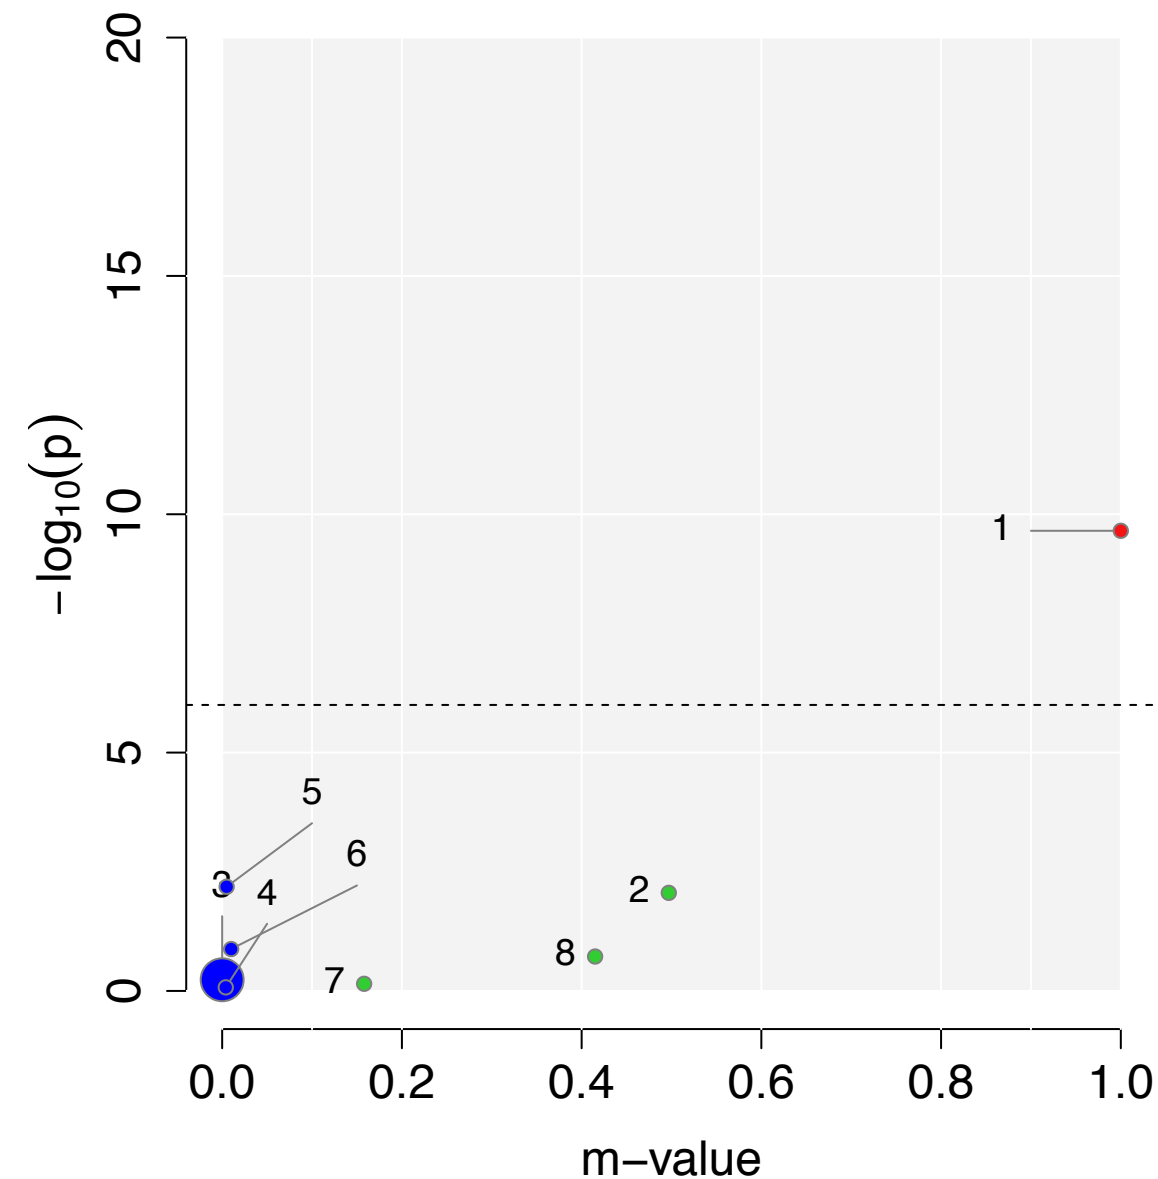

# rs2514218 (Meta $P = 1.58 \times 10^{-11}$ )

Gene : *DRD2*

## GWAS P-value

- 4.82 x 10<sup>-10</sup> ● 1.SCZ
- 0.0006 ● 2.BIP
- 3.77 x 10<sup>-7</sup> ● 3.MD
- 0.6562 ● 4.ASD
- 0.1772 ● 5.ADHD
- 0.4333 ● 6.TS
- 0.1535 ● 7.ANO
- 0.2341 ● 8.OCD

FE summary

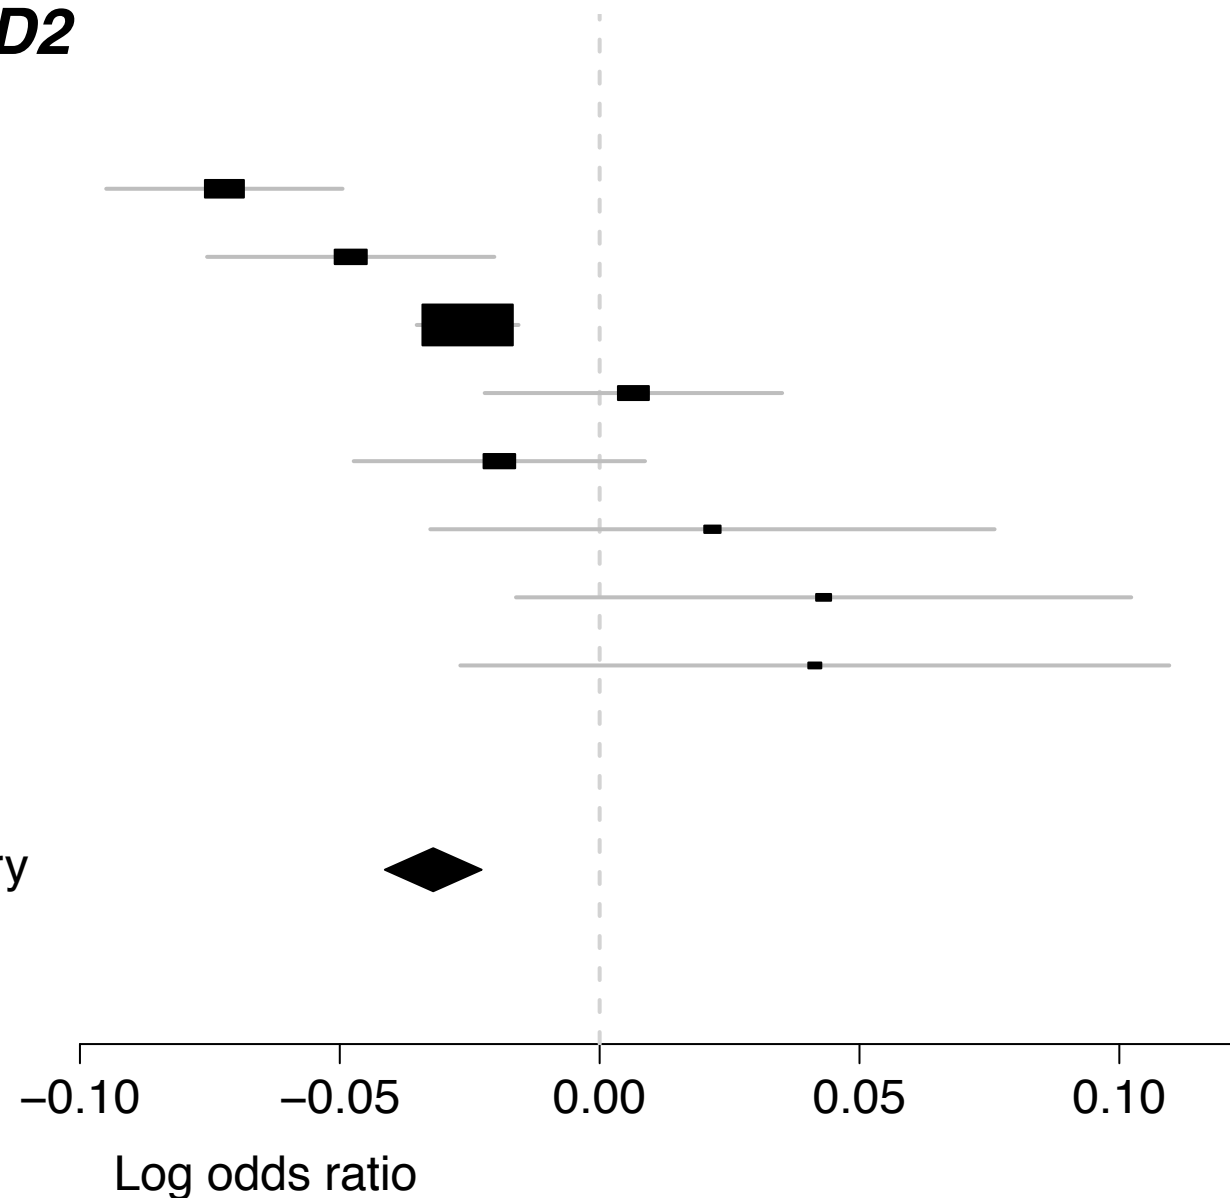

## PM-Plot

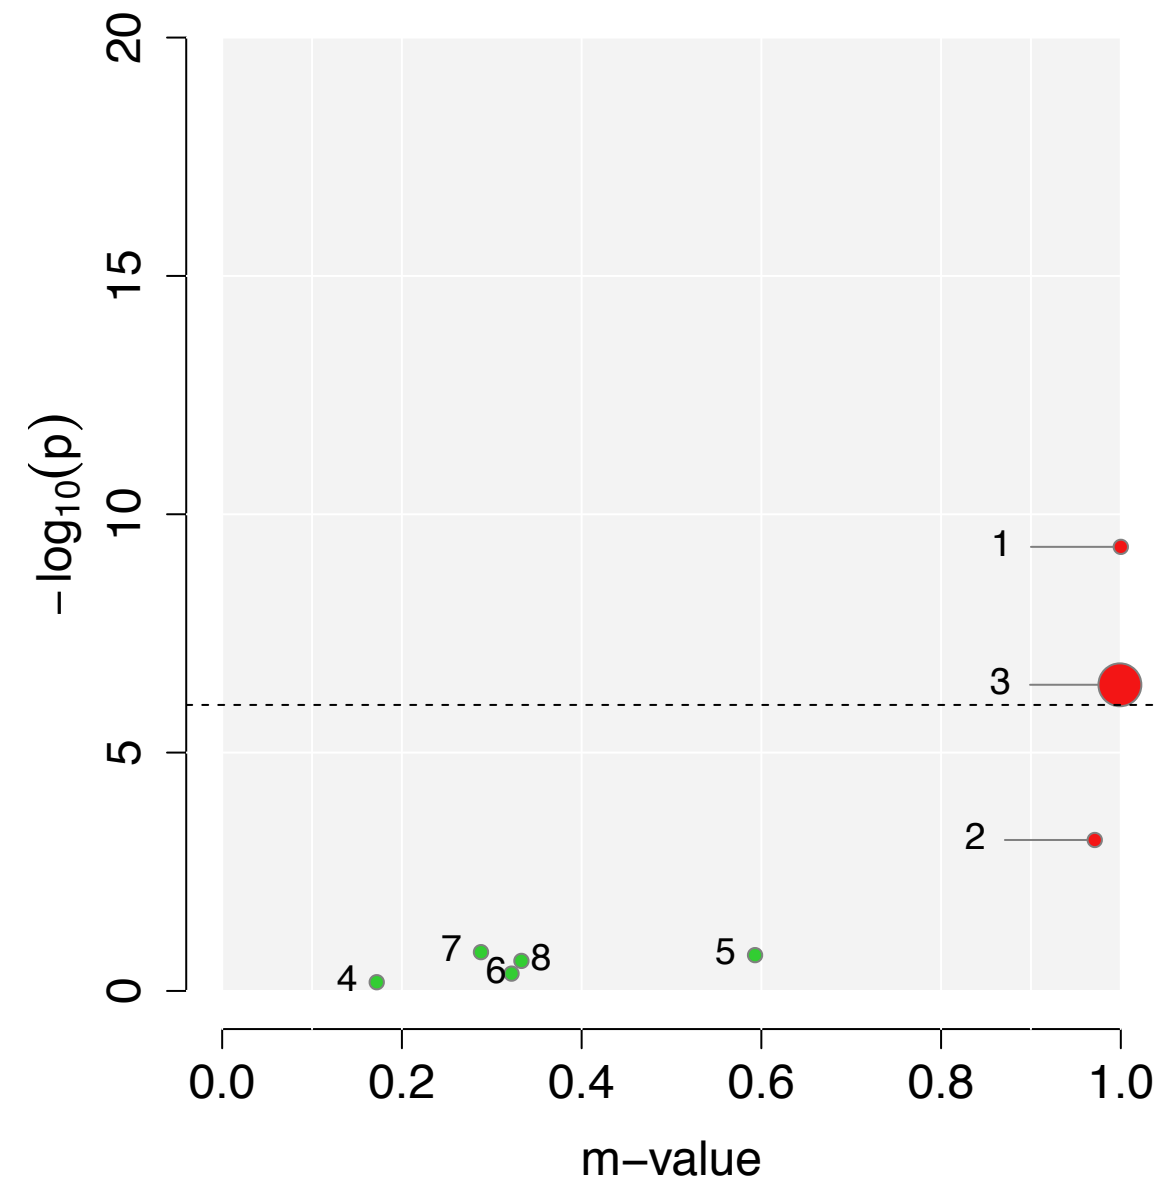

# rs2522831 (Meta $P = 2.01 \times 10^{-8}$ )

Gene : *PCLO*

## GWAS P-value

- 1.77 x 10<sup>-6</sup> ● 1.SCZ
- 0.0035 ● 2.BIP
- 1.33 x 10<sup>-5</sup> ● 3.MD
- 0.1316 ● 4.ASD
- 0.0078 ● 5.ADHD
- 0.8829 ● 6.TS
- 0.0290 ● 7.ANO
- 0.9455 ● 8.OCD

FE summary

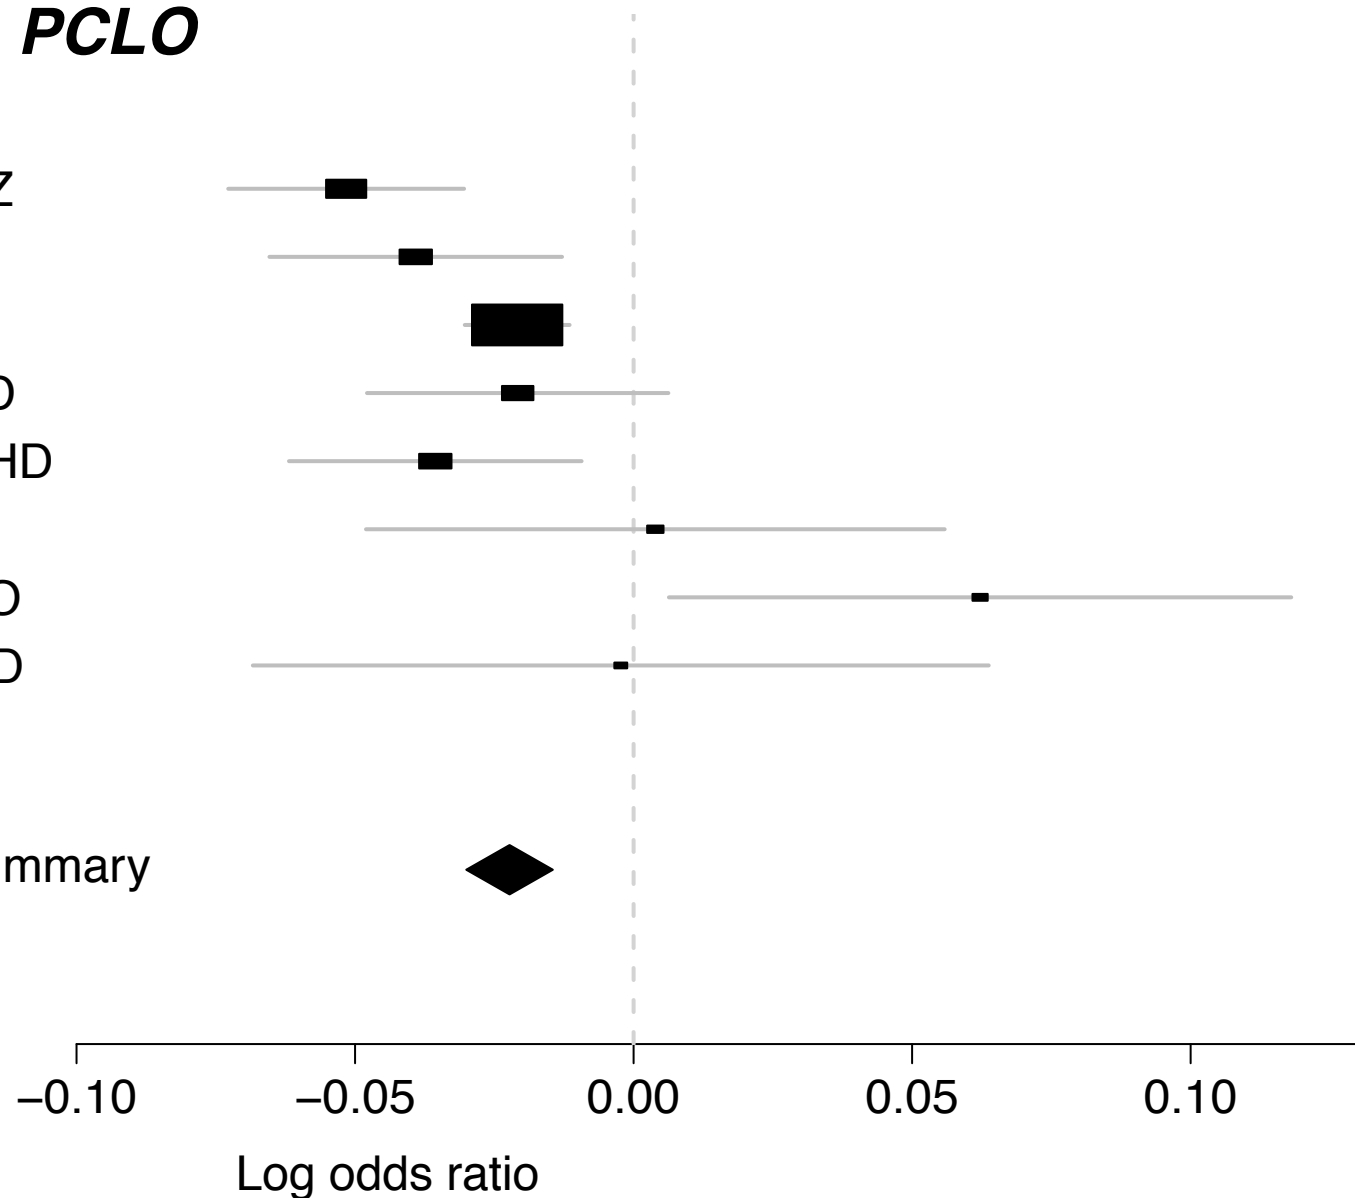

## PM-Plot

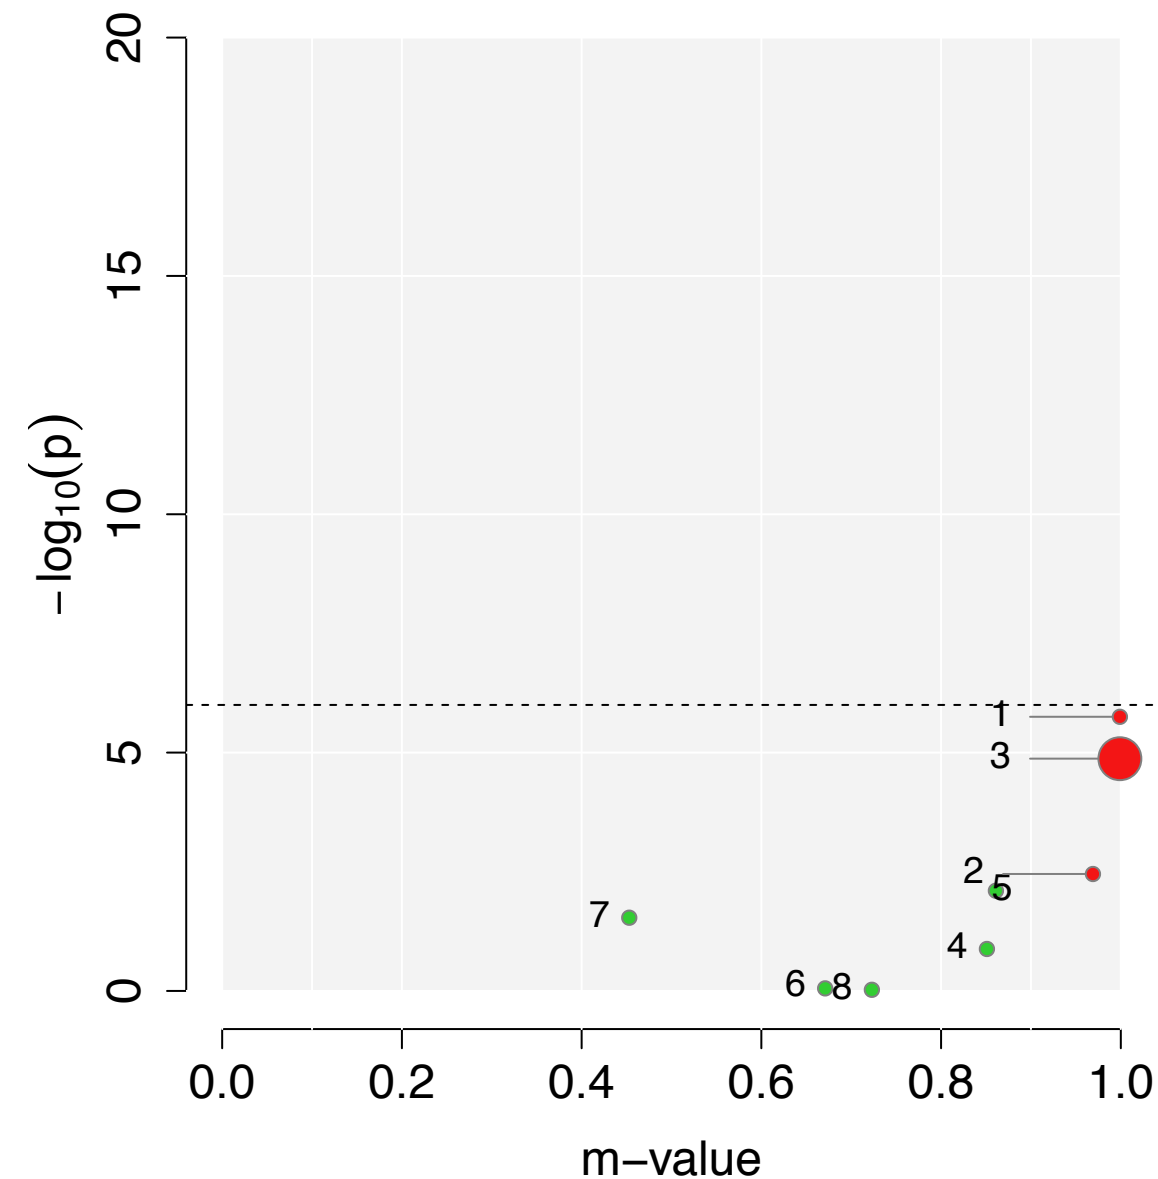

rs2693698 (Meta  $P = 3.04 \times 10^{-10}$ )

Gene : *BCL11B*

GWAS P-value

- 2.71 x 10<sup>-8</sup> ● 1.SCZ
- 1.65 x 10<sup>-5</sup> ● 2.BIP
- 0.0104 ● 3.MD
- 0.2079 ● 4.ASD
- 0.0606 ● 5.ADHD
- 0.0252 ● 6.TS
- 0.0299 ● 7.ANO
- 0.7599 ● 8.OCD

FE summary

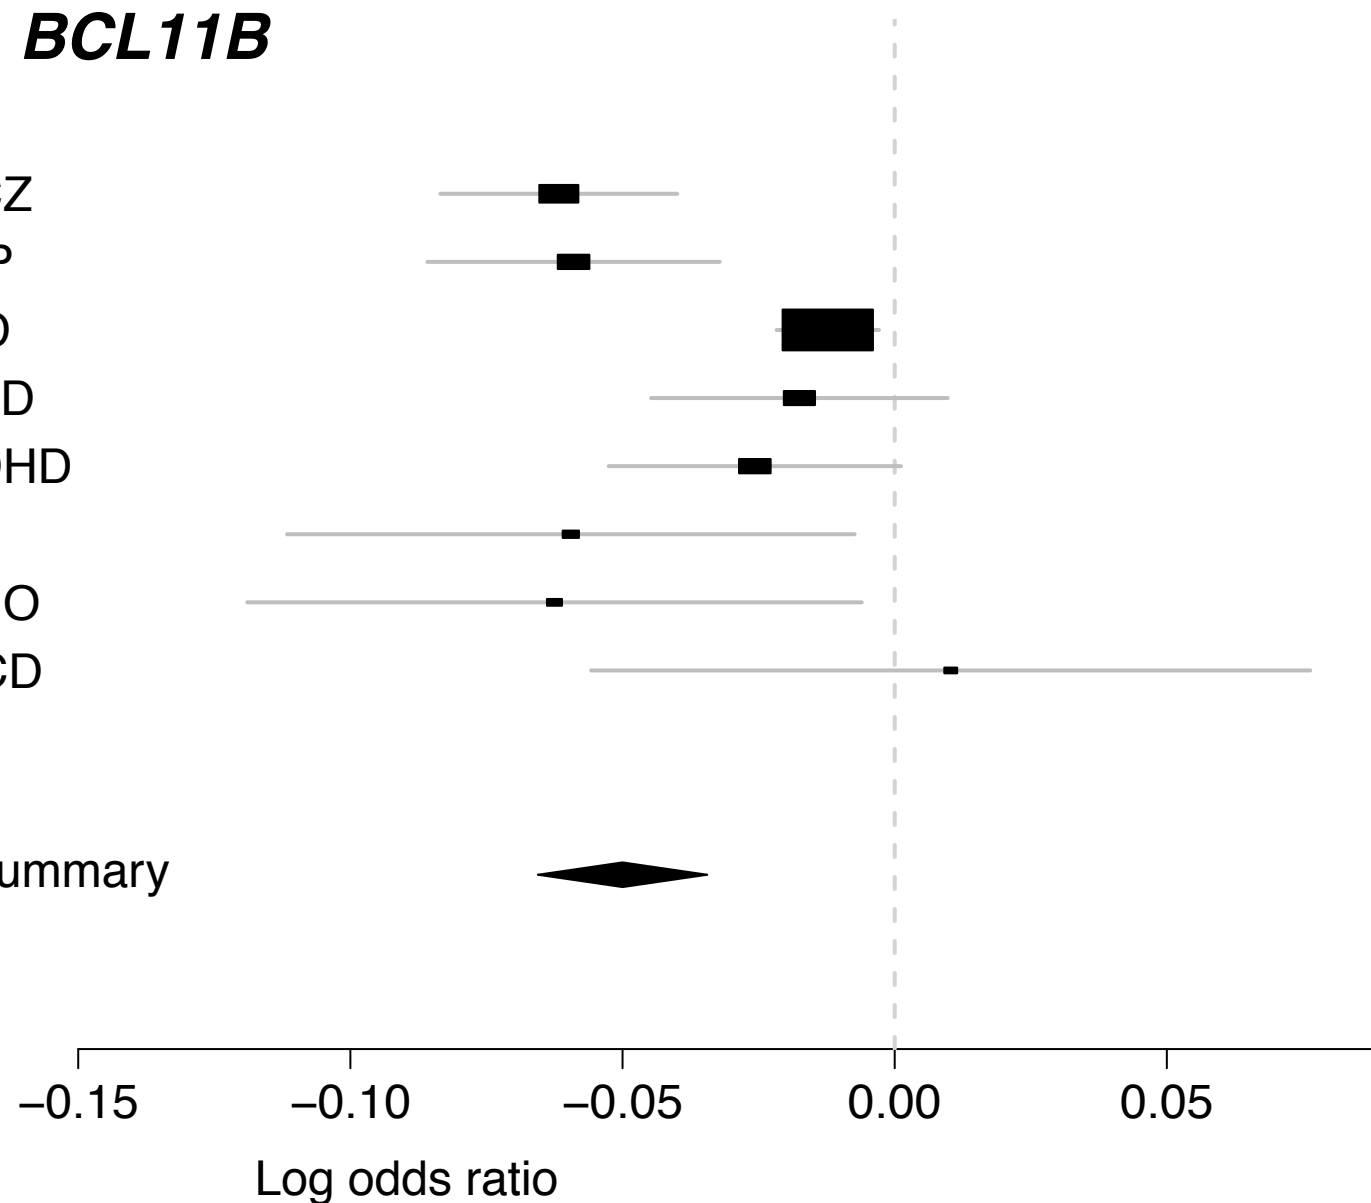

PM-Plot

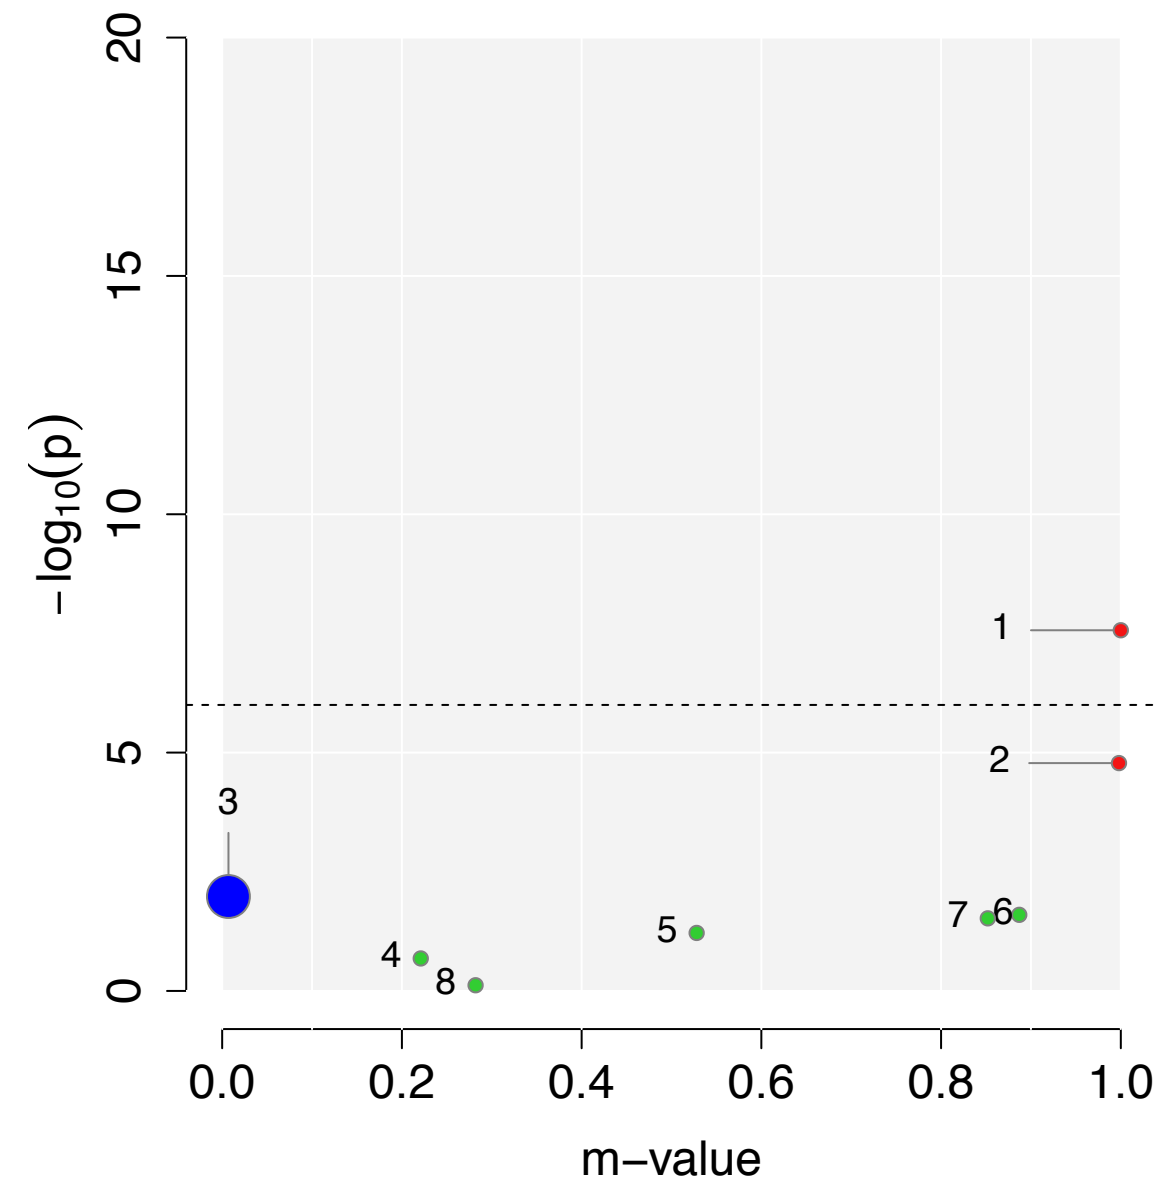

# rs2801578 (Meta $P = 2.75 \times 10^{-8}$ )

Gene : *PDE4B*

## GWAS P-value

- 8.59 x 10<sup>-8</sup> ● 1.SCZ
- 0.7586 ● 2.BIP
- 0.8224 ● 3.MD
- 0.2025 ● 4.ASD
- 0.0004 ● 5.ADHD
- 0.5265 ● 6.TS
- 0.1243 ● 7.ANO
- 0.0984 ● 8.OCD

FE summary

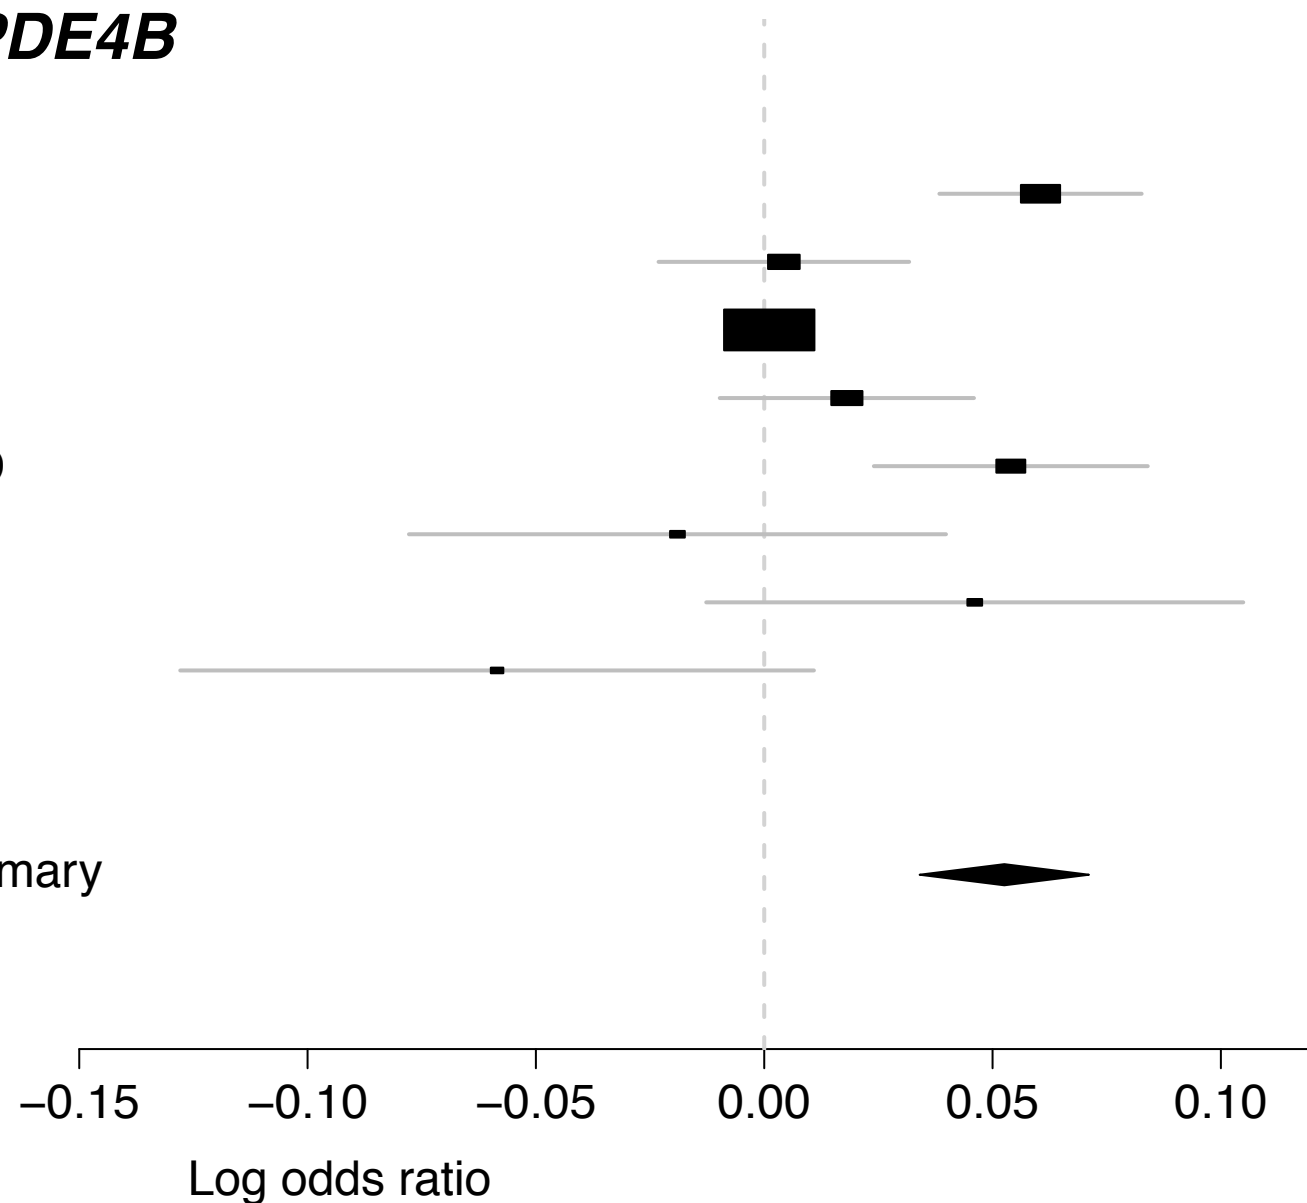

## PM-Plot

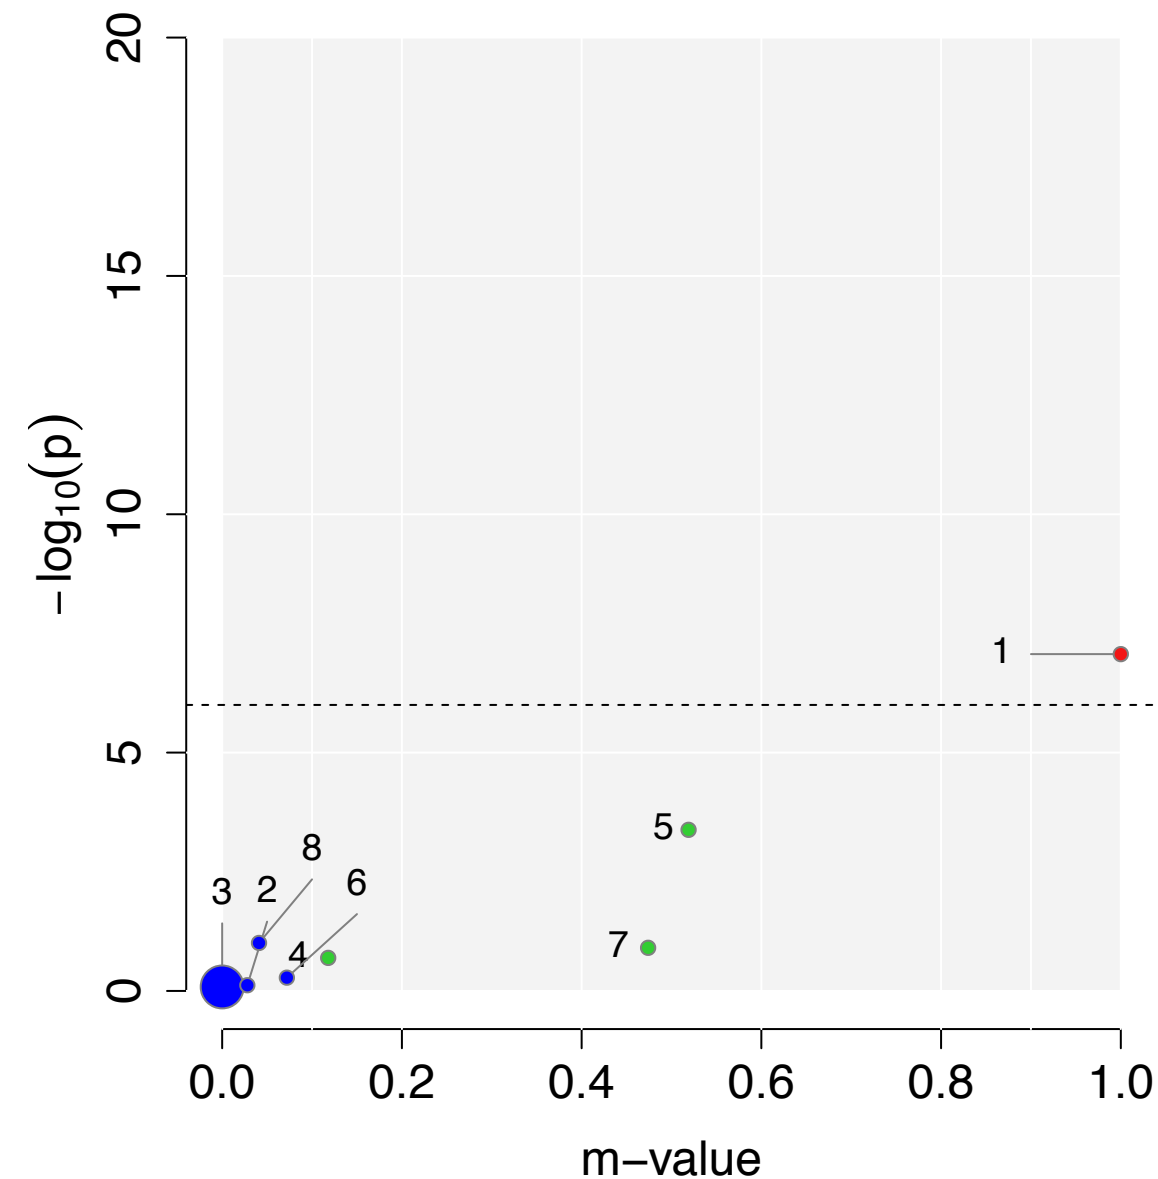



# rs2842198 (Meta $P = 9.7e \times 10^{-9}$ )

Gene : *HYI*, *SZT2*

## GWAS P-value

- 8.86 x 10<sup>-5</sup> ● 1.SCZ
- 0.2154 ● 2.BIP
- 0.8224 ● 3.MD
- 0.5449 ● 4.ASD
- 6.40 x 10<sup>-9</sup> ● 5.ADHD
- 0.6534 ● 6.TS
- 0.1259 ● 7.ANO
- 0.6439 ● 8.OCD

FE summary

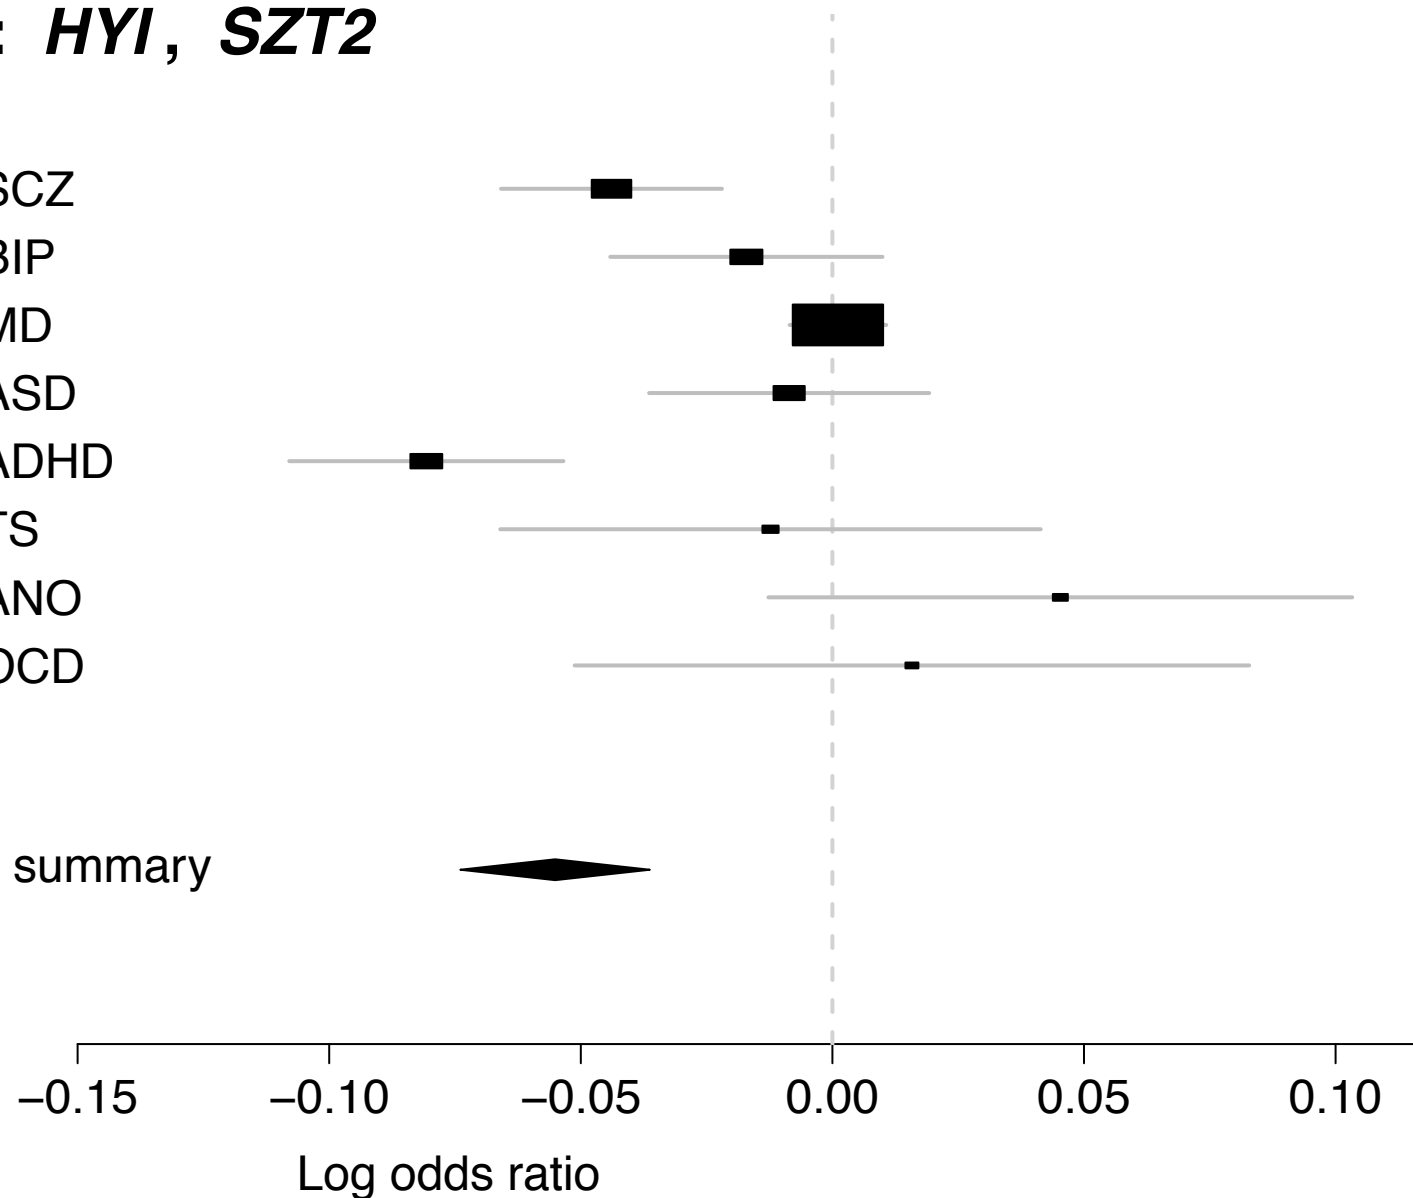

## PM-Plot

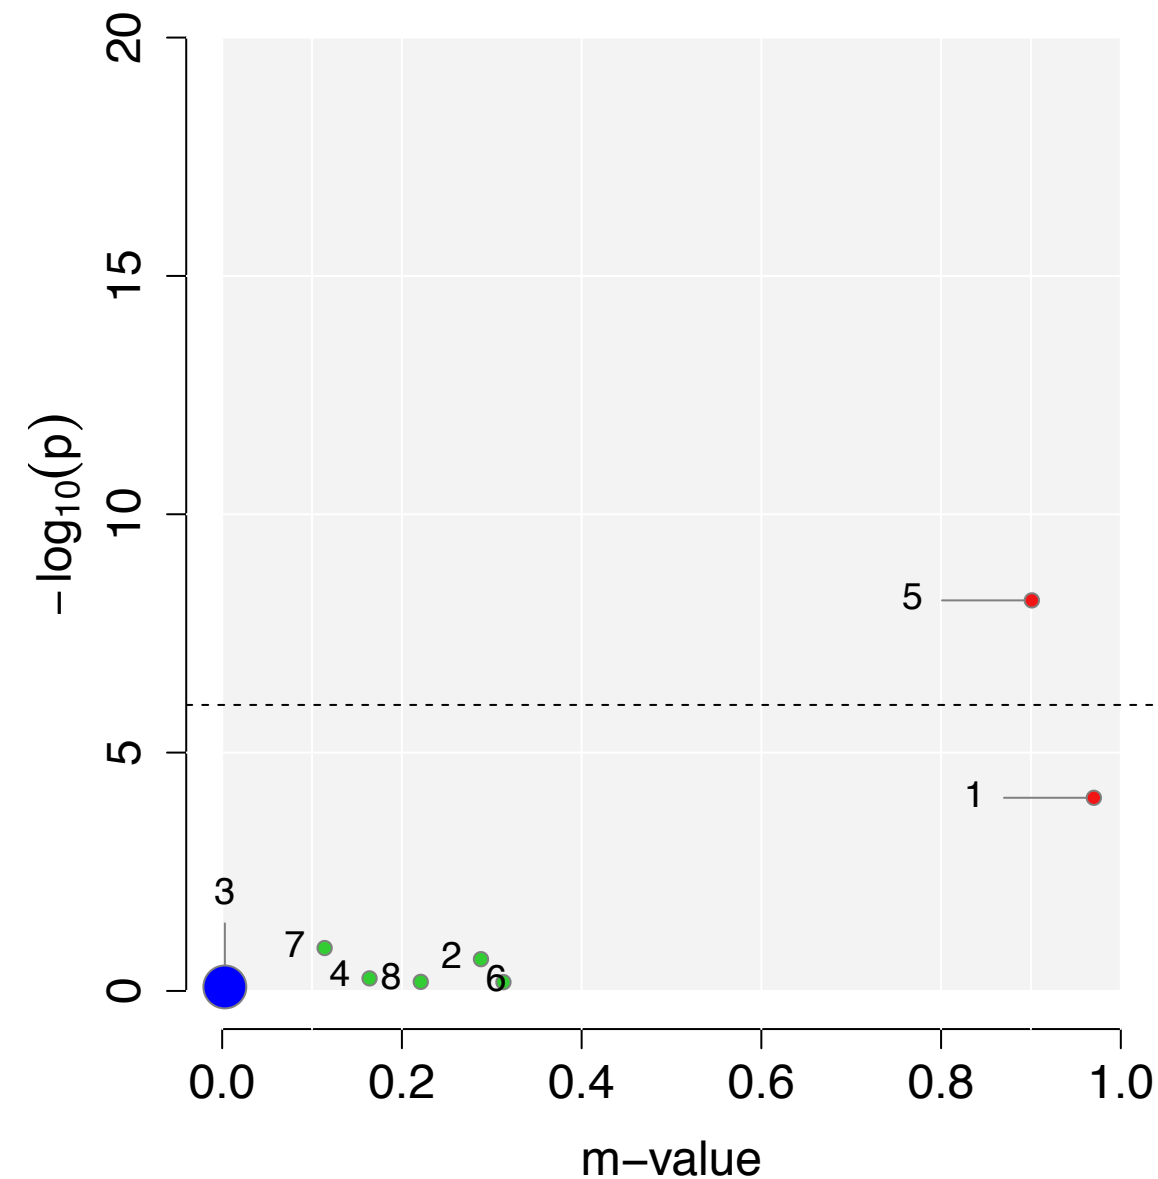

# rs2910032 (Meta $P = 4.38 \times 10^{-8}$ )

Gene : (>200kb)

## GWAS P-value

- 5.42 x 10<sup>-9</sup> ● 1.SCZ
- 0.0033 ● 2.BIP
- 0.6614 ● 3.MD
- 0.0217 ● 4.ASD
- 0.1316 ● 5.ADHD
- 0.7062 ● 6.TS
- 0.0633 ● 7.ANO
- 0.7381 ● 8.OCD

FE summary

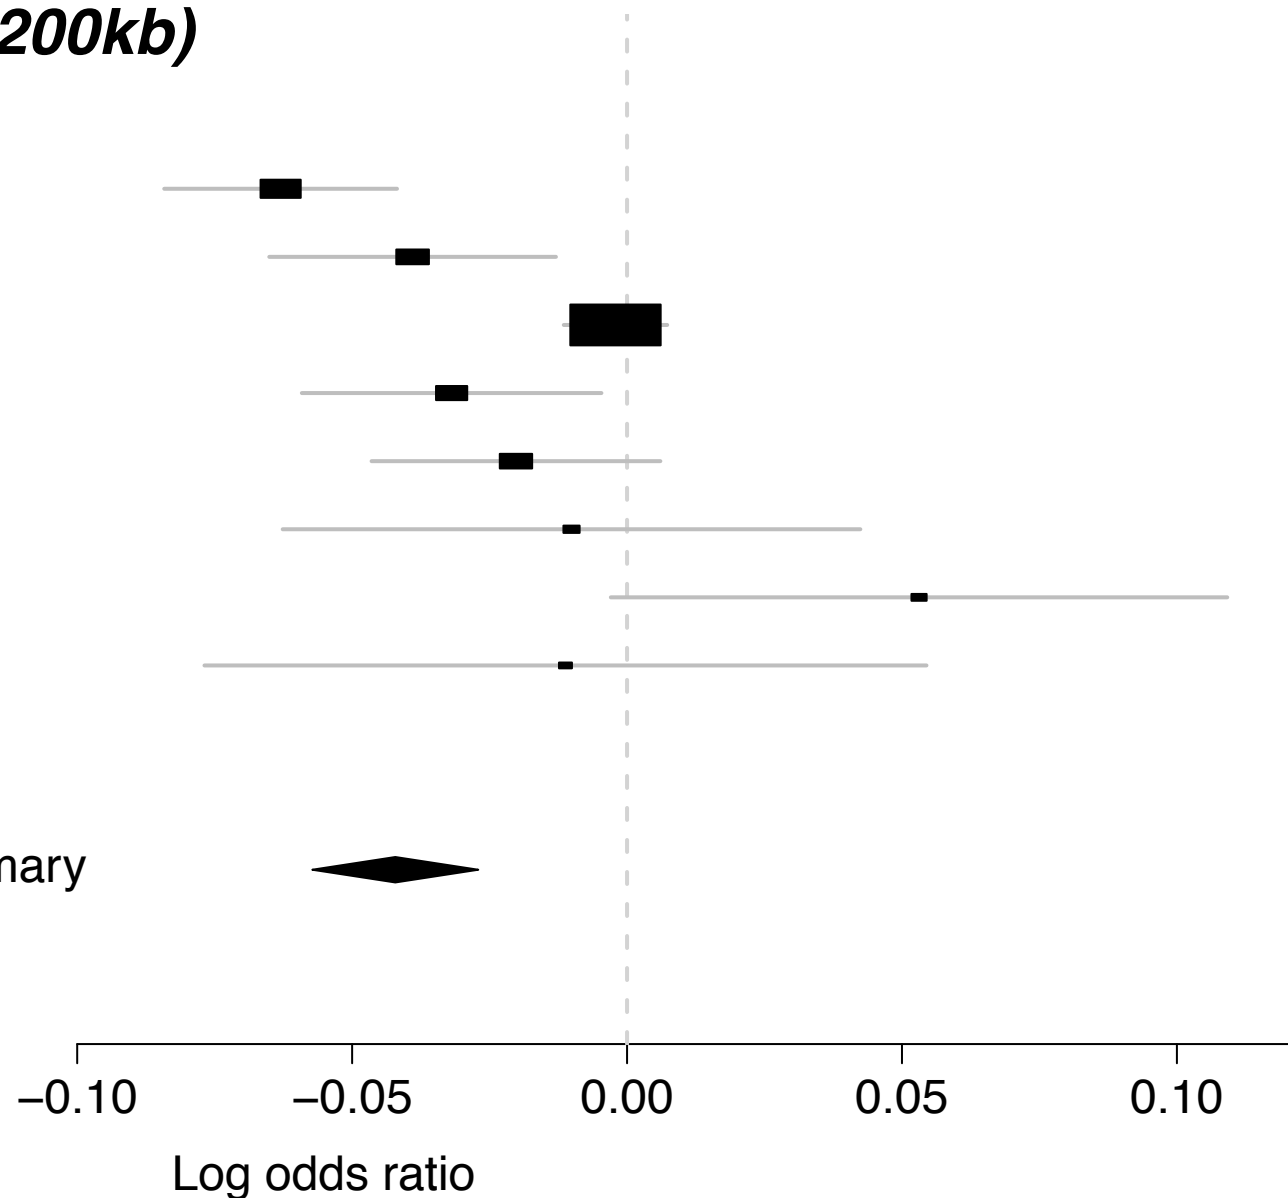

## PM-Plot

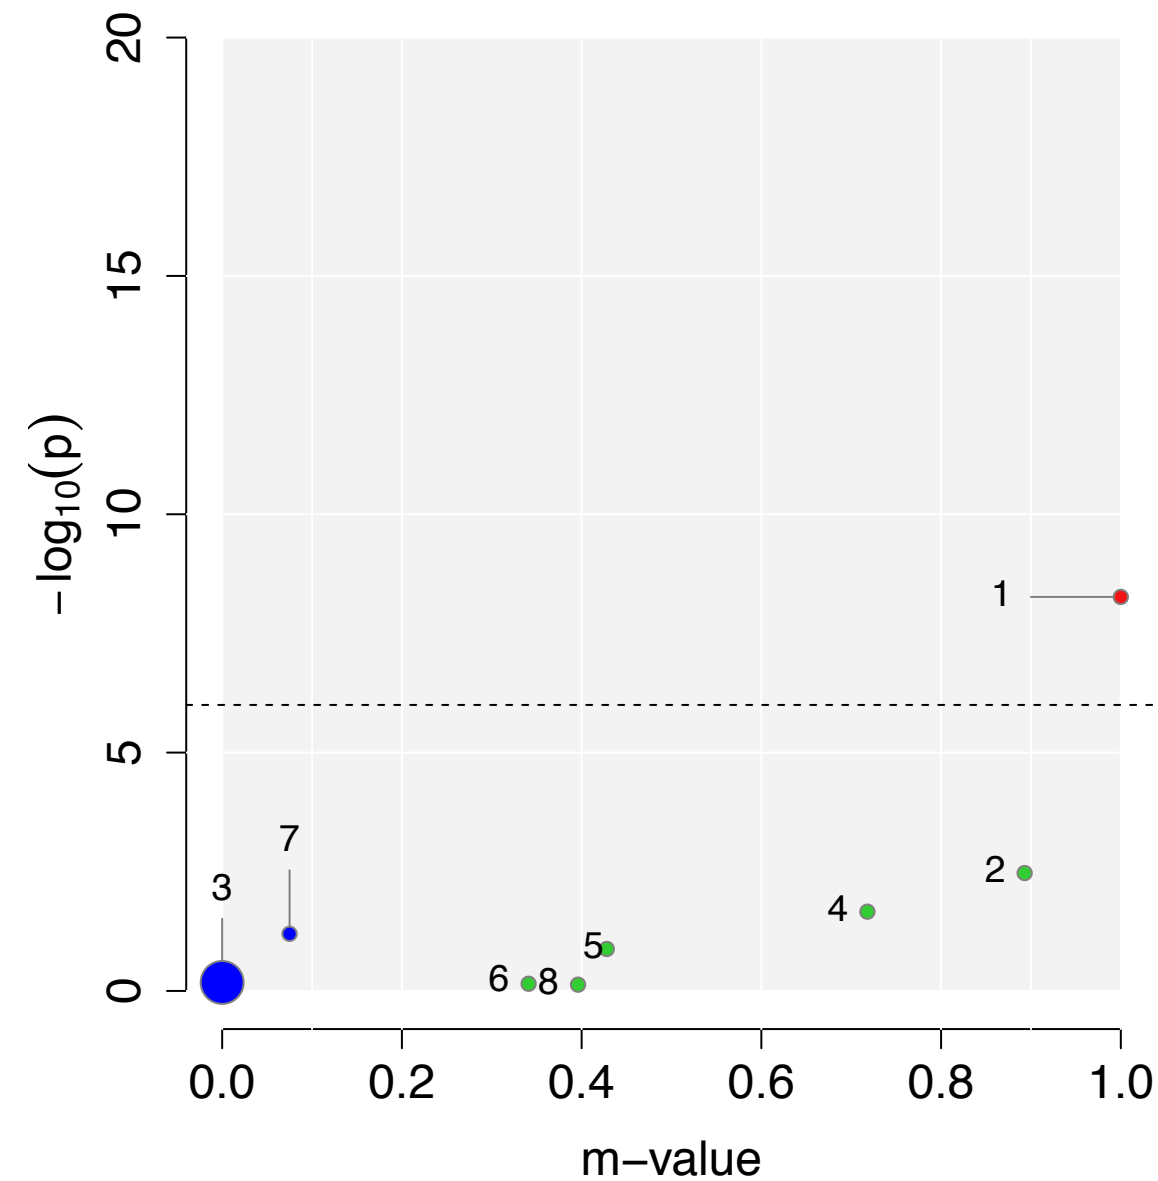

rs3001723 (Meta  $P = 7.44 \times 10^{-14}$ )

Gene : *PTPRF*, *KDM4A*

GWAS P-value

- 1.07 x 10<sup>-8</sup> ● 1.SCZ
- 0.0179 ● 2.BIP
- 0.0647 ● 3.MD
- 0.2985 ● 4.ASD
- 4.99 x 10<sup>-10</sup> ● 5.ADHD
- 0.3560 ● 6.TS
- 0.8160 ● 7.ANO
- 0.4442 ● 8.OCD

FE summary

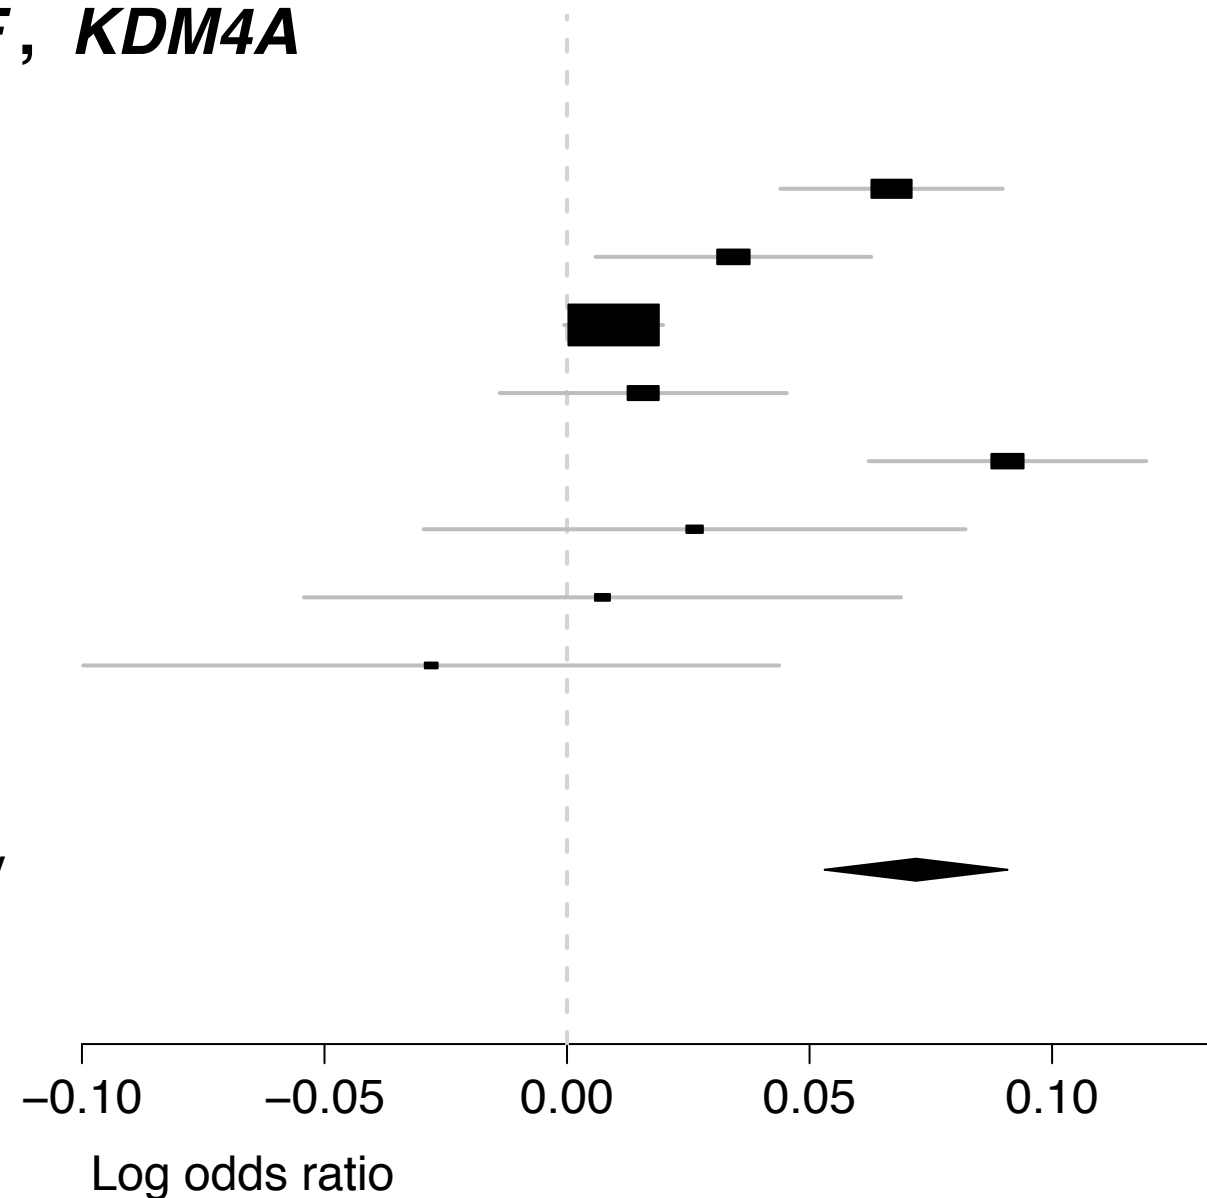

PM-Plot

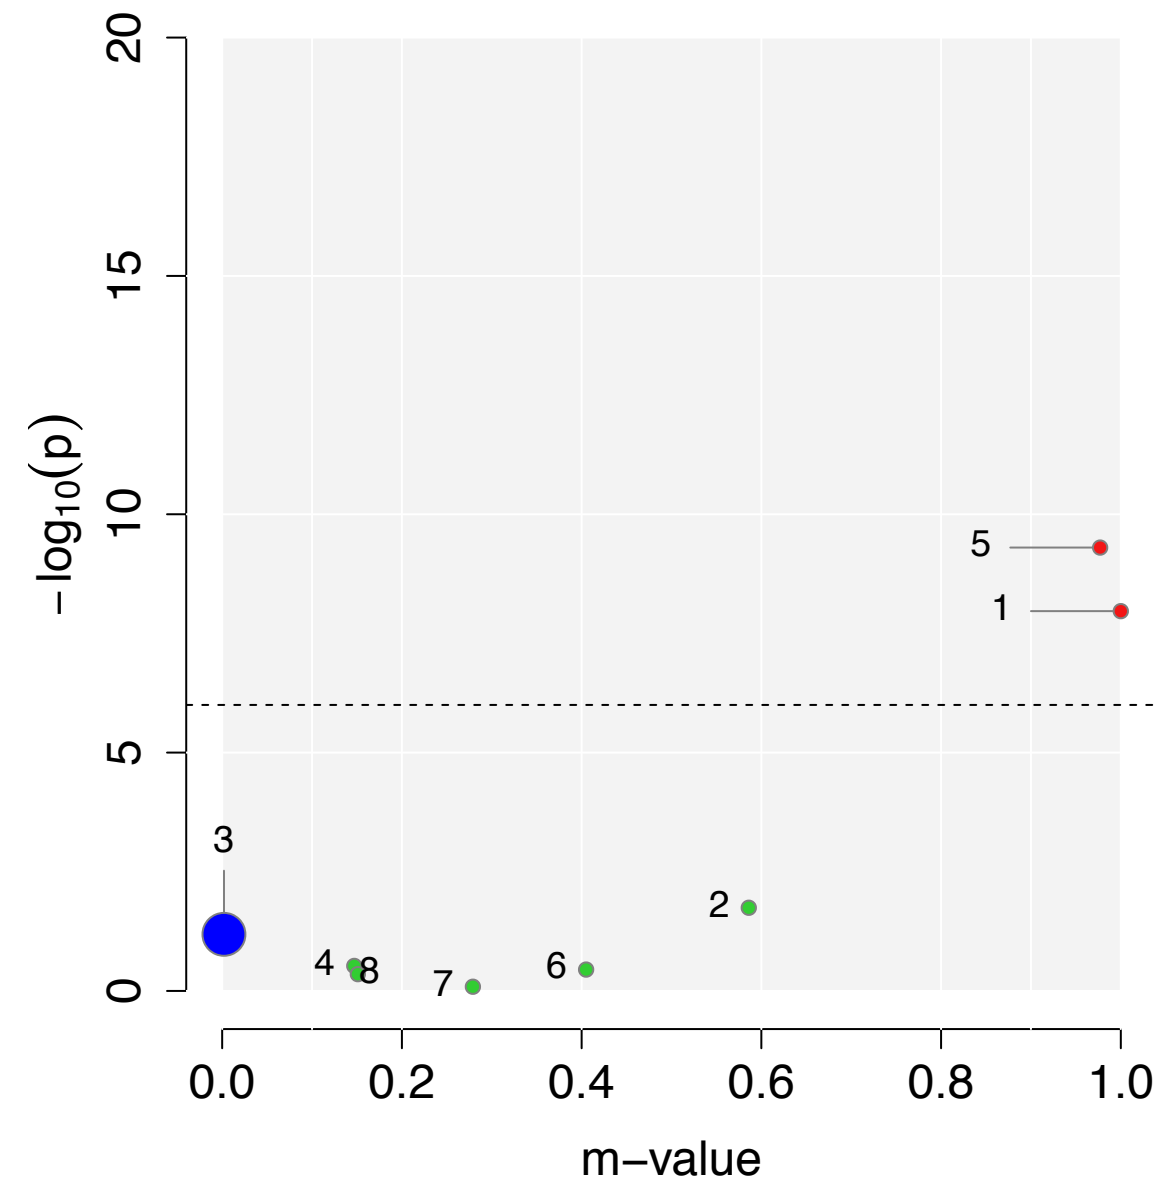

rs3798869 (Meta  $P = 7.69 \times 10^{-11}$ )

Gene : *SNAP91* , *PRSS35*

GWAS P-value

- 1.25 x 10<sup>-9</sup> ● 1.SCZ
- 1.04 x 10<sup>-5</sup> ● 2.BIP
- 0.0196 ● 3.MD
- 0.4202 ● 4.ASD
- 0.8587 ● 5.ADHD
- 0.2079 ● 6.TS
- 0.6280 ● 7.ANO
- 0.0335 ● 8.OCD

FE summary

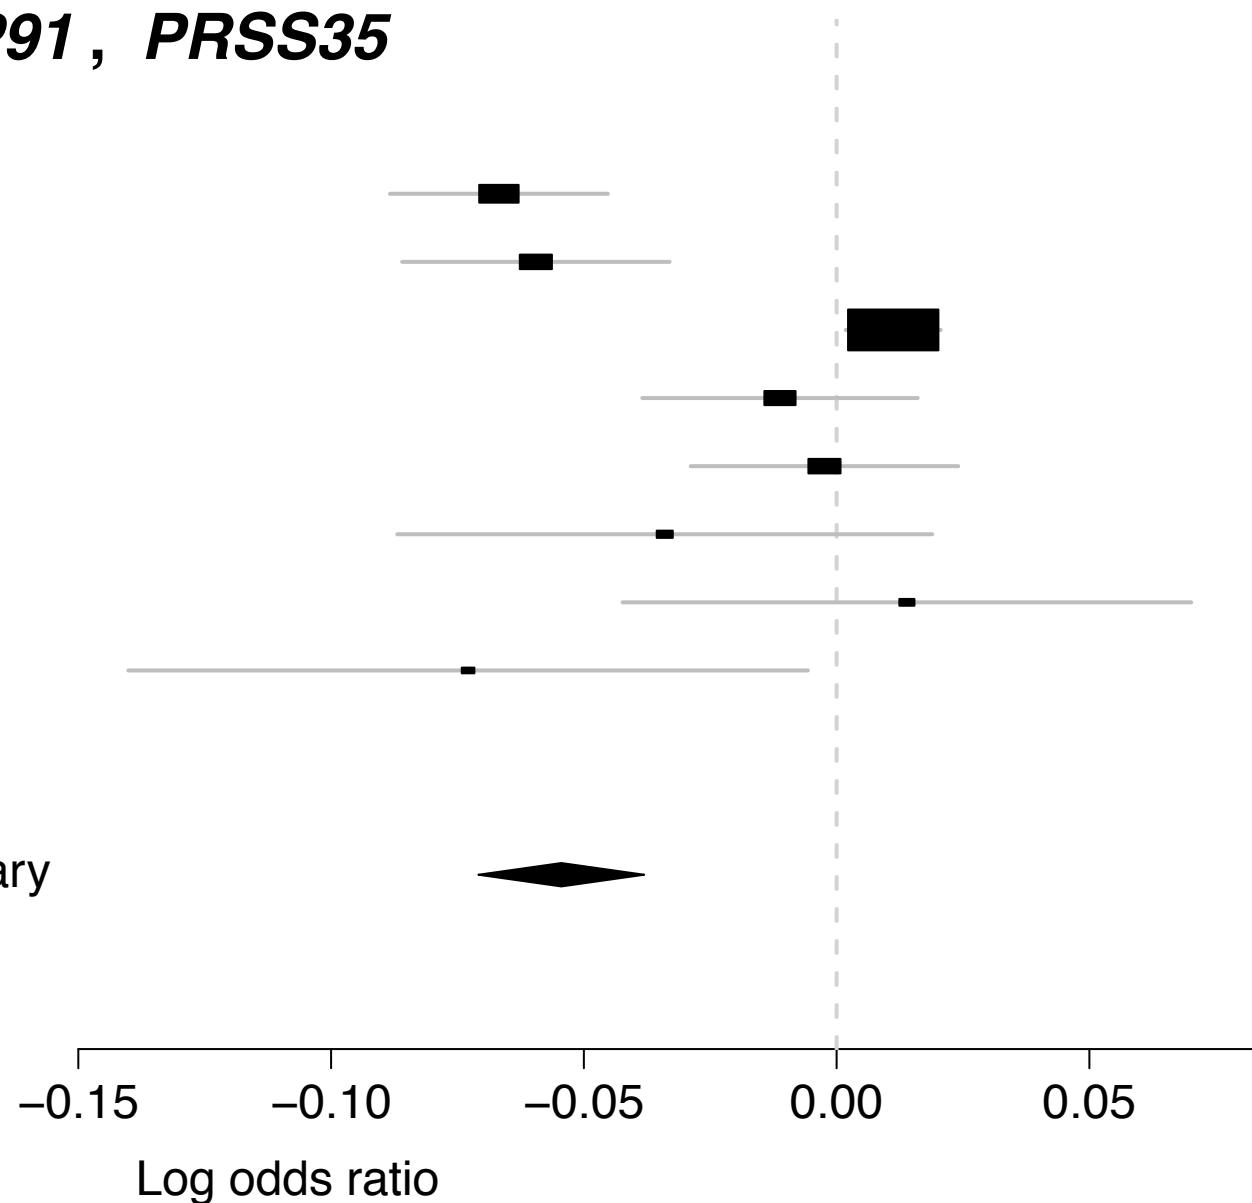

PM-Plot

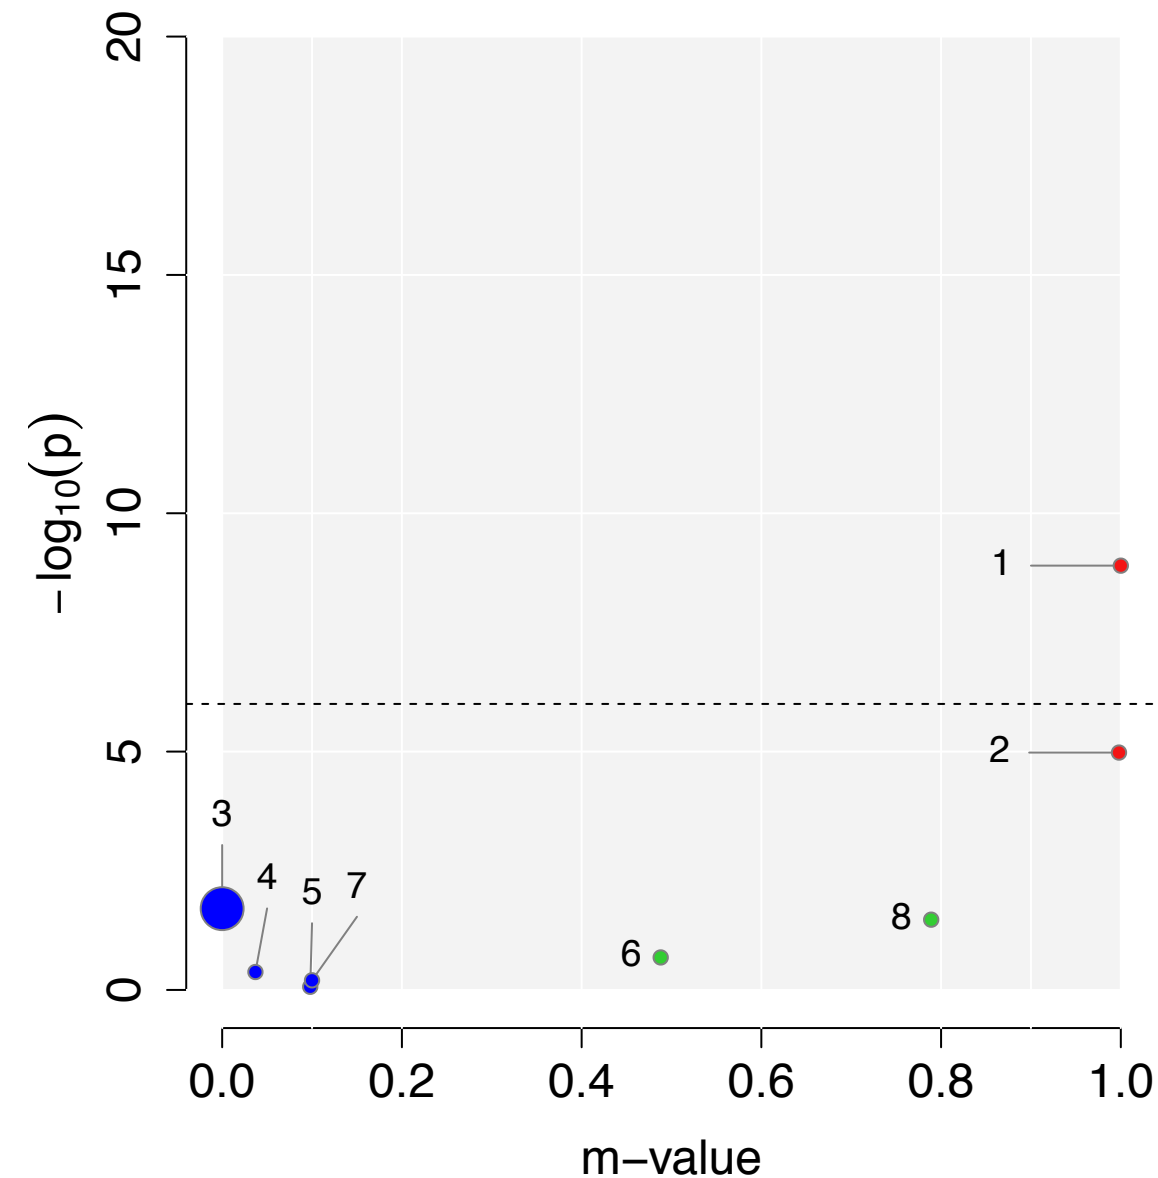

rs3812984 (Meta  $P = 2.96 \times 10^{-9}$ )

Gene : *PMFBP1*, *DHX38*

GWAS P-value

- 0.9268 ● 1.SCZ
- 0.0034 ● 2.BIP
- $6.07 \times 10^{-8}$  ● 3.MD
- 0.0003 ● 4.ASD
- 0.4321 ● 5.ADHD
- 0.6710 ● 6.TS
- 0.1377 ● 7.ANO
- 0.1194 ● 8.OCD

FE summary

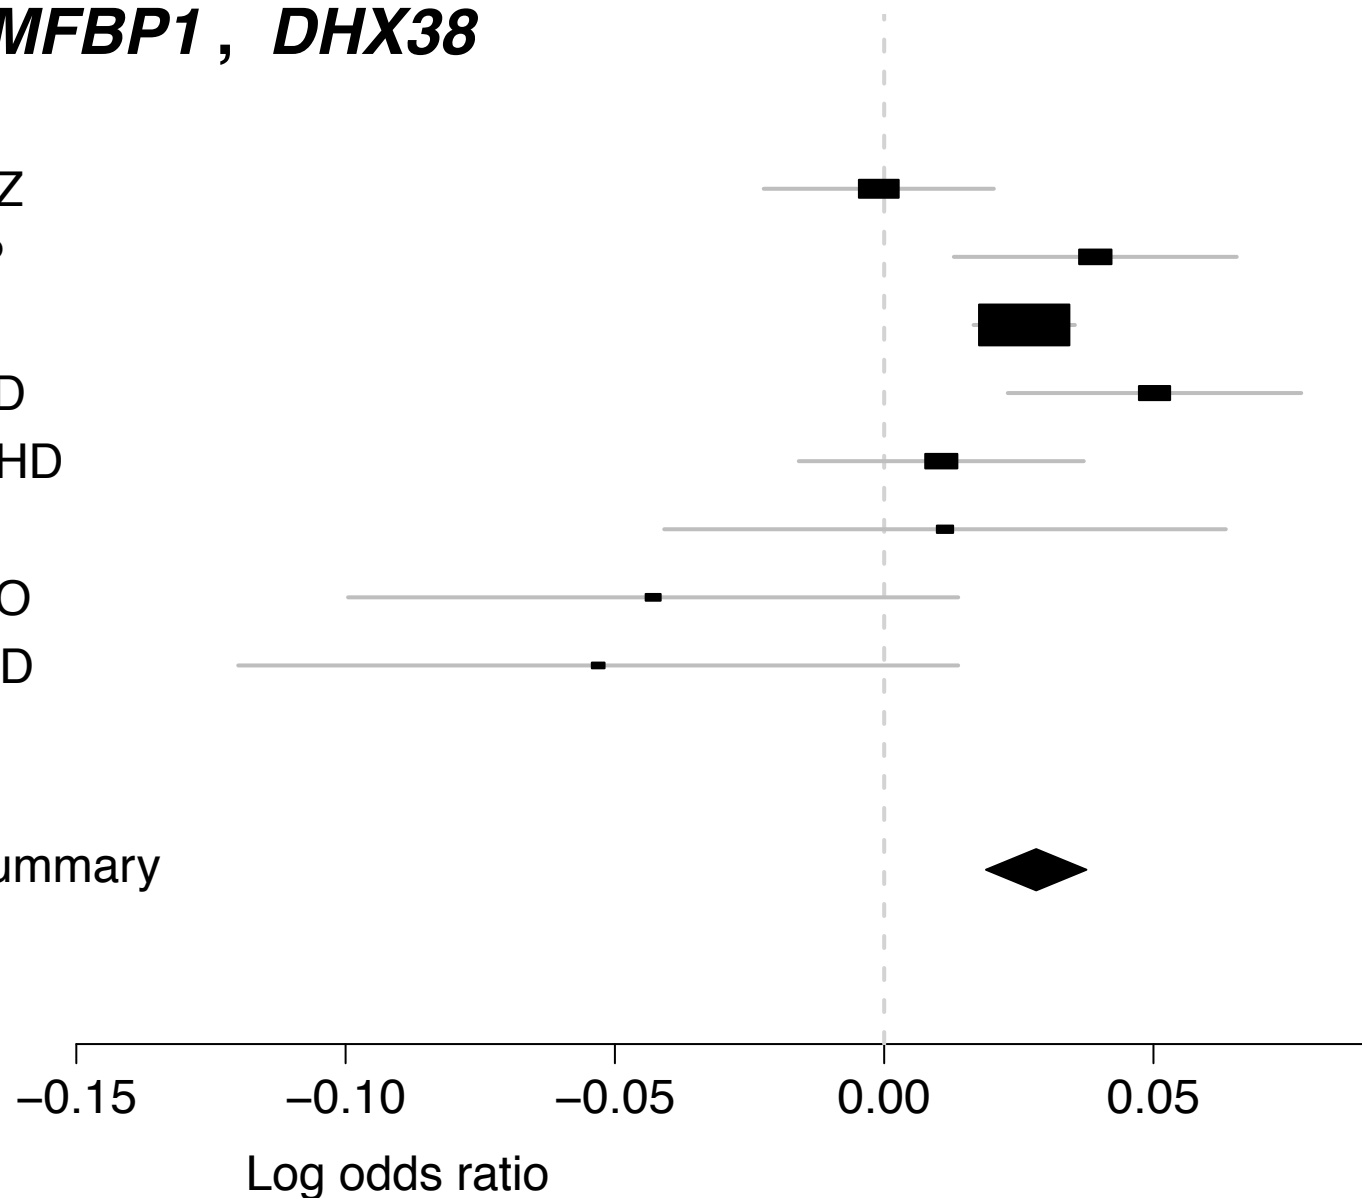

PM-Plot

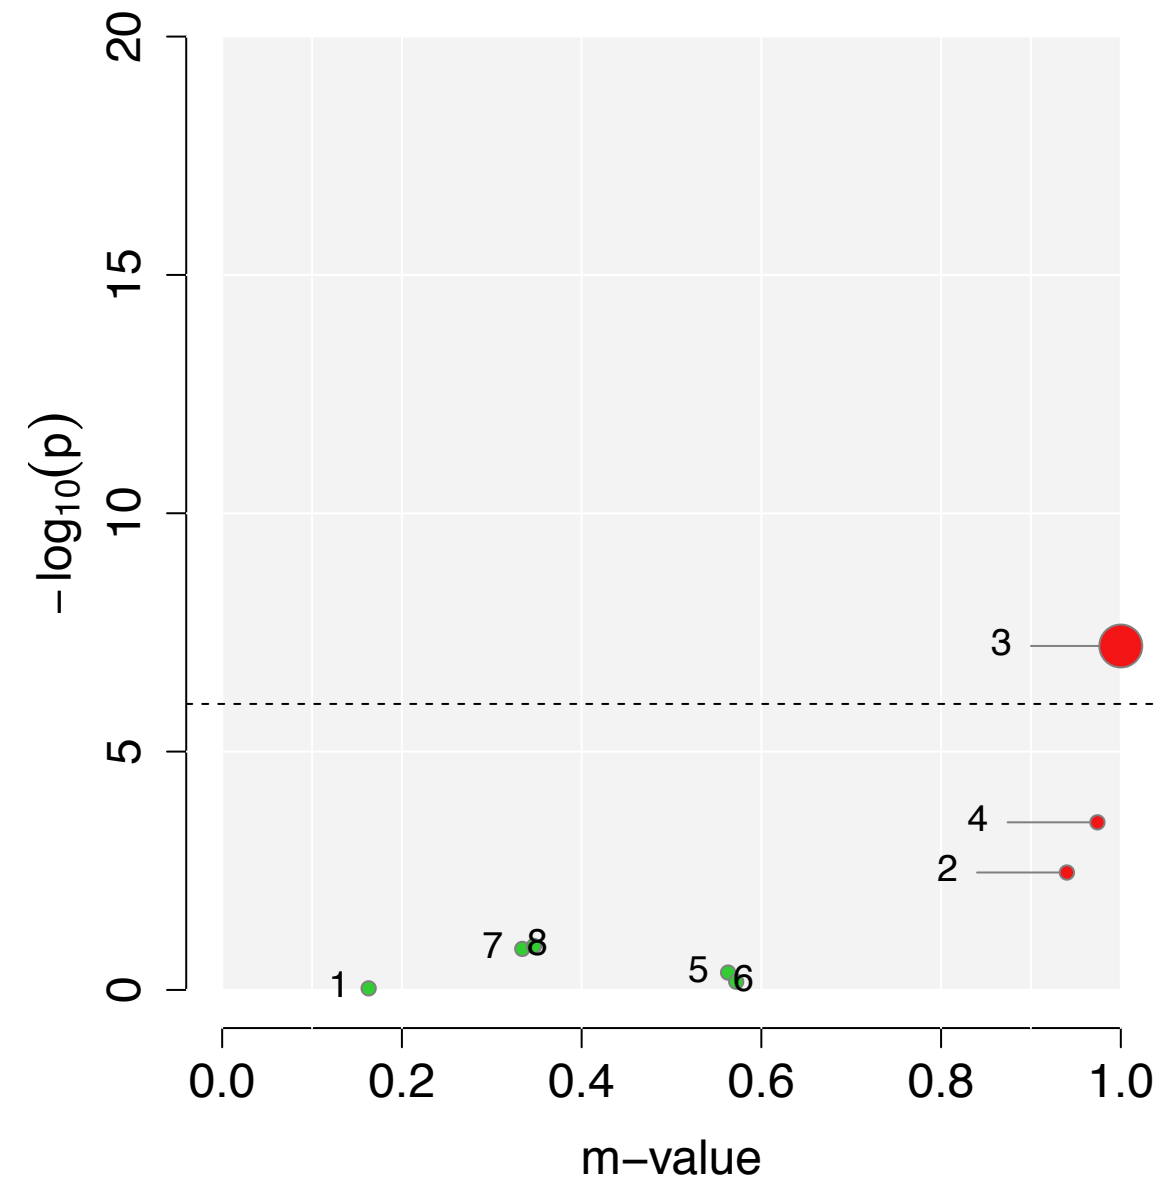

rs4129585 (Meta  $P = 2.47 \times 10^{-15}$ )

Gene : *TSNARE1*

GWAS P-value

- 3.45 x 10<sup>-13</sup> ● 1.SCZ
- 0.0061 ● 2.BIP
- 0.0055 ● 3.MD
- 0.5894 ● 4.ASD
- 0.3281 ● 5.ADHD
- 0.2877 ● 6.TS
- 0.0003 ● 7.ANO
- 0.0005 ● 8.OCD

FE summary

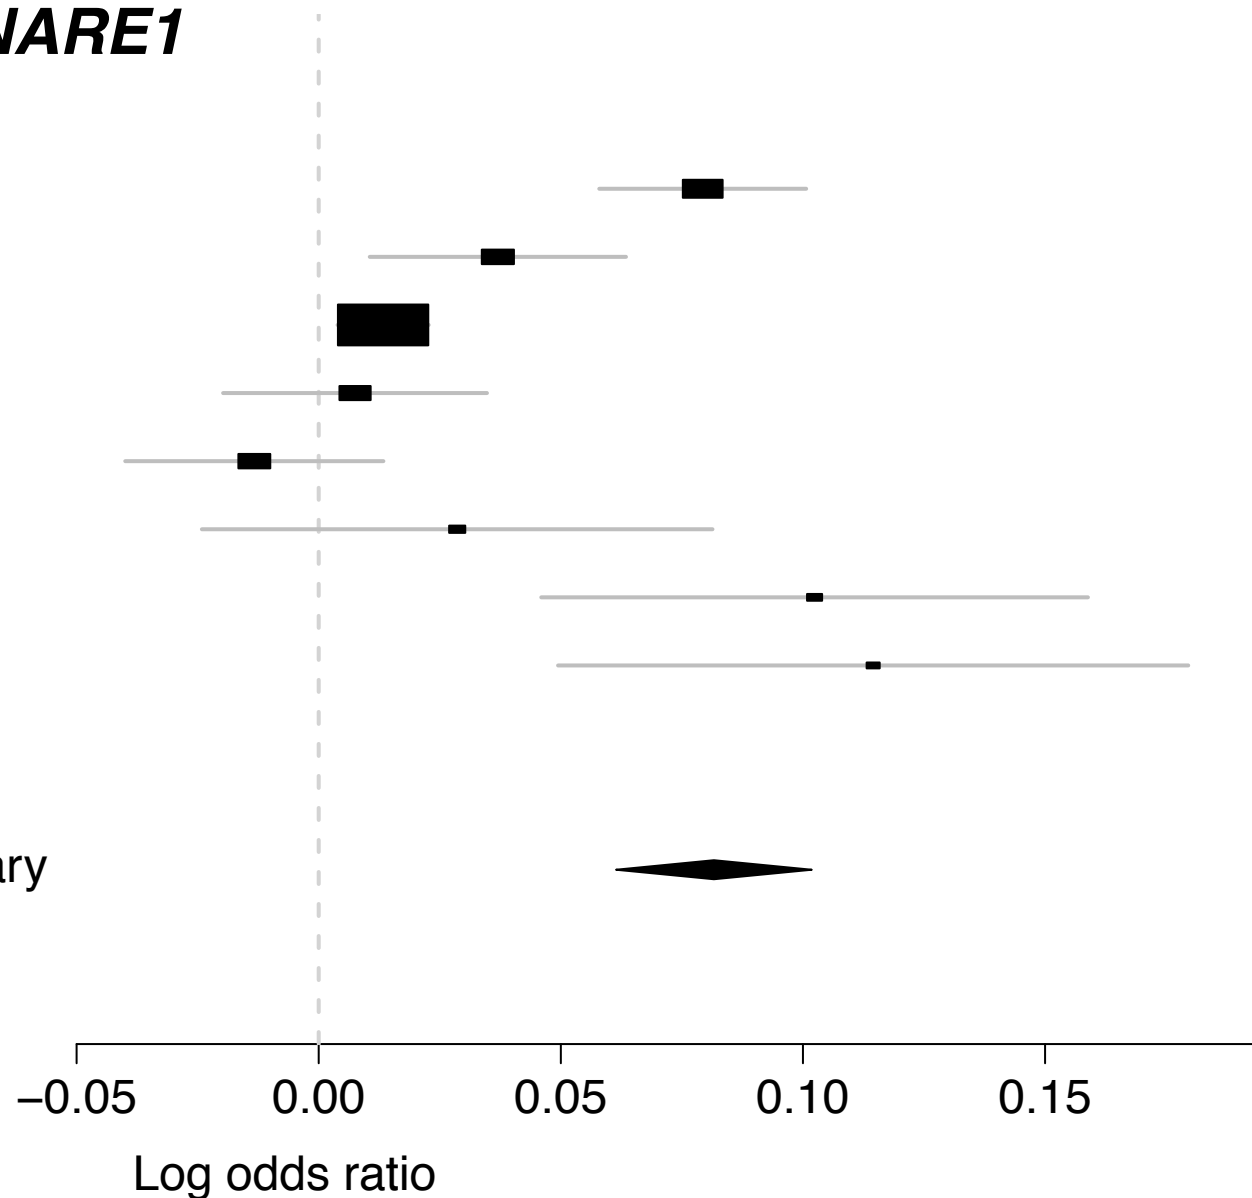

PM-Plot

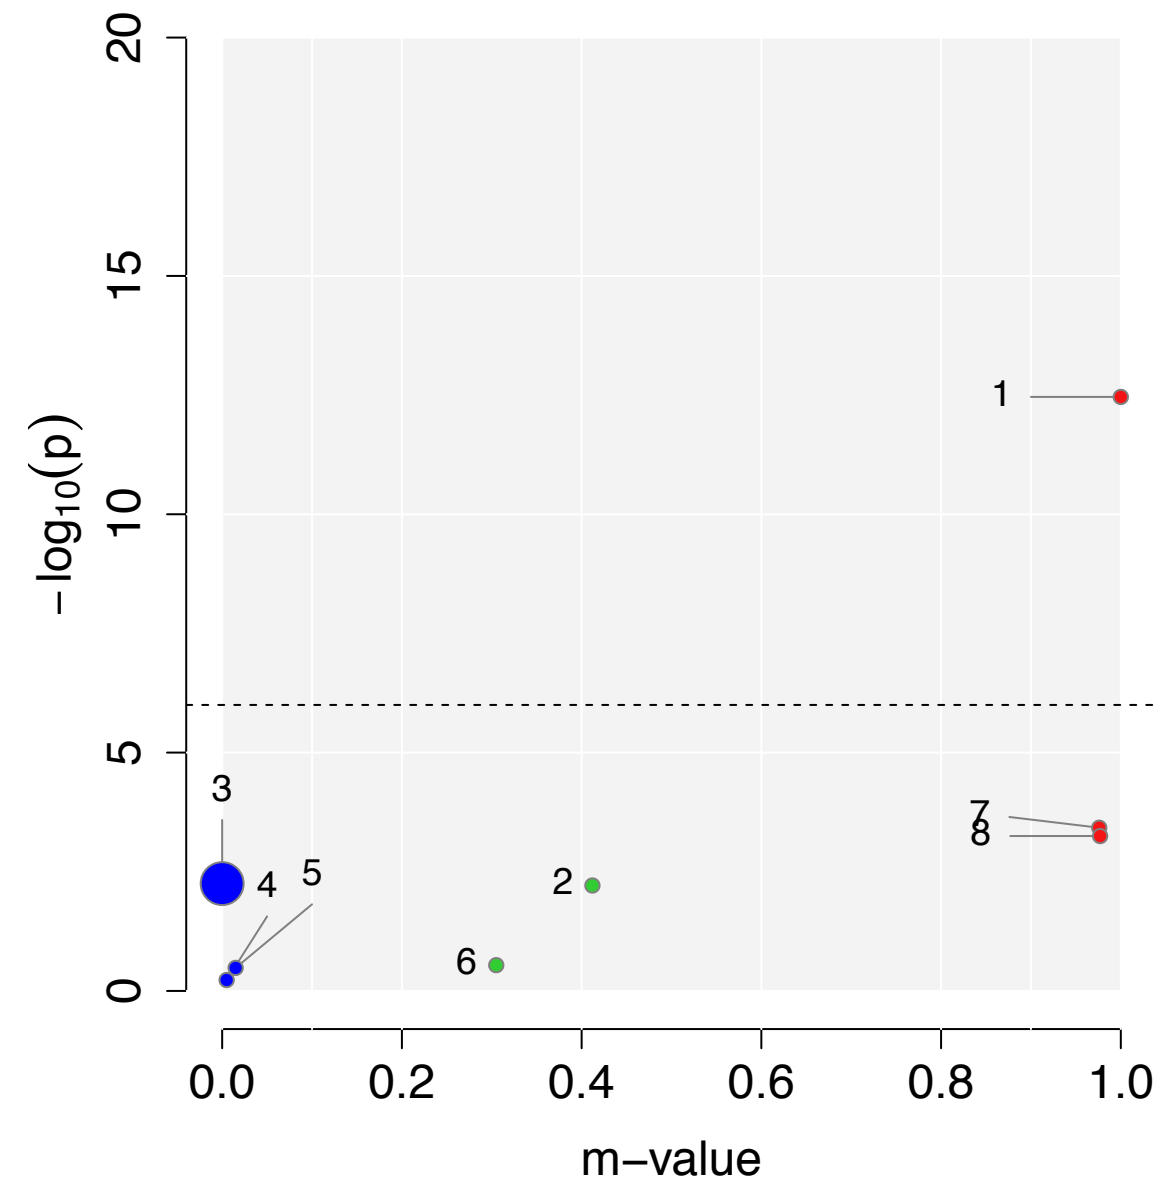

# rs4242470 (Meta $P = 2.65 \times 10^{-8}$ )

Gene : *PXDNL* , *PCMTD1*

## GWAS P-value

- 0.0061 ● 1.SCZ
- 0.0214 ● 2.BIP
- $1.34 \times 10^{-7}$  ● 3.MD
- 0.4732 ● 4.ASD
- 0.0840 ● 5.ADHD
- 0.1541 ● 6.TS
- 0.3503 ● 7.ANO
- 0.4505 ● 8.OCD

FE summary

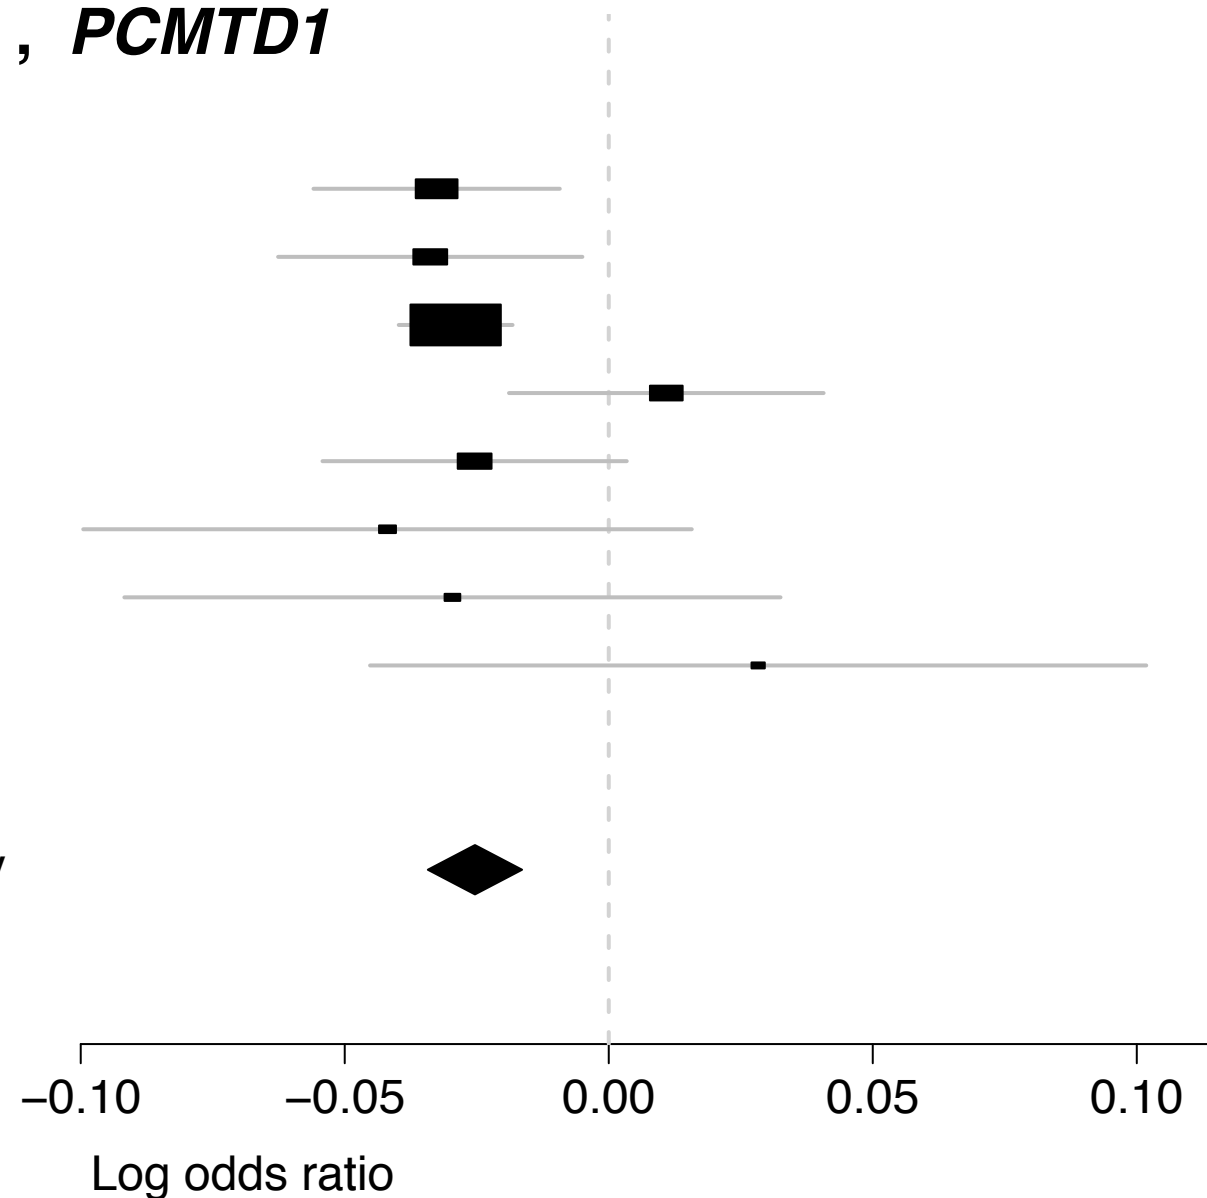

## PM-Plot

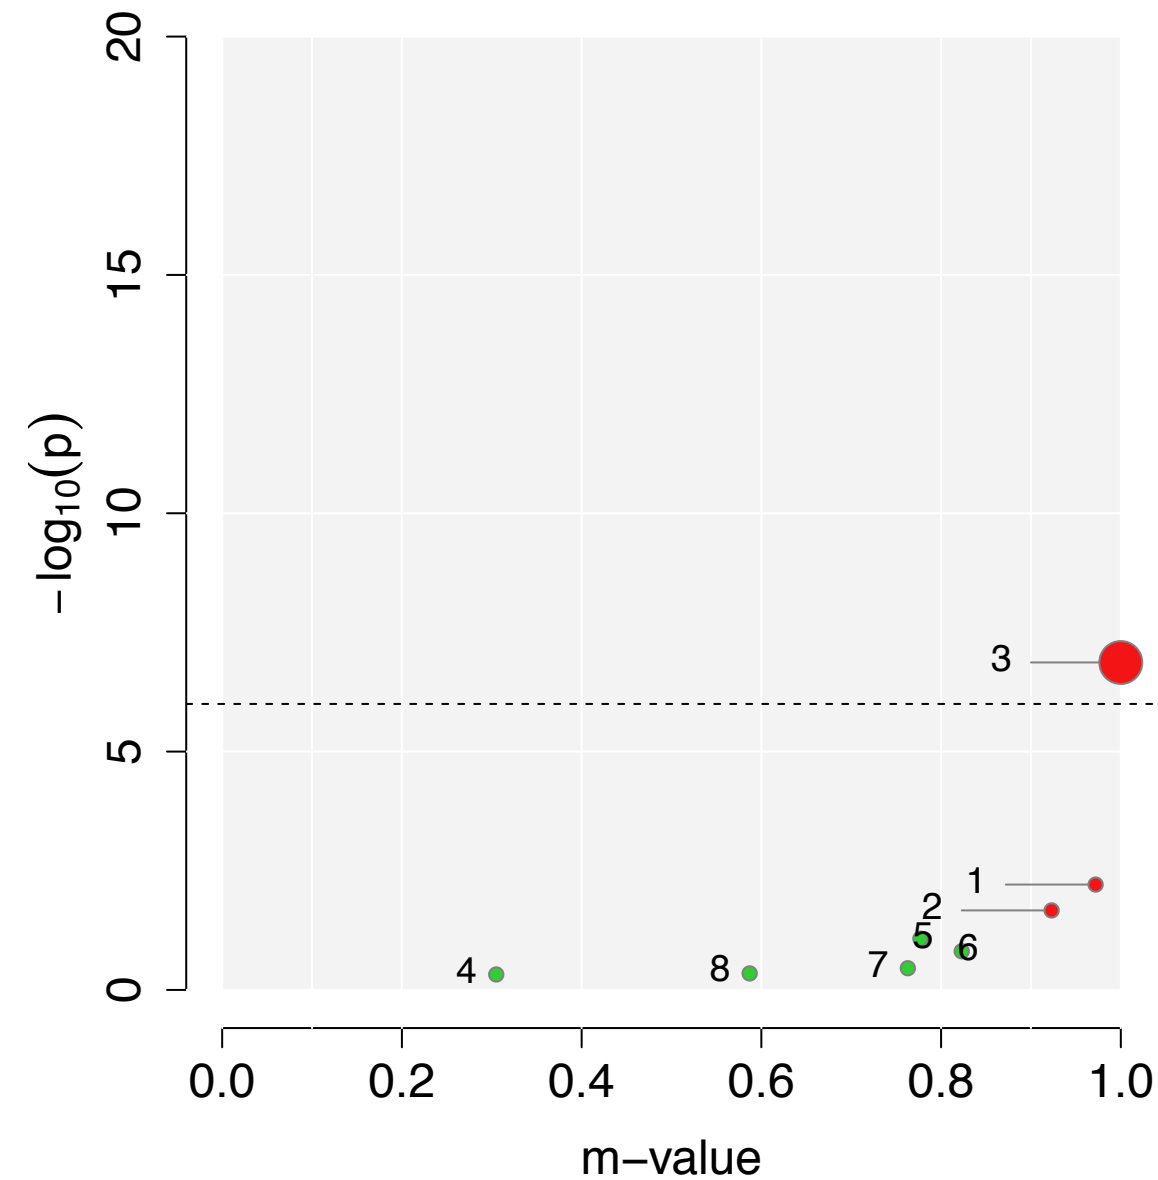



rs4244354 (Meta  $P = 2.27 \times 10^{-9}$ )

Gene : *ARL3*, *TRIM8*

GWAS P-value

- 1.74 x 10<sup>-9</sup> ● 1.SCZ
- 4.75 x 10<sup>-5</sup> ● 2.BIP
- 0.0061 ● 3.MD
- 0.1385 ● 4.ASD
- 0.6156 ● 5.ADHD
- 0.6056 ● 6.TS
- 0.4566 ● 7.ANO
- 0.8858 ● 8.OCD

FE summary

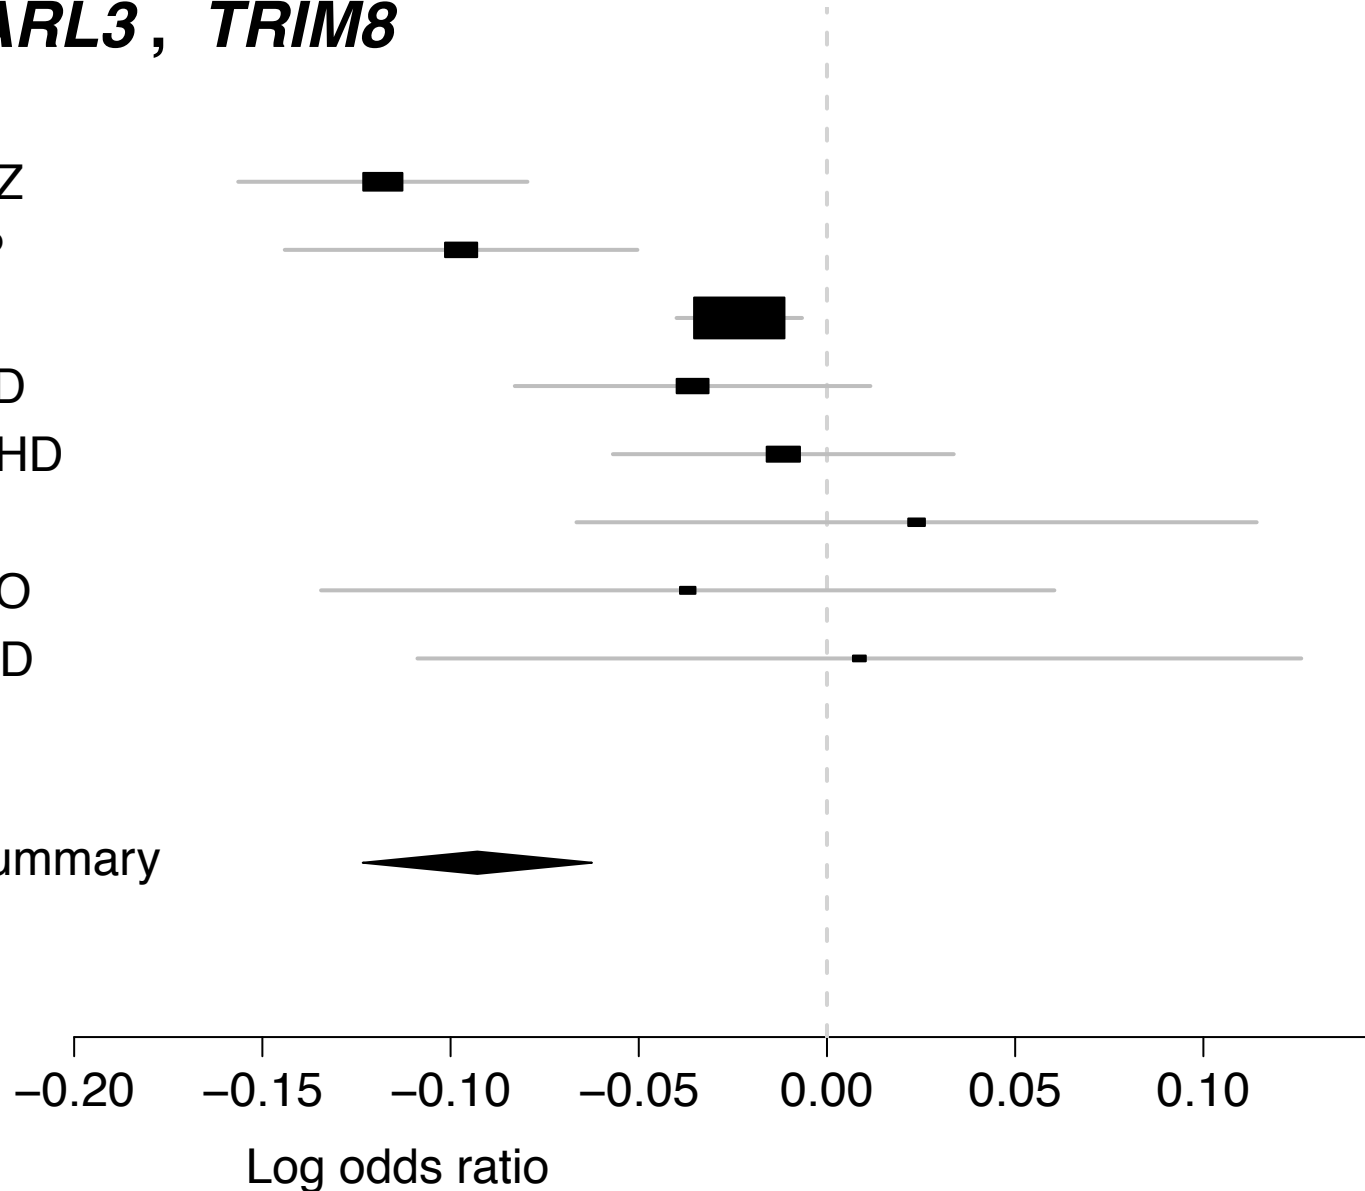

PM-Plot

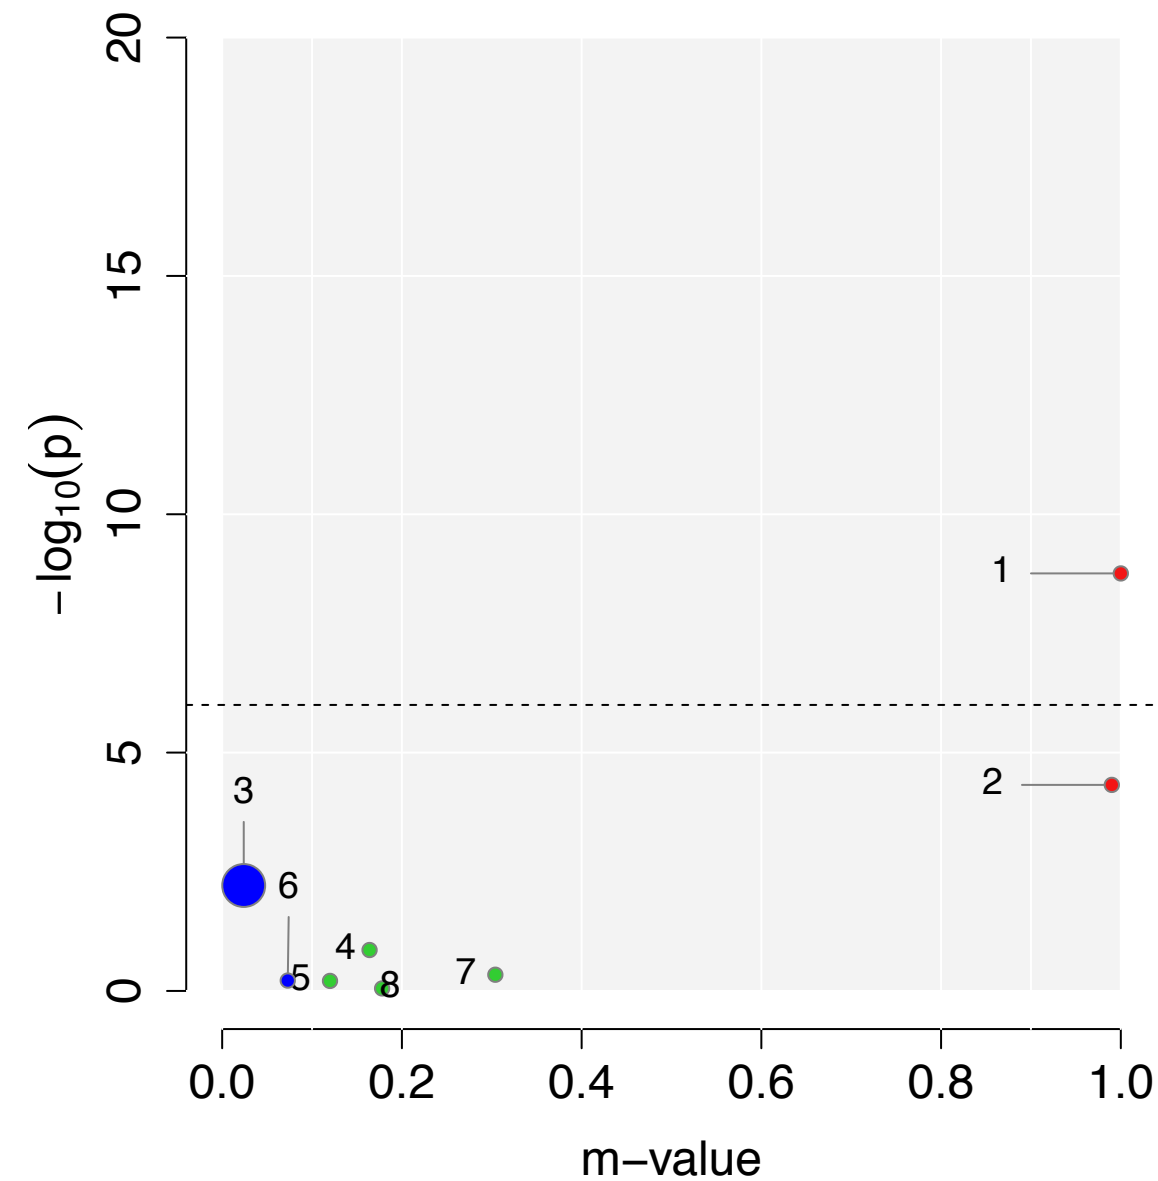

rs4298967 (Meta  $P = 7.91 \times 10^{-20}$ )

Gene : *CACNA1C*

GWAS P-value

- 5.62 x 10<sup>-8</sup> ● 1.SCZ
- 3.46 x 10<sup>-9</sup> ● 2.BIP
- 0.0030 ● 3.MD
- 0.1400 ● 4.ASD
- 0.6098 ● 5.ADHD
- 0.1144 ● 6.TS
- 0.3812 ● 7.ANO
- 0.2051 ● 8.OCD

FE summary

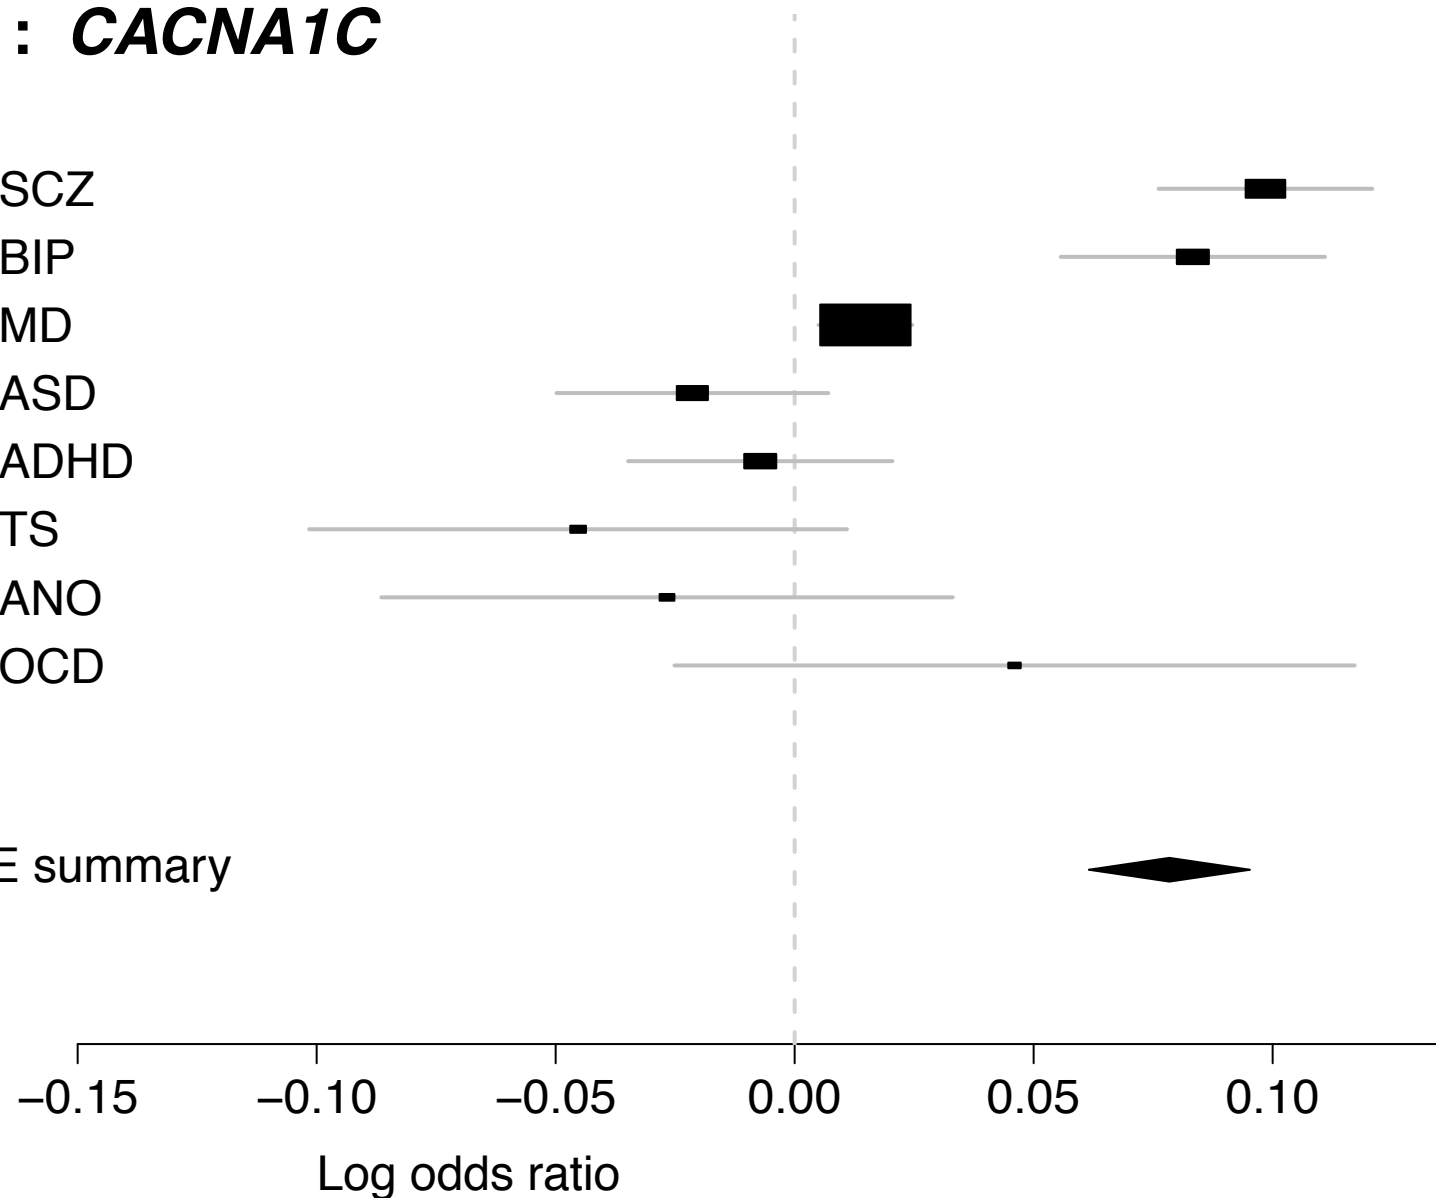

PM-Plot

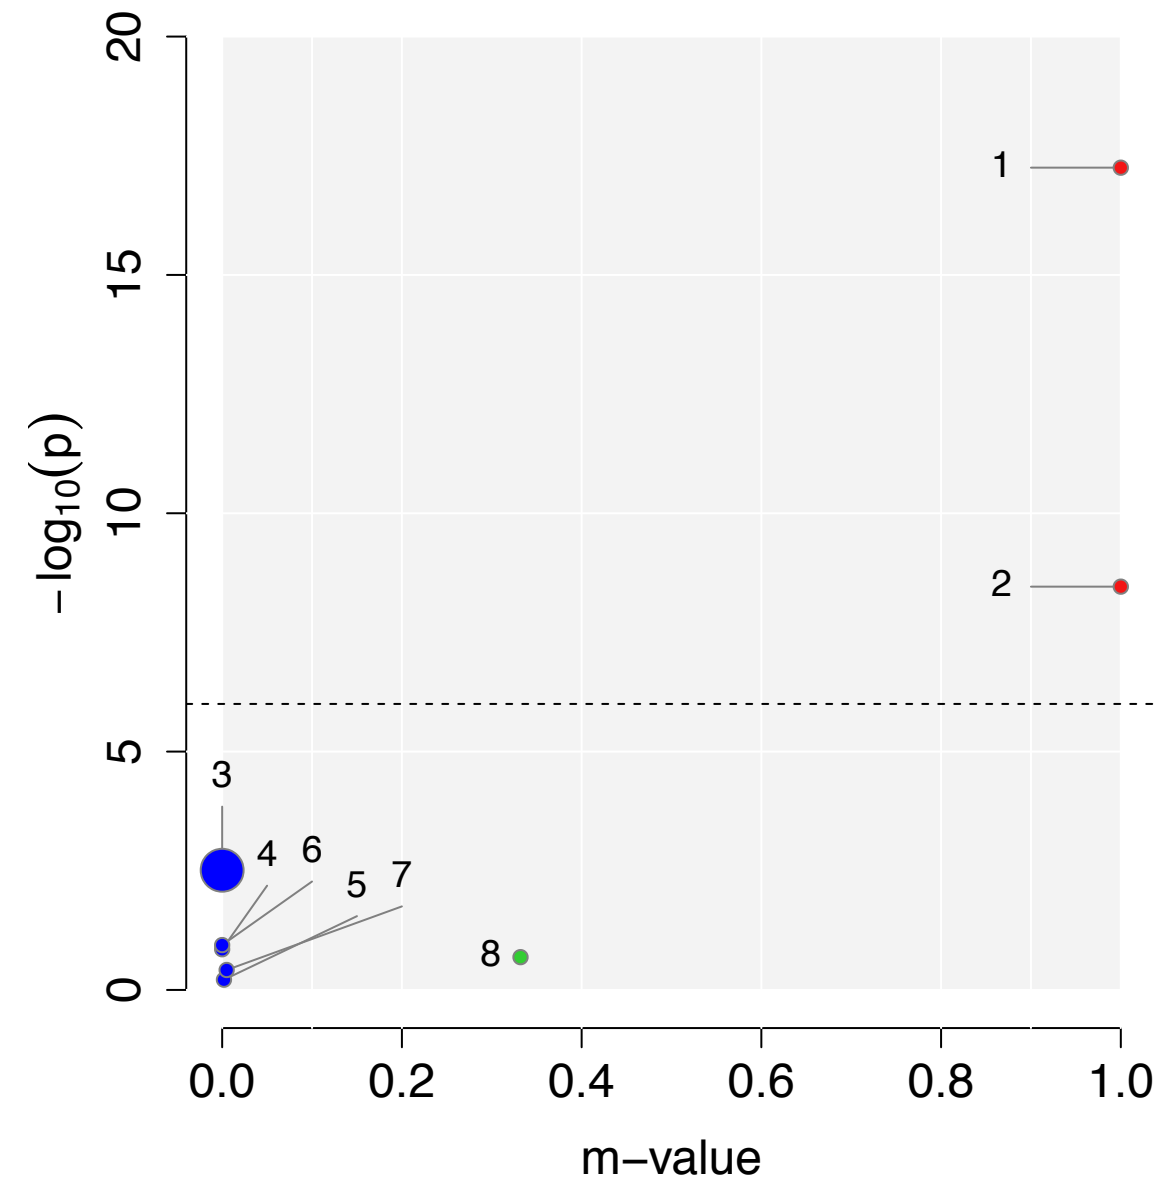

# rs4380187 (Meta $P = 8.48 \times 10^{-12}$ )

Gene : *ZNF804A*

## GWAS P-value

- 2.26 x 10<sup>-11</sup> ● 1.SCZ
- 1.15 x 10<sup>-5</sup> ● 2.BIP
- 0.1629 ● 3.MD
- 0.0470 ● 4.ASD
- 0.1590 ● 5.ADHD
- 0.3724 ● 6.TS
- 0.3189 ● 7.ANO
- 0.1137 ● 8.OCD

FE summary

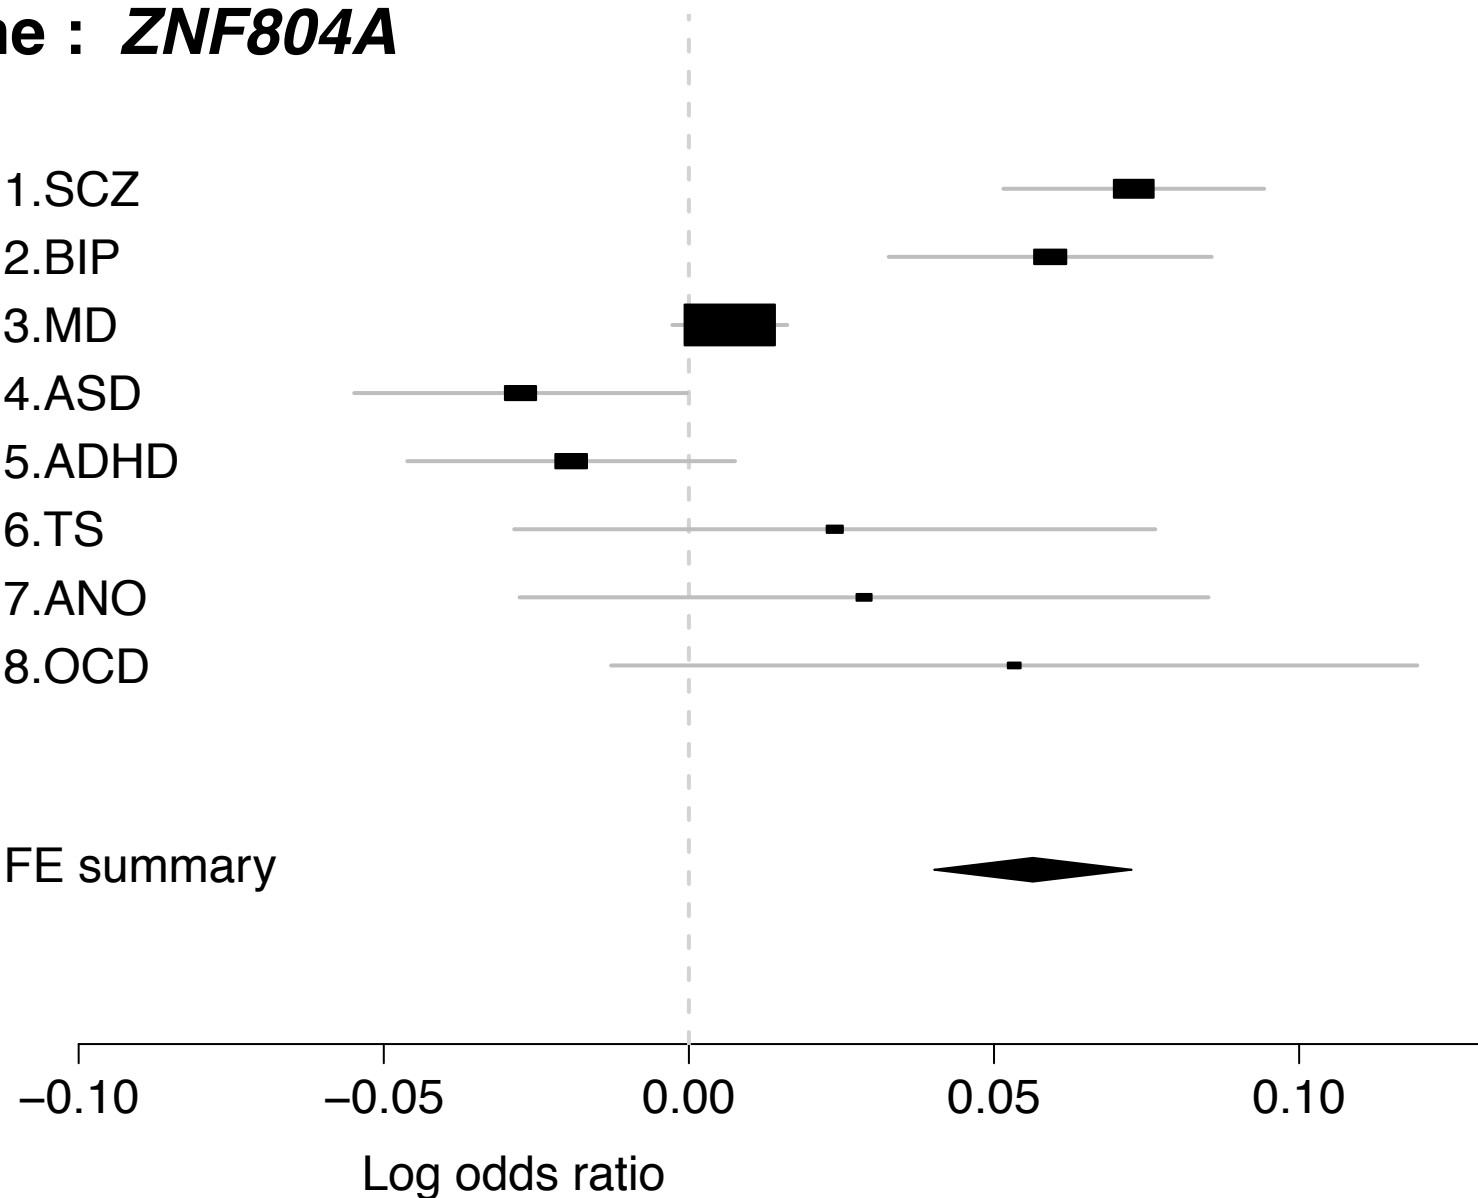

## PM-Plot

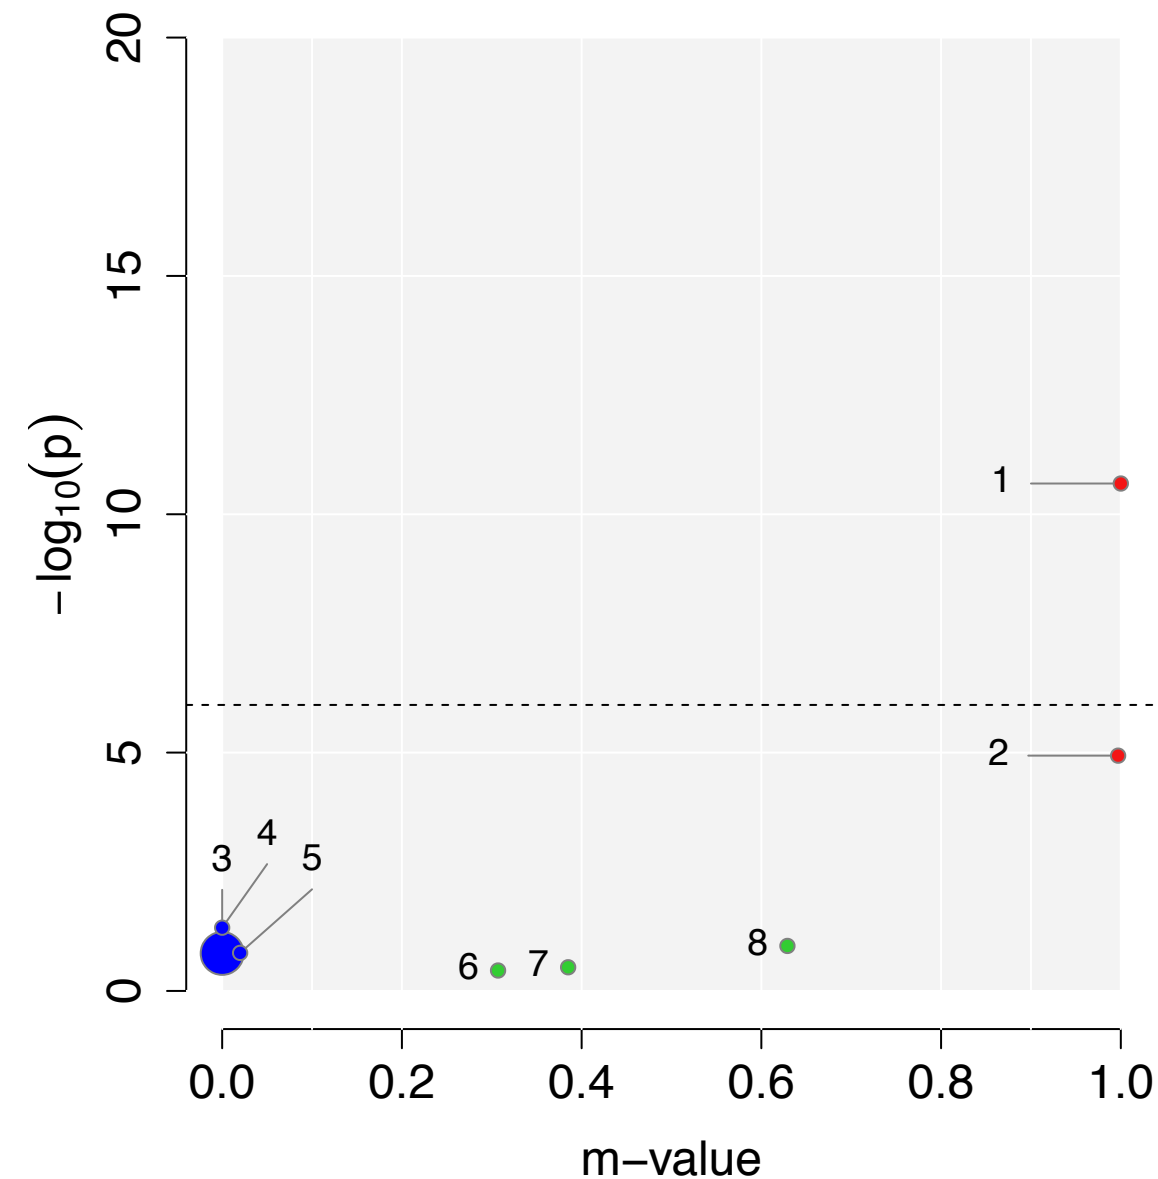

rs4391122 (Meta  $P = 9.6e \times 10^{-11}$ )

Gene : **ZSWIM6**

GWAS P-value

- $8.28 \times 10^{-3}$  ● 1.SCZ
- 0.0084 ● 2.BIP
- 0.7234 ● 3.MD
- 0.0309 ● 4.ASD
- 0.9055 ● 5.ADHD
- 0.4379 ● 6.TS
- 0.9264 ● 7.ANO
- 0.9096 ● 8.OCD

FE summary

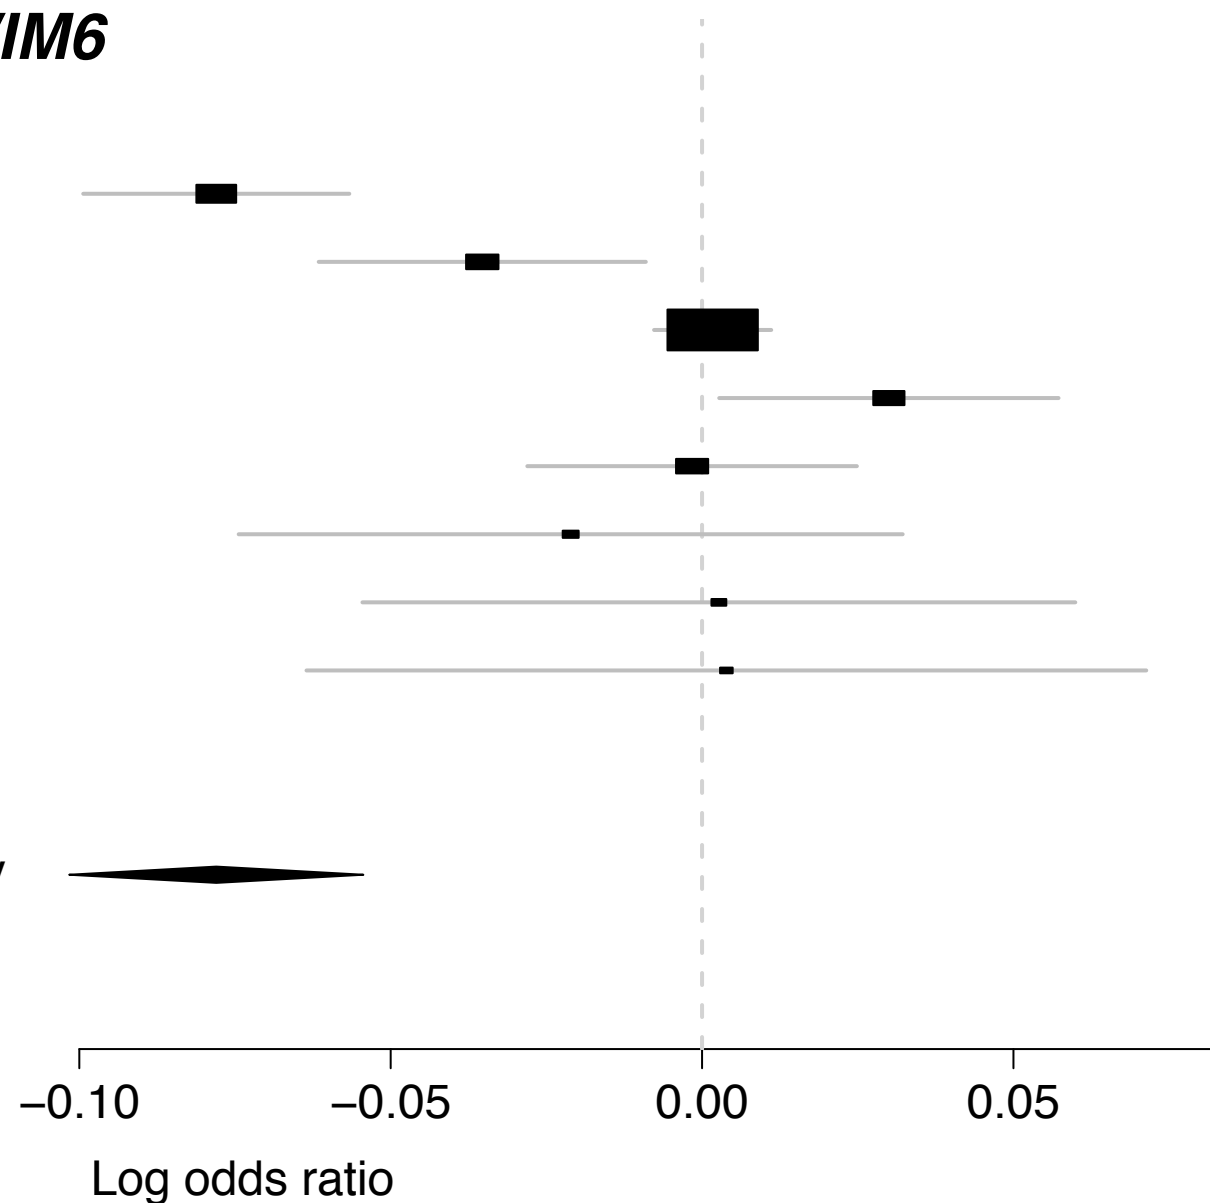

PM-Plot

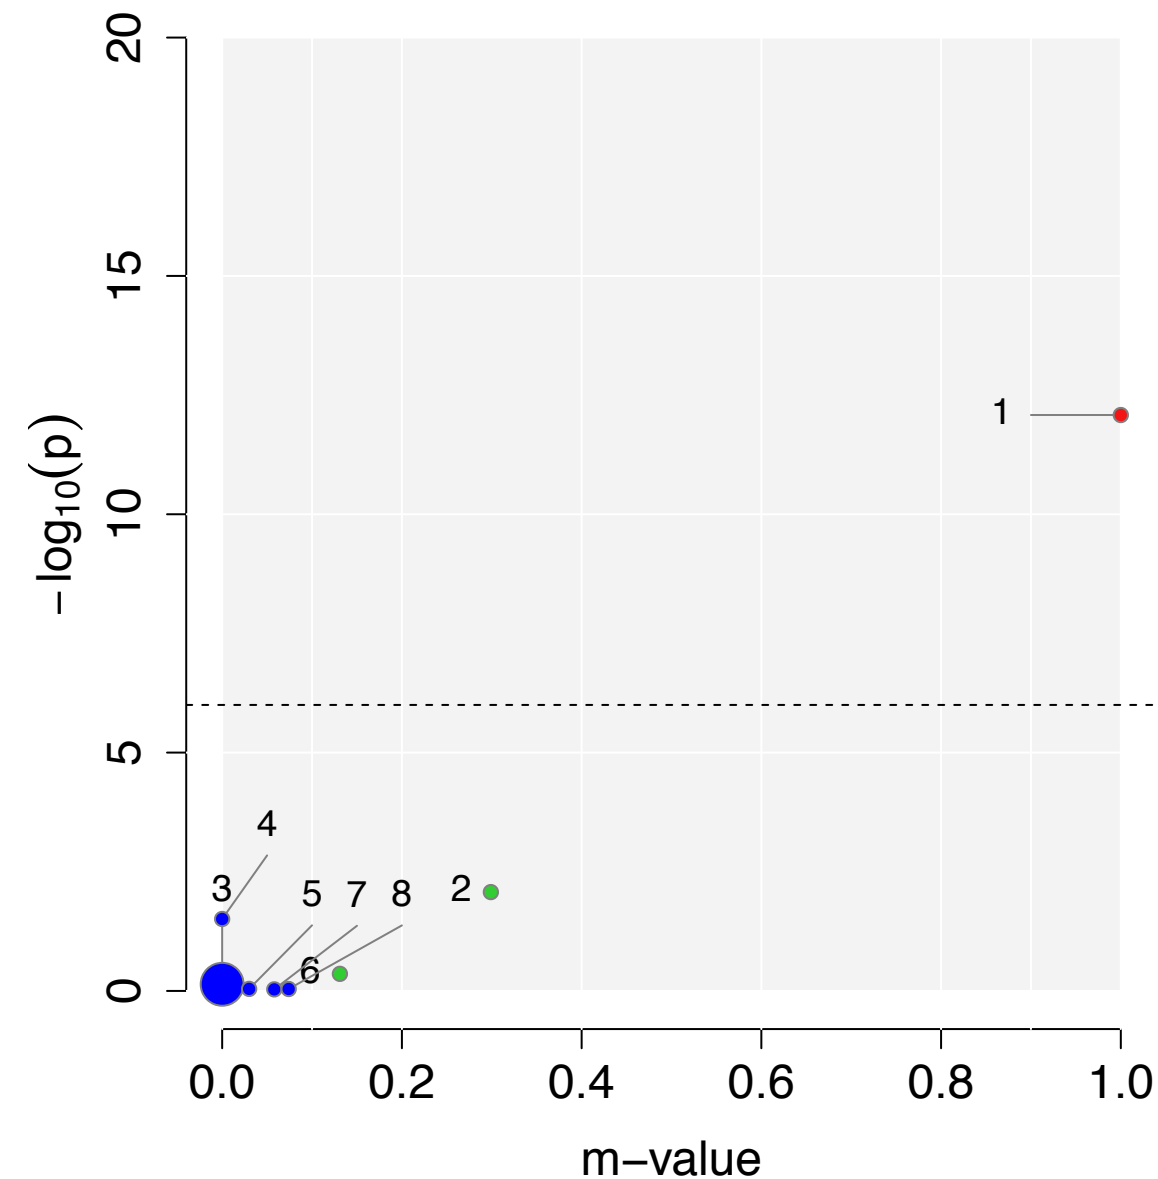

rs4481150 (Meta  $P = 4.79 \times 10^{-17}$ )

Gene : *ITIH3*, *ITIH4*

GWAS P-value

- 1.12 x 10<sup>-10</sup> ● 1.SCZ
- 1.17 x 10<sup>-8</sup> ● 2.BIP
- 0.0139 ● 3.MD
- 0.0001 ● 4.ASD
- 0.8474 ● 5.ADHD
- 0.0514 ● 6.TS
- 0.1570 ● 7.ANO
- 0.0508 ● 8.OCD

FE summary

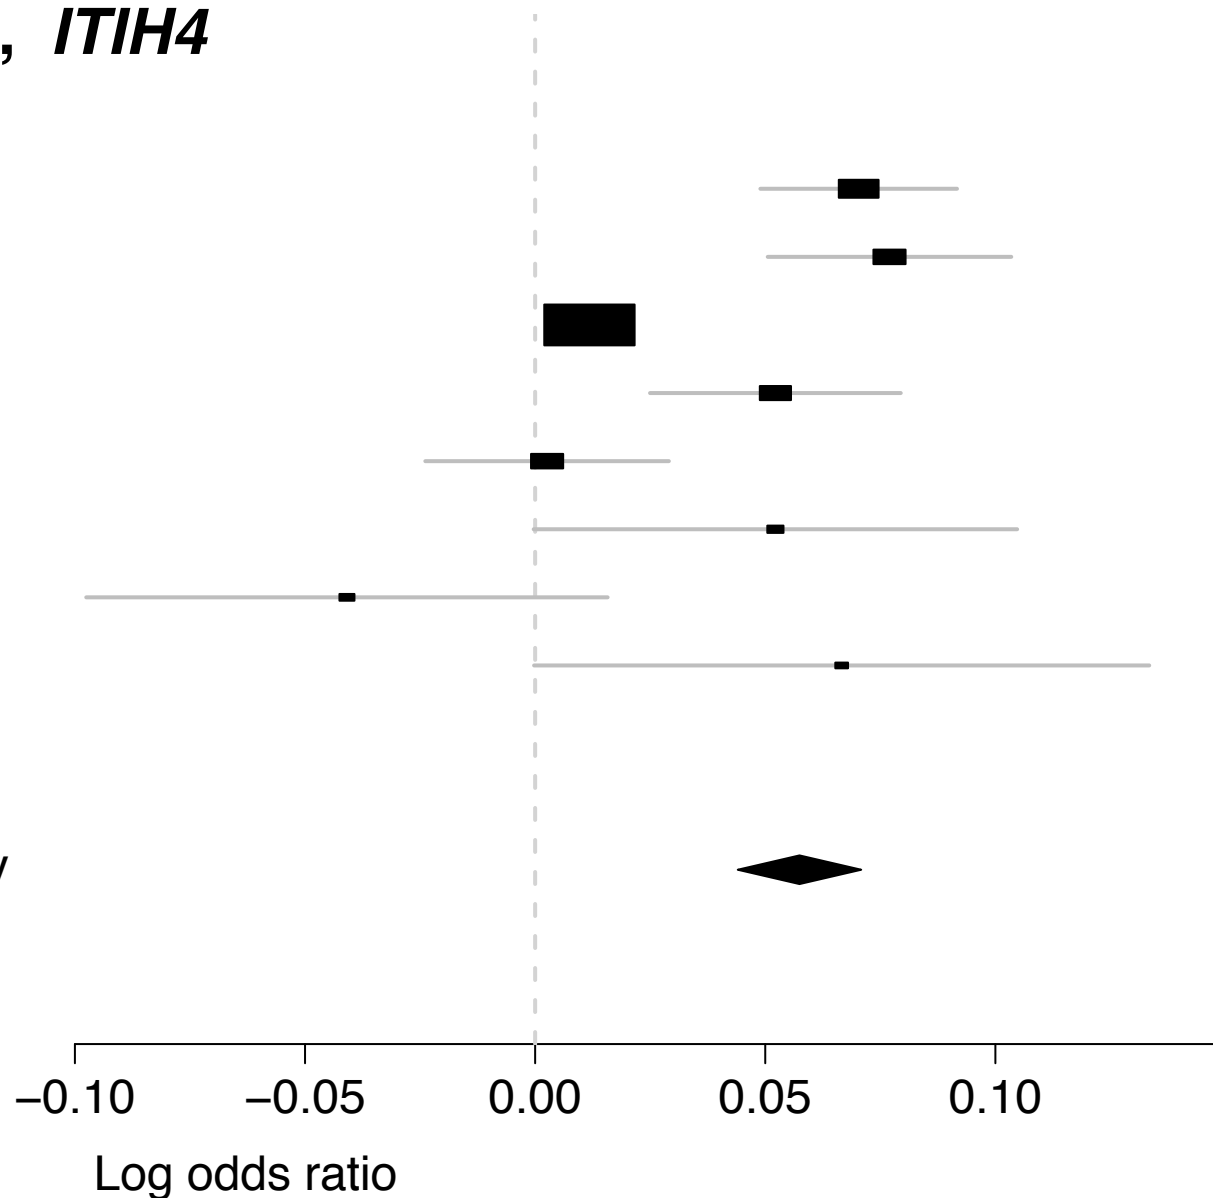

PM-Plot

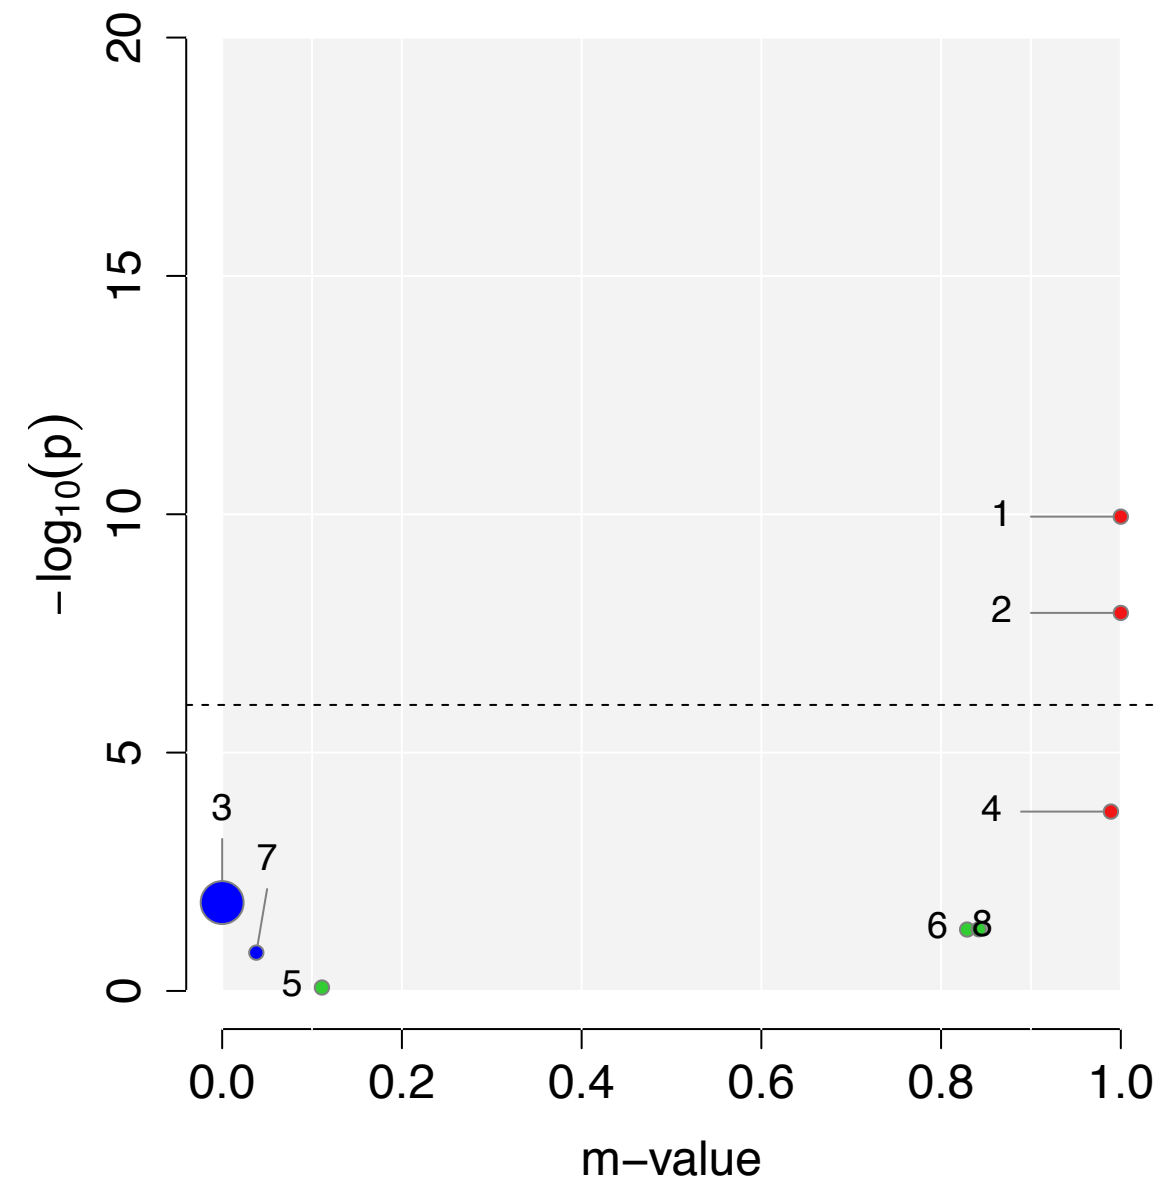

# rs4495234 (Meta $P = 3.74 \times 10^{-8}$ )

Gene : *PPP2R2B*

## GWAS P-value

- $8.77 \times 10^{-6}$  ● 1.SCZ
- $9.39 \times 10^{-5}$  ● 2.BIP
- 0.4893 ● 3.MD
- 0.0432 ● 4.ASD
- 0.2198 ● 5.ADHD
- 0.0142 ● 6.TS
- 0.3499 ● 7.ANO
- 0.0291 ● 8.OCD

FE summary

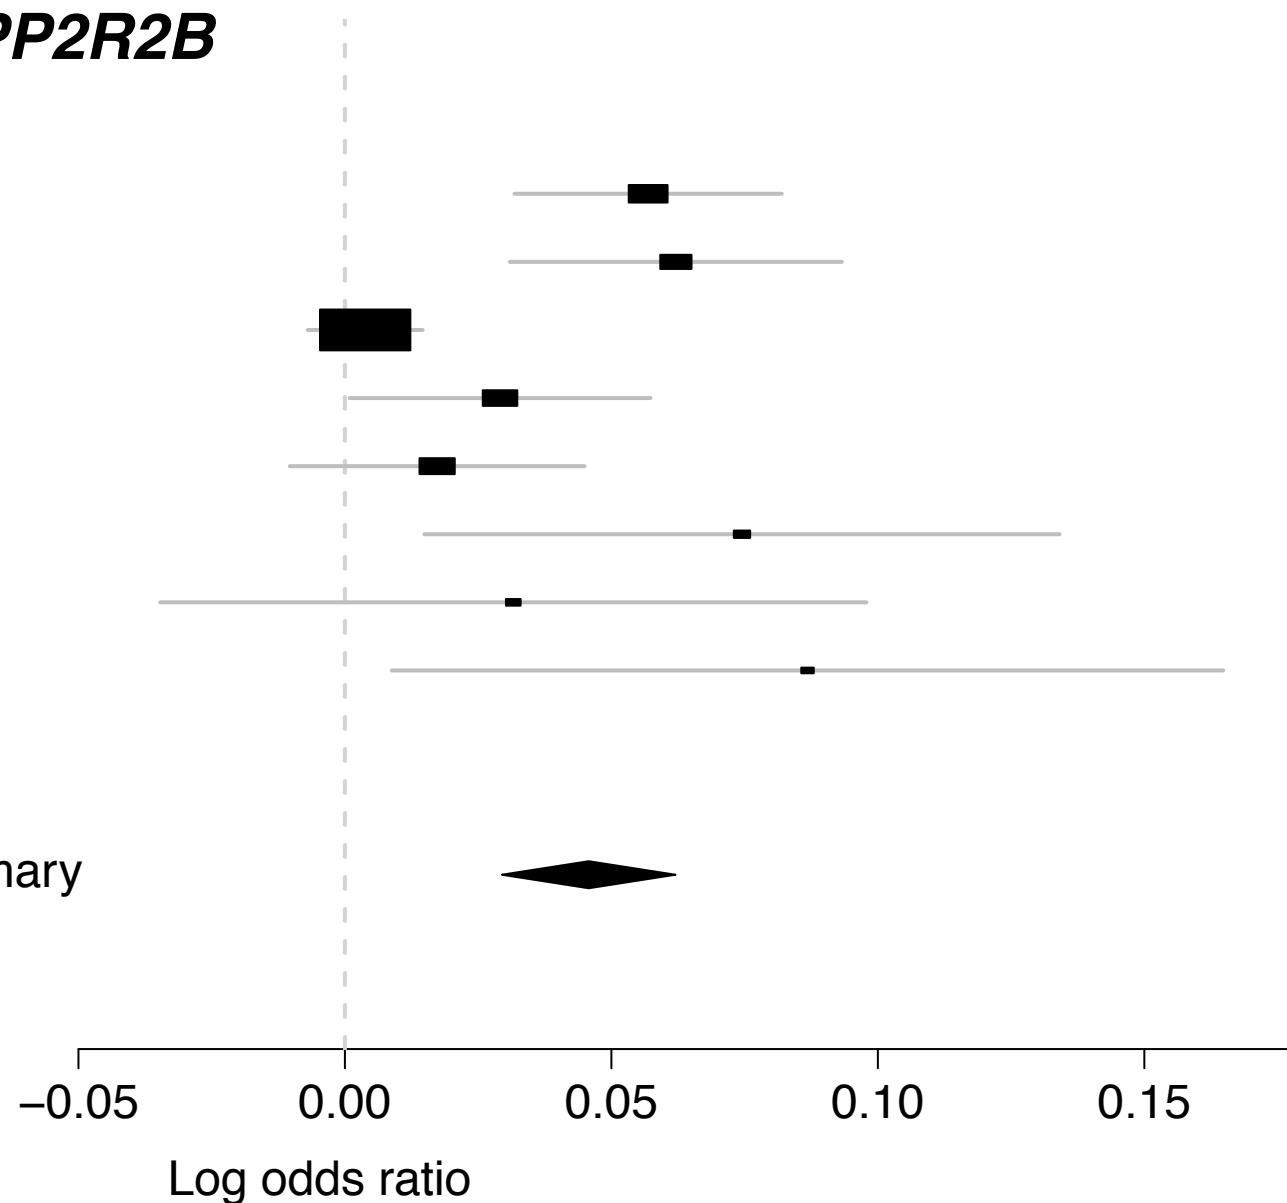

## PM-Plot

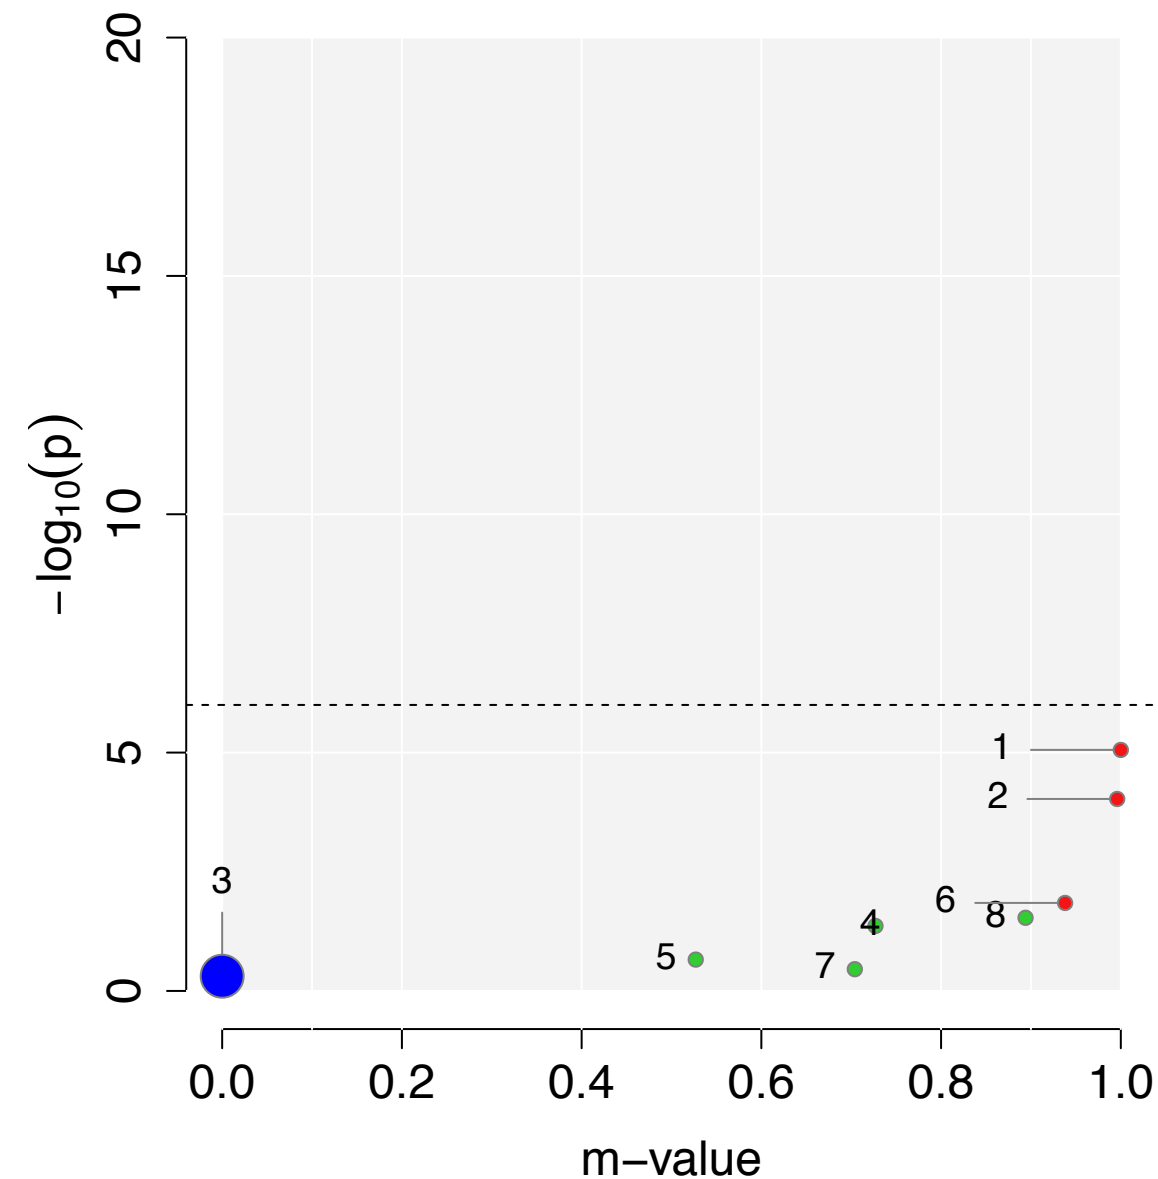

# rs4526442 (Meta $P = 4.1e \times 10^{-8}$ )

Gene : **ZCCHC7**

## GWAS P-value

- 0.4531 ● 1.SCZ
- 0.0006 ● 2.BIP
- $7.03 \times 10^{-8}$  ● 3.MD
- 0.1350 ● 4.ASD
- 0.3091 ● 5.ADHD
- 0.1914 ● 6.TS
- 0.8222 ● 7.ANO
- 0.6938 ● 8.OCD

FE summary

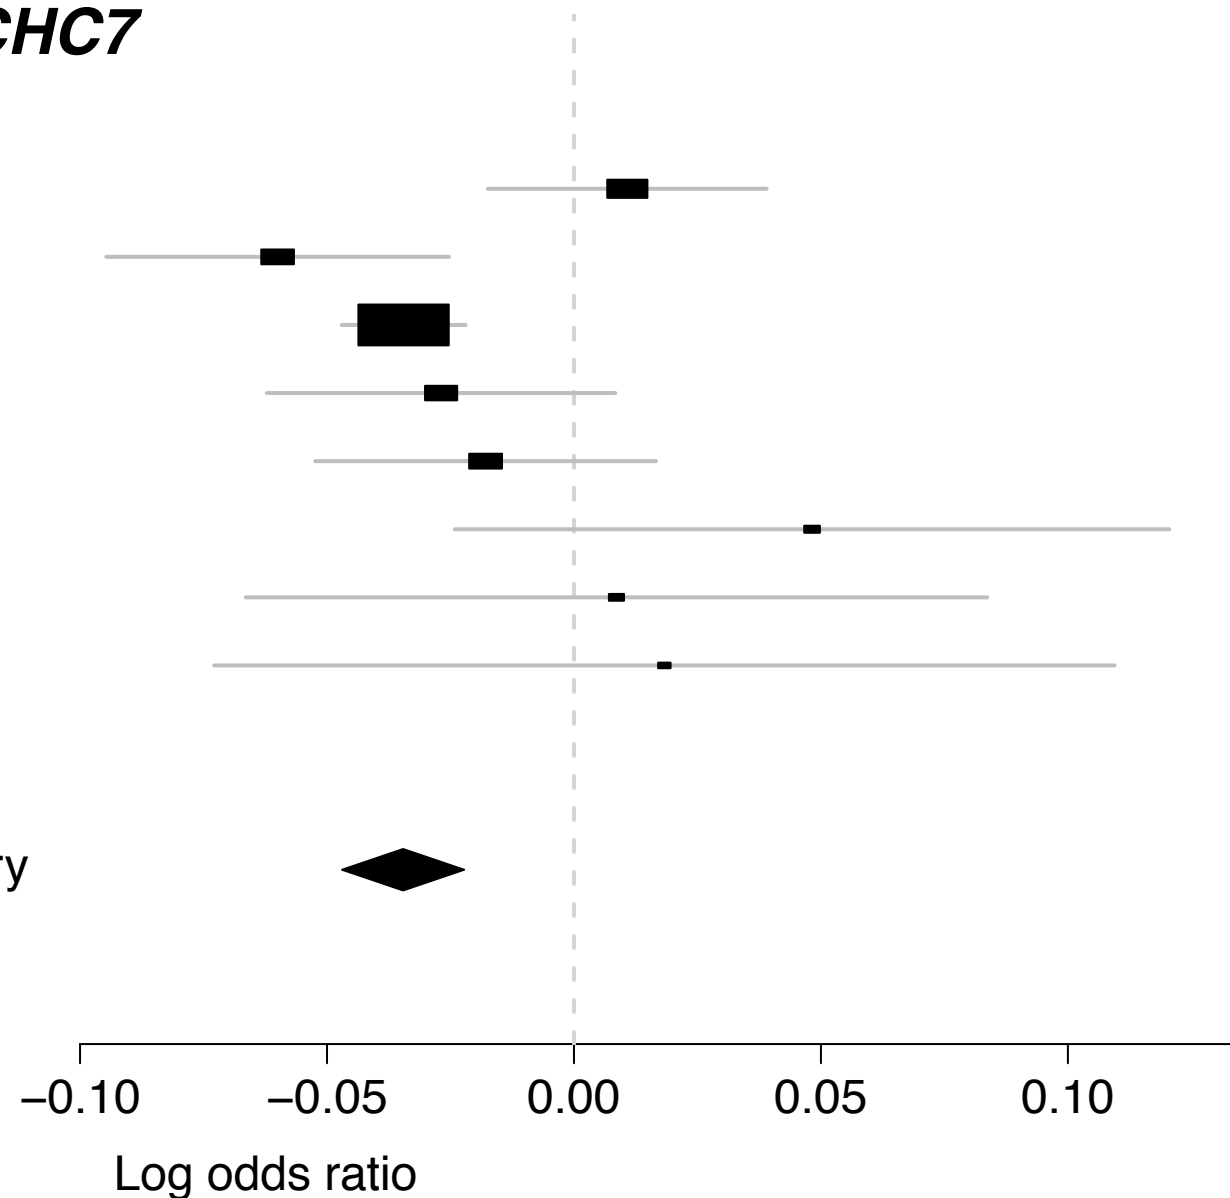

## PM-Plot

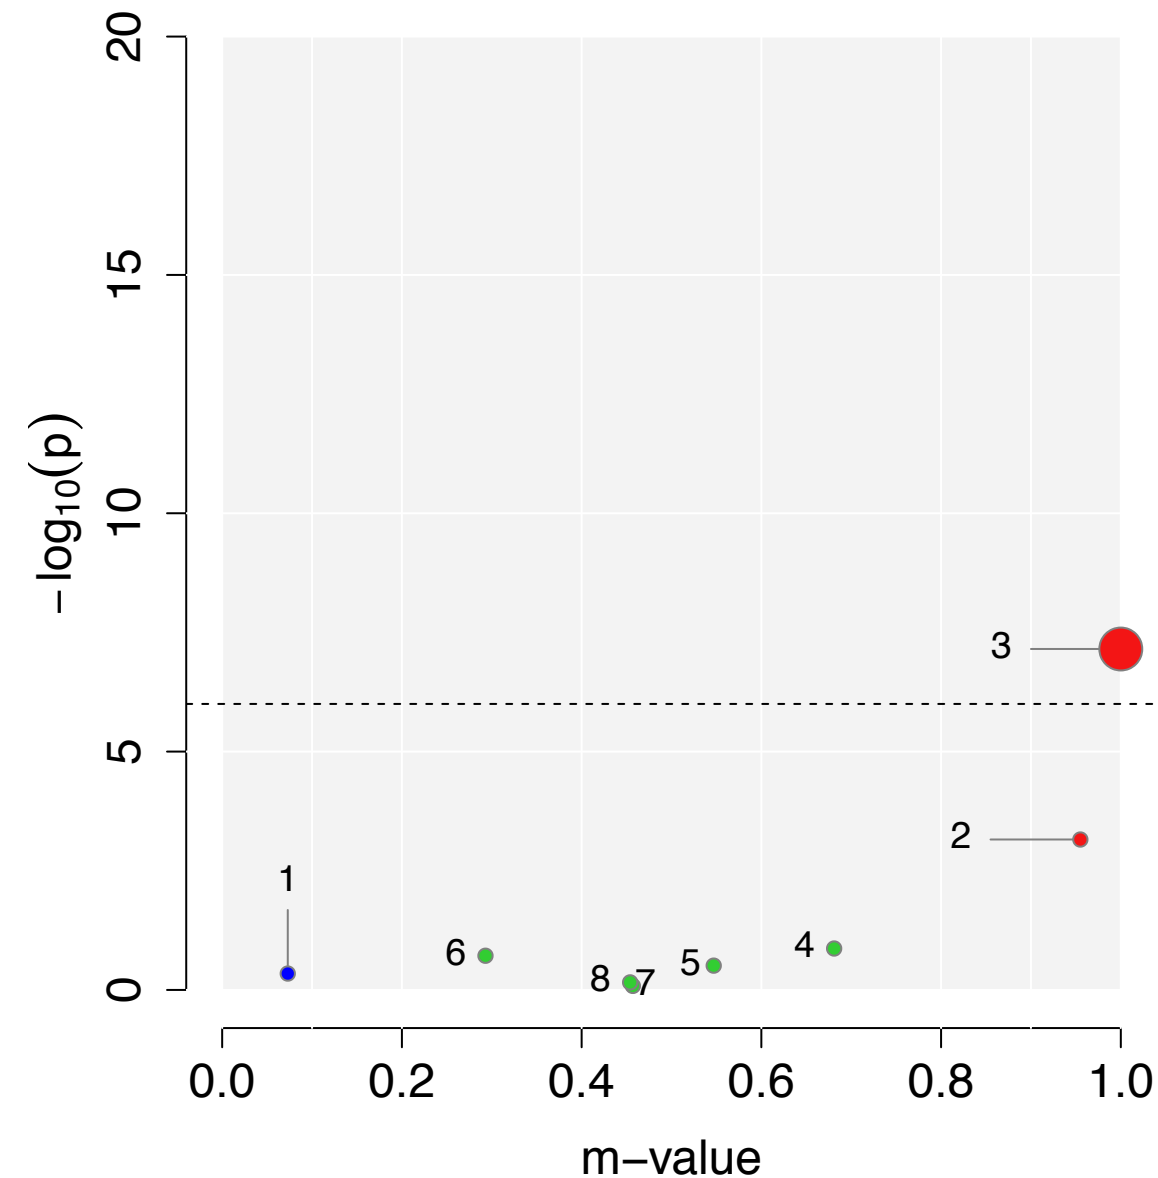



# rs4619651 (Meta $P = 1.47 \times 10^{-9}$ )

Gene : *LMAN2L*, *CNNM4*

## GWAS P-value

- 1.50 x 10<sup>-6</sup> ● 1.SCZ
- 5.21 x 10<sup>-9</sup> ● 2.BIP
- 0.2044 ● 3.MD
- 0.0751 ● 4.ASD
- 0.3631 ● 5.ADHD
- 0.6916 ● 6.TS
- 0.5237 ● 7.ANO
- 0.9802 ● 8.OCD

FE summary

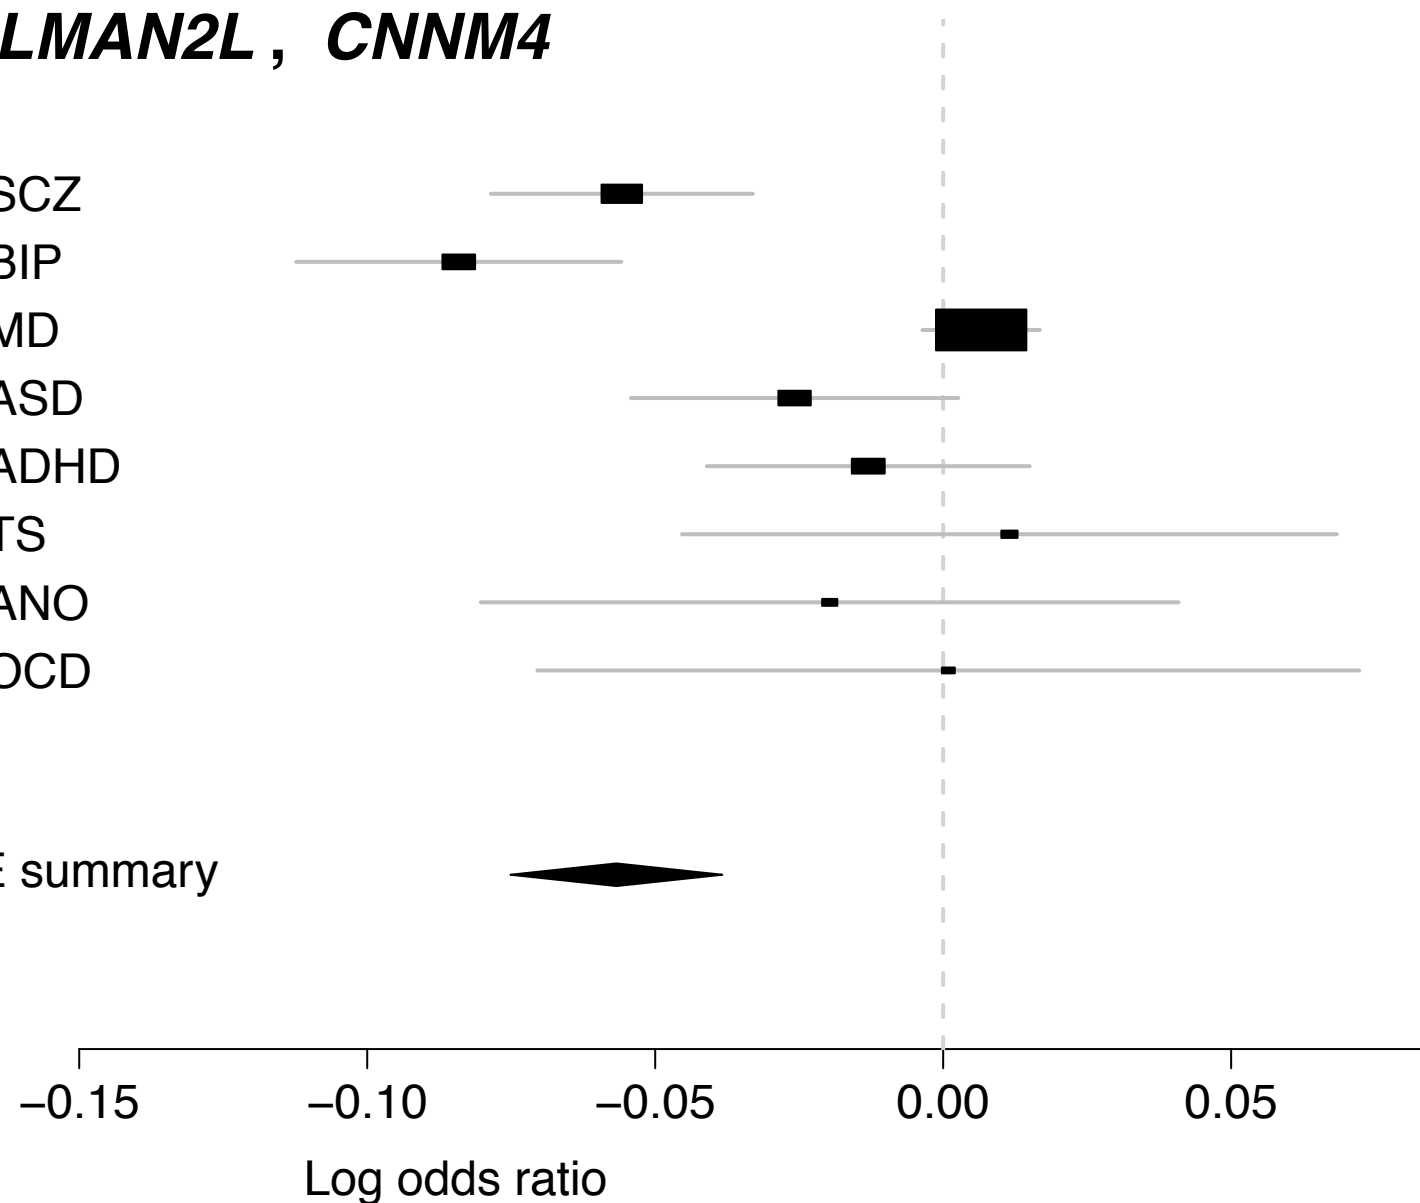

## PM-Plot

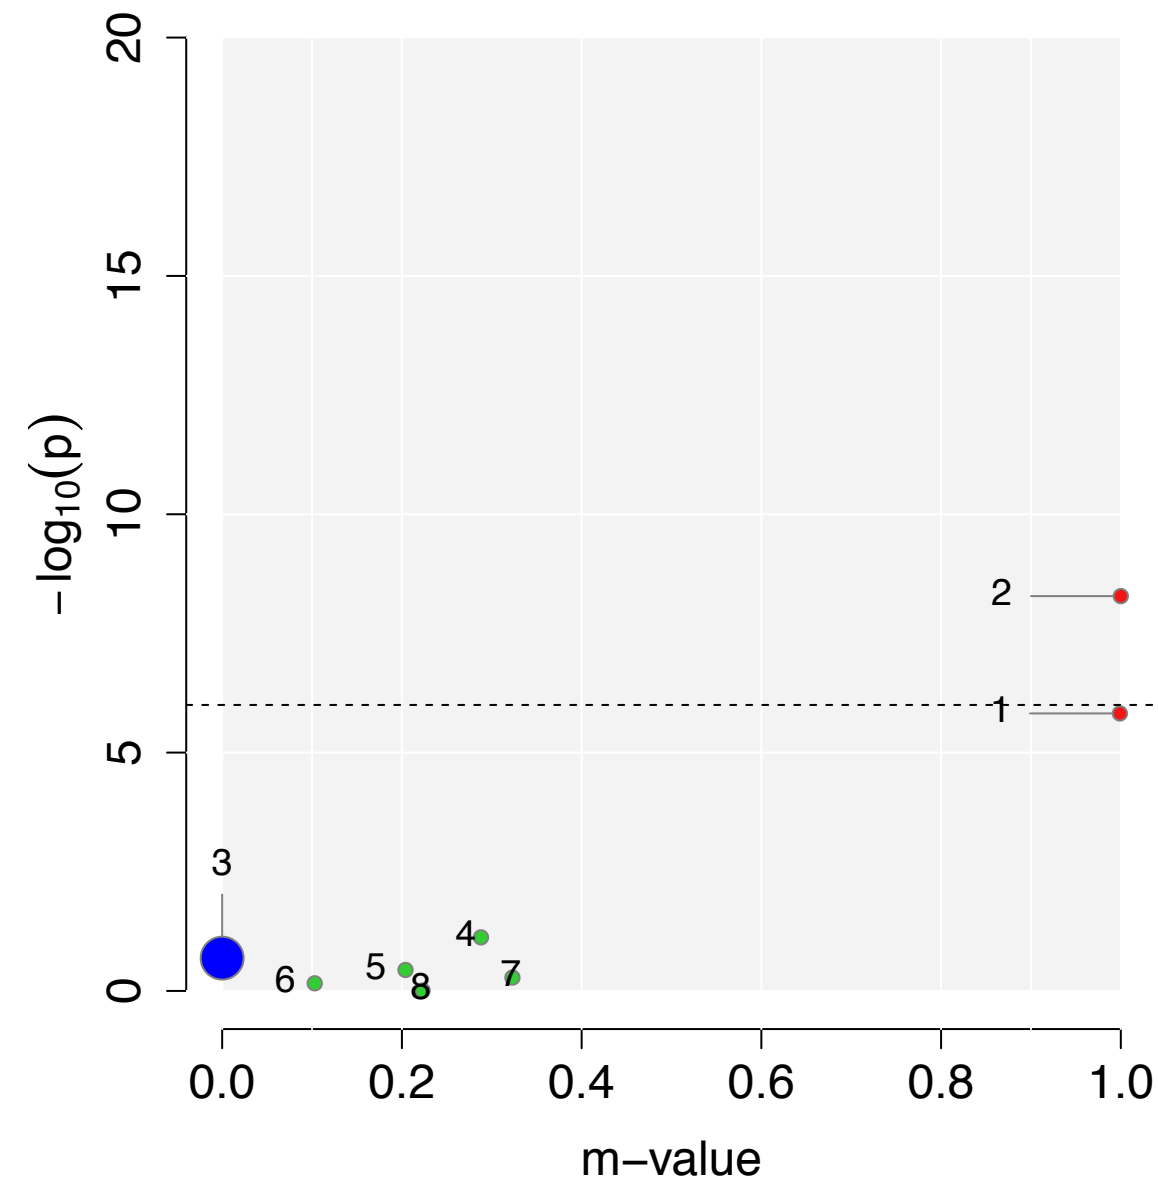

# rs4647903 (Meta $P = 1.69 \times 10^{-9}$ )

Gene : *FGFR1*, *LETM2*

## GWAS P-value

- 1.85 x 10<sup>-6</sup> ● 1.SCZ
- 5.15 x 10<sup>-6</sup> ● 2.BIP
- 0.0039 ● 3.MD
- 0.0059 ● 4.ASD
- 0.0220 ● 5.ADHD
- 0.0485 ● 6.TS
- 0.2984 ● 7.ANO
- 0.0855 ● 8.OCD

FE summary

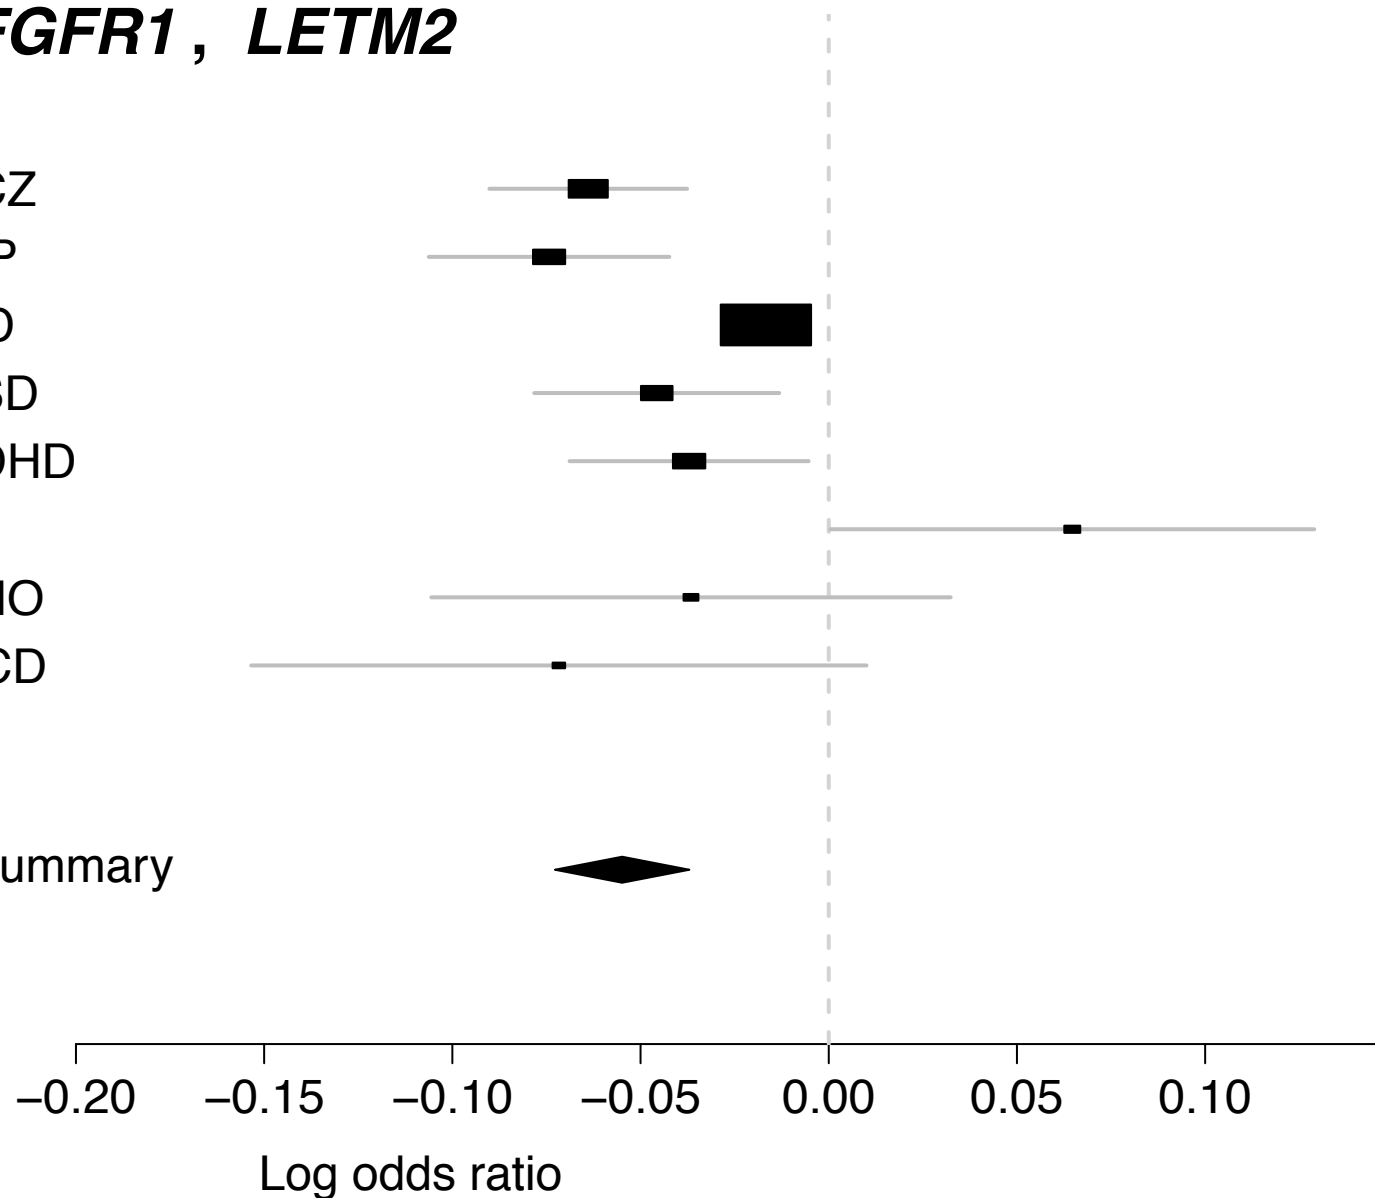

## PM-Plot

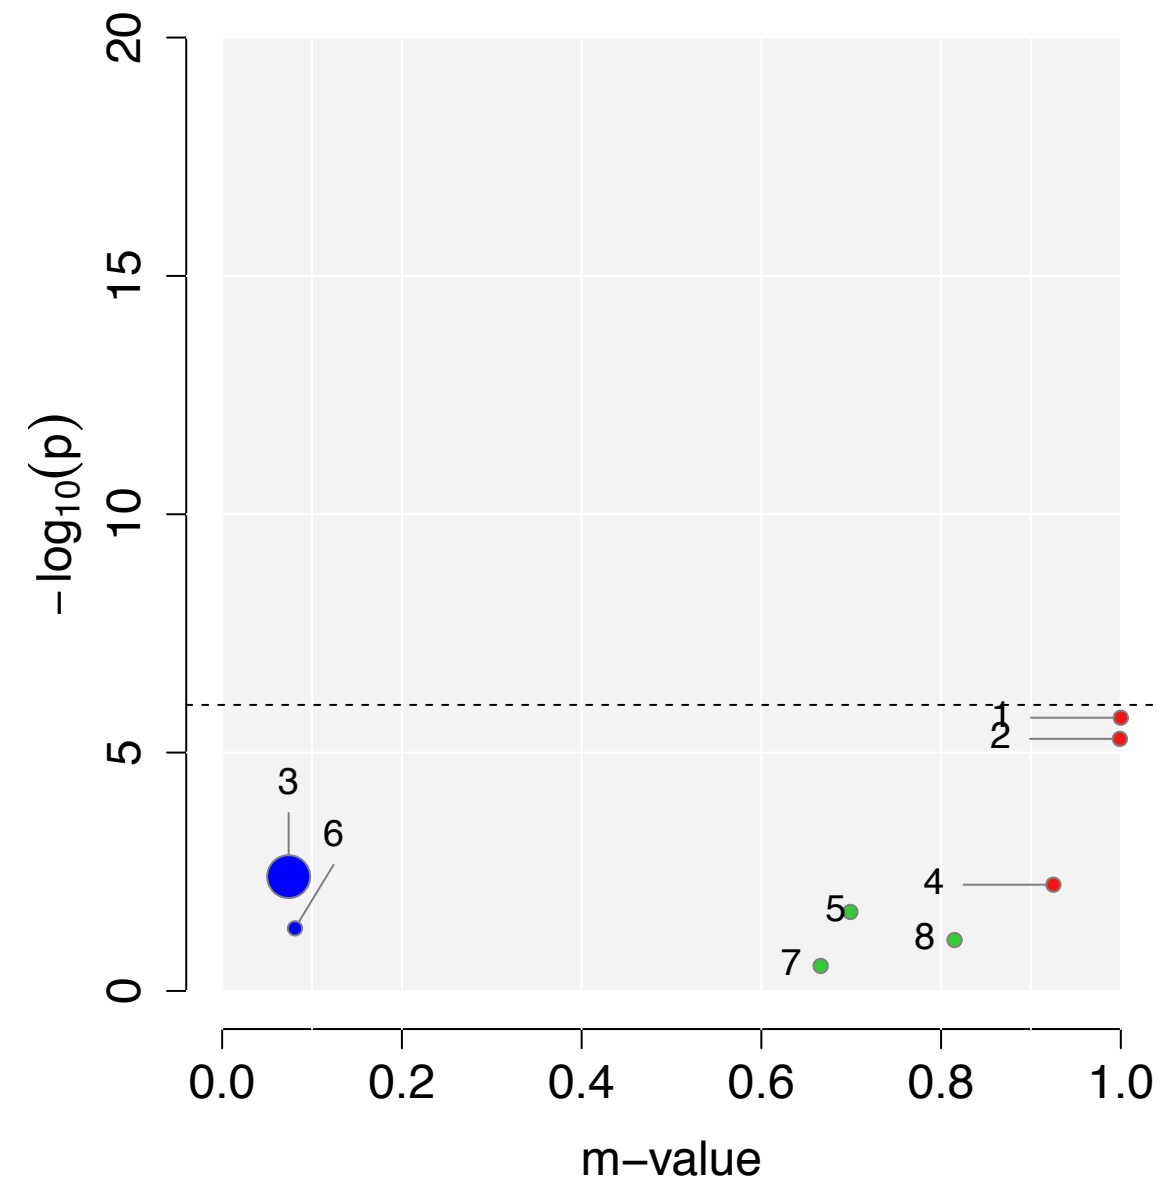

rs4682973 (Meta  $P = 4.06 \times 10^{-8}$ )

Gene : *TCAIM*, *TOPAZ1*

GWAS P-value

- 0.0037 ● 1.SCZ
- 0.5946 ● 2.BIP
- $6.97 \times 10^{-8}$  ● 3.MD
- 0.4668 ● 4.ASD
- 0.1017 ● 5.ADHD
- 0.4495 ● 6.TS
- 0.8147 ● 7.ANO
- 0.0814 ● 8.OCD

FE summary

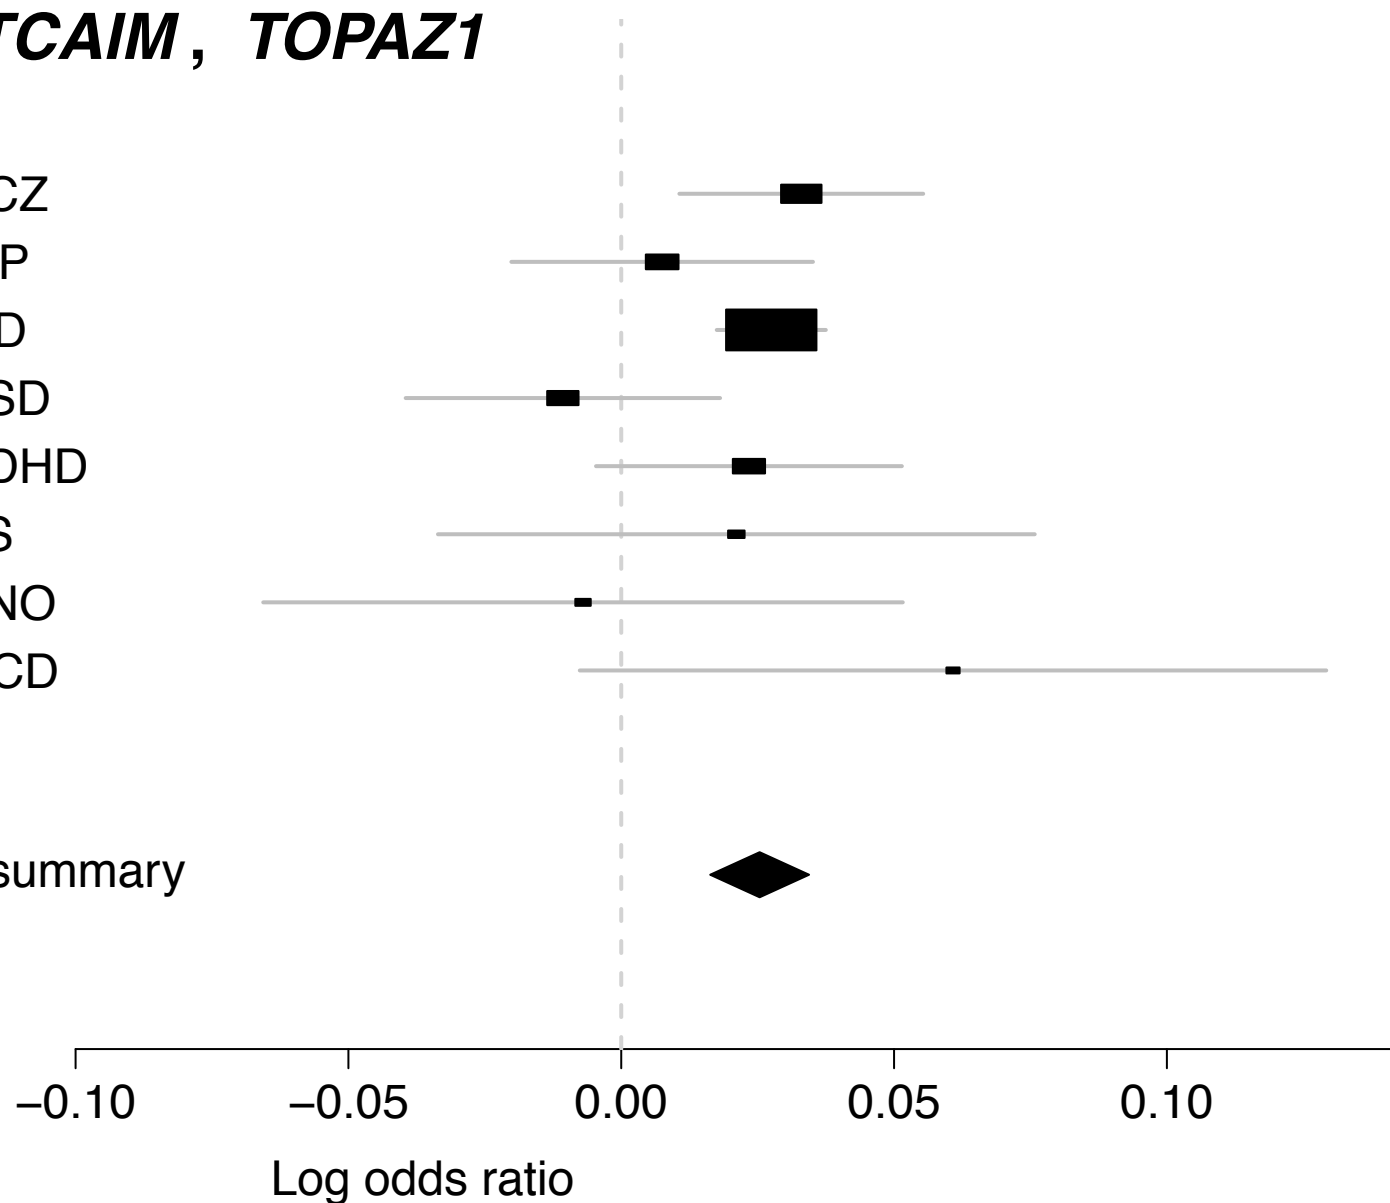

PM-Plot

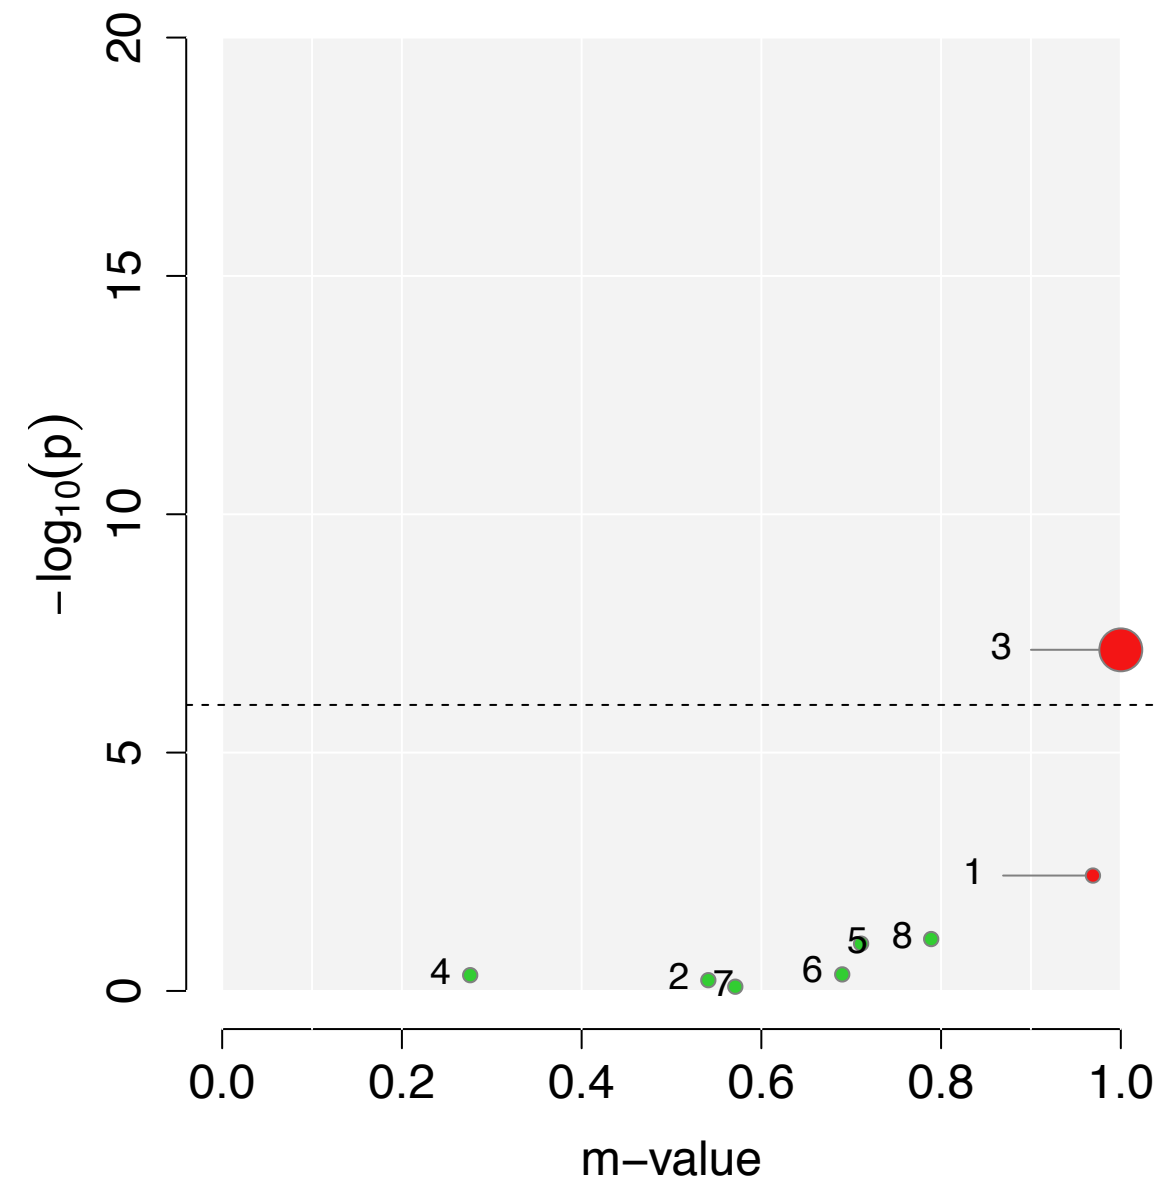

# rs4730387 (Meta $P = 2.73 \times 10^{-8}$ )

Gene : (>200kb)

## GWAS P-value

- 0.0096 ● 1.SCZ
- 0.9174 ● 2.BIP
- $1.01 \times 10^{-8}$  ● 3.MD
- 0.6273 ● 4.ASD
- 0.9825 ● 5.ADHD
- 0.8843 ● 6.TS
- 0.2449 ● 7.ANO
- 0.4233 ● 8.OCD

FE summary

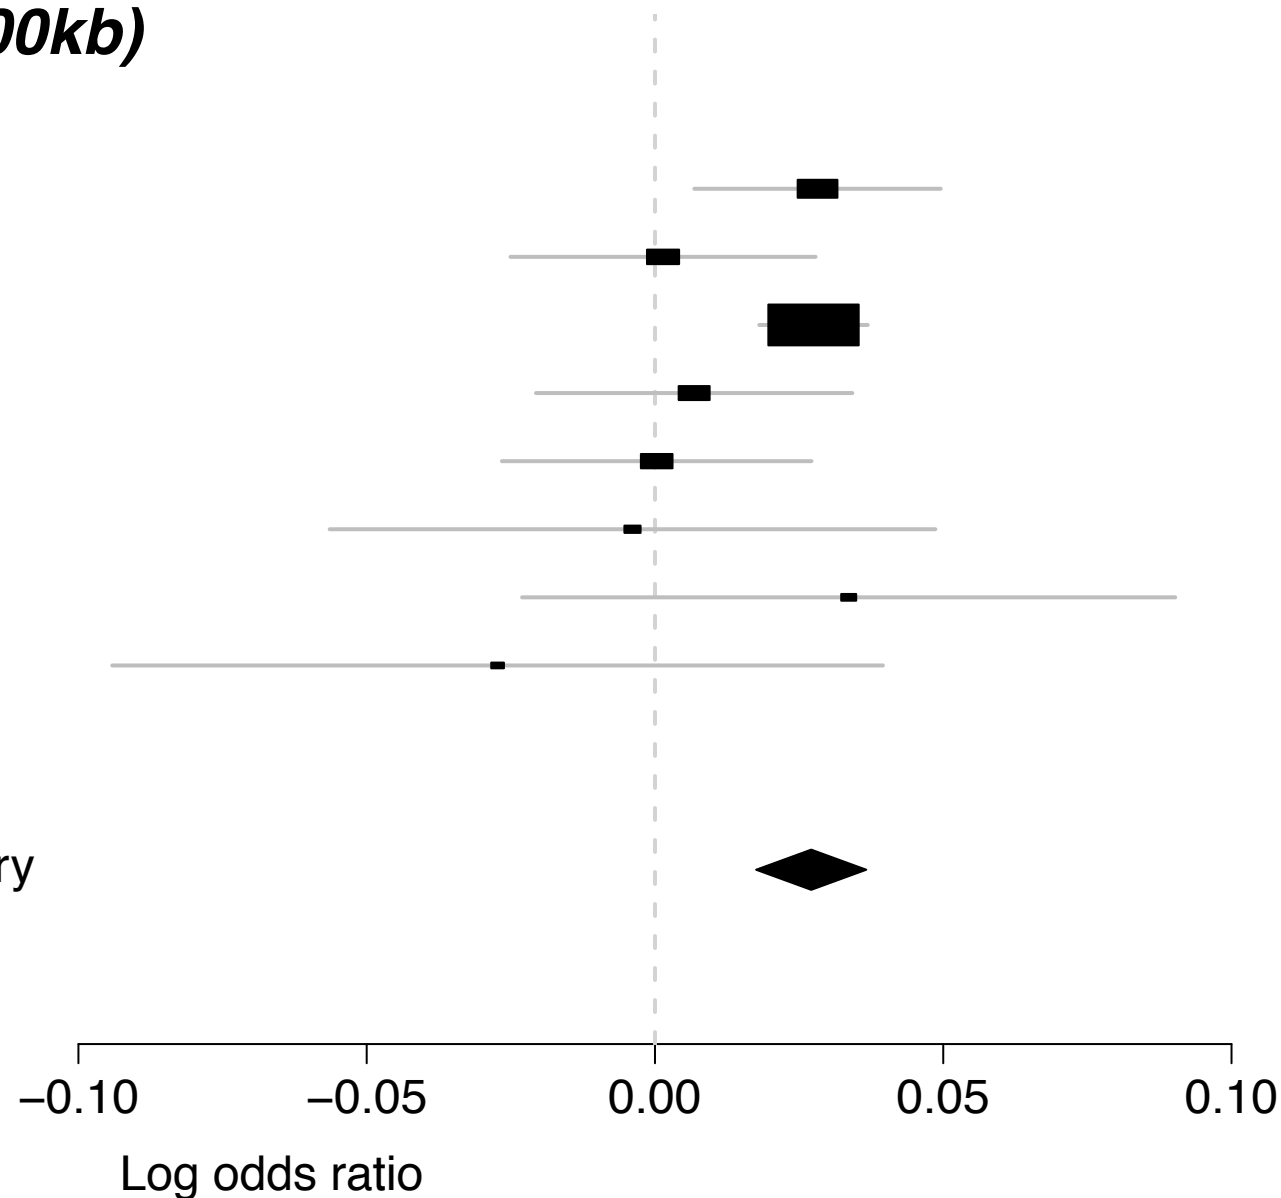

## PM-Plot

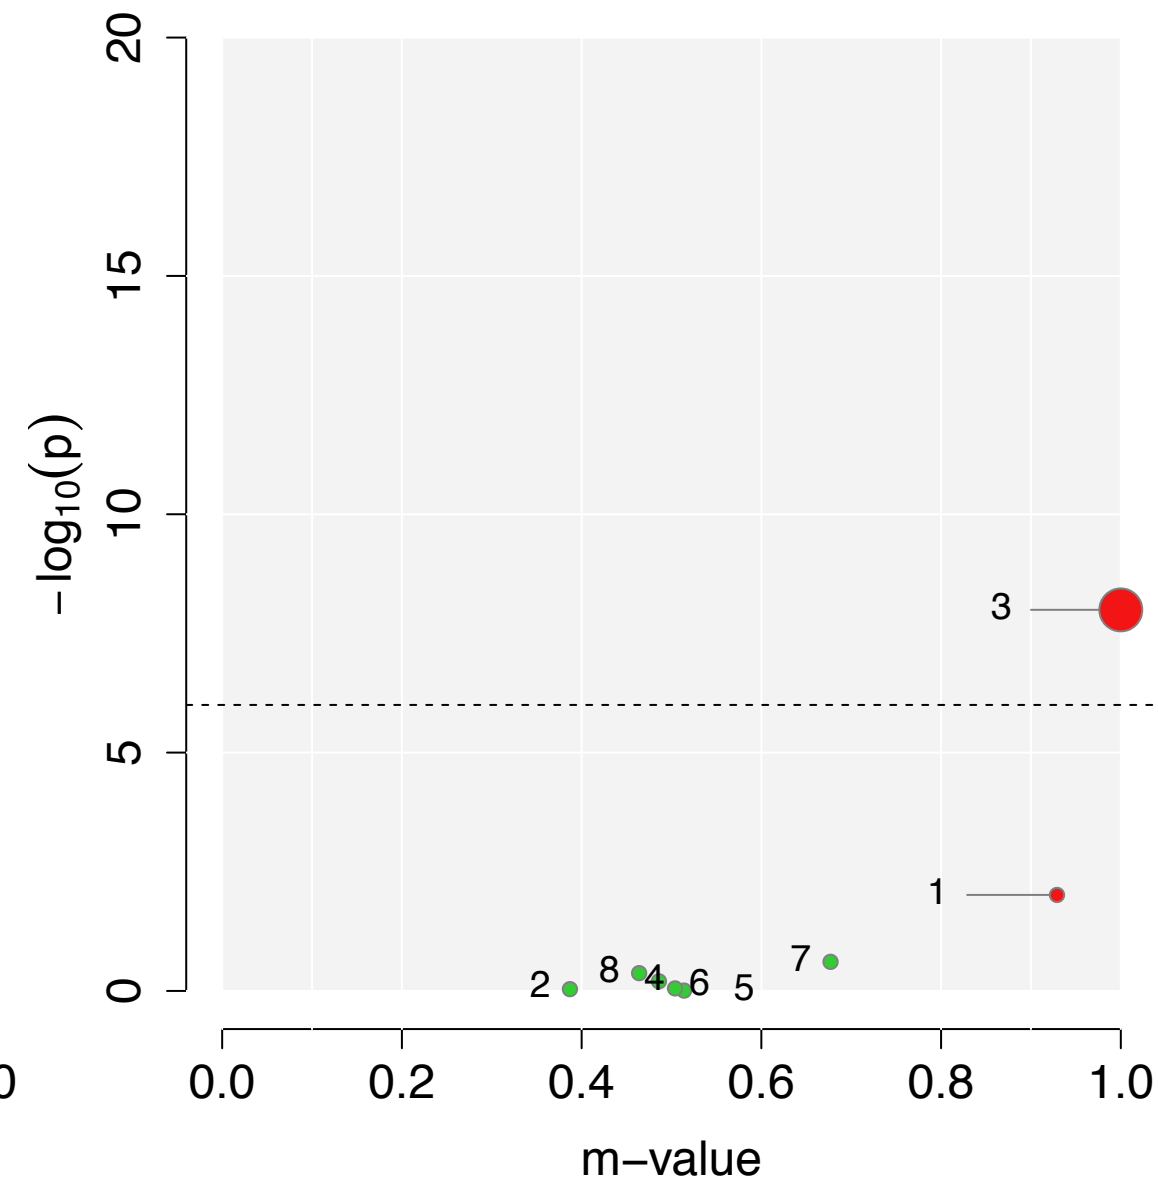

rs4766428 (Meta  $P = 4.55 \times 10^{-8}$ )

Gene : *ATP2A2*, *IFT81*

GWAS P-value

- 5.79 x 10<sup>-10</sup> ● 1.SCZ
- 0.3879 ● 2.BIP
- 0.0135 ● 3.MD
- 0.8574 ● 4.ASD
- 0.2003 ● 5.ADHD
- 0.1598 ● 6.TS
- 0.5929 ● 7.ANO
- 0.6180 ● 8.OCD

FE summary

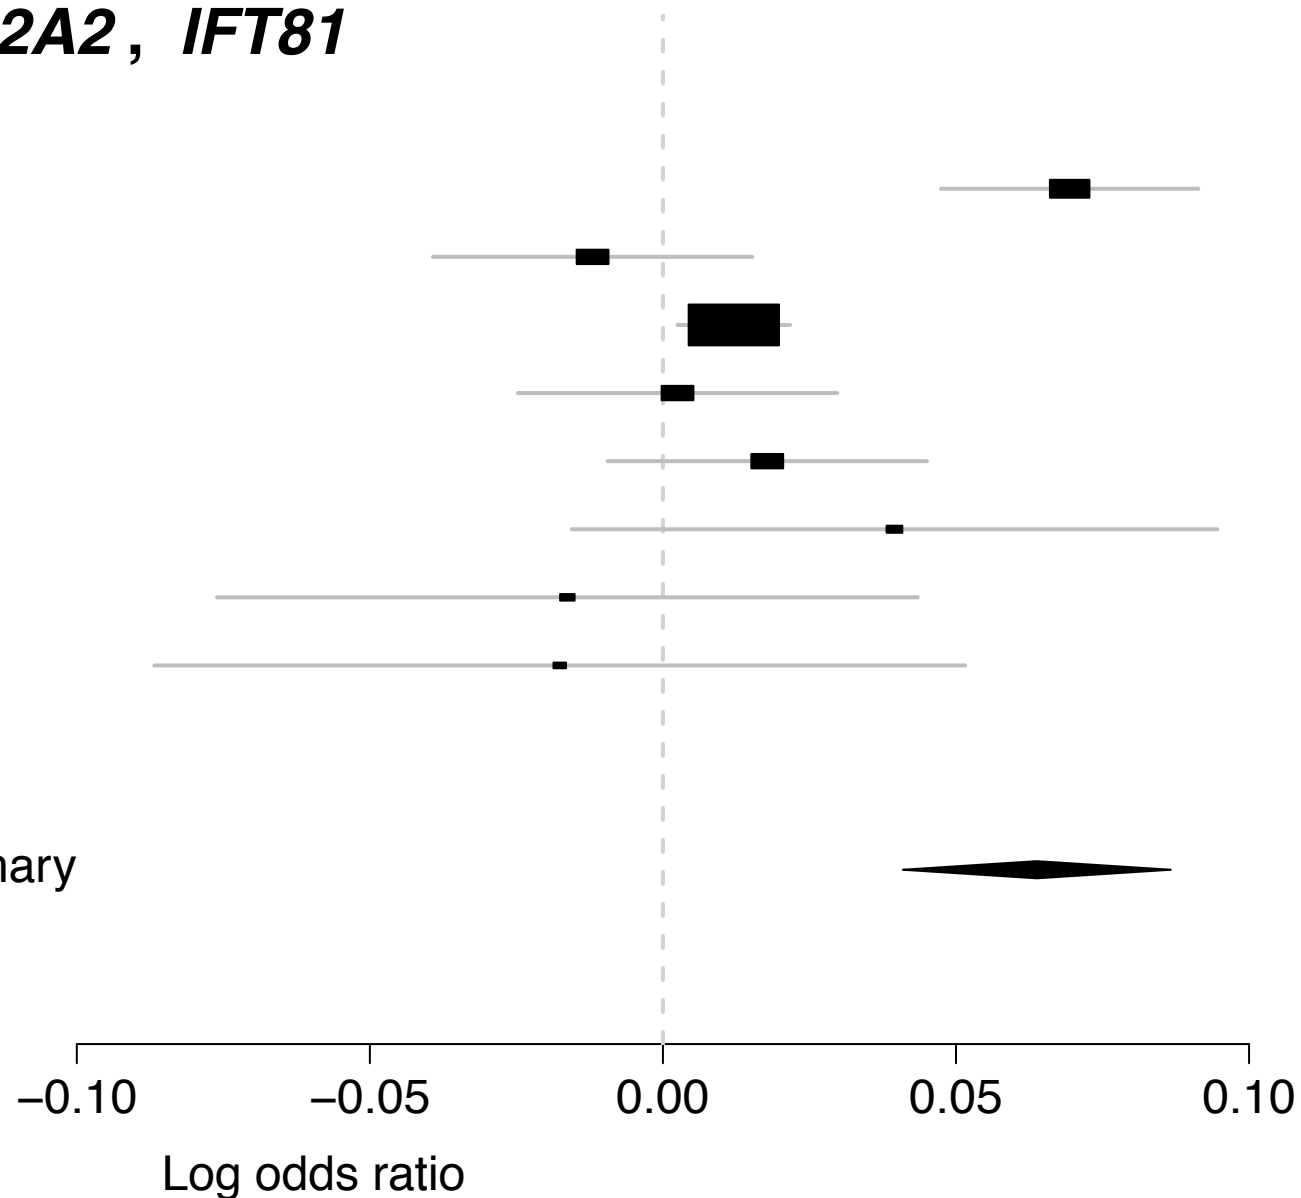

PM-Plot

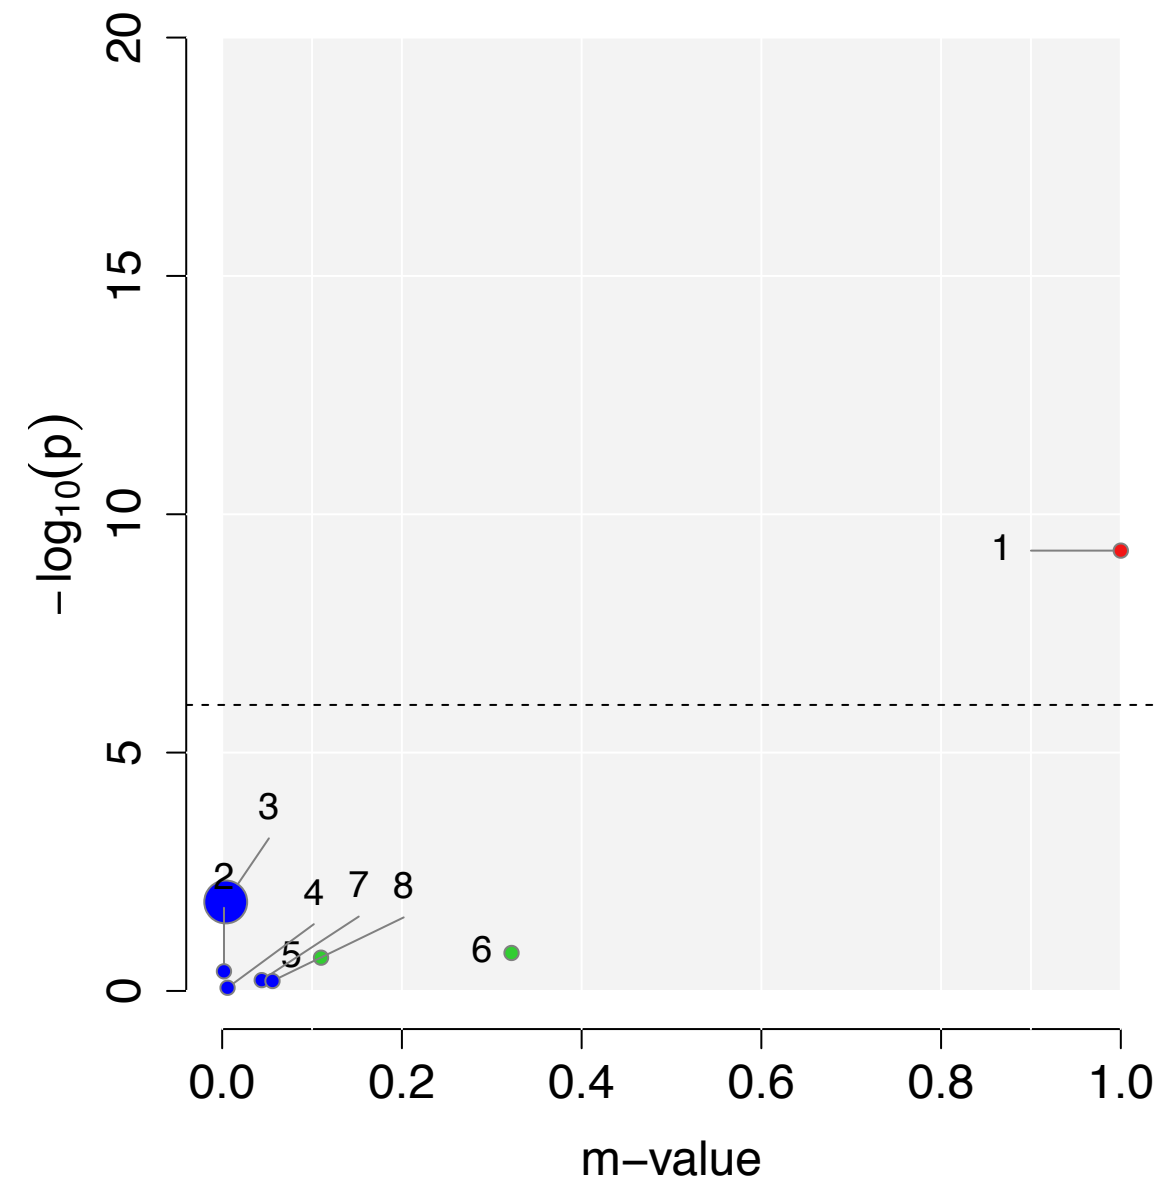

rs4906364 (Meta  $P = 2.7e \times 10^{-12}$ )

Gene : *PPP1R13B*, *ZFYVE21*

GWAS P-value

- 1.88 x 10<sup>-12</sup> ● 1.SCZ
- 1.06 x 10<sup>-5</sup> ● 2.BIP
- 0.1525 ● 3.MD
- 0.0688 ● 4.ASD
- 0.8483 ● 5.ADHD
- 0.3123 ● 6.TS
- 0.3724 ● 7.ANO
- 0.3567 ● 8.OCD

FE summary

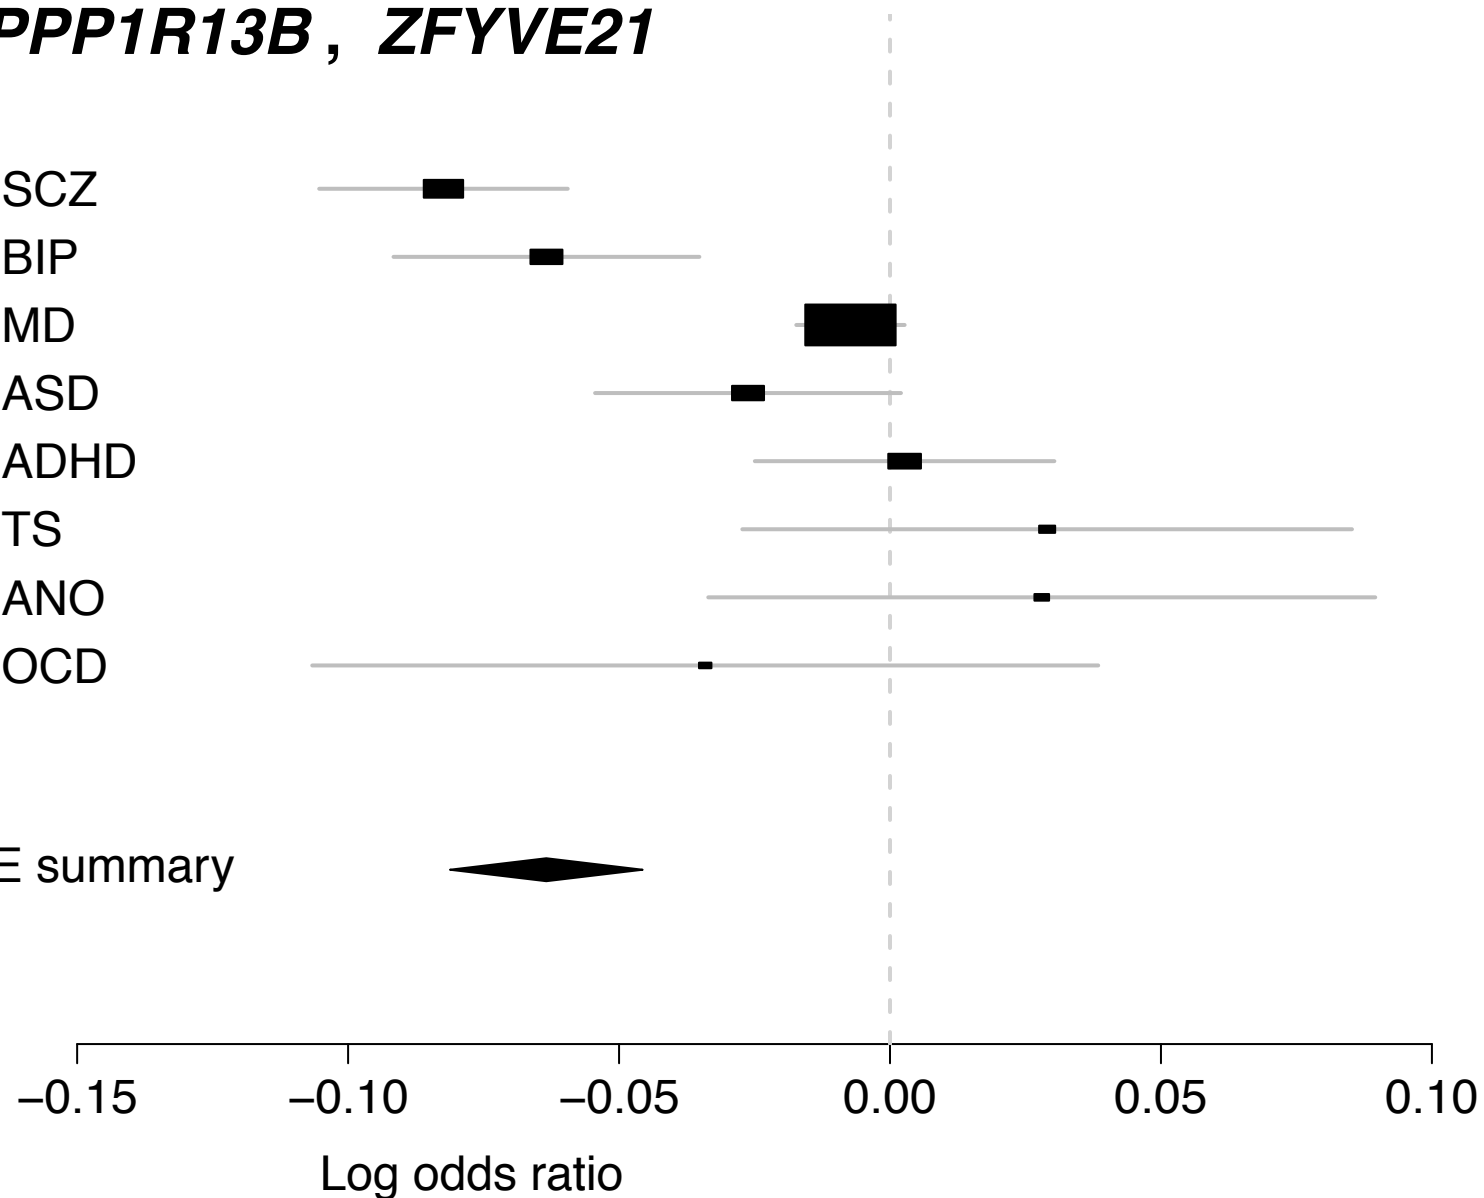

PM-Plot

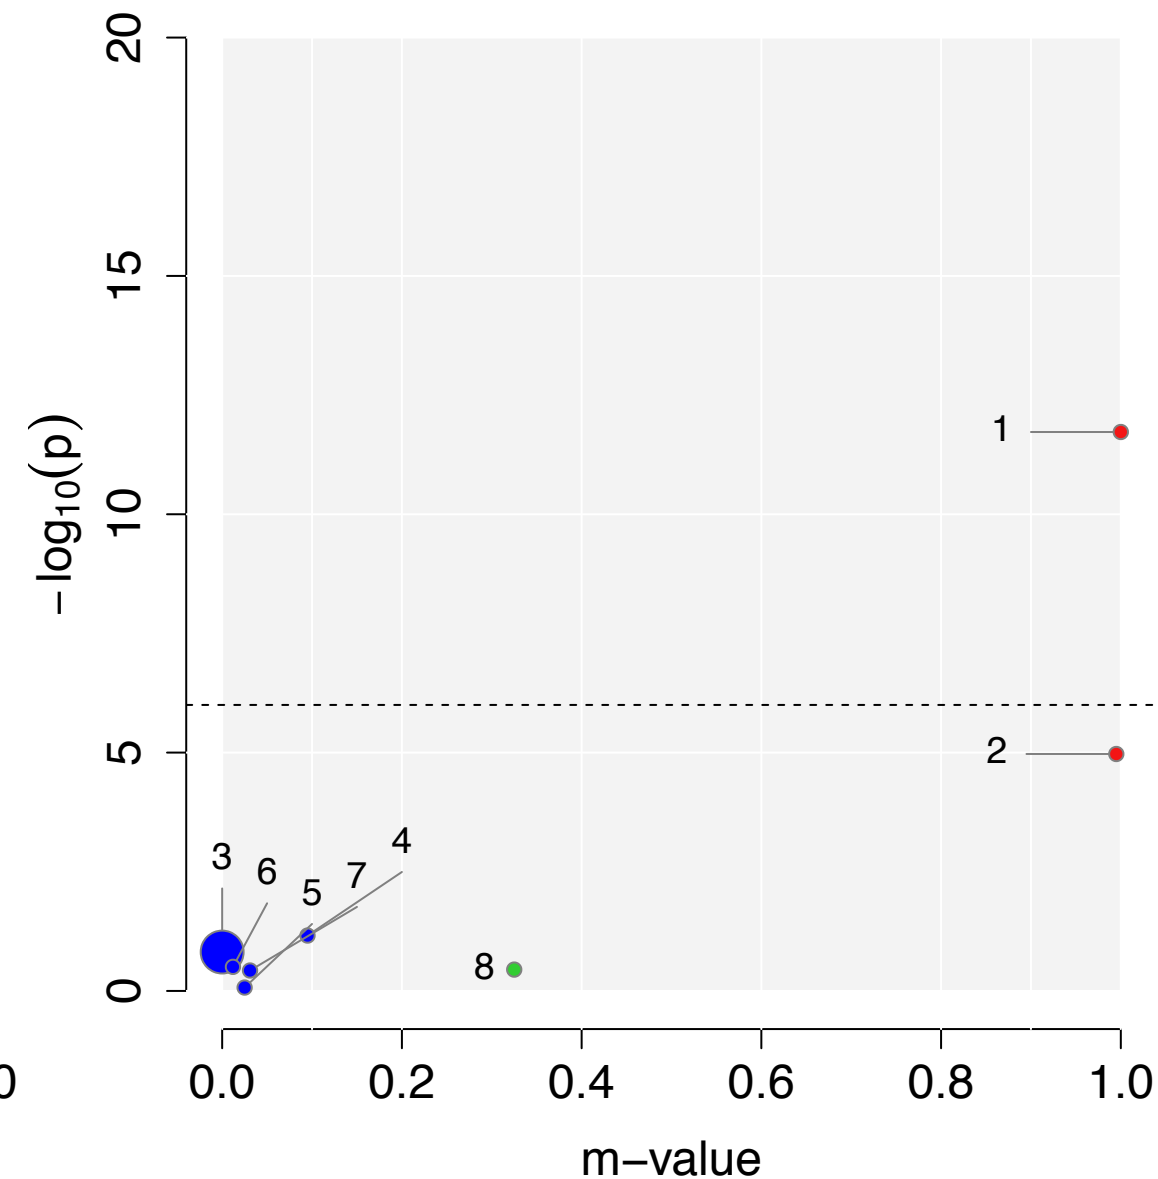

# rs4916723 (Meta $P = 1.82 \times 10^{-9}$ )

Gene : (>200kb)

## GWAS P-value

- 0.5189 ● 1.SCZ
- 0.5712 ● 2.BIP
- 0.0551 ● 3.MD
- $1.81 \times 10^{-6}$  ● 4.ASD
- $1.72 \times 10^{-8}$  ● 5.ADHD
- 0.0299 ● 6.TS
- 0.6183 ● 7.ANO
- 0.4349 ● 8.OCD

FE summary

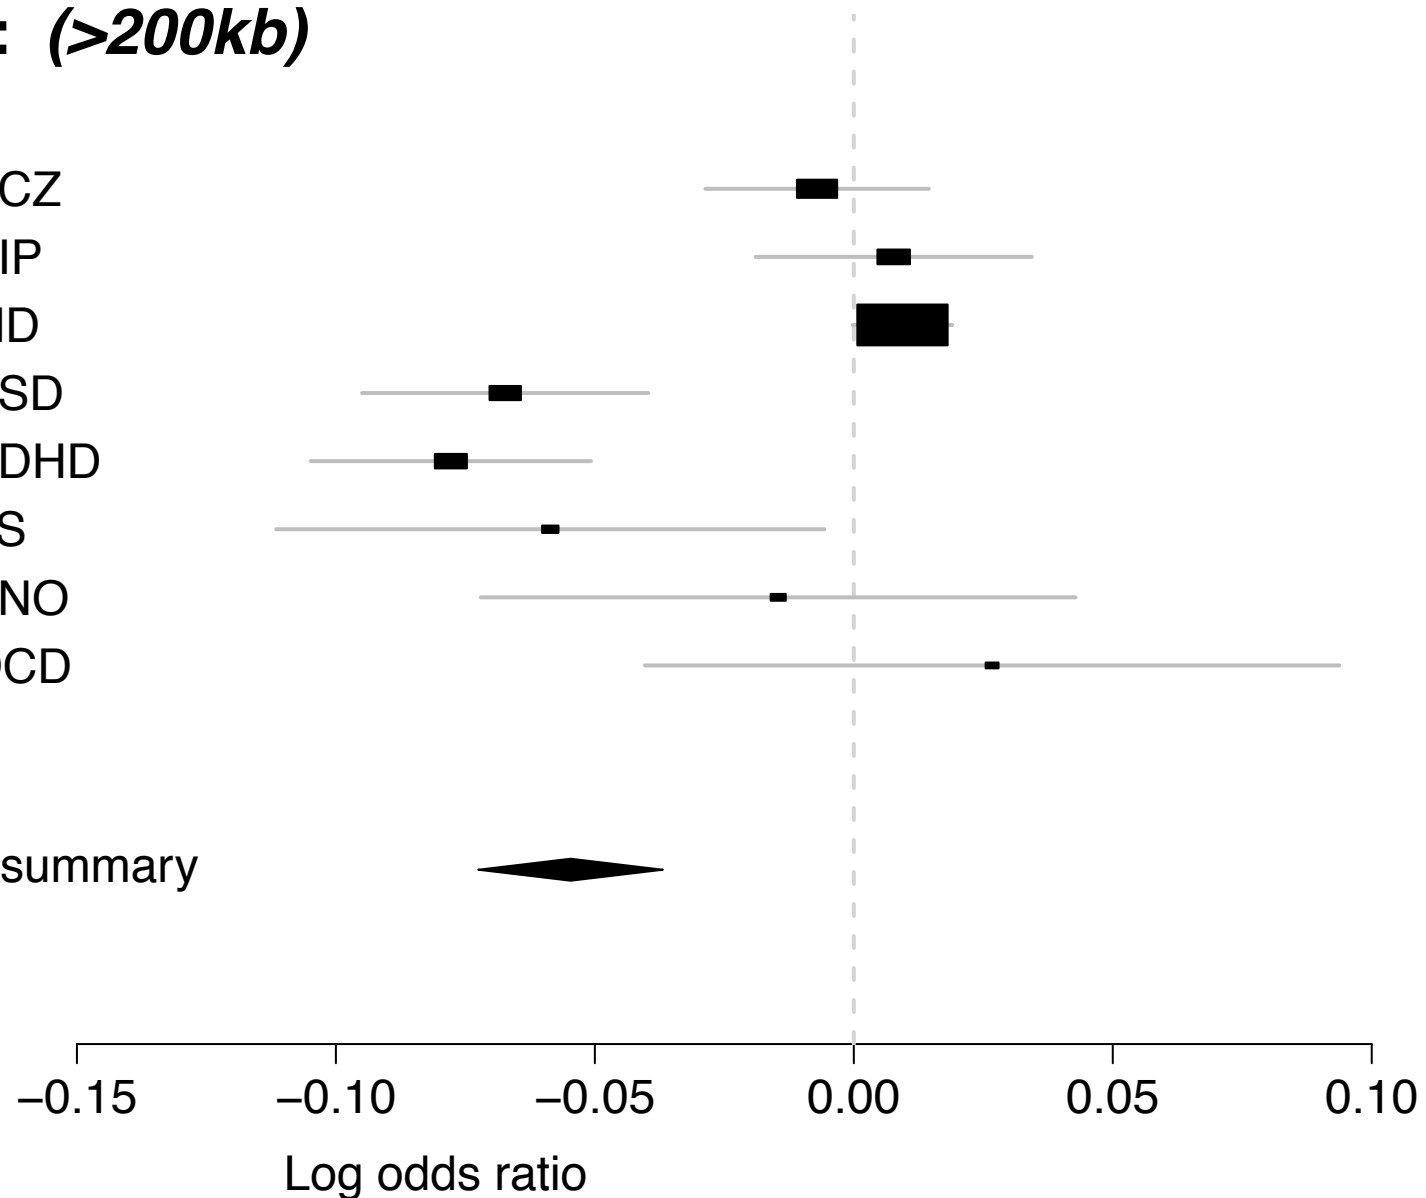

## PM-Plot

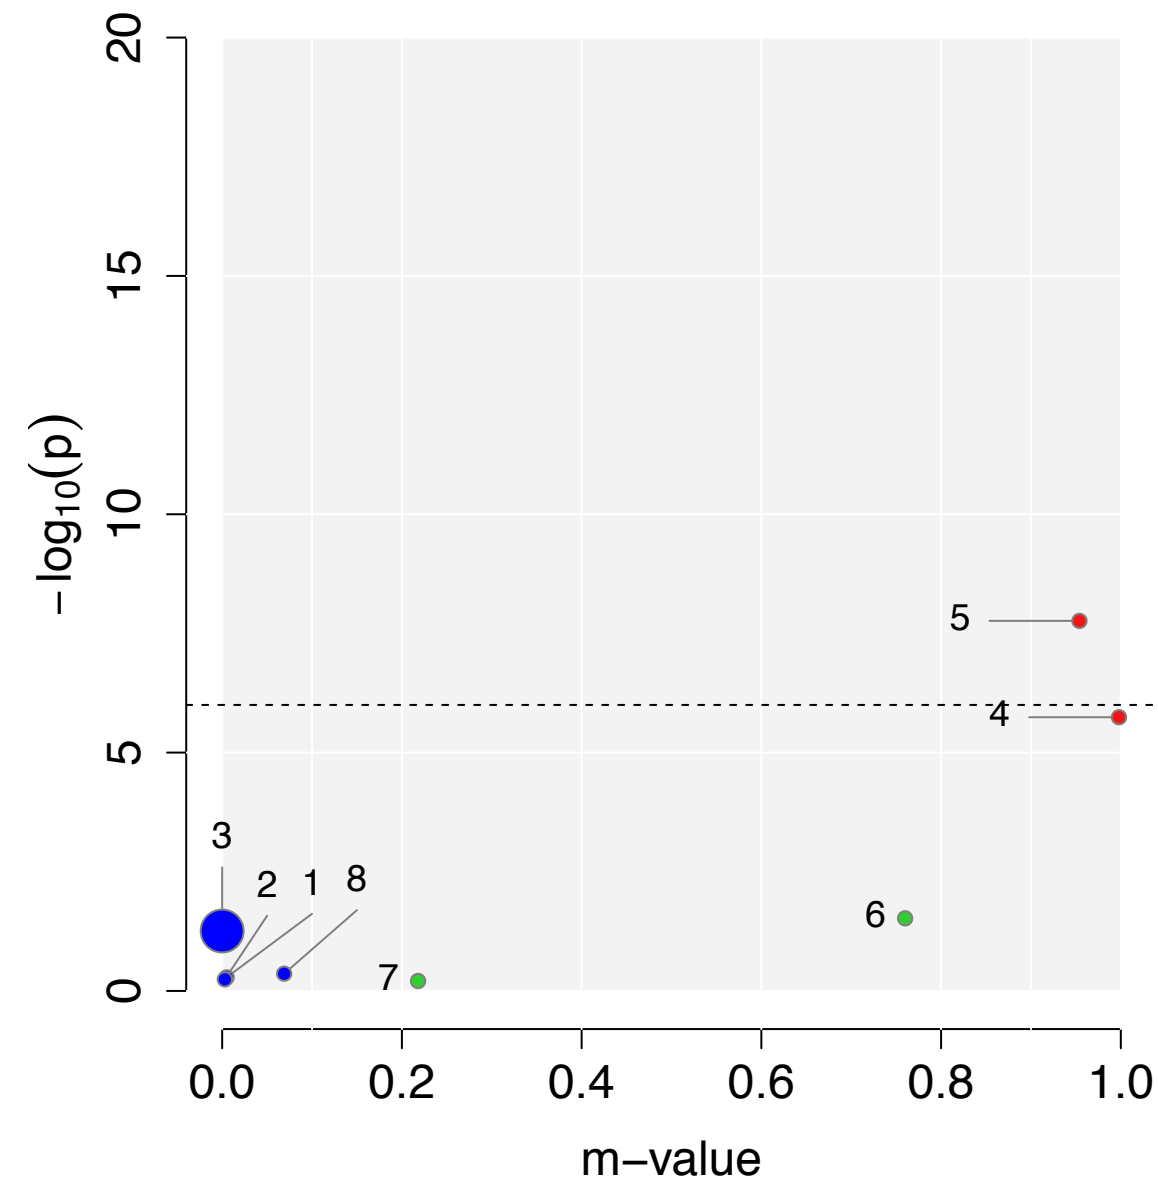

rs5757717 (Meta  $P = 9.07 \times 10^{-11}$ )

Gene : *RPS19BP1*, *ATF4*

GWAS P-value

- 4.15 x 10<sup>-10</sup> ● 1.SCZ
- 0.0267 ● 2.BIP
- 0.9203 ● 3.MD
- 0.3036 ● 4.ASD
- 0.9265 ● 5.ADHD
- 0.2524 ● 6.TS
- 0.8046 ● 7.ANO
- 2.83 x 10<sup>-5</sup> ● 8.OCD

FE summary

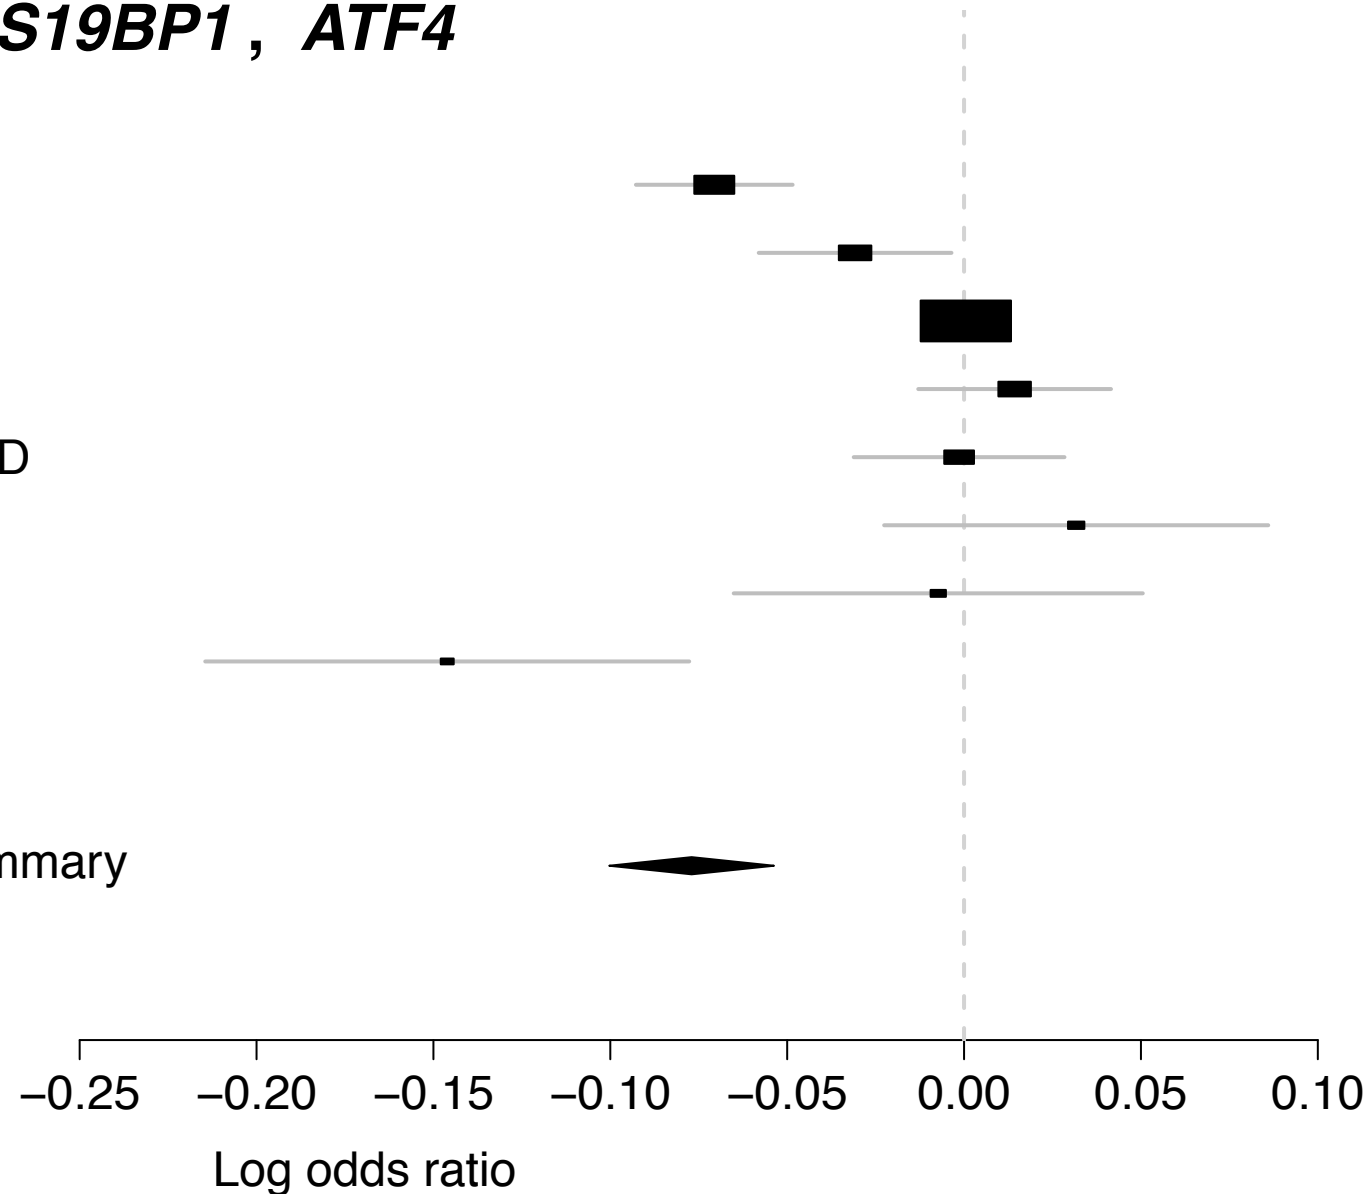

PM-Plot

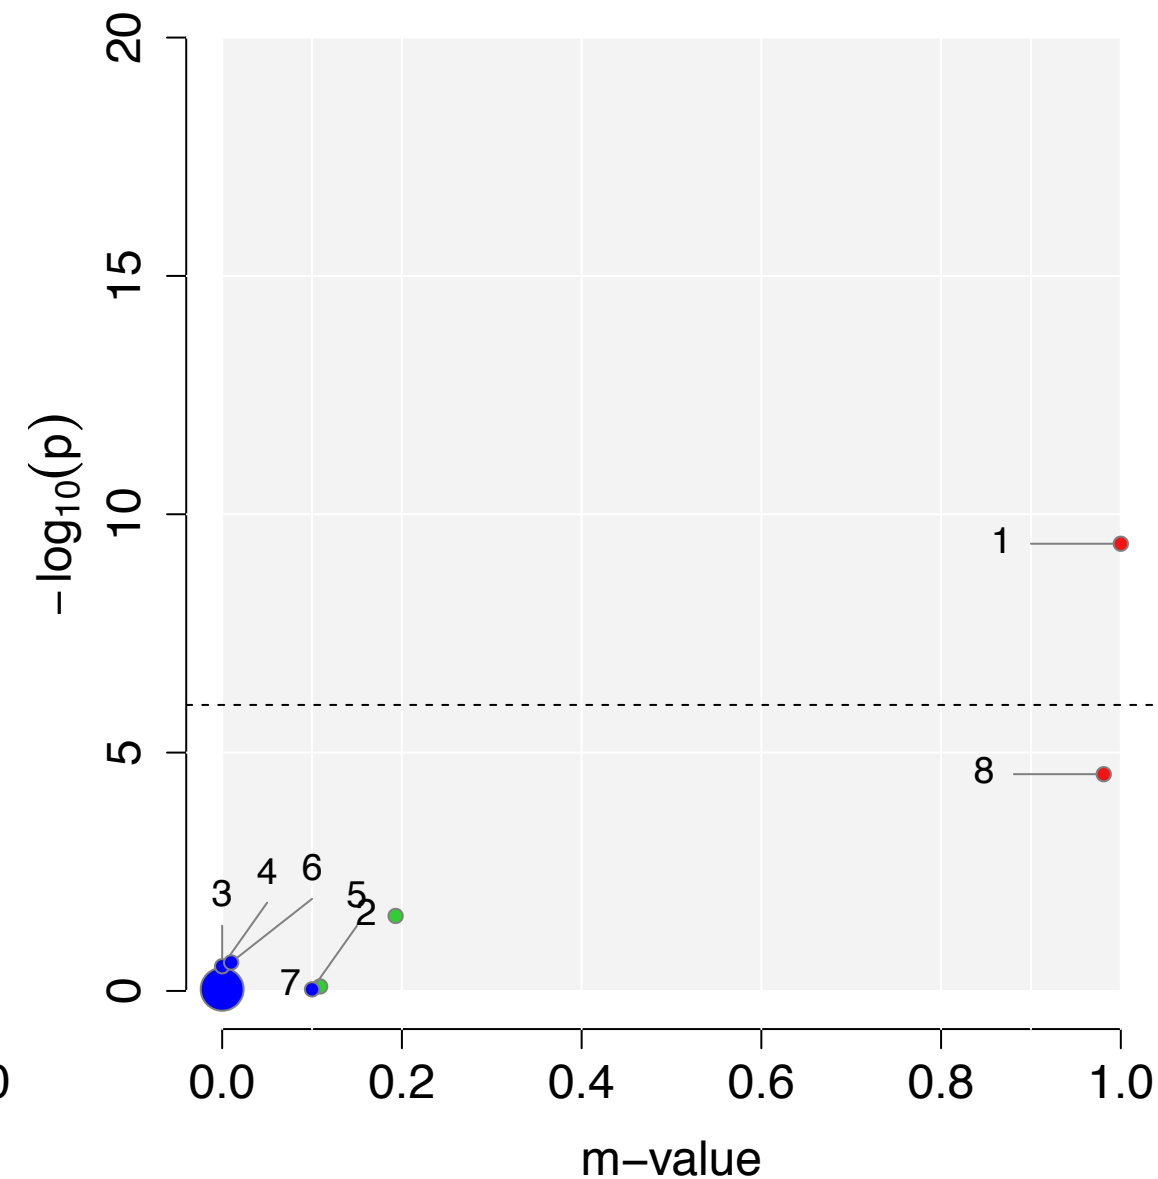



rs5758265 (Meta  $P = 5.36 \times 10^{-14}$ )

Gene : *L3MBTL2*, *CHADL*

GWAS P-value

- 1.08 x 10<sup>-9</sup> ● 1.SCZ
- 0.1263 ● 2.BIP
- 9.38 x 10<sup>-9</sup> ● 3.MD
- 0.1200 ● 4.ASD
- 0.8850 ● 5.ADHD
- 0.0024 ● 6.TS
- 0.2123 ● 7.ANO
- 0.0945 ● 8.OCD

FE summary

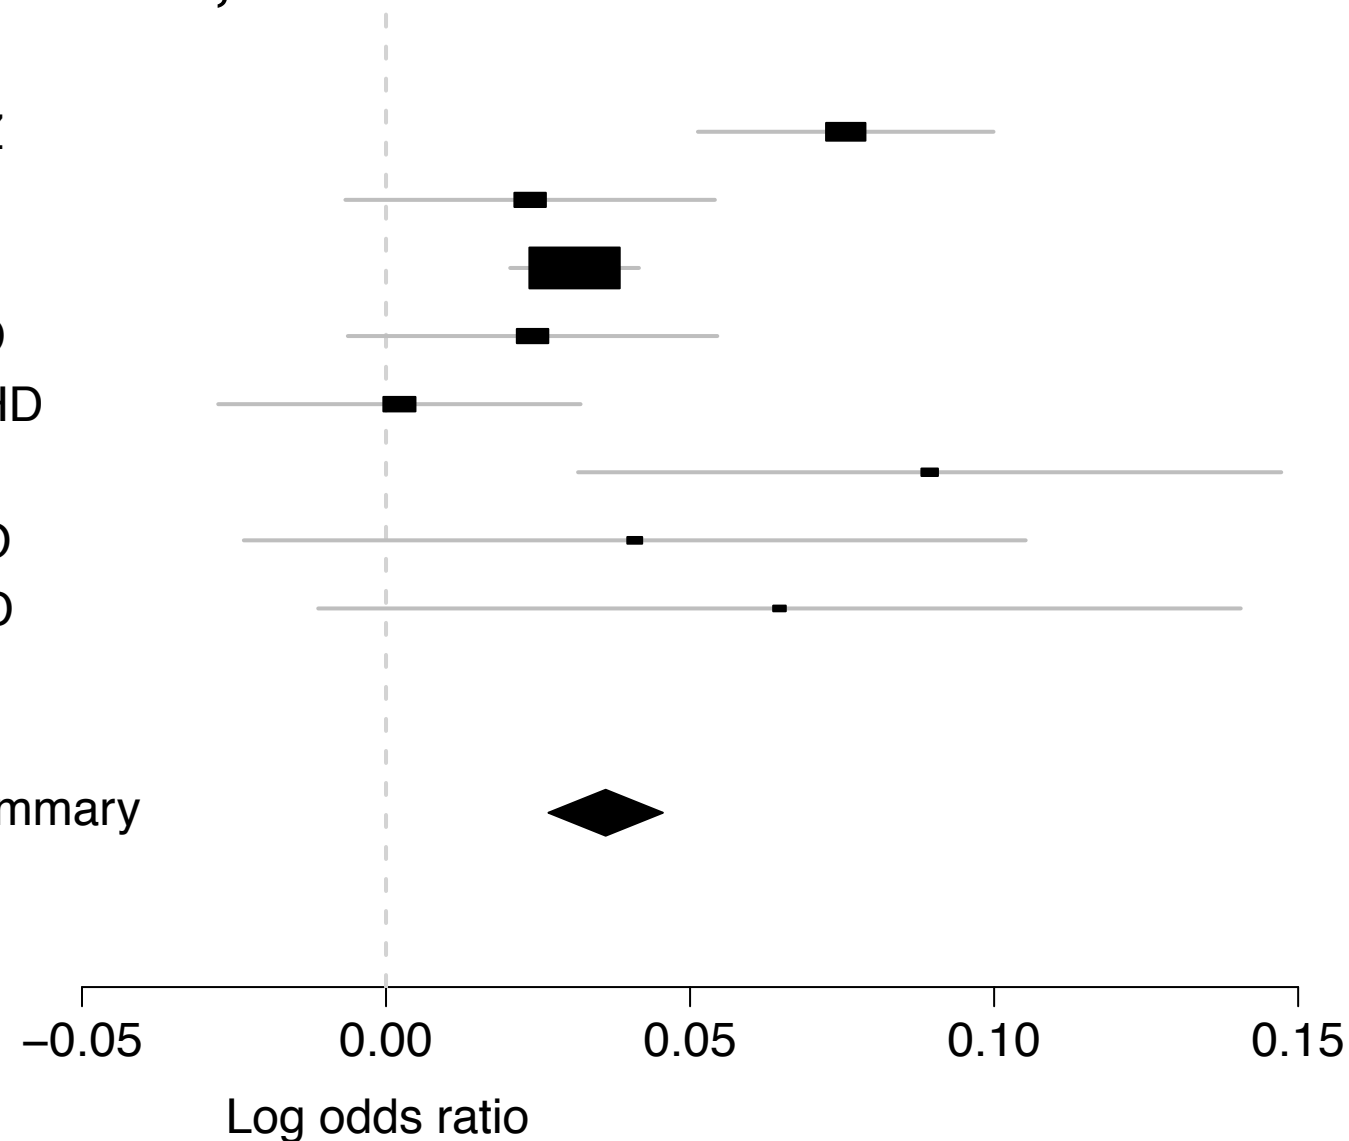

PM-Plot

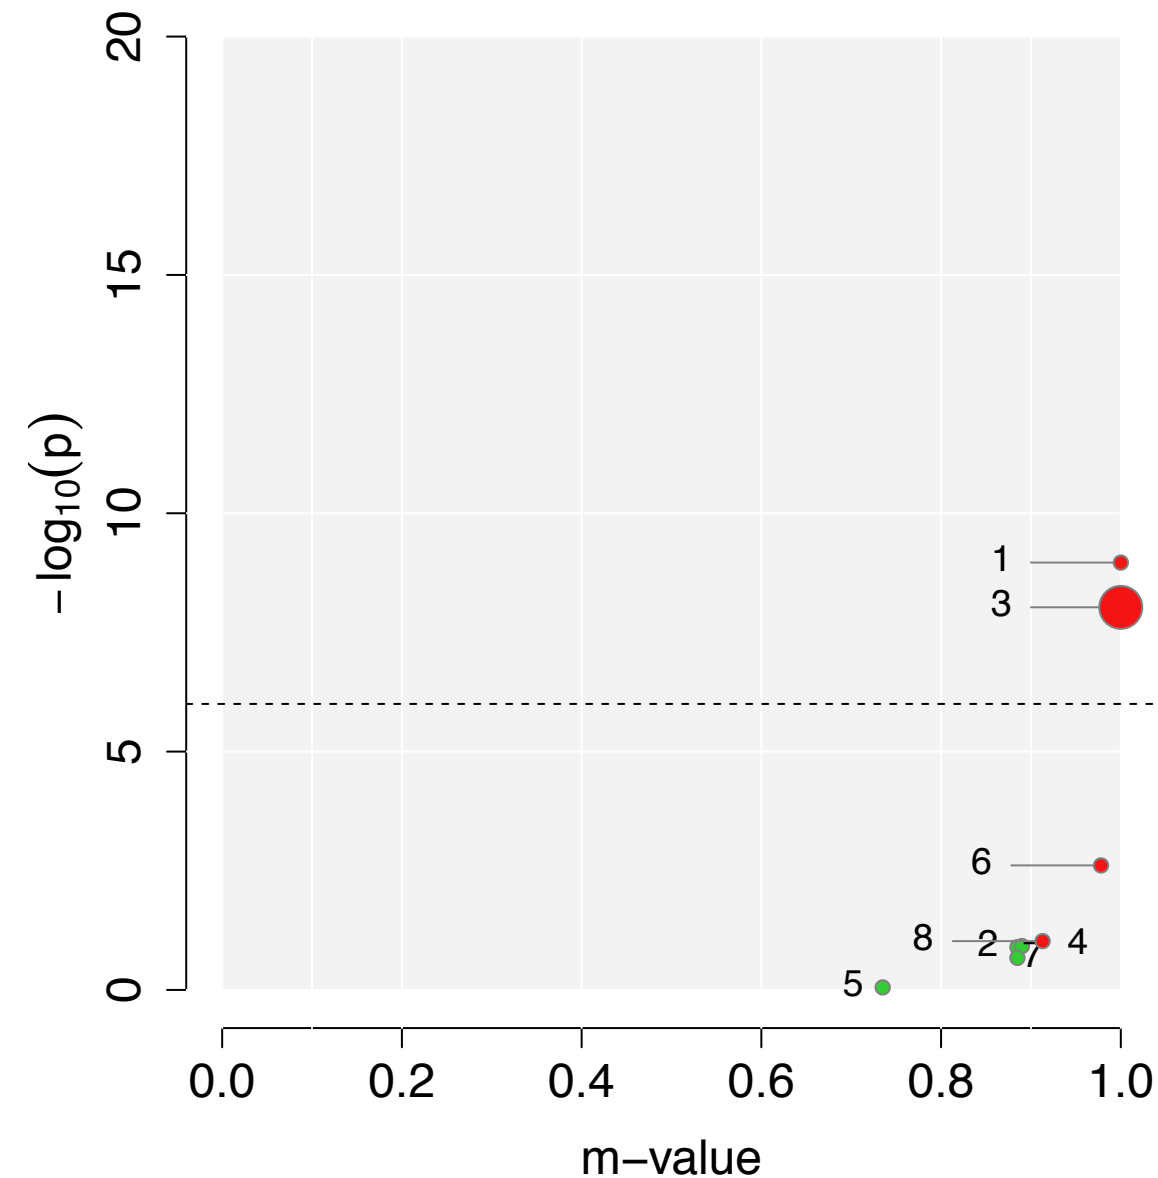

# rs6047287 (Meta $P = 2.72 \times 10^{-10}$ )

Gene : *KIZ*

## GWAS P-value

- 0.0001 ● 1.SCZ
- 0.5957 ● 2.BIP
- 0.5504 ● 3.MD
- $7.86 \times 10^{-8}$  ● 4.ASD
- $1.97 \times 10^{-5}$  ● 5.ADHD
- 0.7143 ● 6.TS
- 0.6429 ● 7.ANO
- 0.0431 ● 8.OCD

FE summary

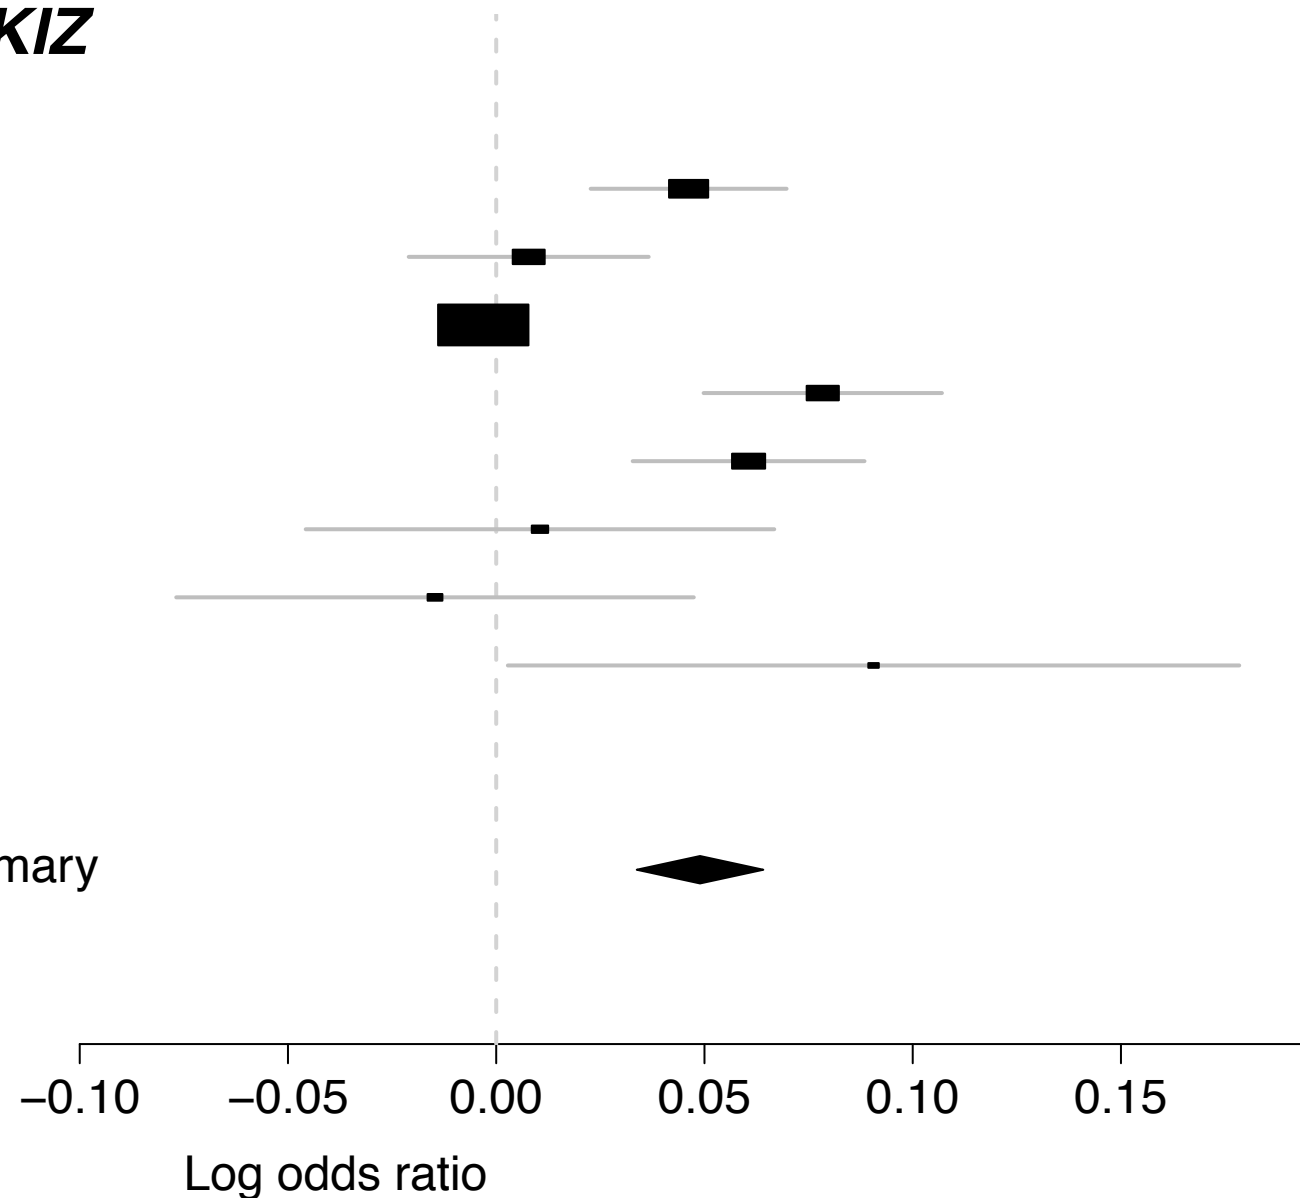

## PM-Plot

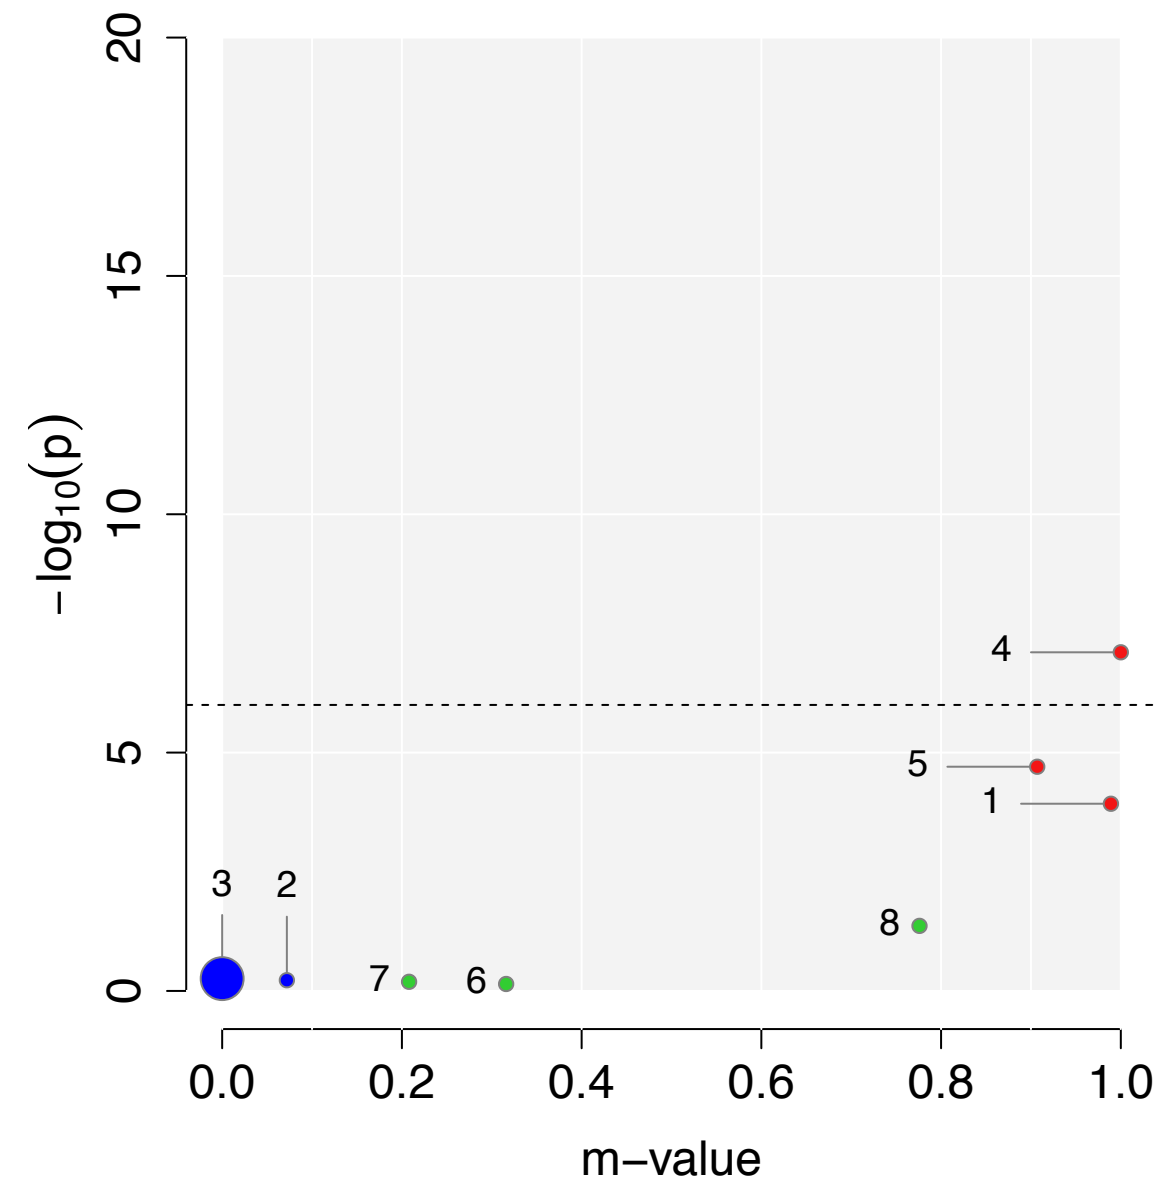

# rs6125656 (Meta $P = 2.81 \times 10^{-9}$ )

Gene : *KCNB1*, *PTGIS*

## GWAS P-value

- $5.73 \times 10^{-6}$  ● 1.SCZ
- $7.16 \times 10^{-5}$  ● 2.BIP
- $5.91 \times 10^{-5}$  ● 3.MD
- 0.0009 ● 4.ASD
- 0.6943 ● 5.ADHD
- 0.7689 ● 6.TS
- 0.1187 ● 7.ANO
- 0.6954 ● 8.OCD

FE summary

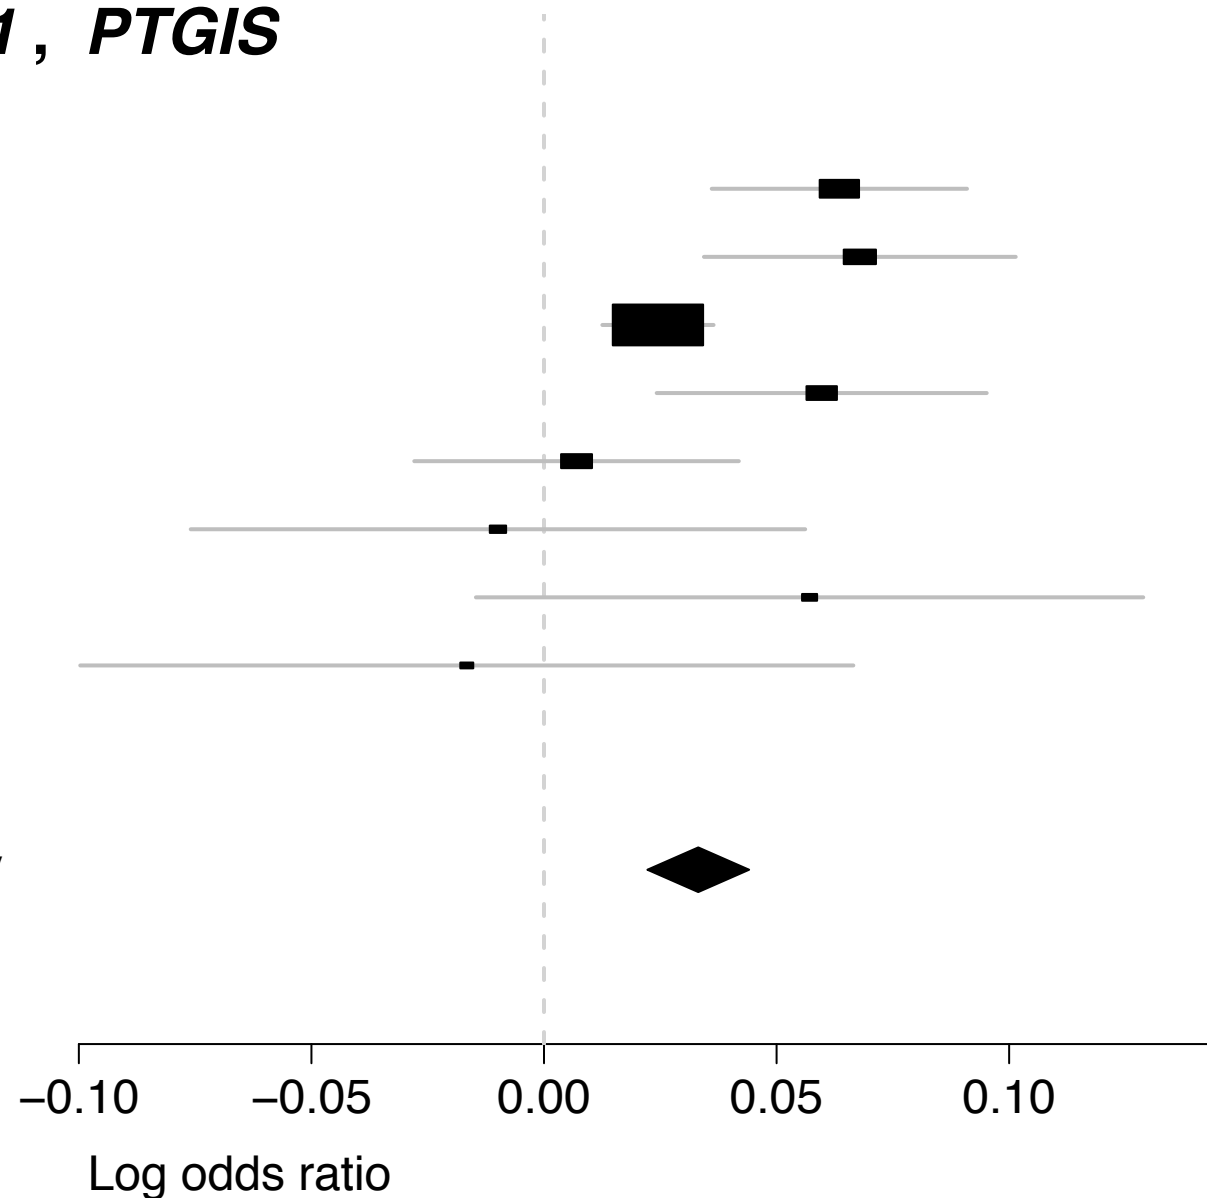

## PM-Plot

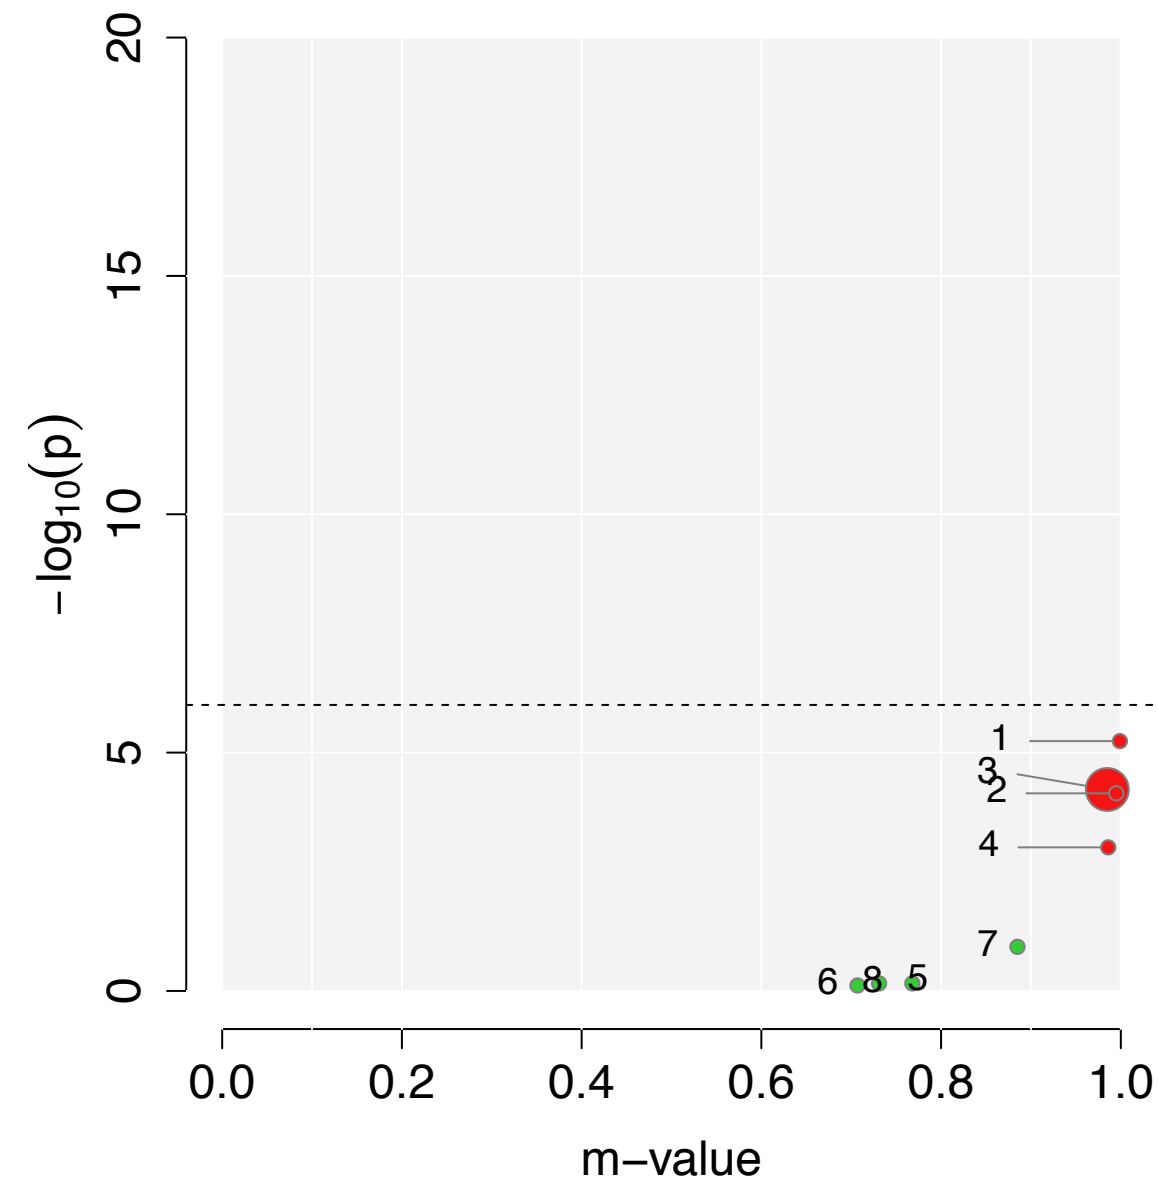

# rs6471814 (Meta $P = 1.77 \times 10^{-8}$ )

Gene : (>200kb)

## GWAS P-value

- 2.25 x 10<sup>-8</sup> ● 1.SCZ
- 0.0693 ● 2.BIP
- 0.0107 ● 3.MD
- 0.7389 ● 4.ASD
- 0.2374 ● 5.ADHD
- 0.2374 ● 6.TS
- 0.0128 ● 7.ANO
- 0.0195 ● 8.OCD

FE summary

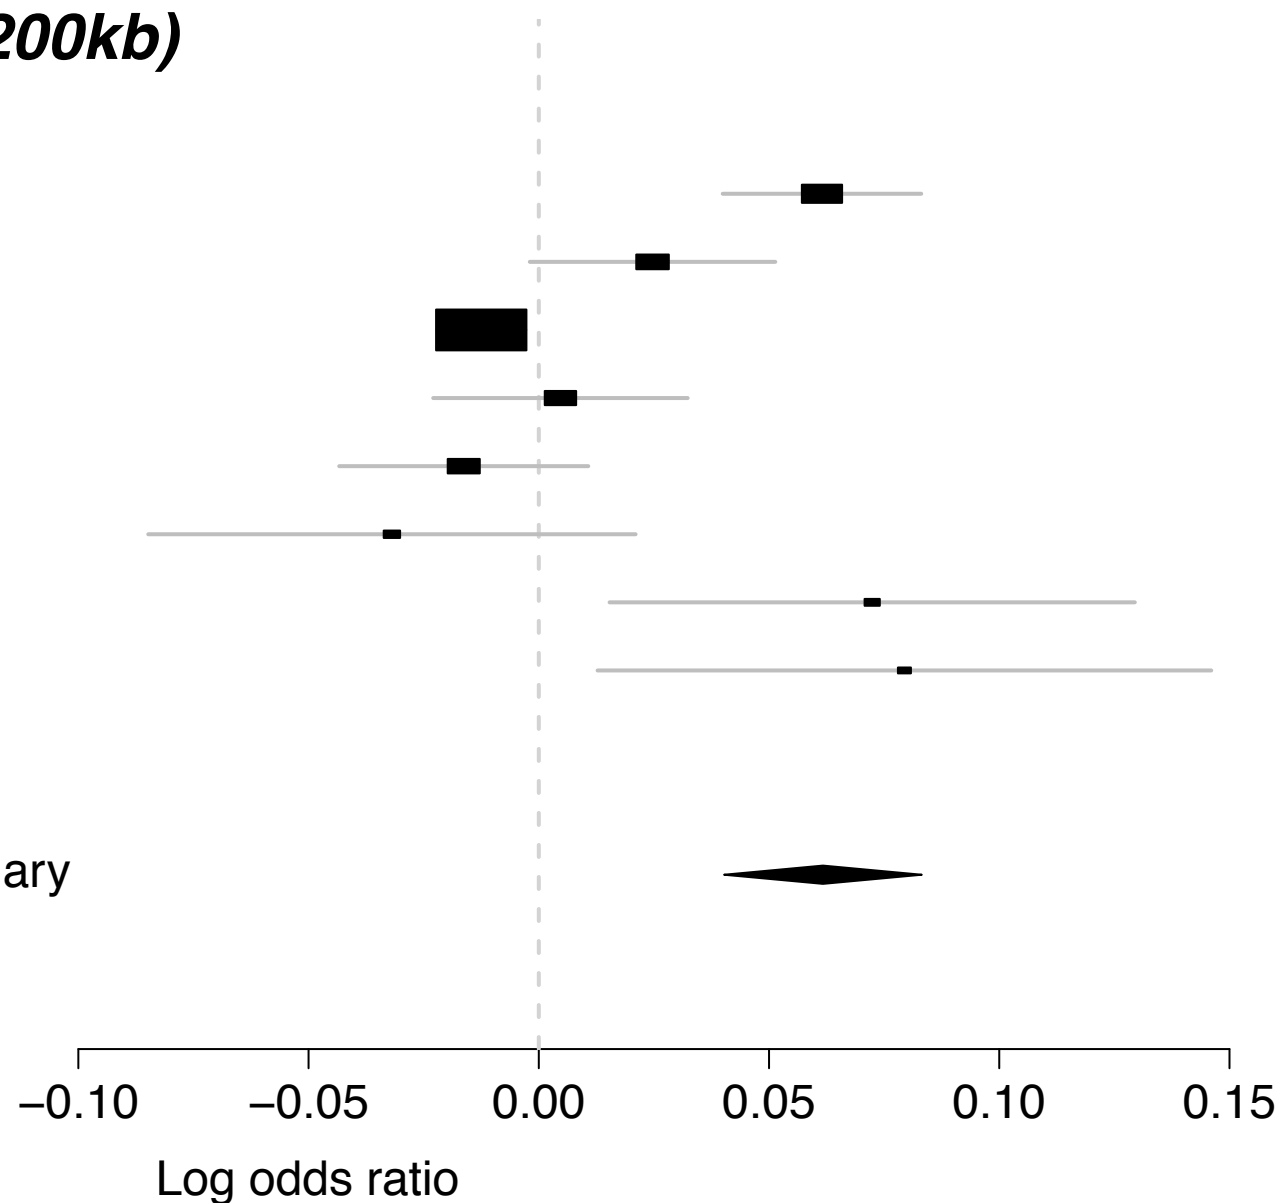

## PM-Plot

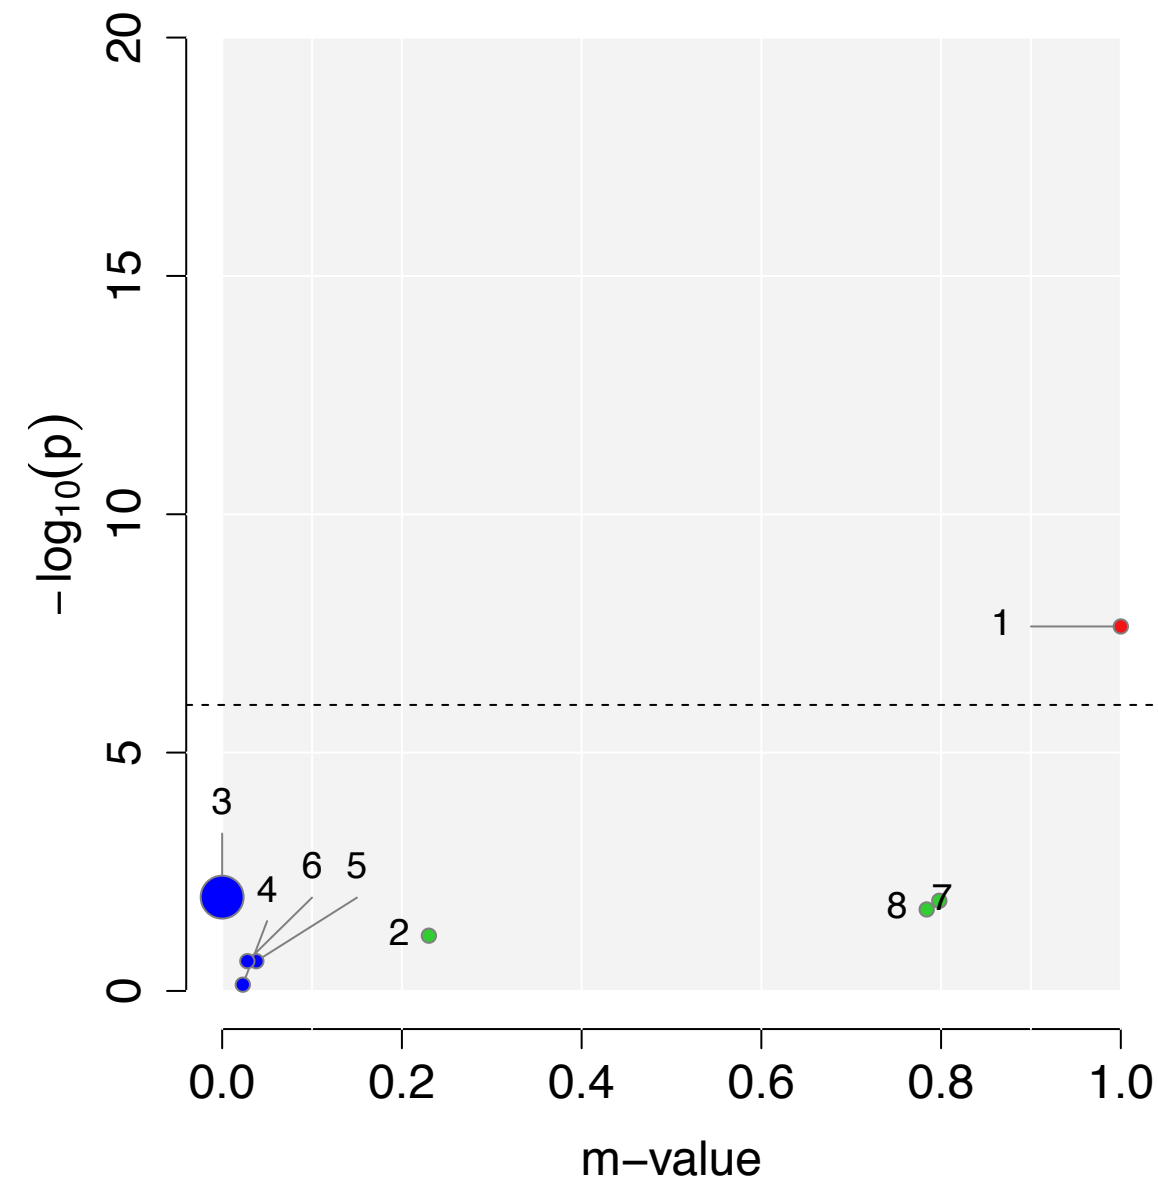

# rs6694545 (Meta $P = 4.19 \times 10^{-9}$ )

Gene : (>200kb)

## GWAS P-value

- 2.39 x 10<sup>-9</sup> ● 1.SCZ
- 0.0002 ● 2.BIP
- 0.6175 ● 3.MD
- 0.9448 ● 4.ASD
- 0.3769 ● 5.ADHD
- 0.1217 ● 6.TS
- 0.1220 ● 7.ANO
- 0.9557 ● 8.OCD

FE summary

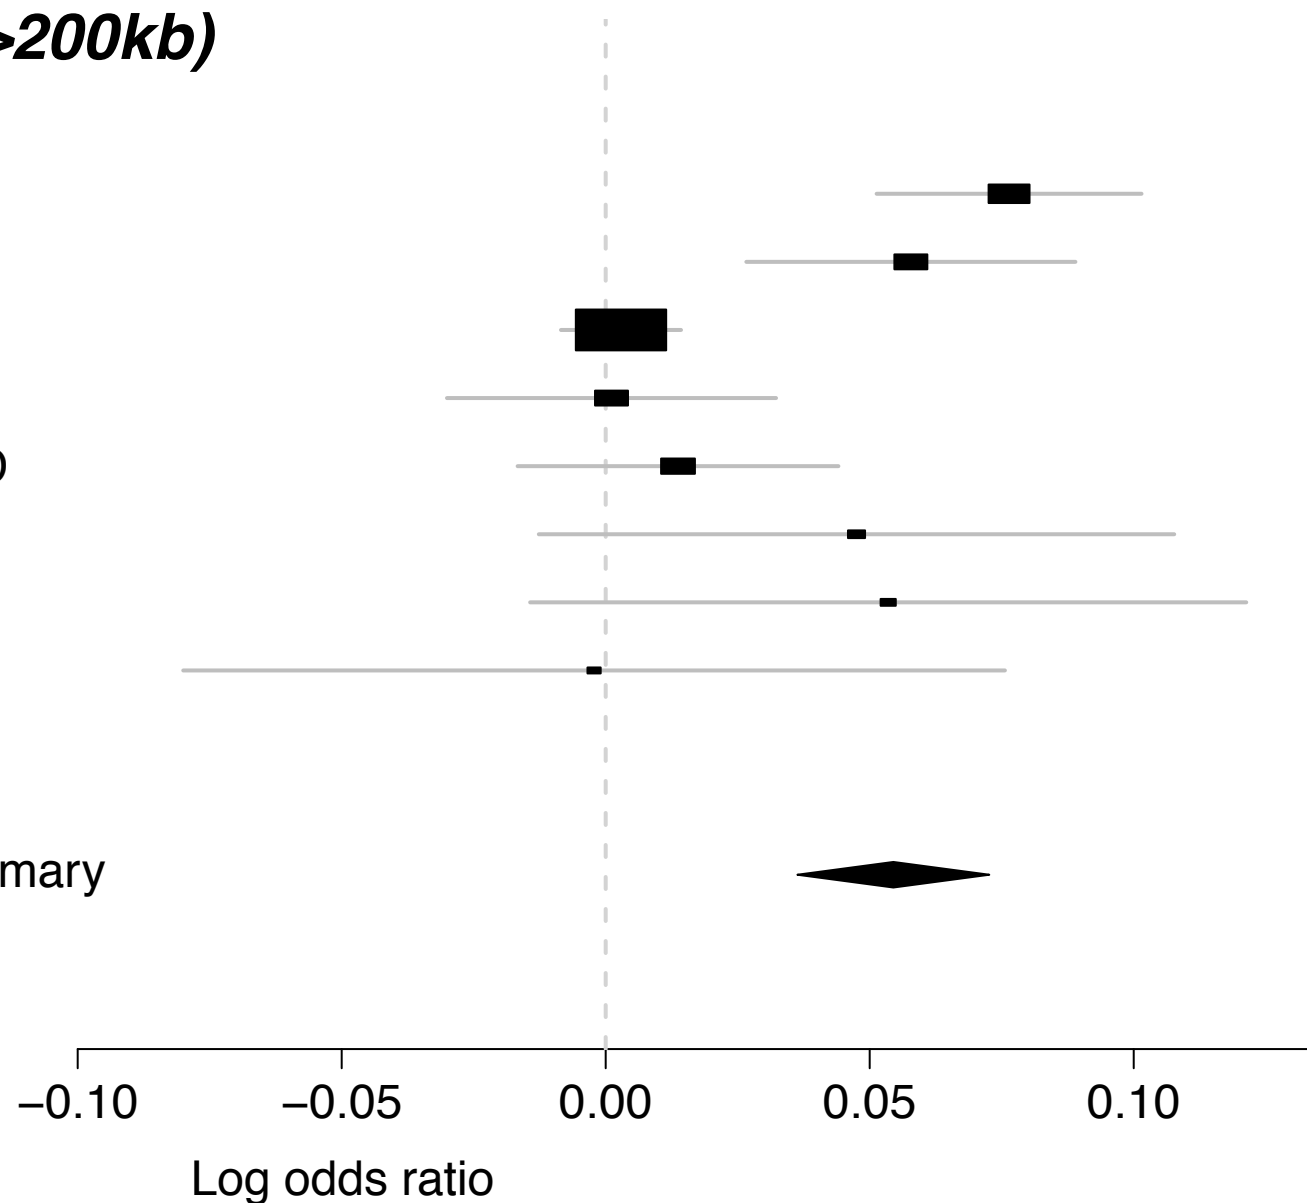

## PM-Plot

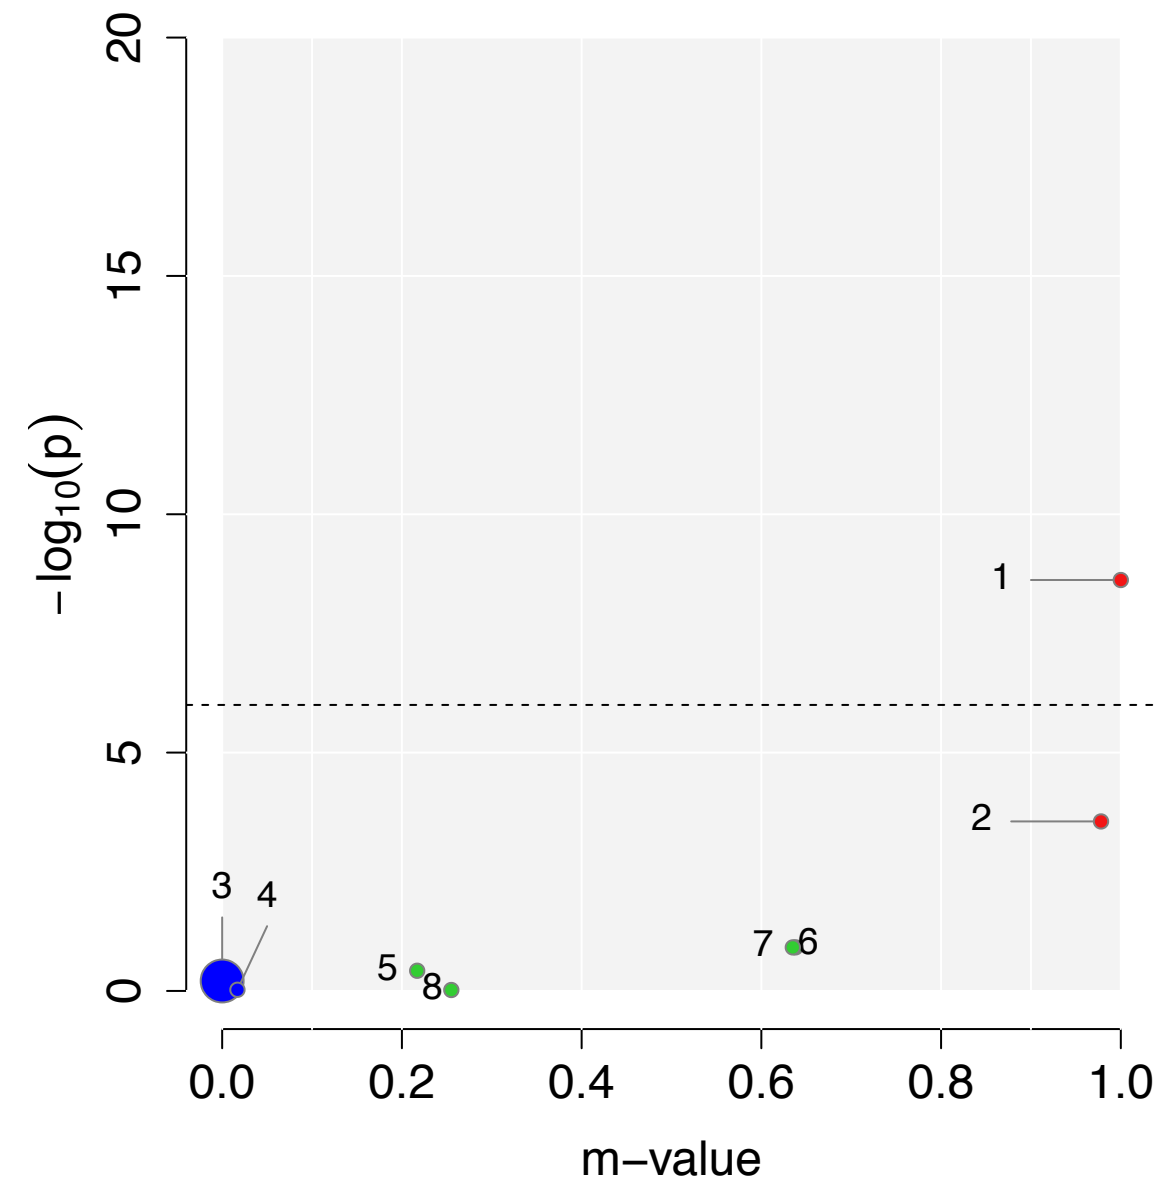

# rs6969410 (Meta $P = 4.65 \times 10^{-9}$ )

Gene : (>200kb)

## GWAS P-value

- $2.32 \times 10^{-6}$  ● 1.SCZ
- 0.0625 ● 2.BIP
- $1.29 \times 10^{-5}$  ● 3.MD
- 0.0013 ● 4.ASD
- 0.2185 ● 5.ADHD
- 0.7461 ● 6.TS
- 0.5971 ● 7.ANO
- 0.0458 ● 8.OCD

FE summary

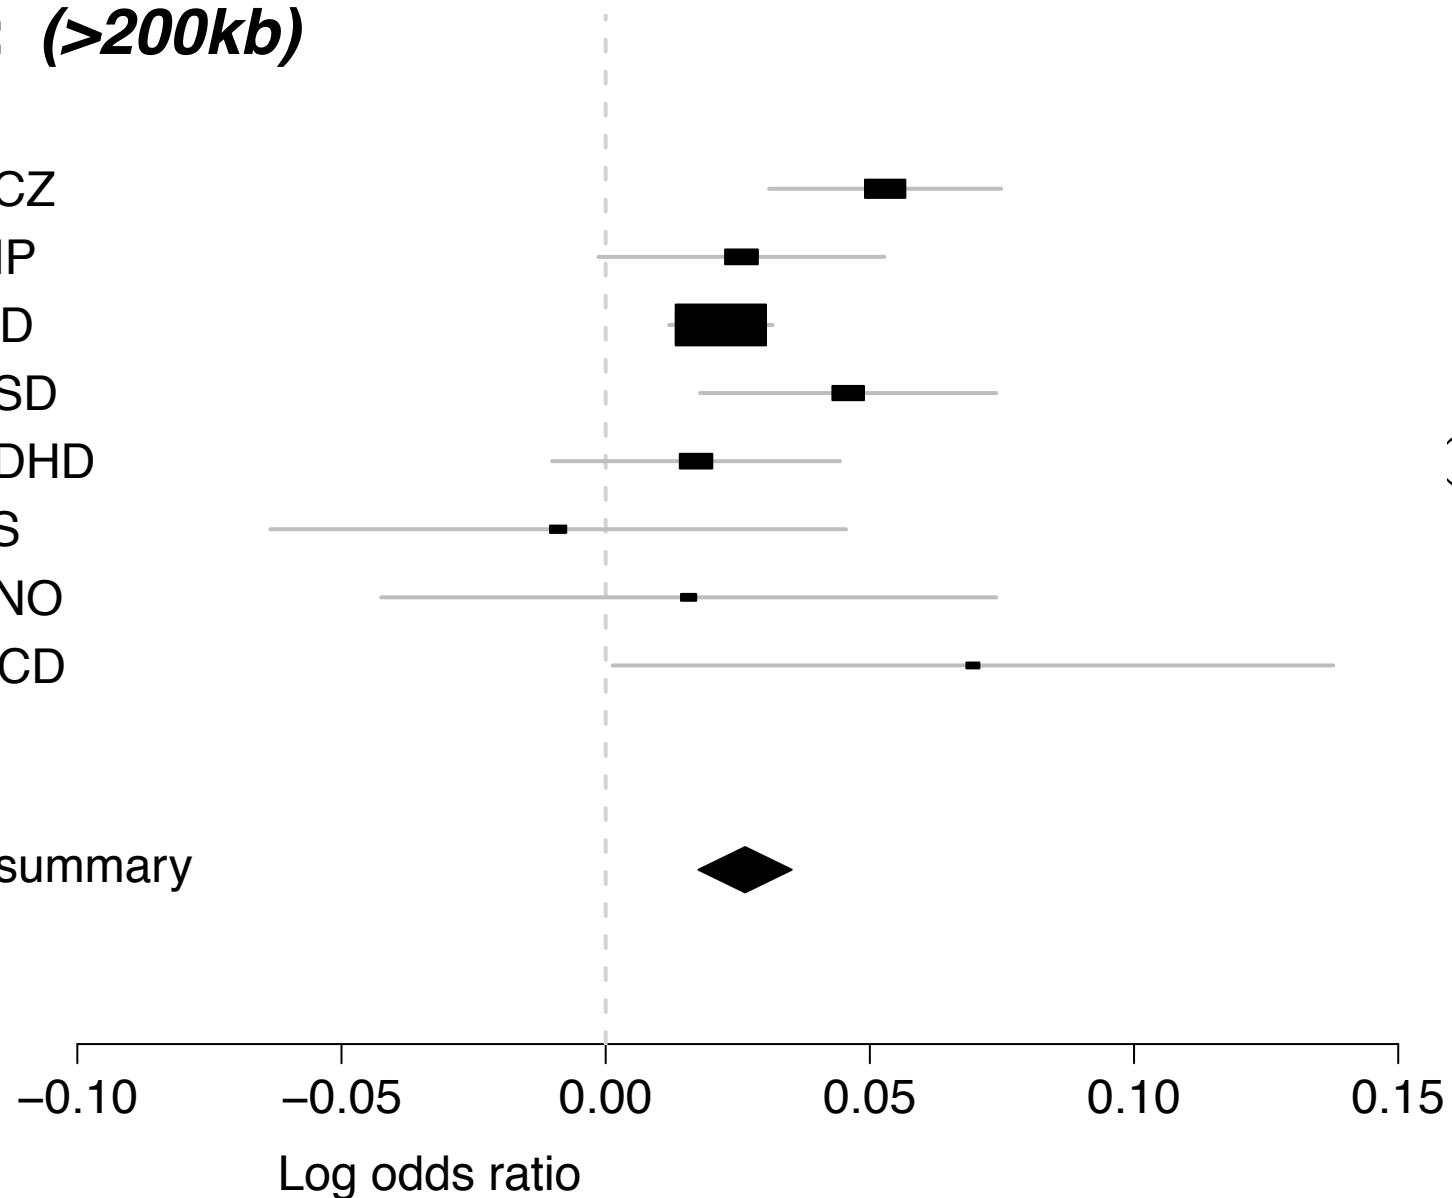

## PM-Plot

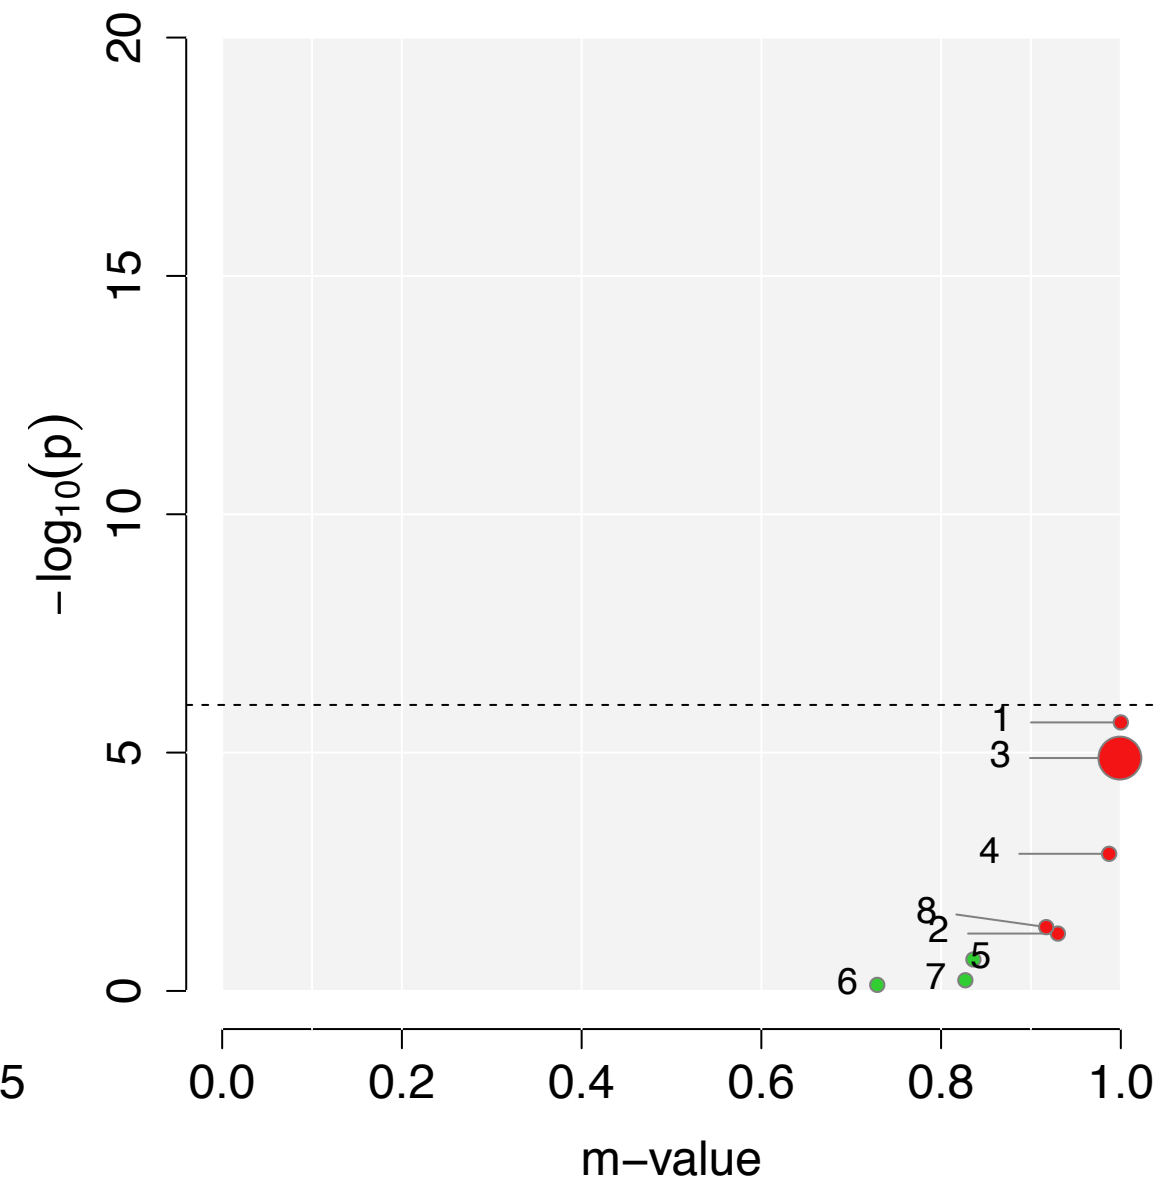

# rs7071123 (Meta $P = 9.78 \times 10^{-11}$ )

Gene : **CACNB2**

## GWAS P-value

- $3.10 \times 10^{-10}$  ● 1.SCZ
- 0.0001 ● 2.BIP
- 0.2756 ● 3.MD
- 0.0233 ● 4.ASD
- 0.3193 ● 5.ADHD
- 0.0440 ● 6.TS
- 0.4227 ● 7.ANO
- 0.7289 ● 8.OCD

FE summary

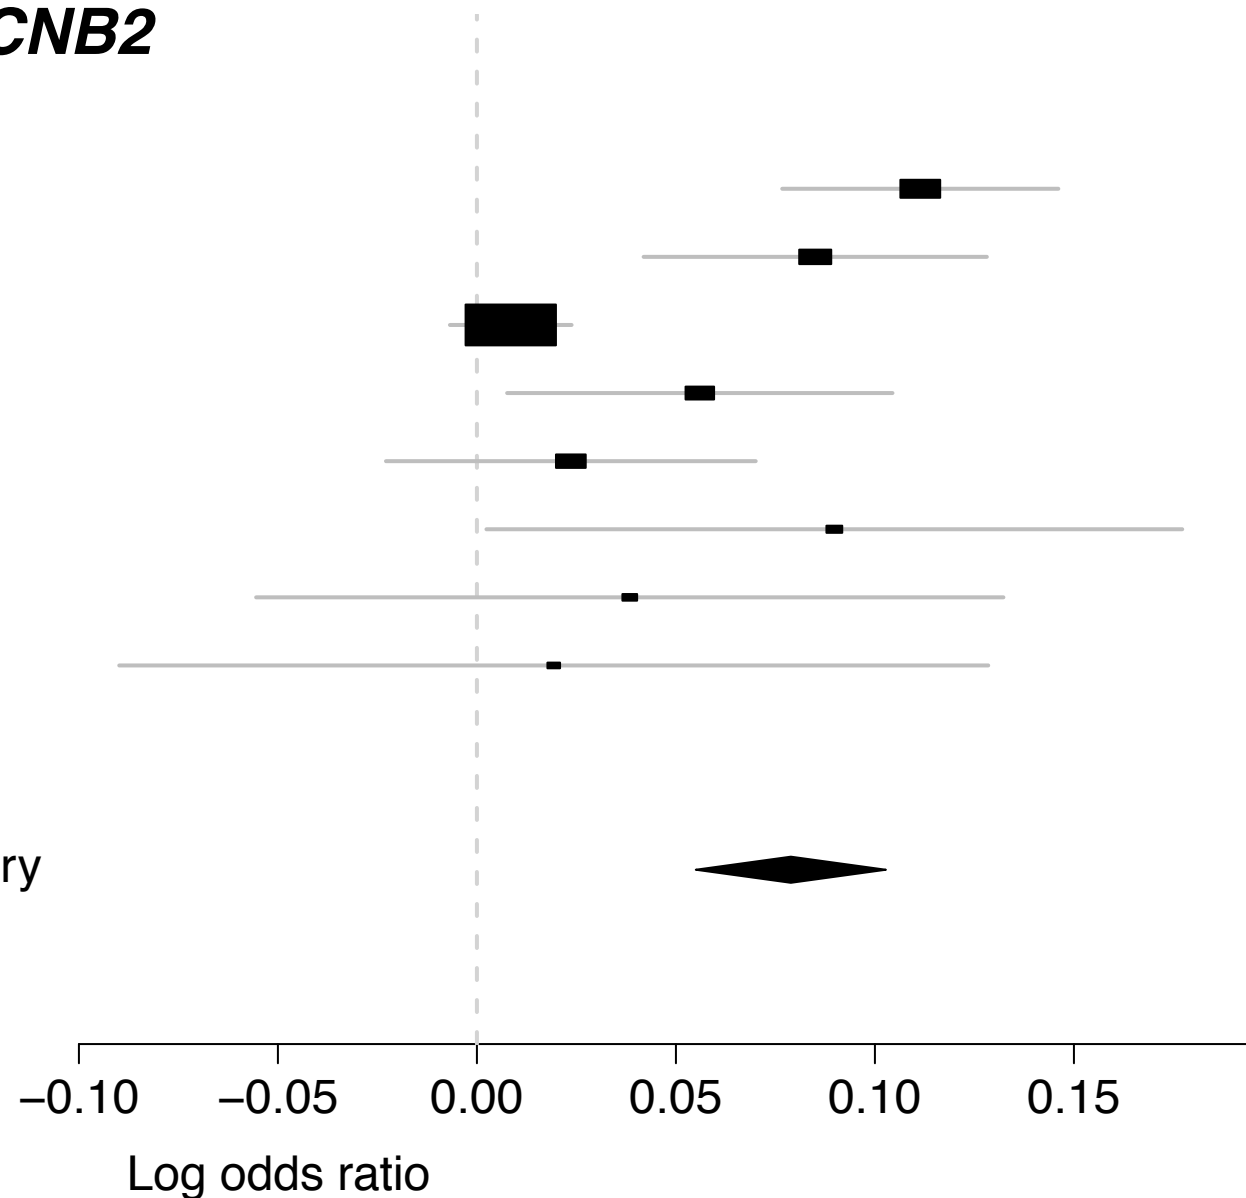

## PM-Plot

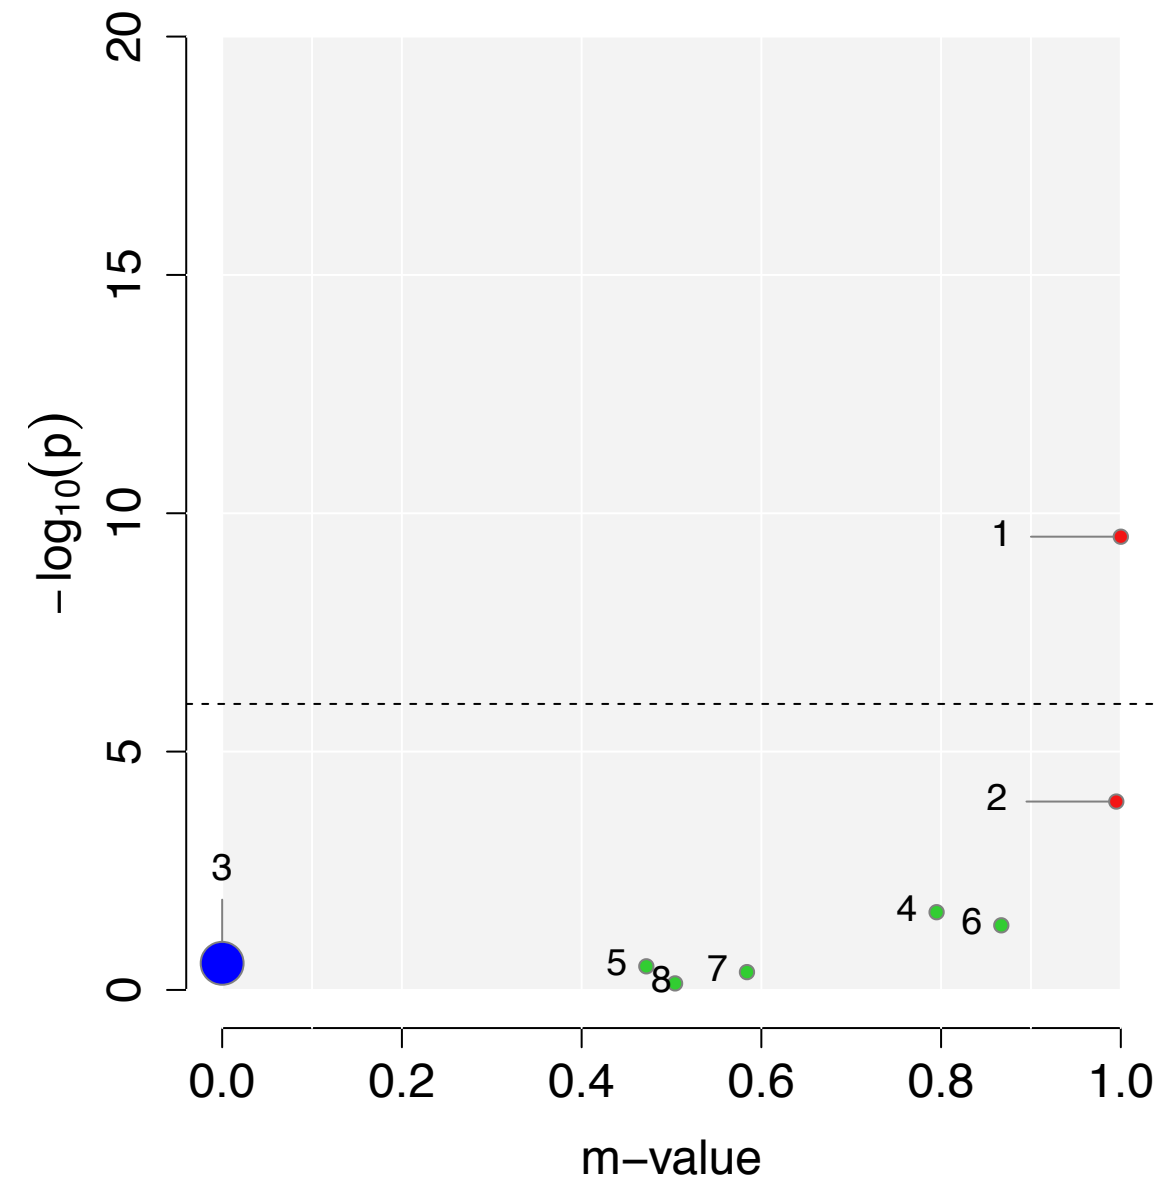

rs7085104 (Meta  $P = 3.35 \times 10^{-16}$ )

Gene : *AS3MT*, *C10orf32*

GWAS P-value

$1.03 \times 10^{-17}$  ● 1.SCZ

$1.45 \times 10^{-5}$  ● 2.BIP

0.0007 ● 3.MD

0.6490 ● 4.ASD

0.2656 ● 5.ADHD

0.9602 ● 6.TS

0.9072 ● 7.ANO

0.1988 ● 8.OCD

FE summary

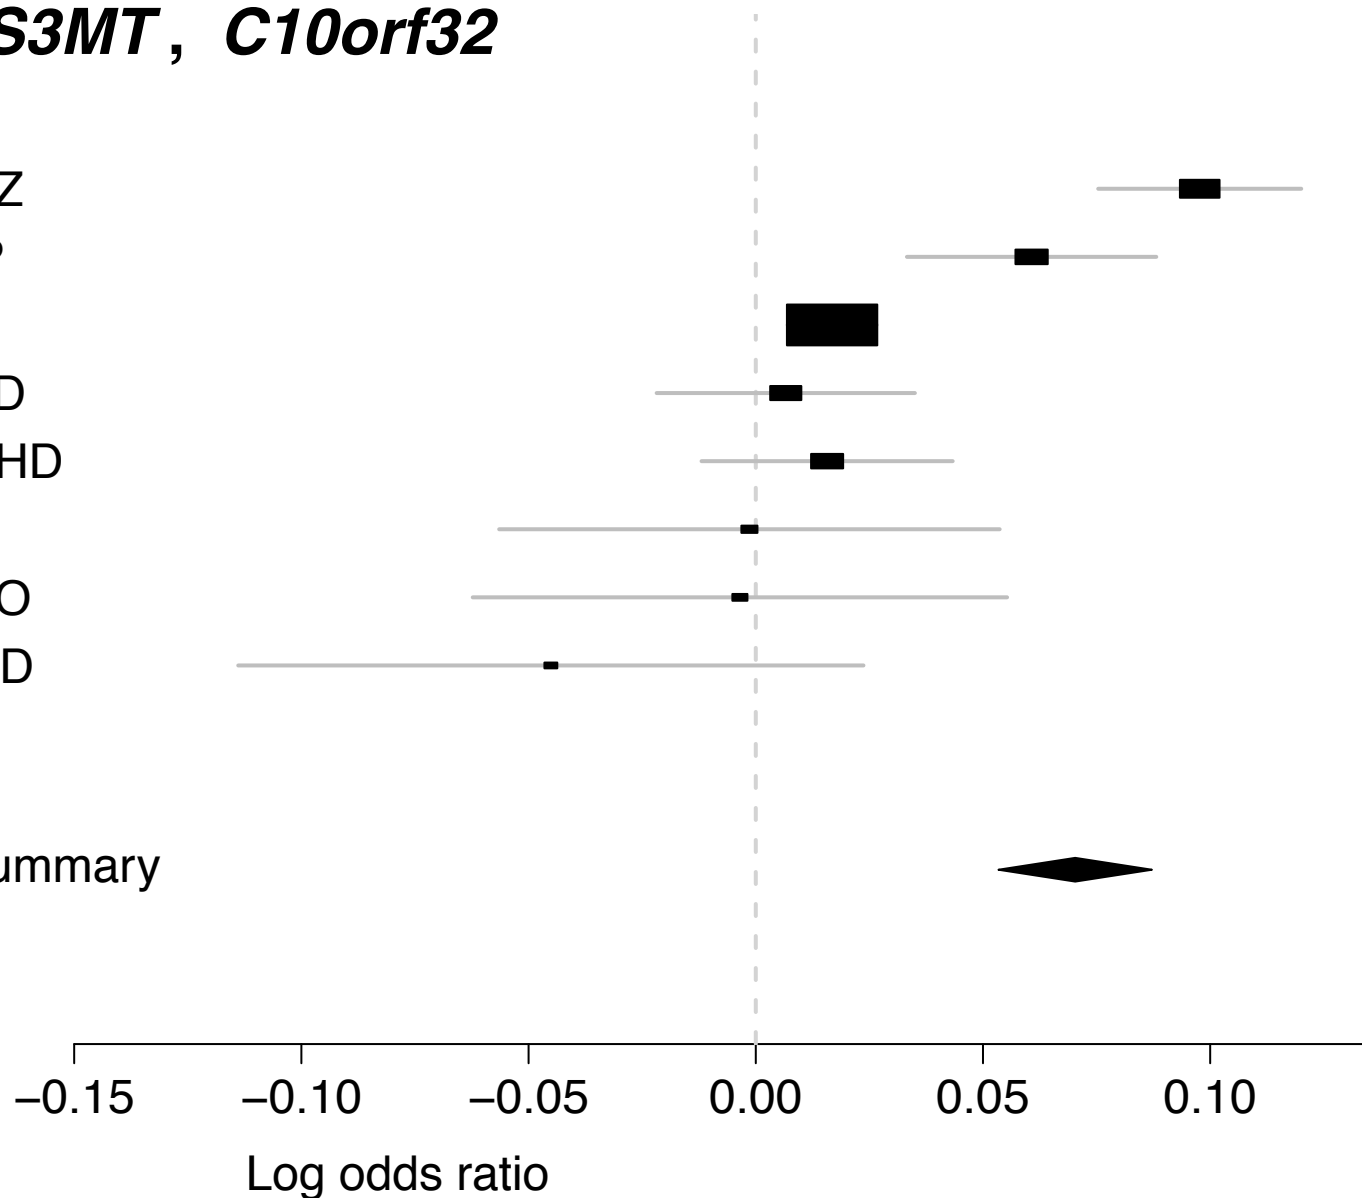

PM-Plot

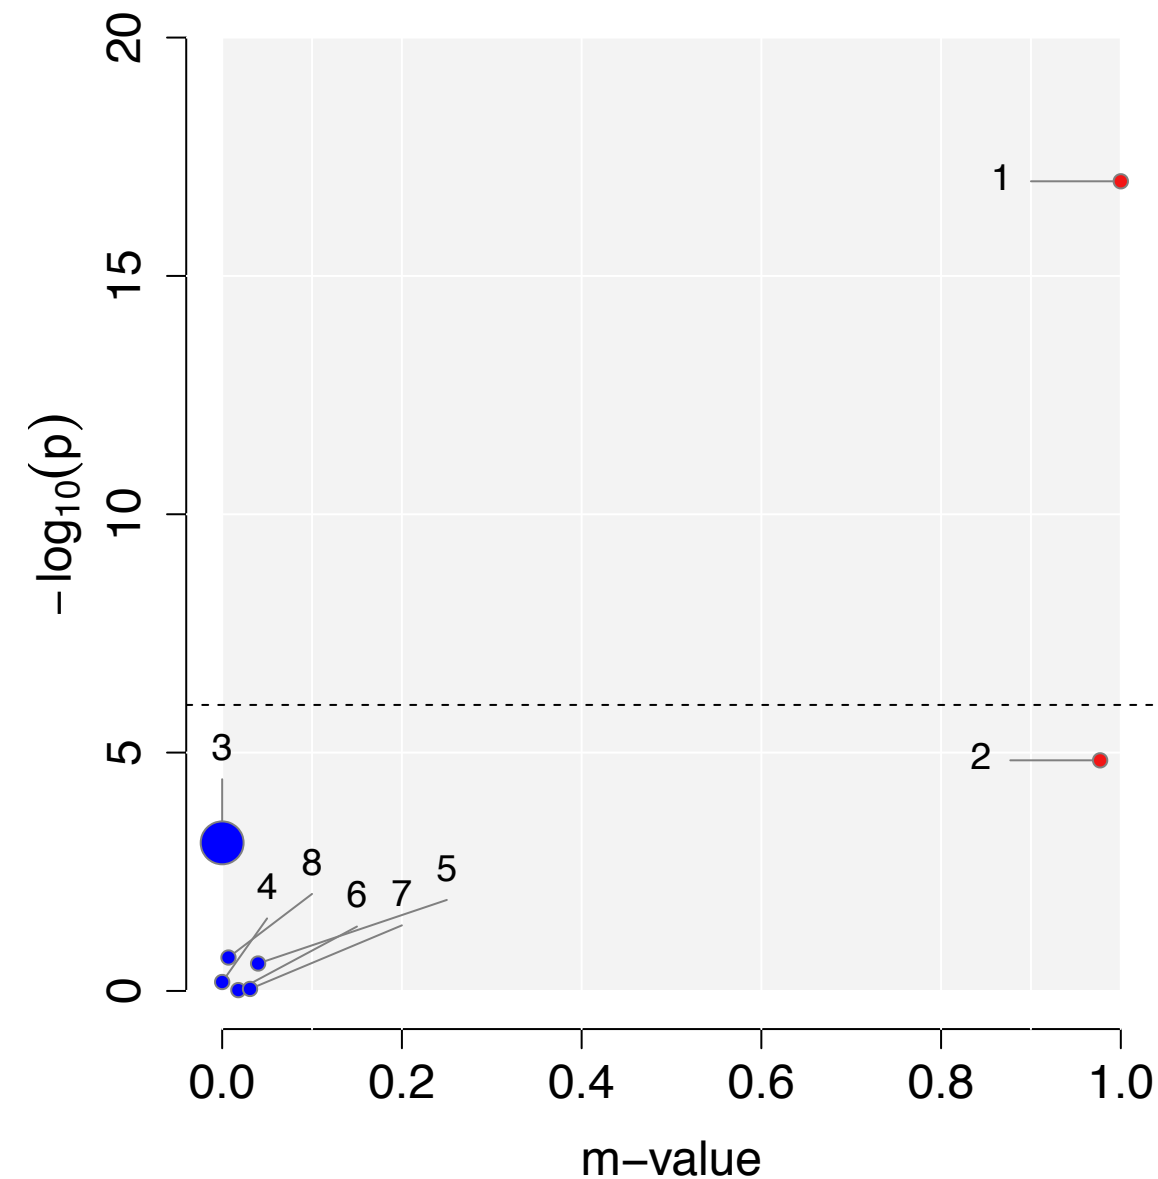



rs7193263 (Meta  $P = 5.59 \times 10^{-11}$ )

Gene : *RBFOX1*

GWAS P-value

- 0.0899 ● 1.SCZ
- 0.0003 ● 2.BIP
- $9.73 \times 10^{-9}$  ● 3.MD
- 0.0053 ● 4.ASD
- 0.0065 ● 5.ADHD
- 0.0851 ● 6.TS
- 0.9343 ● 7.ANO
- 0.1886 ● 8.OCD

FE summary

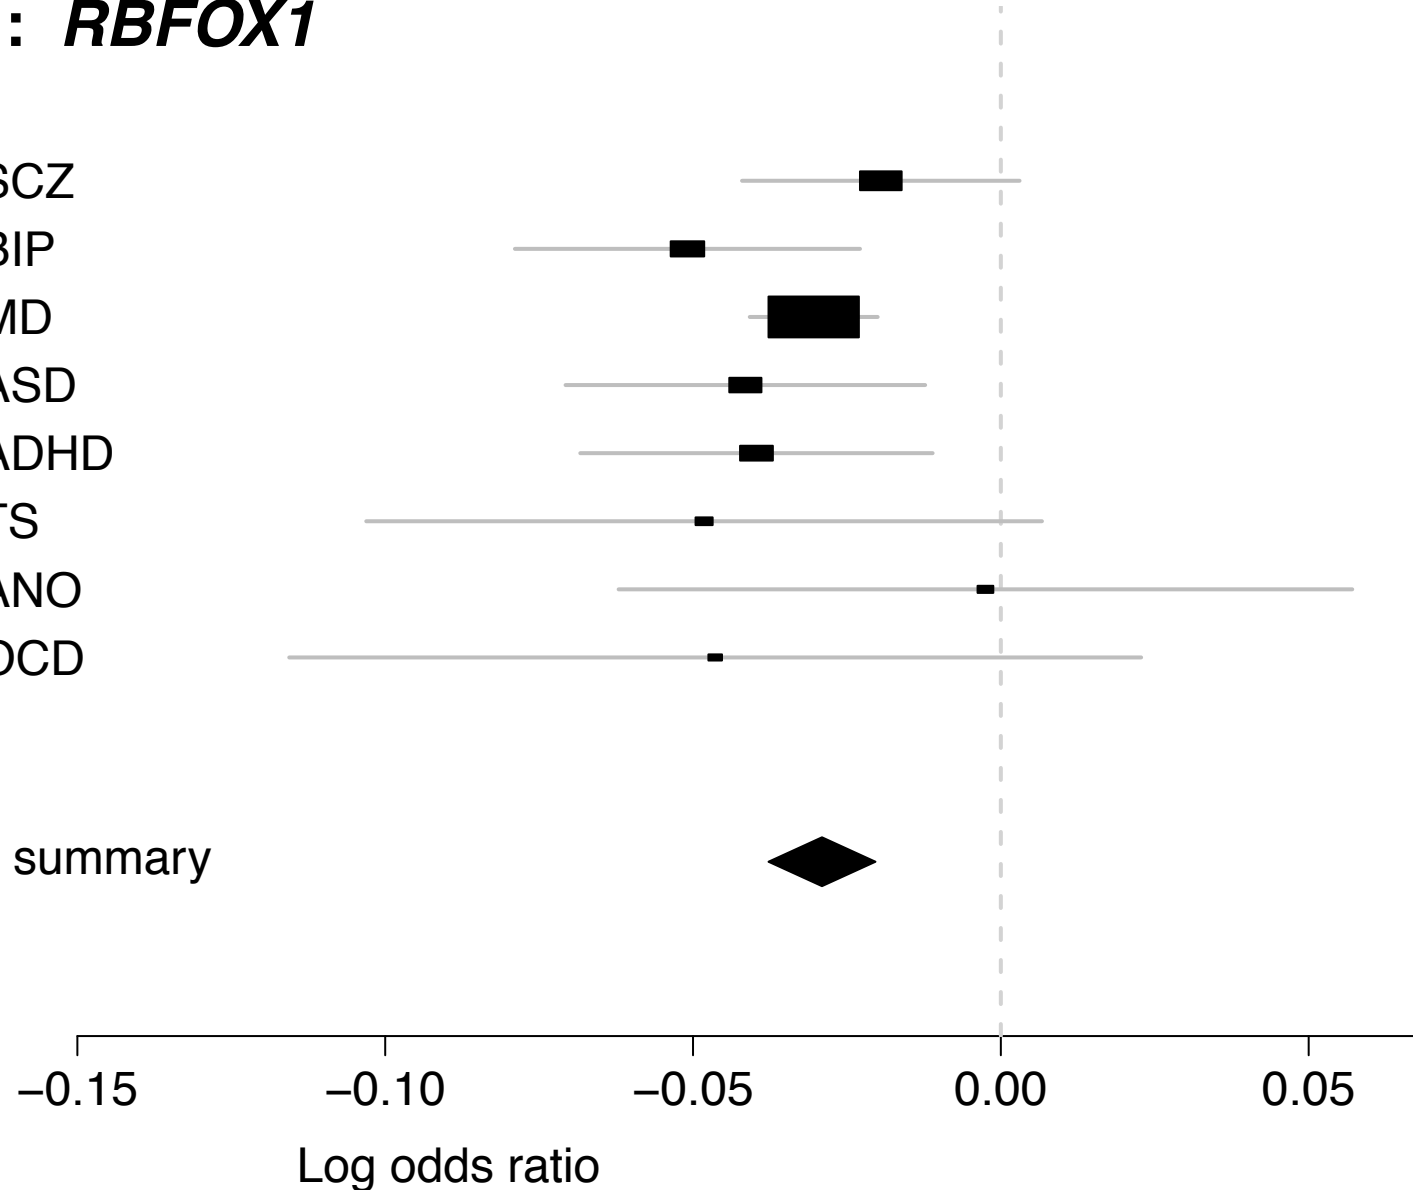

PM-Plot

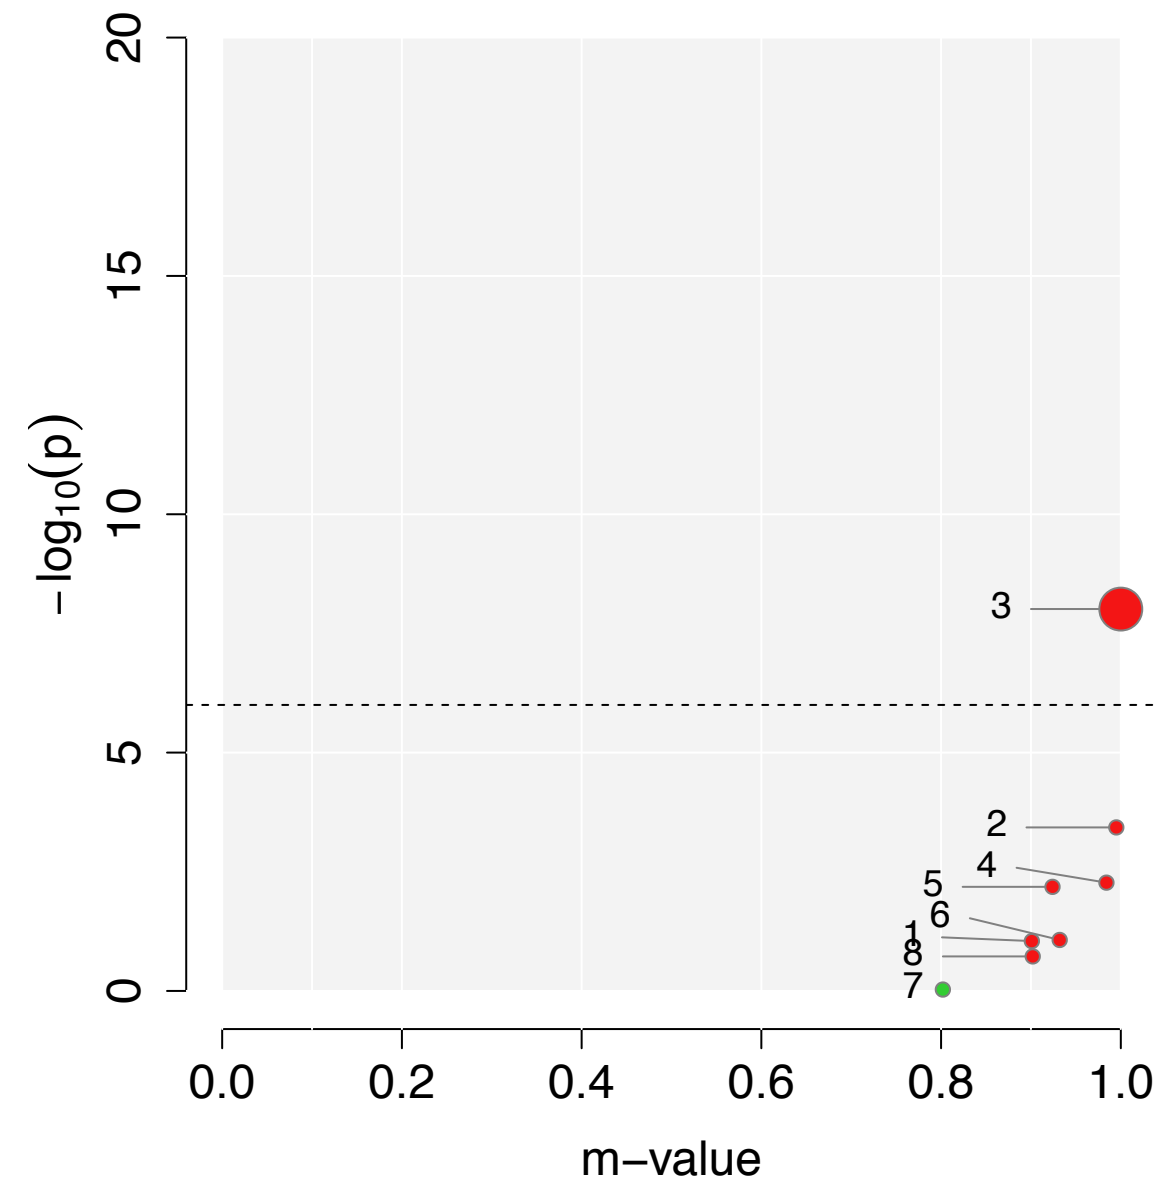

# rs7200826 (Meta $P = 1.35 \times 10^{-8}$ )

Gene : *SHISA9*

## GWAS P-value

- 0.2691 ● 1.SCZ
- 0.0011 ● 2.BIP
- $2.37 \times 10^{-8}$  ● 3.MD
- 0.8604 ● 4.ASD
- 0.1923 ● 5.ADHD
- 0.8050 ● 6.TS
- 0.0986 ● 7.ANO
- 0.5679 ● 8.OCD

FE summary

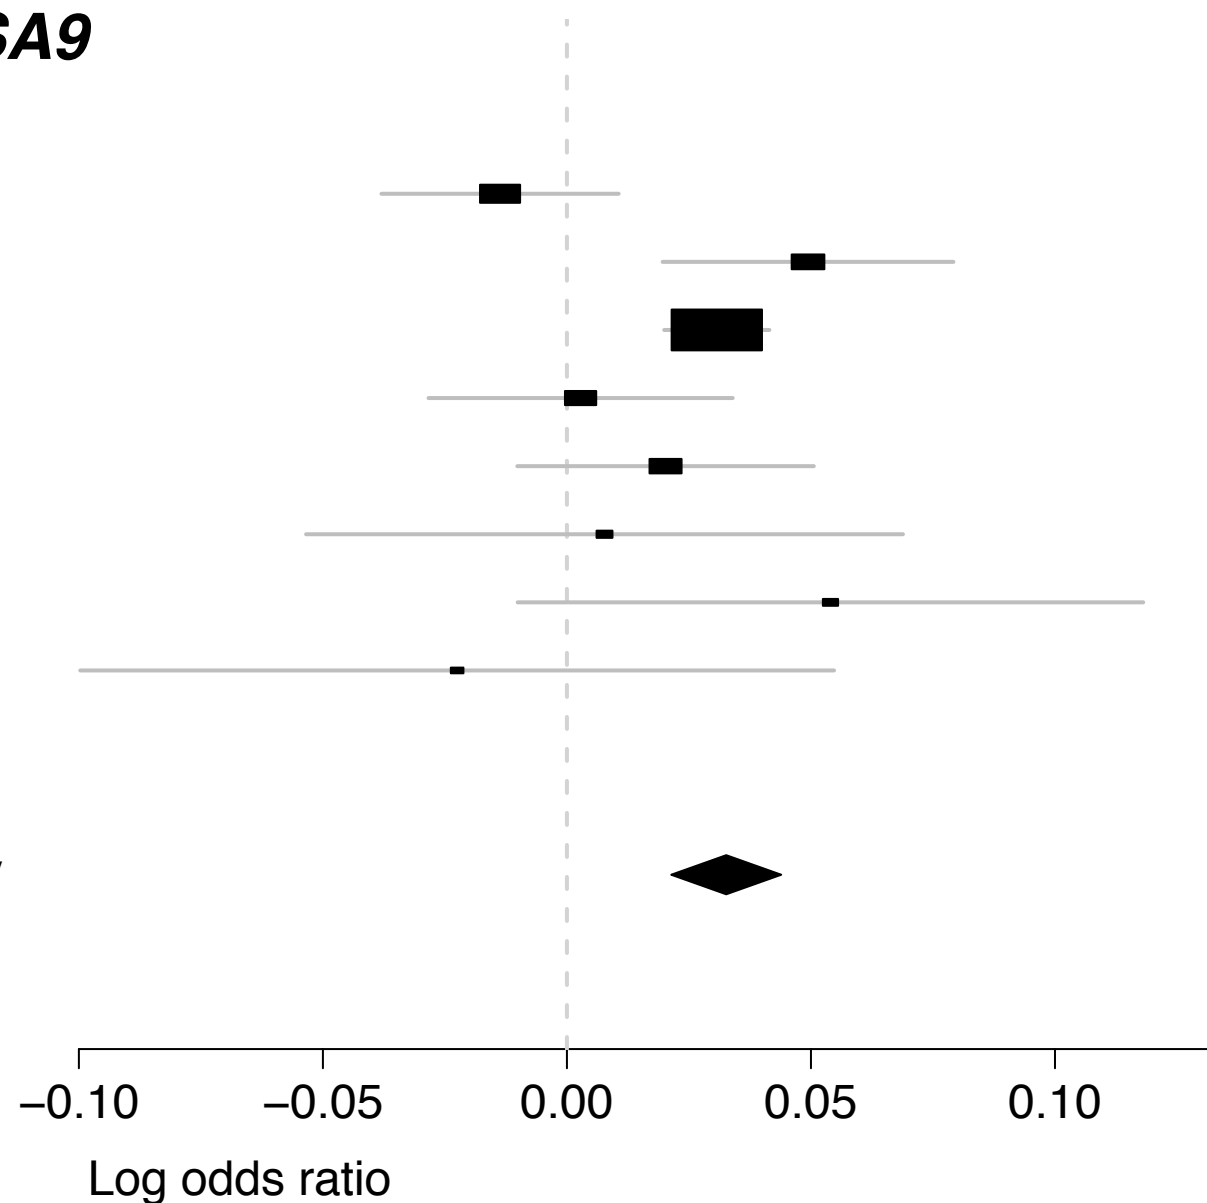

## PM-Plot

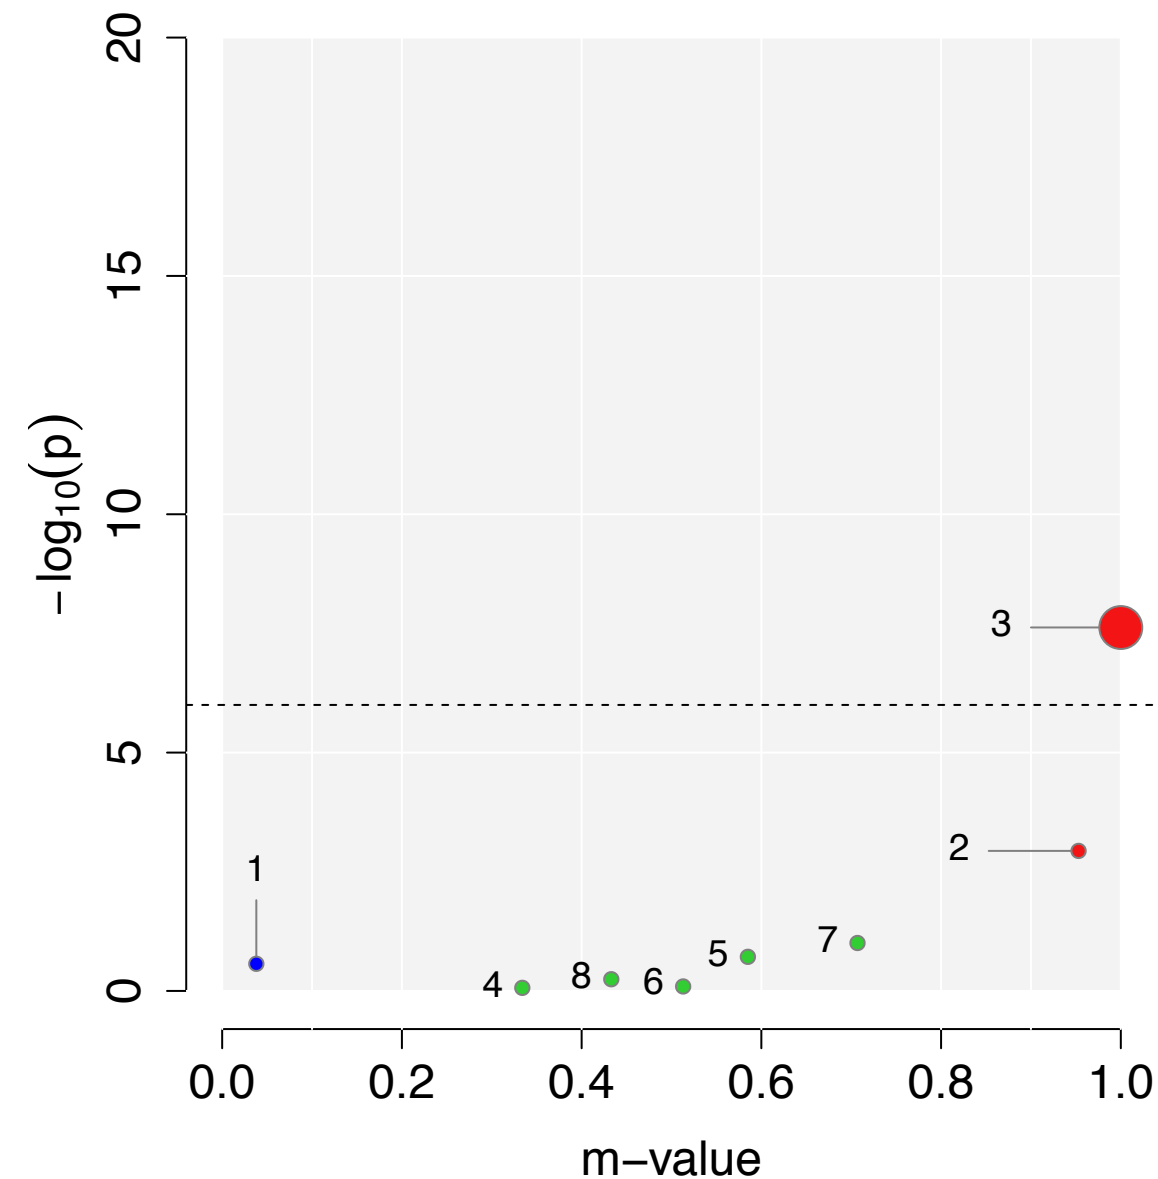

# rs7405404 (Meta $P = 1.29 \times 10^{-12}$ )

Gene : (>200kb)

## GWAS P-value

- 1.40 x 10<sup>-9</sup> ● 1.SCZ
- 0.0266 ● 2.BIP
- 1.51 x 10<sup>-7</sup> ● 3.MD
- 0.0005 ● 4.ASD
- 0.3262 ● 5.ADHD
- 0.4503 ● 6.TS
- 0.6465 ● 7.ANO
- 0.9736 ● 8.OCD

FE summary

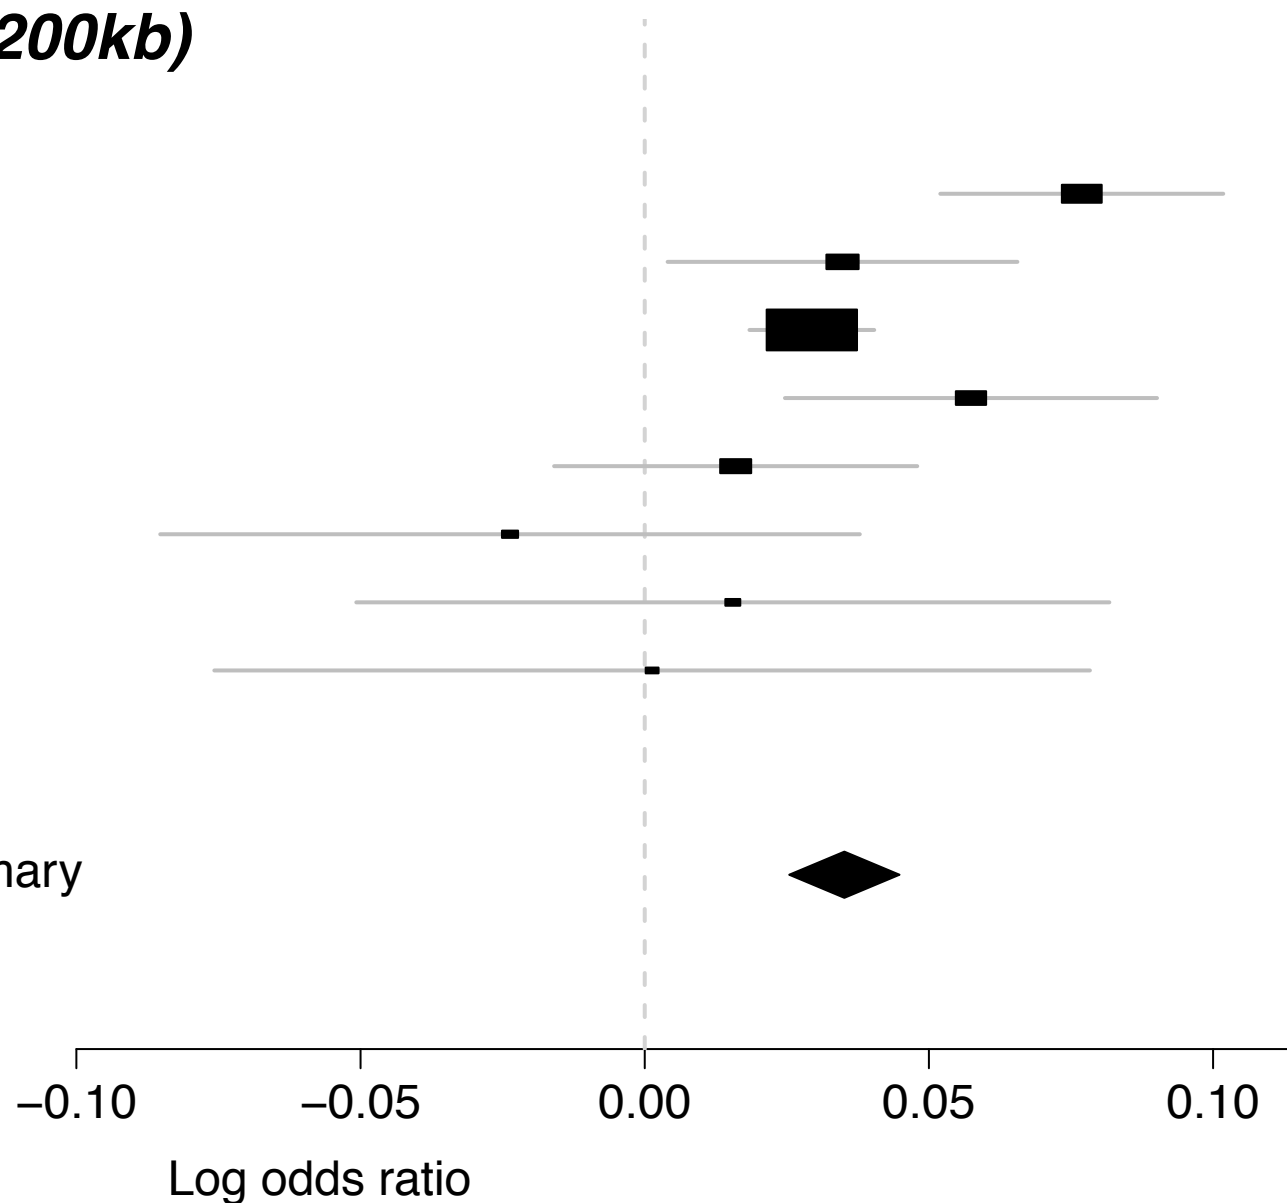

## PM-Plot

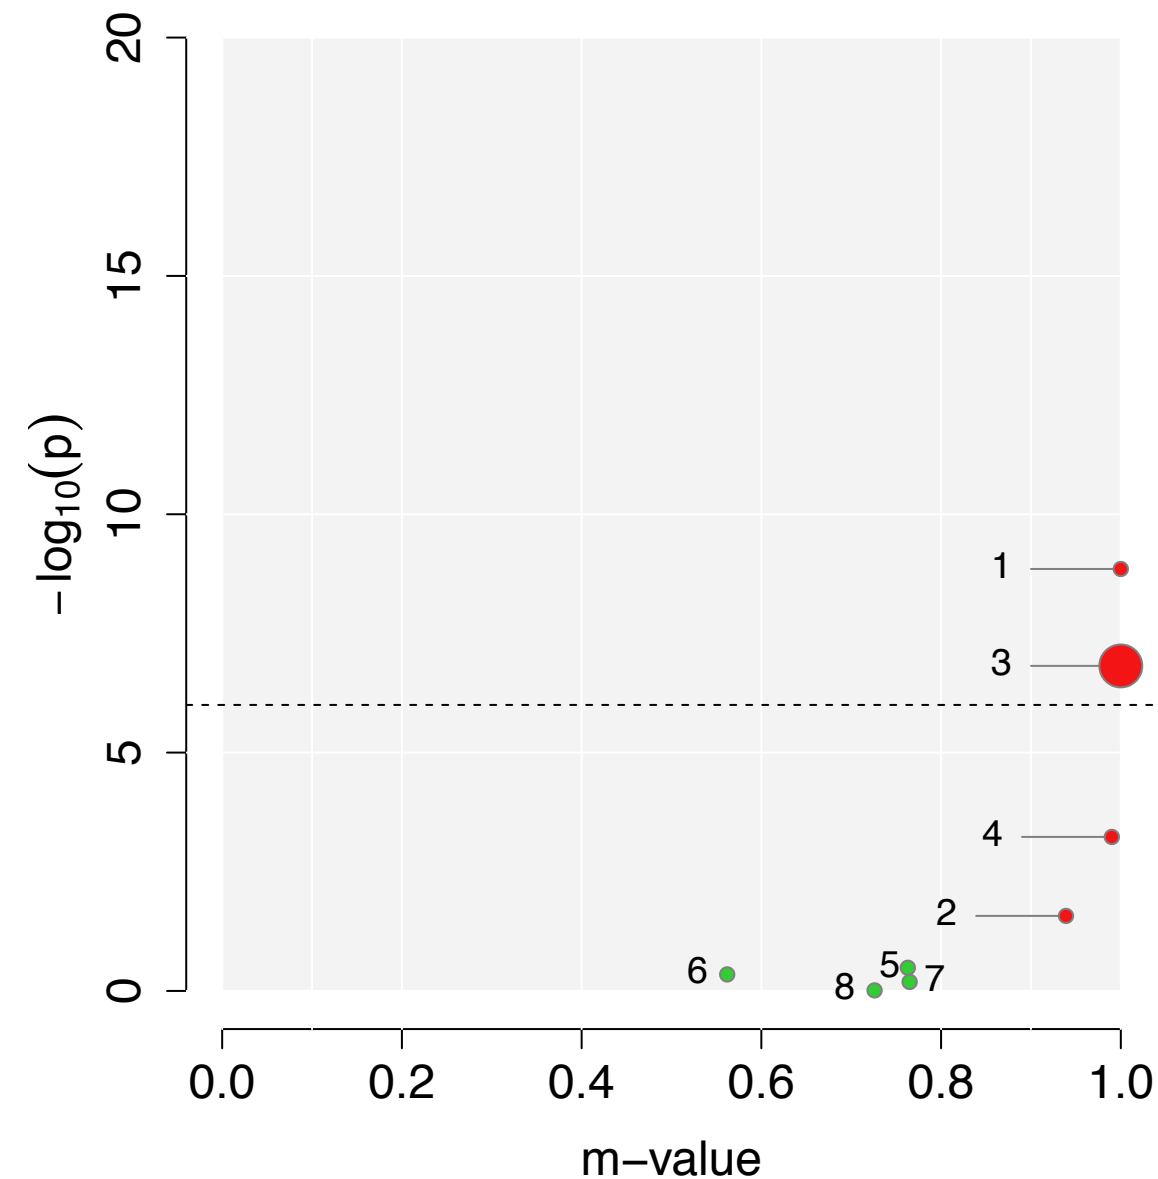

# rs7521492 (Meta $P = 1.23 \times 10^{-9}$ )

Gene : (>200kb)

## GWAS P-value

- $4.96 \times 10^{-7}$  ● 1.SCZ
- 0.0002 ● 2.BIP
- 0.0084 ● 3.MD
- 0.0018 ● 4.ASD
- 0.5969 ● 5.ADHD
- 0.0179 ● 6.TS
- 0.0334 ● 7.ANO
- 0.2464 ● 8.OCD

FE summary

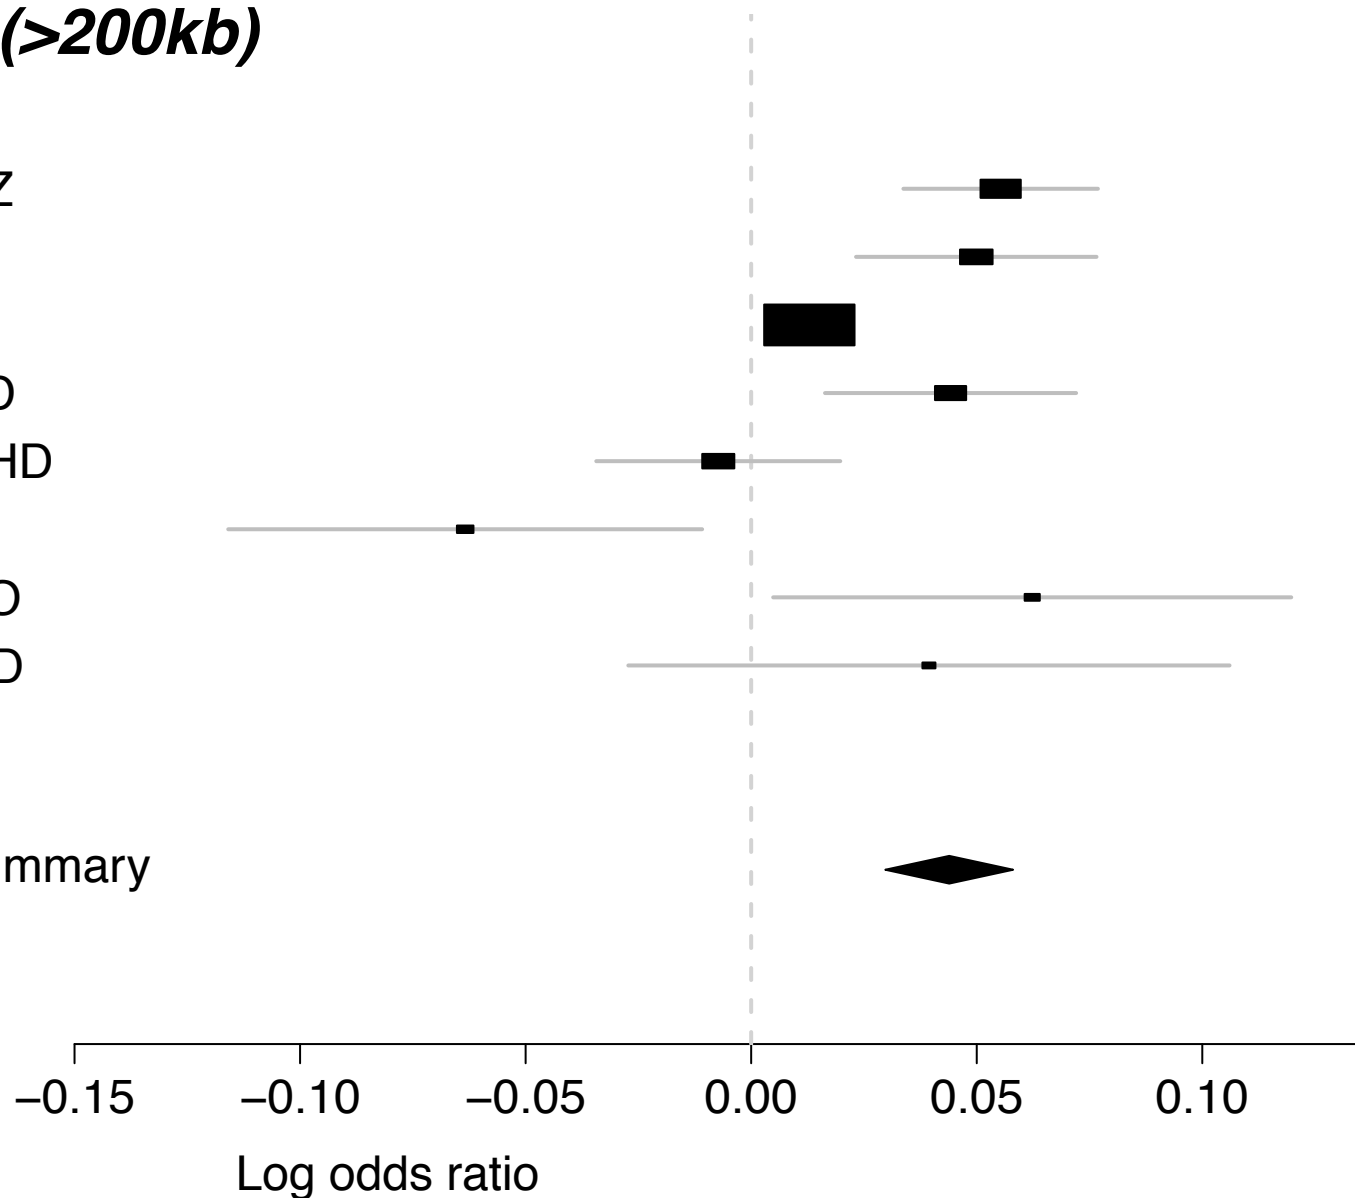

## PM-Plot

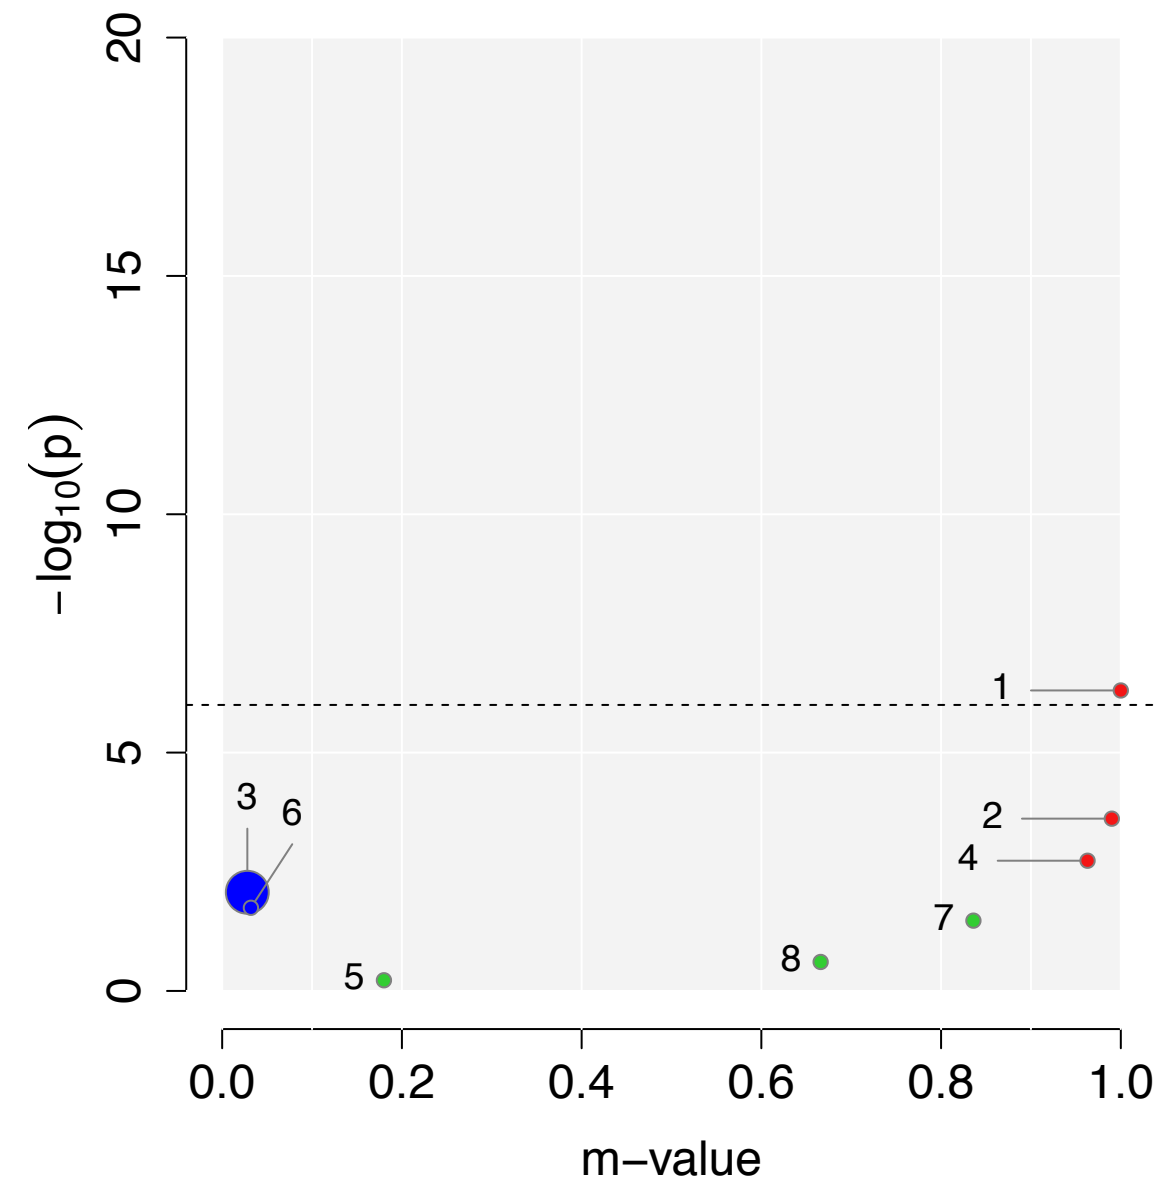

rs7531118 (Meta  $P = 1.02 \times 10^{-15}$ )

Gene : *NEGR1*

GWAS P-value

- 0.0116 ● 1.SCZ
- 0.2404 ● 2.BIP
- $1.03 \times 10^{-14}$  ● 3.MD
- 0.0192 ● 4.ASD
- 0.6974 ● 5.ADHD
- 0.0905 ● 6.TS
- 0.0142 ● 7.ANO
- 0.3483 ● 8.OCD

FE summary

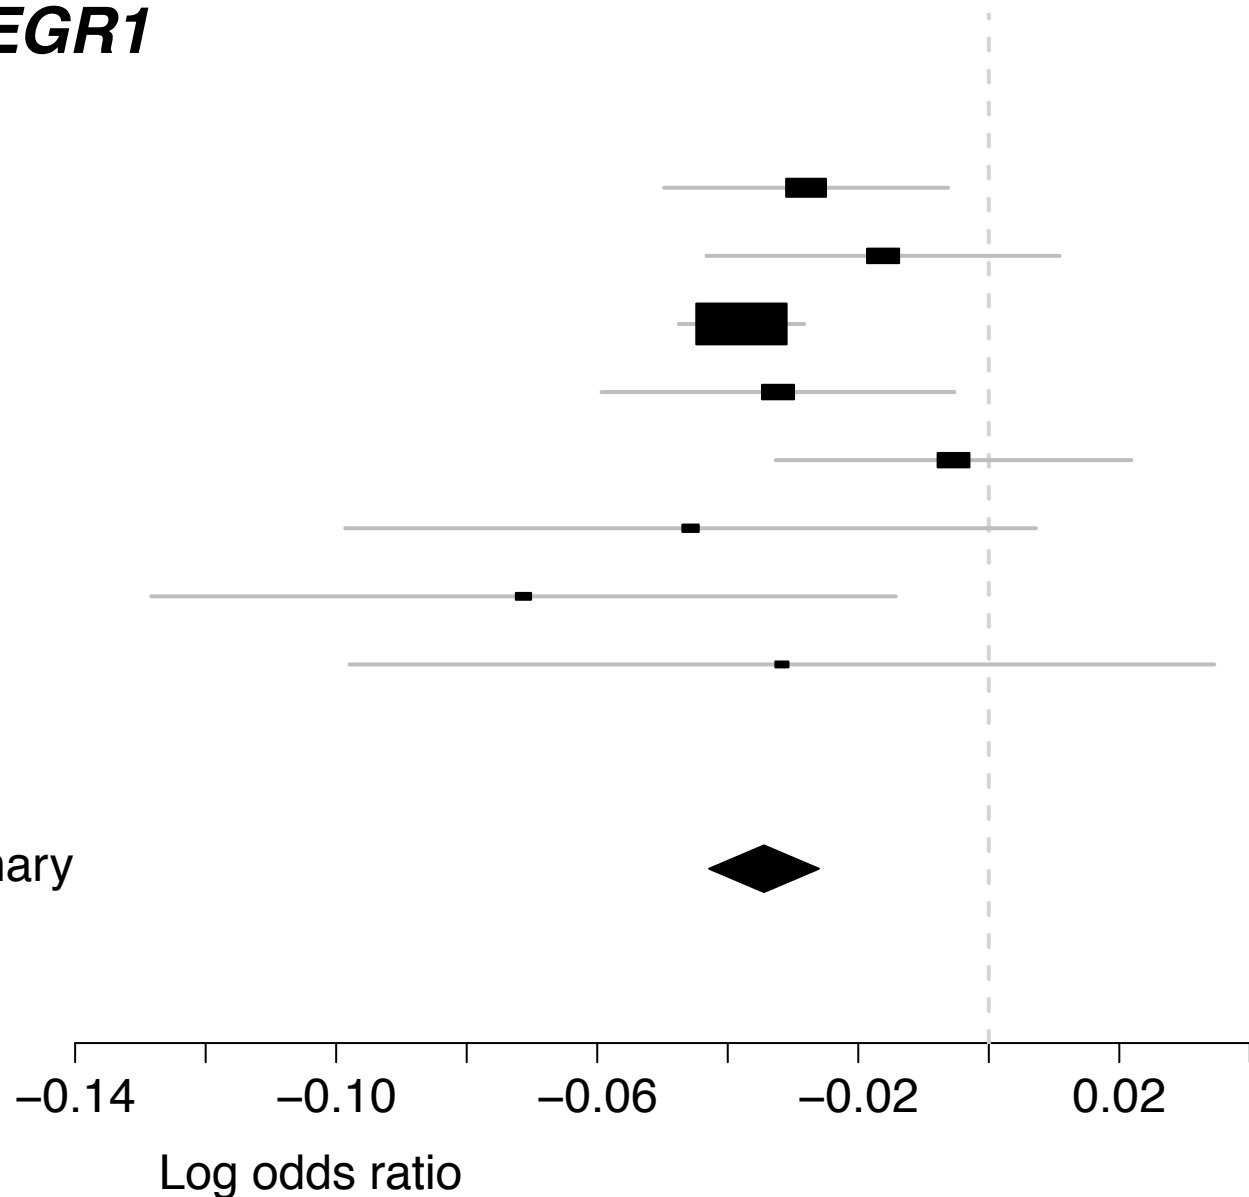

PM-Plot

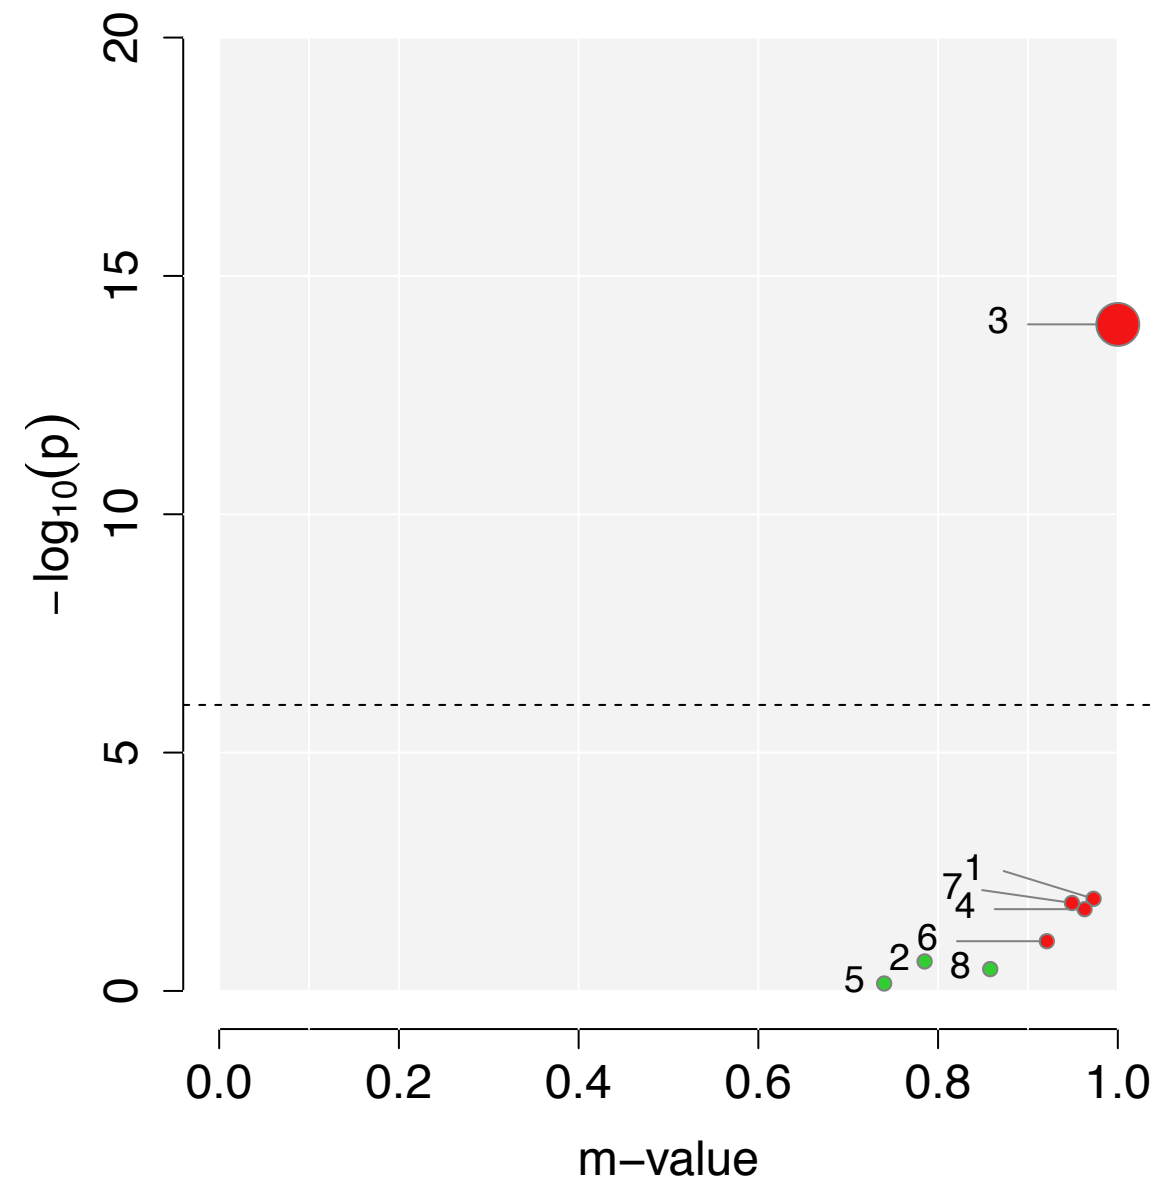

# rs7618871 (Meta $P = 1.48 \times 10^{-8}$ )

Gene : ***STAG1***

## GWAS P-value

- 1.46 x 10<sup>-10</sup> ● 1.SCZ
- 0.9233 ● 2.BIP
- 0.3175 ● 3.MD
- 0.2245 ● 4.ASD
- 0.6537 ● 5.ADHD
- 0.5373 ● 6.TS
- 0.2977 ● 7.ANO
- 0.7433 ● 8.OCD

FE summary

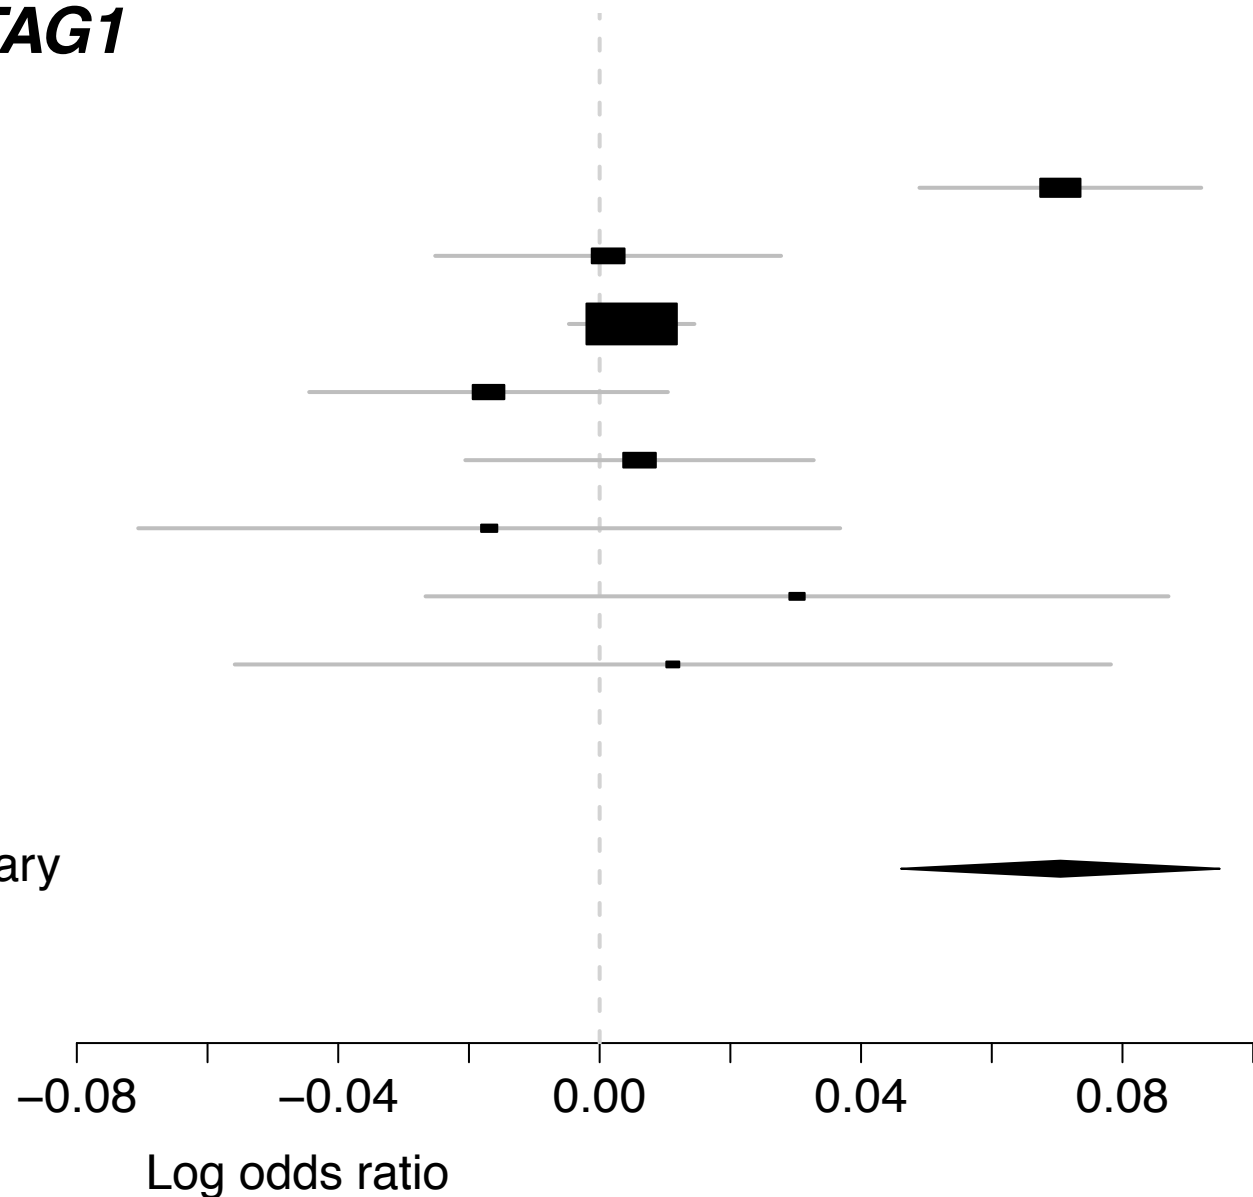

## PM-Plot

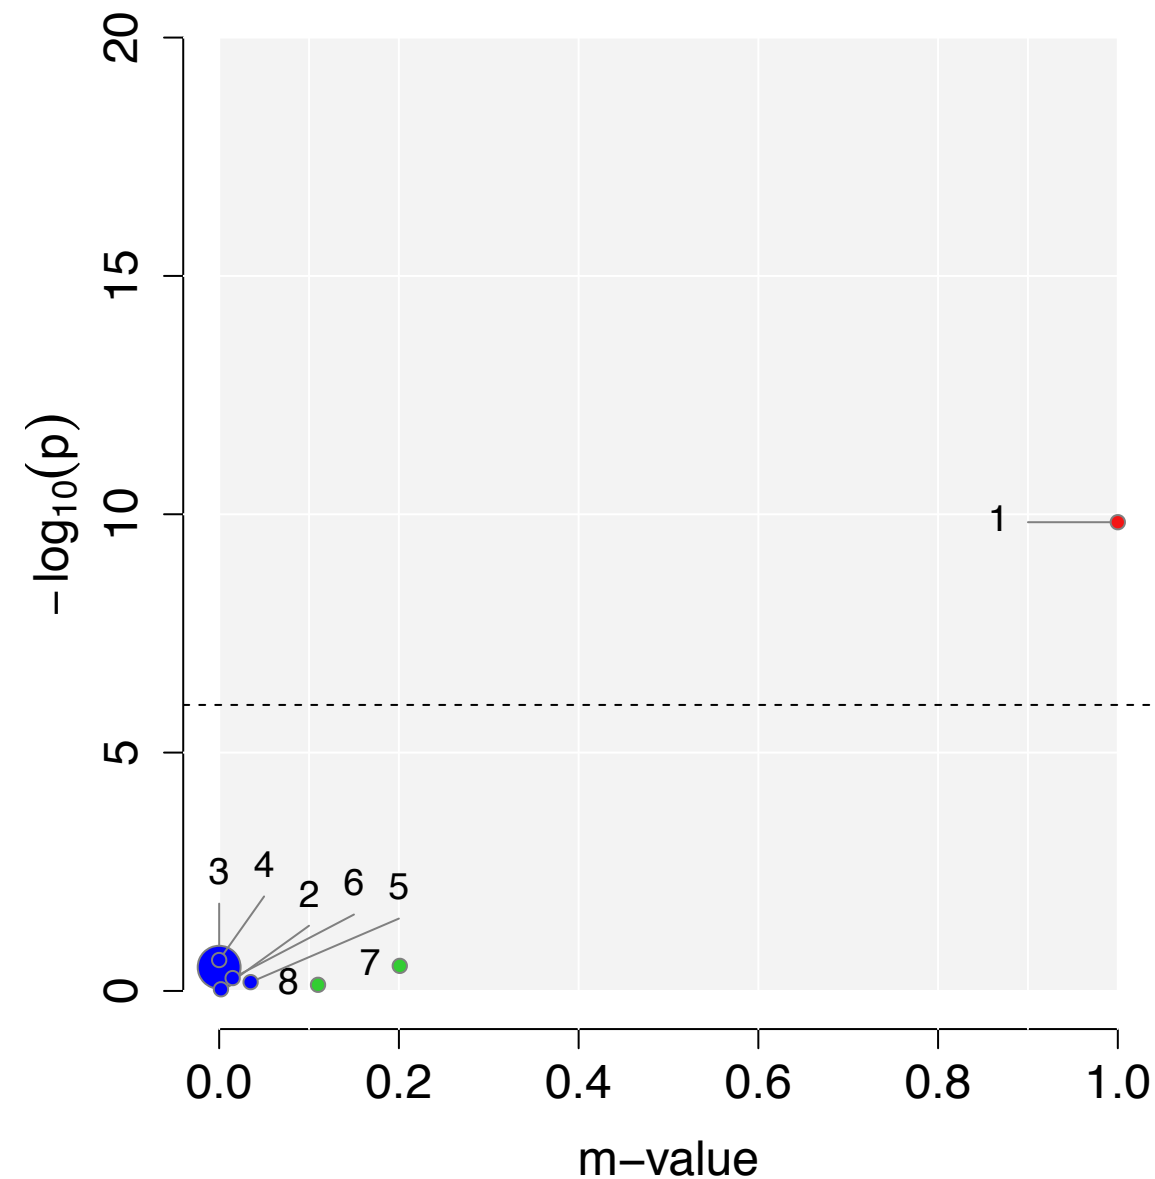

# rs7785663 (Meta $P = 2.7e \times 10^{-8}$ )

Gene : *DGKI*, *PTN*

## GWAS P-value

- 4.85 x 10<sup>-8</sup> ● 1.SCZ
- 0.0002 ● 2.BIP
- 0.4589 ● 3.MD
- 0.0386 ● 4.ASD
- 0.1817 ● 5.ADHD
- 0.7940 ● 6.TS
- 0.3709 ● 7.ANO
- 0.1790 ● 8.OCD

FE summary

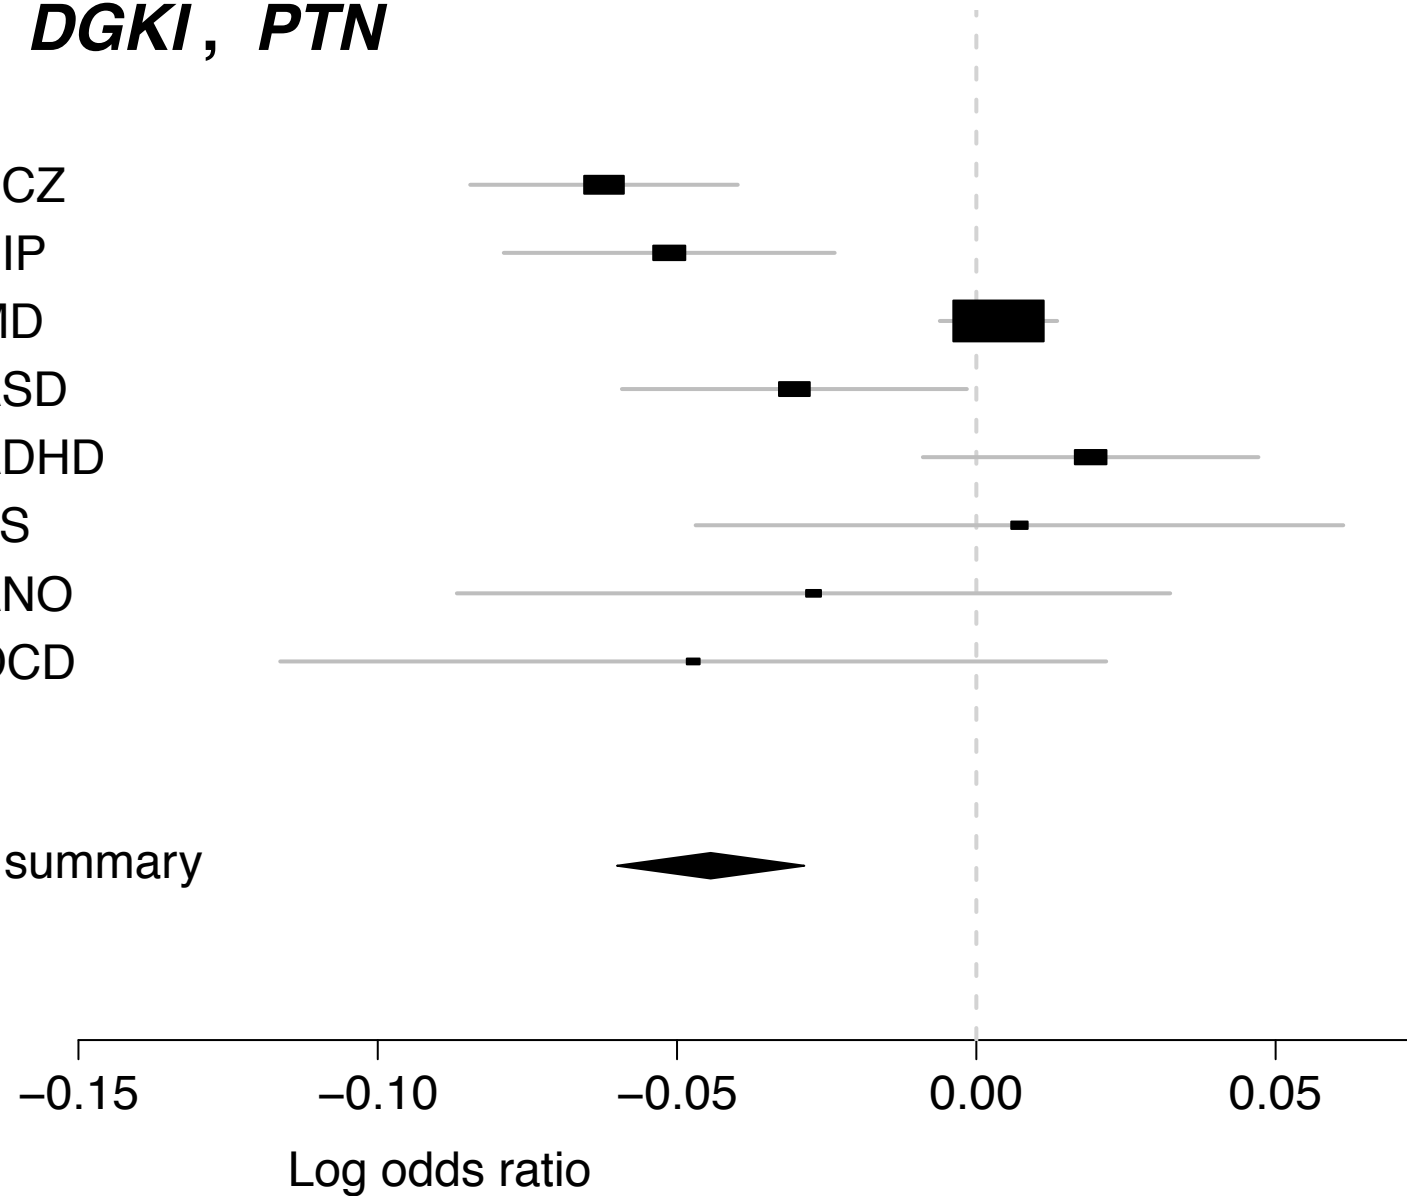

## PM-Plot

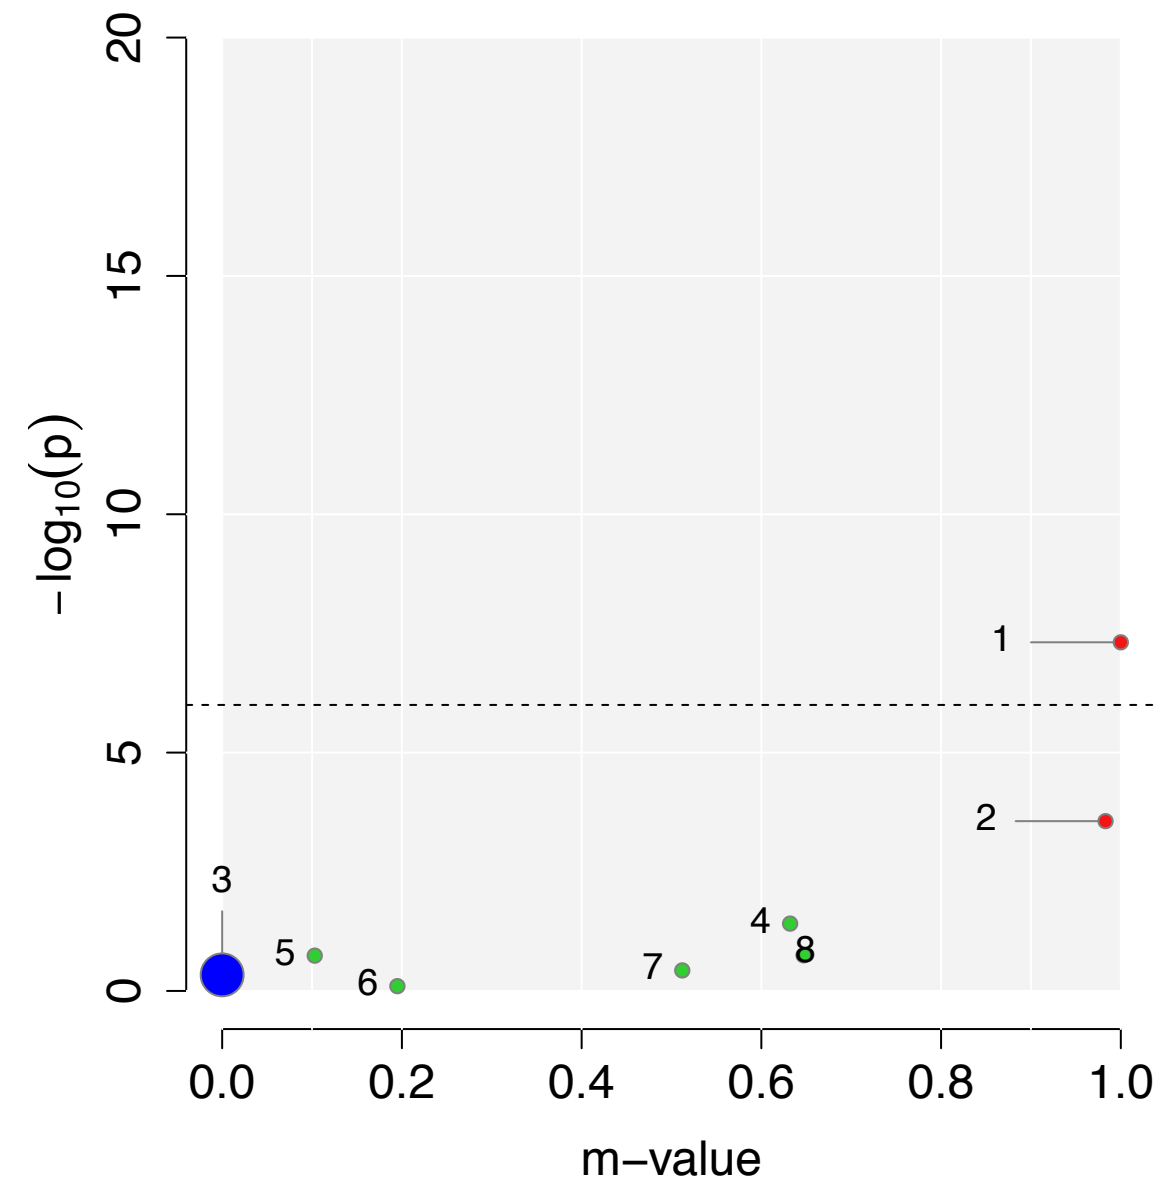

# rs7968921 (Meta $P = 4.67 \times 10^{-8}$ )

Gene : **SOX5**

## GWAS P-value

- 0.0010 ● 1.SCZ
- 0.9881 ● 2.BIP
- $7.17 \times 10^{-8}$  ● 3.MD
- 0.5951 ● 4.ASD
- 0.3424 ● 5.ADHD
- 0.9559 ● 6.TS
- 0.4265 ● 7.ANO
- 0.9575 ● 8.OCD

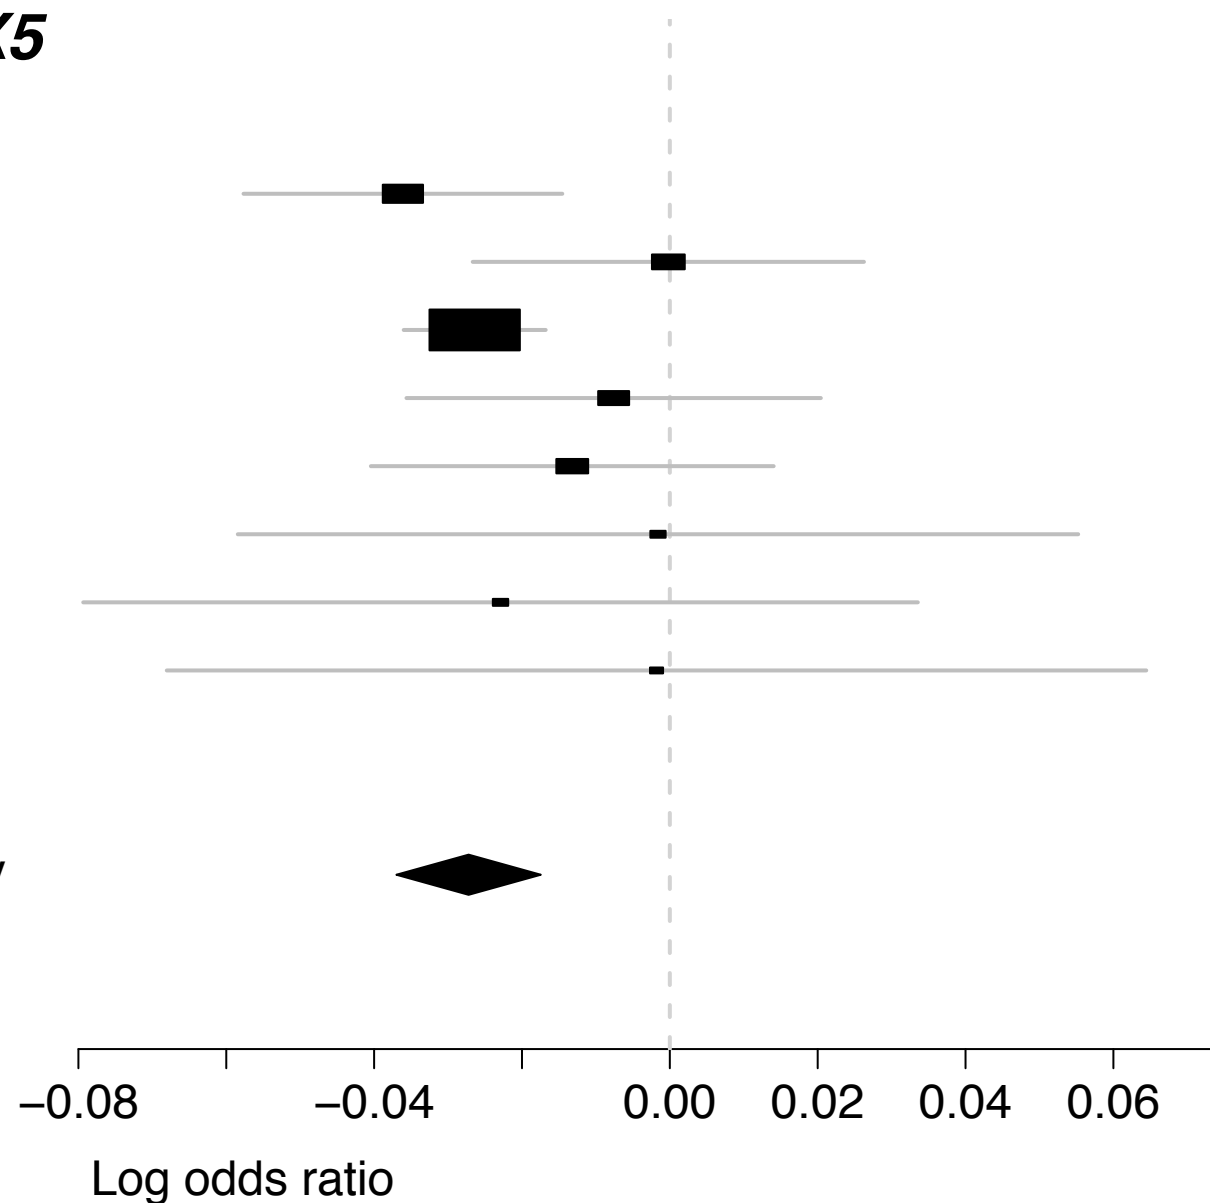

## PM-Plot

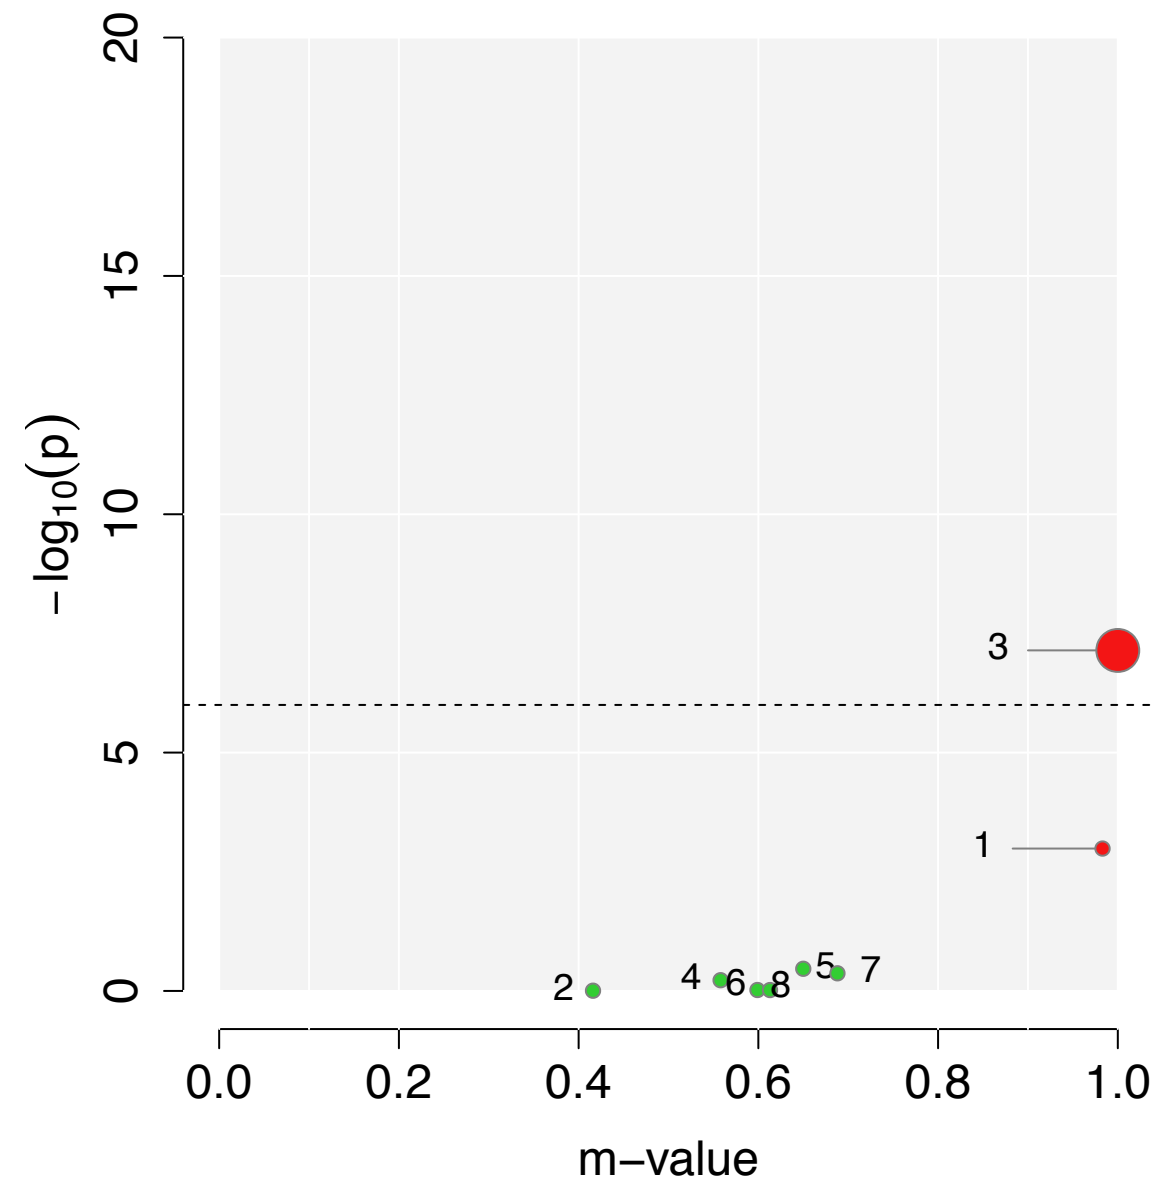



rs8054556 (Meta  $P = 3.75 \times 10^{-11}$ )

Gene : *TMEM219*, *KCTD13*

GWAS P-value

- 4.67 x 10<sup>-10</sup> ● 1.SCZ
- 0.0002 ● 2.BIP
- 0.0637 ● 3.MD
- 0.0179 ● 4.ASD
- 0.2509 ● 5.ADHD
- 0.5807 ● 6.TS
- 0.6785 ● 7.ANO
- 0.0022 ● 8.OCD

FE summary

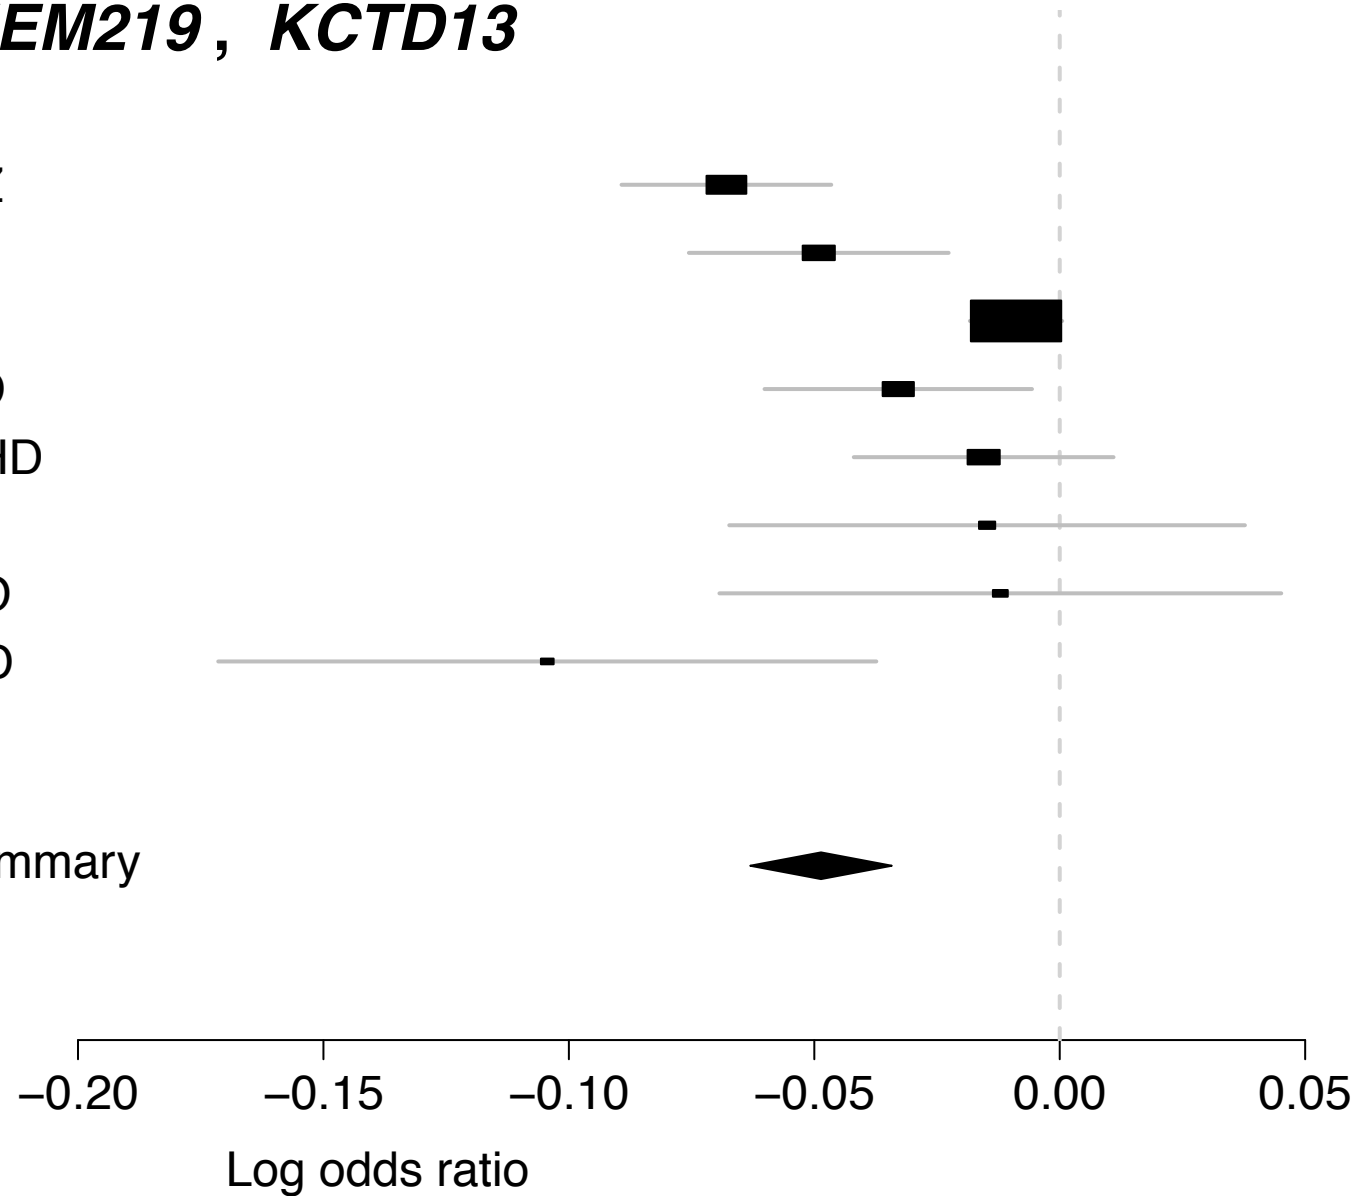

PM-Plot

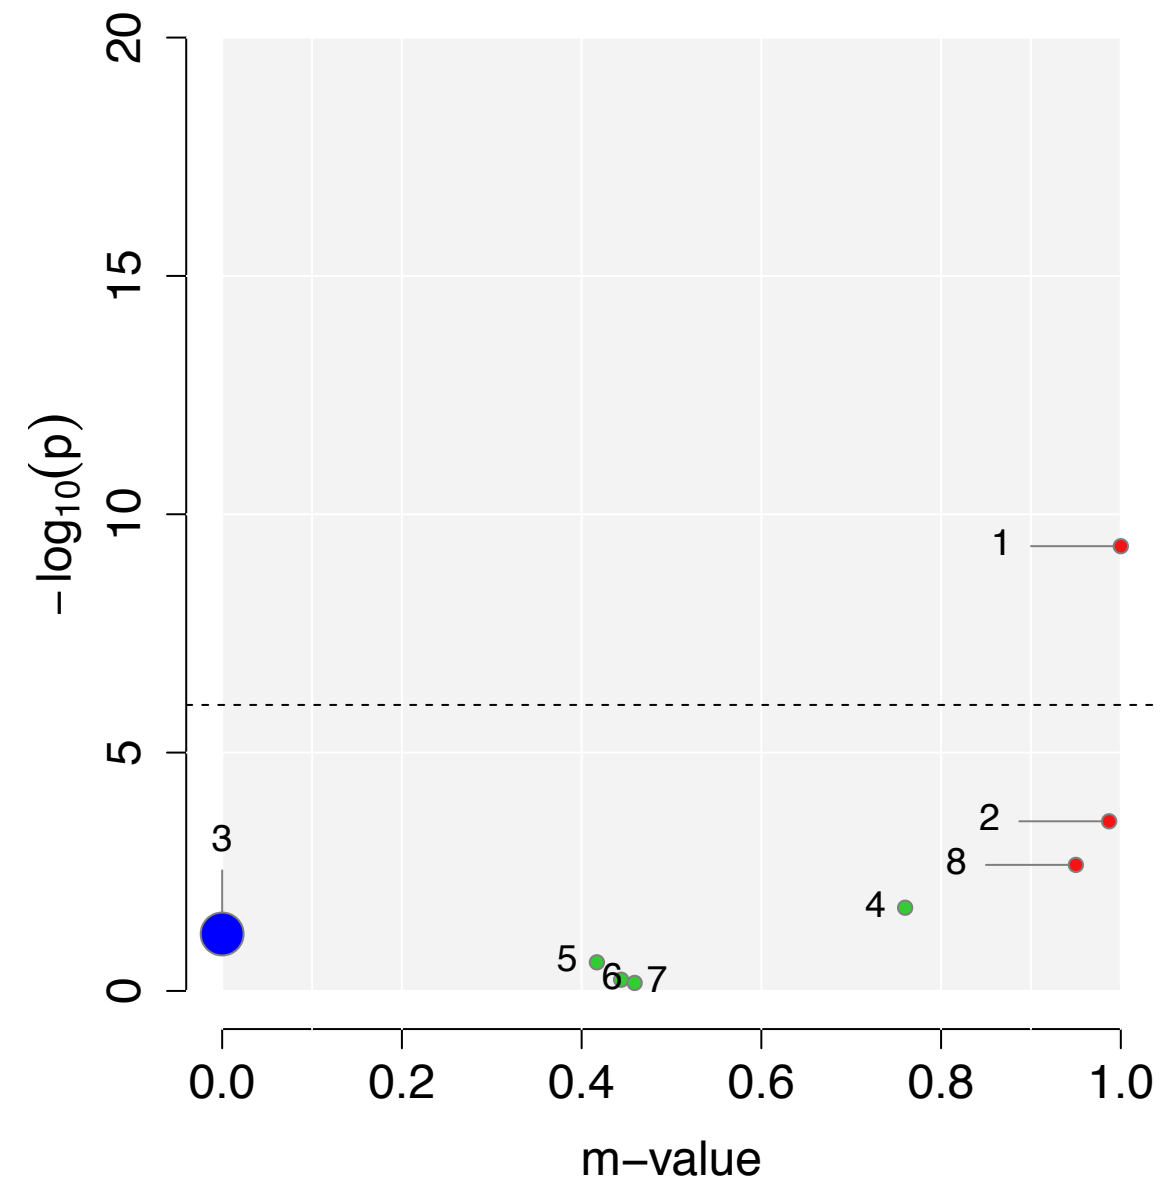

# rs8066384 (Meta $P = 3.22 \times 10^{-8}$ )

Gene : *RPTOR*

## GWAS P-value

- 1.97 x 10<sup>-6</sup> ● 1.SCZ
- 4.04 x 10<sup>-5</sup> ● 2.BIP
- 0.0636 ● 3.MD
- 0.1969 ● 4.ASD
- 0.2100 ● 5.ADHD
- 0.4720 ● 6.TS
- 0.0419 ● 7.ANO
- 0.0337 ● 8.OCD

FE summary

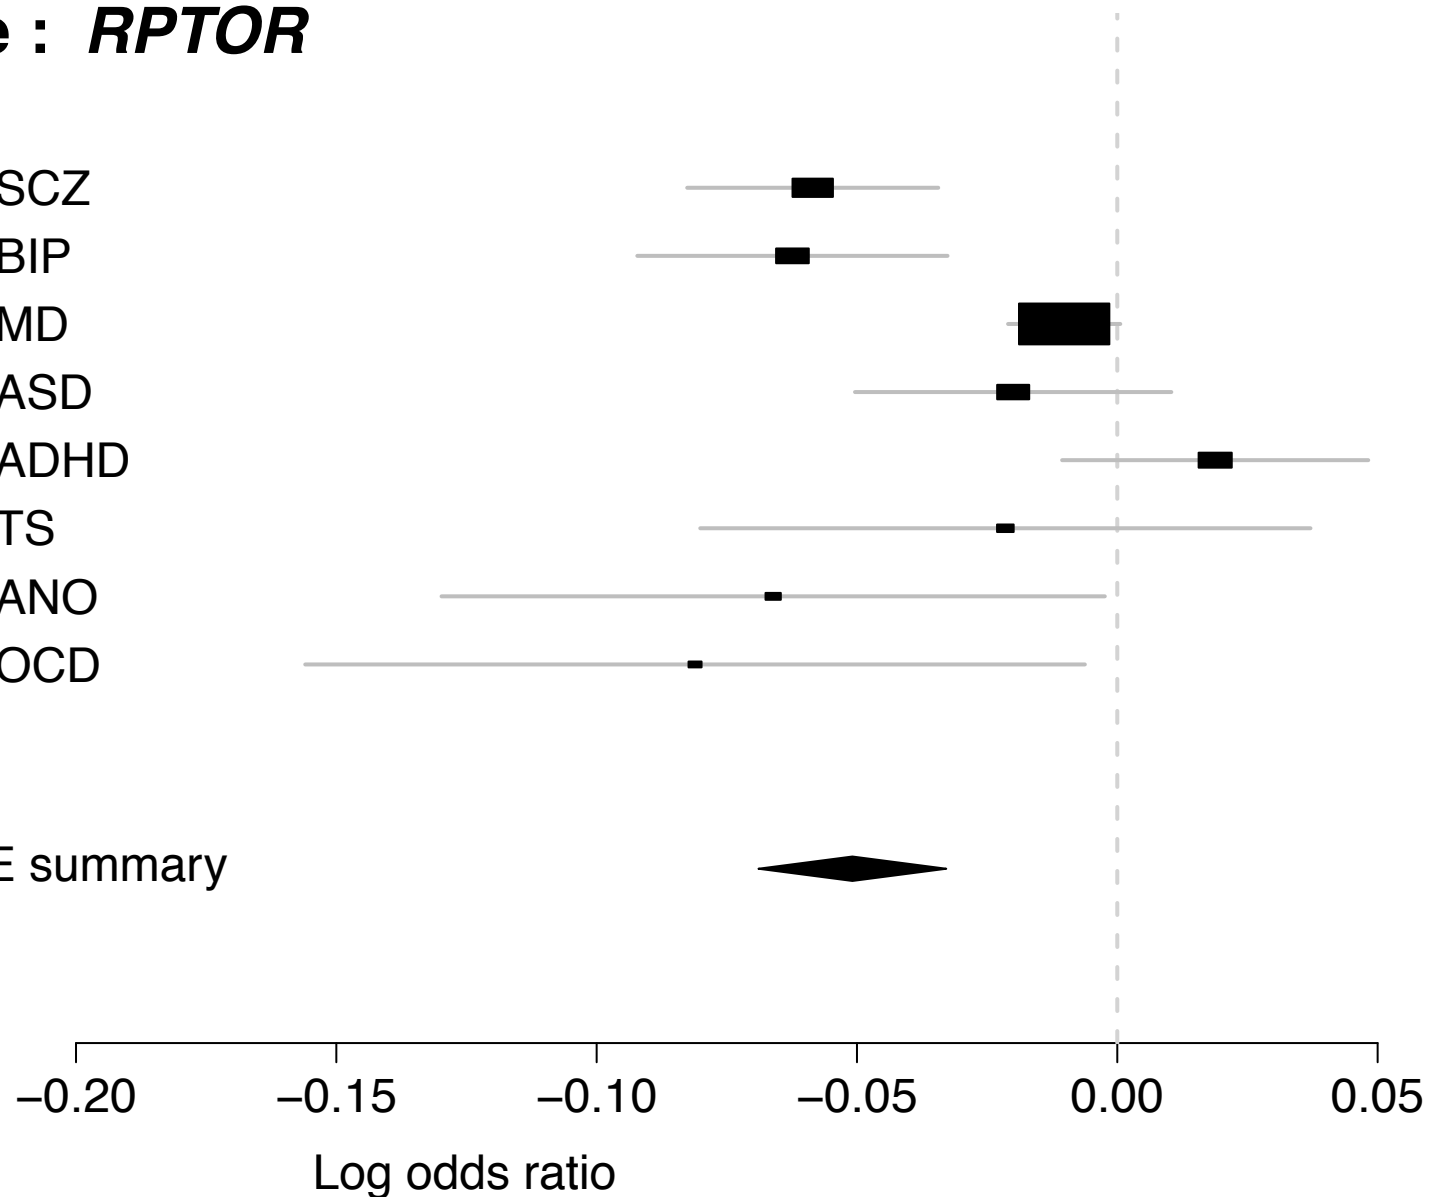

## PM-Plot

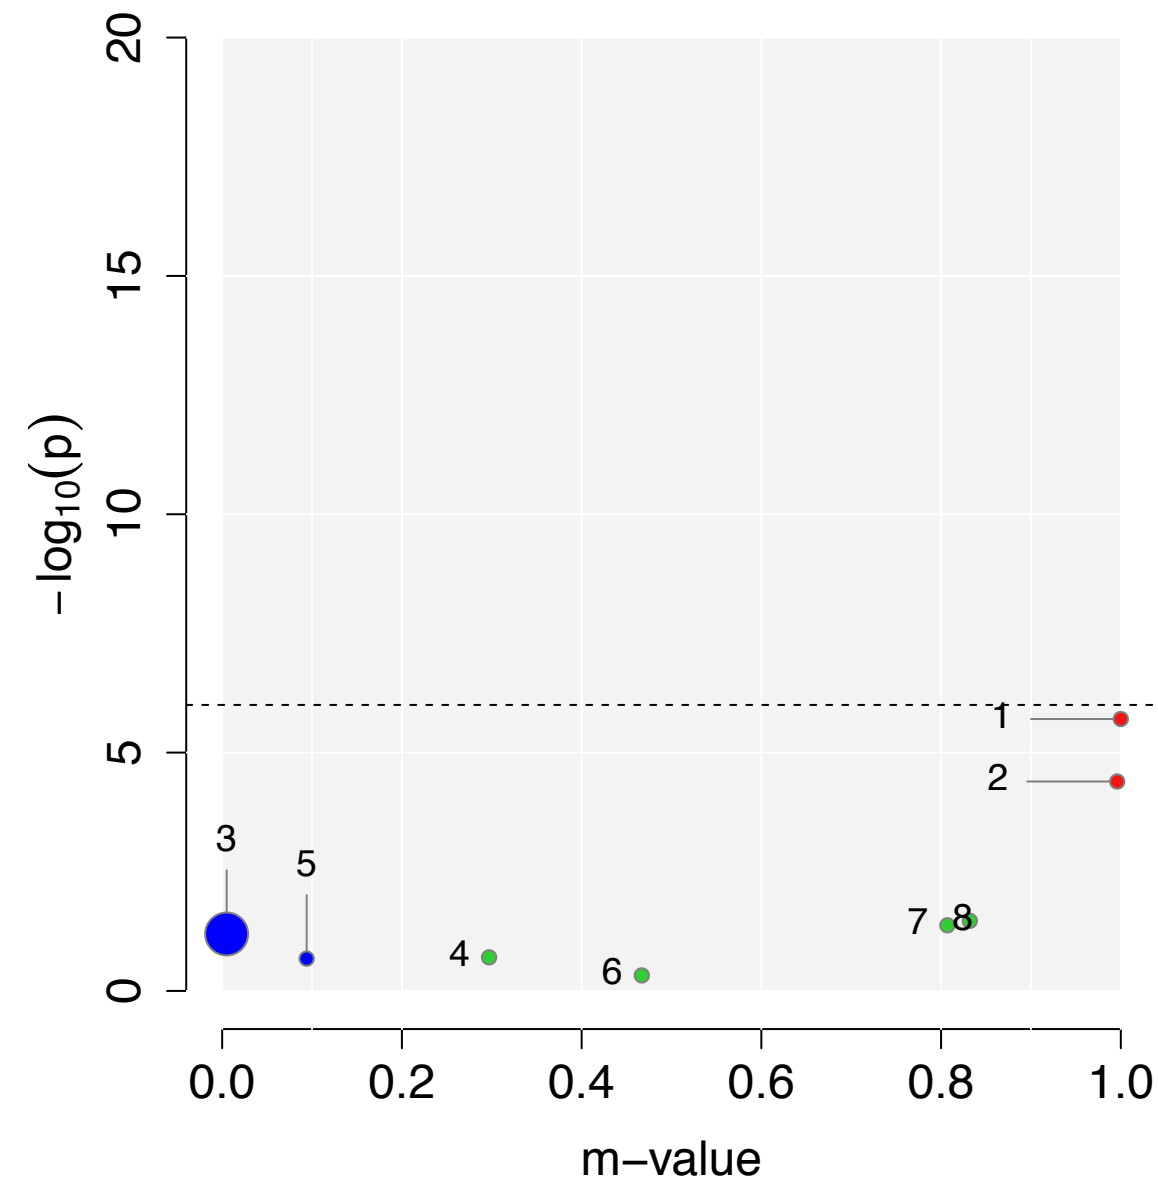

# rs8084351 (Meta $P = 4.26 \times 10^{-12}$ )

Gene : *DCC*

## GWAS P-value

- 3.80 x 10<sup>-5</sup> ● 1.SCZ
- 0.0365 ● 2.BIP
- 4.26 x 10<sup>-8</sup> ● 3.MD
- 0.0292 ● 4.ASD
- 0.0004 ● 5.ADHD
- 0.0017 ● 6.TS
- 0.3089 ● 7.ANO
- 0.0406 ● 8.OCD

FE summary

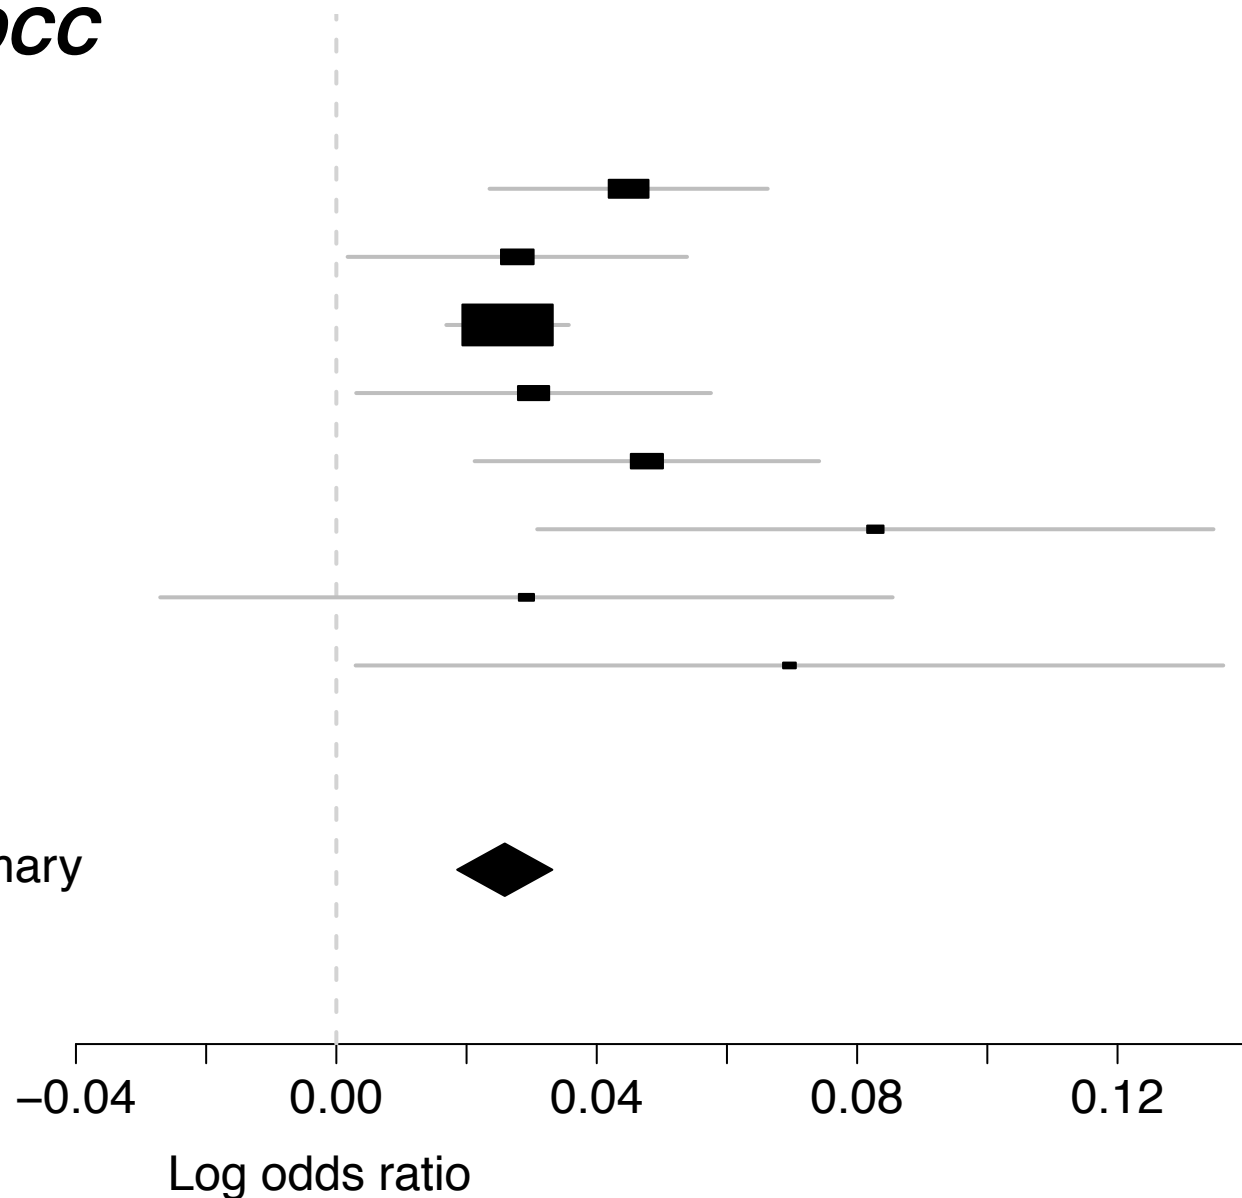

## PM-Plot

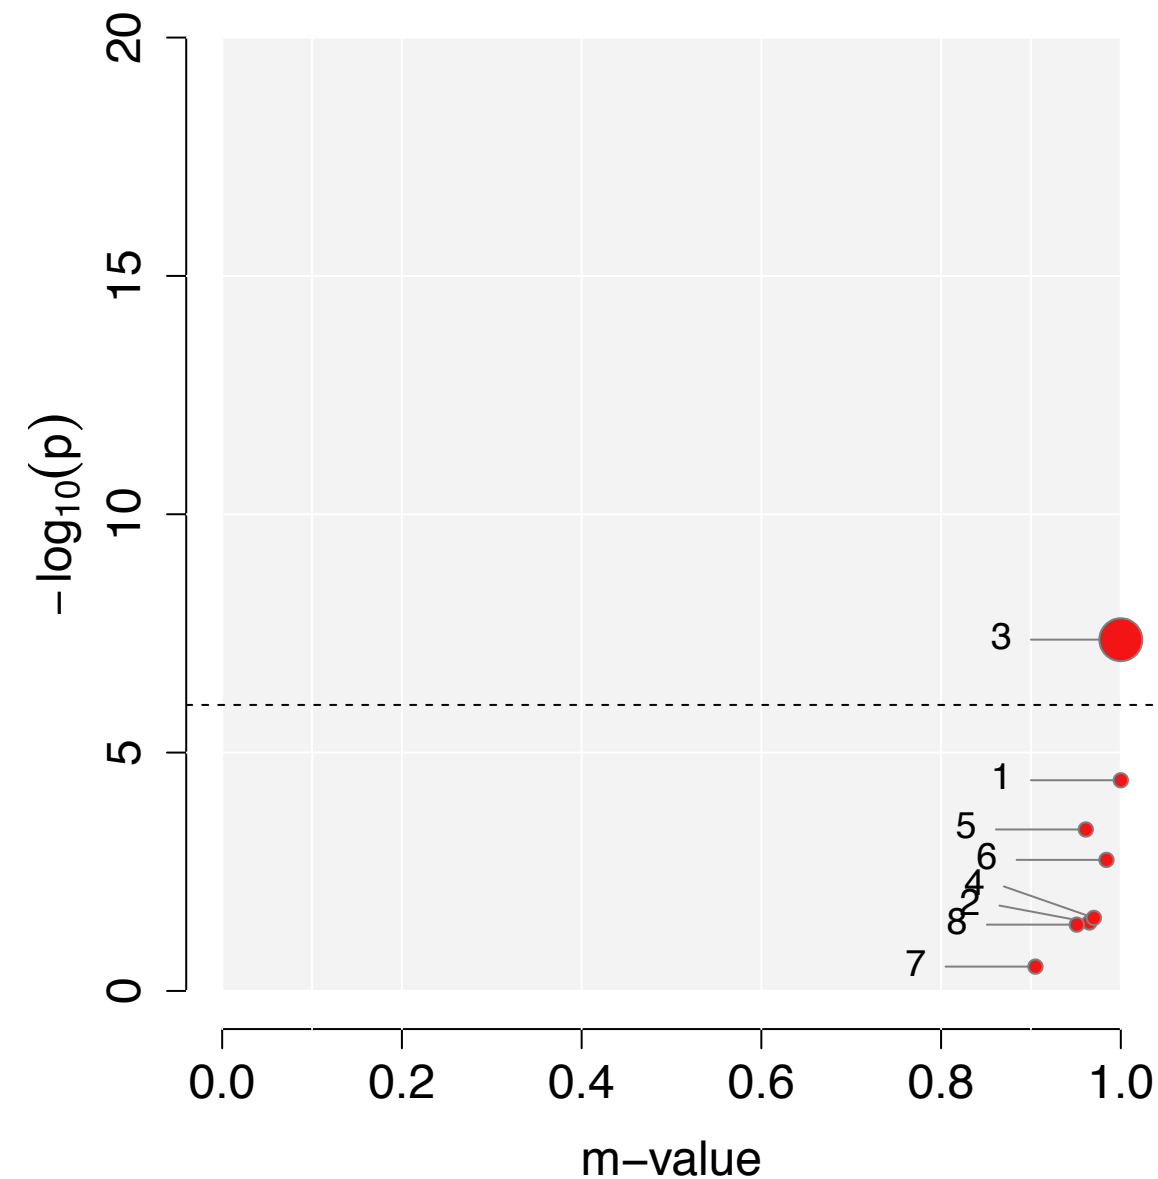

# rs9360557 (Meta $P = 3.04 \times 10^{-9}$ )

Gene : *RIMS1*

## GWAS P-value

- 6.60 x 10<sup>-8</sup> ● 1.SCZ
- 0.0053 ● 2.BIP
- 4.97 x 10<sup>-5</sup> ● 3.MD
- 0.0128 ● 4.ASD
- 0.0454 ● 5.ADHD
- 0.3447 ● 6.TS
- 0.0434 ● 7.ANO
- 0.2894 ● 8.OCD

FE summary

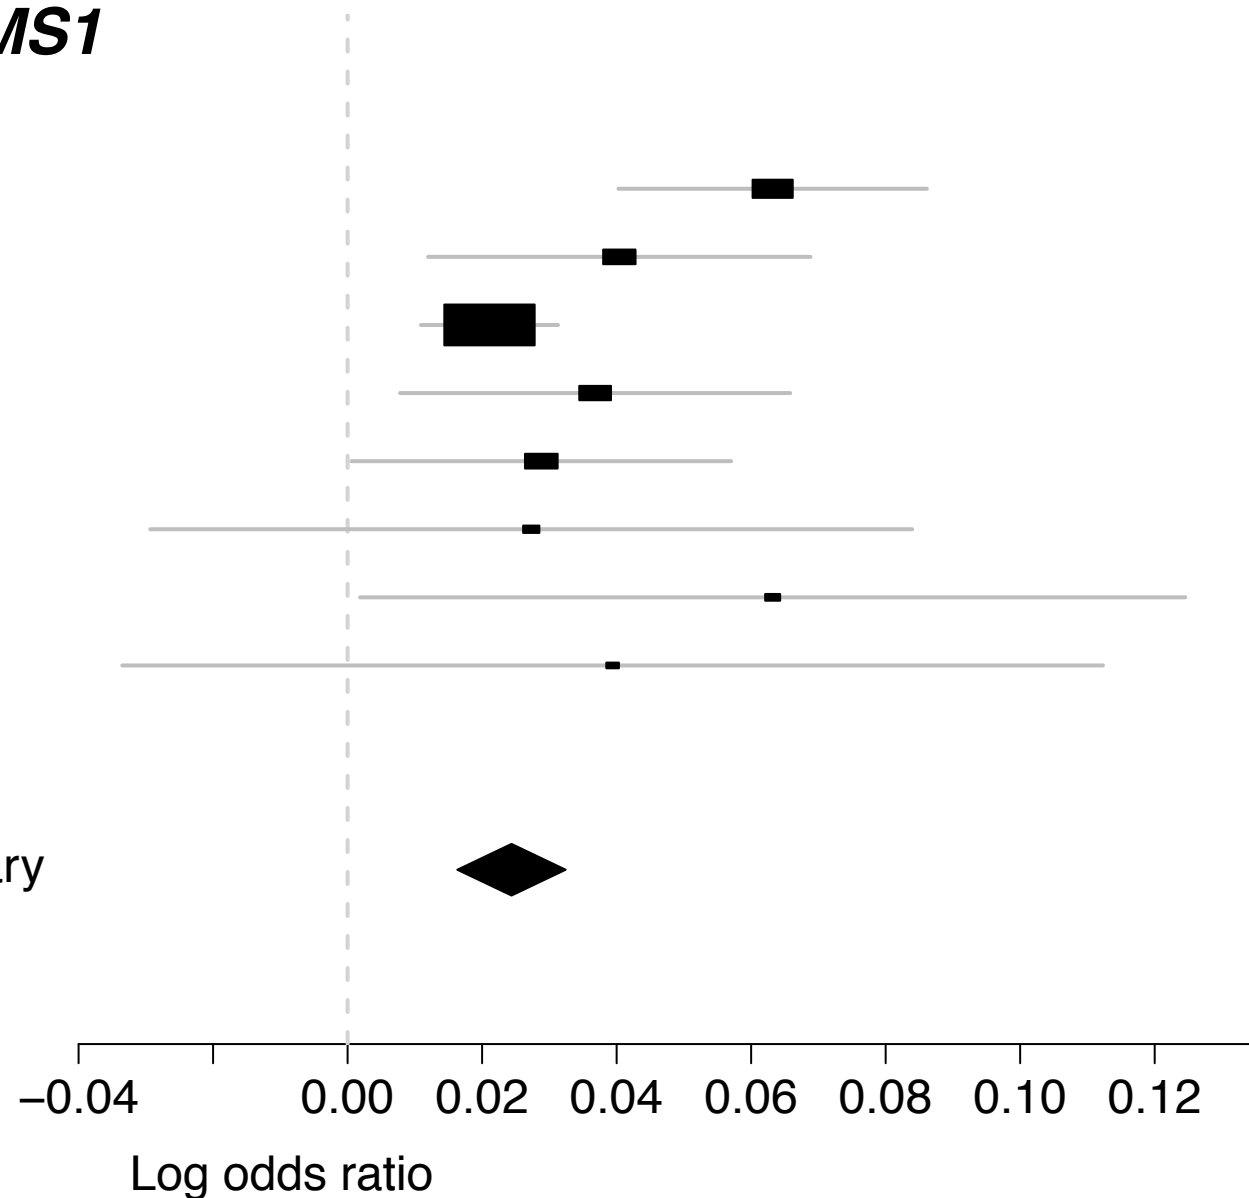

## PM-Plot

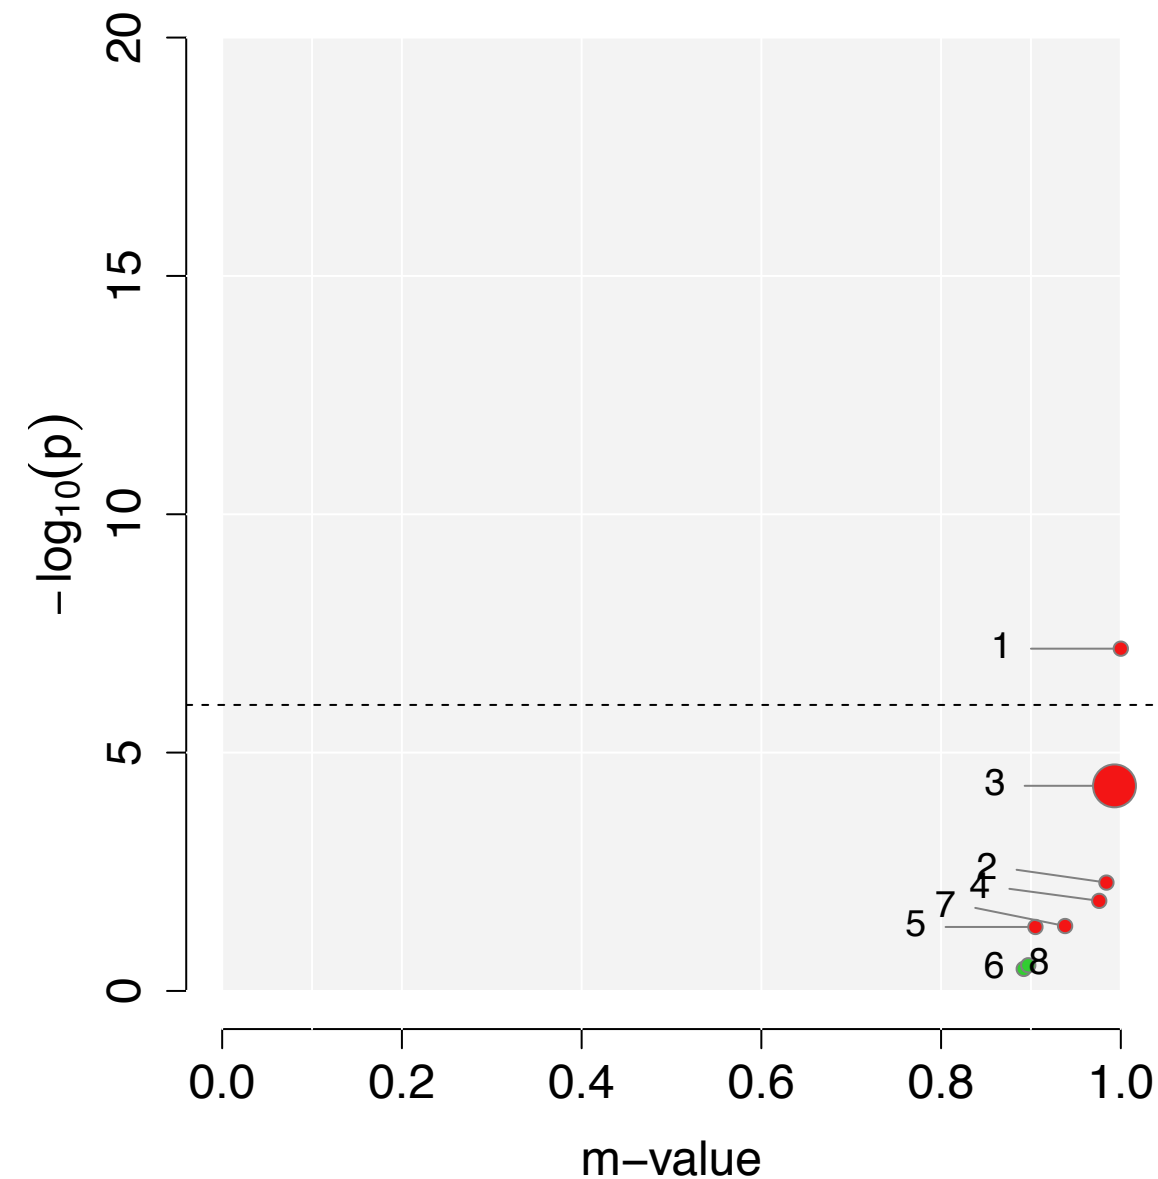

# rs9636107 (Meta $P = 3.03 \times 10^{-10}$ )

Gene : *TCF4*

## GWAS P-value

- 1.70 x 10<sup>-13</sup> ● 1.SCZ
- 0.1960 ● 2.BIP
- 0.0020 ● 3.MD
- 0.1739 ● 4.ASD
- 0.9055 ● 5.ADHD
- 0.4039 ● 6.TS
- 0.2016 ● 7.ANO
- 0.7071 ● 8.OCD

FE summary

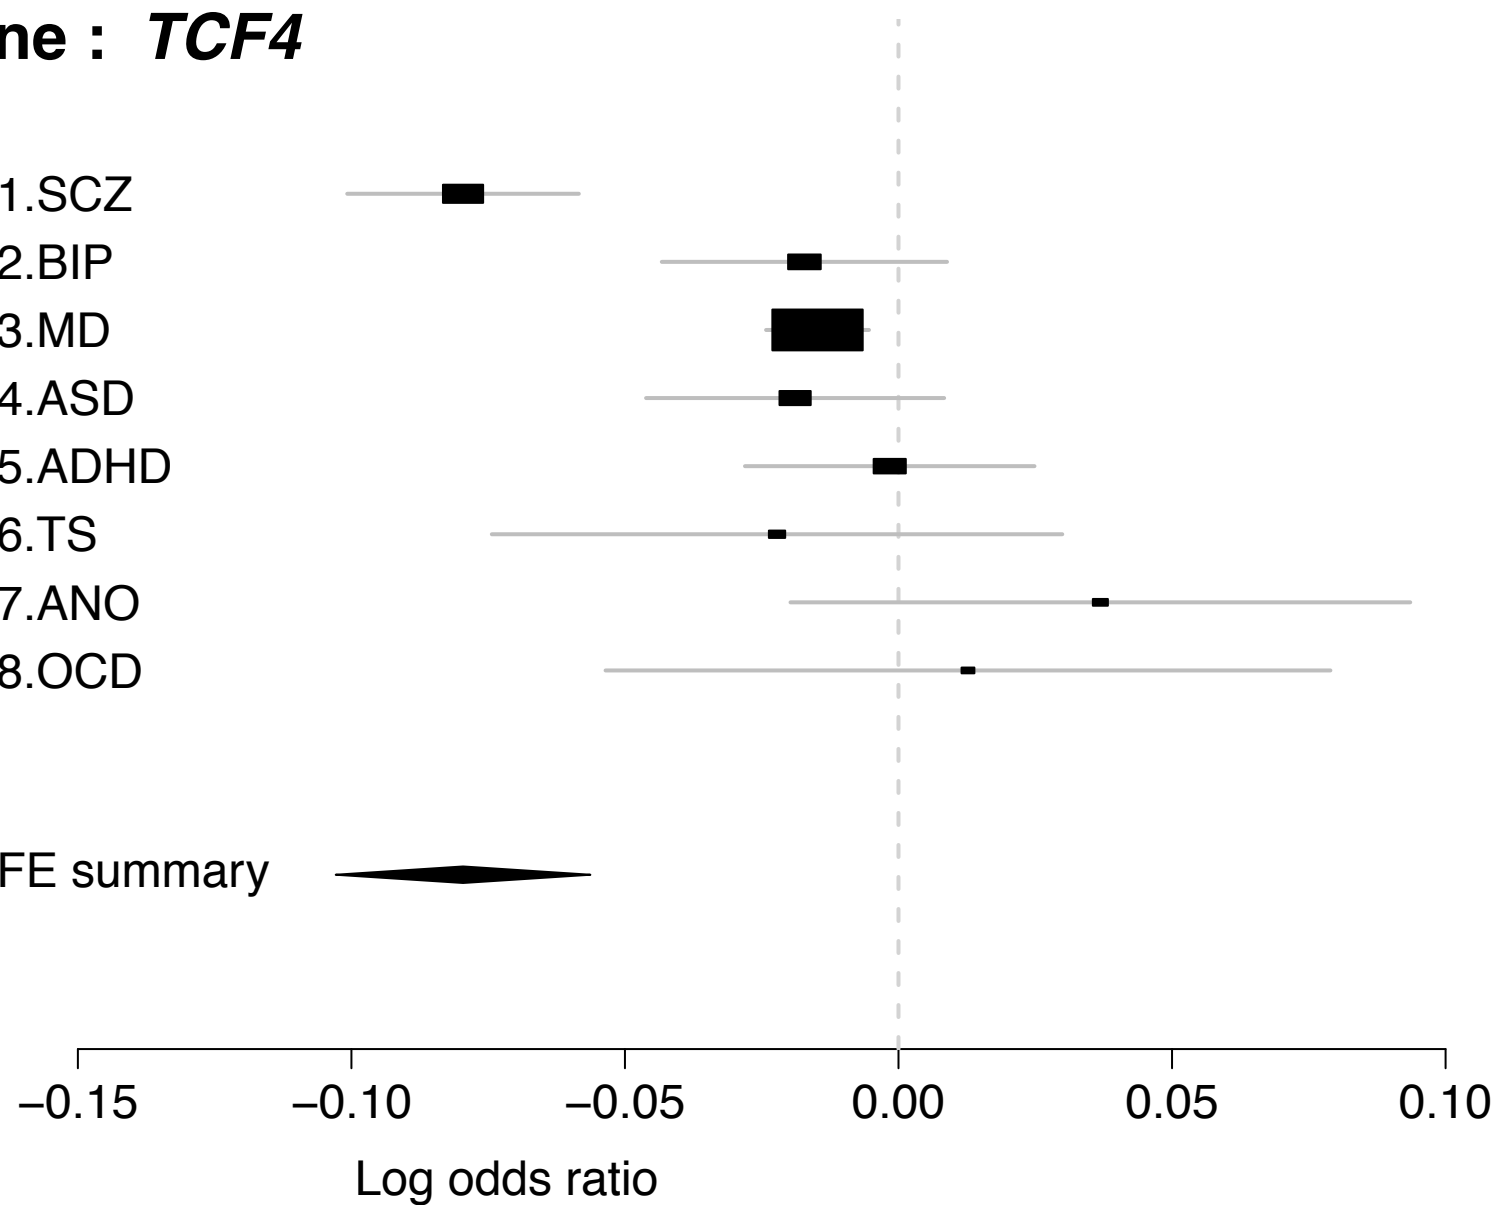

## PM-Plot

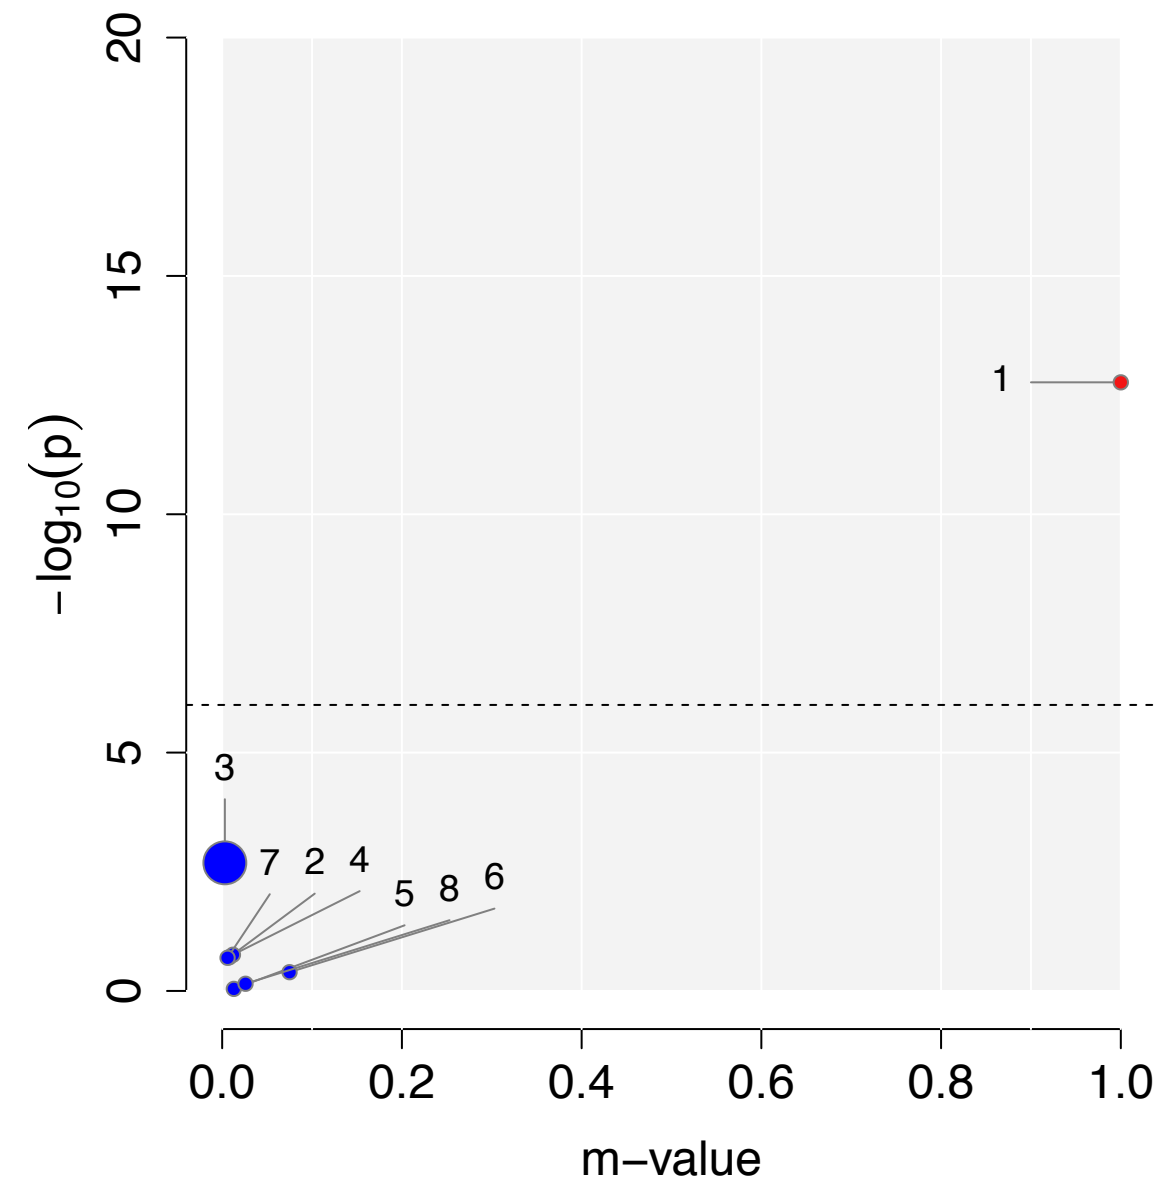

# rs9677504 (Meta $P = 7.26 \times 10^{-9}$ )

Gene : *SPAG16*, *VWC2L*

## GWAS P-value

- 0.5524 ● 1.SCZ
- 0.1810 ● 2.BIP
- 0.0345 ● 3.MD
- 0.1150 ● 4.ASD
- $9.90 \times 10^{-8}$  ● 5.ADHD
- 0.0097 ● 6.TS
- 0.7504 ● 7.ANO
- 0.0013 ● 8.OCD

FE summary

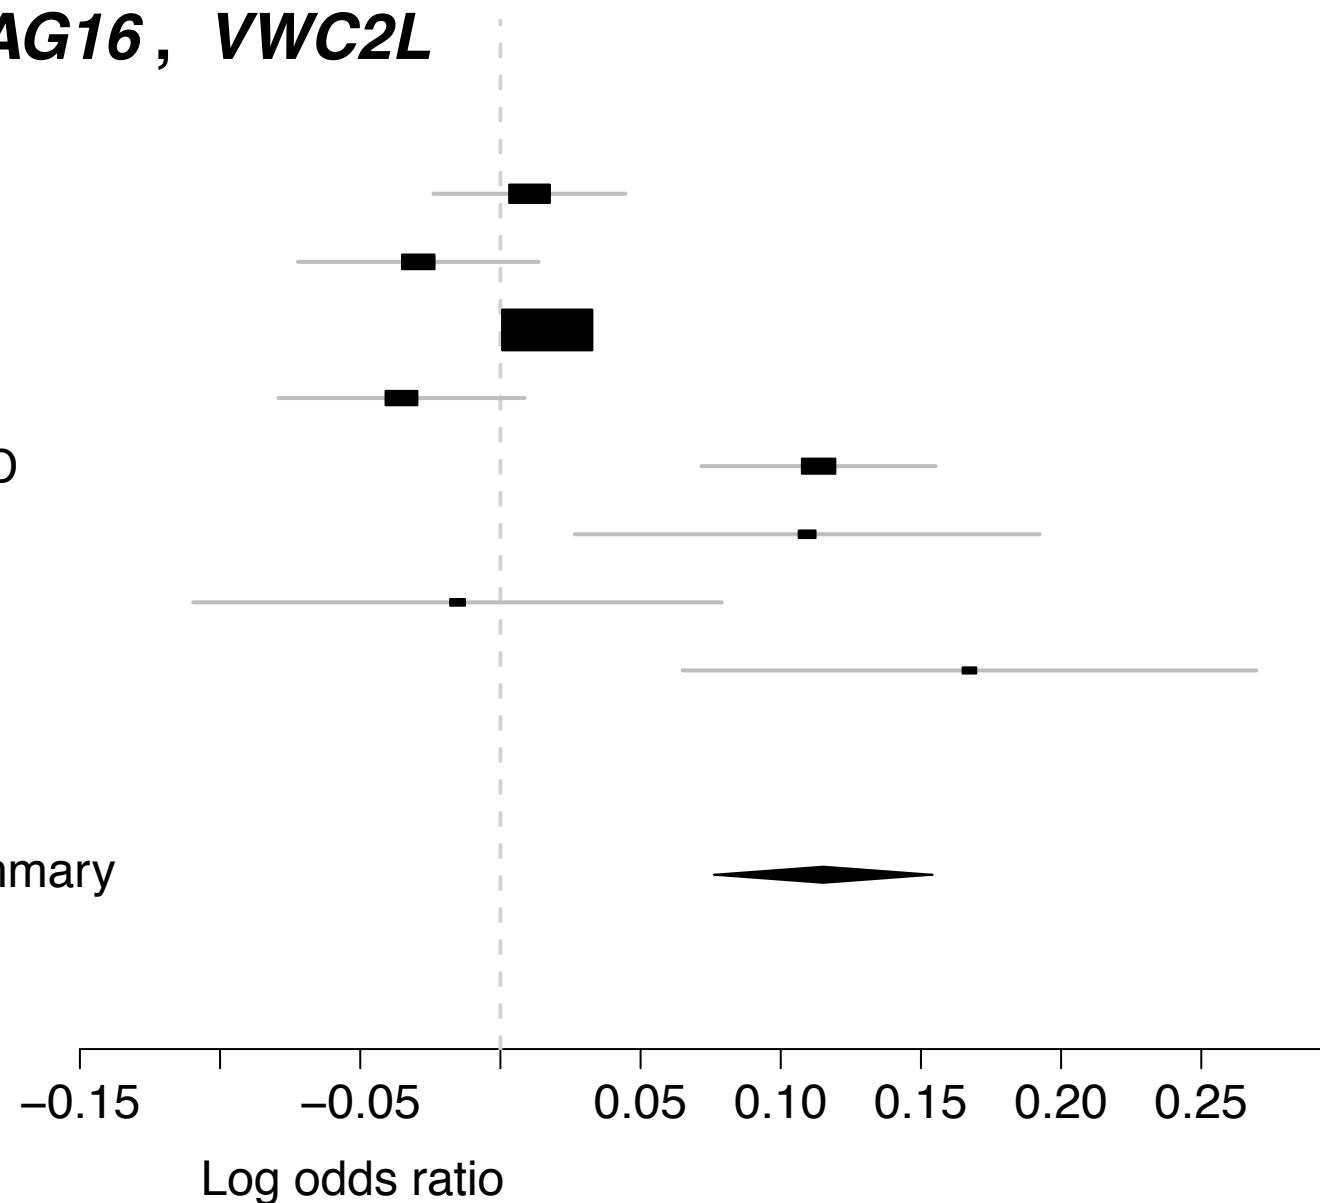

## PM-Plot

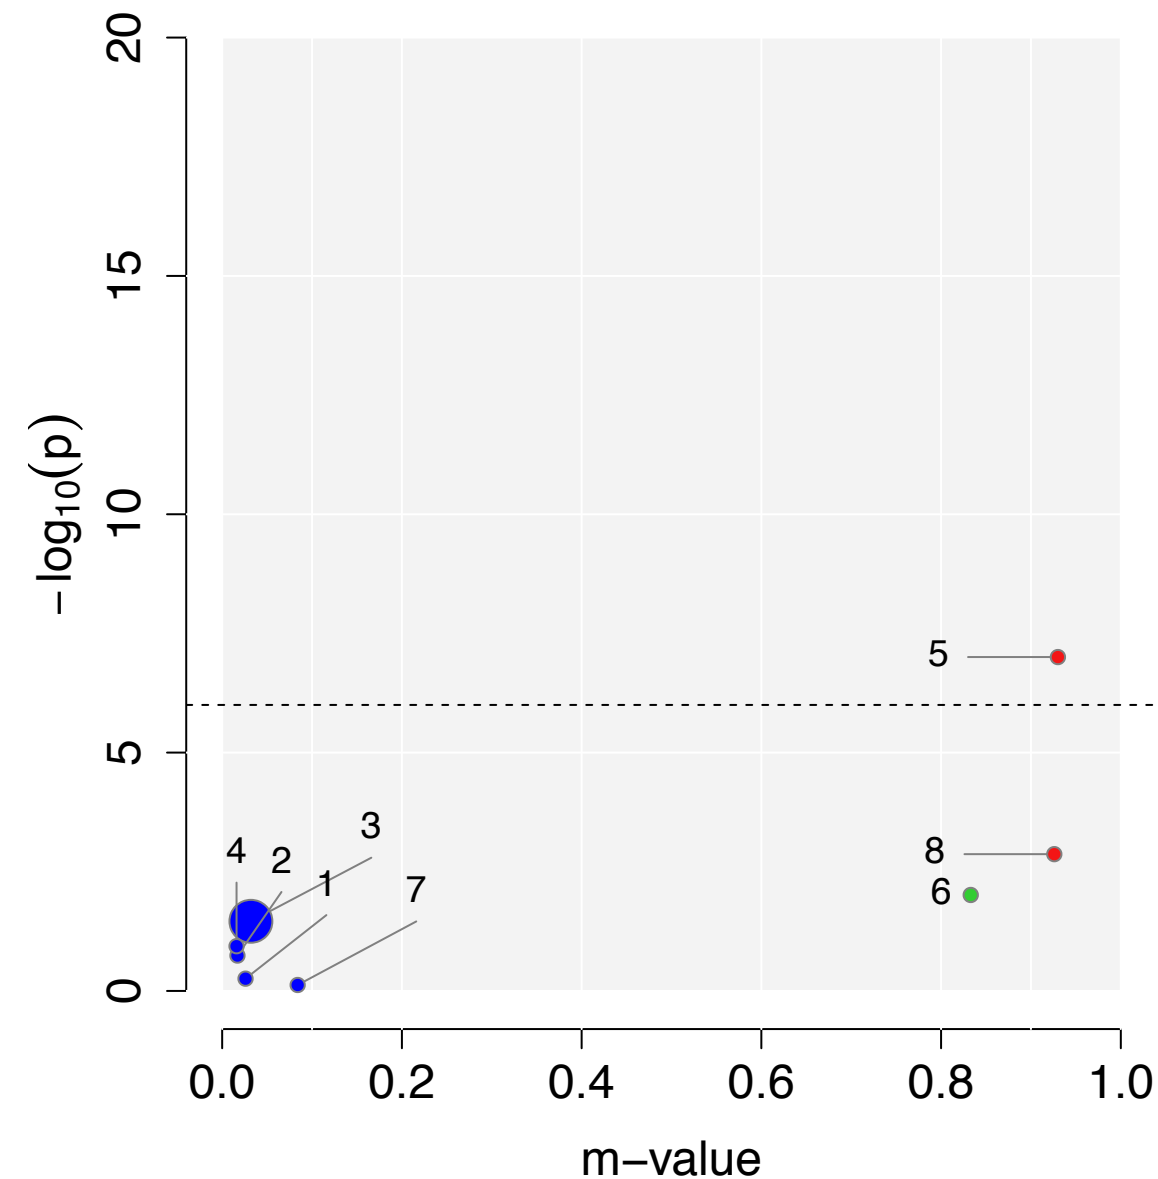

rs9787523 (Meta  $P = 3.57 \times 10^{-10}$ )

Gene : **SORCS3**

GWAS P-value

- 0.0001 ● 1.SCZ
- 0.2015 ● 2.BIP
- $1.94 \times 10^{-7}$  ● 3.MD
- 0.0160 ● 4.ASD
- 0.0006 ● 5.ADHD
- 0.0108 ● 6.TS
- 0.5407 ● 7.ANO
- 0.6047 ● 8.OCD

FE summary

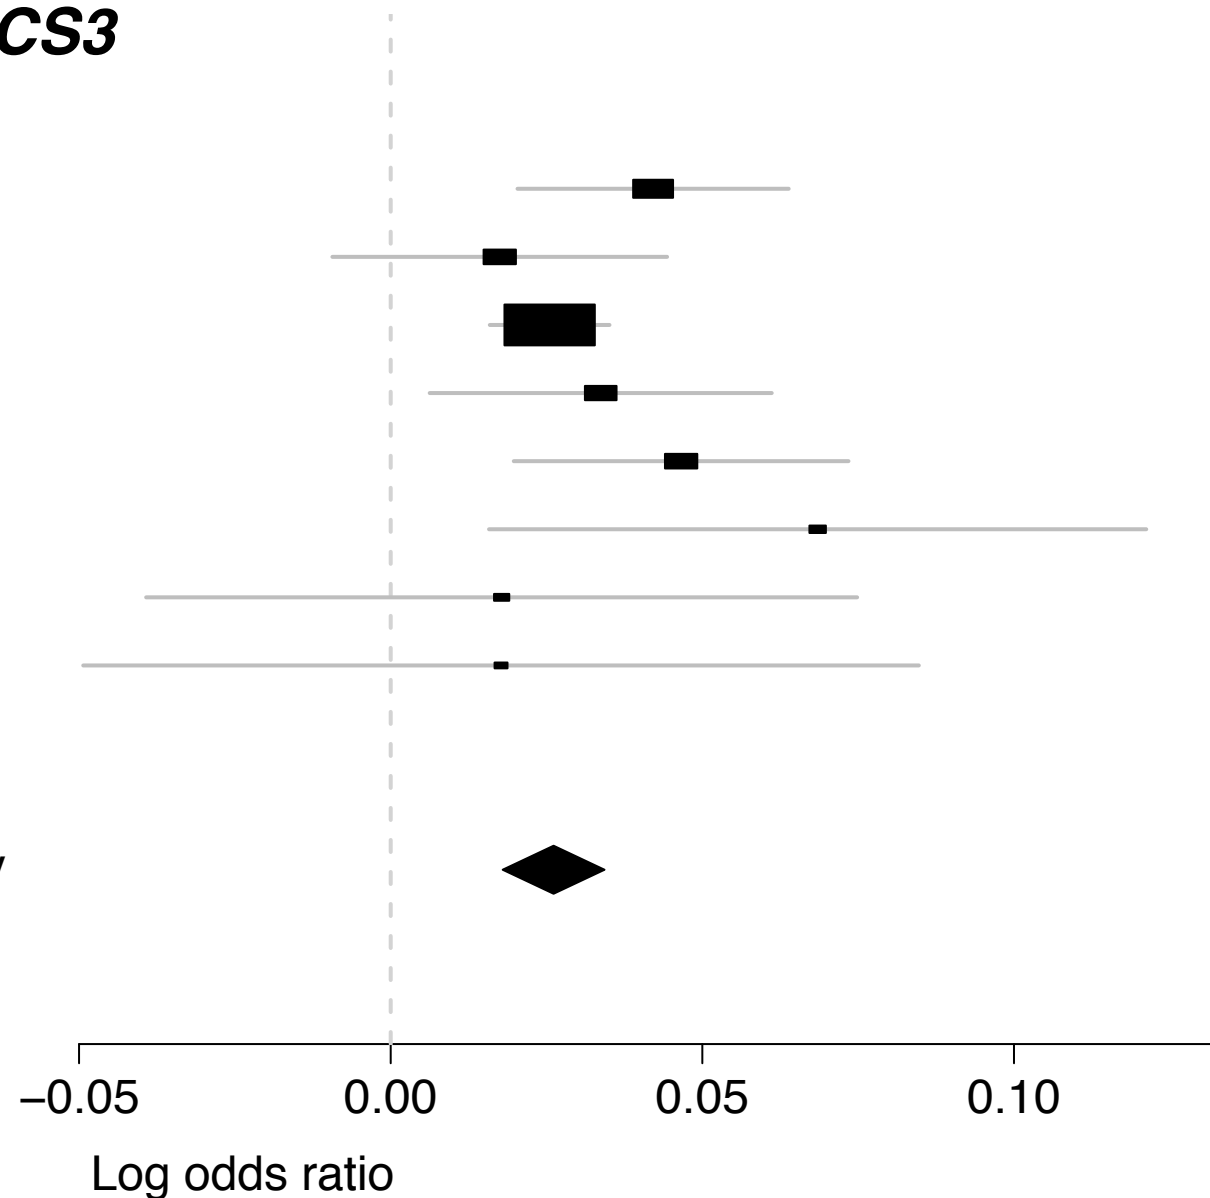

PM-Plot

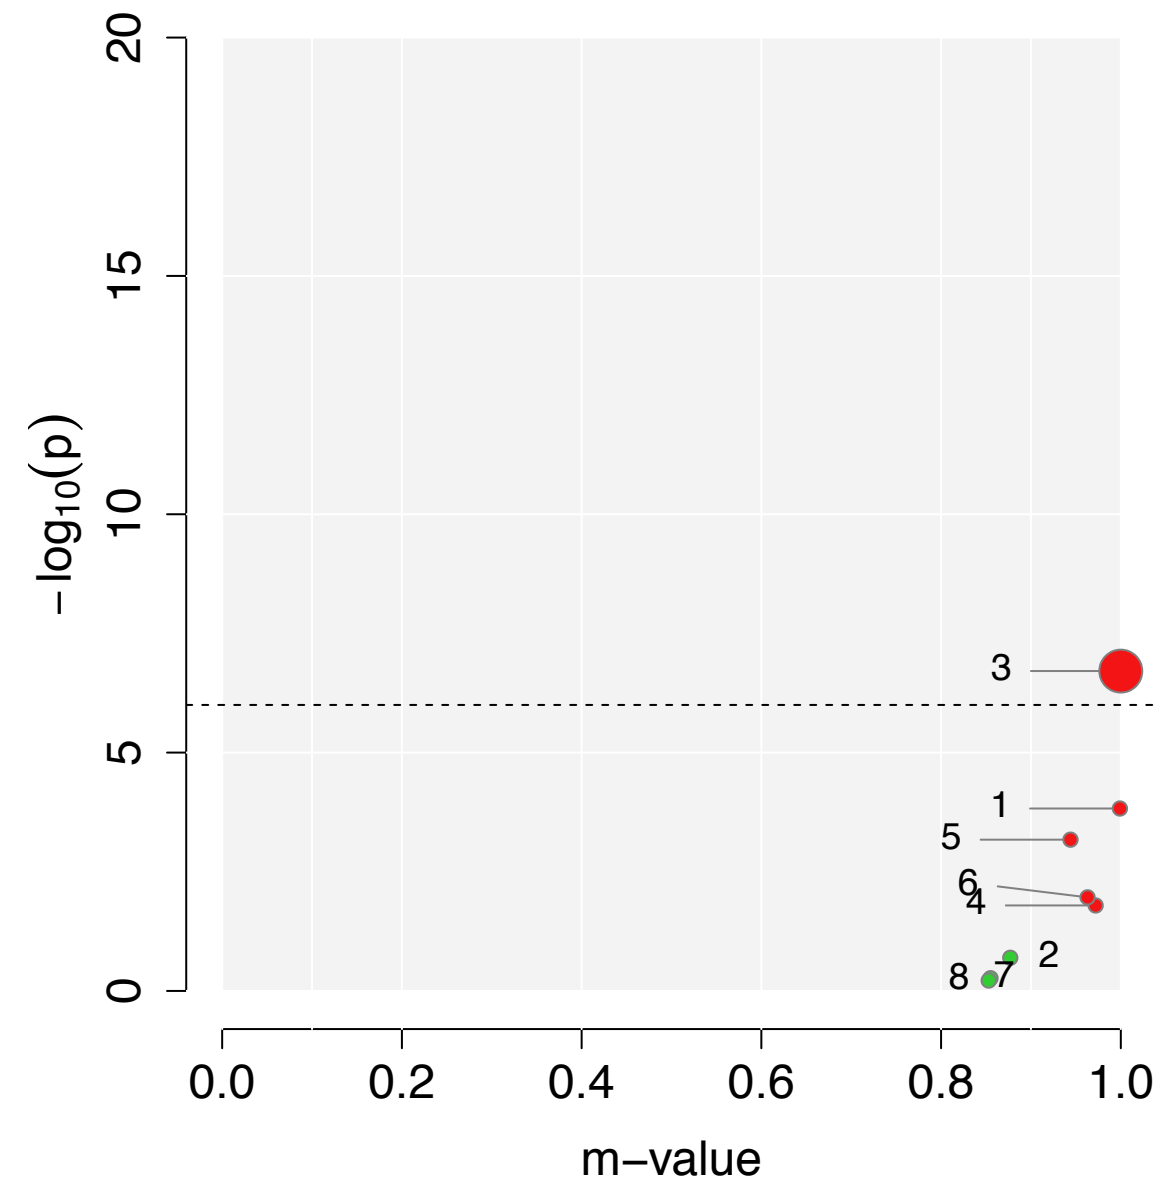

rs9834970 (Meta  $P = 1.83 \times 10^{-17}$ )

Gene : *TRANK1* , *DCLK3*

GWAS P-value

- 5.53 x 10<sup>-10</sup> ● 1.SCZ
- 4.78 x 10<sup>-4</sup> ● 2.BIP
- 0.2076 ● 3.MD
- 0.3574 ● 4.ASD
- 0.0990 ● 5.ADHD
- 0.1644 ● 6.TS
- 0.8789 ● 7.ANO
- 0.0060 ● 8.OCD

FE summary

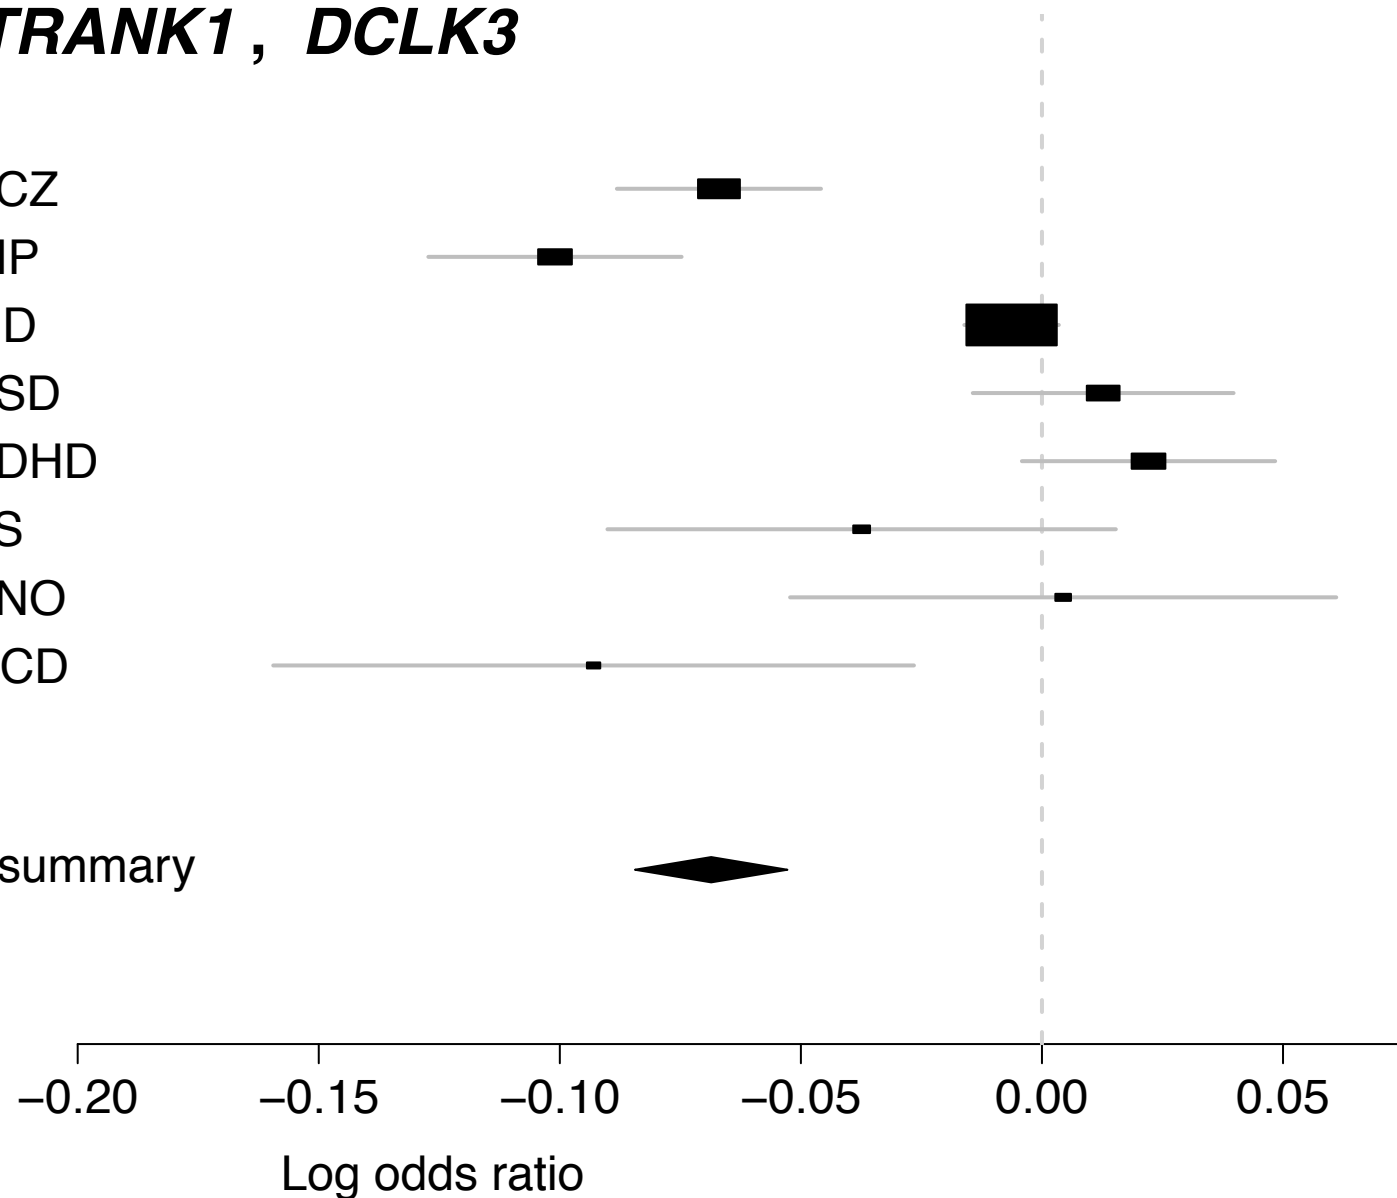

PM-Plot

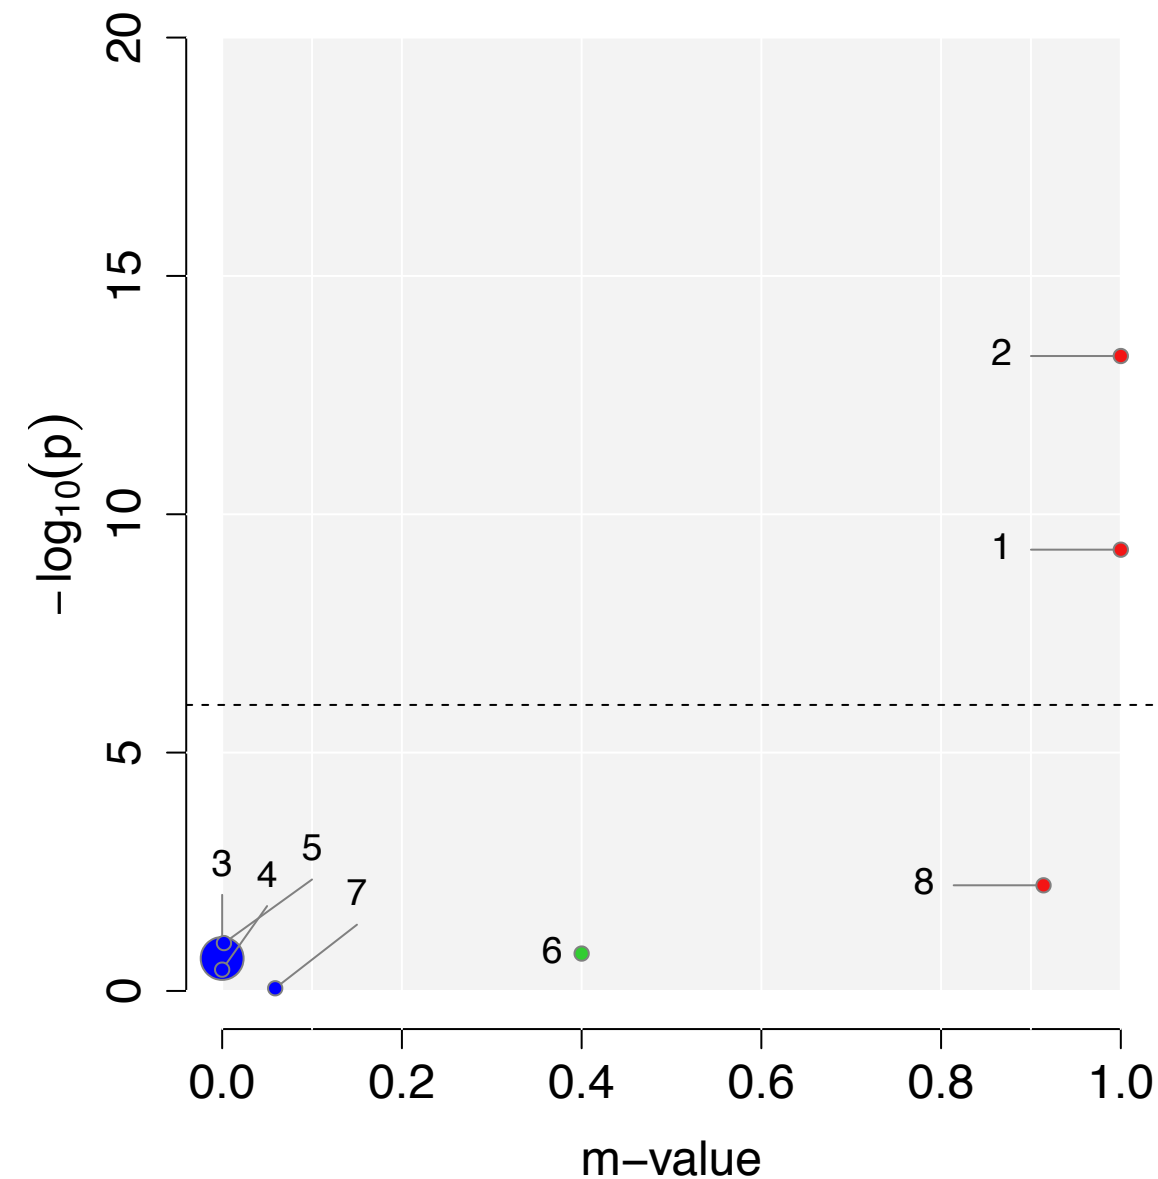



# rs9922678 (Meta $P = 2.52 \times 10^{-10}$ )

Gene : *GRIN2A*

## GWAS P-value

- 6.77 x 10<sup>-9</sup> ● 1.SCZ
- 1.28 x 10<sup>-6</sup> ● 2.BIP
- 0.2735 ● 3.MD
- 0.0844 ● 4.ASD
- 0.1867 ● 5.ADHD
- 0.8658 ● 6.TS
- 0.1287 ● 7.ANO
- 0.2626 ● 8.OCD

FE summary

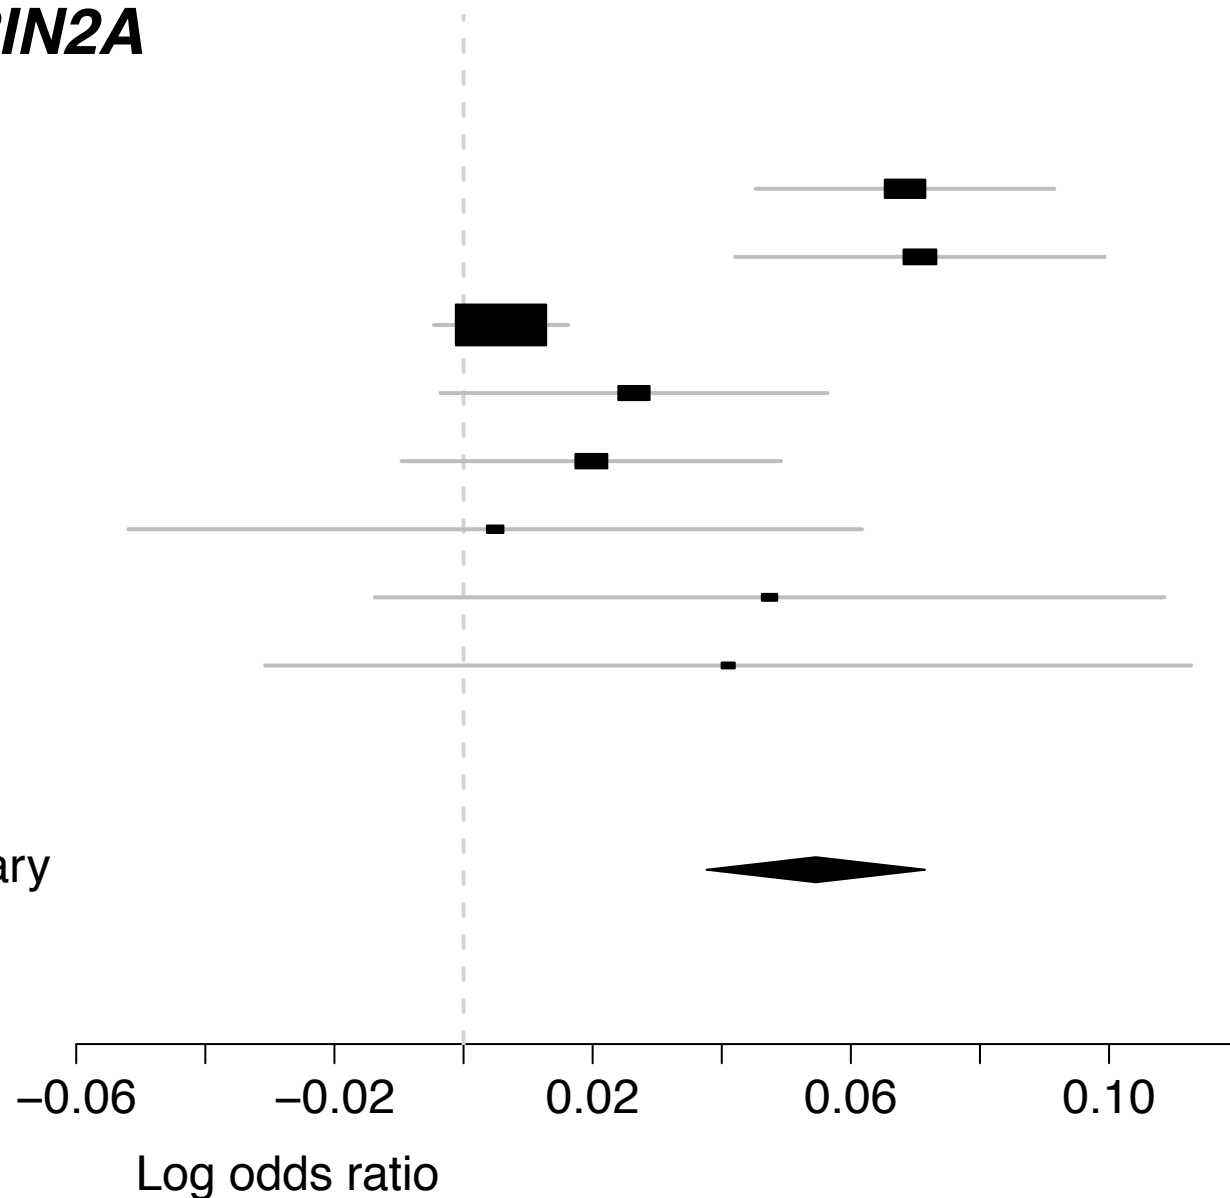

## PM-Plot

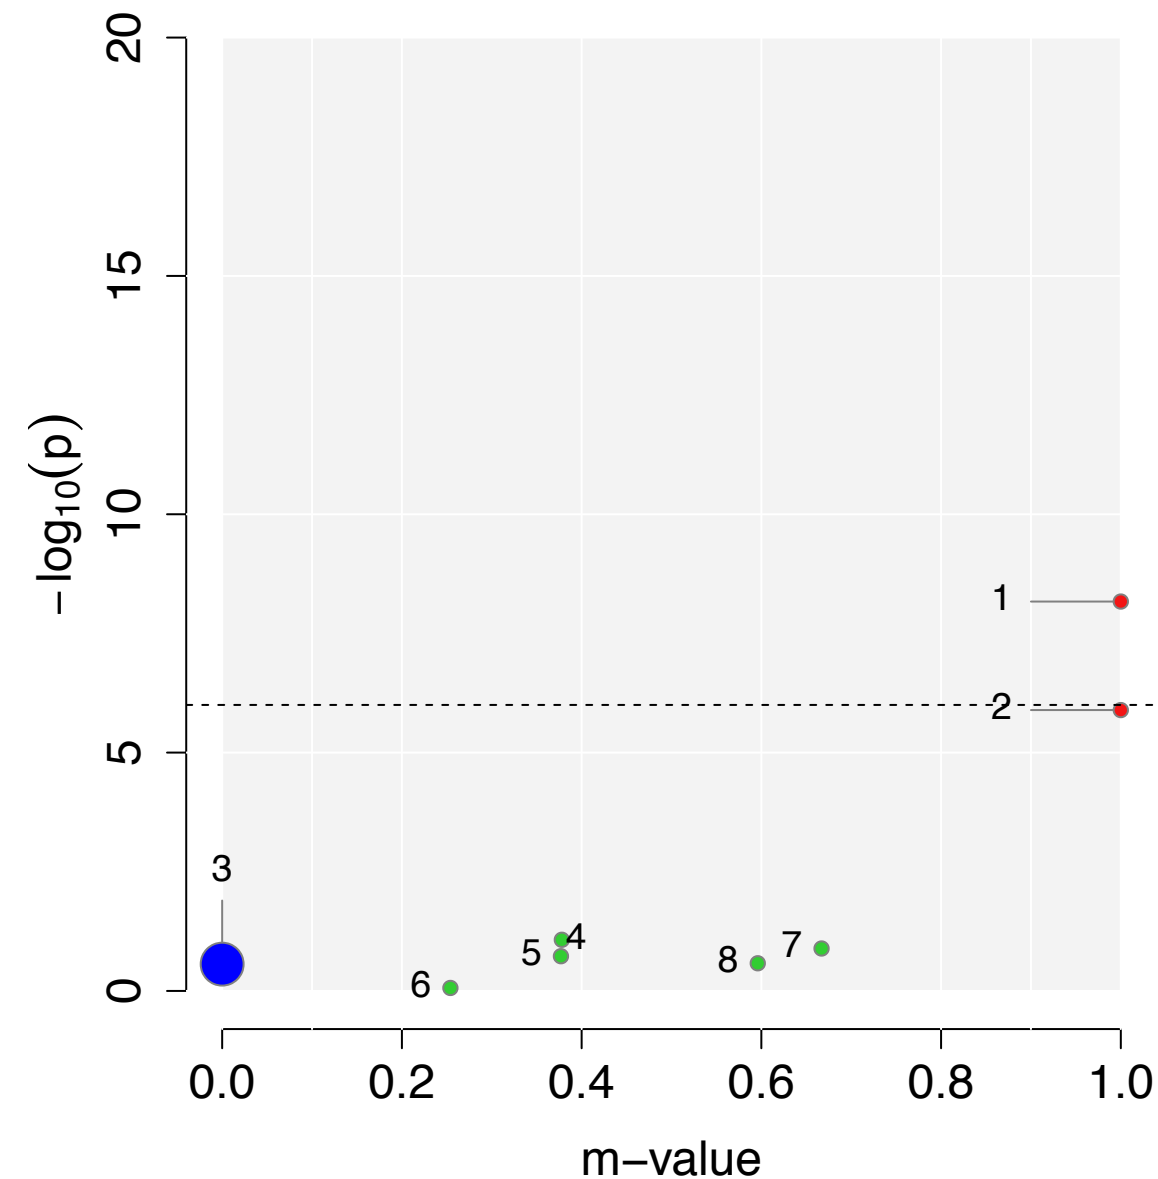

rs10043984 (Meta  $P = 1.9e \times 10^{-9}$ )

Gene : *KDM3B*, *FAM53C*

GWAS P-value

- 1.30 x 10<sup>-7</sup> ● 1.SCZ
- 3.33 x 10<sup>-6</sup> ● 2.BIP
- 0.0810 ● 3.MD
- 0.0415 ● 4.ASD
- 0.1649 ● 5.ADHD
- 0.0686 ● 6.TS
- 0.3263 ● 7.ANO
- 0.0160 ● 8.OCD

FE summary

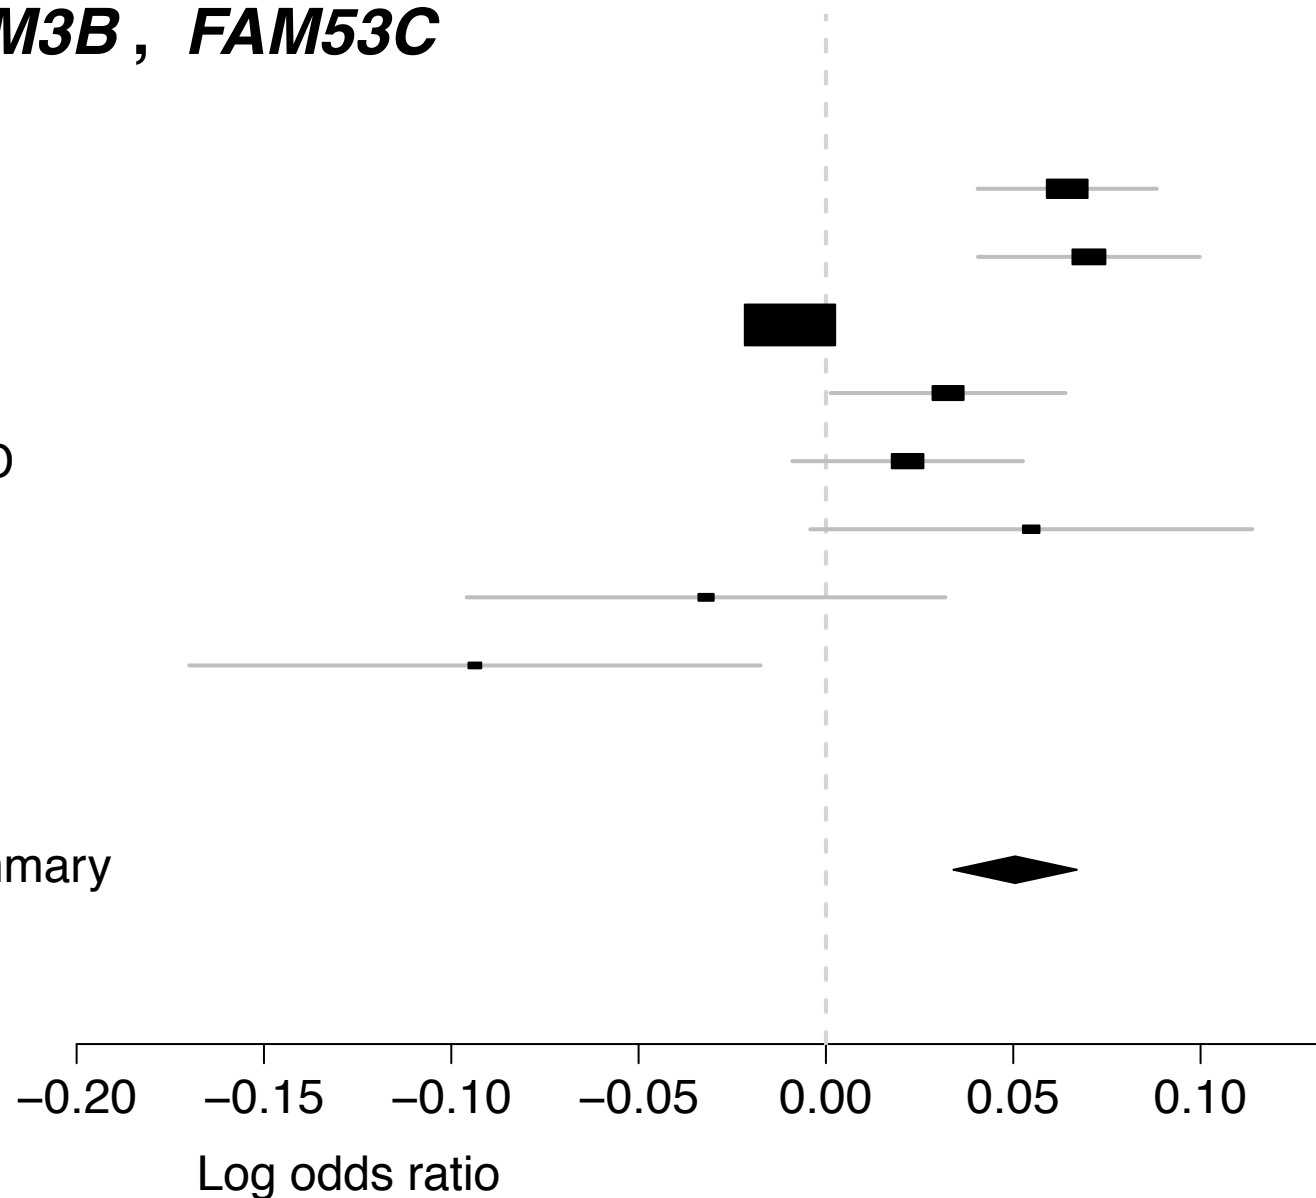

PM-Plot

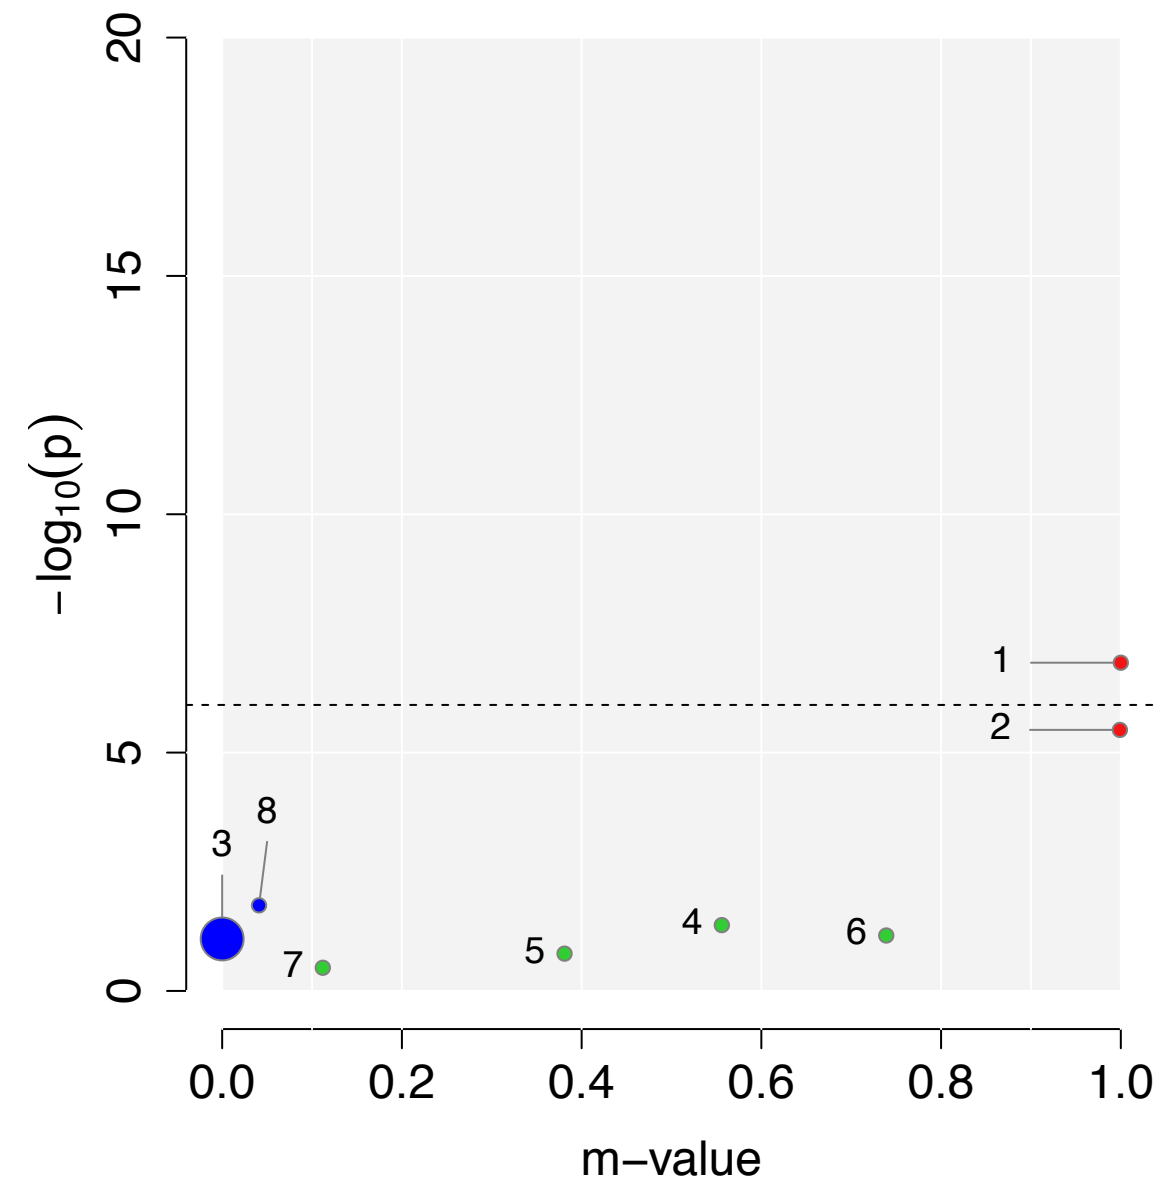

# rs10108980 (Meta $P = 4.15 \times 10^{-10}$ )

Gene : *CSMD1*

## GWAS P-value

- 3.56 x 10<sup>-8</sup> ● 1.SCZ
- 0.8808 ● 2.BIP
- 0.4735 ● 3.MD
- 0.8105 ● 4.ASD
- 0.7088 ● 5.ADHD
- 0.0003 ● 6.TS
- 0.0009 ● 7.ANO
- 0.3406 ● 8.OCD

FE summary

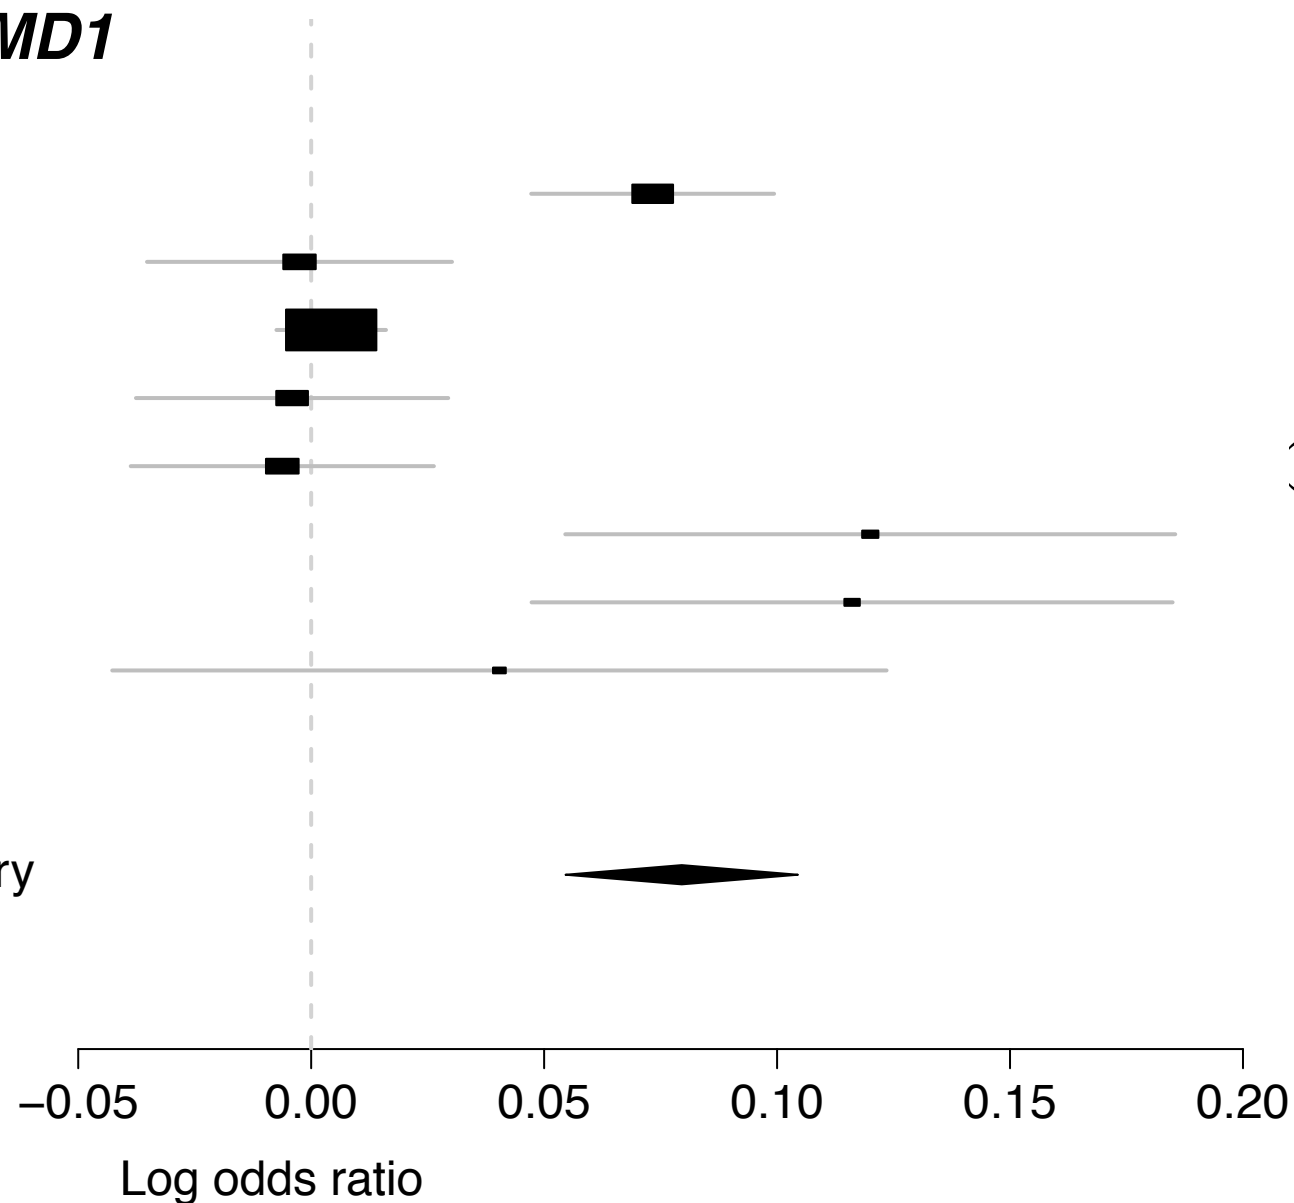

## PM-Plot

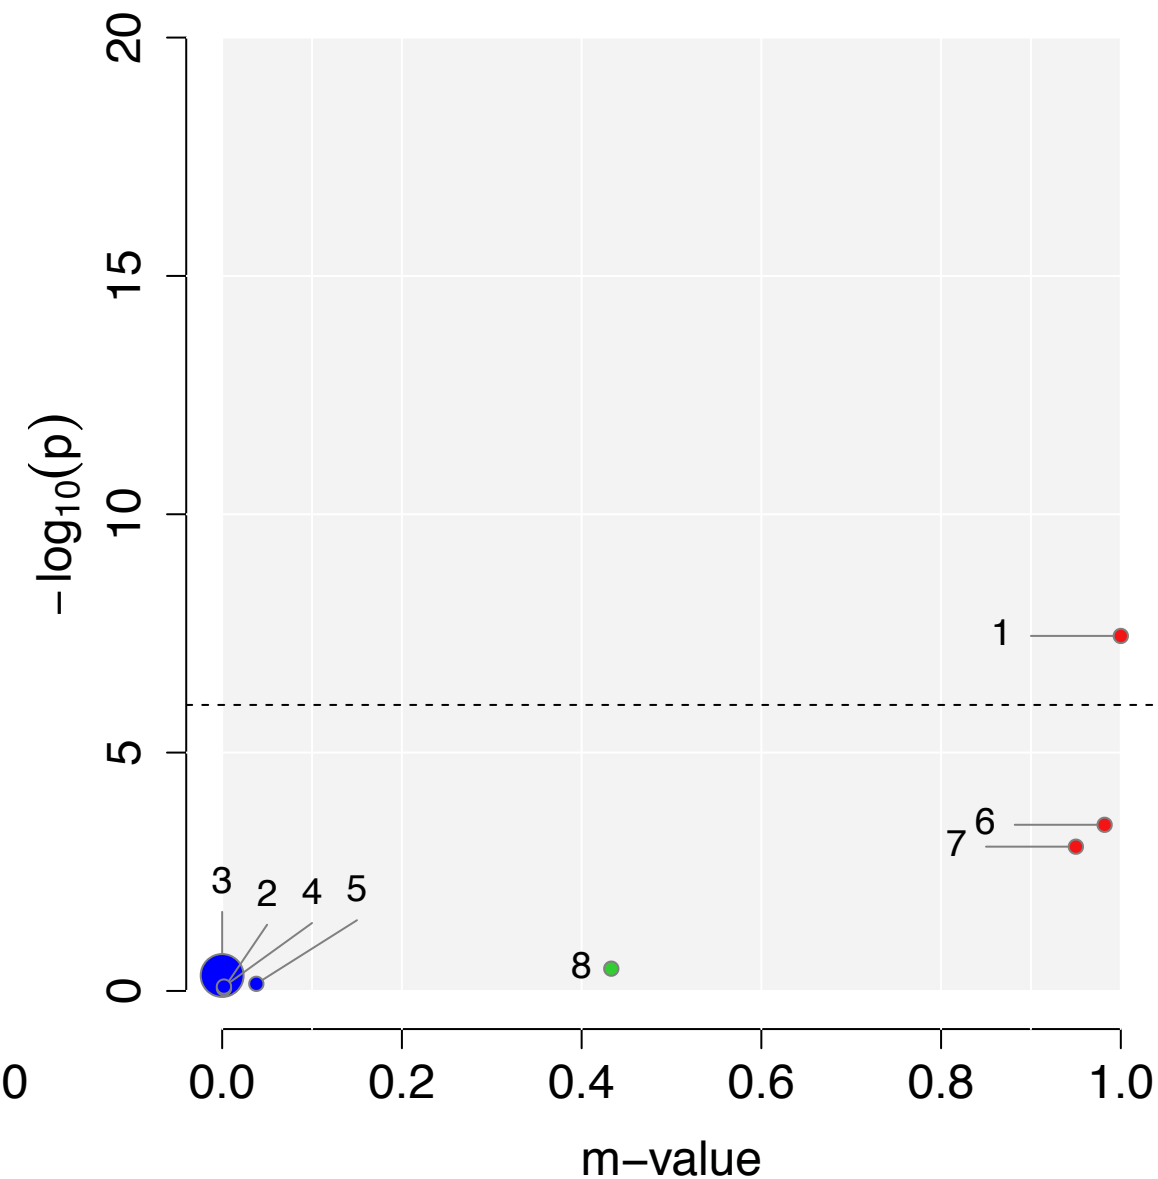

# rs10149470 (Meta $P = 4.8e \times 10^{-13}$ )

Gene : *BAG5*, *APOPT1*

## GWAS P-value

- 0.0008 ● 1.SCZ
- 0.0105 ● 2.BIP
- $3.26 \times 10^{-9}$  ● 3.MD
- $8.75 \times 10^{-5}$  ● 4.ASD
- 0.2713 ● 5.ADHD
- 0.0083 ● 6.TS
- 0.6941 ● 7.ANO
- 0.4682 ● 8.OCD

FE summary

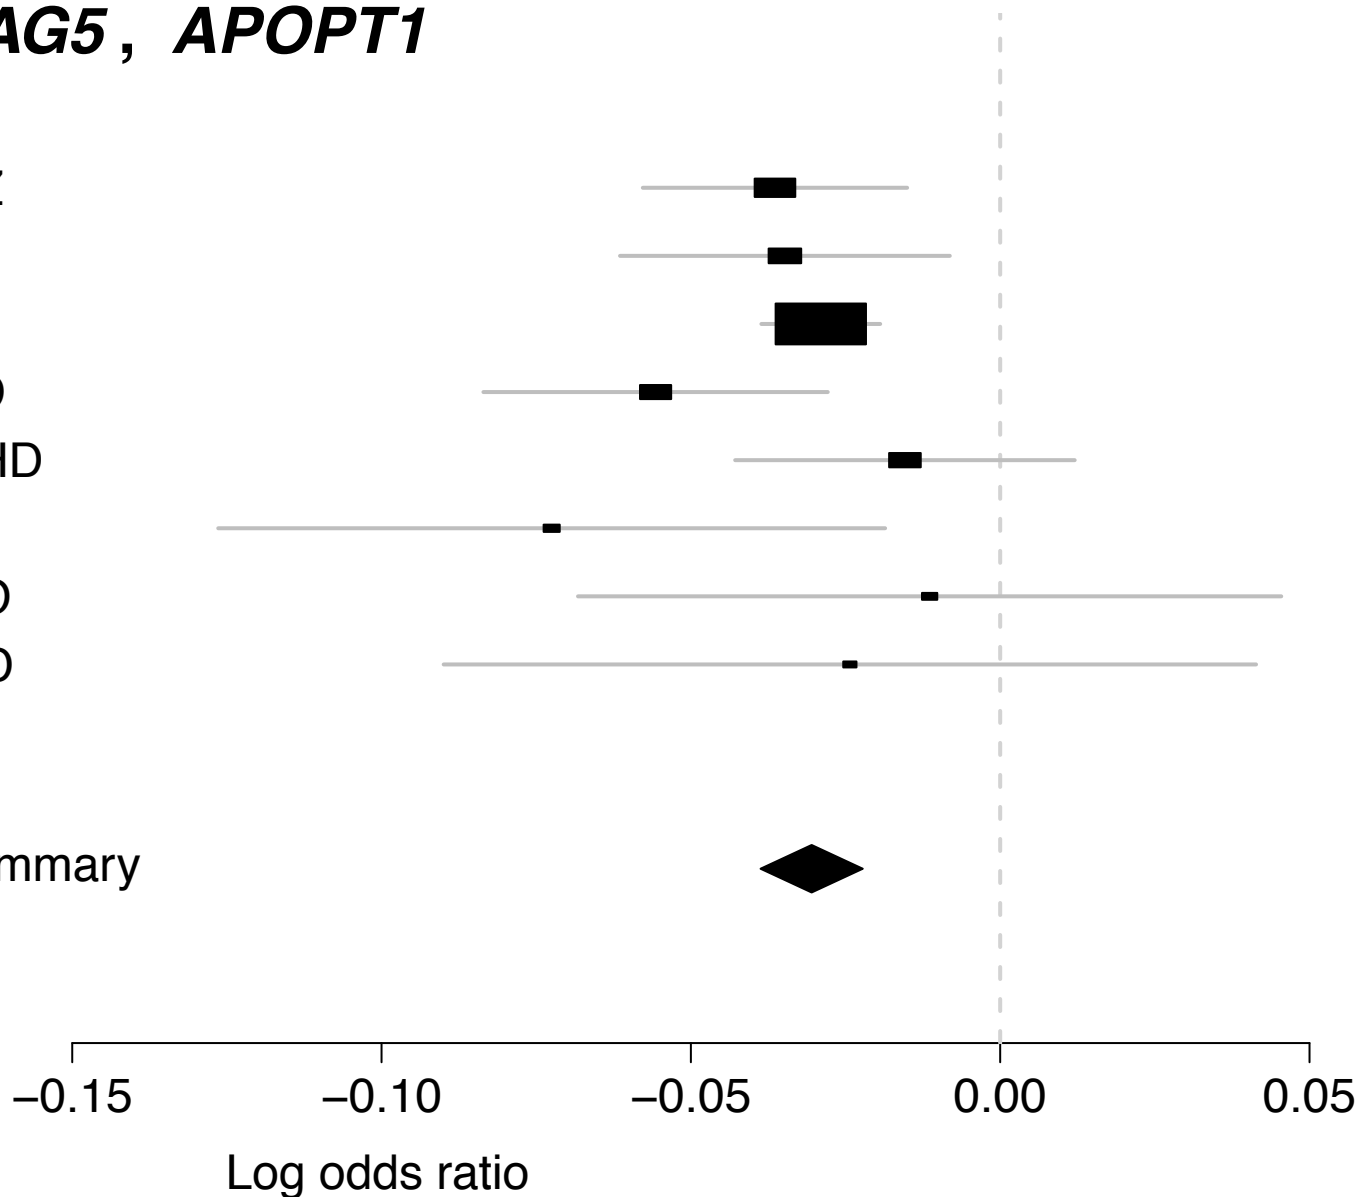

## PM-Plot

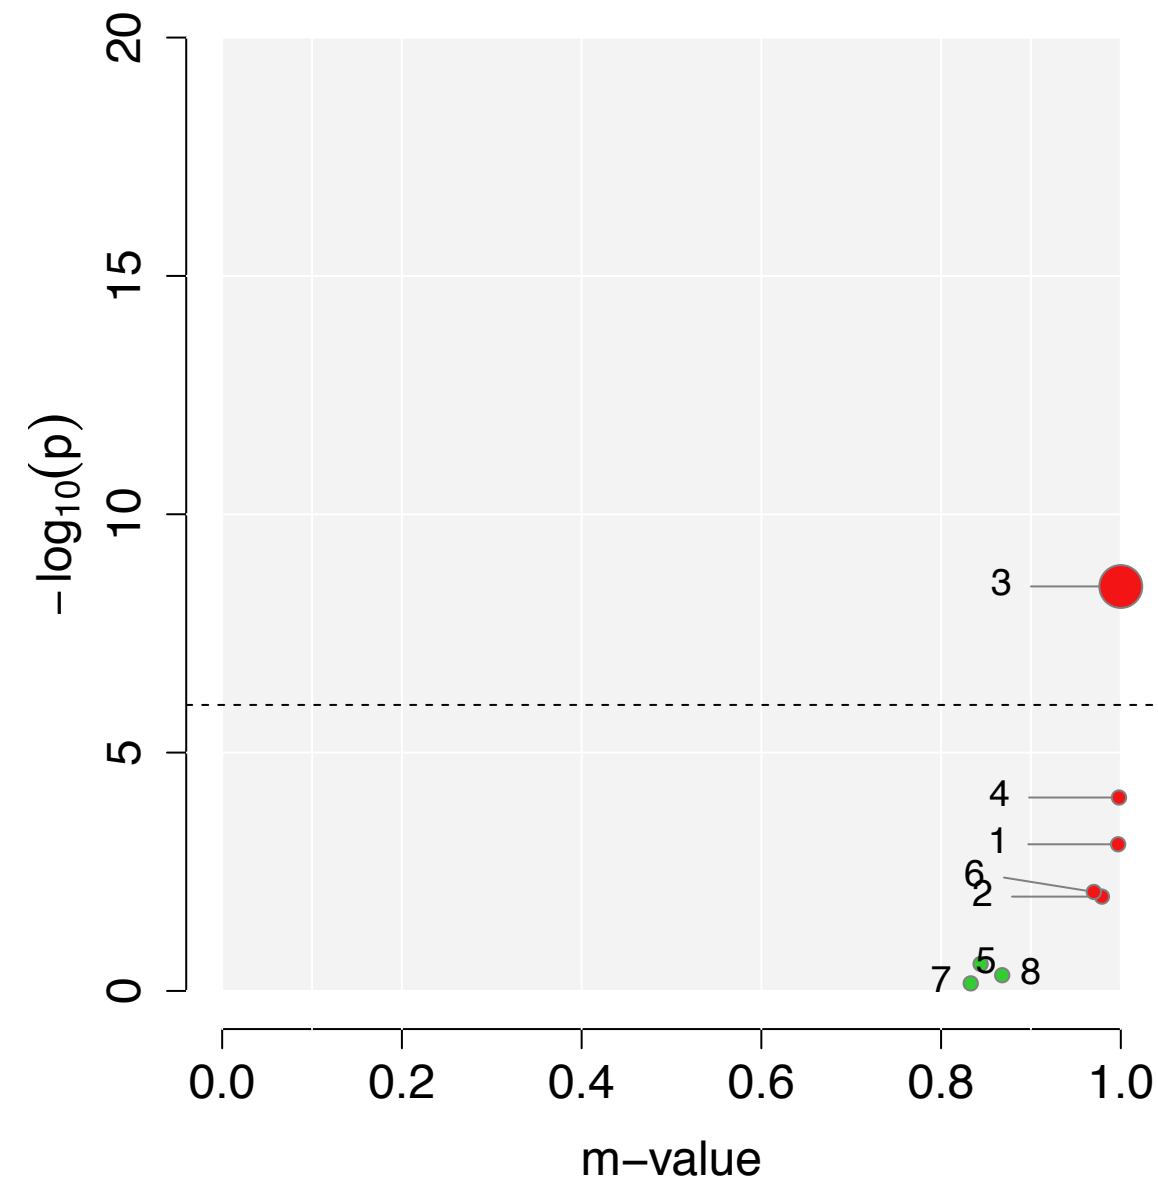

# rs10211550 (Meta $P = 1.37 \times 10^{-8}$ )

Gene : *HSPE1-MOB4, MOB4*

## GWAS P-value

- 4.84 x 10<sup>-9</sup> ● 1.SCZ
- 0.3238 ● 2.BIP
- 0.0030 ● 3.MD
- 0.5974 ● 4.ASD
- 0.1531 ● 5.ADHD
- 0.0624 ● 6.TS
- 0.0152 ● 7.ANO
- 0.0719 ● 8.OCD

FE summary

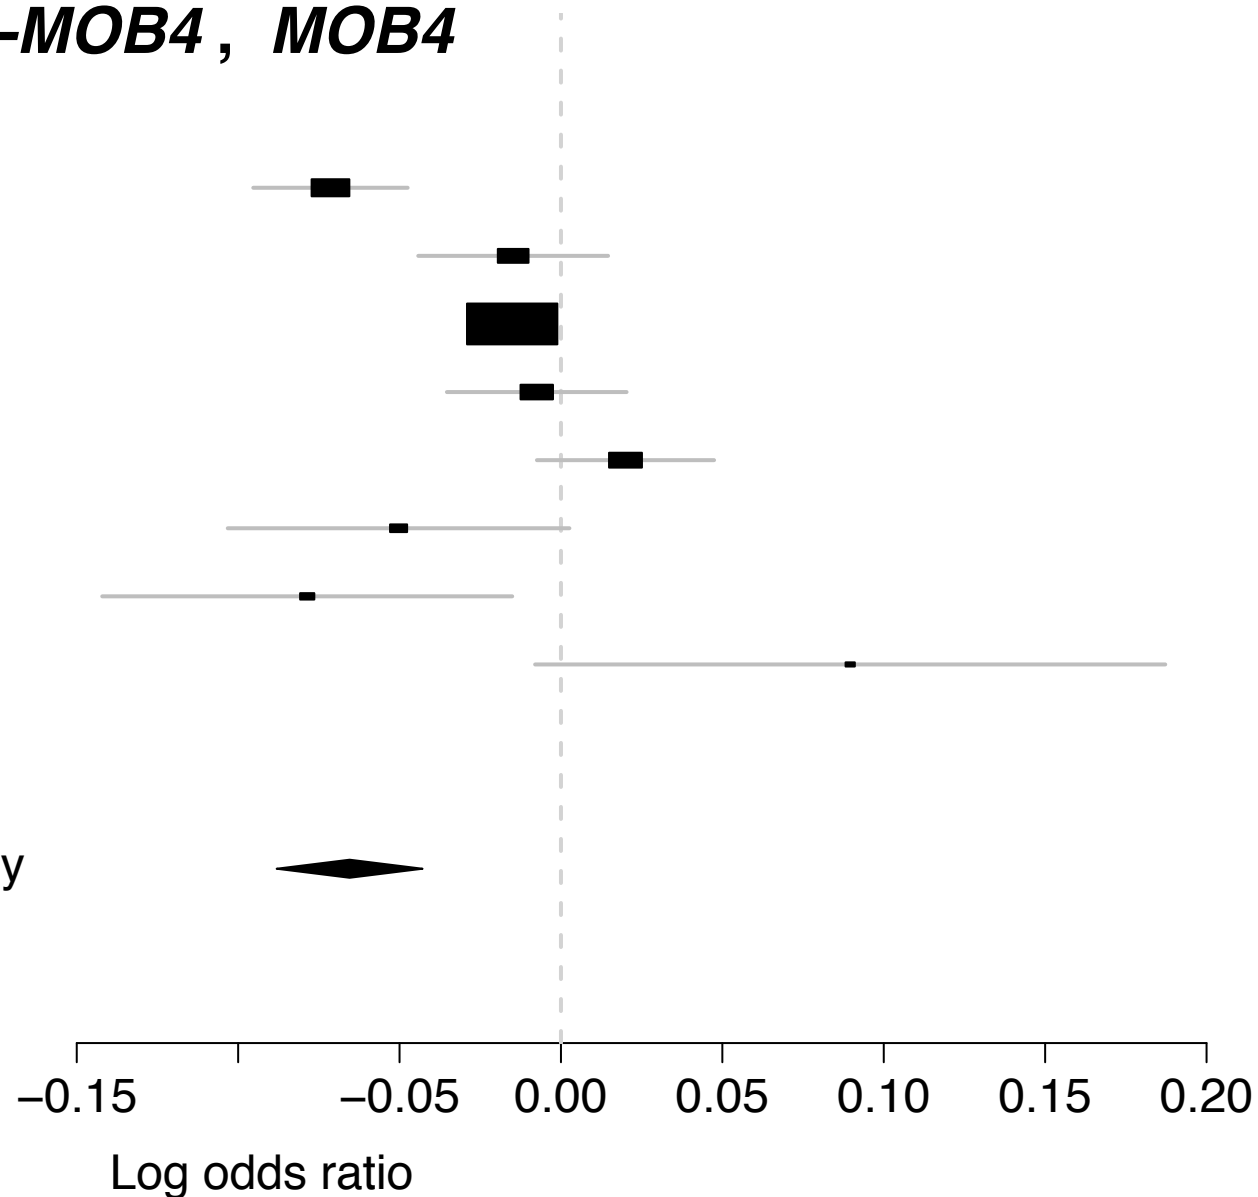

## PM-Plot

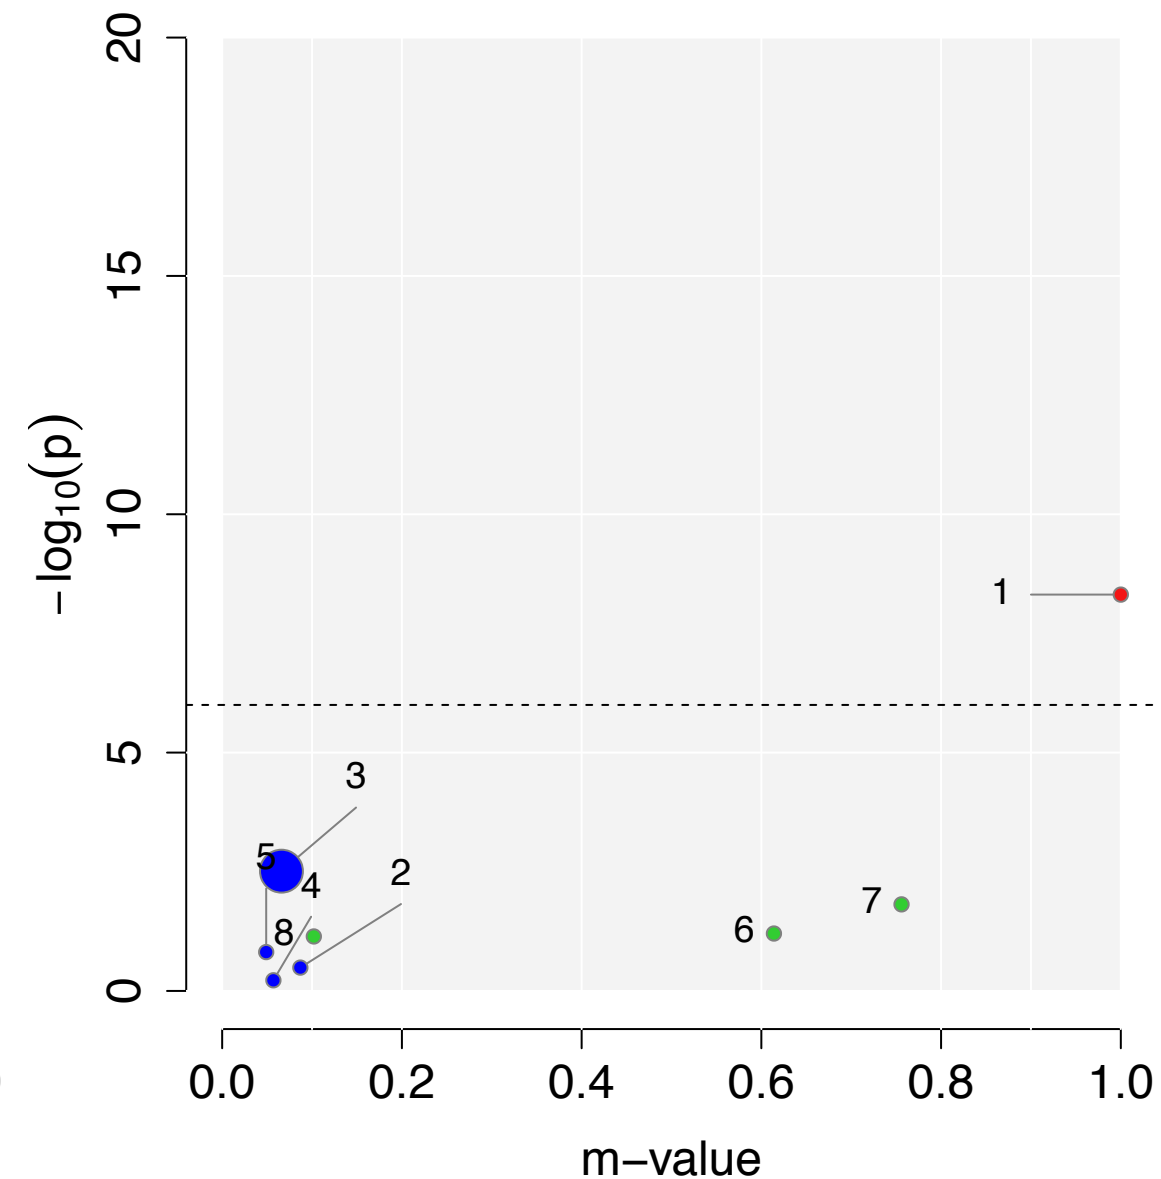

rs10265001 (Meta  $P = 4.93 \times 10^{-9}$ )

Gene : *MRPS33*, *BRAF*

GWAS P-value

- 0.0011 ● 1.SCZ
- $1.31 \times 10^{-7}$  ● 2.BIP
- 0.0008 ● 3.MD
- 0.0008 ● 4.ASD
- 0.5910 ● 5.ADHD
- 0.9701 ● 6.TS
- 0.6232 ● 7.ANO
- 0.0198 ● 8.OCD

FE summary

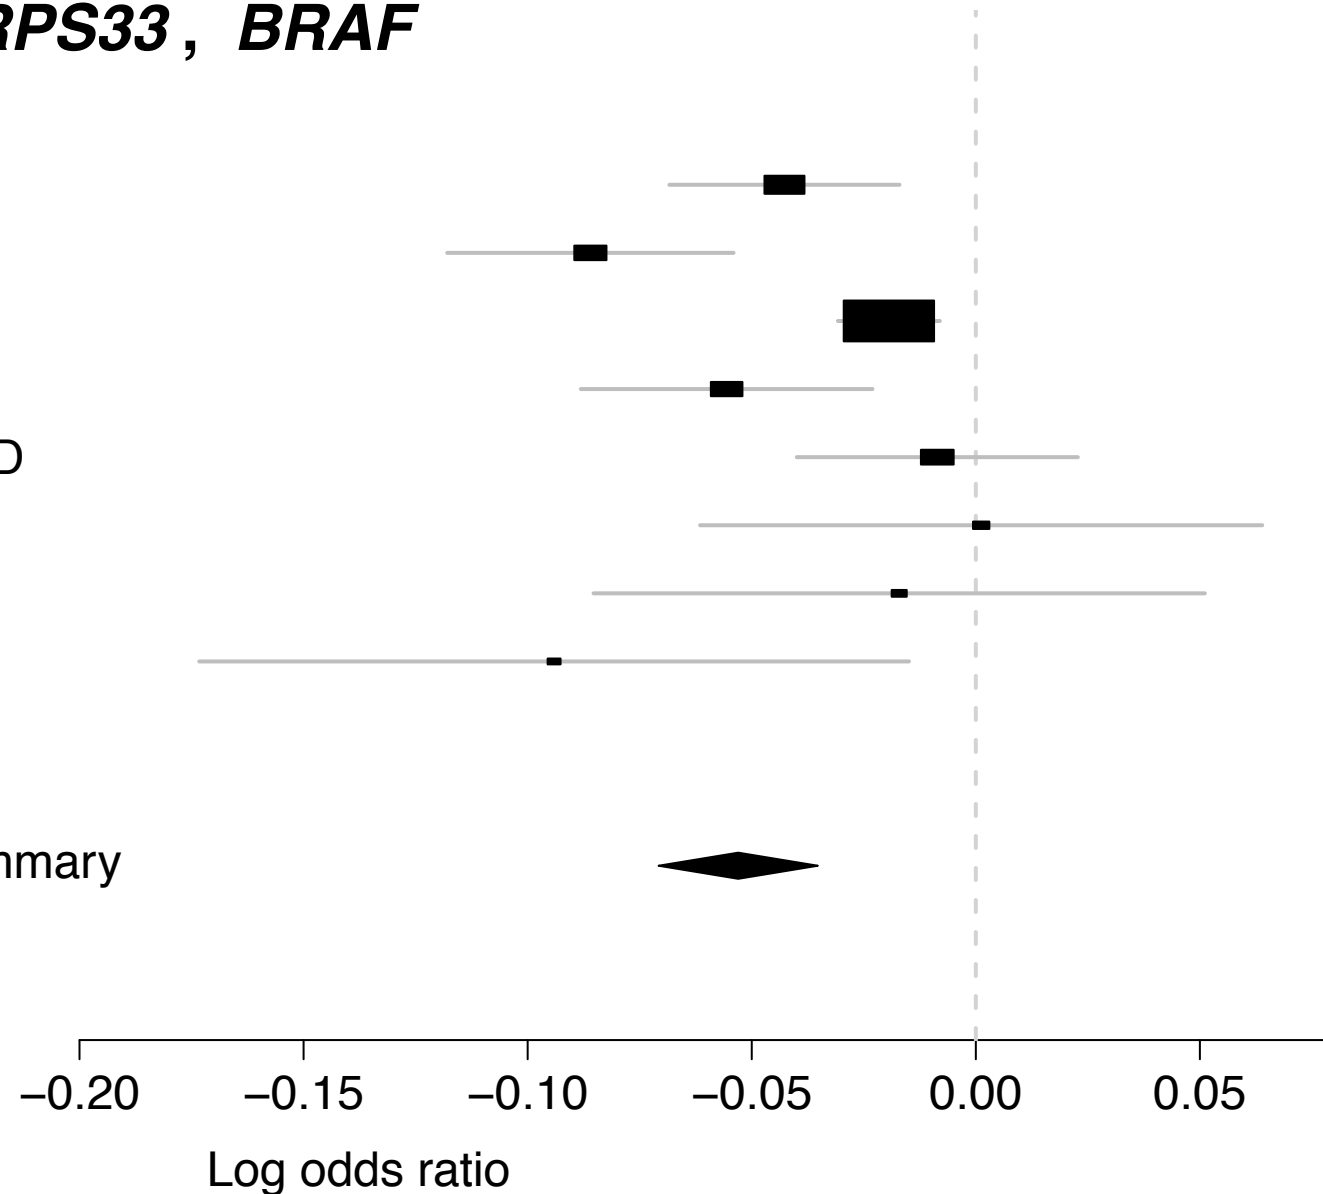

PM-Plot

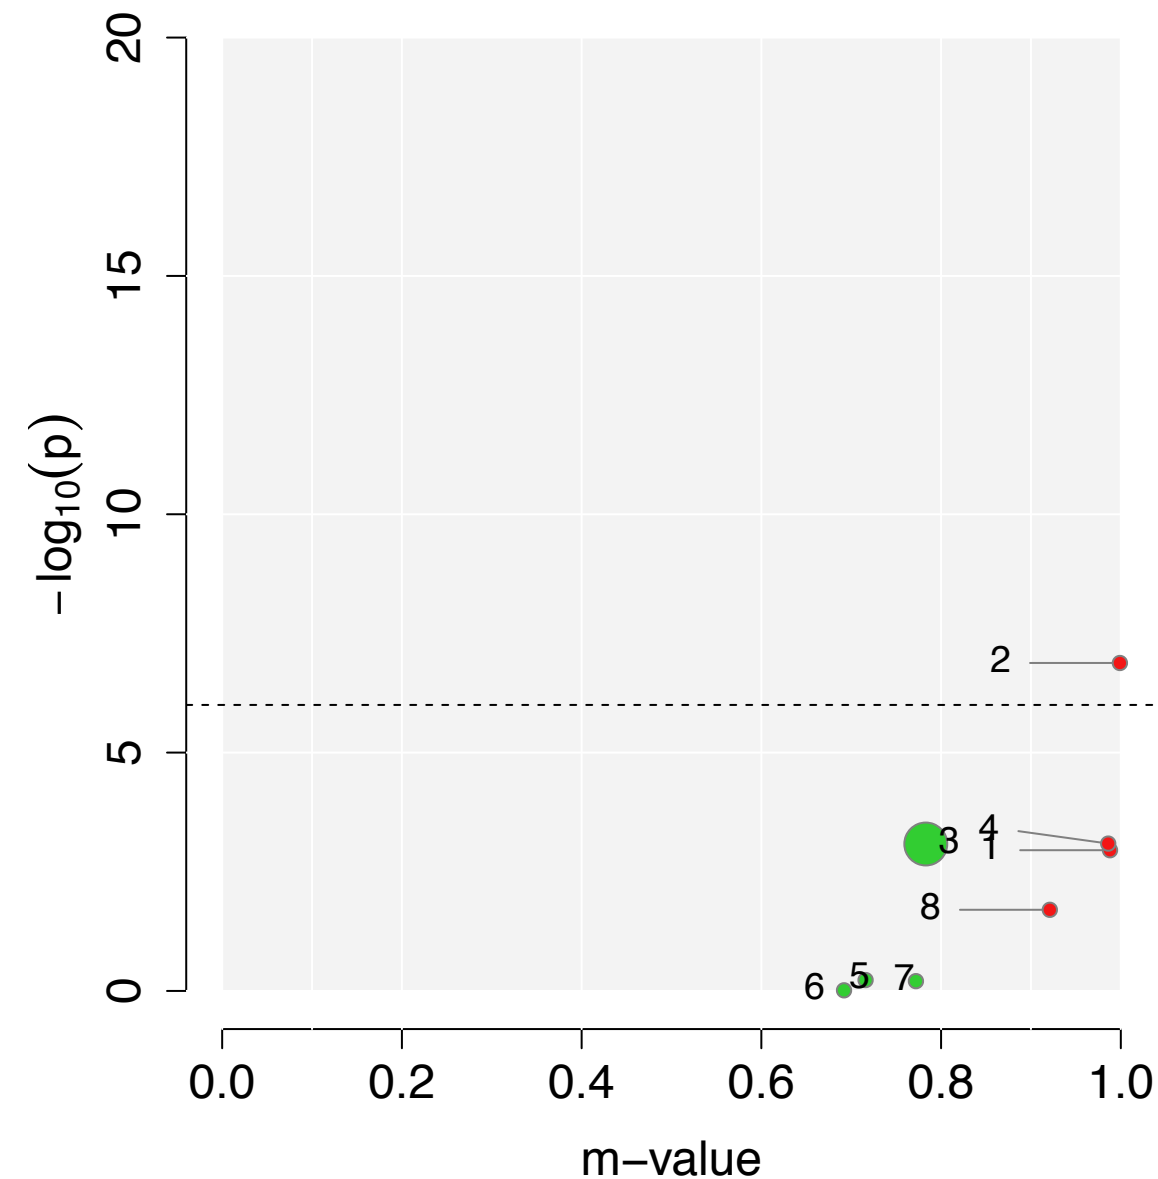

# rs10491964 (Meta $P = 2.4e \times 10^{-8}$ )

Gene : *CACNA1C*

## GWAS P-value

- 6.58 x 10<sup>-8</sup> ● 1.SCZ
- 0.0010 ● 2.BIP
- 3.08 x 10<sup>-5</sup> ● 3.MD
- 0.8527 ● 4.ASD
- 0.0789 ● 5.ADHD
- 0.7110 ● 6.TS
- 0.8903 ● 7.ANO
- 0.9769 ● 8.OCD

FE summary

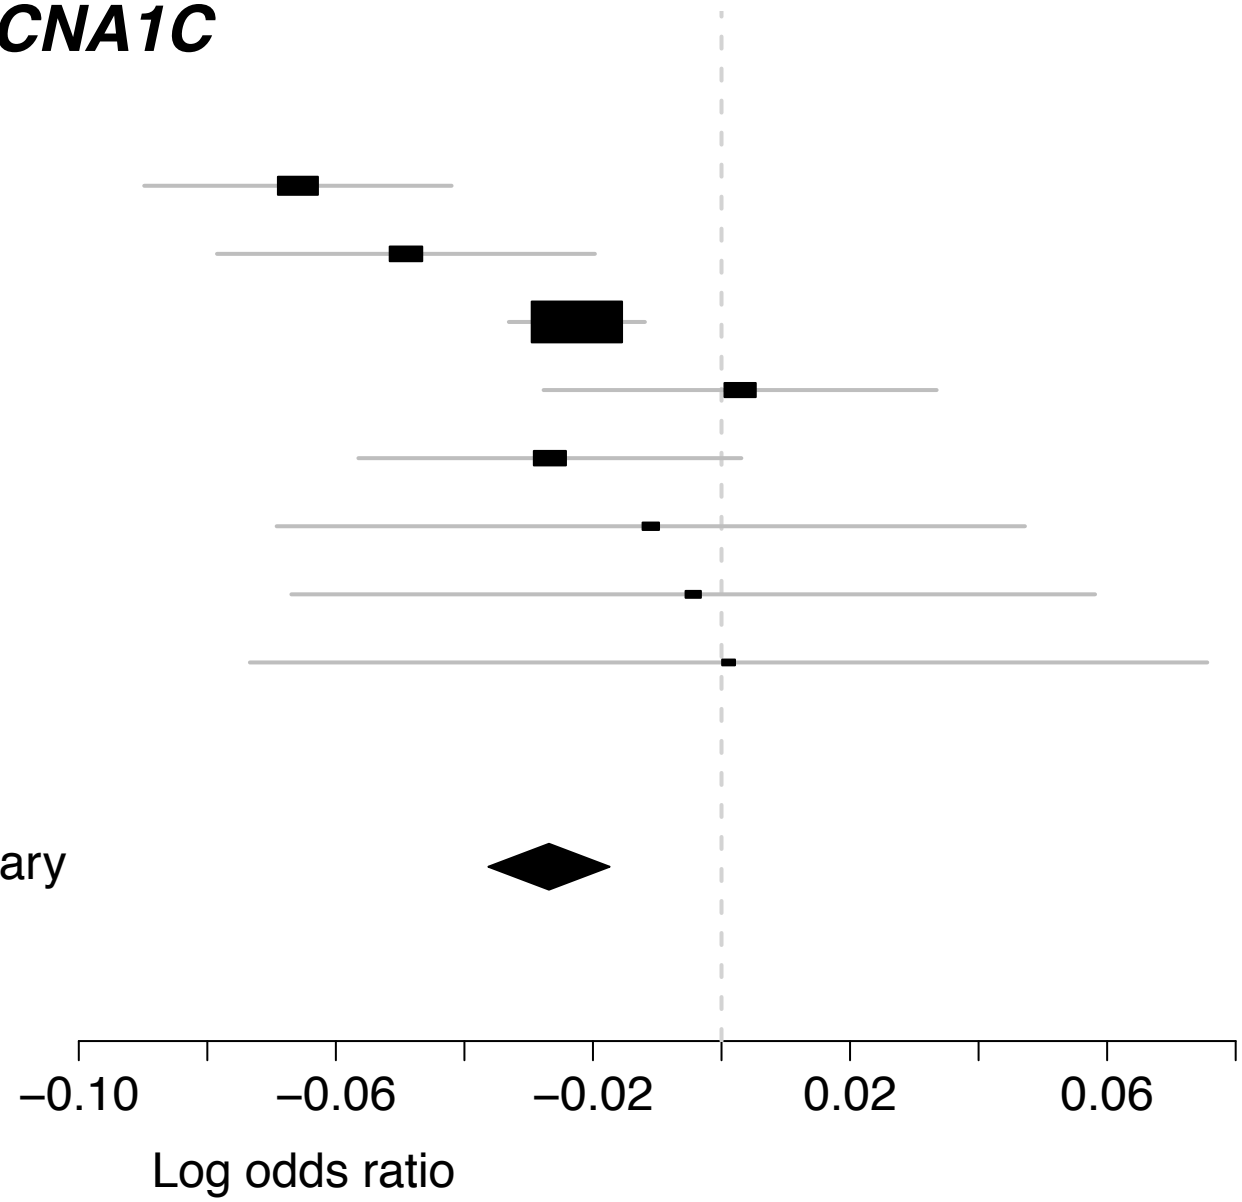

## PM-Plot

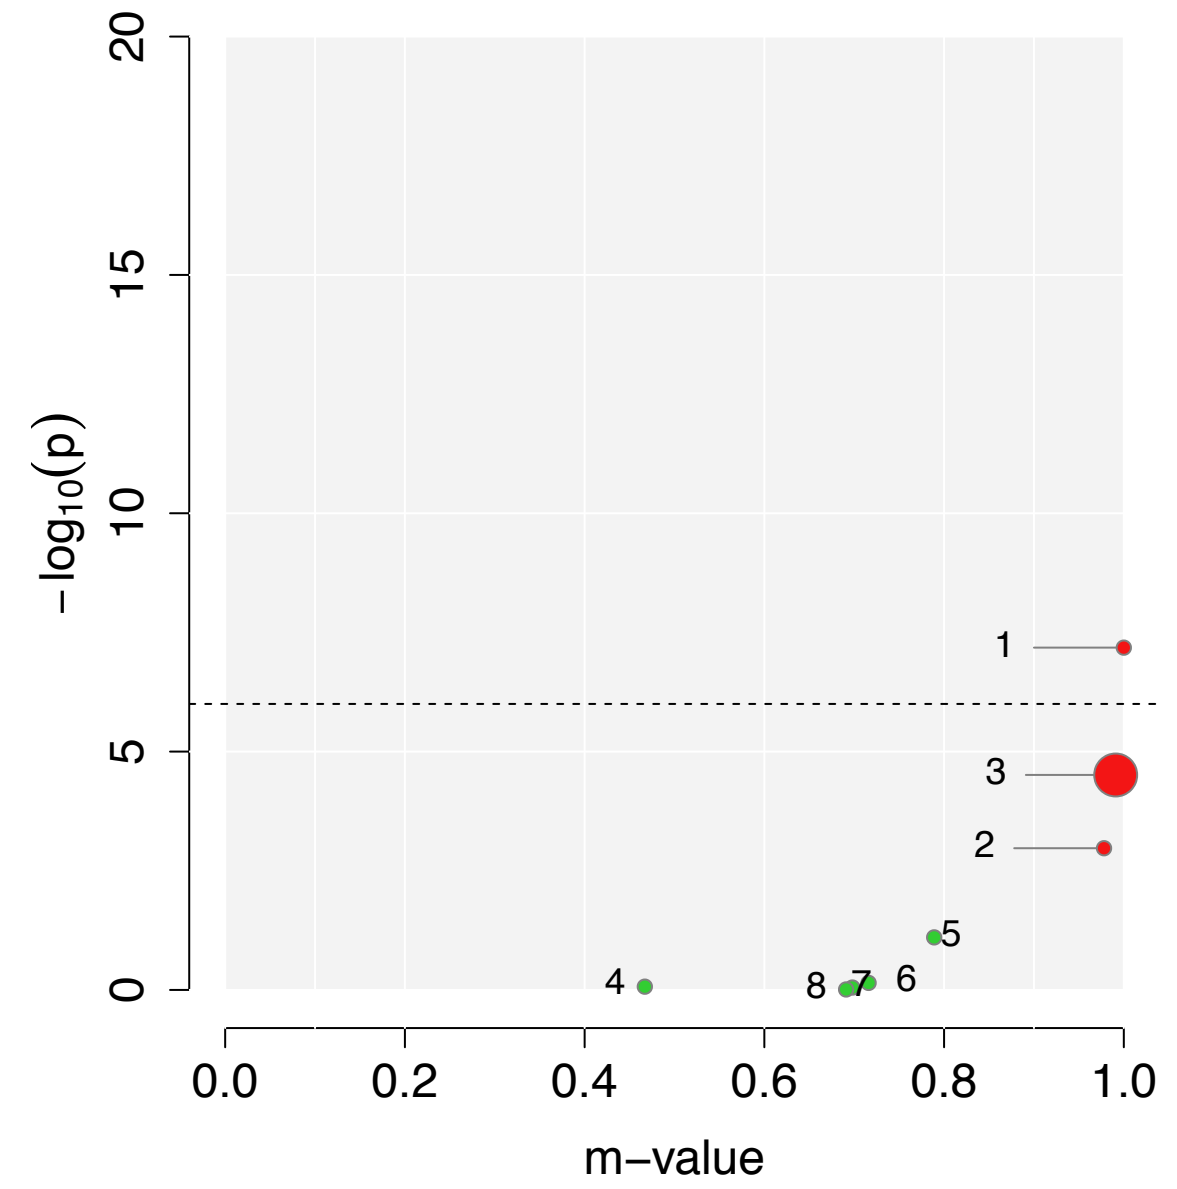

# rs10514301 (Meta $P = 1.87 \times 10^{-9}$ )

Gene : *MEF2C*

## GWAS P-value

- 0.5840 ● 1.SCZ
- 0.0229 ● 2.BIP
- $3.22 \times 10^{-10}$  ● 3.MD
- 0.1062 ● 4.ASD
- 0.6830 ● 5.ADHD
- 0.0239 ● 6.TS
- 0.0188 ● 7.ANO
- 0.8244 ● 8.OCD

FE summary

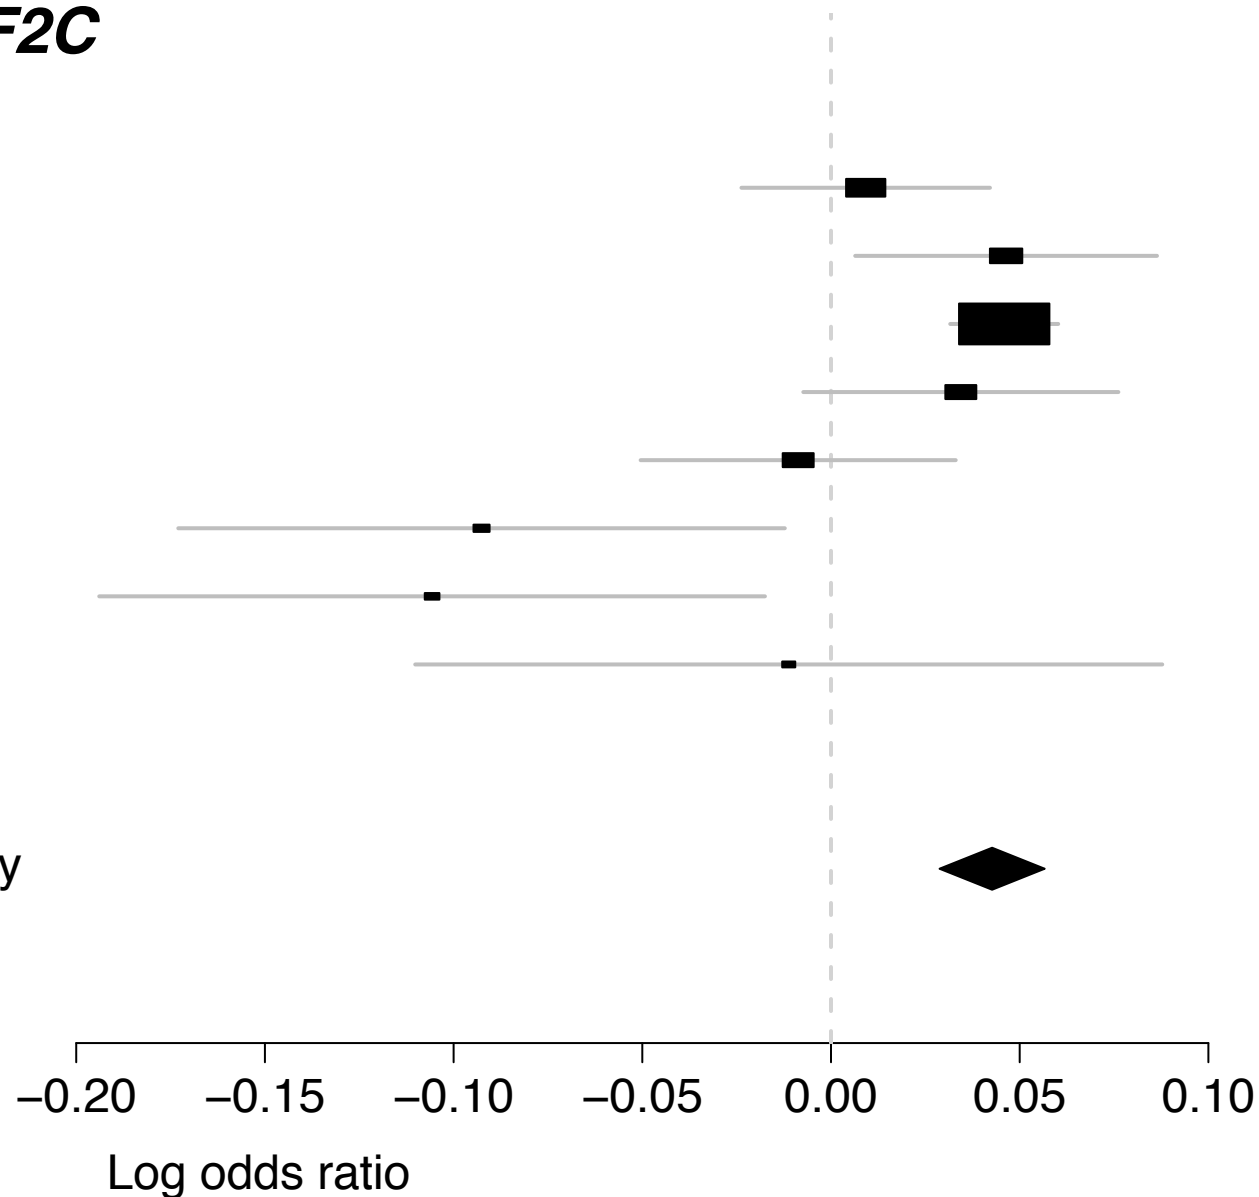

## PM-Plot

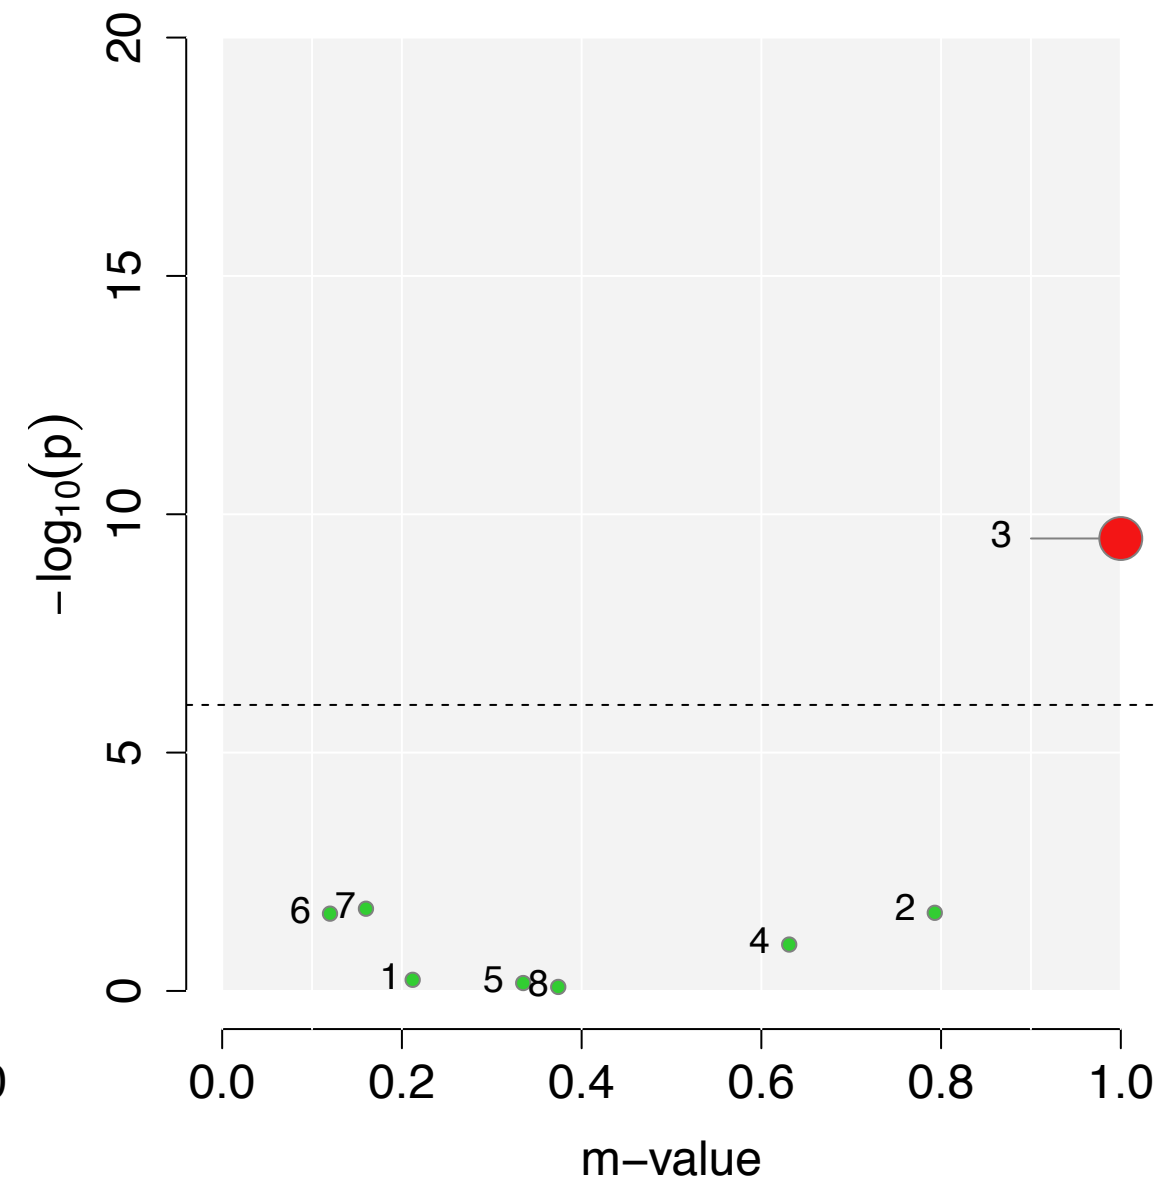



# rs10745841 (Meta $P = 1.05 \times 10^{-8}$ )

Gene : *ANKS1B*

## GWAS P-value

- 6.00 x 10<sup>-7</sup> ● 1.SCZ
- 4.57 x 10<sup>-7</sup> ● 2.BIP
- 0.2130 ● 3.MD
- 0.0807 ● 4.ASD
- 0.2648 ● 5.ADHD
- 0.3373 ● 6.TS
- 0.5549 ● 7.ANO
- 0.9089 ● 8.OCD

FE summary

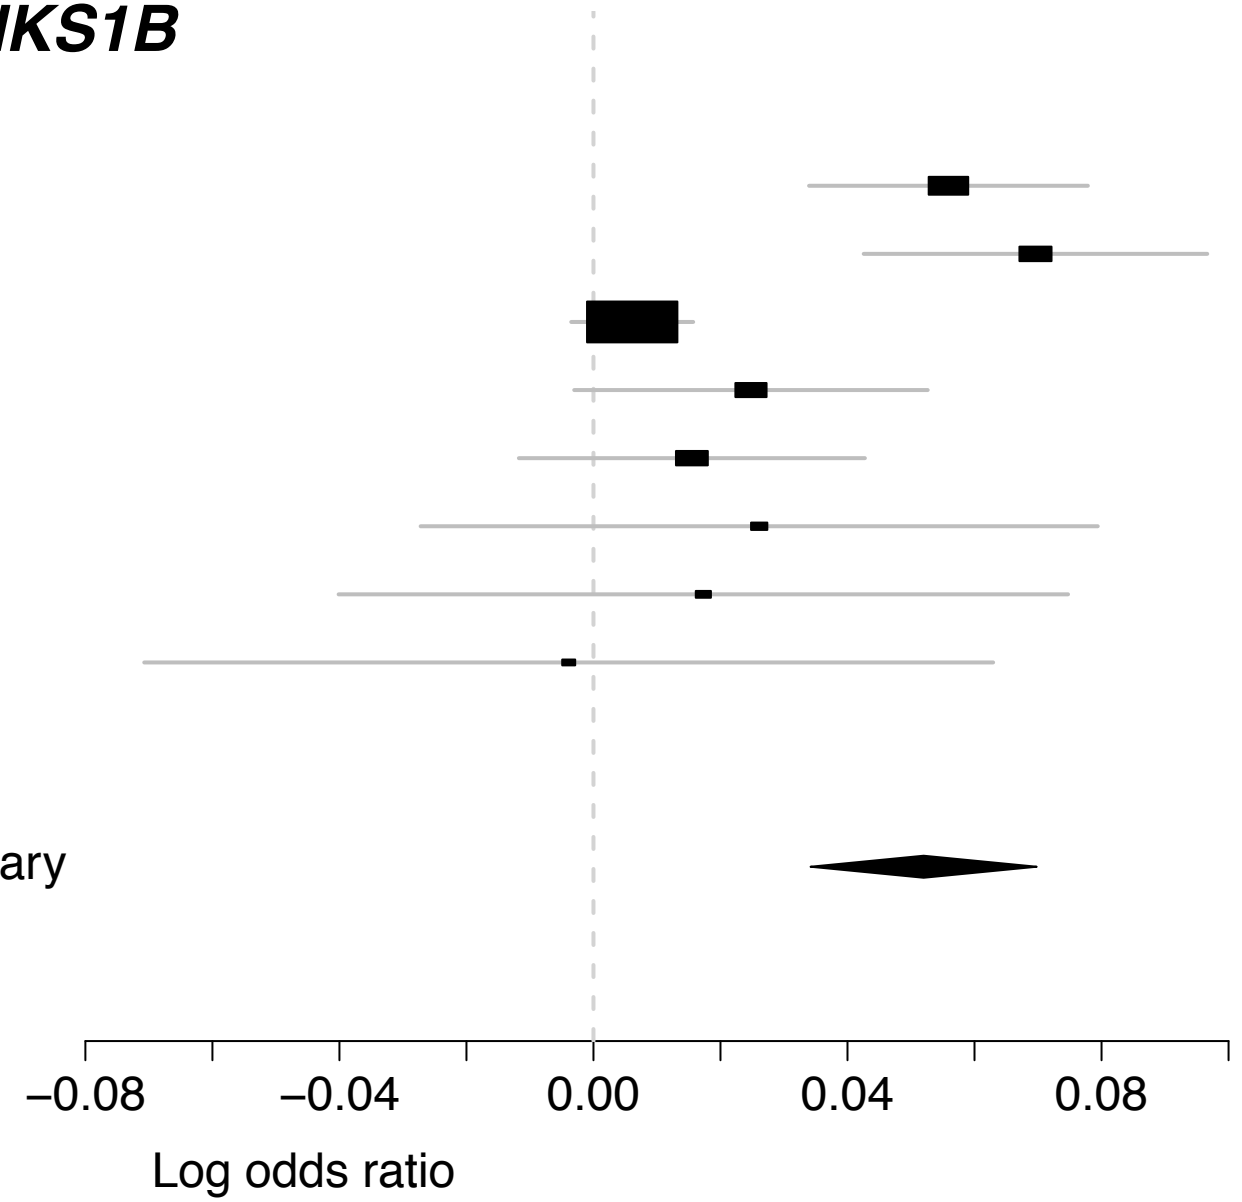

## PM-Plot

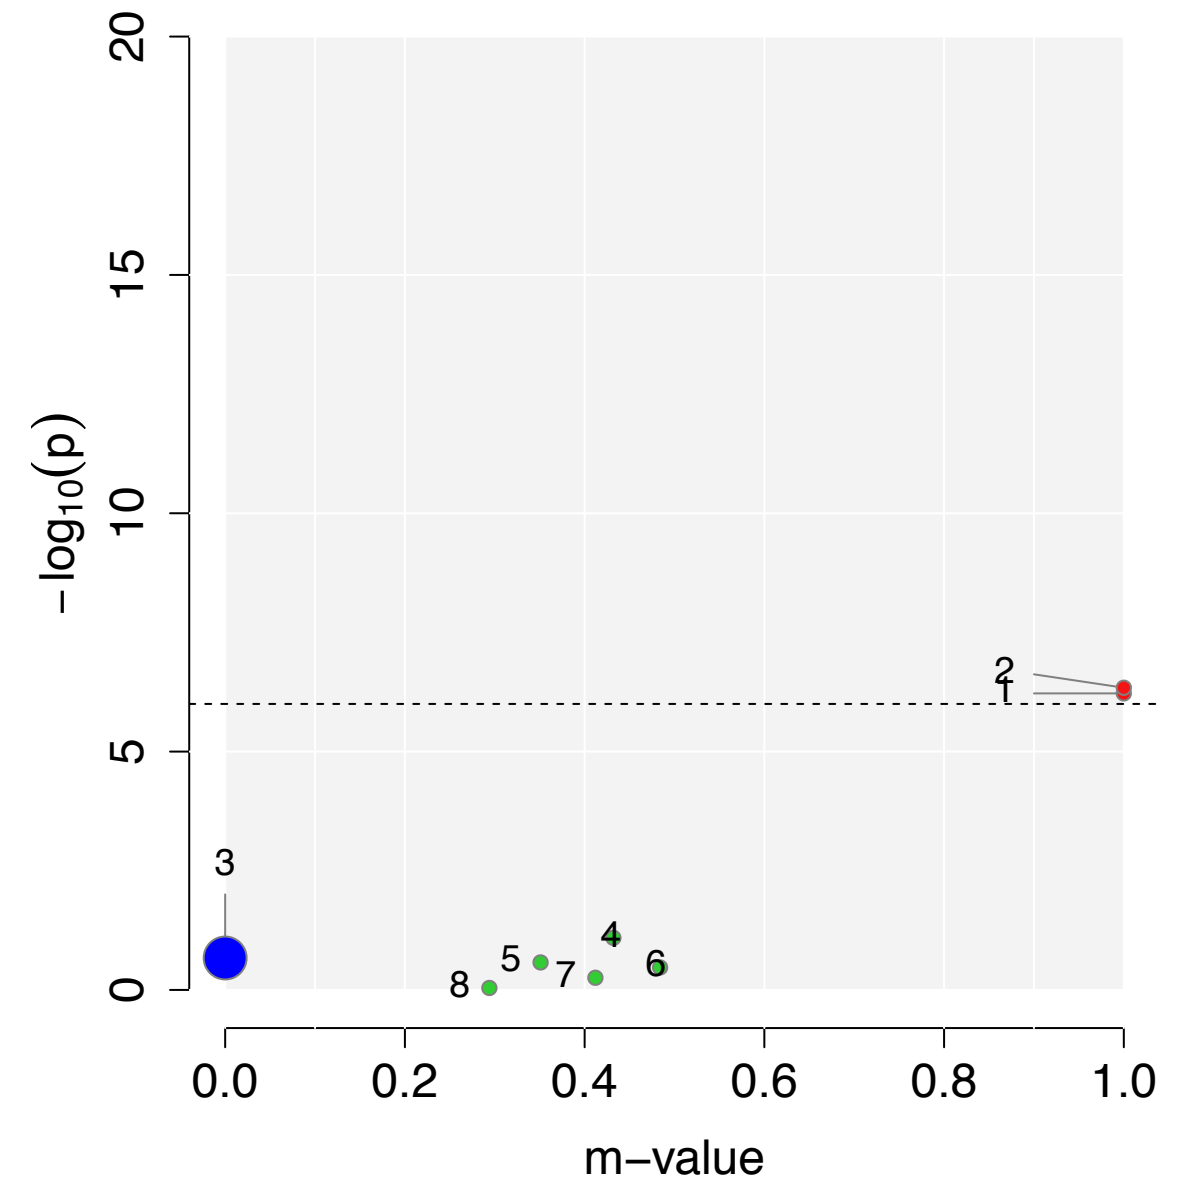

# rs10791097 (Meta $P = 2.38 \times 10^{-10}$ )

Gene : **SNX19**

## GWAS P-value

- 2.10 x 10<sup>-12</sup> ● 1.SCZ
- 0.0305 ● 2.BIP
- 0.0286 ● 3.MD
- 0.9772 ● 4.ASD
- 0.1546 ● 5.ADHD
- 0.2140 ● 6.TS
- 0.4574 ● 7.ANO
- 0.9952 ● 8.OCD

FE summary

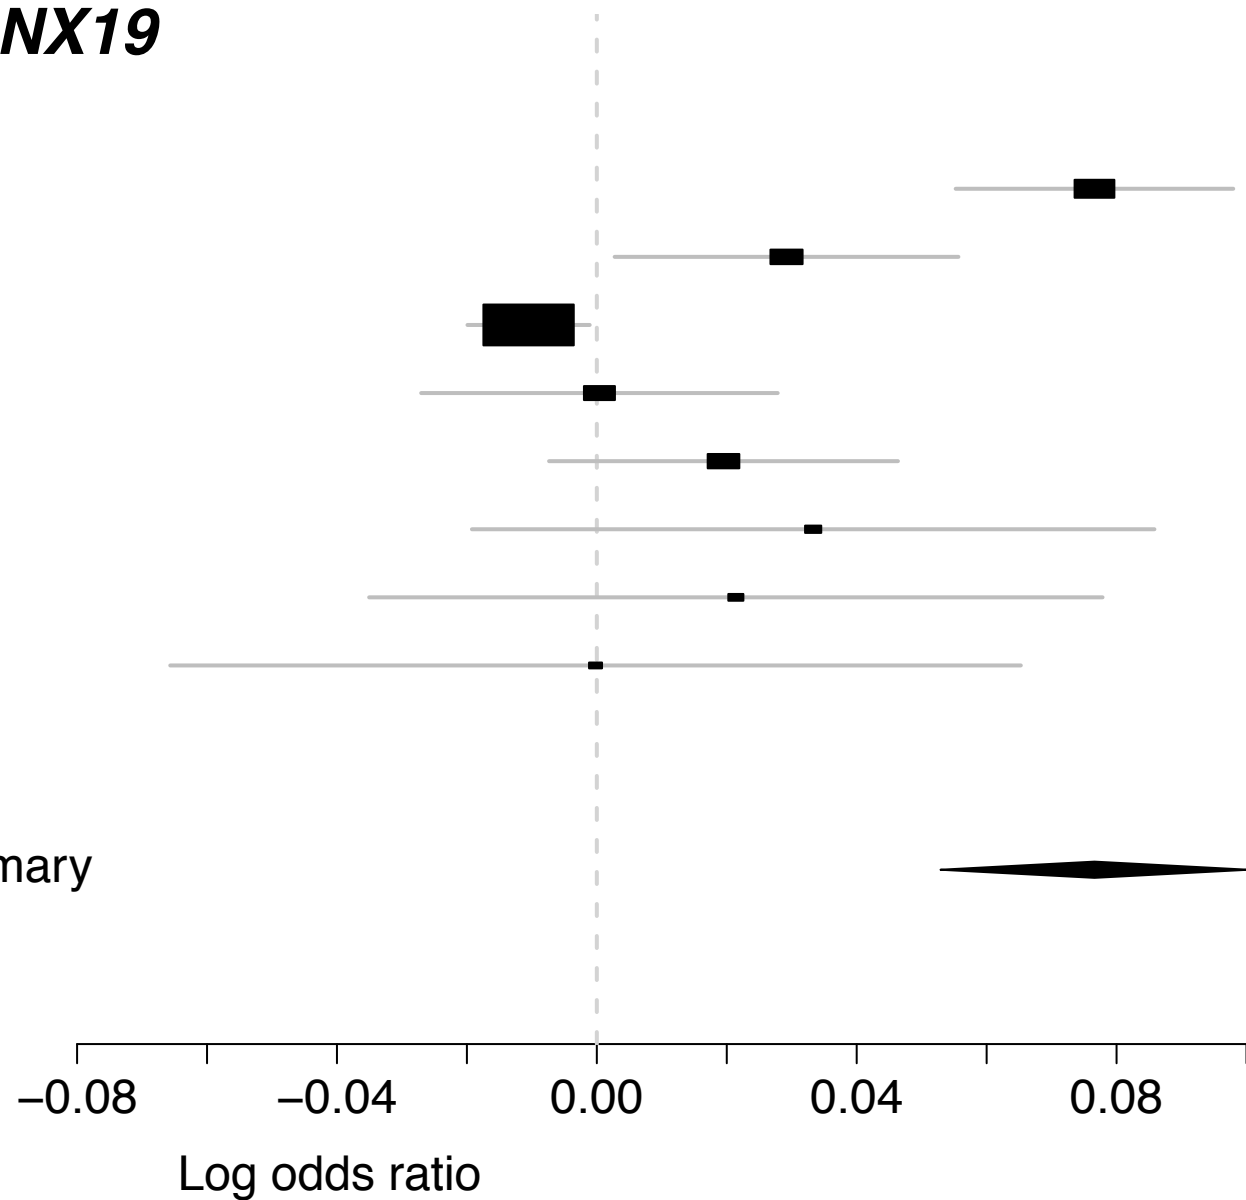

## PM-Plot

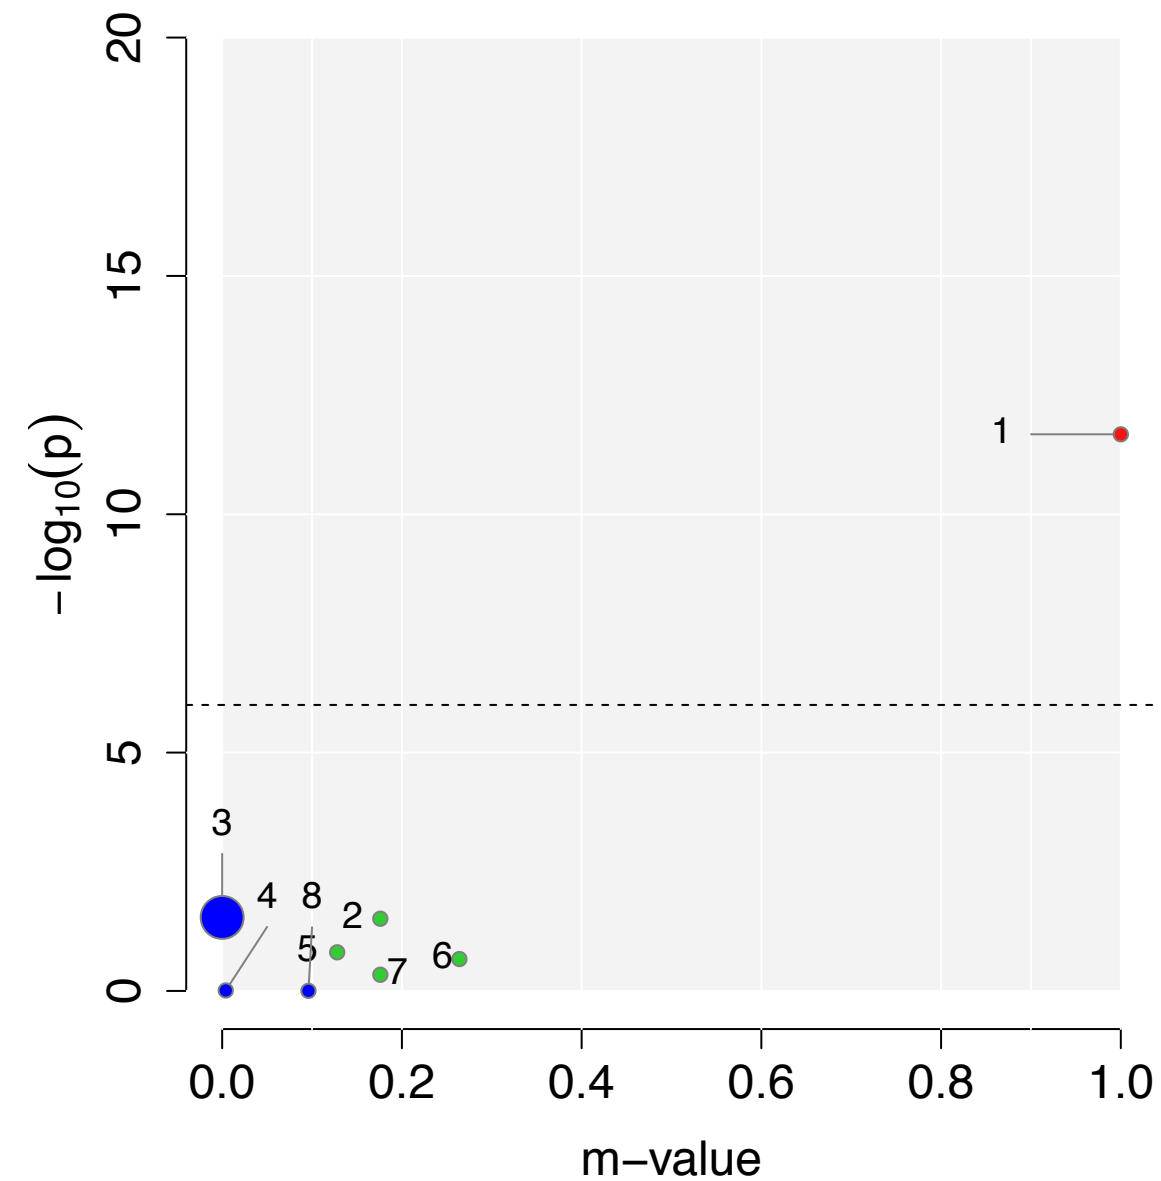

rs10883832 (Meta  $P = 2.54 \times 10^{-14}$ )

Gene : *NT5C2*, *CNNM2*

GWAS P-value

- 1.85 x 10<sup>-16</sup> ● 1.SCZ
- 0.0006 ● 2.BIP
- 3.65 x 10<sup>-5</sup> ● 3.MD
- 0.9736 ● 4.ASD
- 0.0446 ● 5.ADHD
- 0.1113 ● 6.TS
- 0.6019 ● 7.ANO
- 0.3036 ● 8.OCD

FE summary

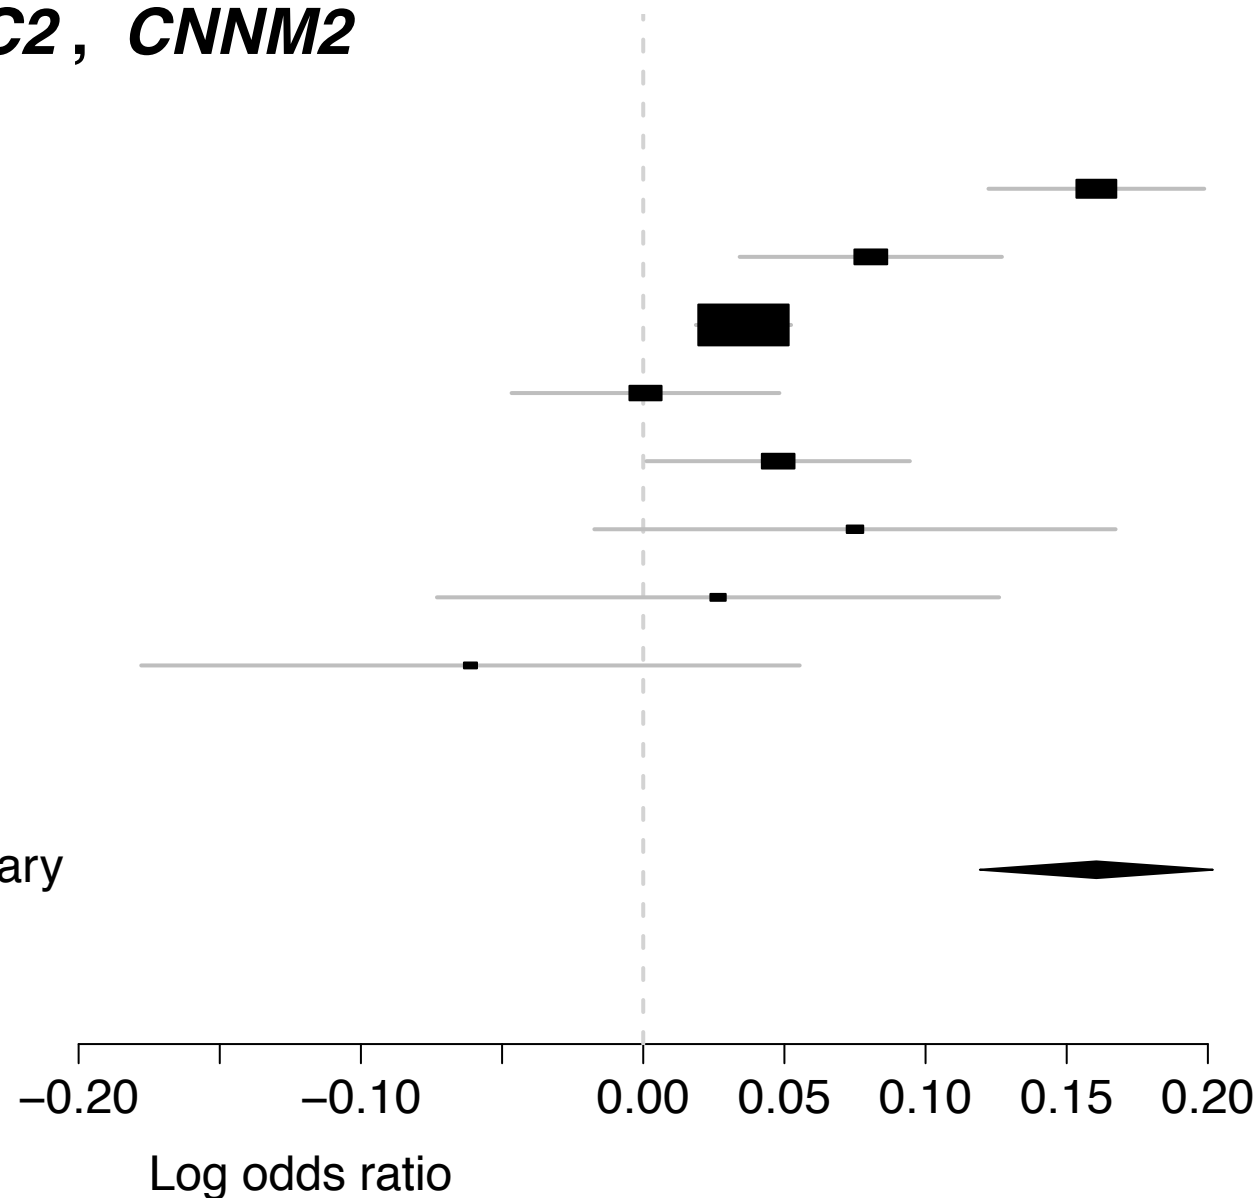

PM-Plot

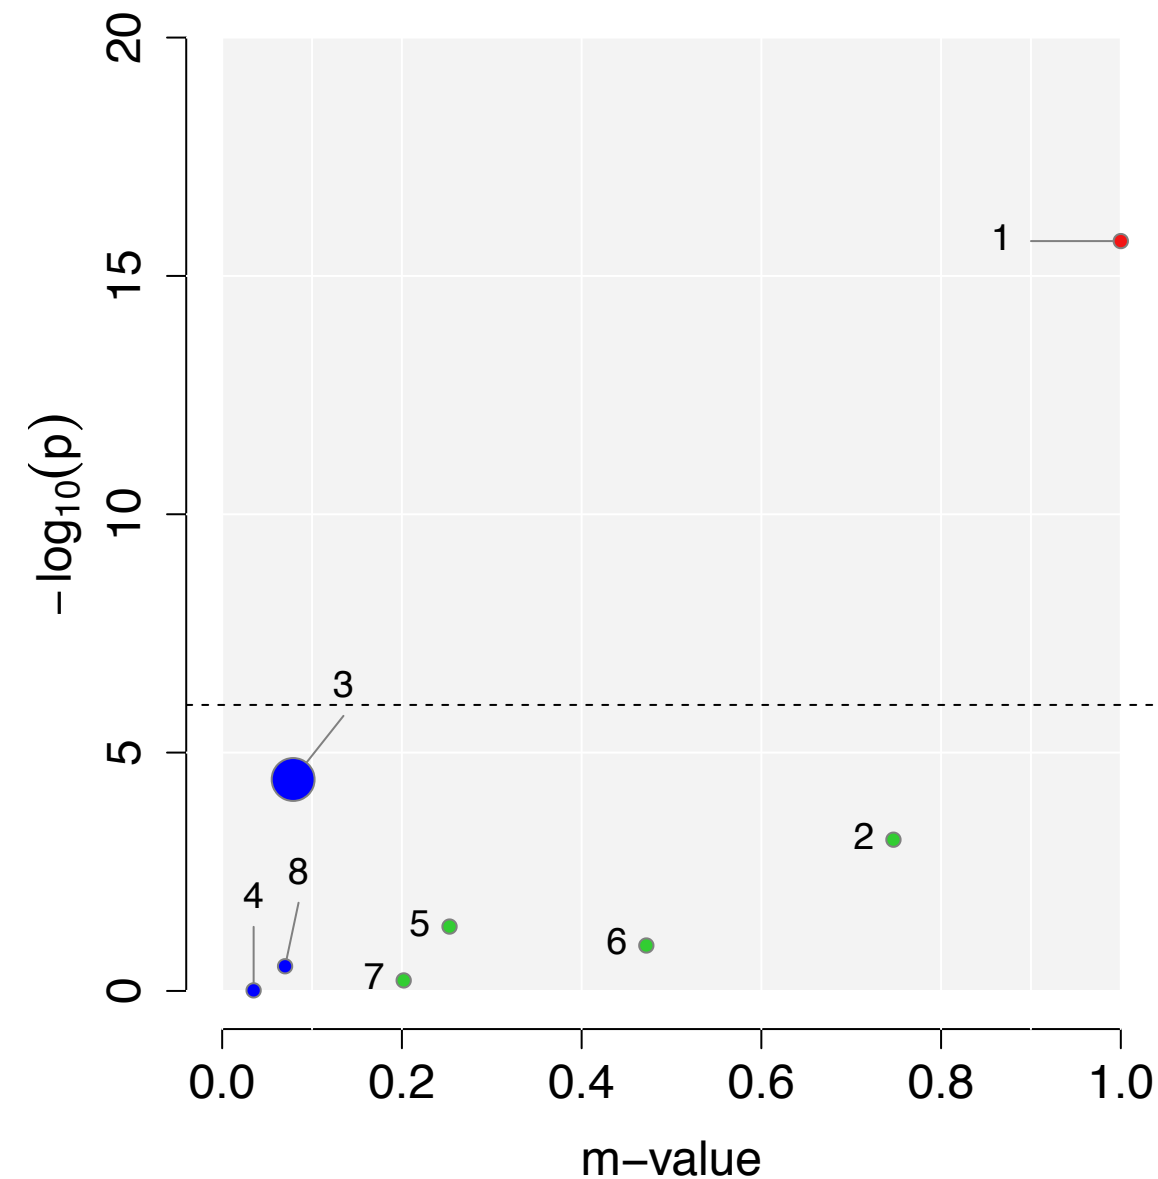

rs11231640 (Meta  $P = 8.32 \times 10^{-9}$ )

Gene : *RCOR2*, *MARK2*

GWAS P-value

- 2.63 x 10<sup>-6</sup> ● 1.SCZ
- 2.14 x 10<sup>-6</sup> ● 2.BIP
- 4.43 x 10<sup>-5</sup> ● 3.MD
- 0.6118 ● 4.ASD
- 0.1051 ● 5.ADHD
- 0.0676 ● 6.TS
- 0.0372 ● 7.ANO
- 0.5800 ● 8.OCD

FE summary

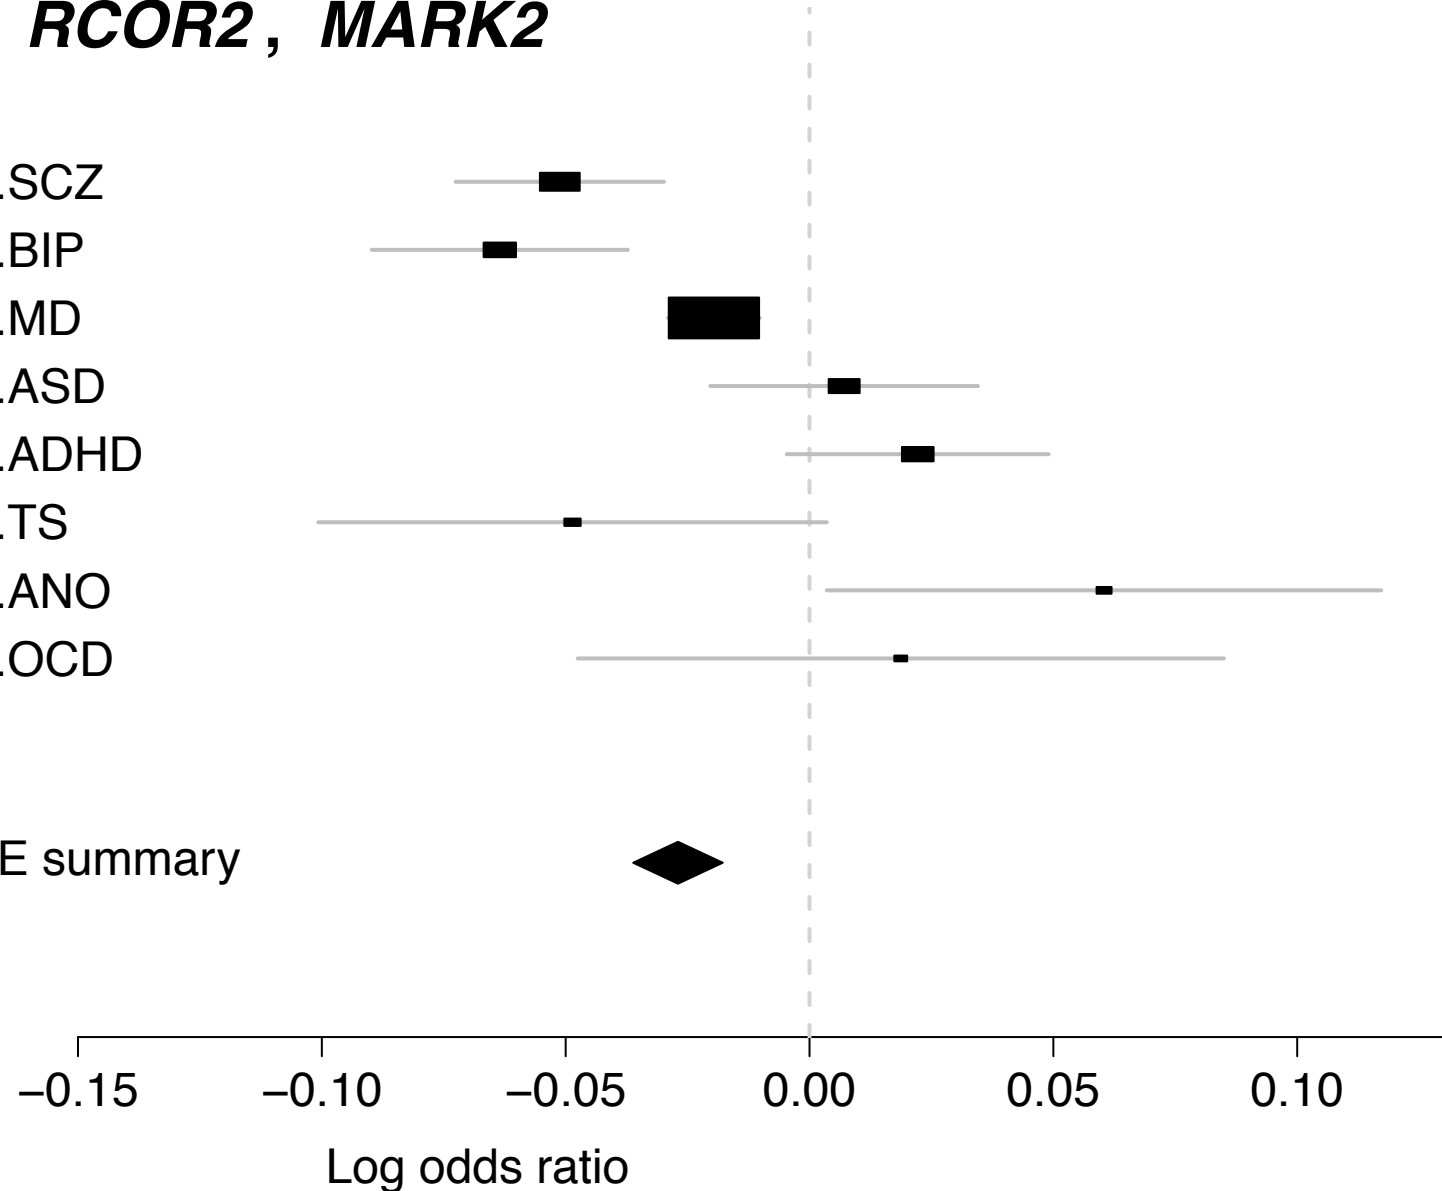

PM-Plot

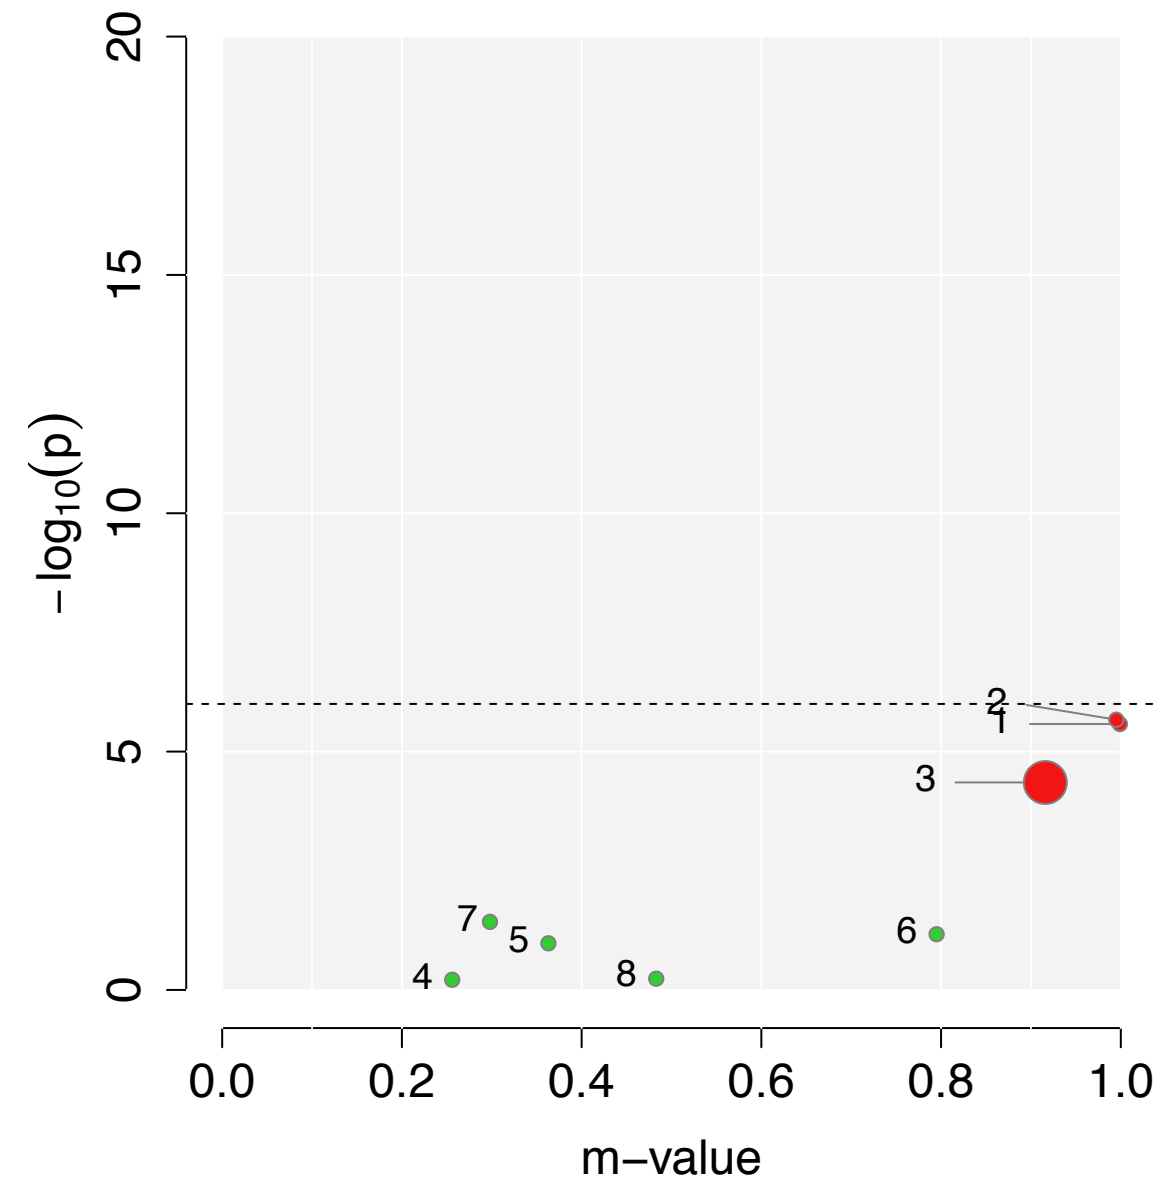

# rs11570190 (Meta $P = 1.23 \times 10^{-10}$ )

Gene : *CTNND1*, *BTBD18*

## GWAS P-value

- 9.39 x 10<sup>-7</sup> ● 1.SCZ
- 0.8545 ● 2.BIP
- 8.56 x 10<sup>-7</sup> ● 3.MD
- 0.0087 ● 4.ASD
- 0.0005 ● 5.ADHD
- 0.4116 ● 6.TS
- 0.7037 ● 7.ANO
- 0.0319 ● 8.OCD

FE summary

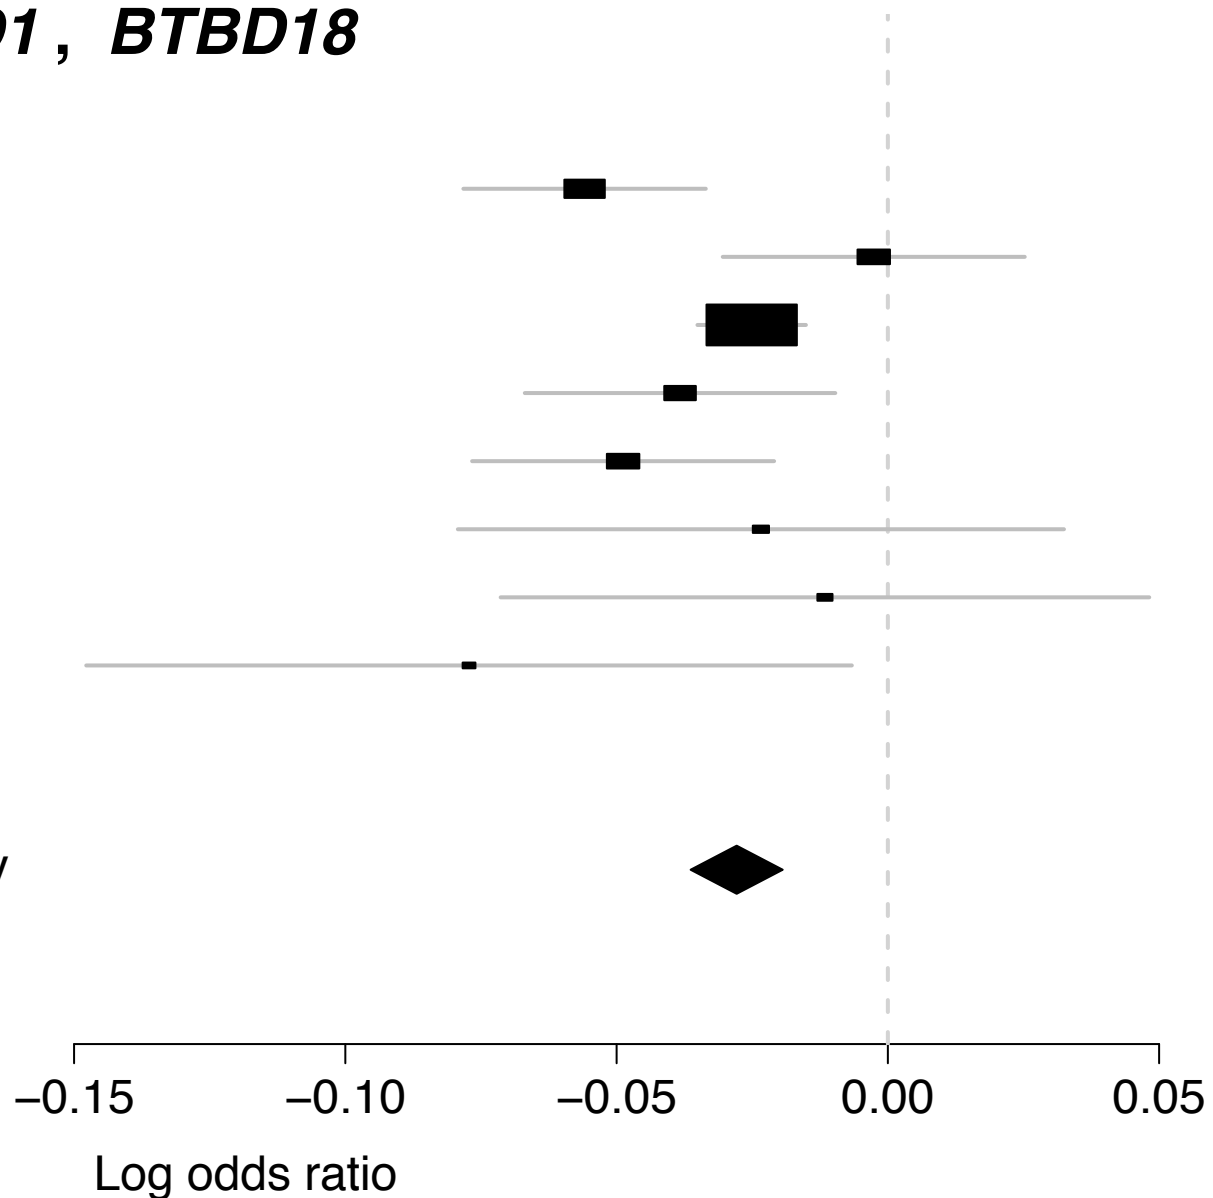

## PM-Plot

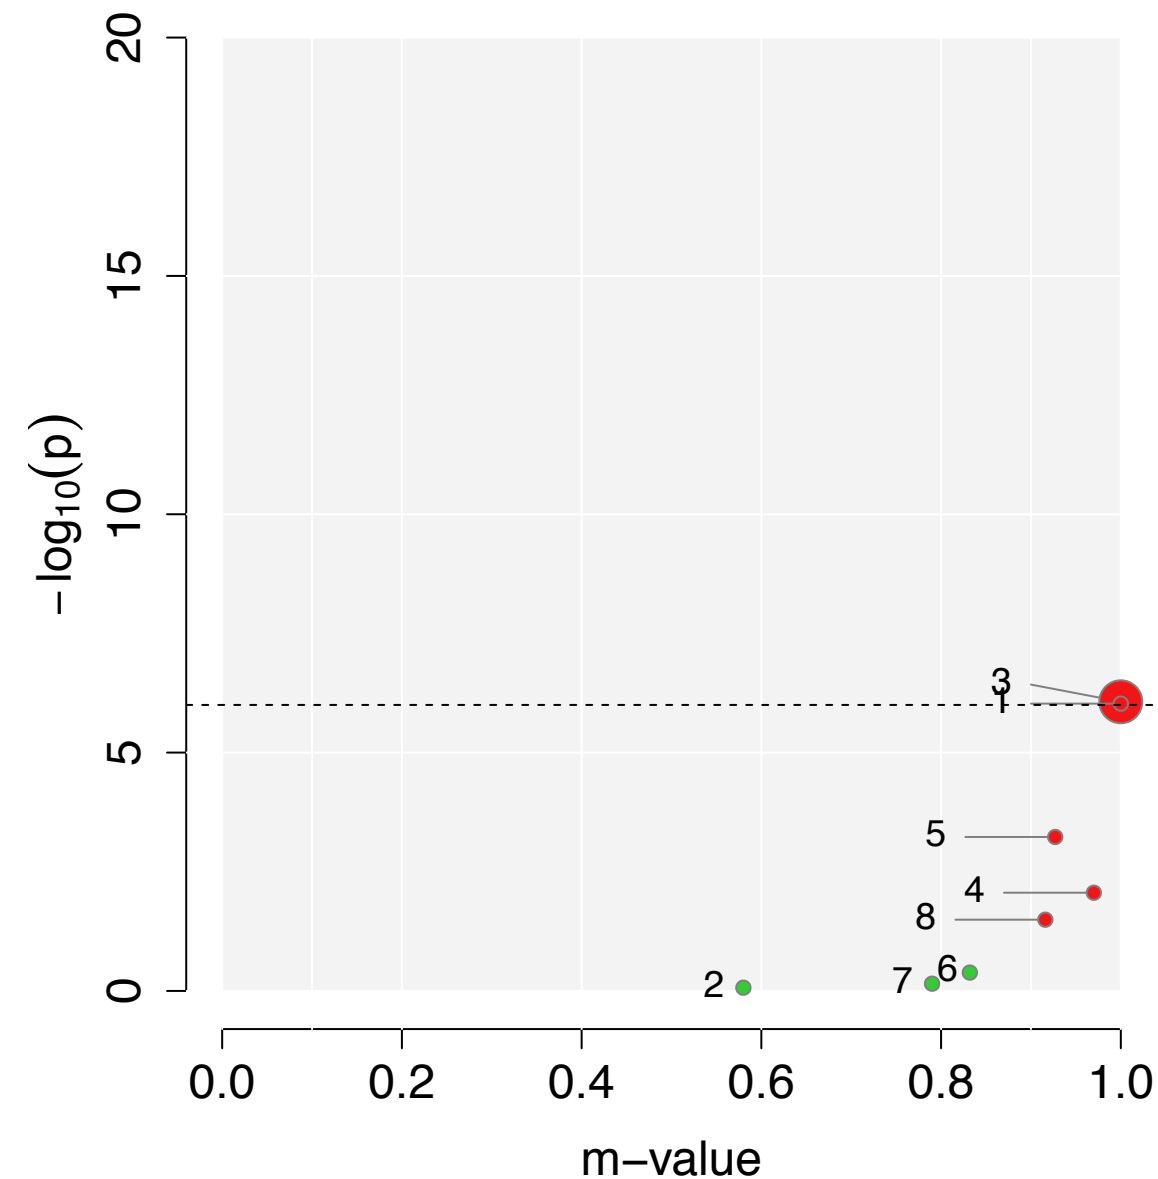

# rs11658257 (Meta $P = 1.81 \times 10^{-8}$ )

Gene : *GID4*, *ATPAF2*

## GWAS P-value

- 8.56 x 10<sup>-9</sup> ● 1.SCZ
- 0.6831 ● 2.BIP
- 0.1951 ● 3.MD
- 0.0118 ● 4.ASD
- 0.1583 ● 5.ADHD
- 0.9206 ● 6.TS
- 0.6521 ● 7.ANO
- 0.0020 ● 8.OCD

FE summary

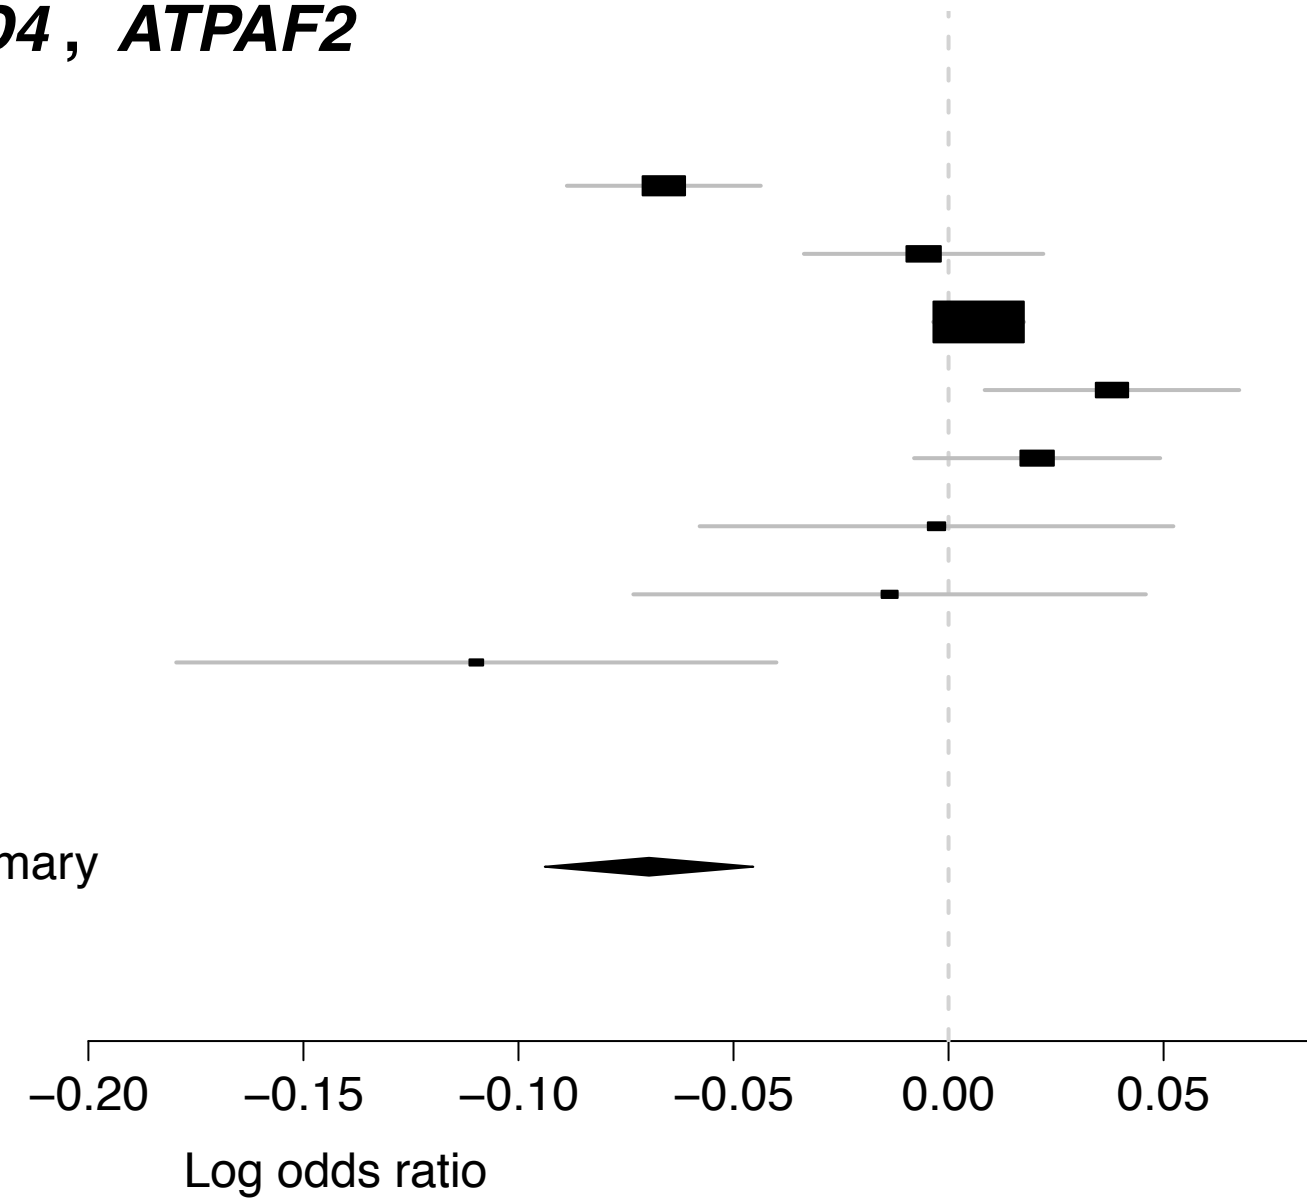

## PM-Plot

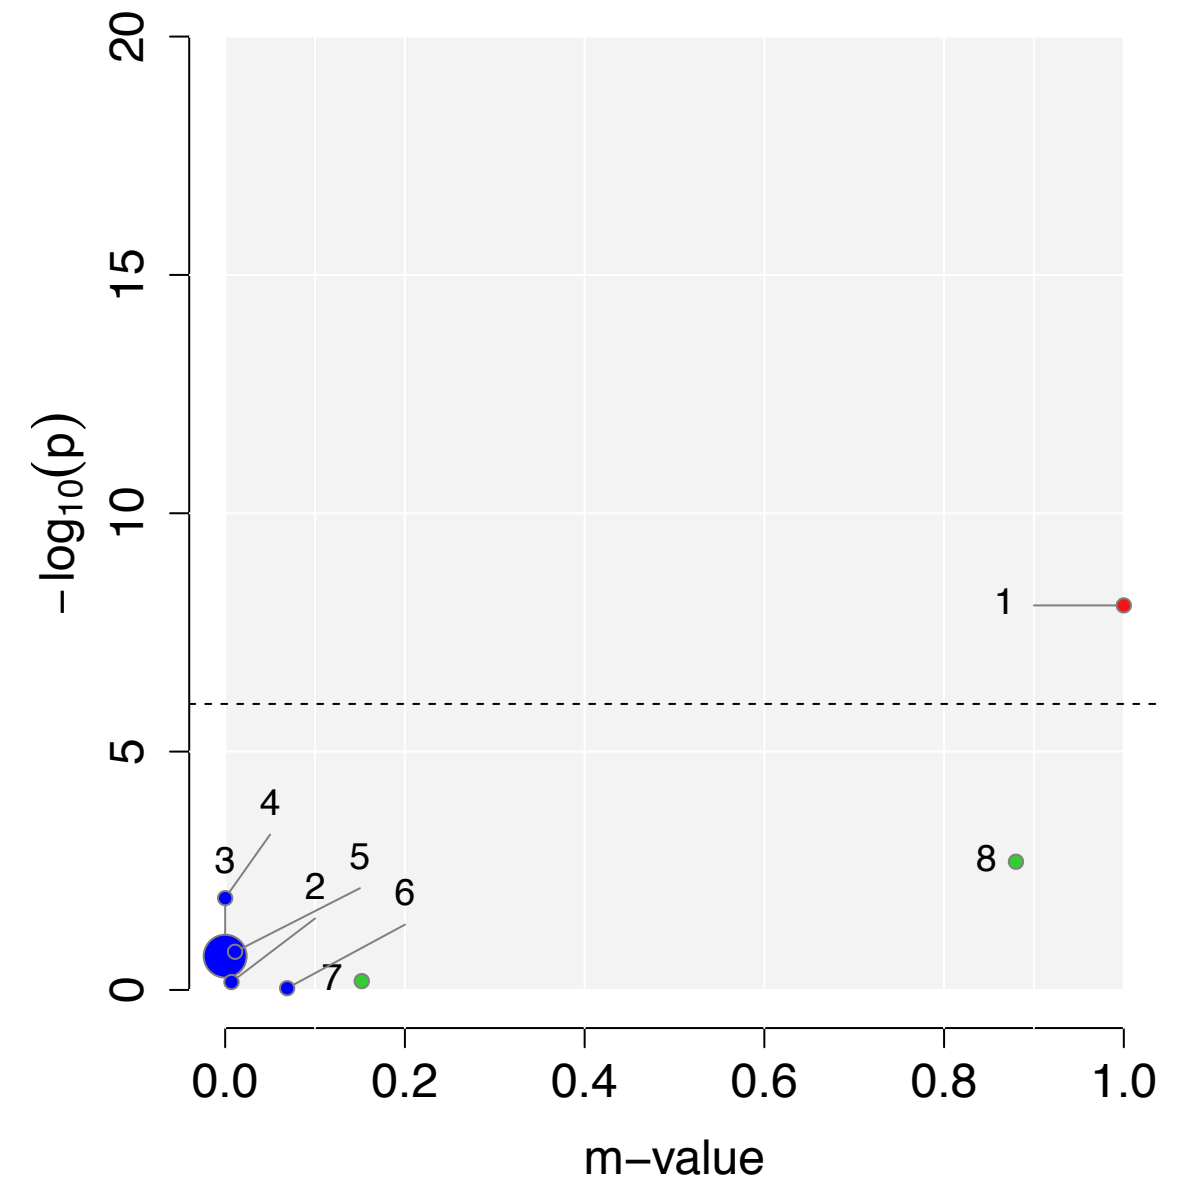

# rs11688767 (Meta $P = 2.34 \times 10^{-14}$ )

Gene : (>200kb)

## GWAS P-value

- 5.06 x 10<sup>-11</sup> ● 1.SCZ
- 0.0048 ● 2.BIP
- 6.18 x 10<sup>-9</sup> ● 3.MD
- 0.0556 ● 4.ASD
- 0.1139 ● 5.ADHD
- 0.8568 ● 6.TS
- 0.1295 ● 7.ANO
- 0.4148 ● 8.OCD

FE summary

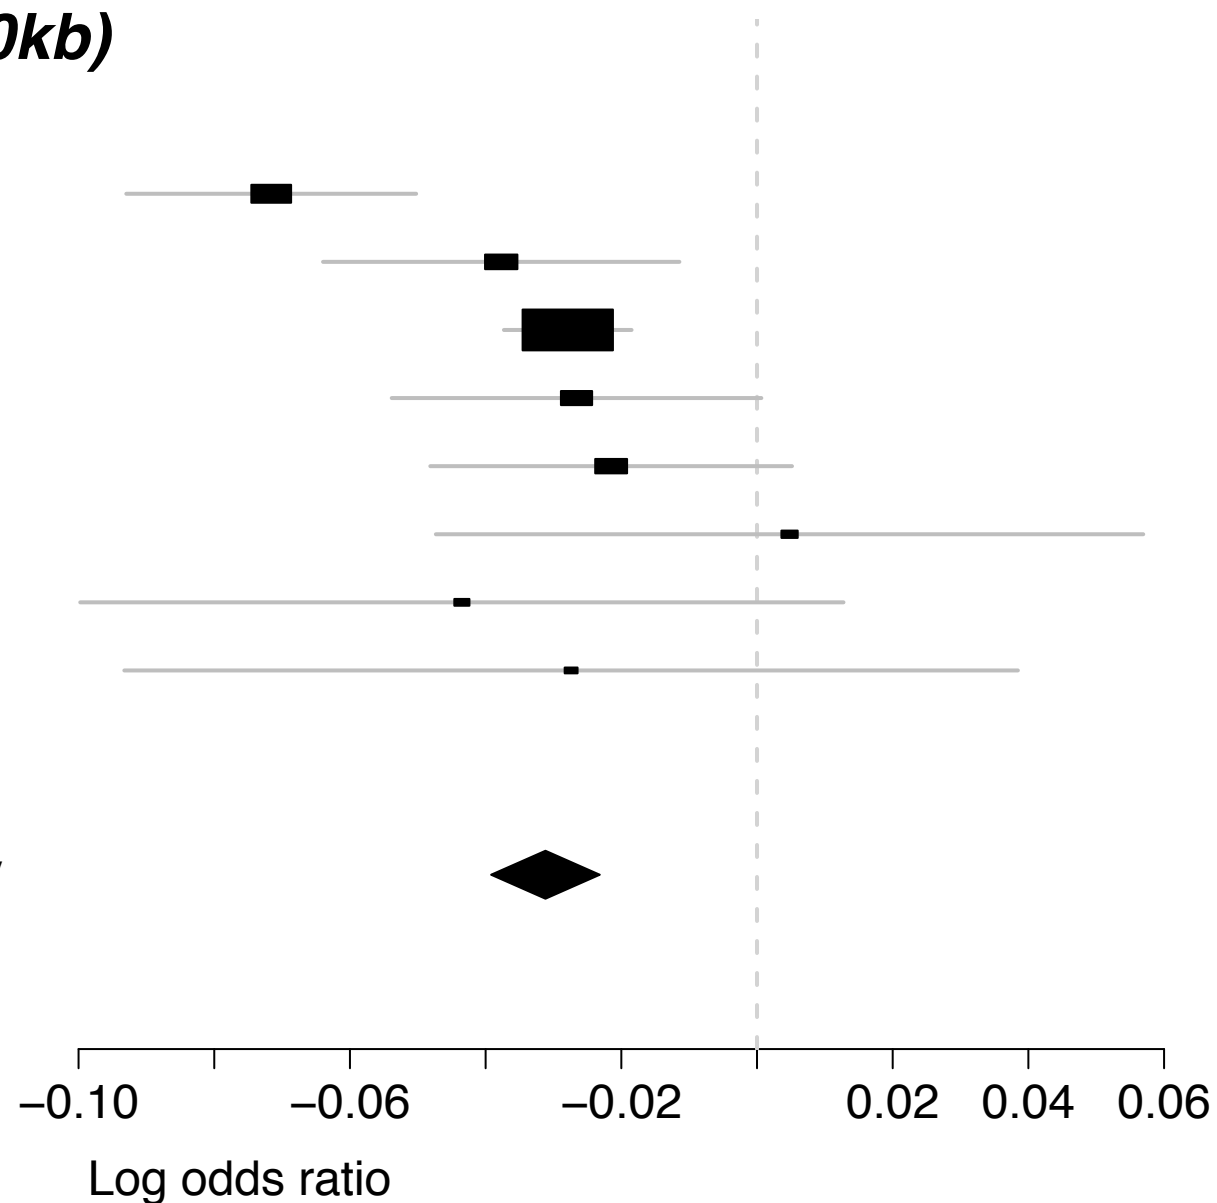

## PM-Plot

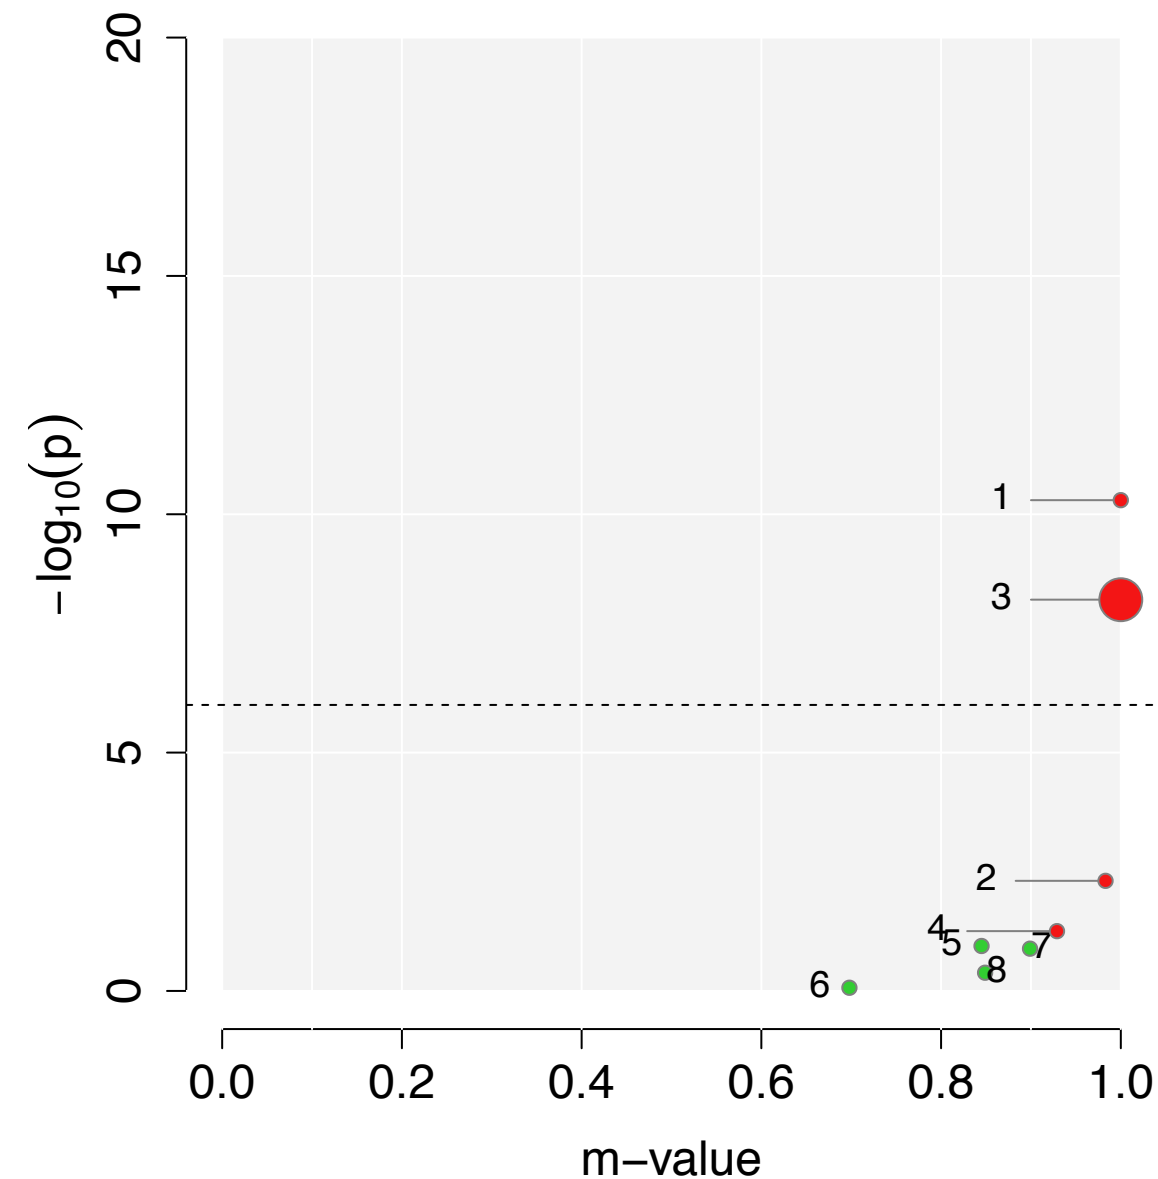

# rs11693528 (Meta $P = 9.77 \times 10^{-13}$ )

Gene : *C2orf69*, *TYW5*

## GWAS P-value

- 4.07 x 10<sup>-14</sup> ● 1.SCZ
- 8.12 x 10<sup>-5</sup> ● 2.BIP
- 0.0359 ● 3.MD
- 0.8619 ● 4.ASD
- 0.8457 ● 5.ADHD
- 0.3384 ● 6.TS
- 0.8572 ● 7.ANO
- 0.3687 ● 8.OCD

FE summary

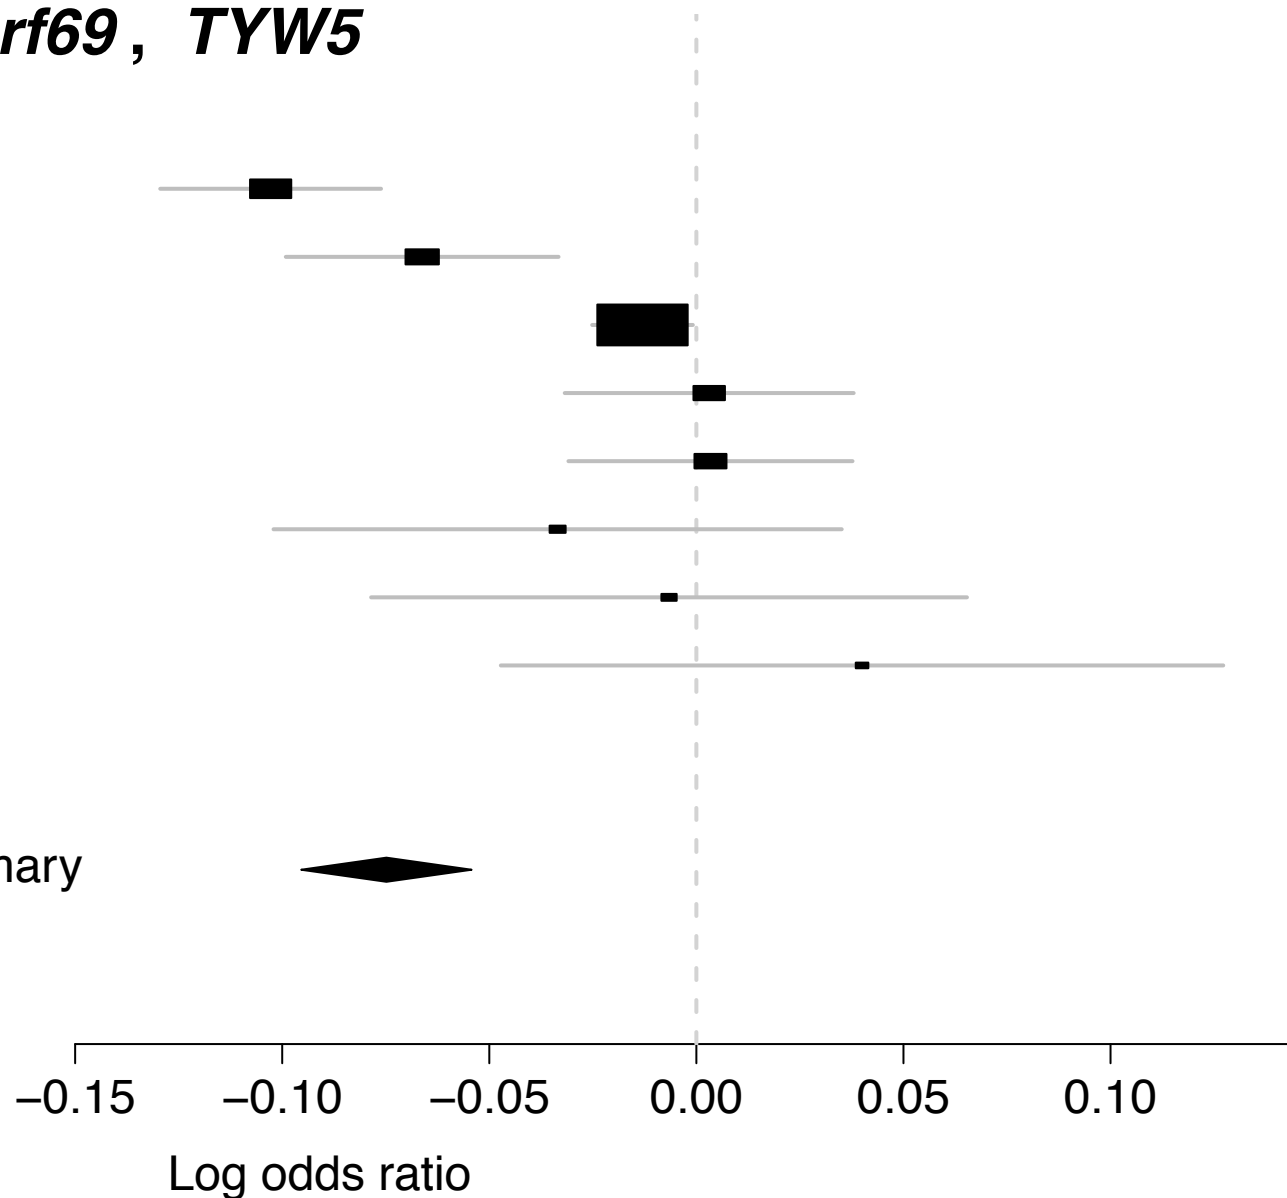

## PM-Plot

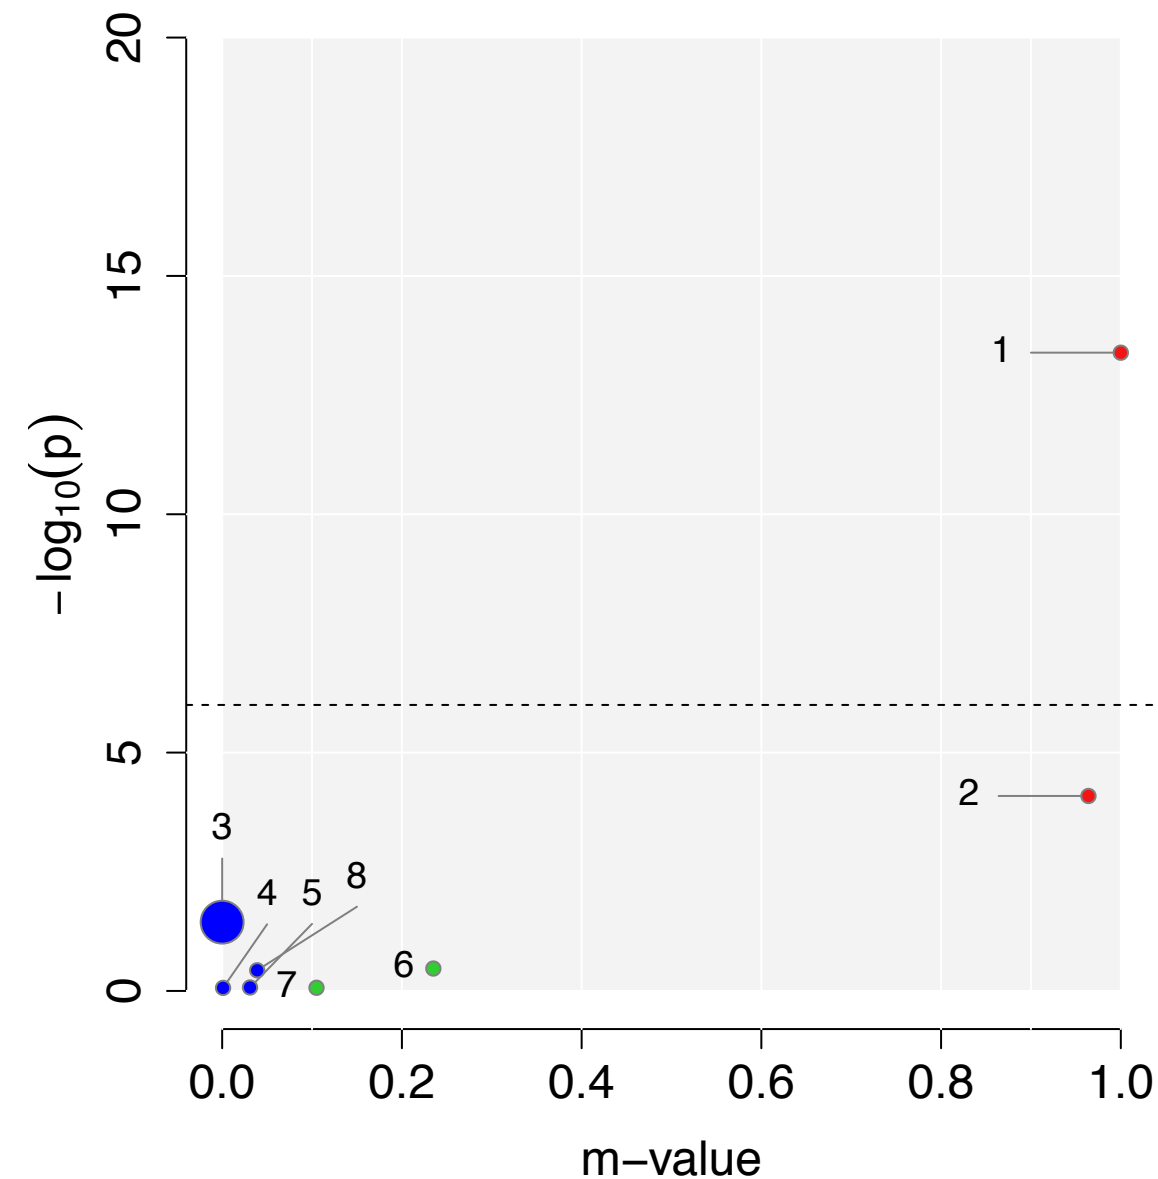



# rs11866581 (Meta $P = 2.21 \times 10^{-8}$ )

Gene : (>200kb)

## GWAS P-value

- 3.77 x 10<sup>-5</sup> ● 1.SCZ
- 0.9525 ● 2.BIP
- 1.10 x 10<sup>NA</sup> ● 3.MD
- 0.1034 ● 4.ASD
- 0.0372 ● 5.ADHD
- 0.9152 ● 6.TS
- 0.1232 ● 7.ANO
- 0.4343 ● 8.OCD

FE summary

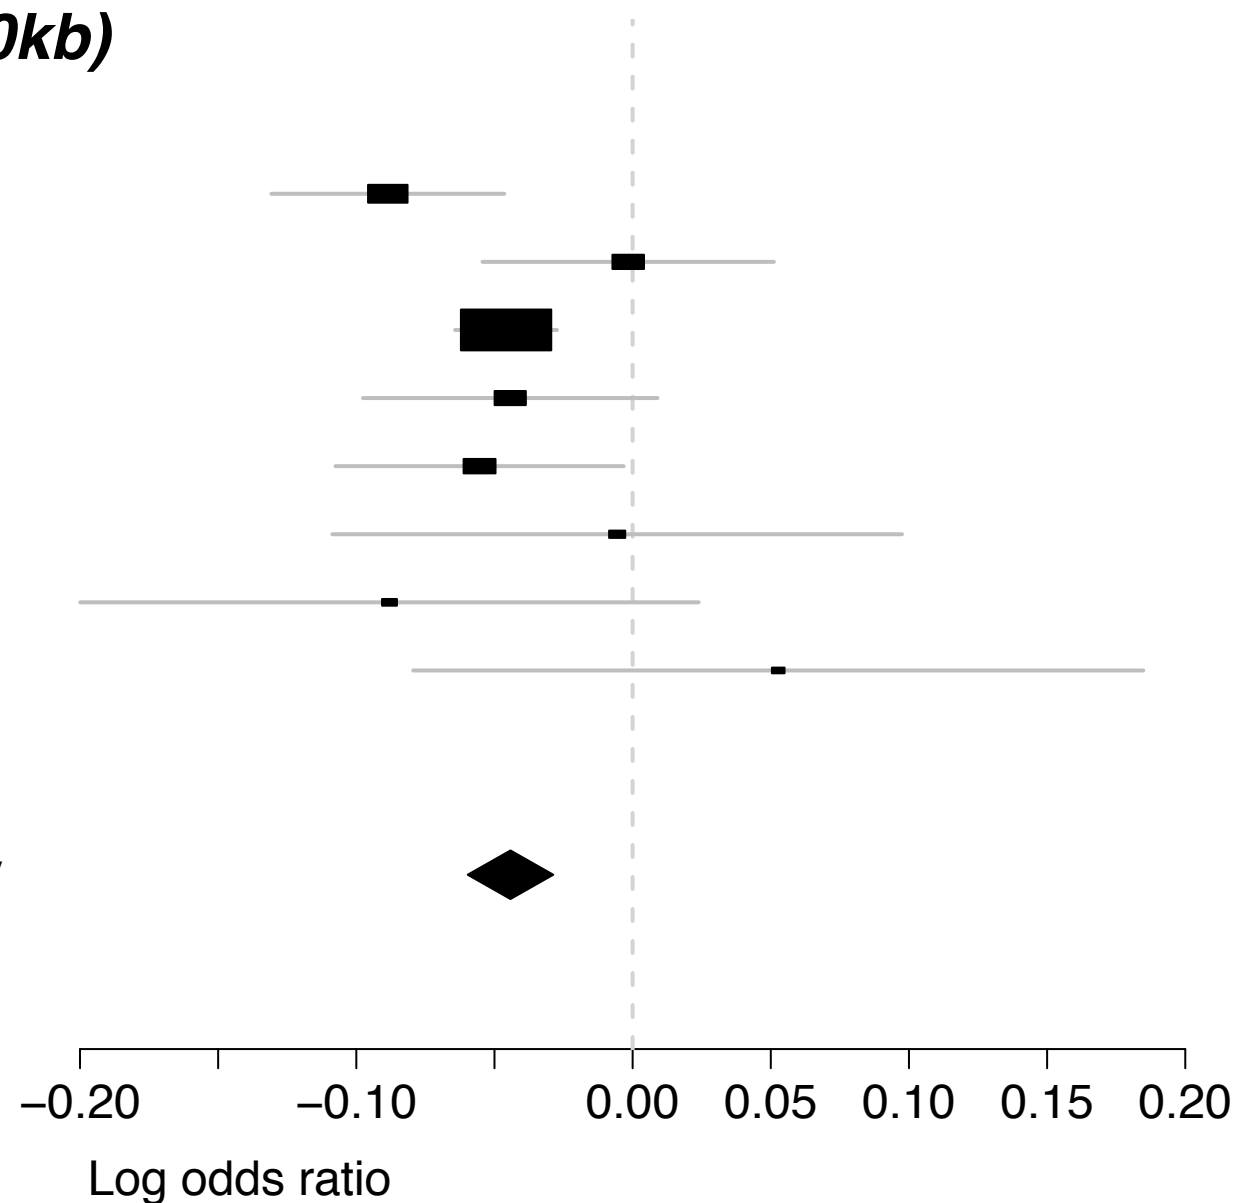

## PM-Plot

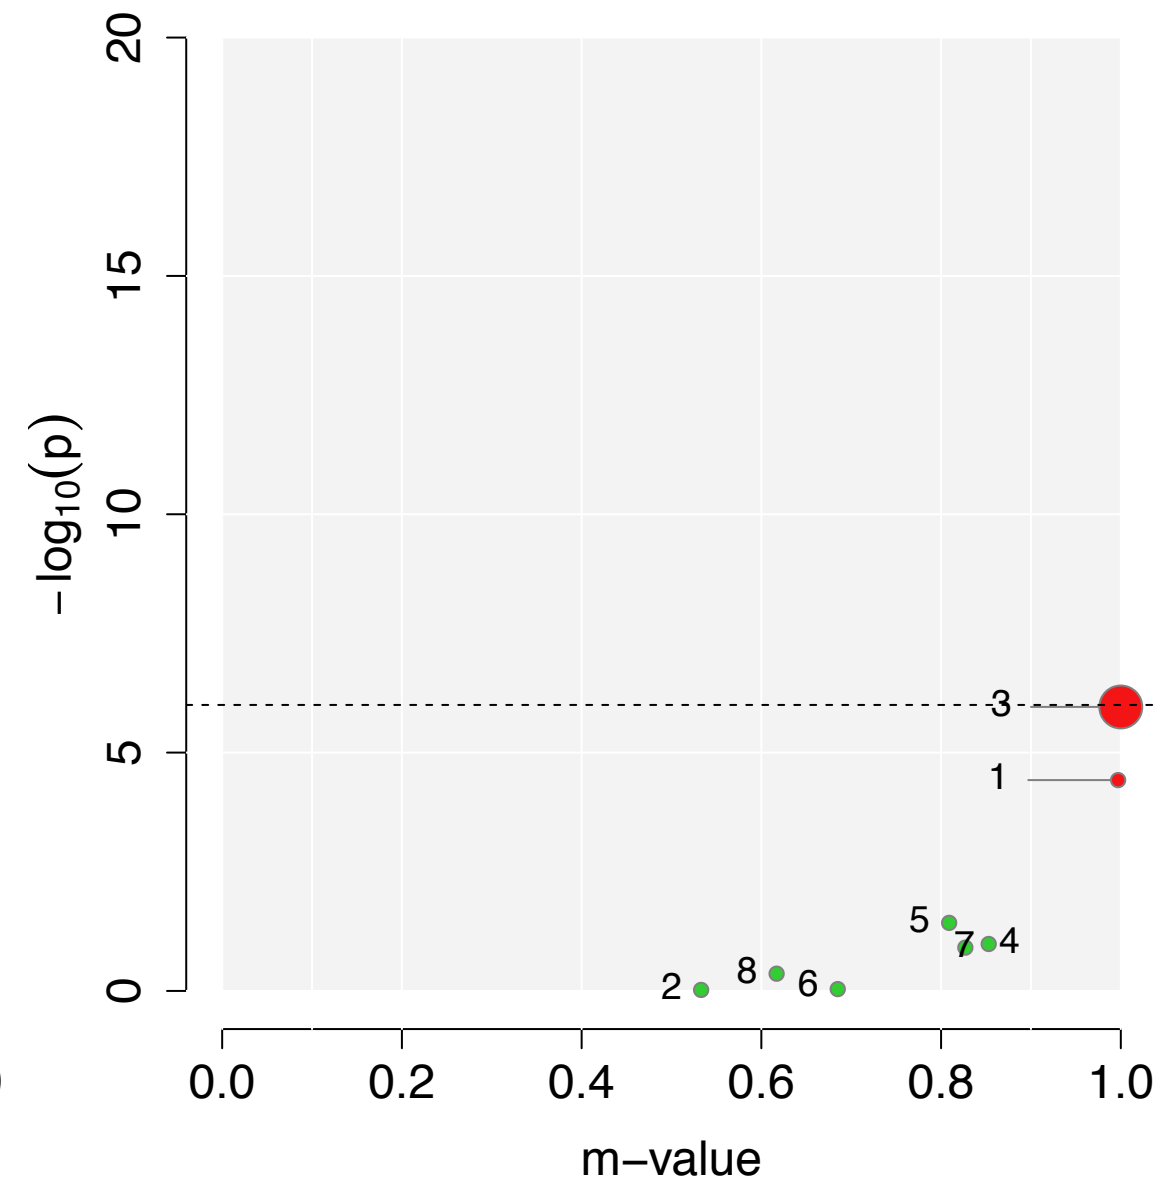

# rs11874716 (Meta $P = 8.26 \times 10^{-9}$ )

Gene : (>200kb)

## GWAS P-value

- 1.00 x 10<sup>-9</sup> ● 1.SCZ
- 0.1172 ● 2.BIP
- 7.15 x 10<sup>-6</sup> ● 3.MD
- 0.7138 ● 4.ASD
- 0.3393 ● 5.ADHD
- 0.2812 ● 6.TS
- 0.6339 ● 7.ANO
- 0.9906 ● 8.OCD

FE summary

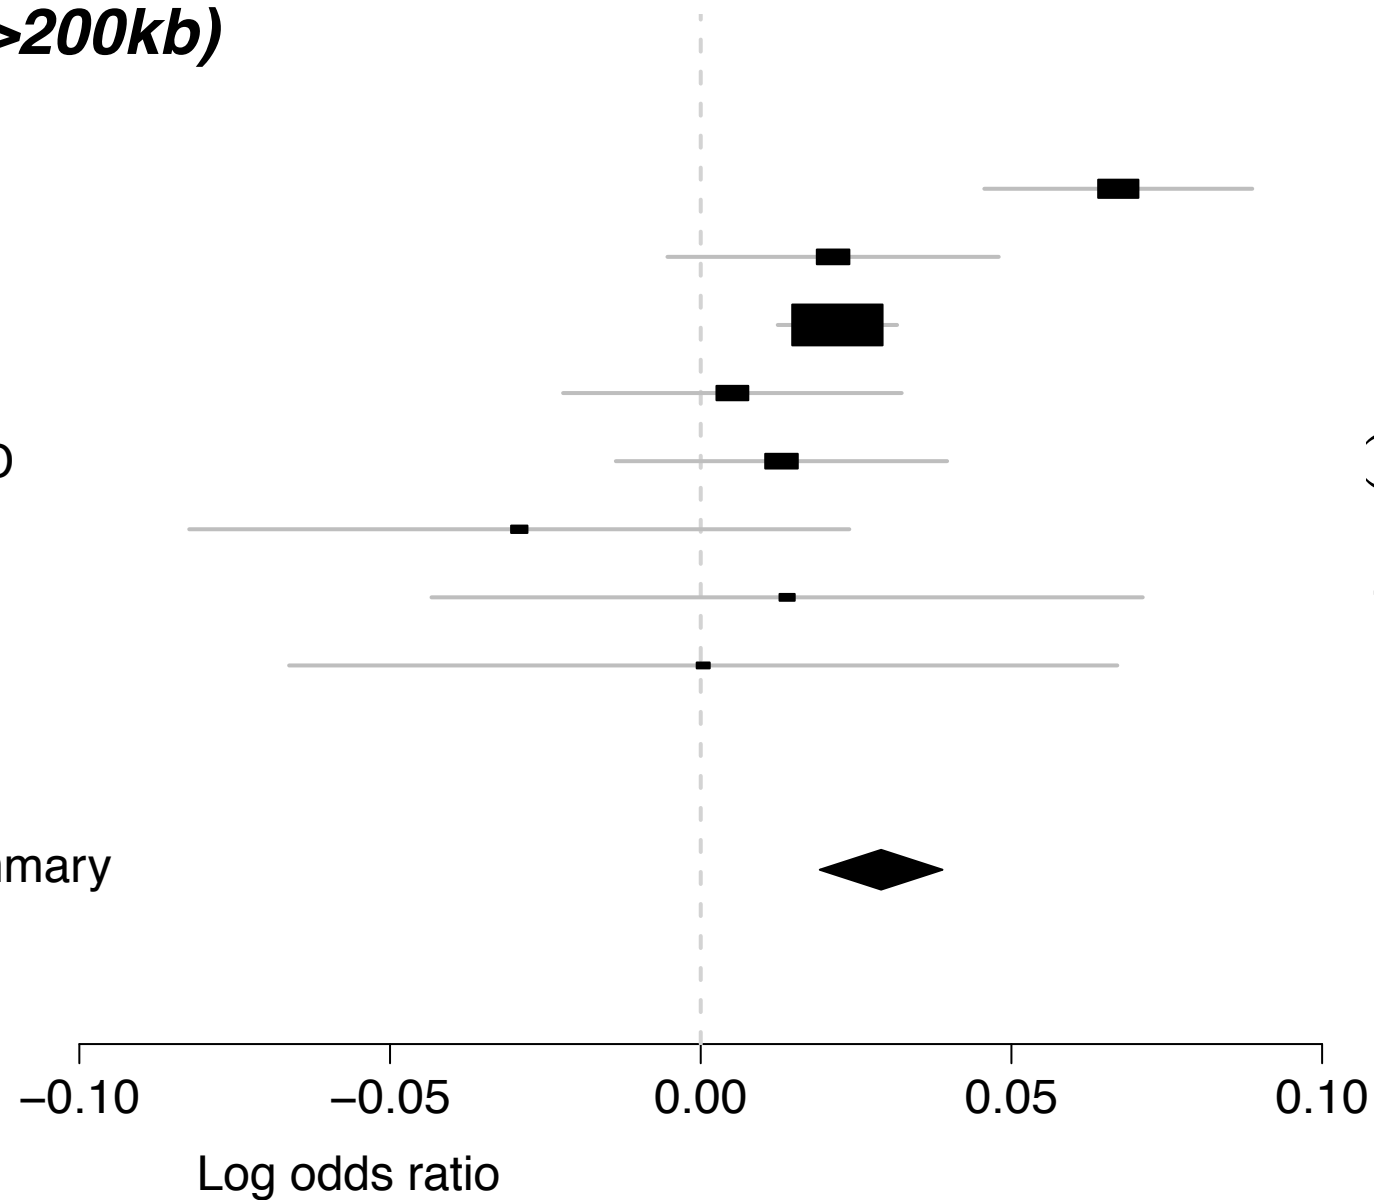

## PM-Plot

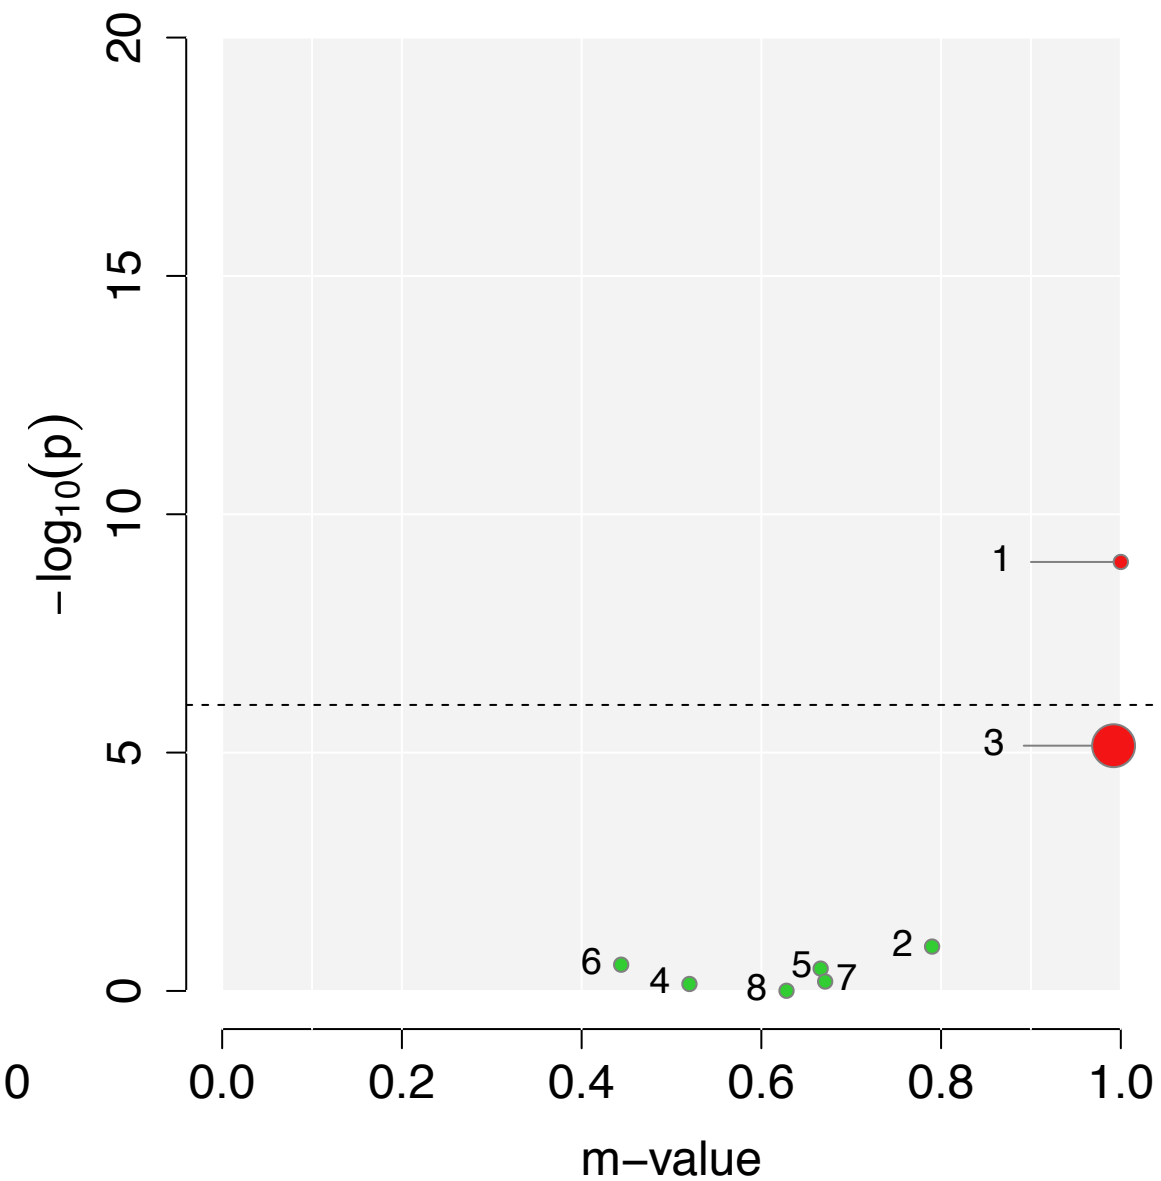

# rs11887562 (Meta $P = 2.79 \times 10^{-8}$ )

Gene : (>200kb)

## GWAS P-value

- 9.97 x 10<sup>-8</sup> ● 1.SCZ
- 6.95 x 10<sup>-5</sup> ● 2.BIP
- 0.0007 ● 3.MD
- 0.8789 ● 4.ASD
- 0.9013 ● 5.ADHD
- 0.8583 ● 6.TS
- 0.4416 ● 7.ANO
- 0.1034 ● 8.OCD

FE summary

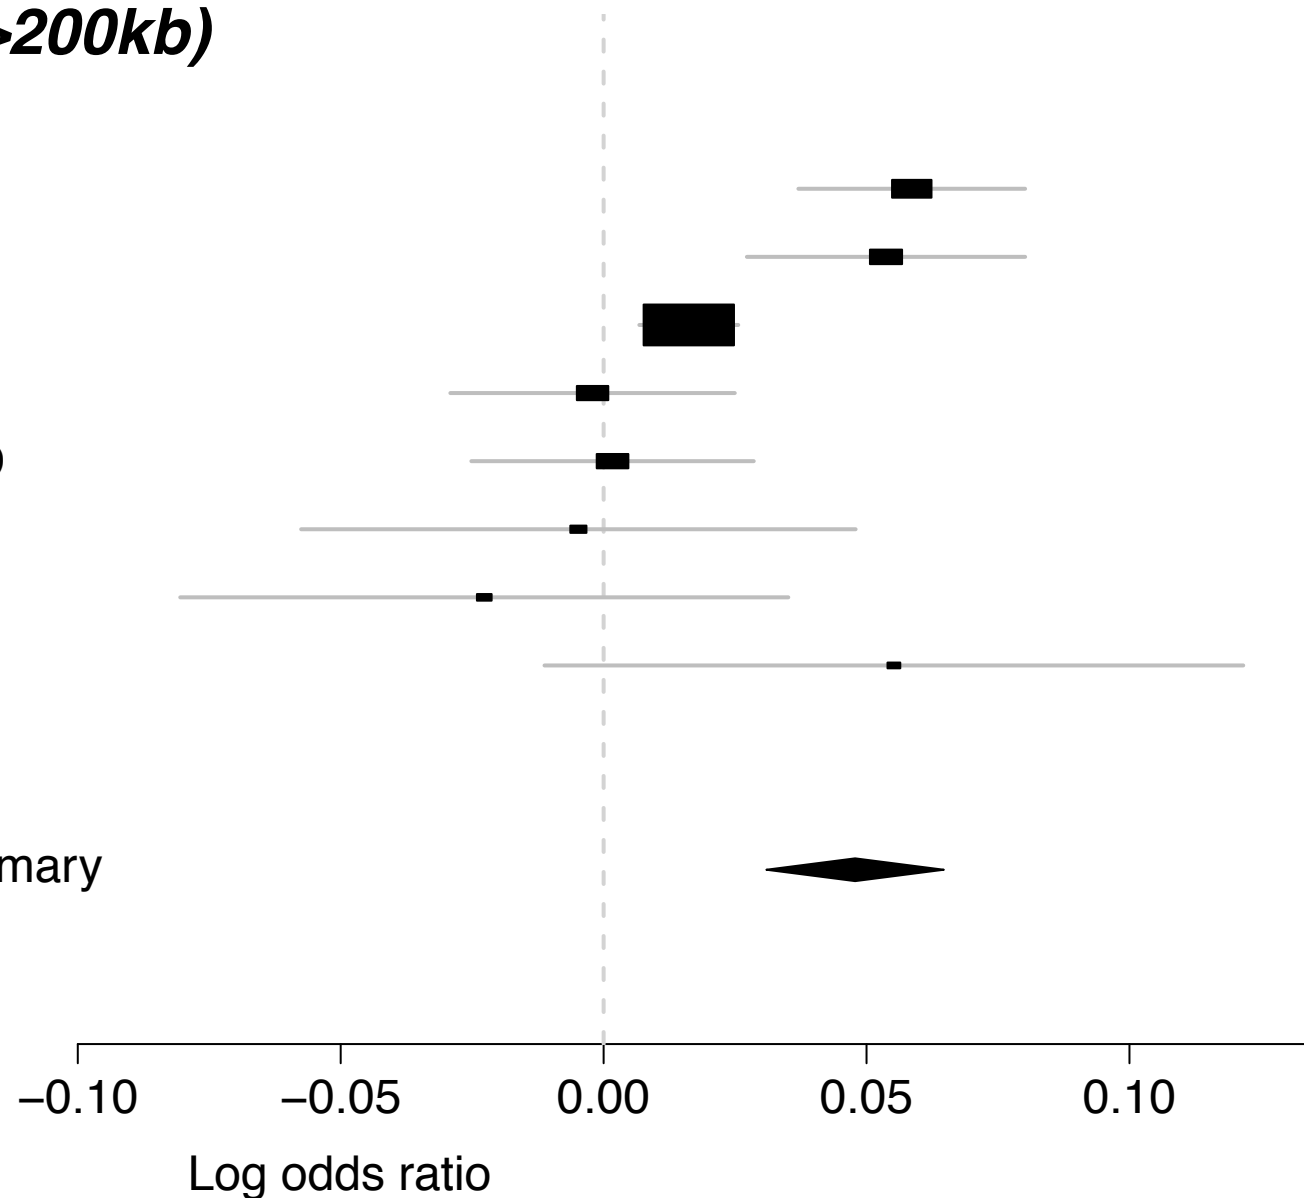

## PM-Plot

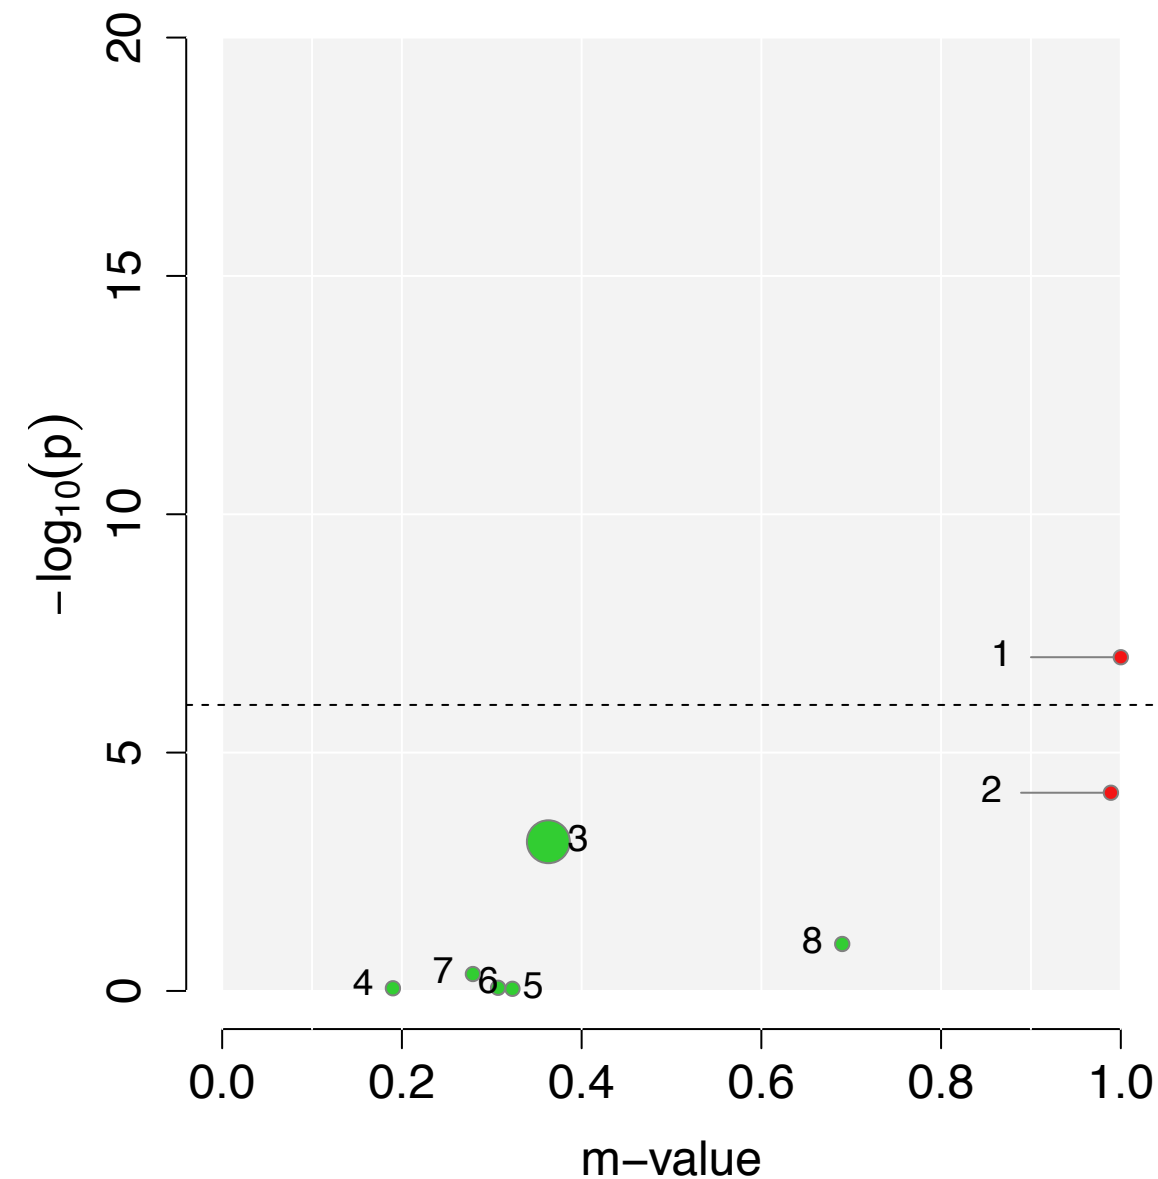

# rs12129573 (Meta $P = 5.2e \times 10^{-17}$ )

Gene : (>200kb)

## GWAS P-value

- 9.05 x 10<sup>-10</sup> ● 1.SCZ
- 0.0233 ● 2.BIP
- 5.21 x 10<sup>-12</sup> ● 3.MD
- 0.0723 ● 4.ASD
- 0.0010 ● 5.ADHD
- 0.4873 ● 6.TS
- 0.3424 ● 7.ANO
- 0.3022 ● 8.OCD

FE summary

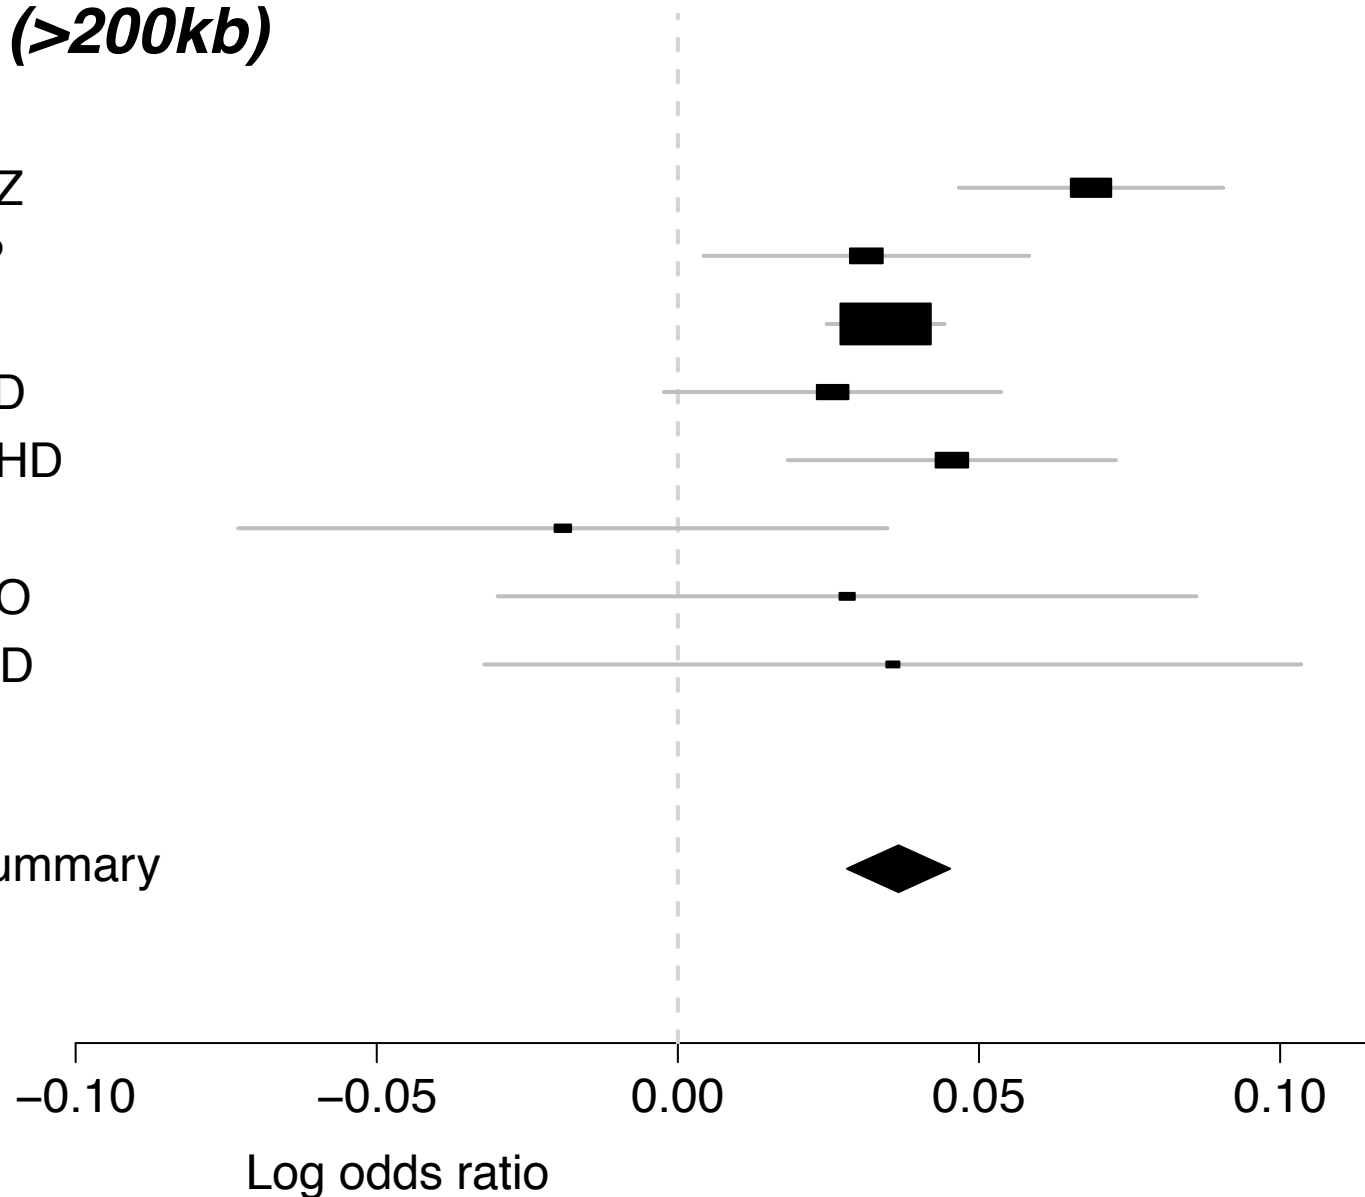

## PM-Plot

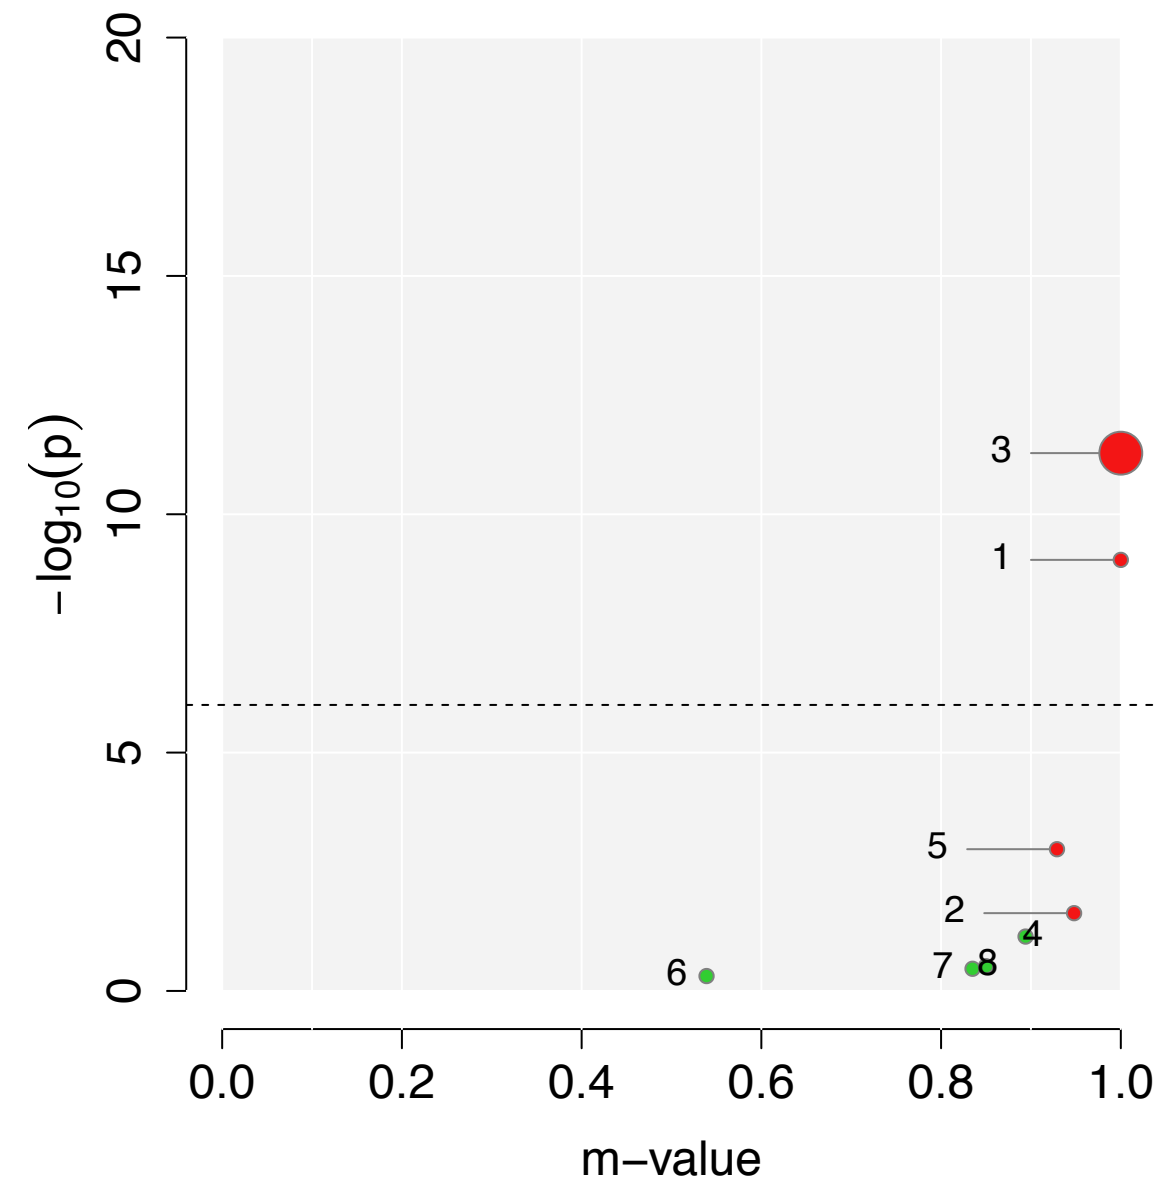

# rs12474906 (Meta $P = 8.05 \times 10^{-9}$ )

Gene : *RBKS*, *MRPL33*

## GWAS P-value

- 5.60 x 10<sup>-8</sup> ● 1.SCZ
- 9.85 x 10<sup>-5</sup> ● 2.BIP
- 0.0036 ● 3.MD
- 0.7347 ● 4.ASD
- 0.6315 ● 5.ADHD
- 0.7065 ● 6.TS
- 0.8131 ● 7.ANO
- 0.0202 ● 8.OCD

FE summary

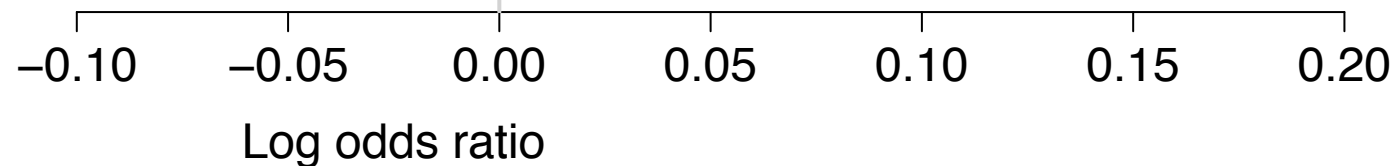

## PM-Plot

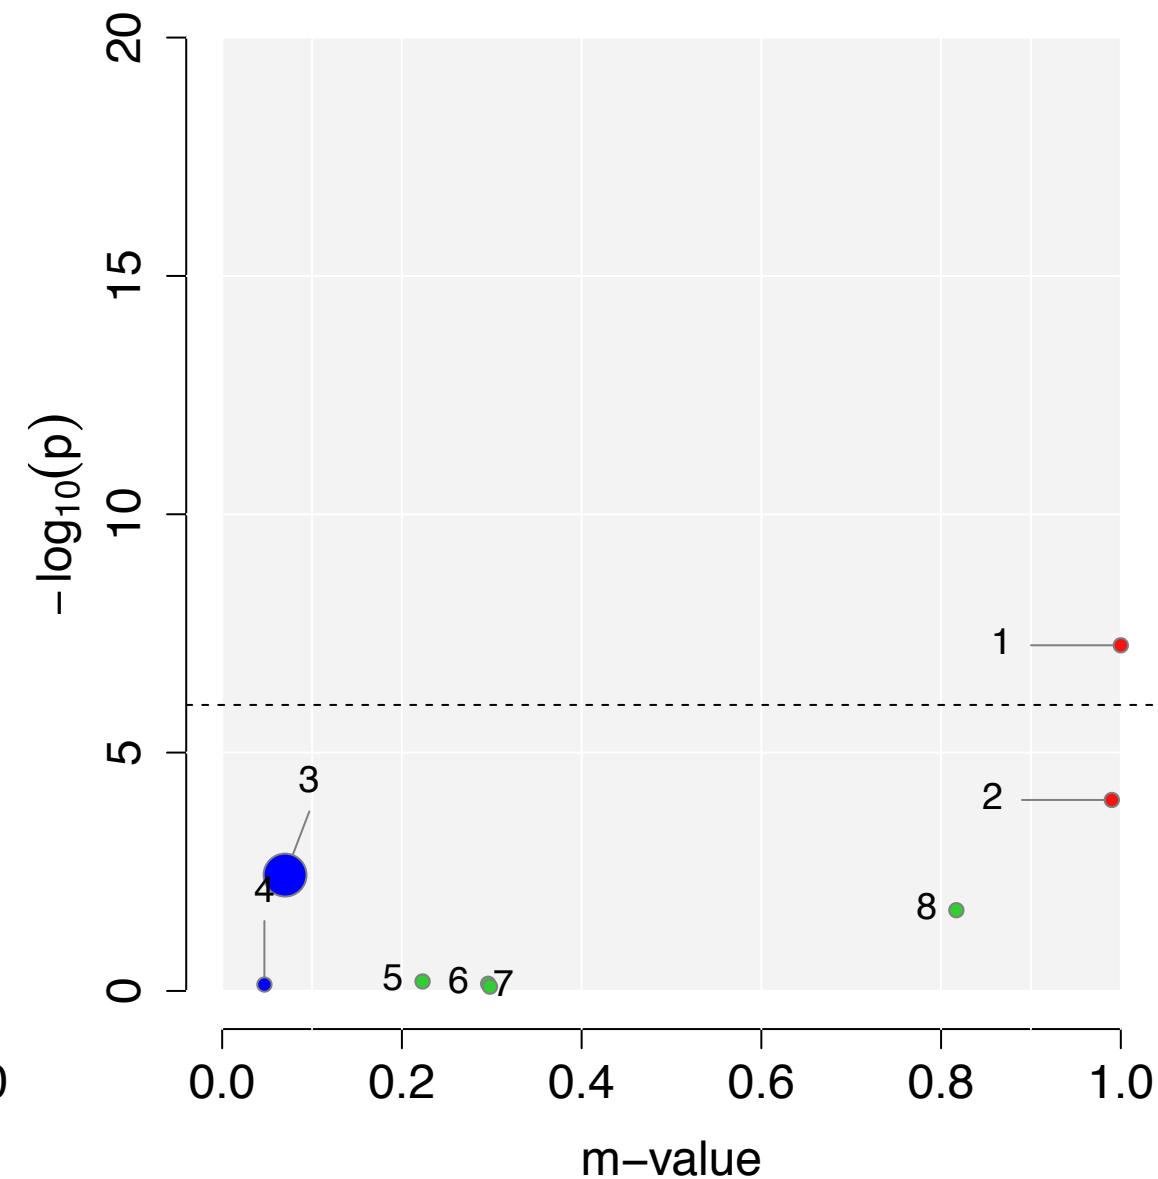

# rs12658451 (Meta $P = 1.55 \times 10^{-16}$ )

Gene : (>200kb)

## GWAS P-value

- 2.56 x 10<sup>-5</sup> ● 1.SCZ
- 0.0069 ● 2.BIP
- 1.69 x 10<sup>0</sup> ● 3.MD
- 1.30 x 10<sup>-5</sup> ● 4.ASD
- 7.16 x 10<sup>-6</sup> ● 5.ADHD
- 0.0055 ● 6.TS
- 0.0011 ● 7.ANO
- 0.5018 ● 8.OCD

FE summary

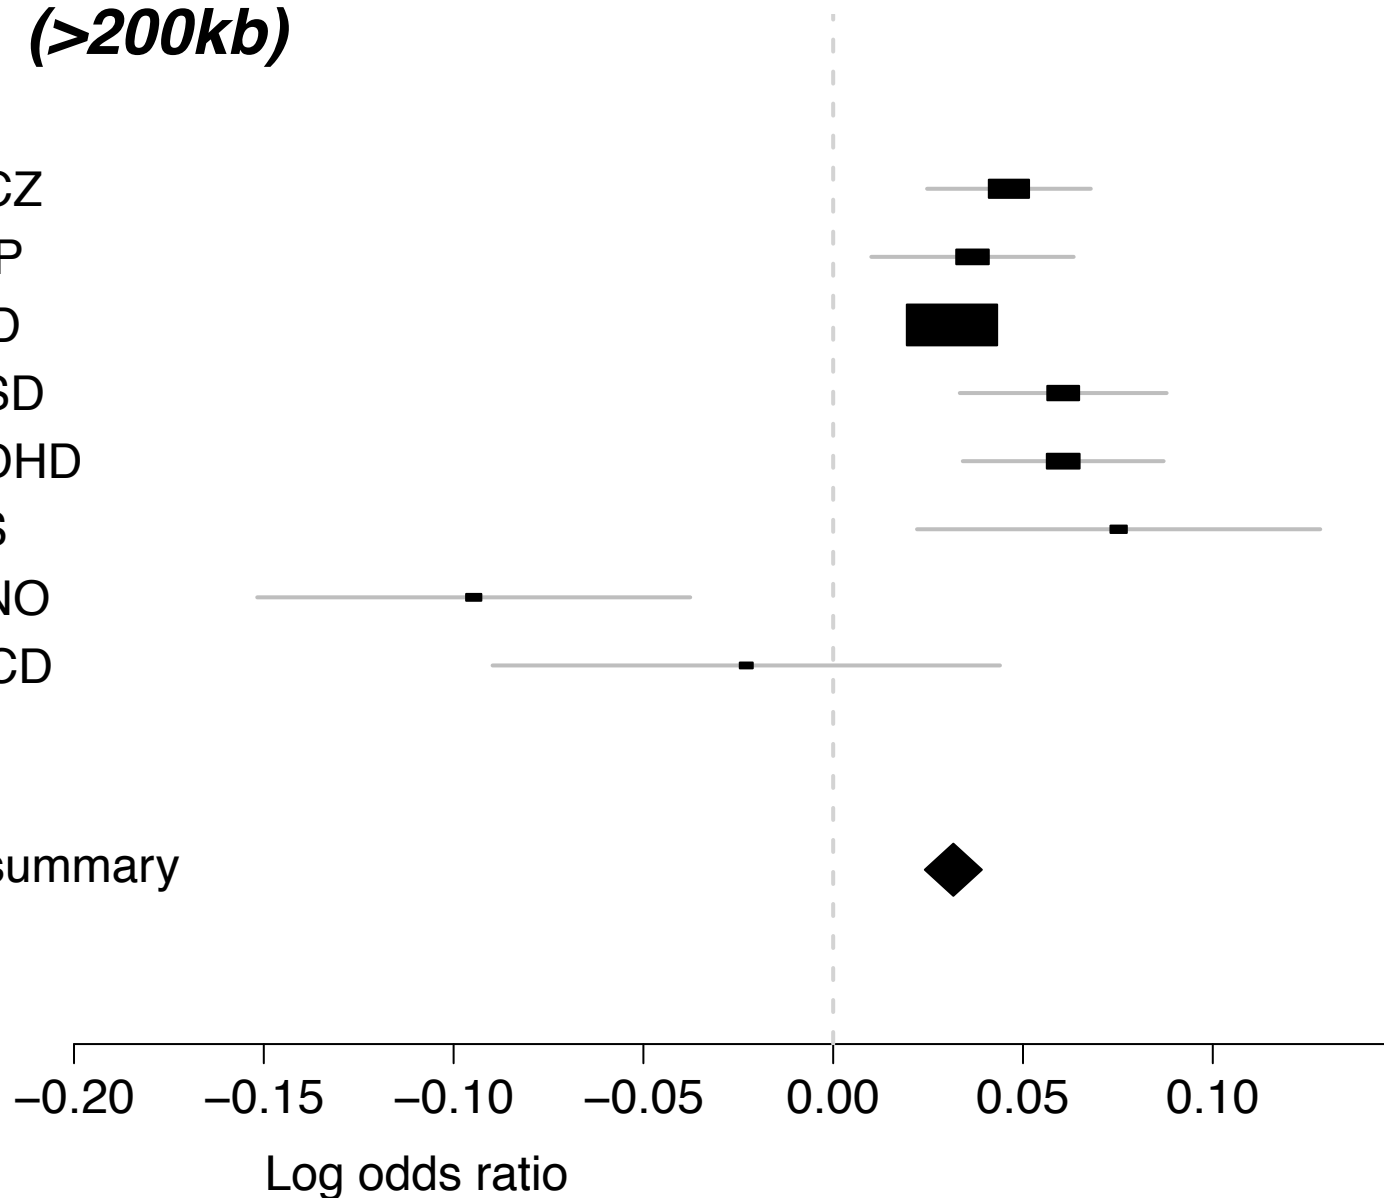

## PM-Plot

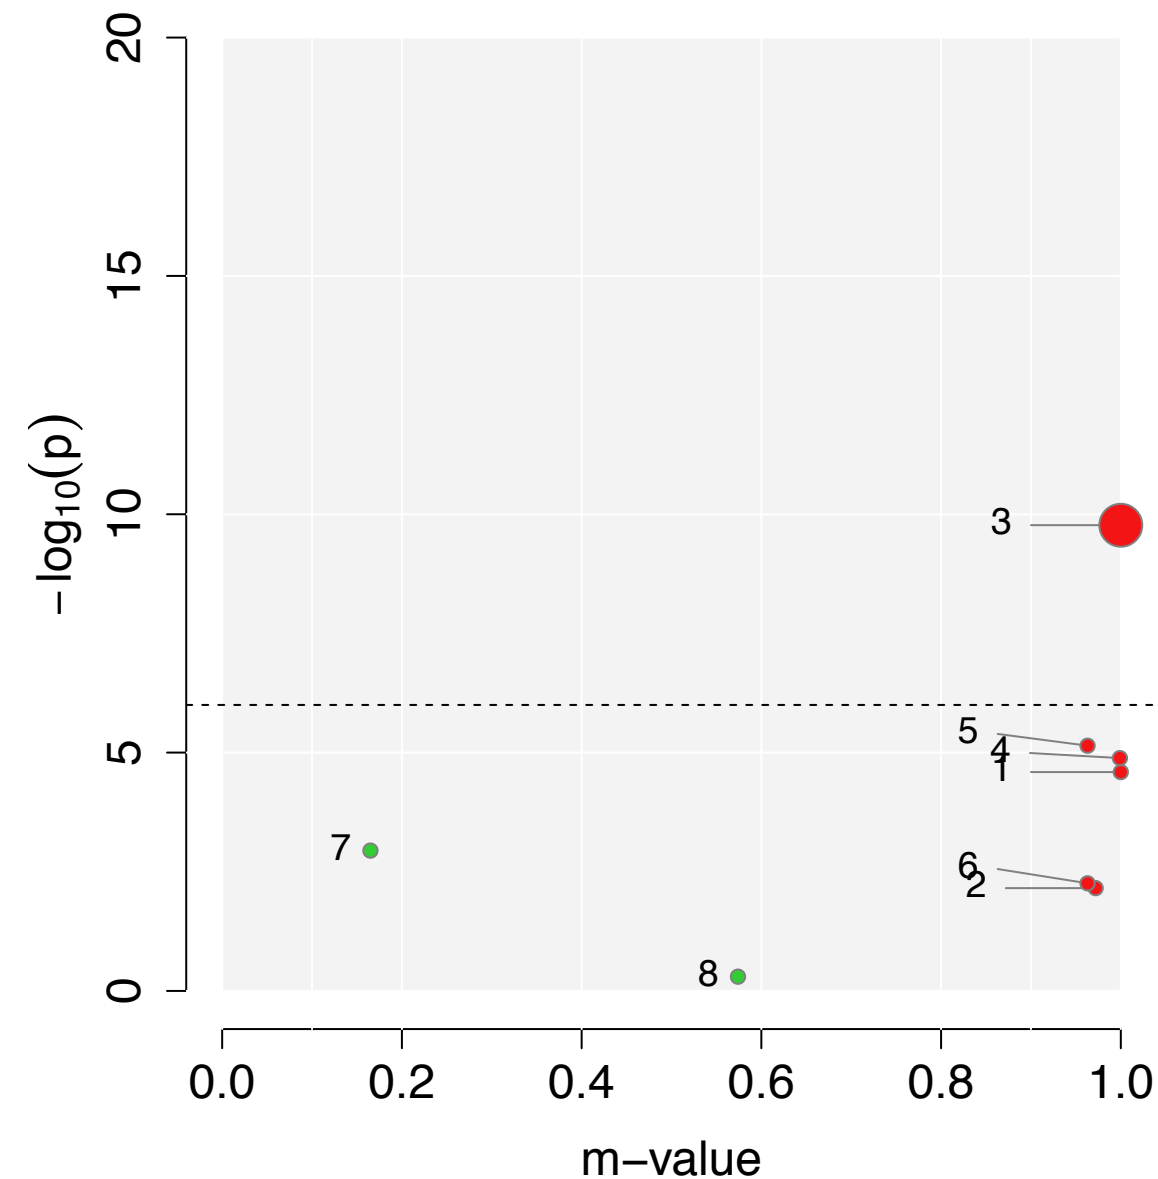

# rs12668848 (Meta $P = 1.15 \times 10^{-13}$ )

Gene : *MAD1L1*

## GWAS P-value

- 1.39 x 10<sup>-13</sup> ● 1.SCZ
- 3.13 x 10<sup>-6</sup> ● 2.BIP
- 0.0107 ● 3.MD
- 0.8637 ● 4.ASD
- 0.9244 ● 5.ADHD
- 0.2225 ● 6.TS
- 0.3881 ● 7.ANO
- 0.7120 ● 8.OCD

FE summary

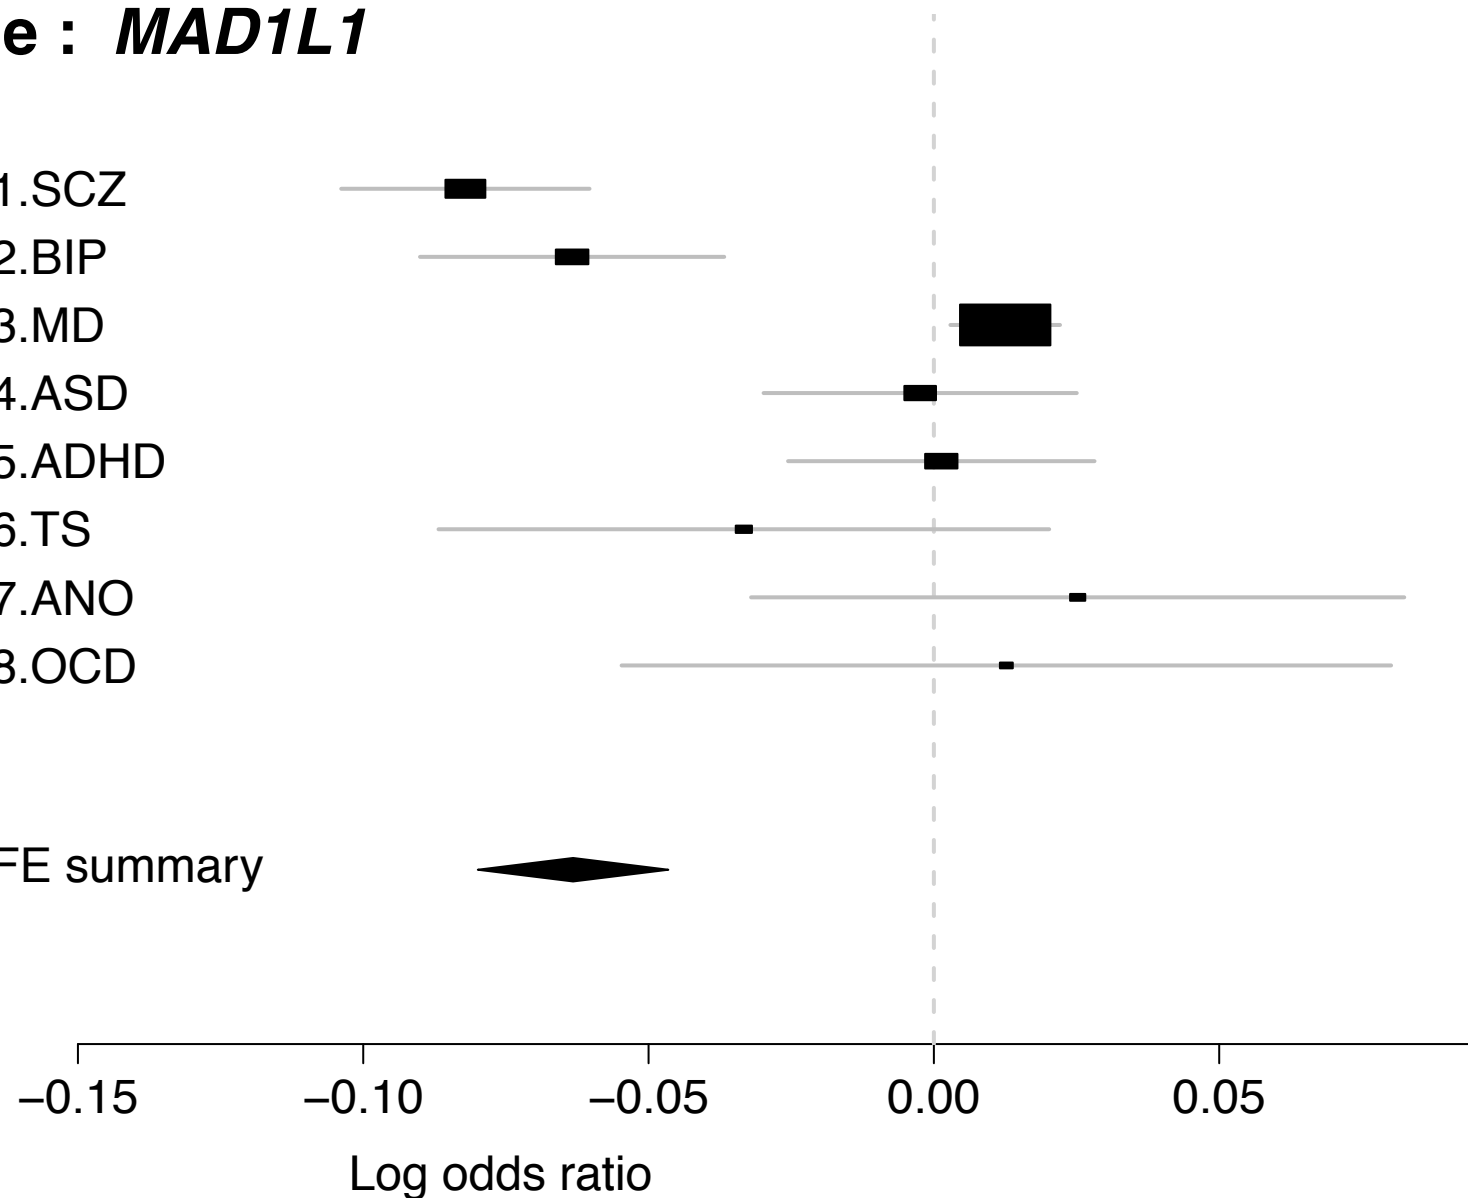

## PM-Plot

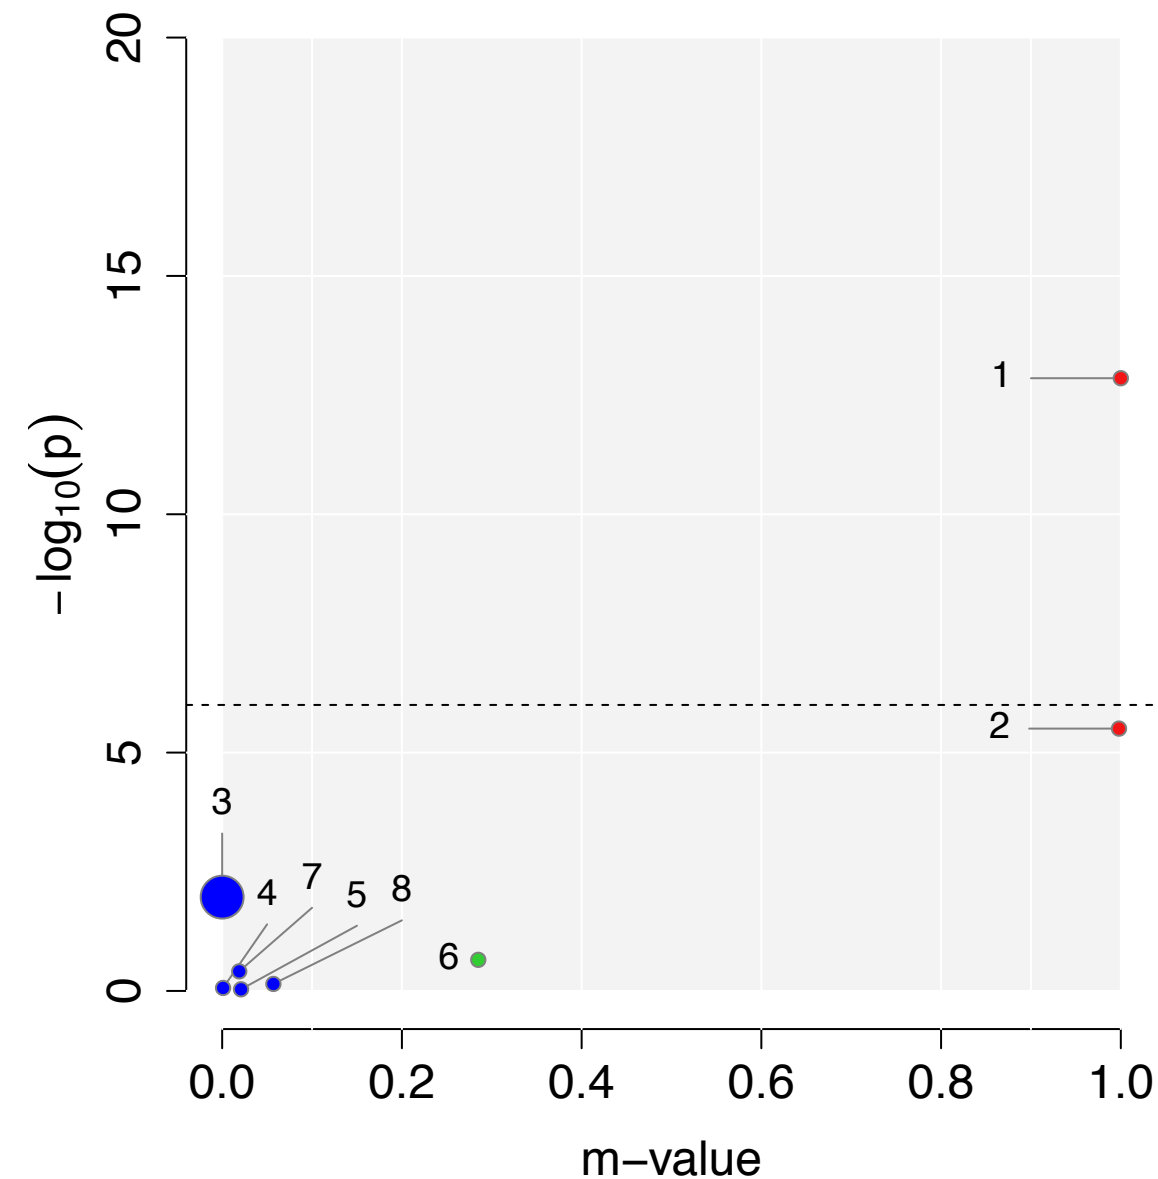

rs12704290 (Meta  $P = 2.83 \times 10^{-10}$ )

Gene : *GRM3*, *KIAA1324L*

GWAS P-value

- 2.68 x 10<sup>-10</sup> ● 1.SCZ
- 2.39 x 10<sup>-5</sup> ● 2.BIP
- 0.3171 ● 3.MD
- 0.1567 ● 4.ASD
- 0.2381 ● 5.ADHD
- 0.9785 ● 6.TS
- 0.7366 ● 7.ANO
- 0.8686 ● 8.OCD

FE summary

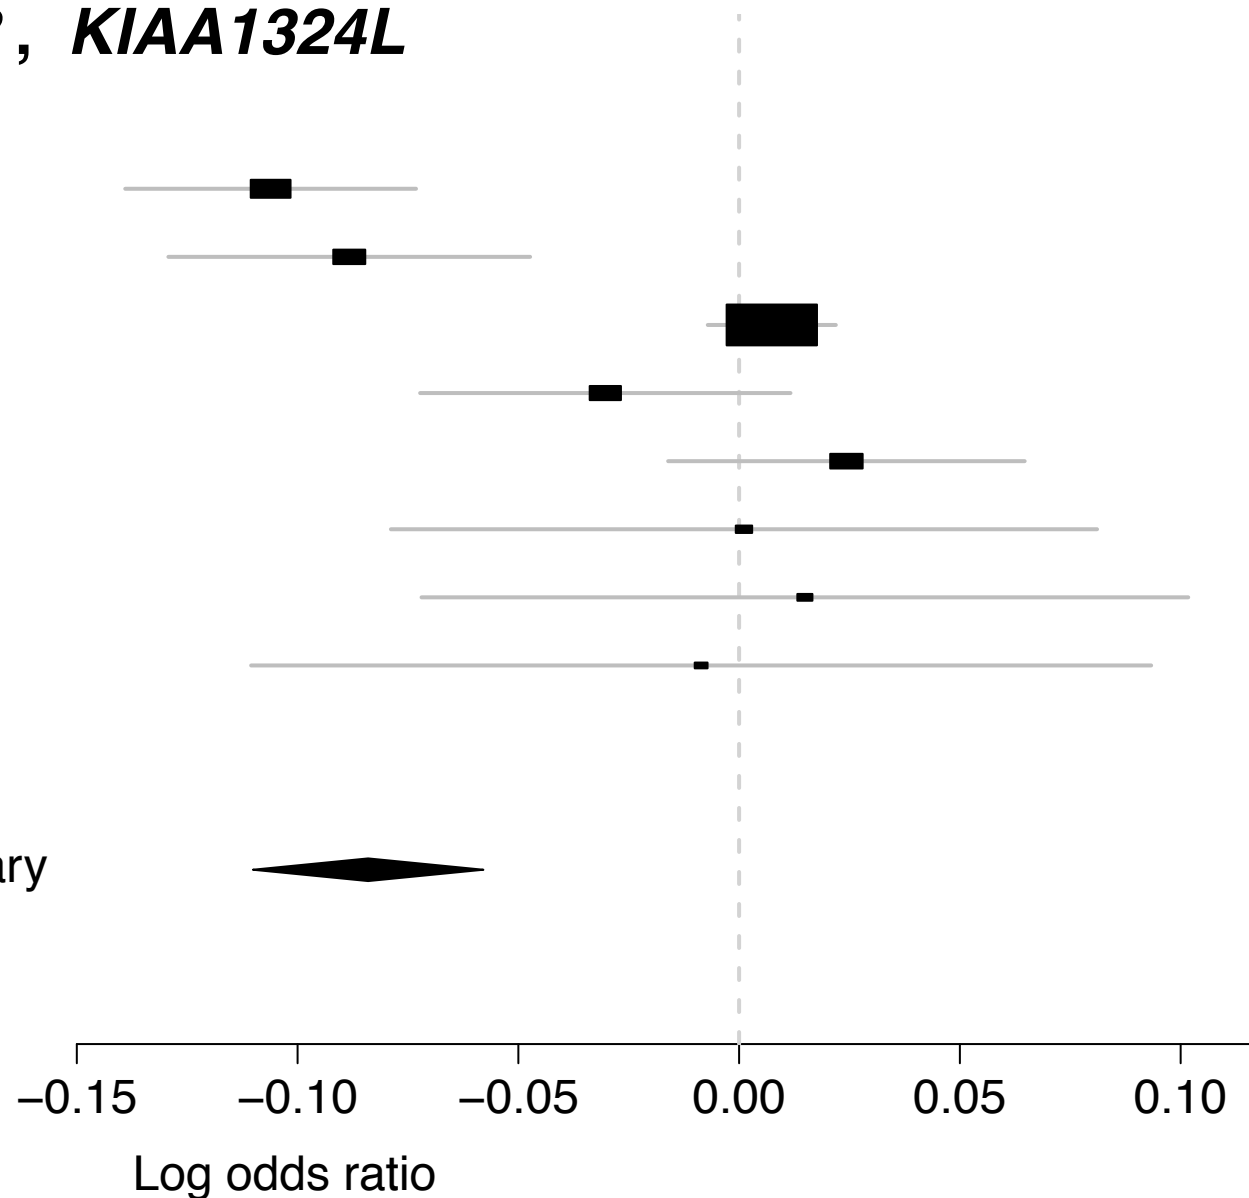

PM-Plot

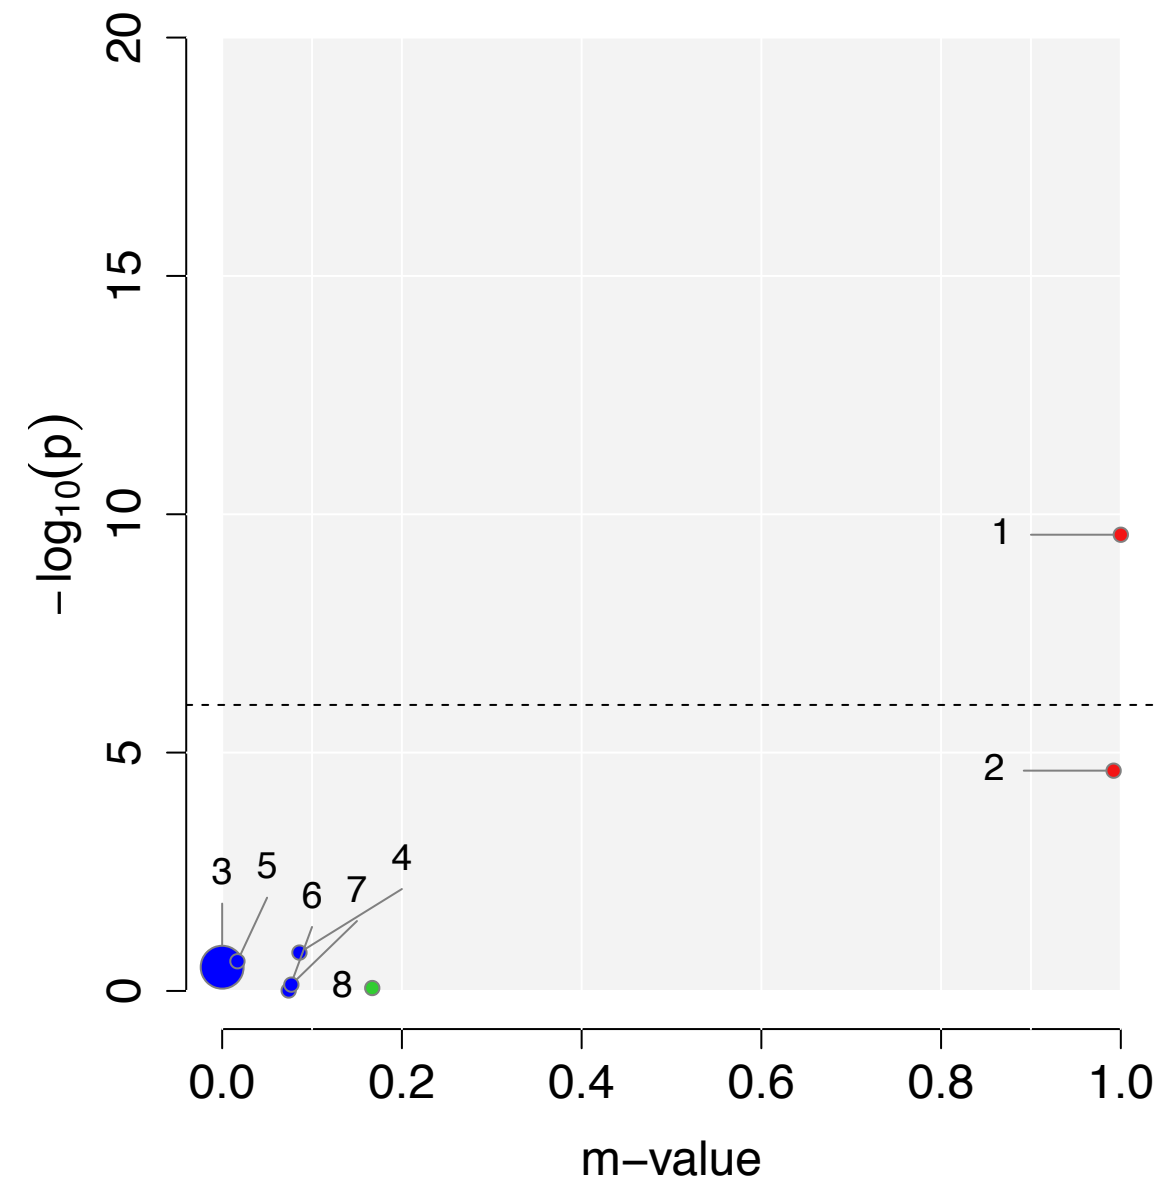



# rs12712388 (Meta $P = 1.02 \times 10^{-10}$ )

Gene : (>200kb)

## GWAS P-value

- 8.29 x 10<sup>-7</sup> ● 1.SCZ
- 0.0001 ● 2.BIP
- 1.32 x 10<sup>-6</sup> ● 3.MD
- 0.3569 ● 4.ASD
- 0.0038 ● 5.ADHD
- 0.9506 ● 6.TS
- 0.7974 ● 7.ANO
- 0.1711 ● 8.OCD

FE summary

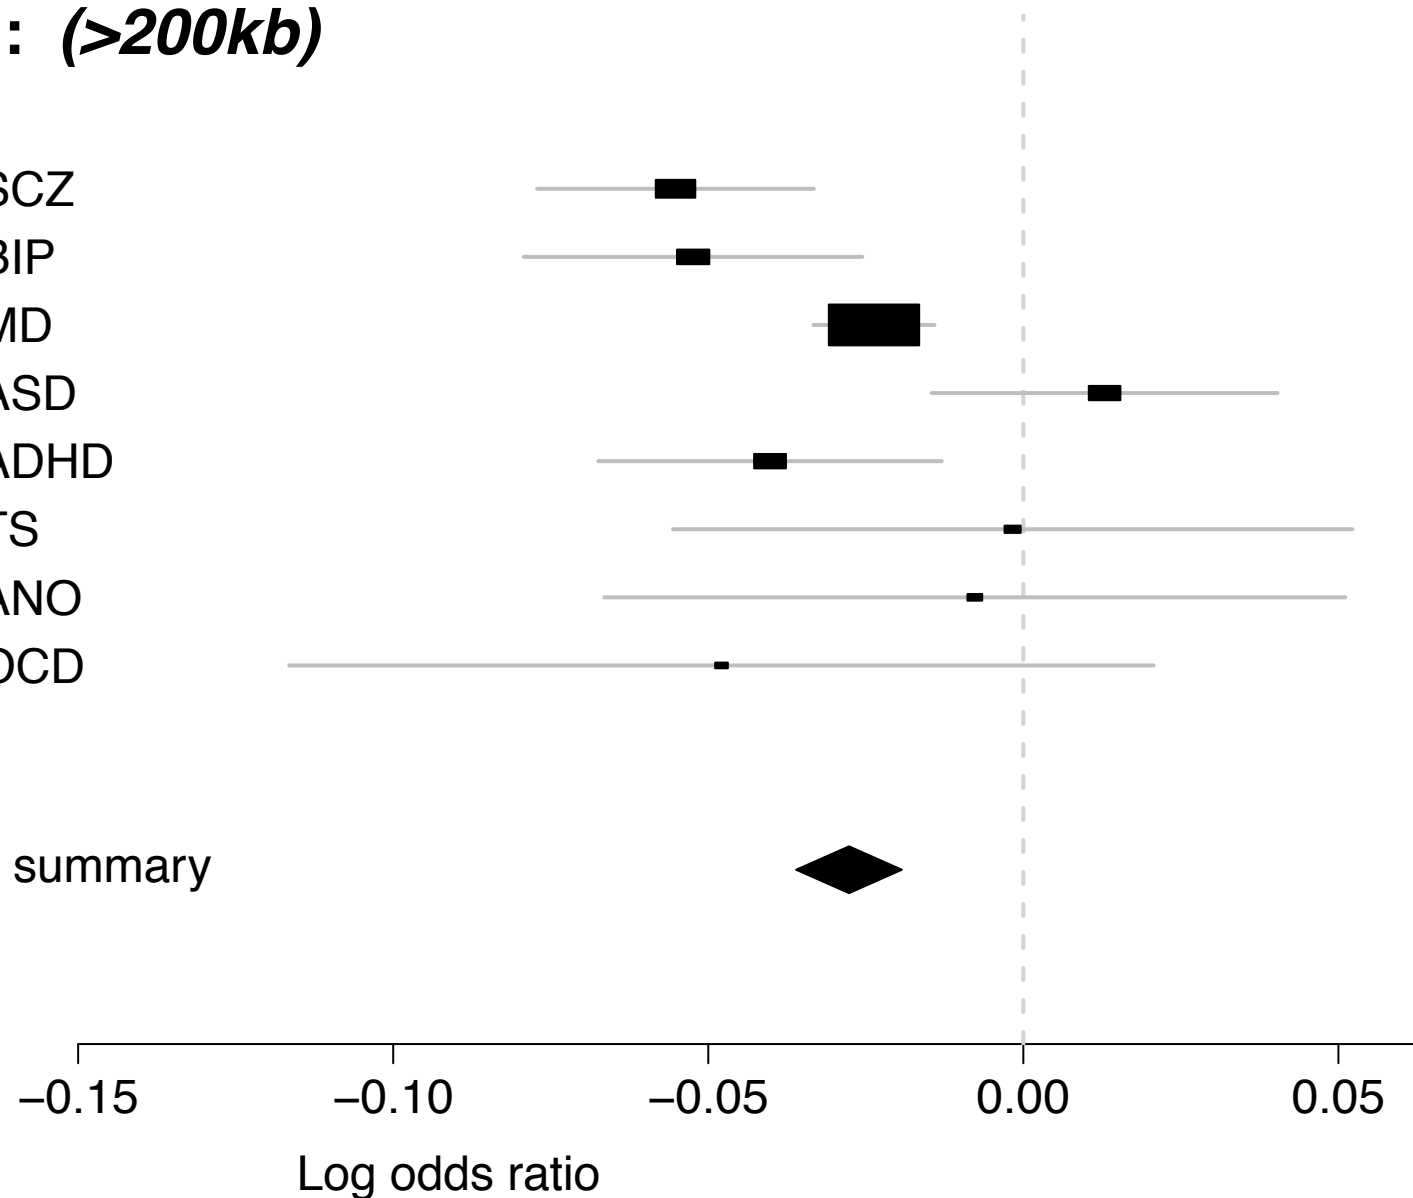

## PM-Plot

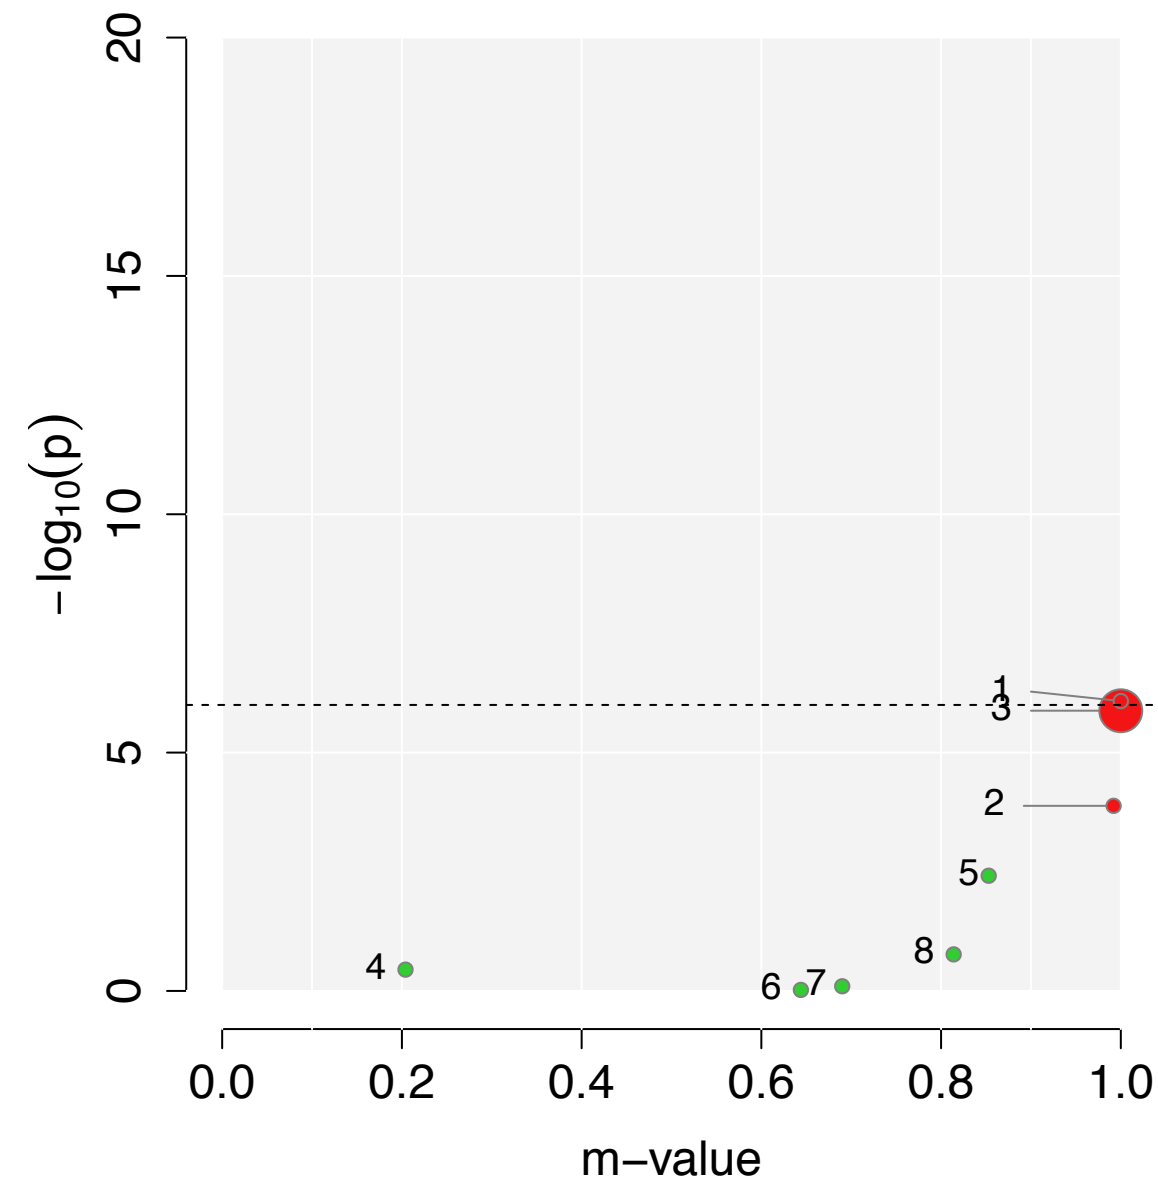

# rs12826178 (Meta $P = 6.01 \times 10^{-10}$ )

Gene : *SHMT2*, *NXPH4*

## GWAS P-value

- 5.43 x 10<sup>-2</sup> ● 1.SCZ
- 0.4976 ● 2.BIP
- 0.2372 ● 3.MD
- 0.1034 ● 4.ASD
- 0.9421 ● 5.ADHD
- 0.2369 ● 6.TS
- 0.8823 ● 7.ANO
- 0.6241 ● 8.OCD

FE summary

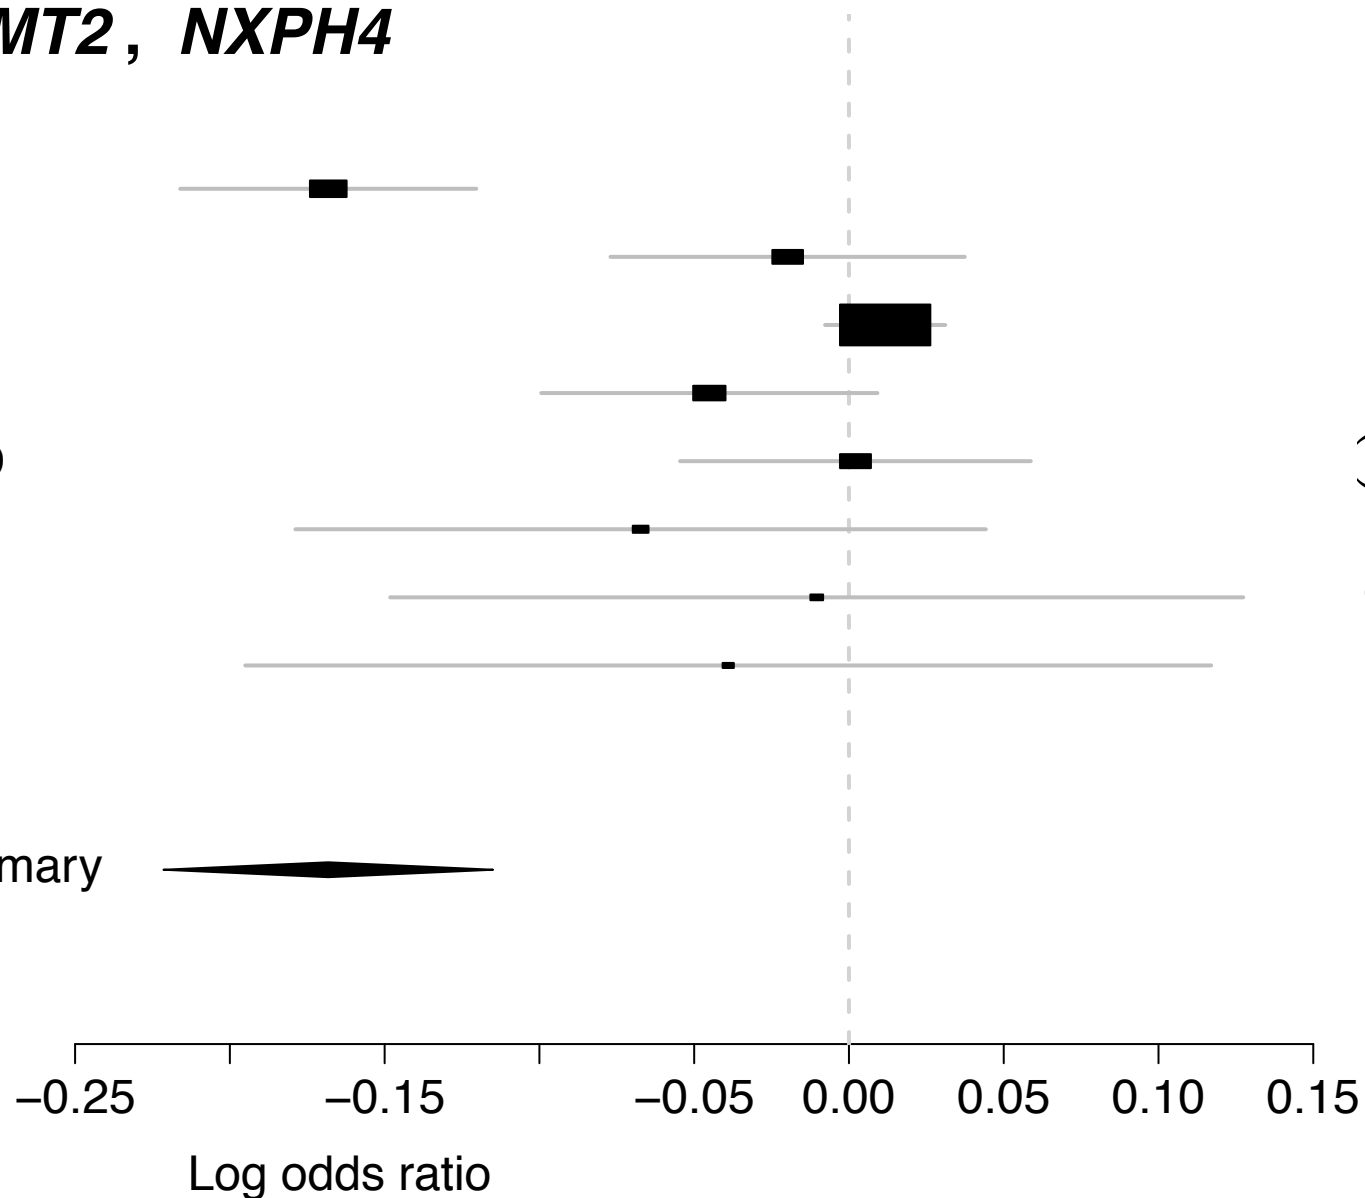

## PM-Plot

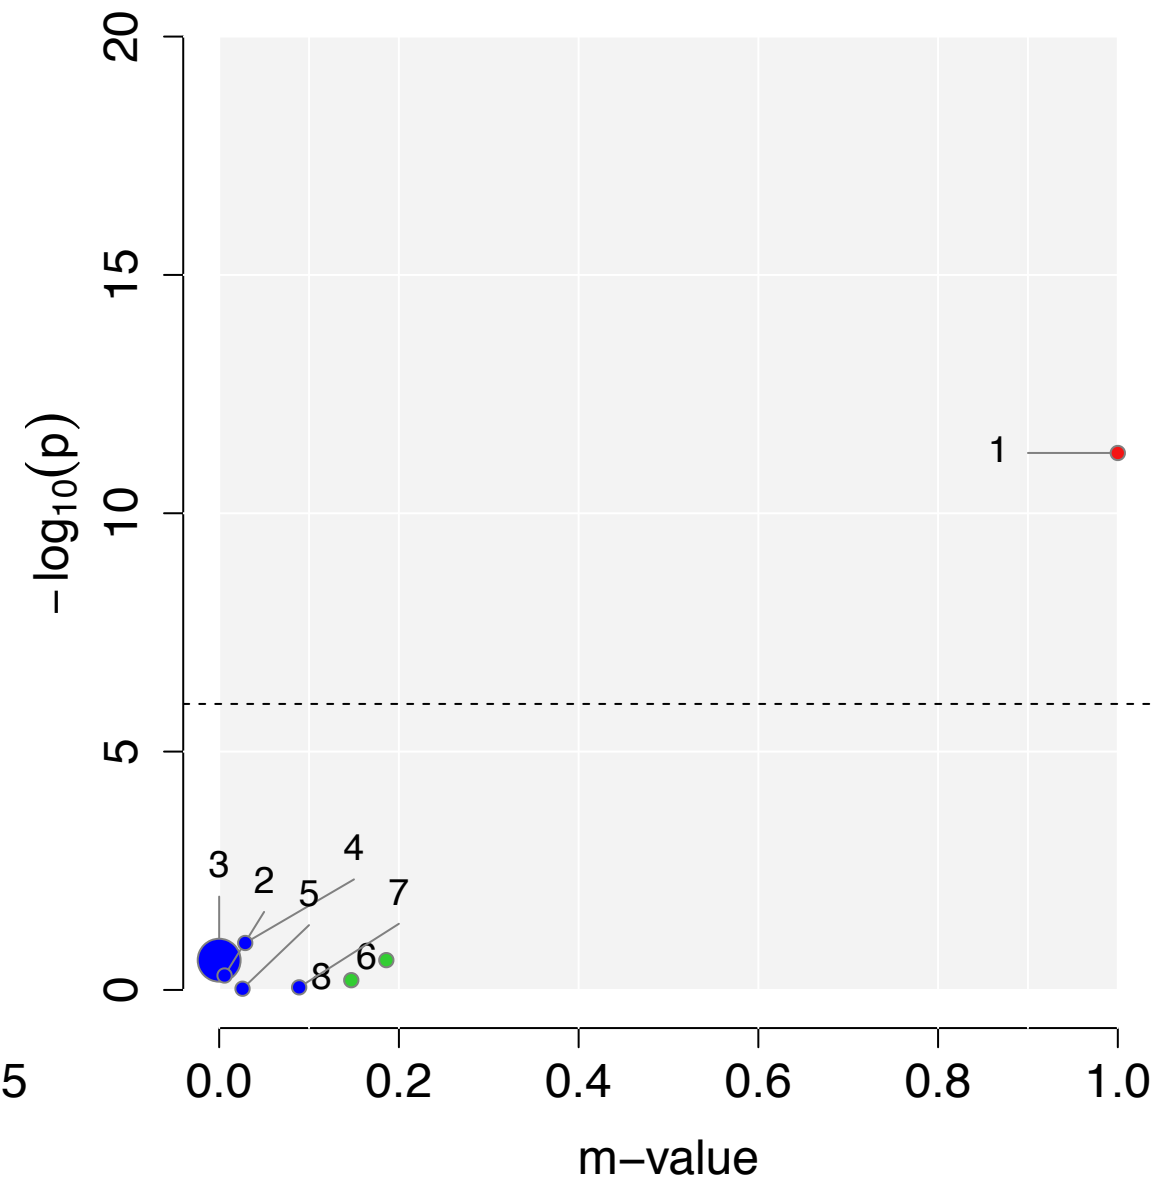

# rs12894153 (Meta $P = 2.32 \times 10^{-8}$ )

Gene : *RTN1*

## GWAS P-value

- 4.01 x 10<sup>-6</sup> ● 1.SCZ
- 0.5344 ● 2.BIP
- 7.05 x 10<sup>-7</sup> ● 3.MD
- 0.5838 ● 4.ASD
- 0.6471 ● 5.ADHD
- 0.3577 ● 6.TS
- 0.7296 ● 7.ANO
- 0.7001 ● 8.OCD

FE summary

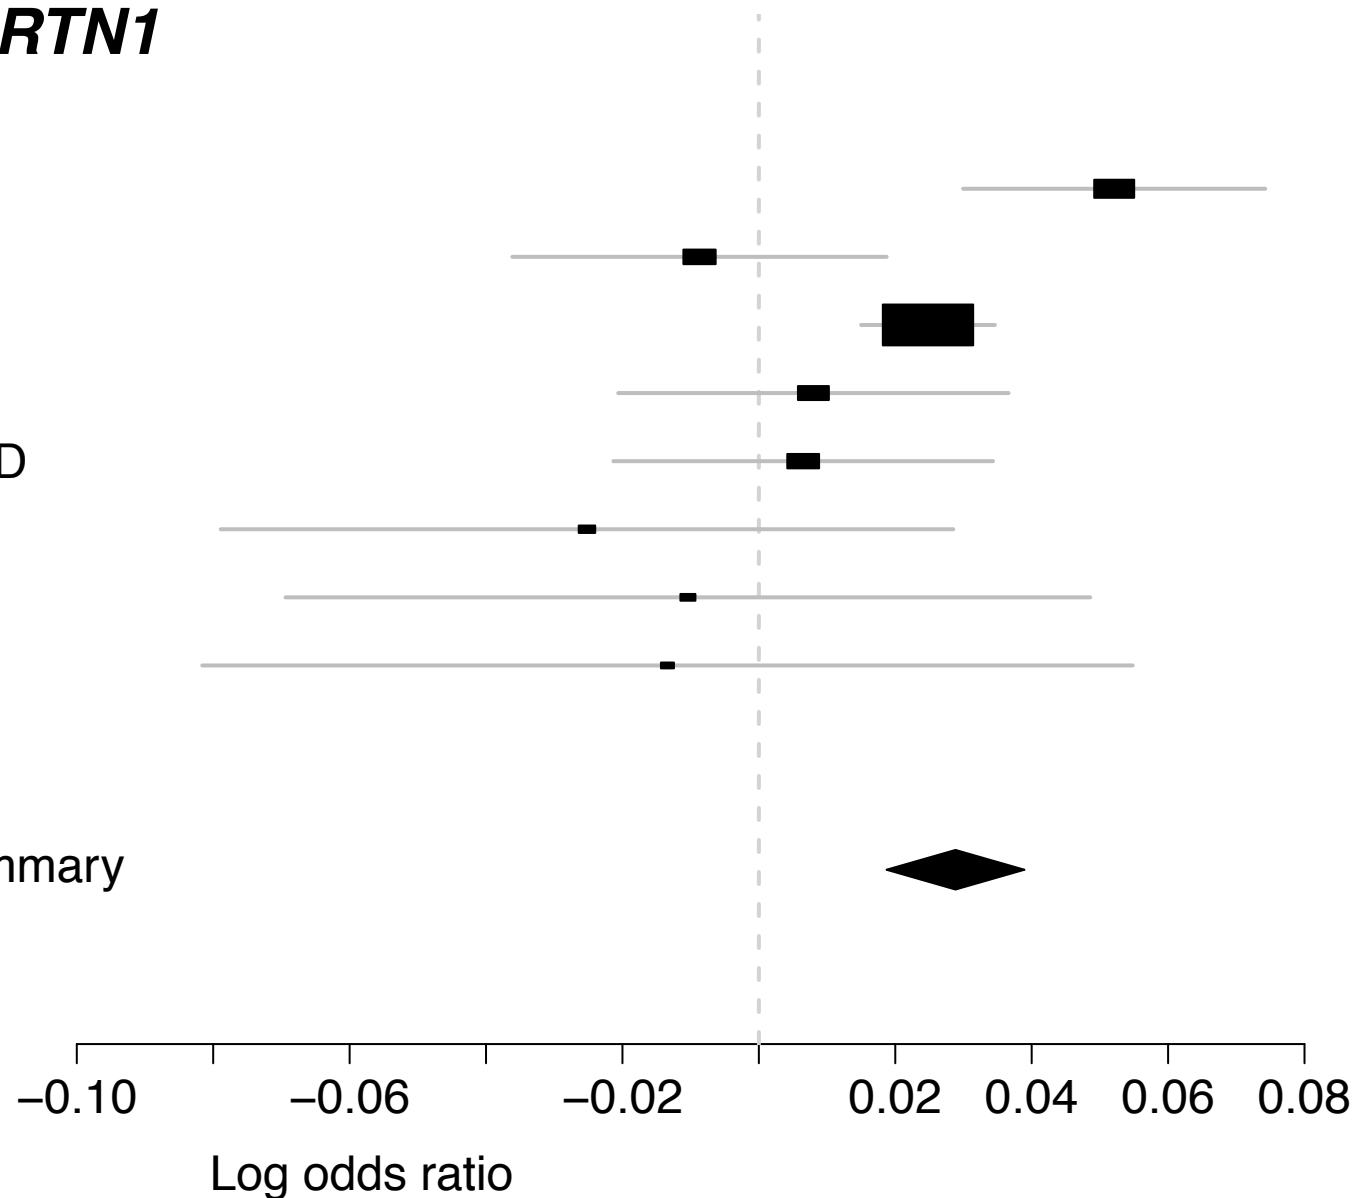

## PM-Plot

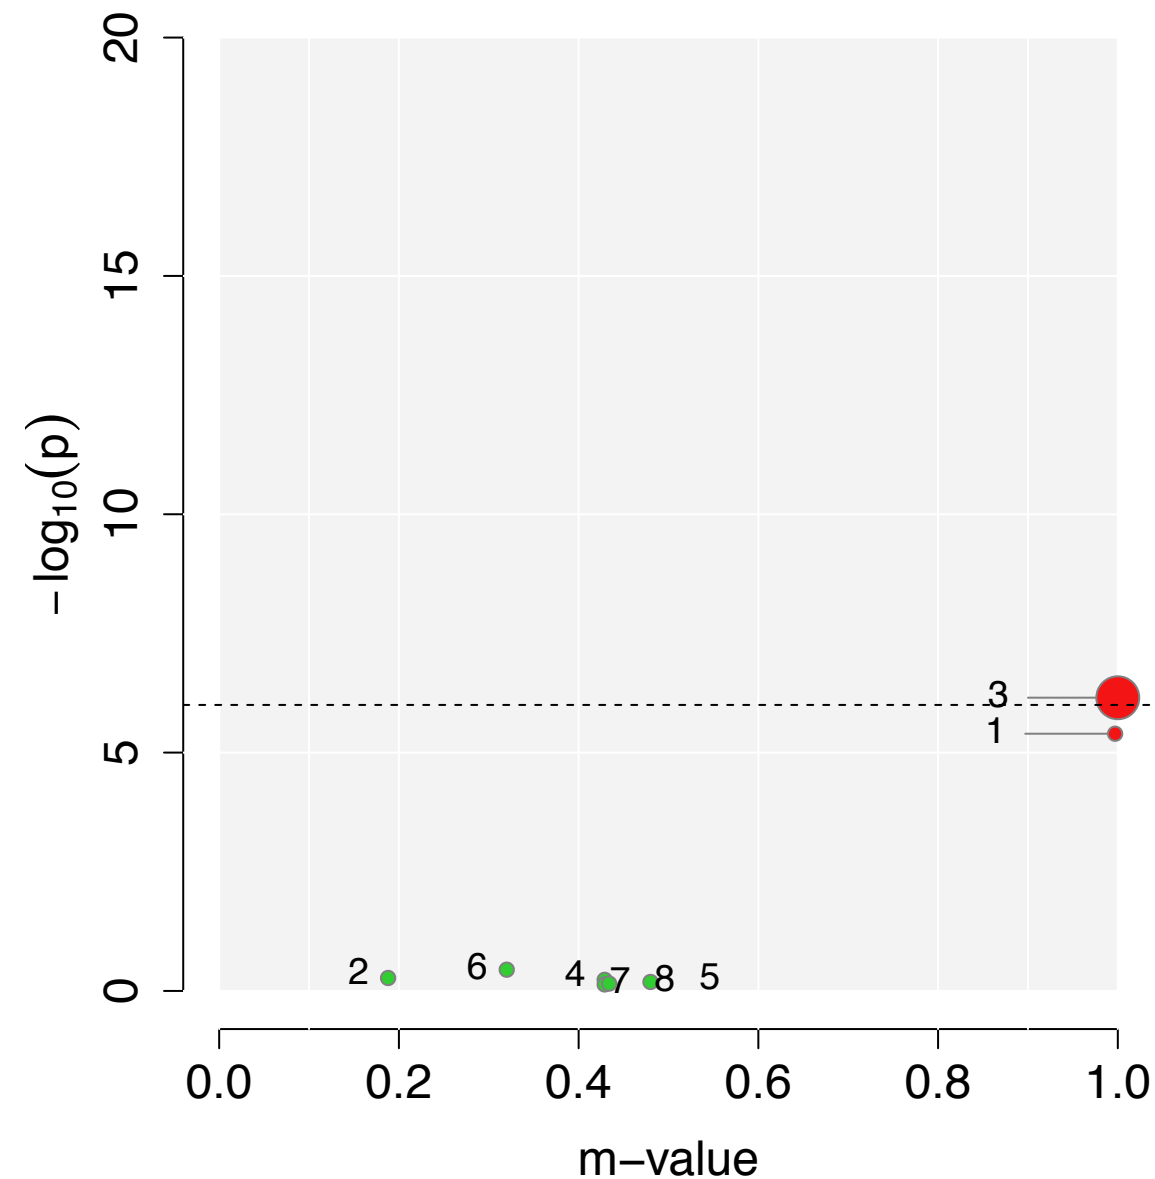

# rs12898460 (Meta $P = 4.36 \times 10^{-8}$ )

Gene : *C15orf53*

## GWAS P-value

- 0.1495 ● 1.SCZ
- $6.26 \times 10^{-8}$  ● 2.BIP
- 0.3659 ● 3.MD
- 0.6099 ● 4.ASD
- 0.0058 ● 5.ADHD
- 0.0011 ● 6.TS
- 0.1853 ● 7.ANO
- 0.8857 ● 8.OCD

FE summary

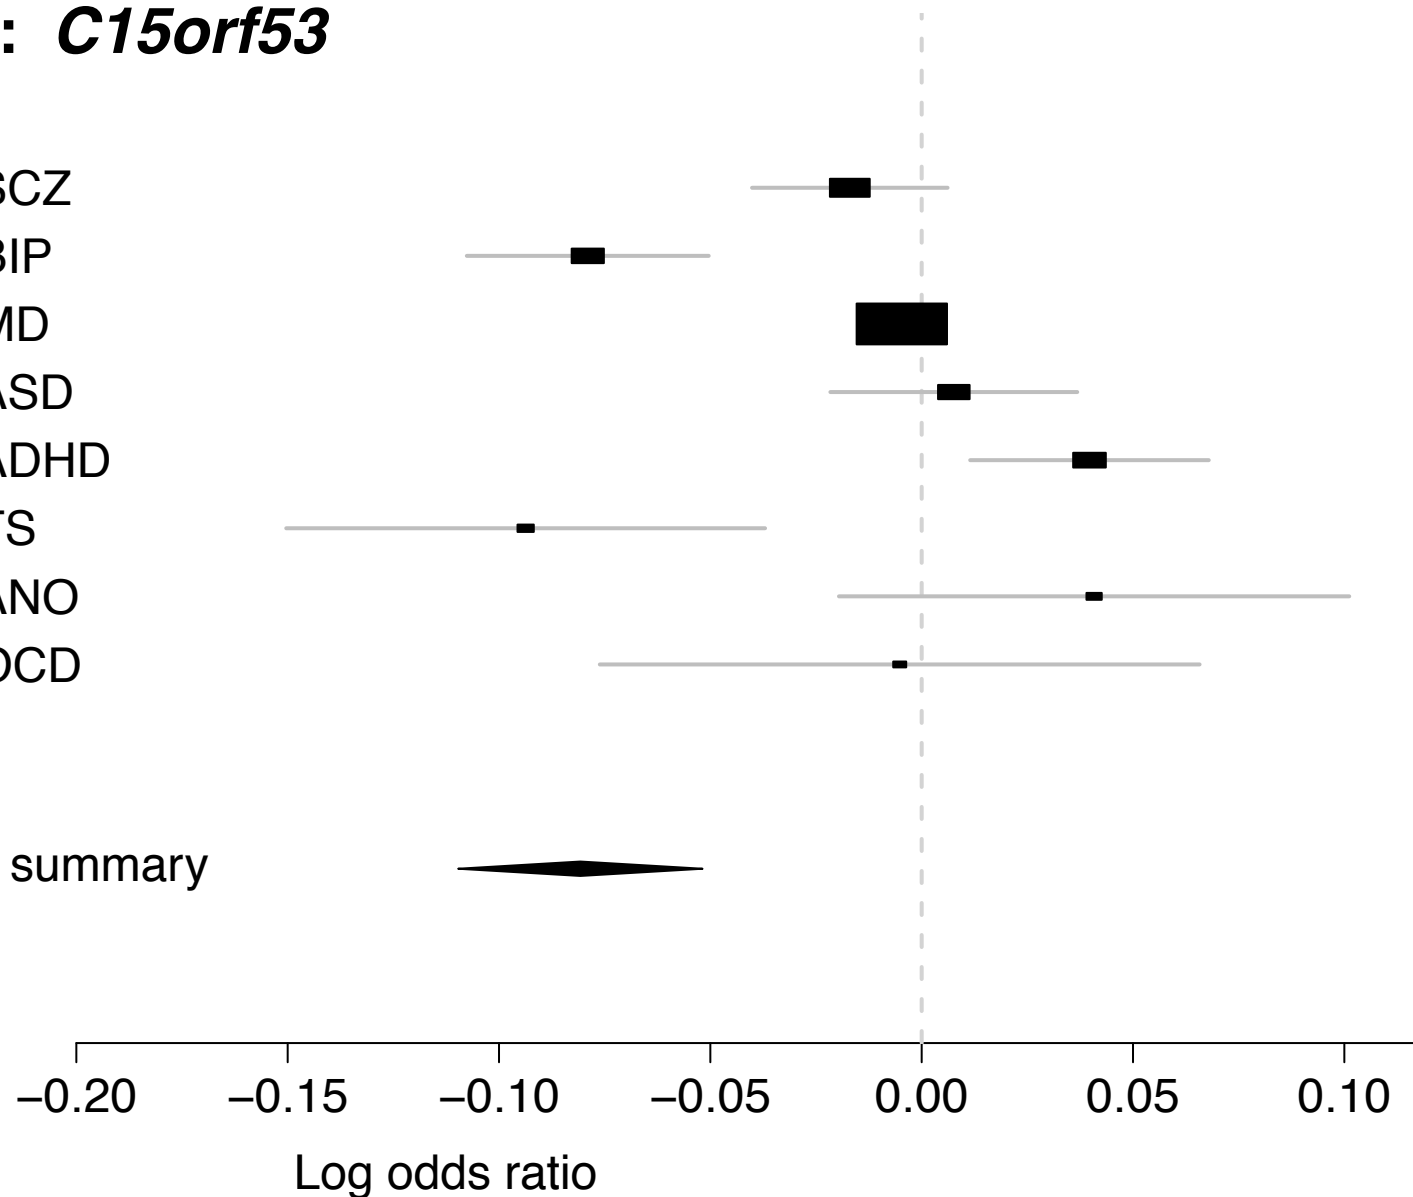

## PM-Plot

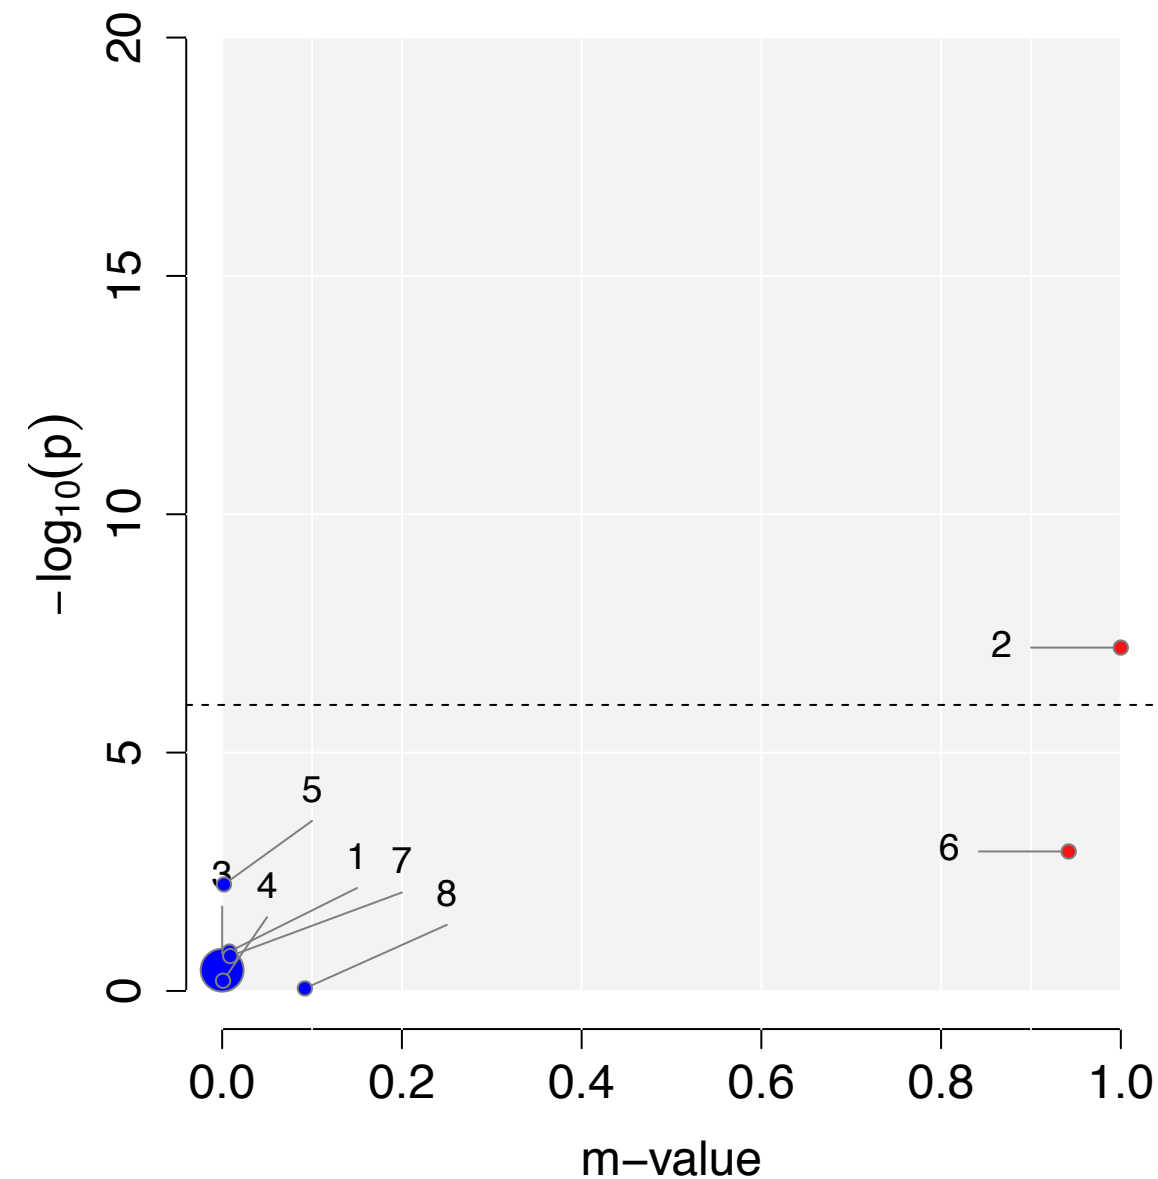

# rs12958048 (Meta $P = 1.04 \times 10^{-12}$ )

Gene : *TCF4*

## GWAS P-value

- 2.60 x 10<sup>-5</sup> ● 1.SCZ
- 0.0440 ● 2.BIP
- 3.40 x 10<sup>-11</sup> ● 3.MD
- 0.7766 ● 4.ASD
- 0.3520 ● 5.ADHD
- 0.6021 ● 6.TS
- 0.3509 ● 7.ANO
- 0.8370 ● 8.OCD

FE summary

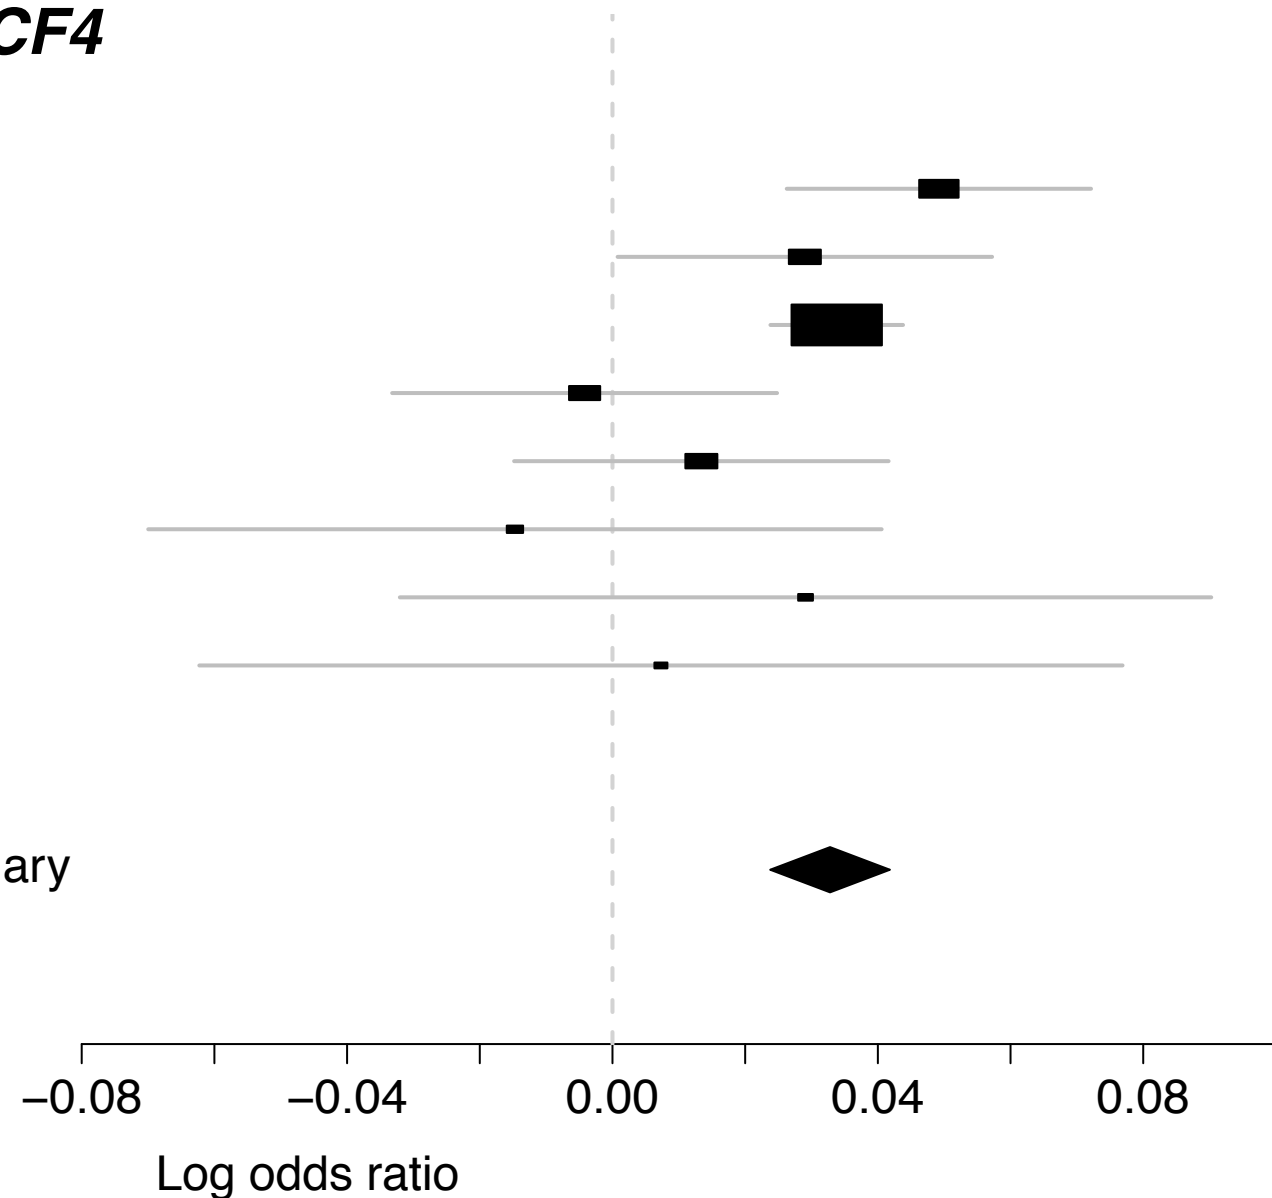

## PM-Plot

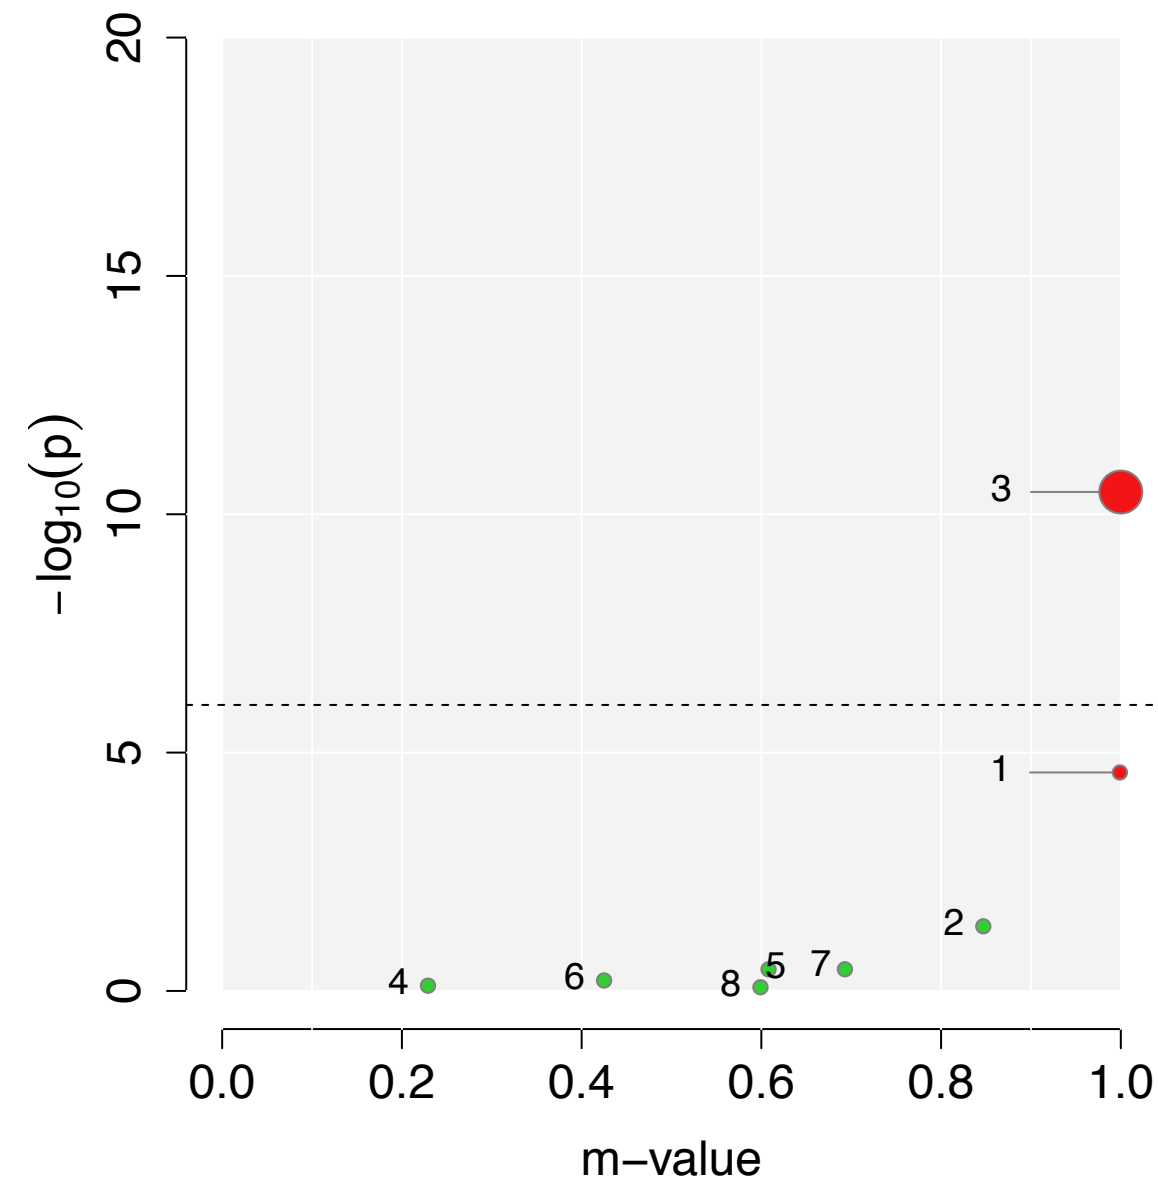

# rs13217619 (Meta $P = 1.04 \times 10^{-27}$ )

Gene : **ZSCAN31** , **ZKSCAN3**

## GWAS P-value

- 1.91 x 10<sup>-29</sup> ● 1.SCZ
- 9.76 x 10<sup>-5</sup> ● 2.BIP
- 5.71 x 10<sup>-7</sup> ● 3.MD
- 0.1541 ● 4.ASD
- 0.2659 ● 5.ADHD
- 0.6853 ● 6.TS
- 0.6070 ● 7.ANO
- 0.0255 ● 8.OCD

FE summary

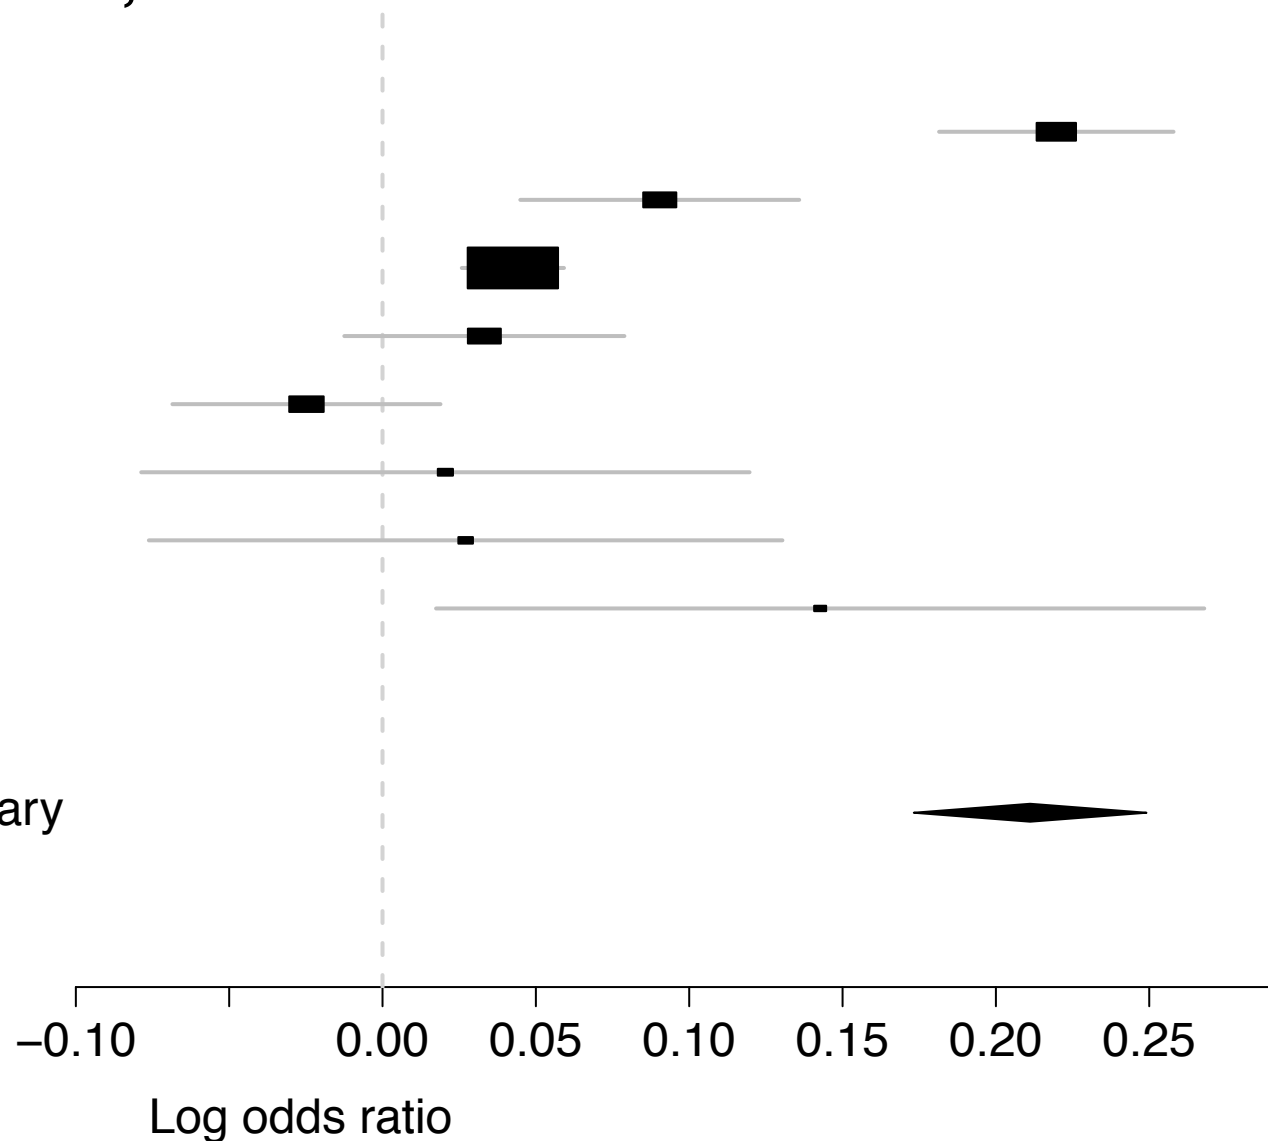

## PM-Plot

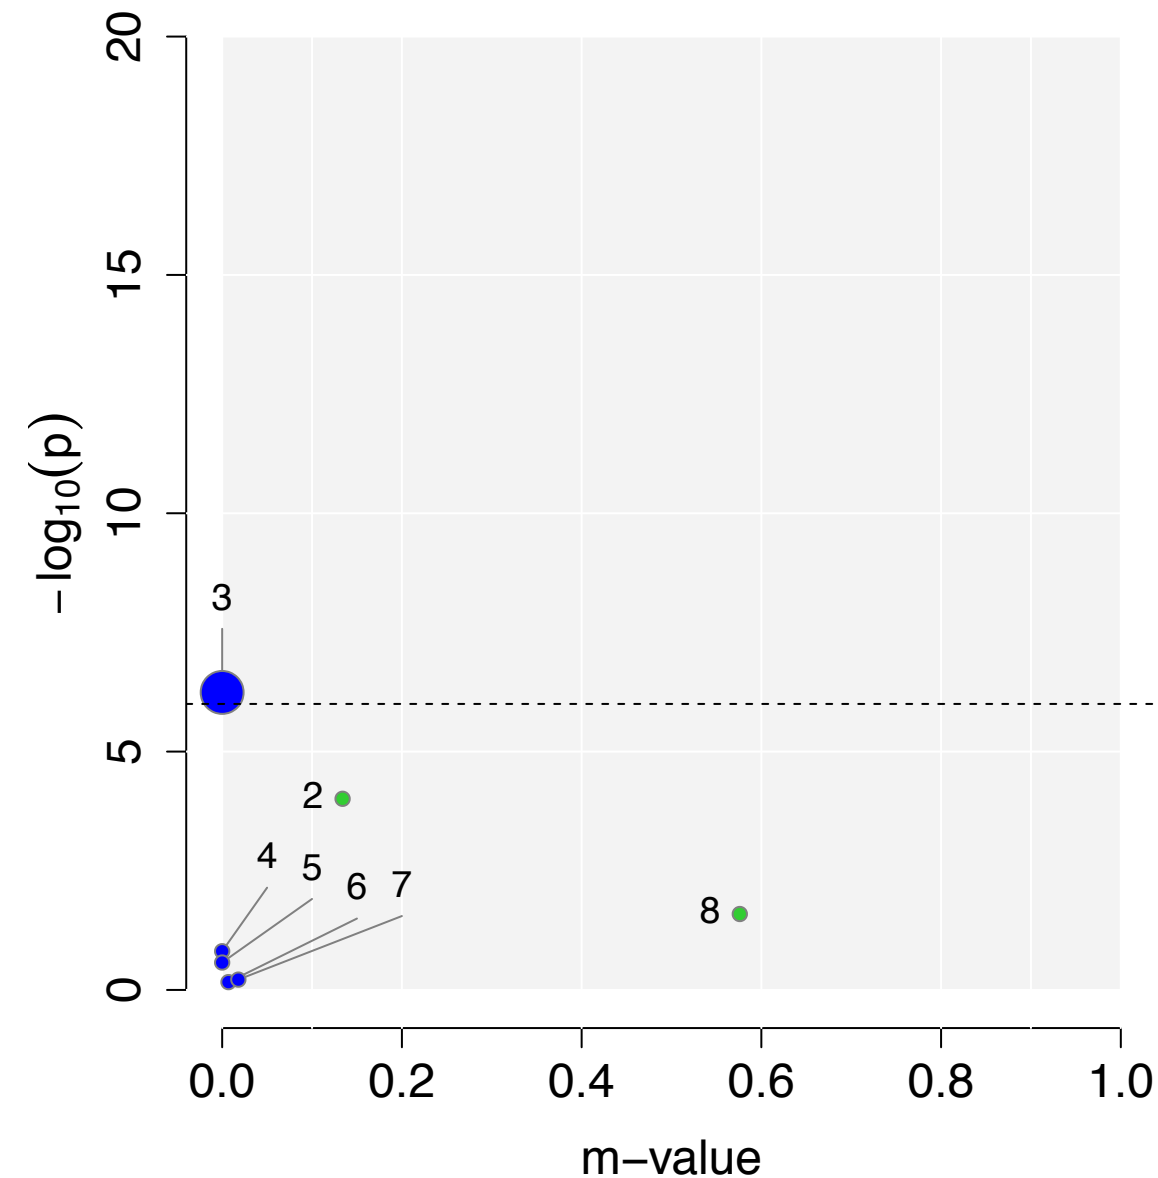

# rs13240464 (Meta $P = 5.55 \times 10^{-11}$ )

Gene : *IMMP2L*

## GWAS P-value

- 3.47 x 10<sup>NA</sup> ● 1.SCZ
- 0.0782 ● 2.BIP
- 0.1525 ● 3.MD
- 0.7698 ● 4.ASD
- 0.1041 ● 5.ADHD
- 0.0265 ● 6.TS
- 0.1340 ● 7.ANO
- 0.0814 ● 8.OCD

FE summary

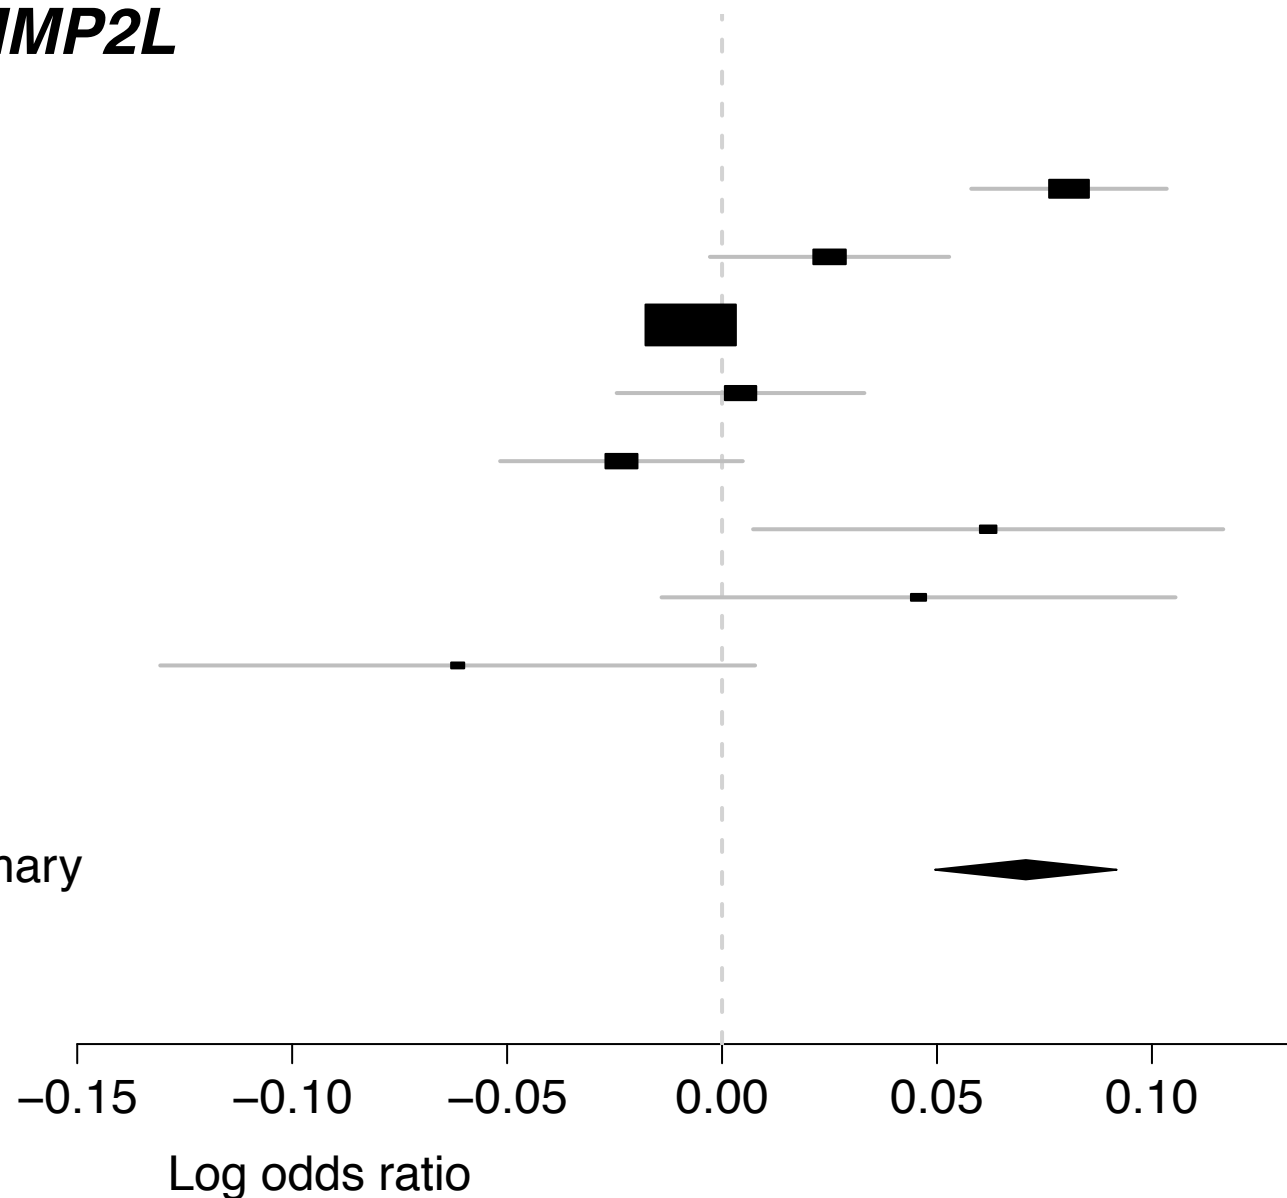

## PM-Plot

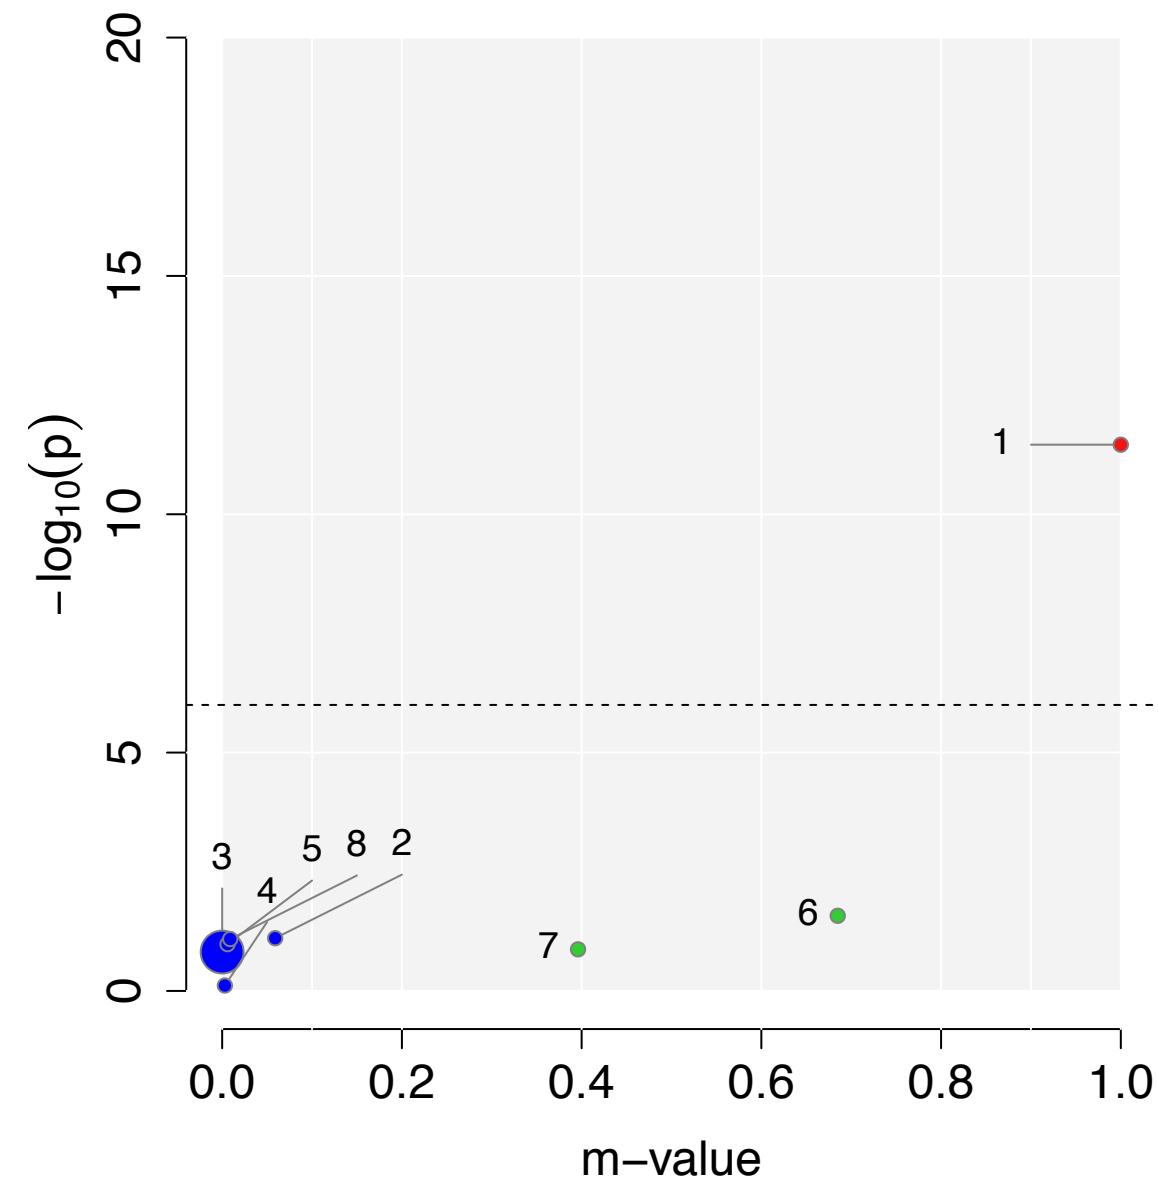

# rs28669119 (Meta $P = 1.64 \times 10^{-9}$ )

Gene : *MEF2C*

## GWAS P-value

- 1.38 x 10<sup>-6</sup> ● 1.SCZ
- 0.1446 ● 2.BIP
- 0.0196 ● 3.MD
- 0.3963 ● 4.ASD
- 3.09 x 10<sup>-6</sup> ● 5.ADHD
- 0.3651 ● 6.TS
- 0.4284 ● 7.ANO
- 0.0513 ● 8.OCD

FE summary

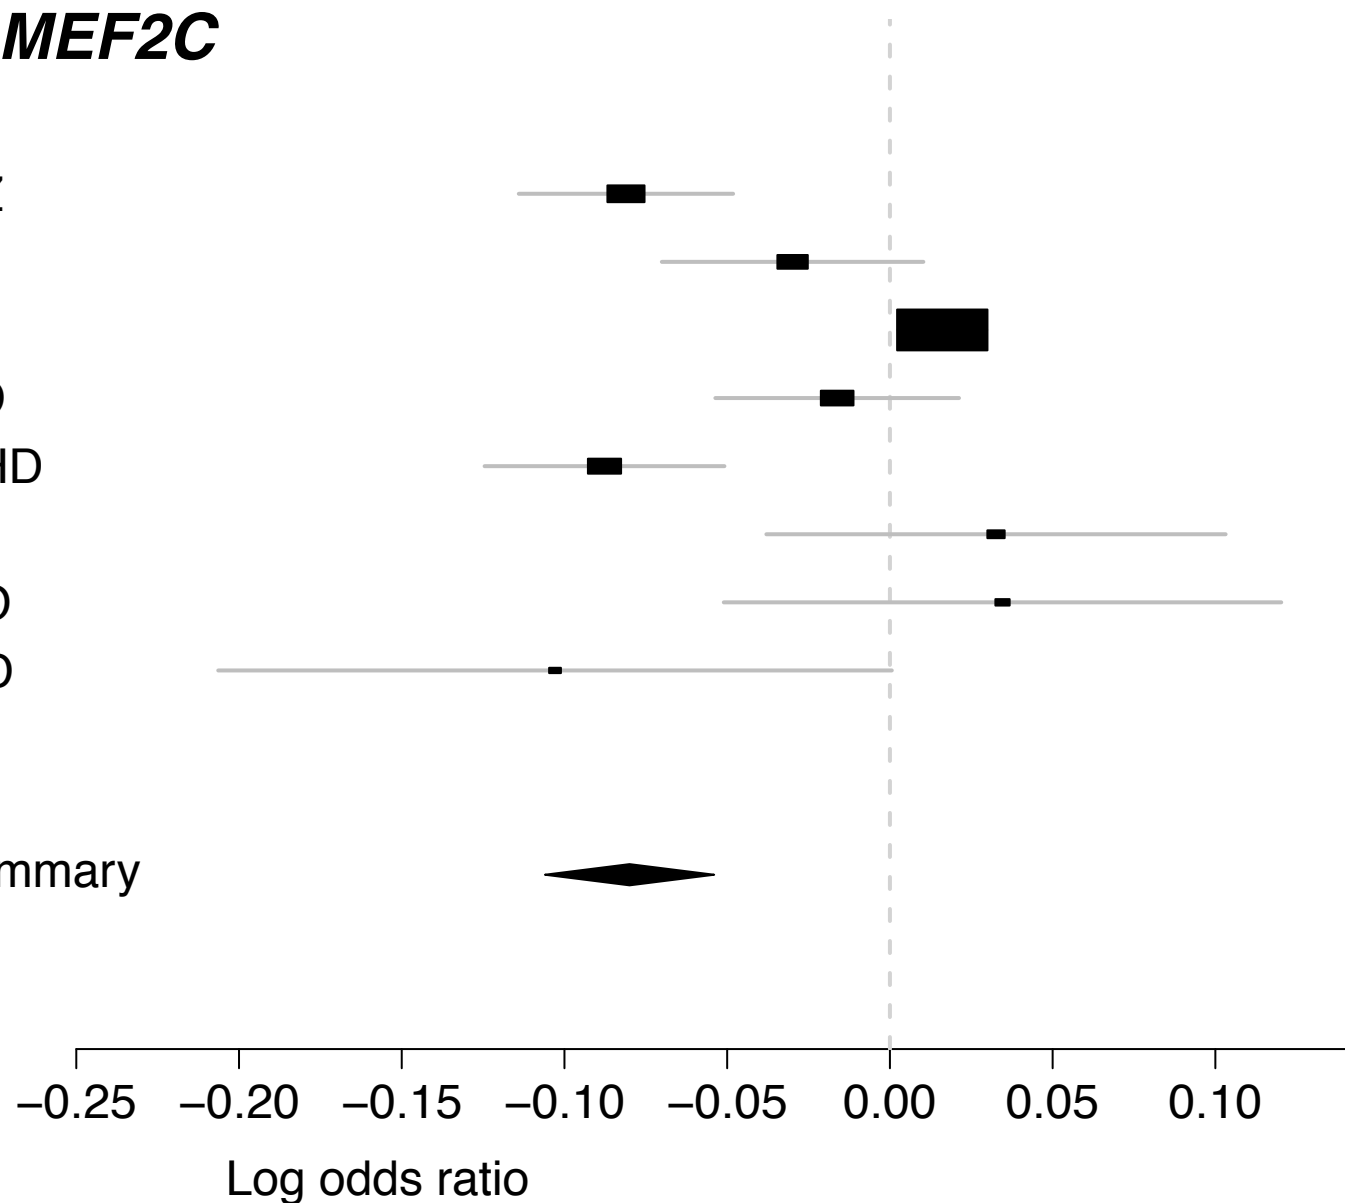

## PM-Plot

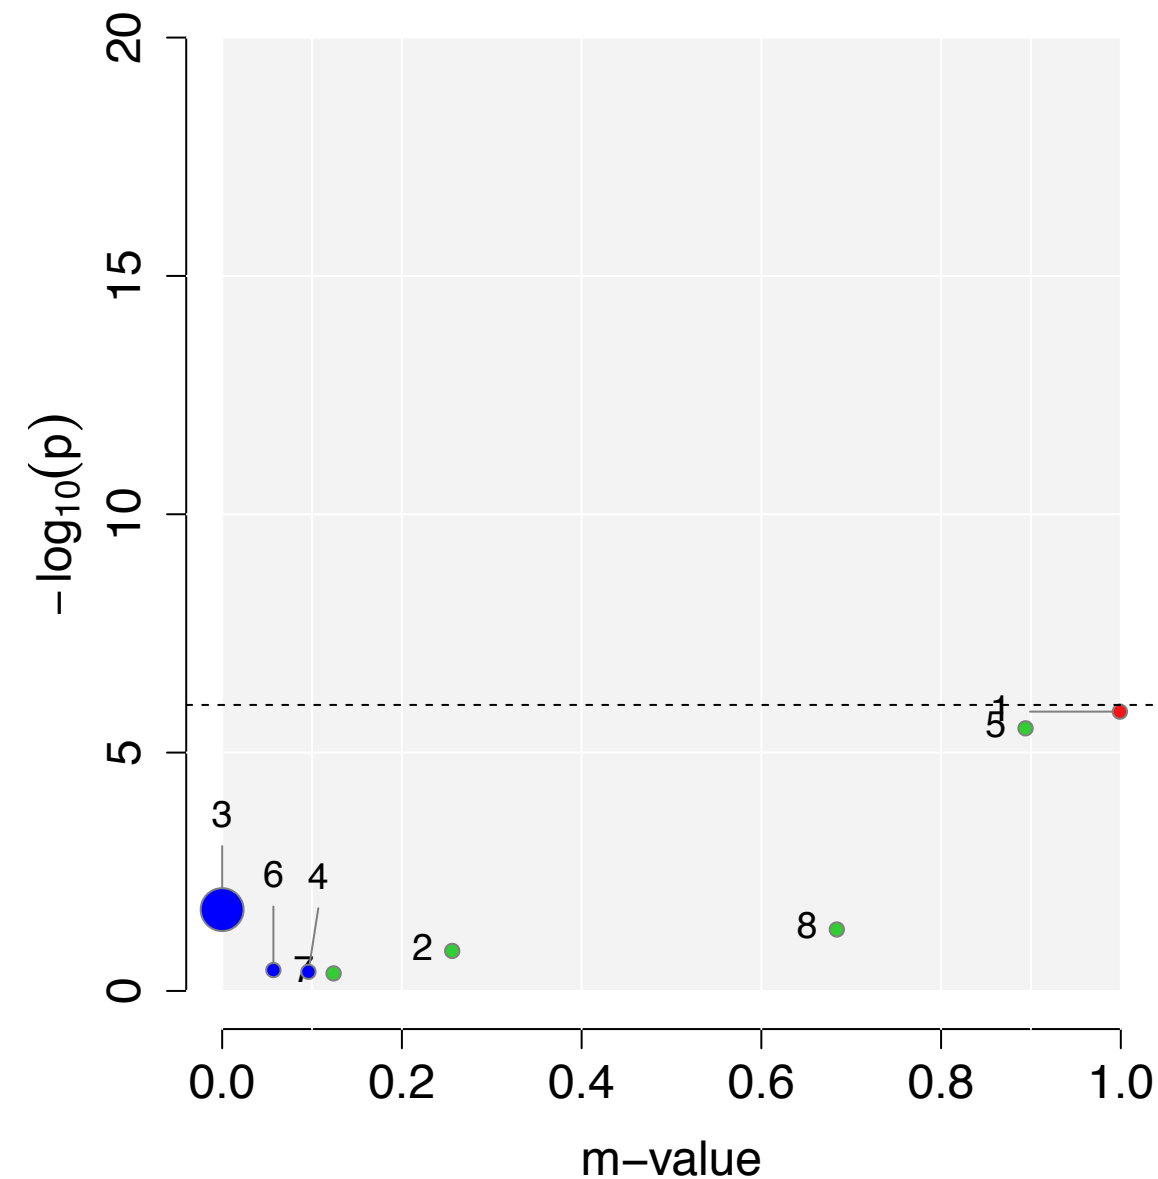



rs28681284 (Meta  $P = 5.59 \times 10^{-12}$ )

Gene : *CHRNA3*, *CHRNA4*

GWAS P-value

- 5.77 x 10<sup>-13</sup> ● 1.SCZ
- 0.0058 ● 2.BIP
- 0.4706 ● 3.MD
- 0.2740 ● 4.ASD
- 0.0287 ● 5.ADHD
- 0.0120 ● 6.TS
- 0.1801 ● 7.ANO
- 0.1634 ● 8.OCD

FE summary

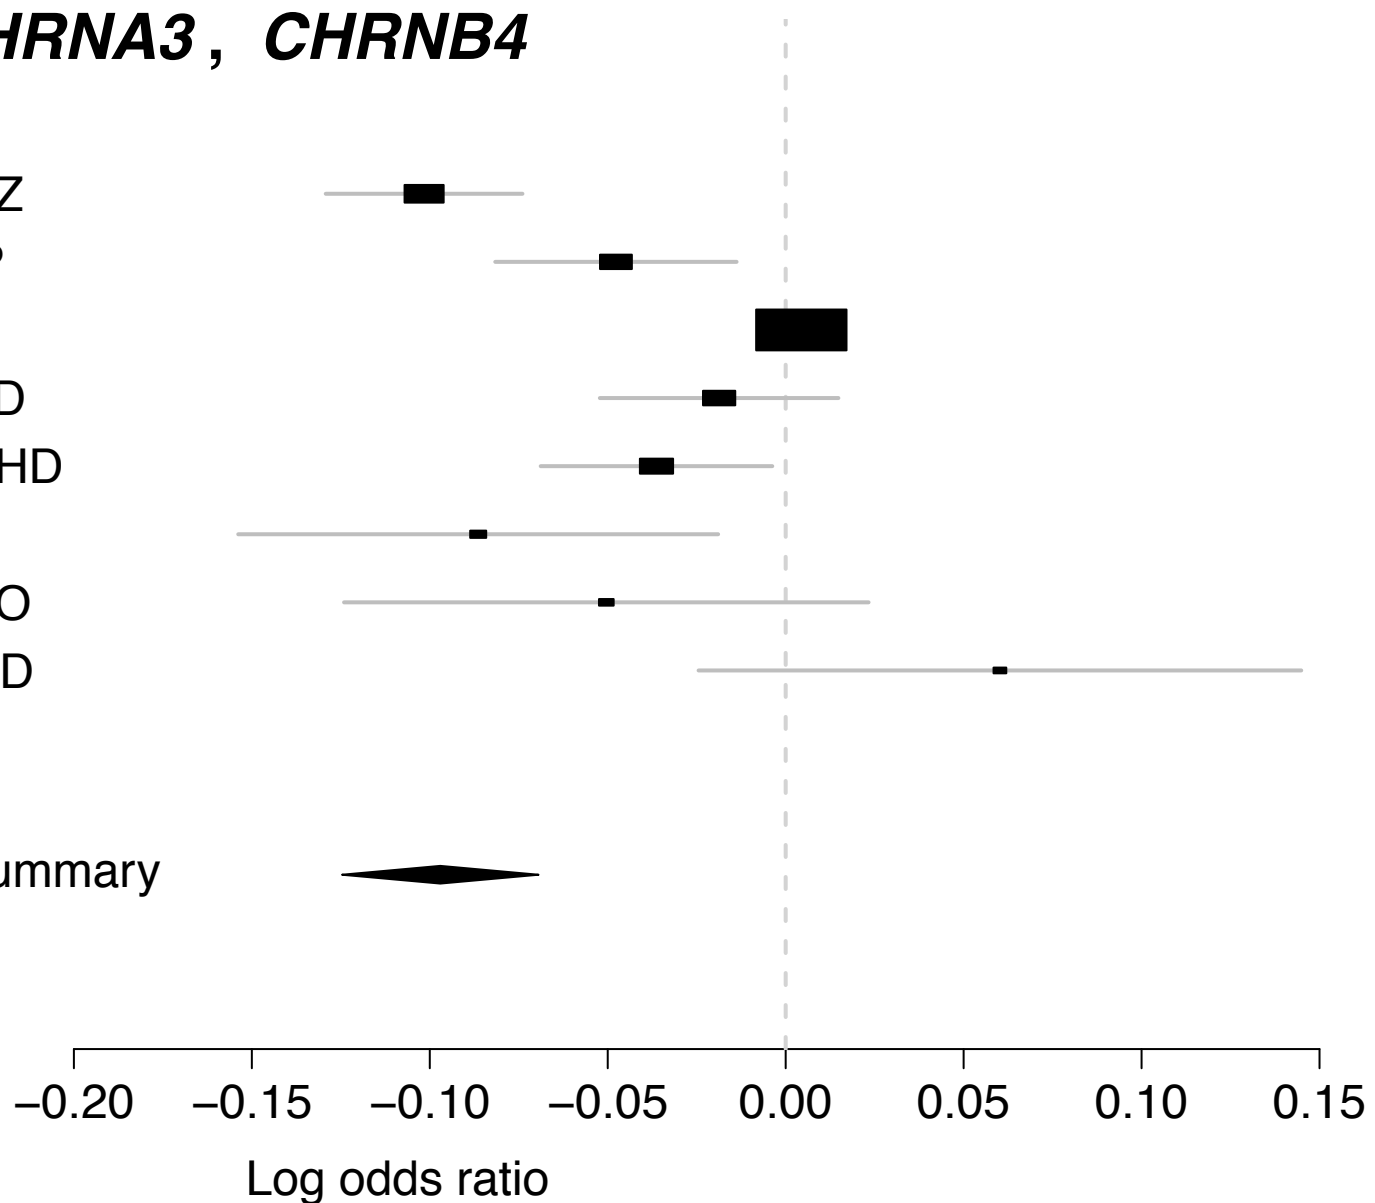

PM-Plot

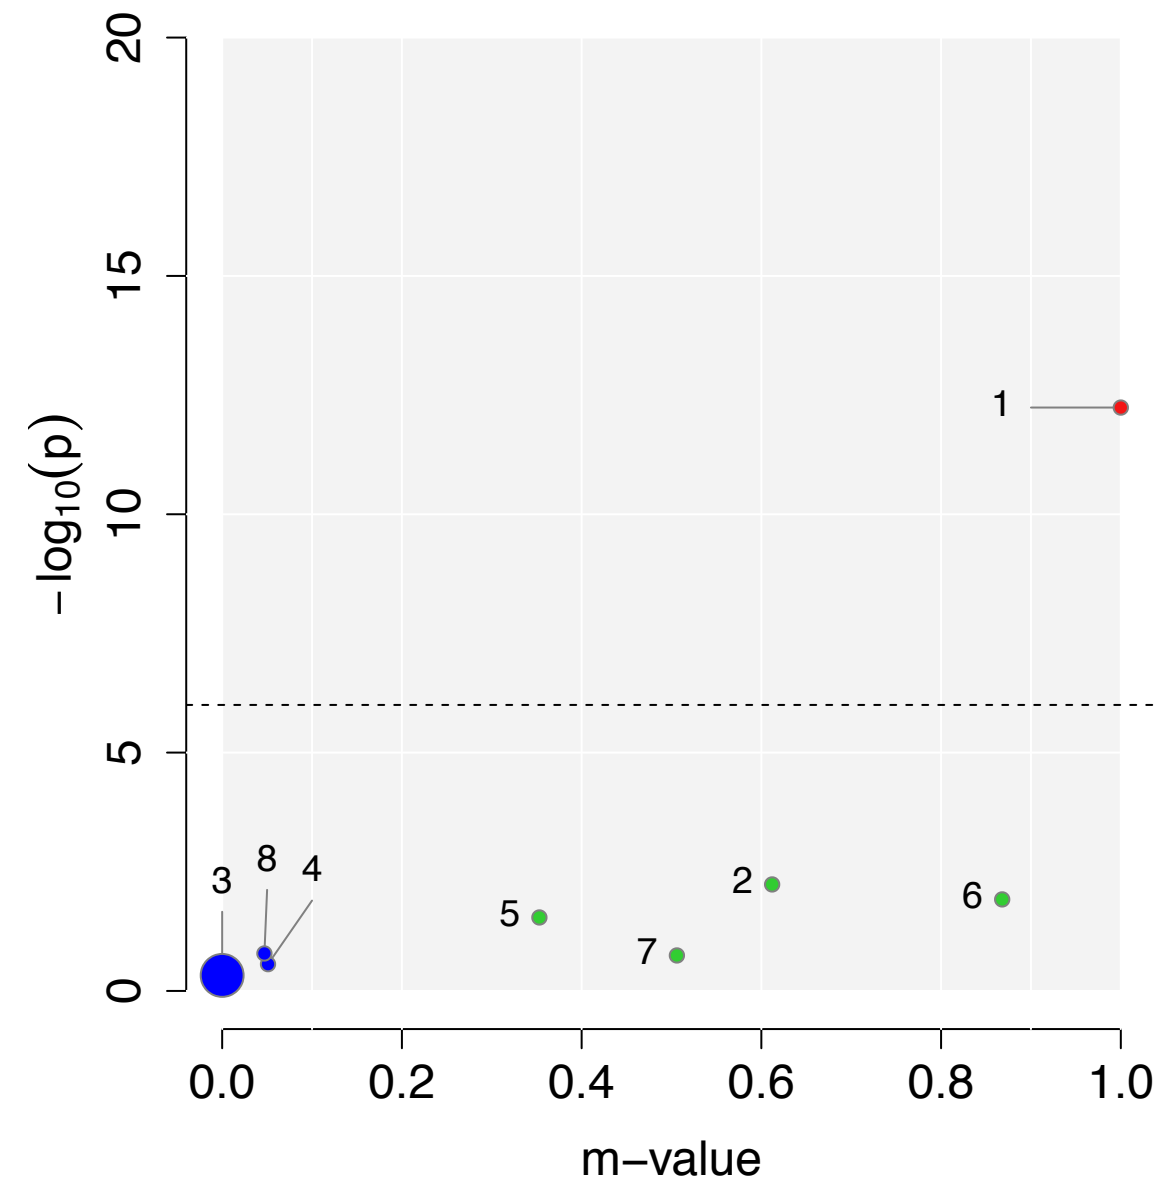

rs34215985 (Meta  $P = 3e-1 \times 10^{-10}$ )

Gene : *SLC30A9*, *DCAF4L1*

GWAS P-value

- 0.0588 ● 1.SCZ
- 0.2426 ● 2.BIP
- $3.21 \times 10^{-9}$  ● 3.MD
- 0.0009 ● 4.ASD
- 0.0221 ● 5.ADHD
- 0.1441 ● 6.TS
- 0.0614 ● 7.ANO
- 0.3126 ● 8.OCD

FE summary

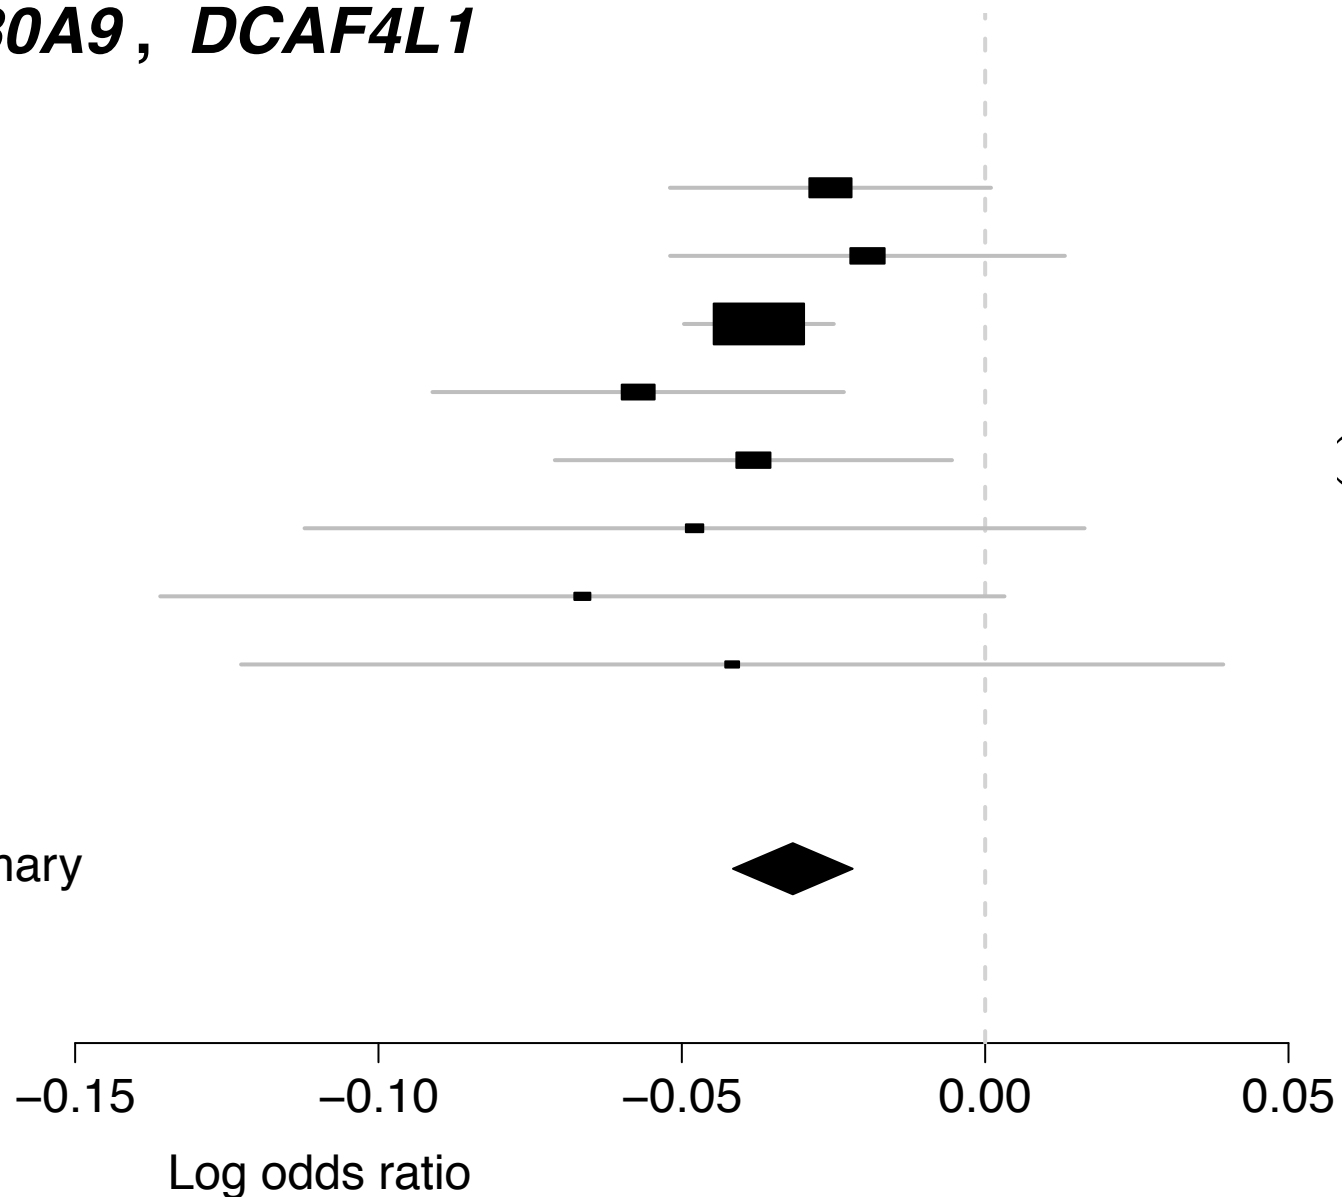

PM-Plot

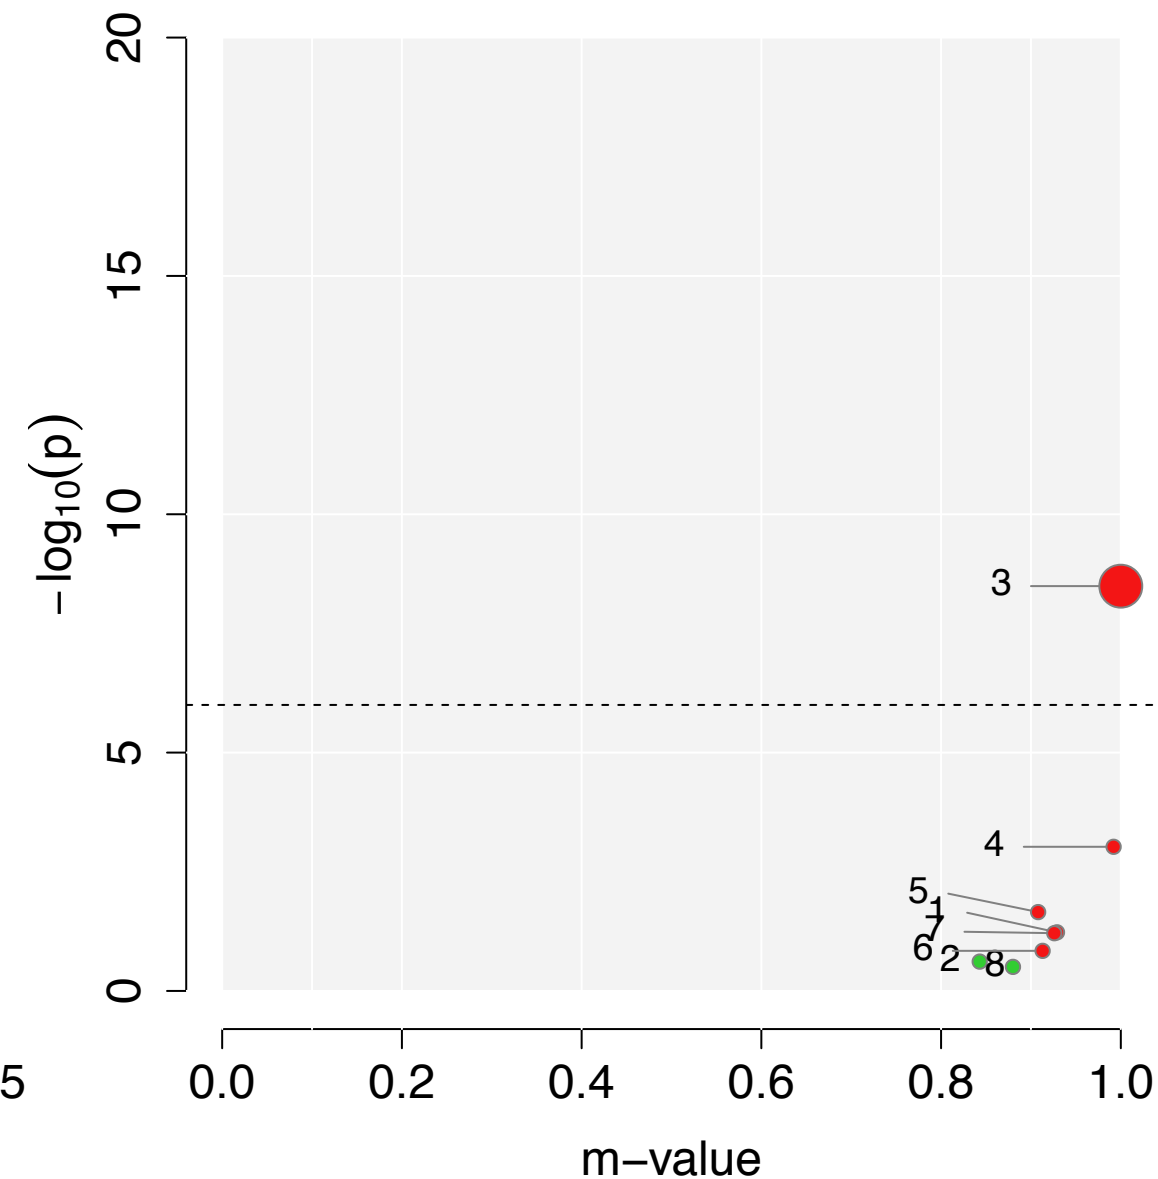

# rs35225200 (Meta $P = 1.11 \times 10^{-10}$ )

Gene : ***SLC39A8***

## GWAS P-value

- 9.83 x 10<sup>-3</sup> ● 1.SCZ
- 0.1250 ● 2.BIP
- 0.2774 ● 3.MD
- 0.1051 ● 4.ASD
- 0.9207 ● 5.ADHD
- 0.6680 ● 6.TS
- 0.4772 ● 7.ANO
- 0.2346 ● 8.OCD

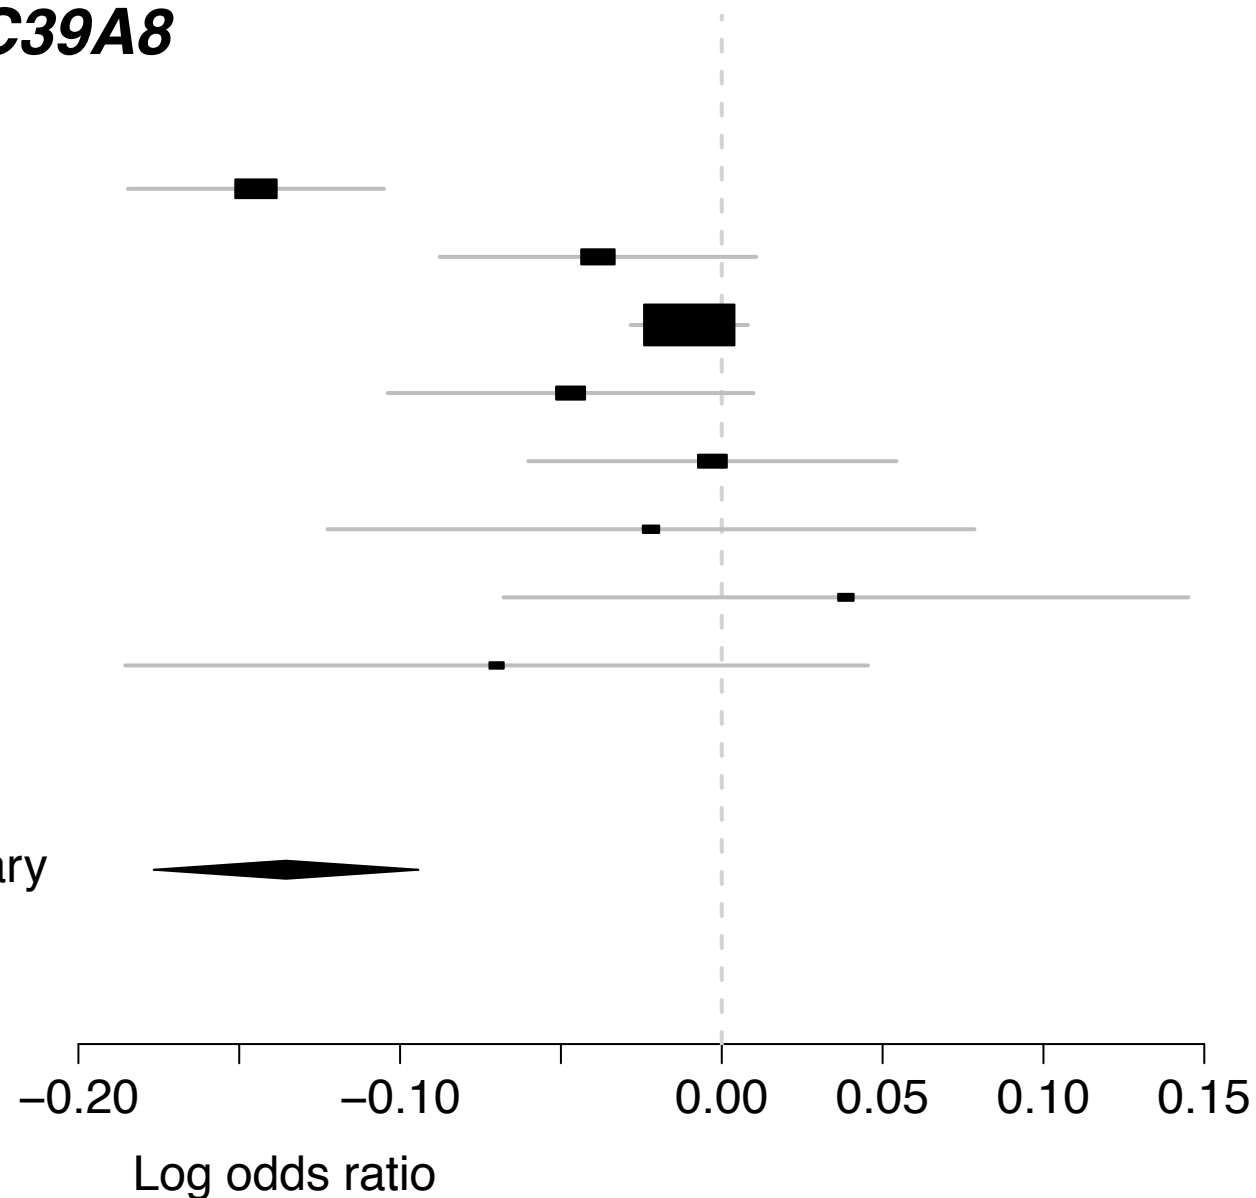

## PM-Plot

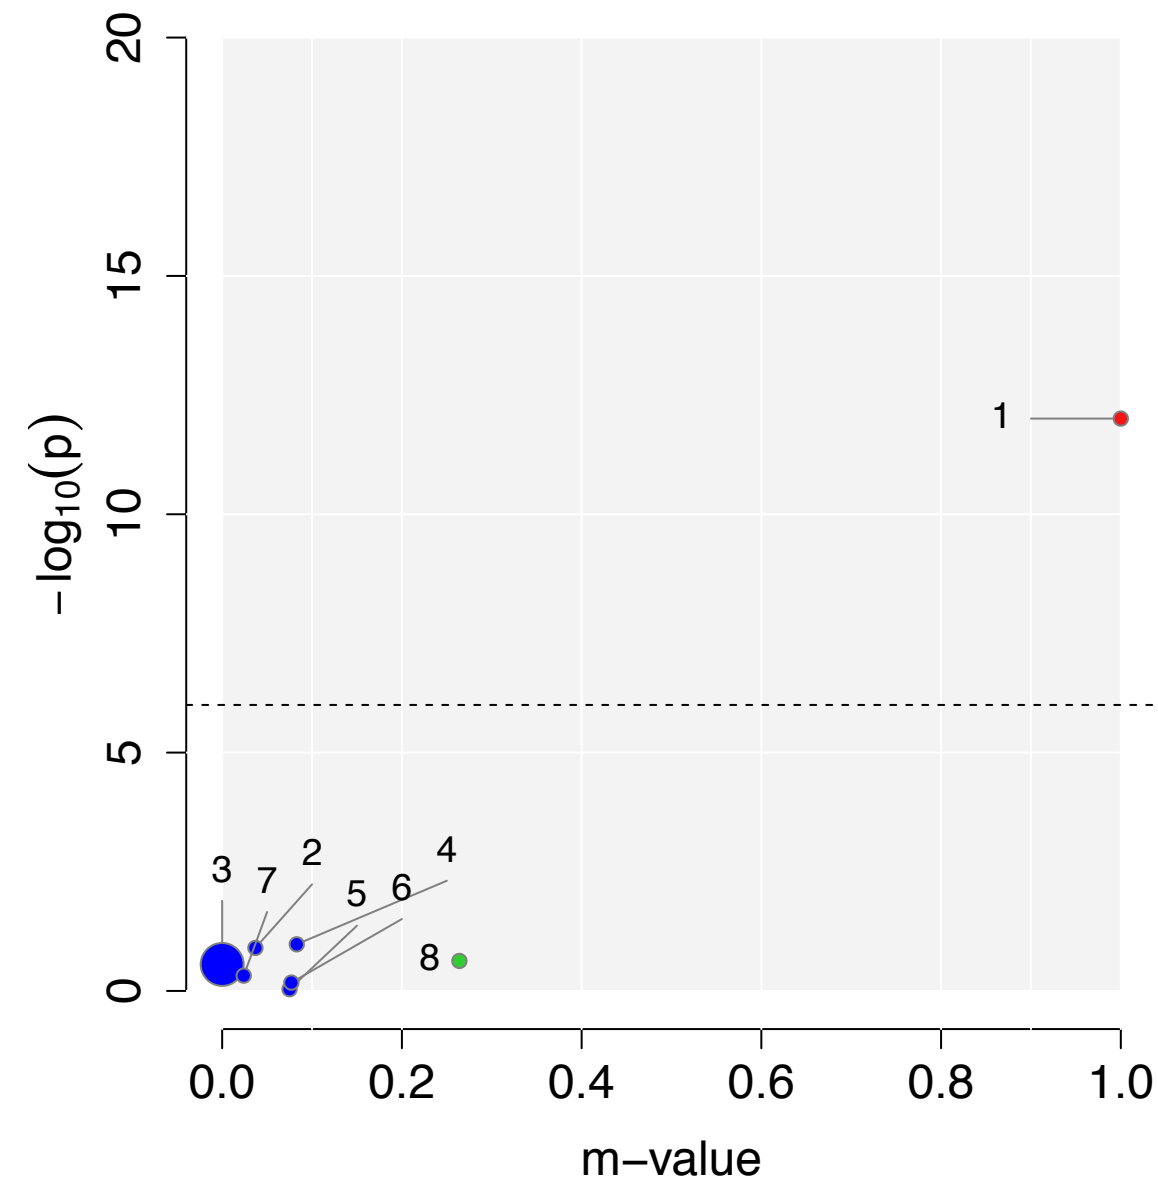

# rs35346733 (Meta $P = 7.71 \times 10^{-10}$ )

Gene : *CNTN4*

## GWAS P-value

- 2.47 x 10<sup>-10</sup> ● 1.SCZ
- 9.09 x 10<sup>-5</sup> ● 2.BIP
- 0.1652 ● 3.MD
- 0.7346 ● 4.ASD
- 0.4814 ● 5.ADHD
- 0.6099 ● 6.TS
- 0.6151 ● 7.ANO
- 0.2929 ● 8.OCD

FE summary

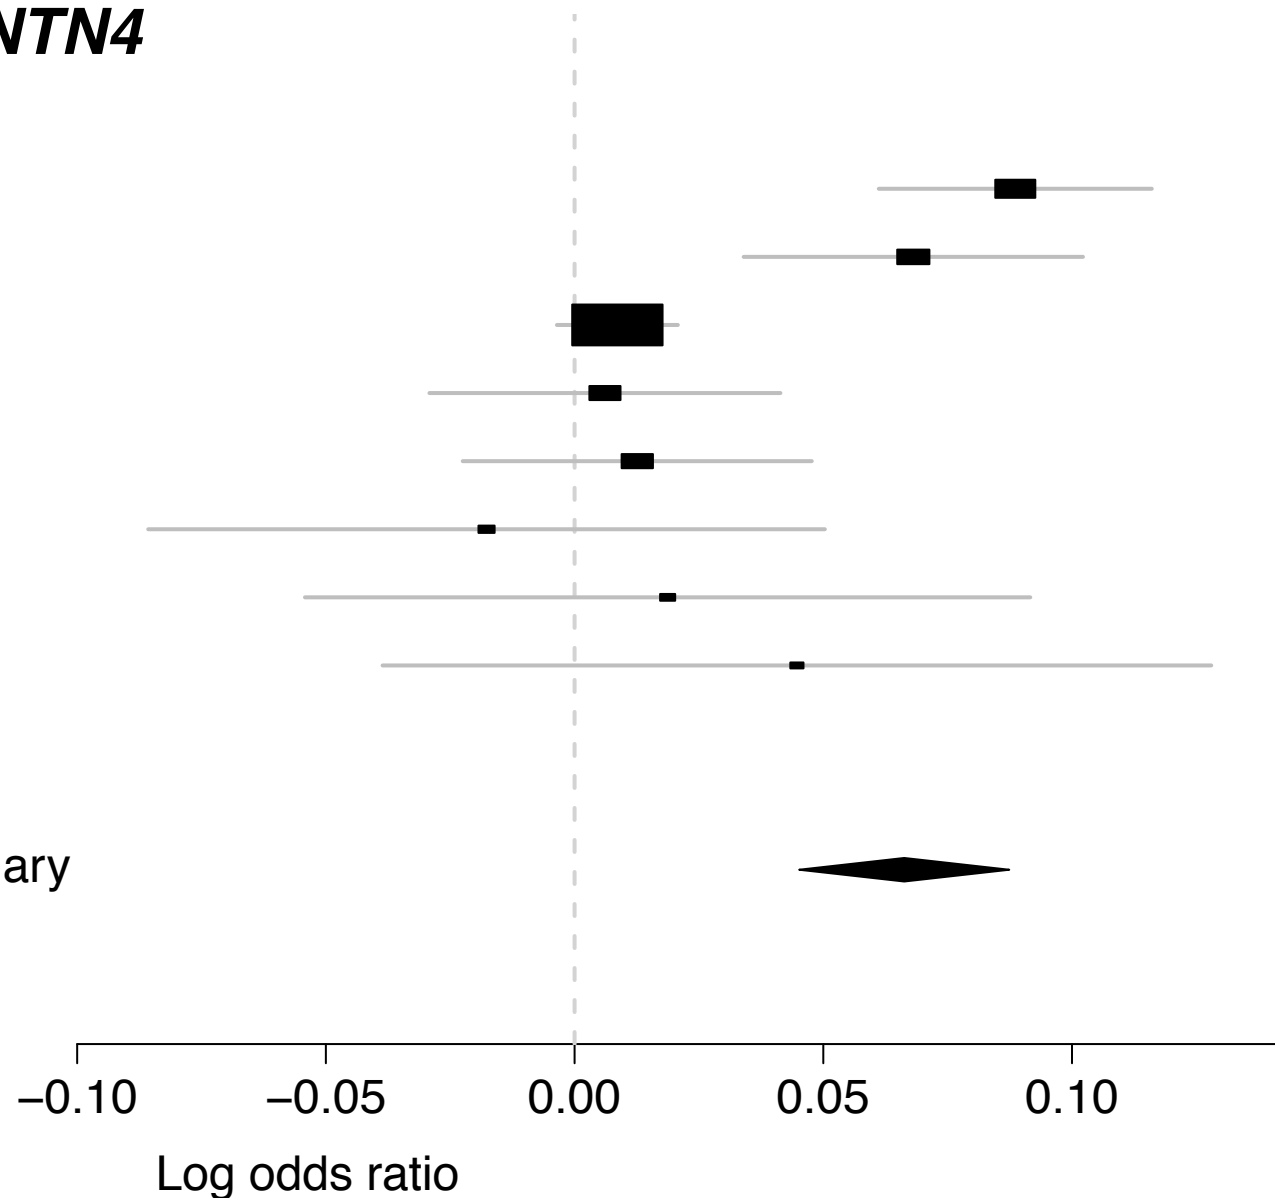

## PM-Plot

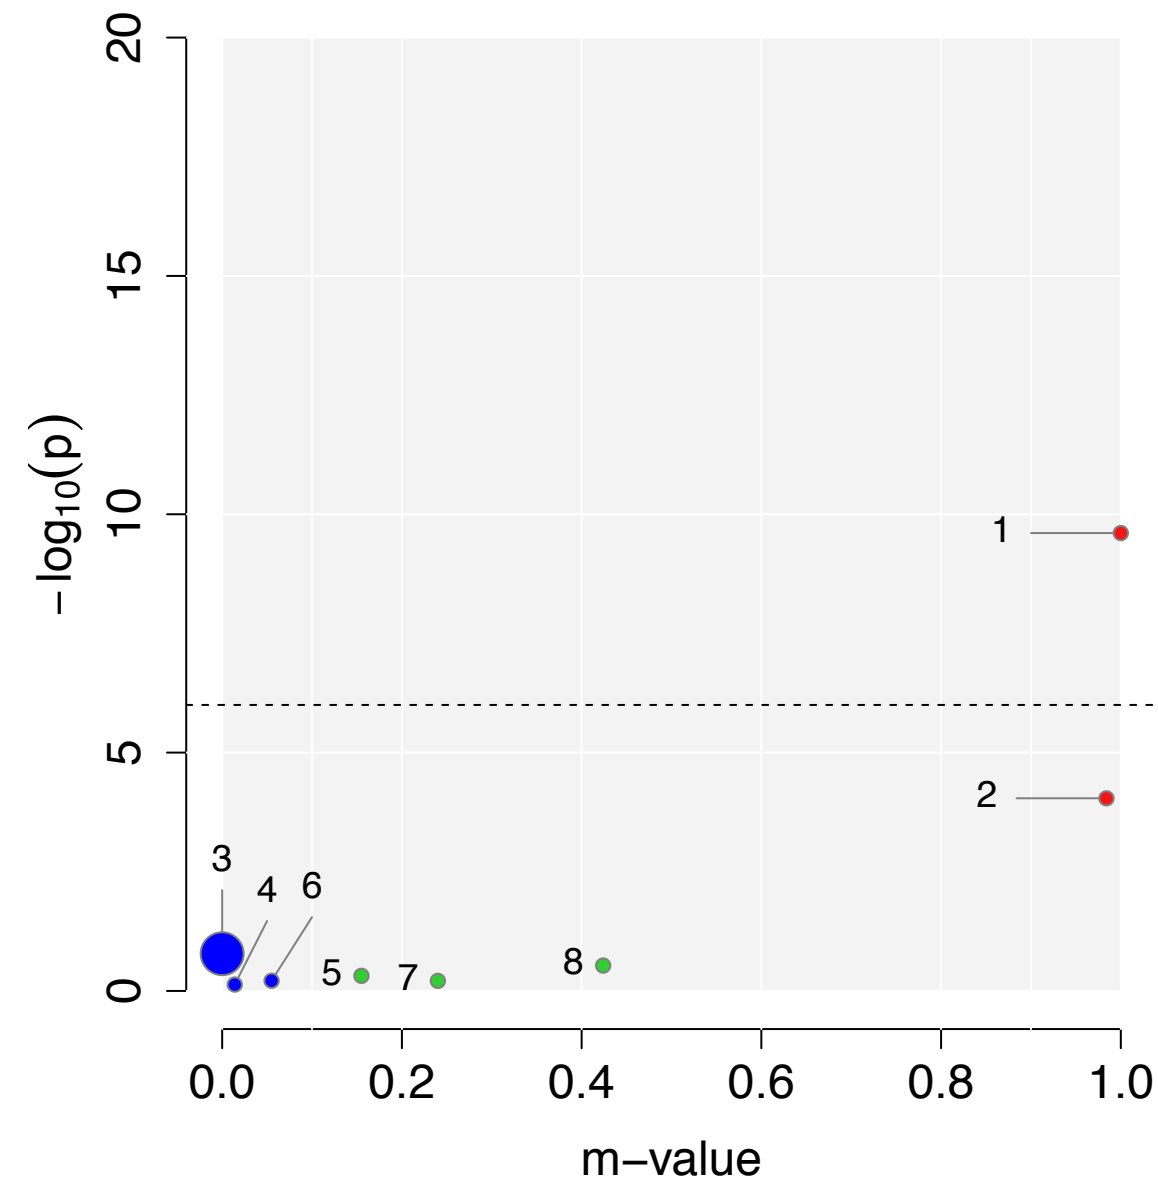

# rs35610290 (Meta $P = 1.54 \times 10^{-10}$ )

Gene : (>200kb)

## GWAS P-value

- 4.30 x 10<sup>-8</sup> ● 1.SCZ
- 3.62 x 10<sup>-7</sup> ● 2.BIP
- 0.2057 ● 3.MD
- 0.8646 ● 4.ASD
- 0.8898 ● 5.ADHD
- 0.7563 ● 6.TS
- 0.5839 ● 7.ANO
- 0.0436 ● 8.OCD

FE summary

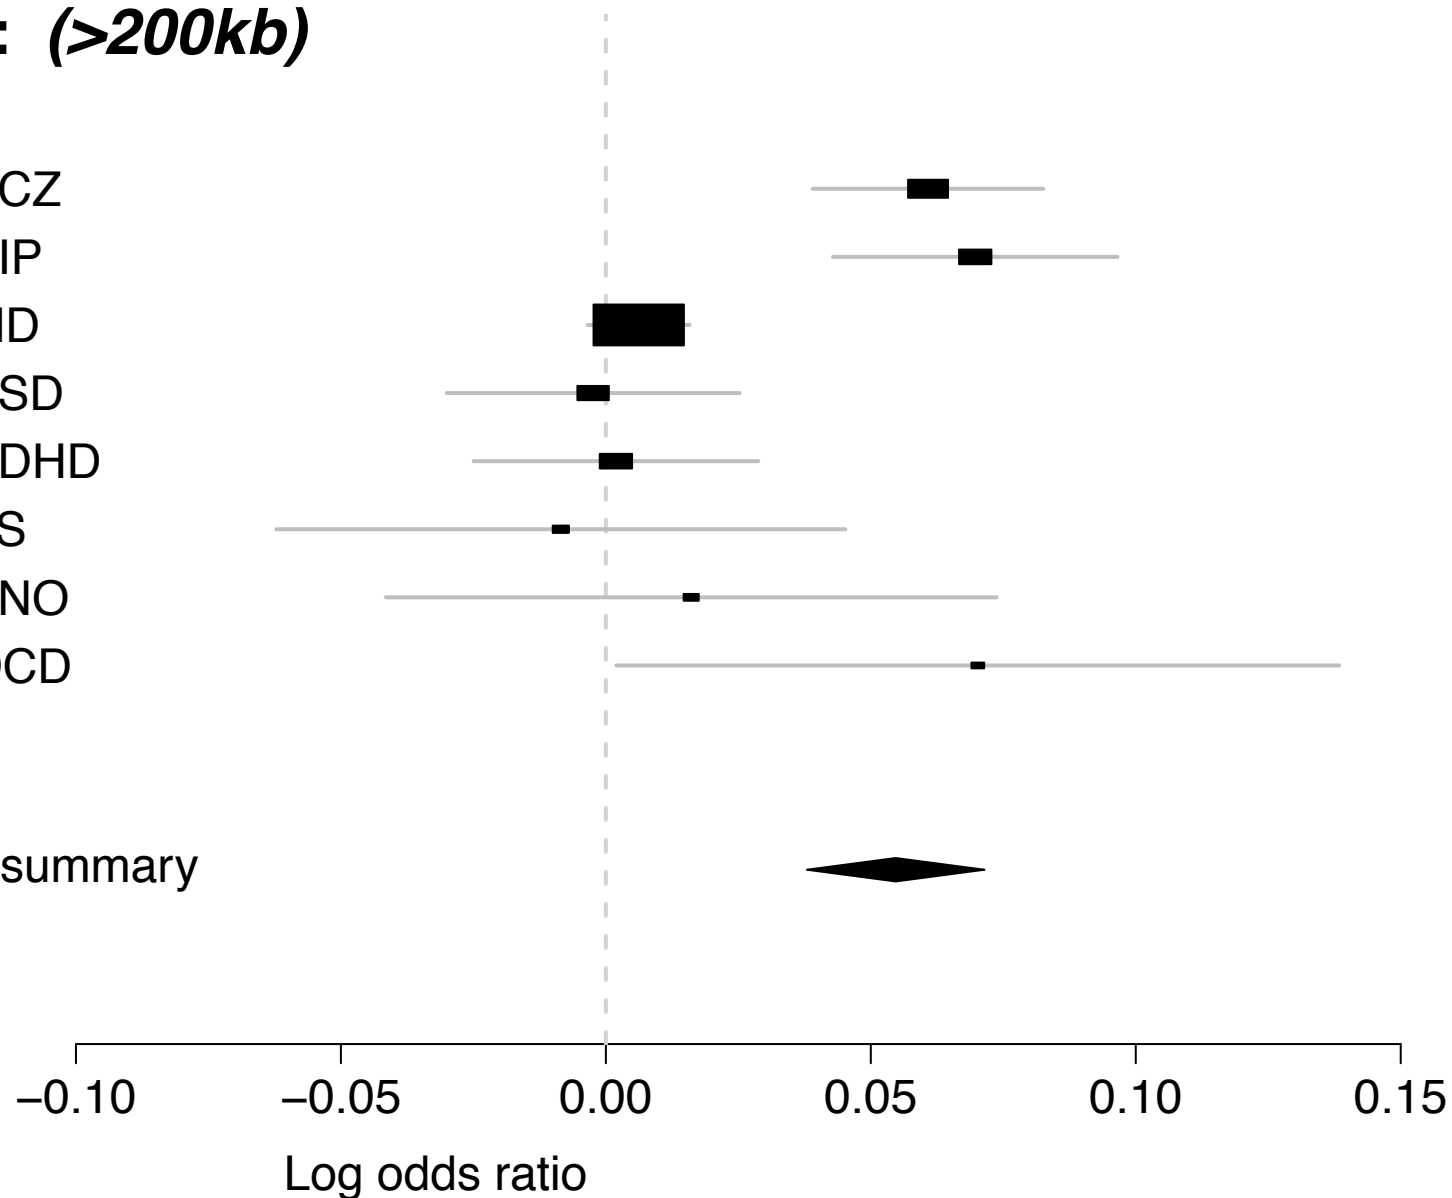

## PM-Plot

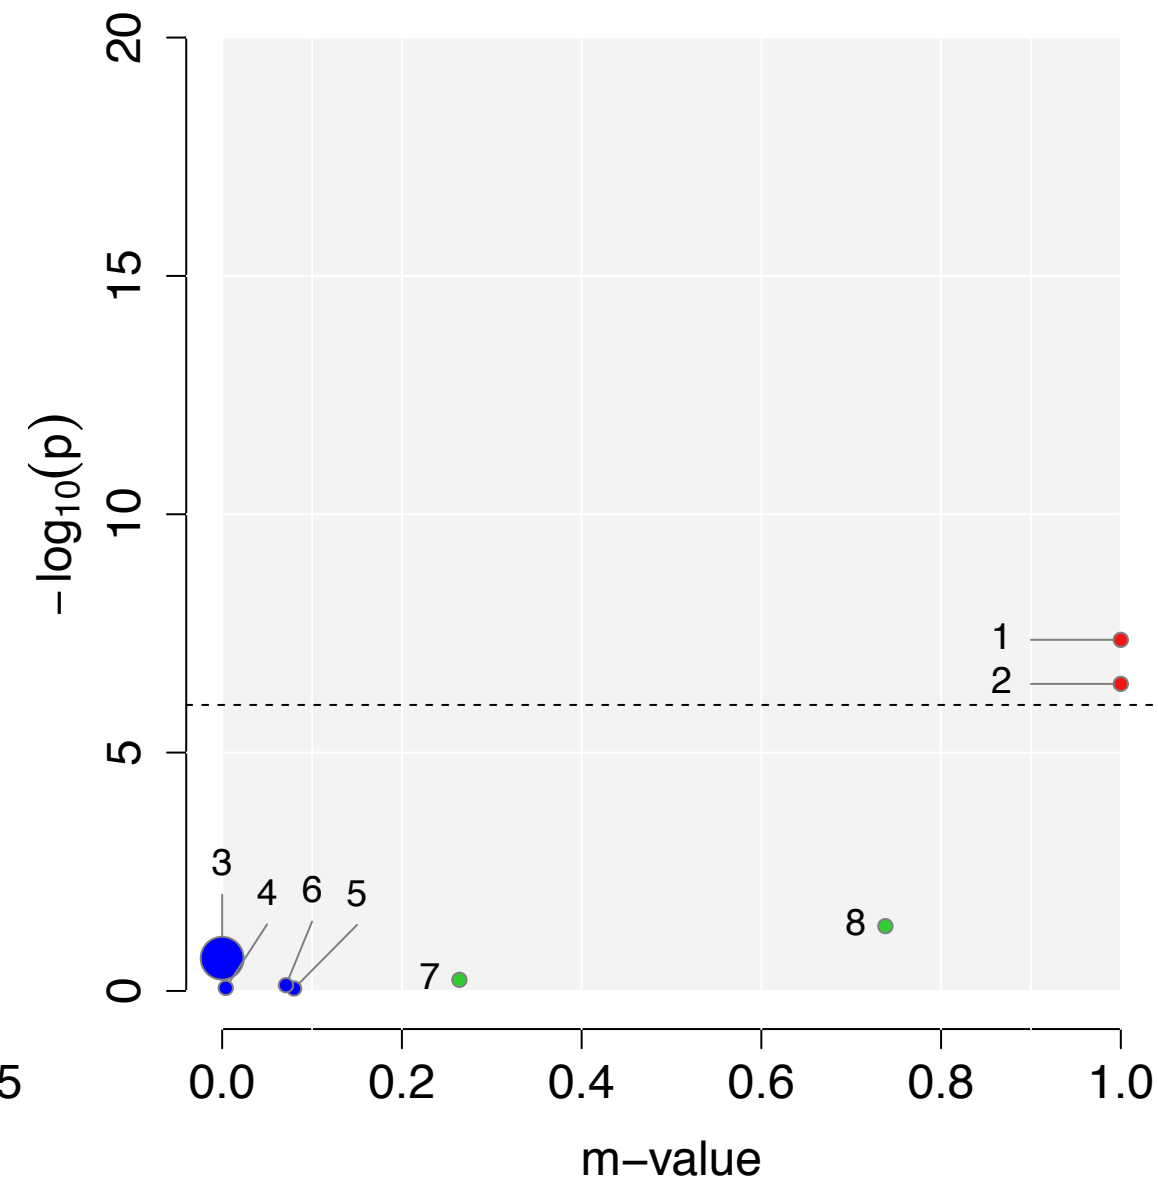

# rs35774874 (Meta $P = 1.84 \times 10^{-9}$ )

Gene : **SNX19**

## GWAS P-value

- $2.31 \times 10^{-9}$  ● 1.SCZ
- 0.0001 ● 2.BIP
- 0.2790 ● 3.MD
- 0.7939 ● 4.ASD
- 0.6302 ● 5.ADHD
- 0.5328 ● 6.TS
- 0.0502 ● 7.ANO
- 0.8650 ● 8.OCD

FE summary

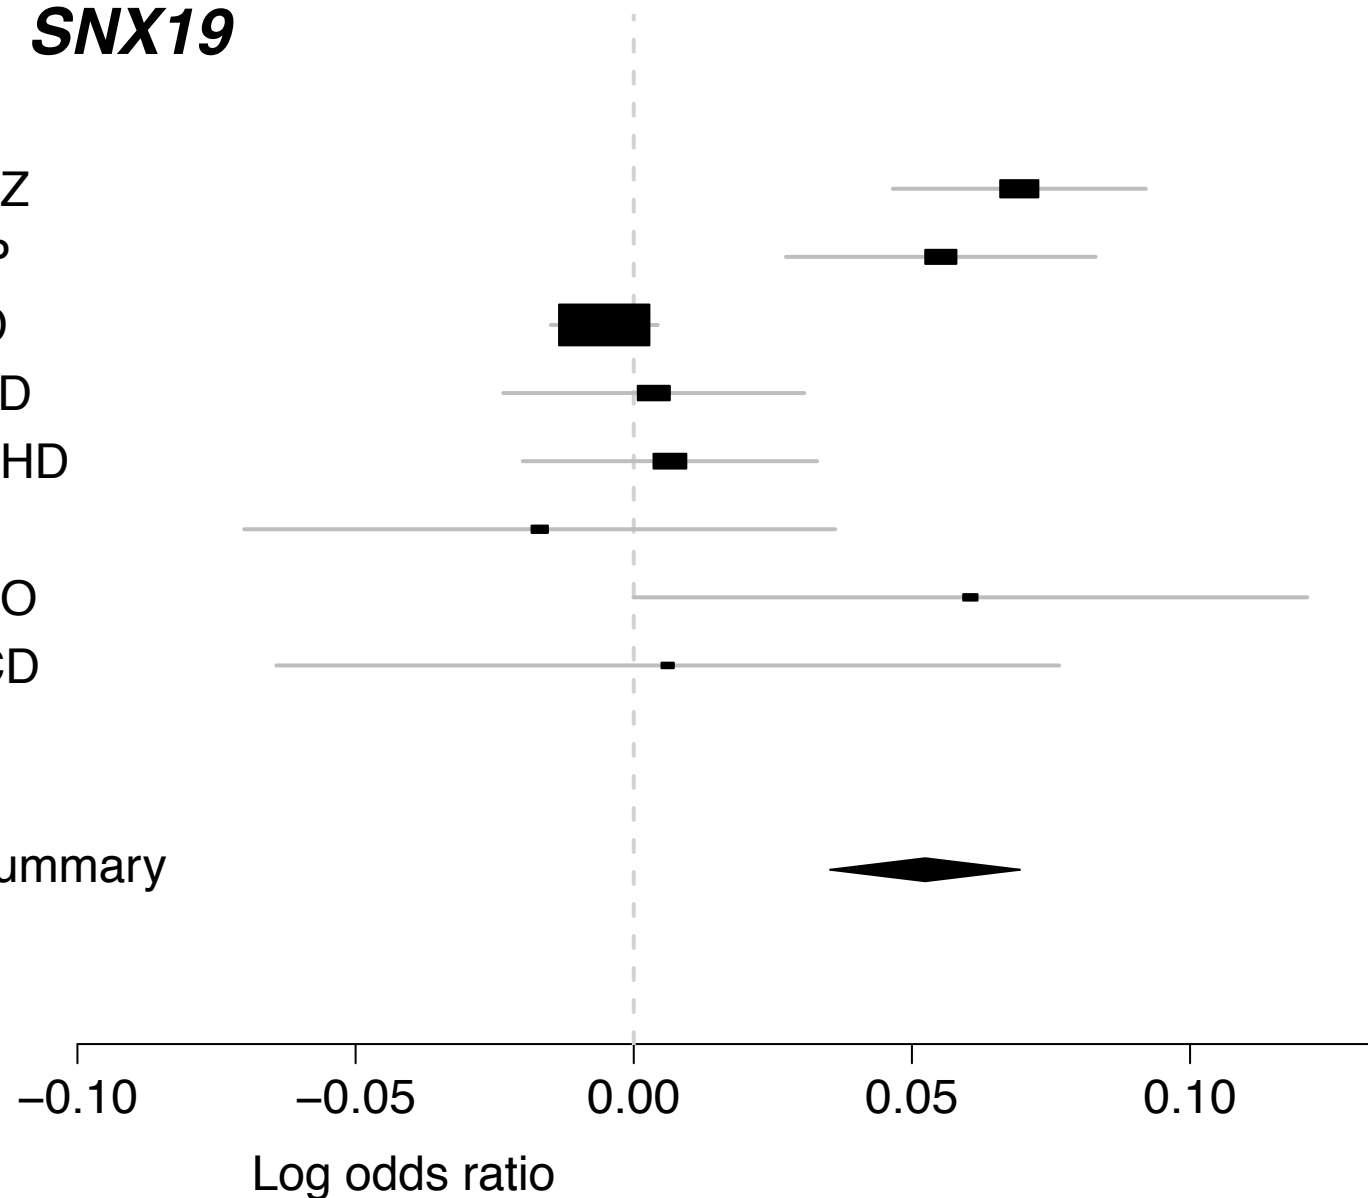

## PM-Plot

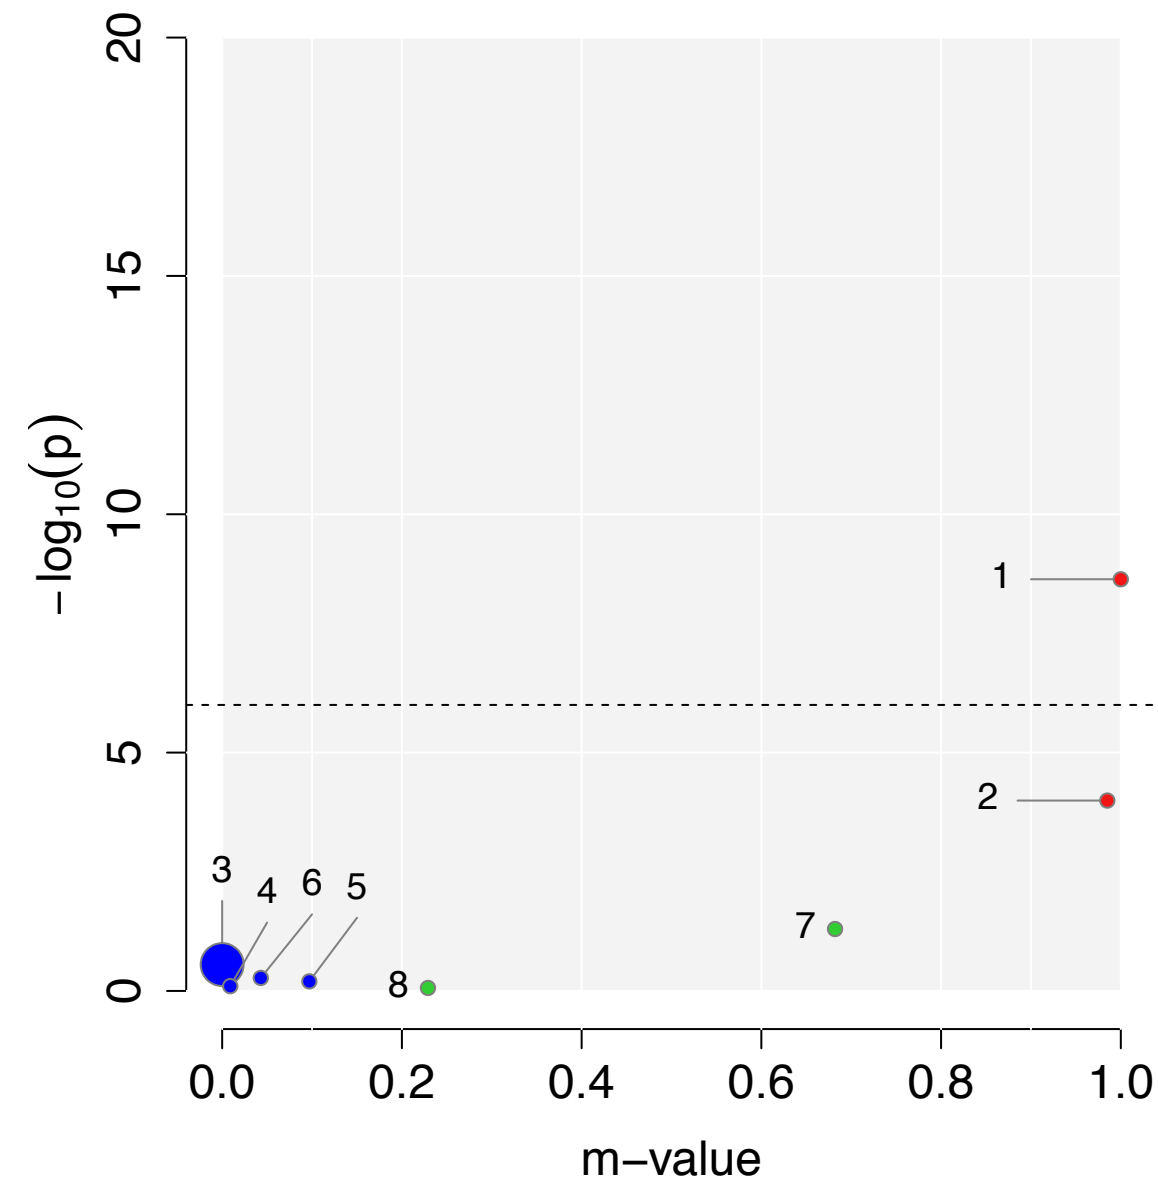

# rs36063234 (Meta $P = 5.11 \times 10^{-10}$ )

Gene : *NPAS3*

## GWAS P-value

- 0.9887 ● 1.SCZ
- $1.48 \times 10^{-5}$  ● 2.BIP
- 0.0052 ● 3.MD
- 0.0002 ● 4.ASD
- $3.40 \times 10^{-5}$  ● 5.ADHD
- 0.0020 ● 6.TS
- 0.8781 ● 7.ANO
- 0.3821 ● 8.OCD

FE summary

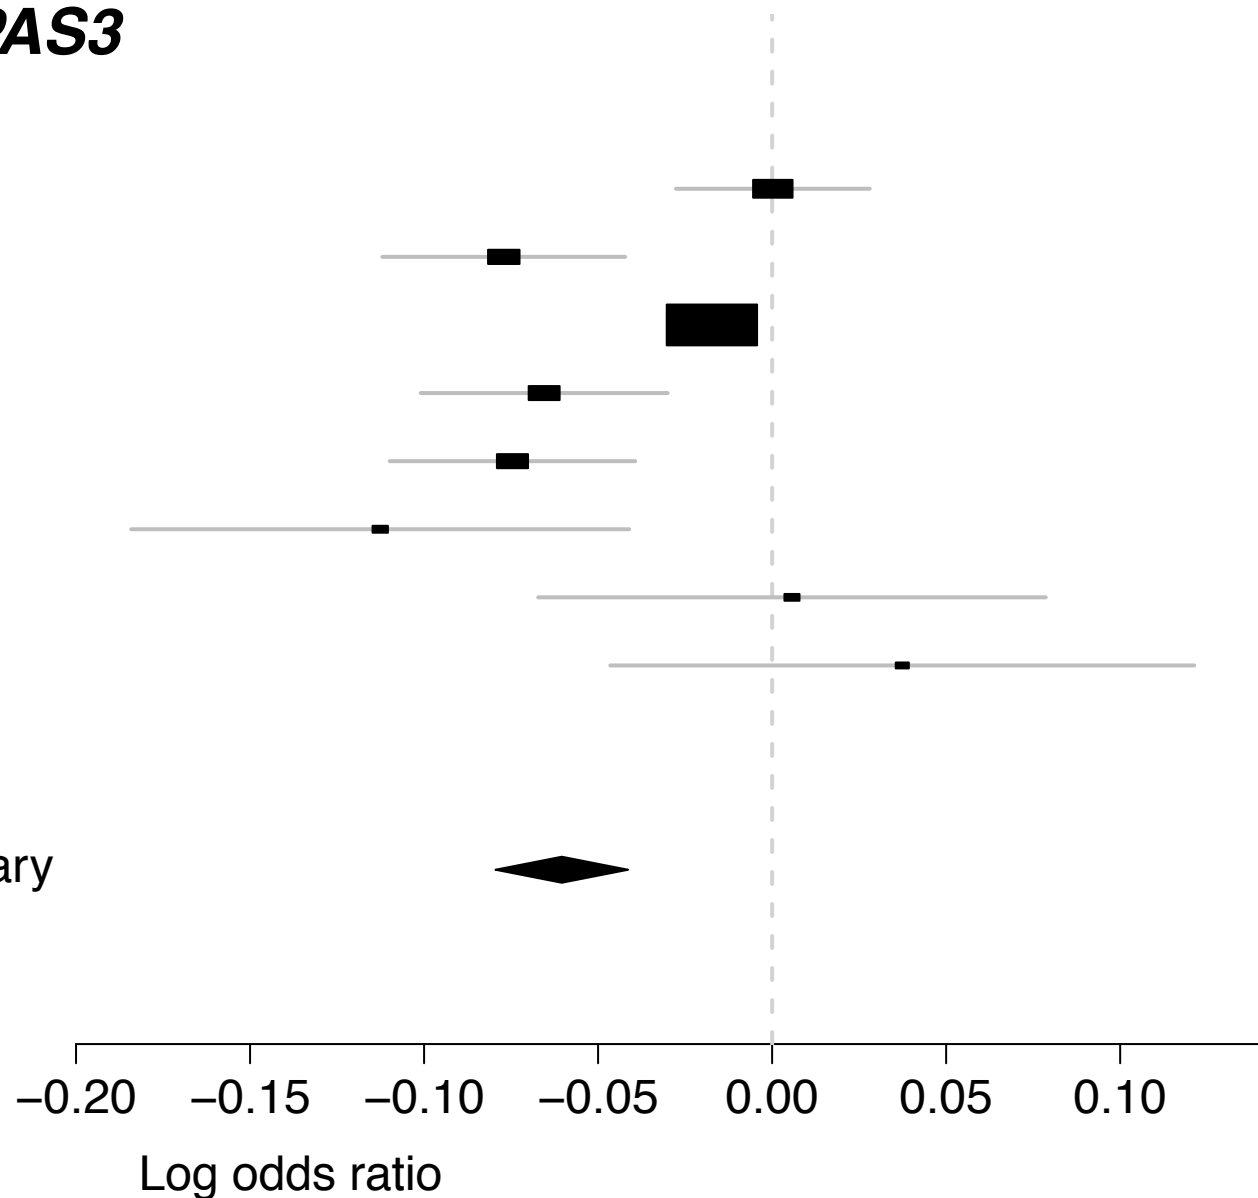

## PM-Plot

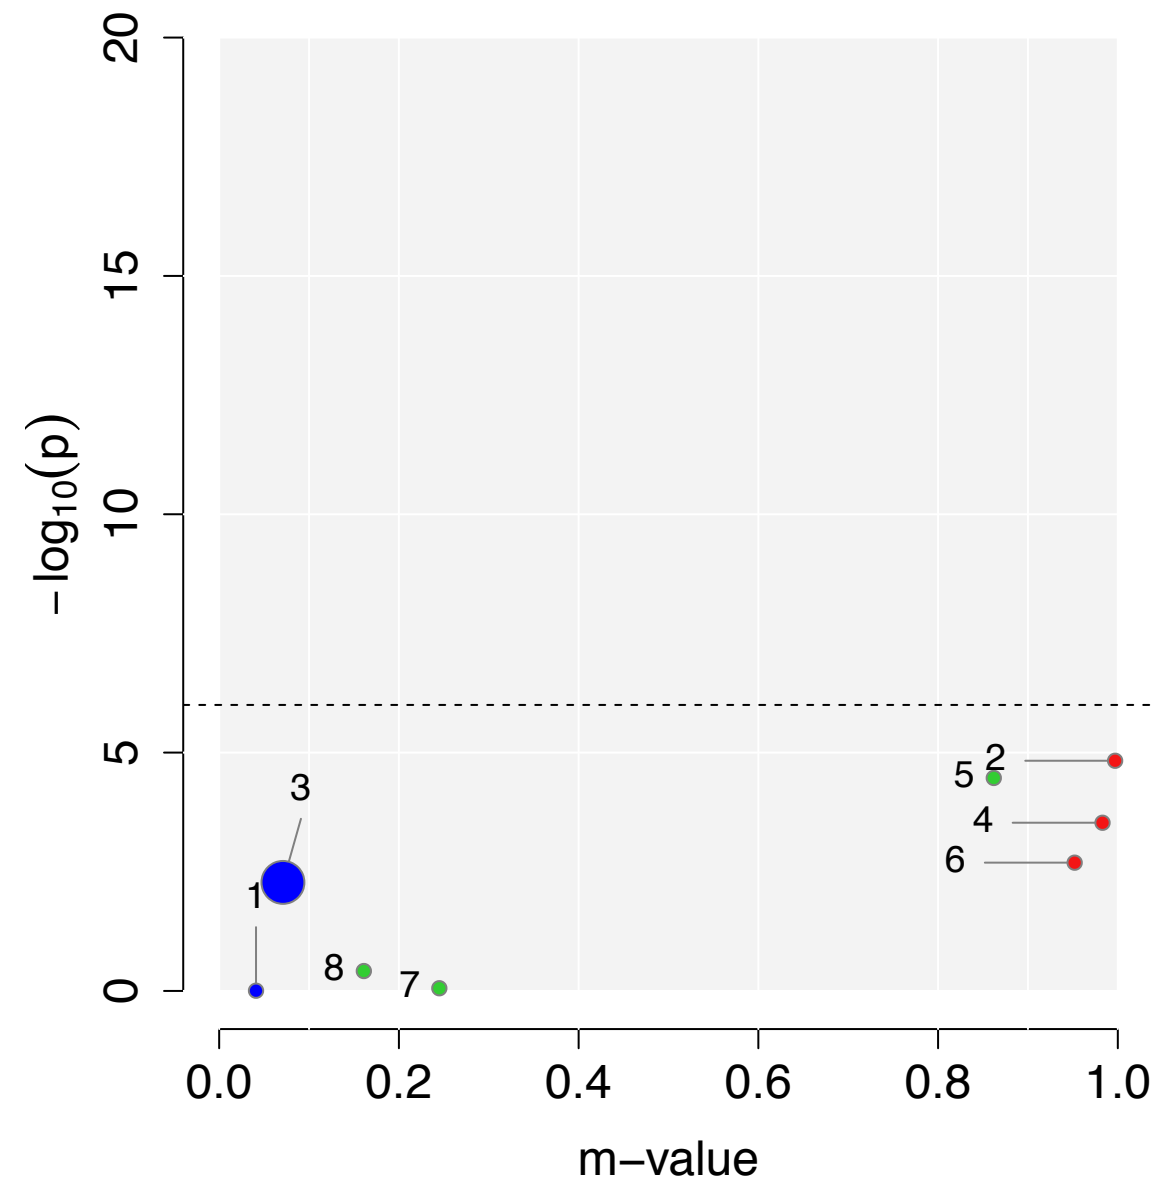

# rs55648125 (Meta $P = 8.74 \times 10^{-9}$ )

Gene : *TFAP2B*, *TFAP2D*

## GWAS P-value

- 0.0007 ● 1.SCZ
- $5.14 \times 10^{-8}$  ● 2.BIP
- 0.0990 ● 3.MD
- 0.0019 ● 4.ASD
- 0.0037 ● 5.ADHD
- 0.7638 ● 6.TS
- 0.1441 ● 7.ANO
- 0.8040 ● 8.OCD

FE summary

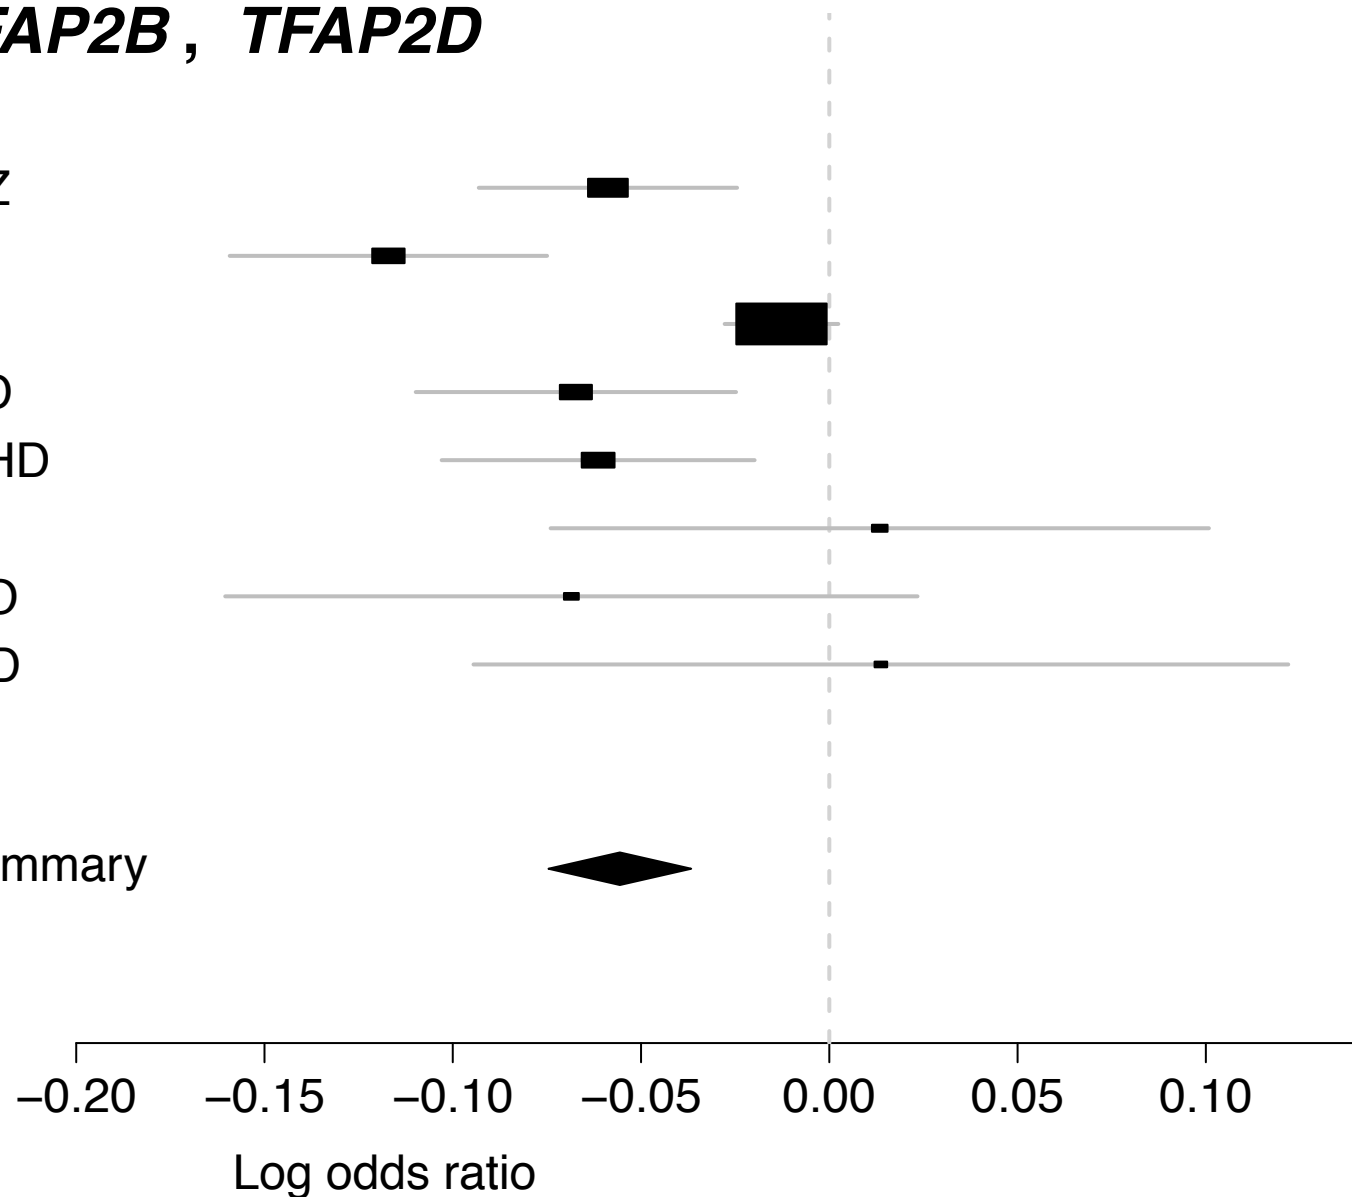

## PM-Plot

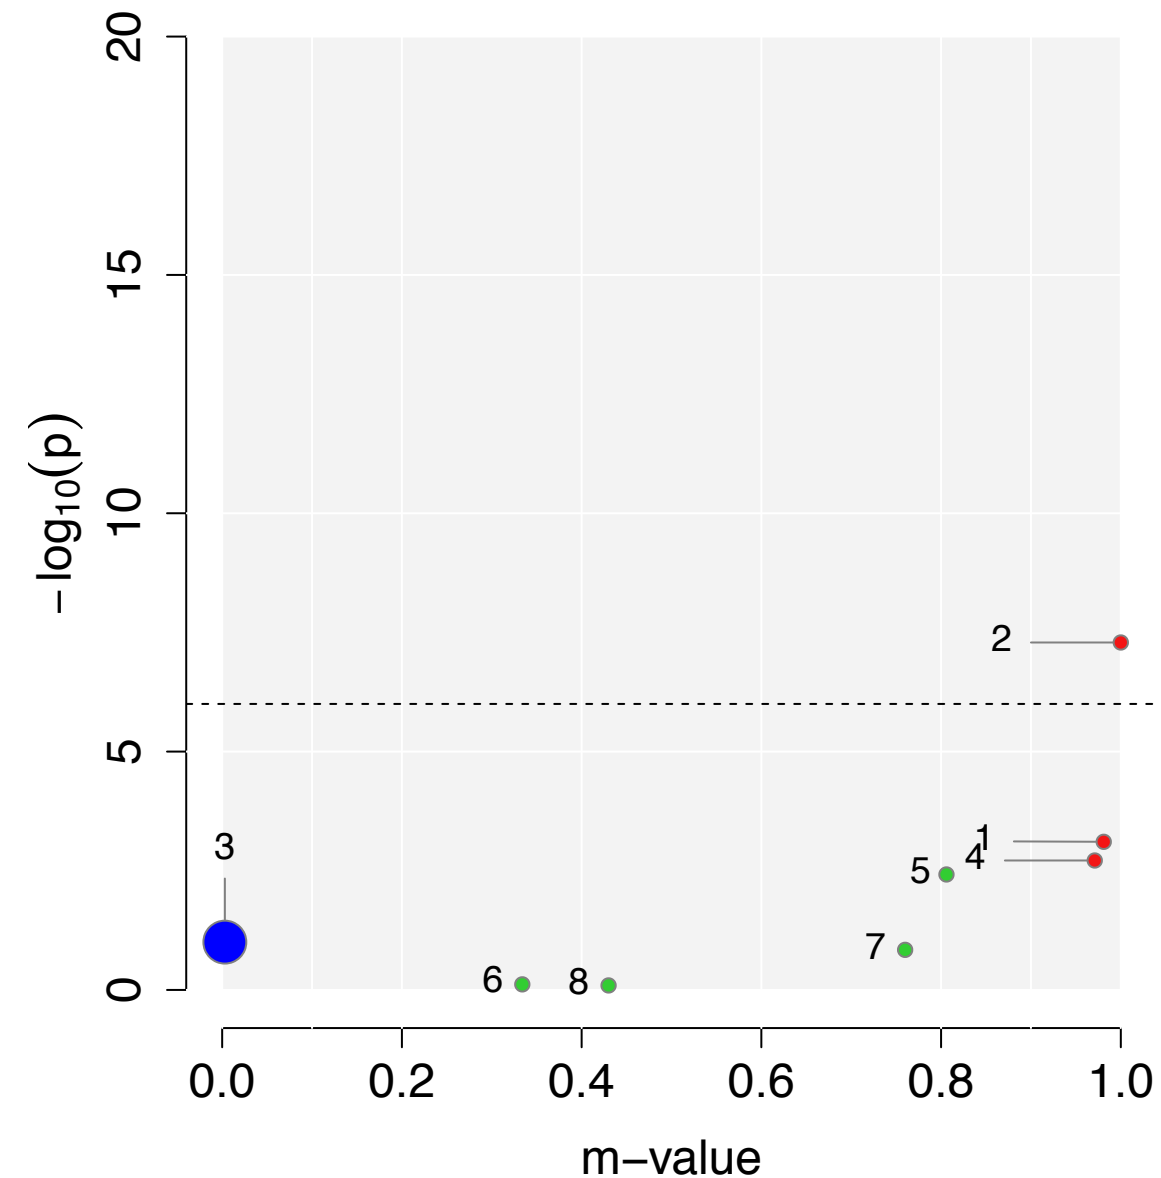



rs55661361 (Meta  $P = 2.02 \times 10^{-11}$ )

Gene : *NRGN*, *VSIG2*

GWAS P-value

- 1.09 x 10<sup>-11</sup> ● 1.SCZ
- 0.1372 ● 2.BIP
- 0.2241 ● 3.MD
- 0.0011 ● 4.ASD
- 0.0551 ● 5.ADHD
- 0.7894 ● 6.TS
- 0.9711 ● 7.ANO
- 0.2651 ● 8.OCD

FE summary

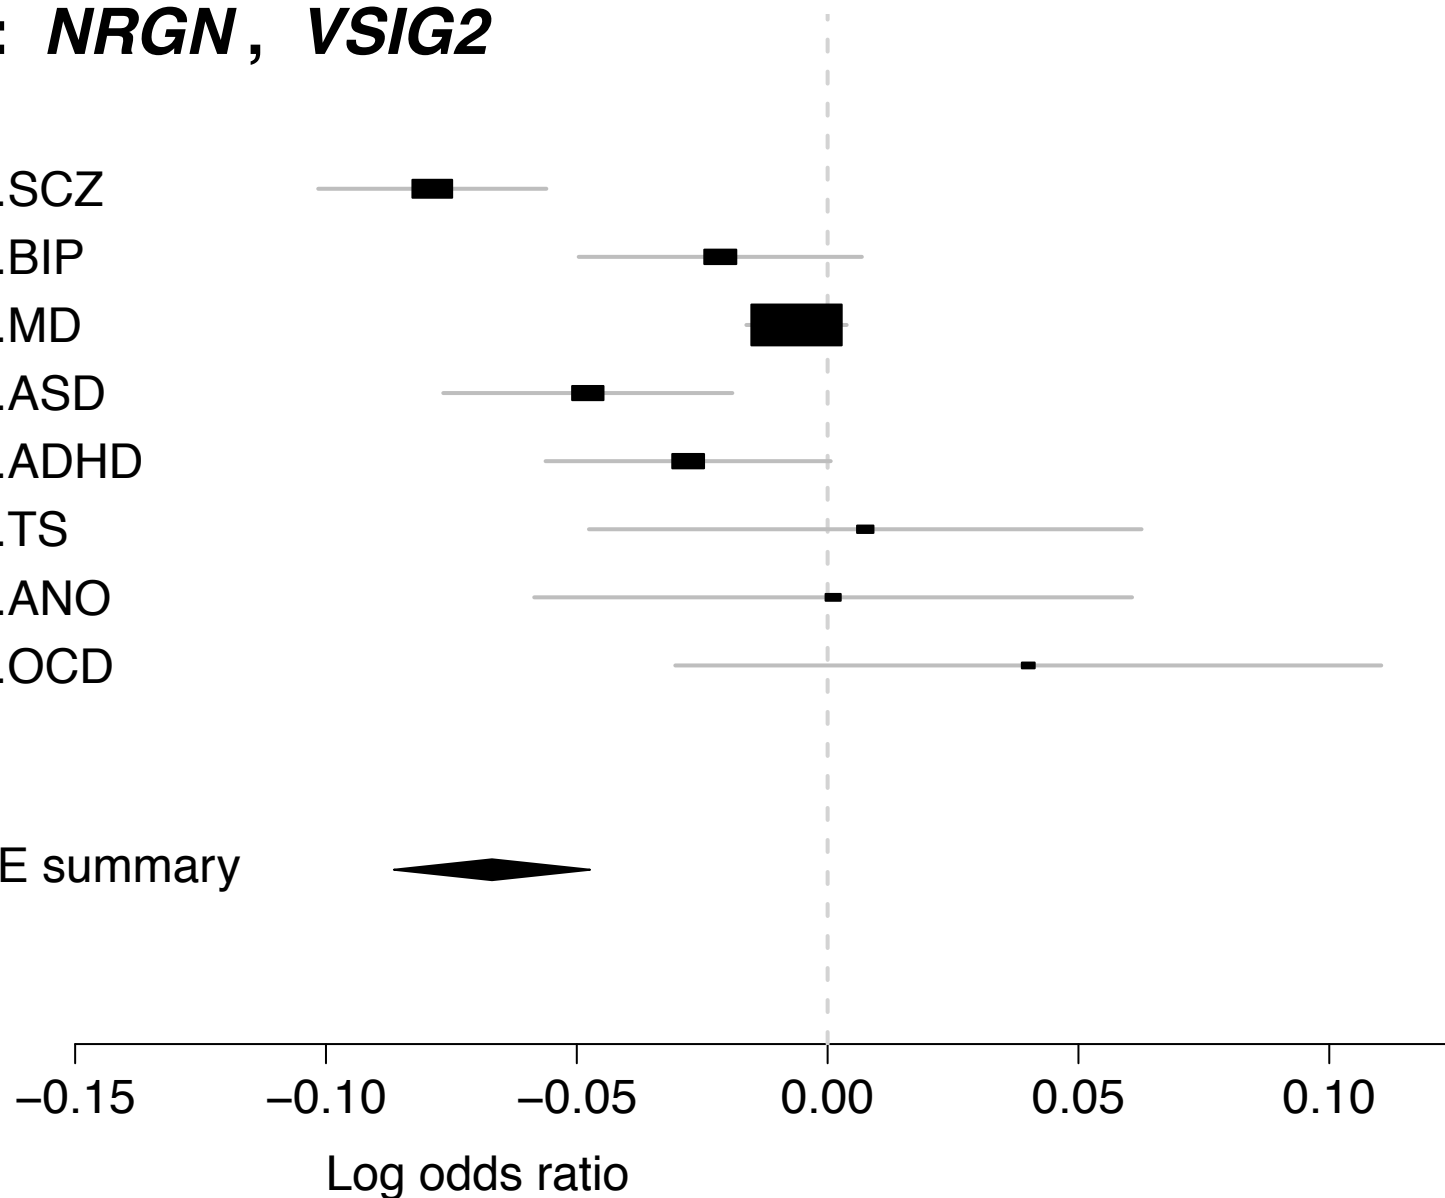

PM-Plot

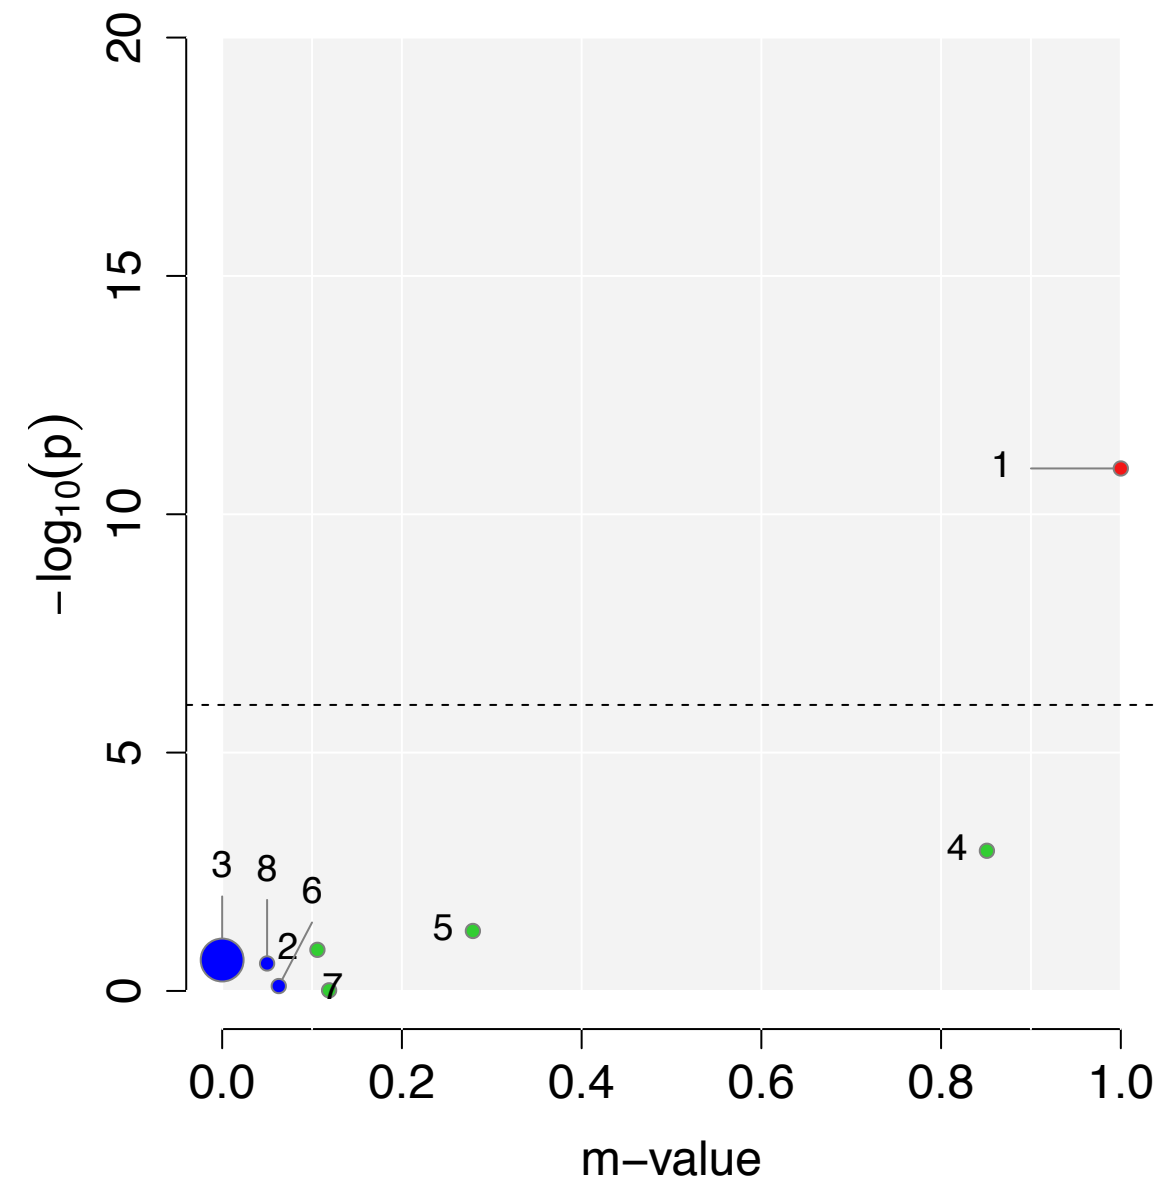

rs58235352 (Meta  $P = 4.71 \times 10^{-8}$ )

Gene : *ACADS*, *SPPL3*

GWAS P-value

- 0.0798 ● 1.SCZ
- 0.0015 ● 2.BIP
- $1.26 \times 10^{-7}$  ● 3.MD
- 0.1157 ● 4.ASD
- 0.6739 ● 5.ADHD
- 0.1084 ● 6.TS
- 0.2321 ● 7.ANO
- 0.8092 ● 8.OCD

FE summary

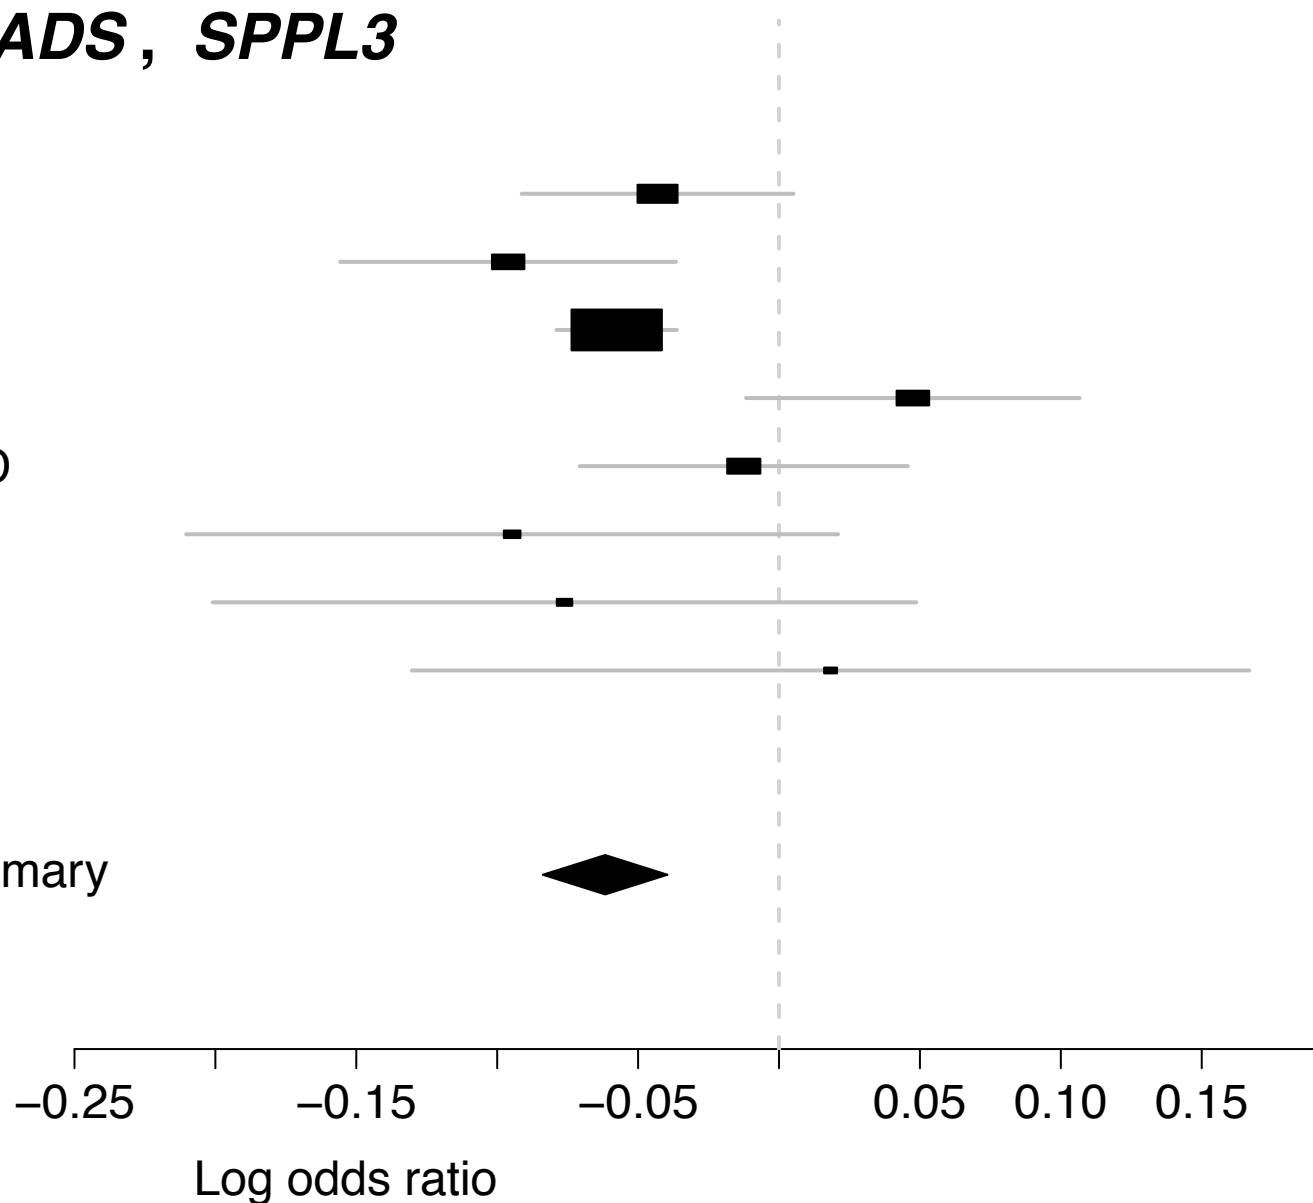

PM-Plot

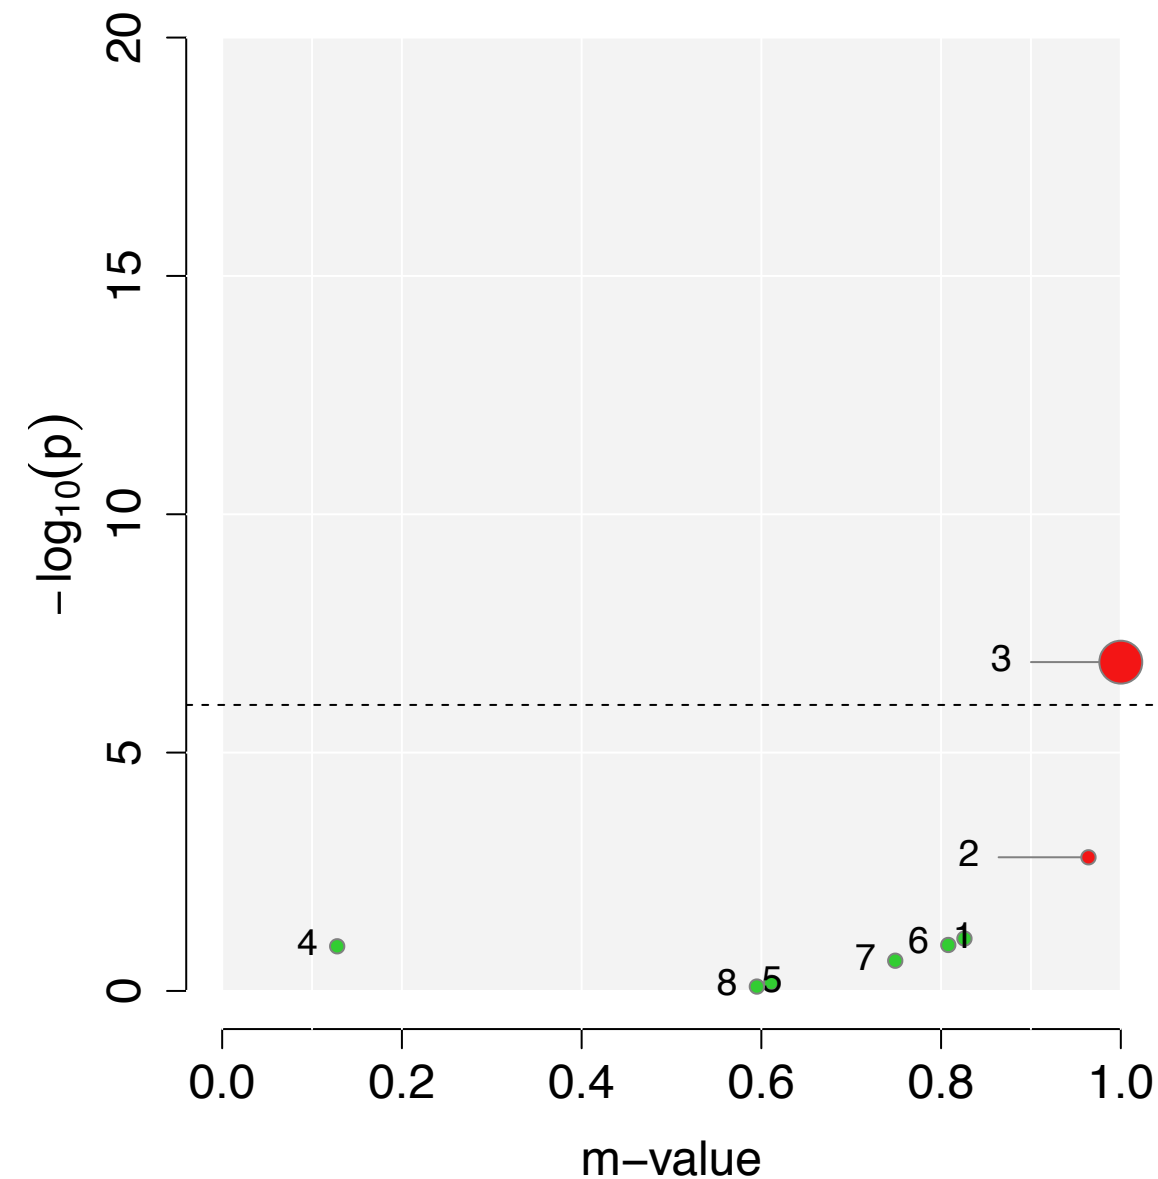

# rs59979824 (Meta $P = 4.46 \times 10^{-9}$ )

Gene : (>200kb)

## GWAS P-value

- 2.42 x 10<sup>-9</sup> ● 1.SCZ
- 0.0001 ● 2.BIP
- 0.8474 ● 3.MD
- 0.1483 ● 4.ASD
- 0.6421 ● 5.ADHD
- 0.7556 ● 6.TS
- 0.0812 ● 7.ANO
- 0.5112 ● 8.OCD

FE summary

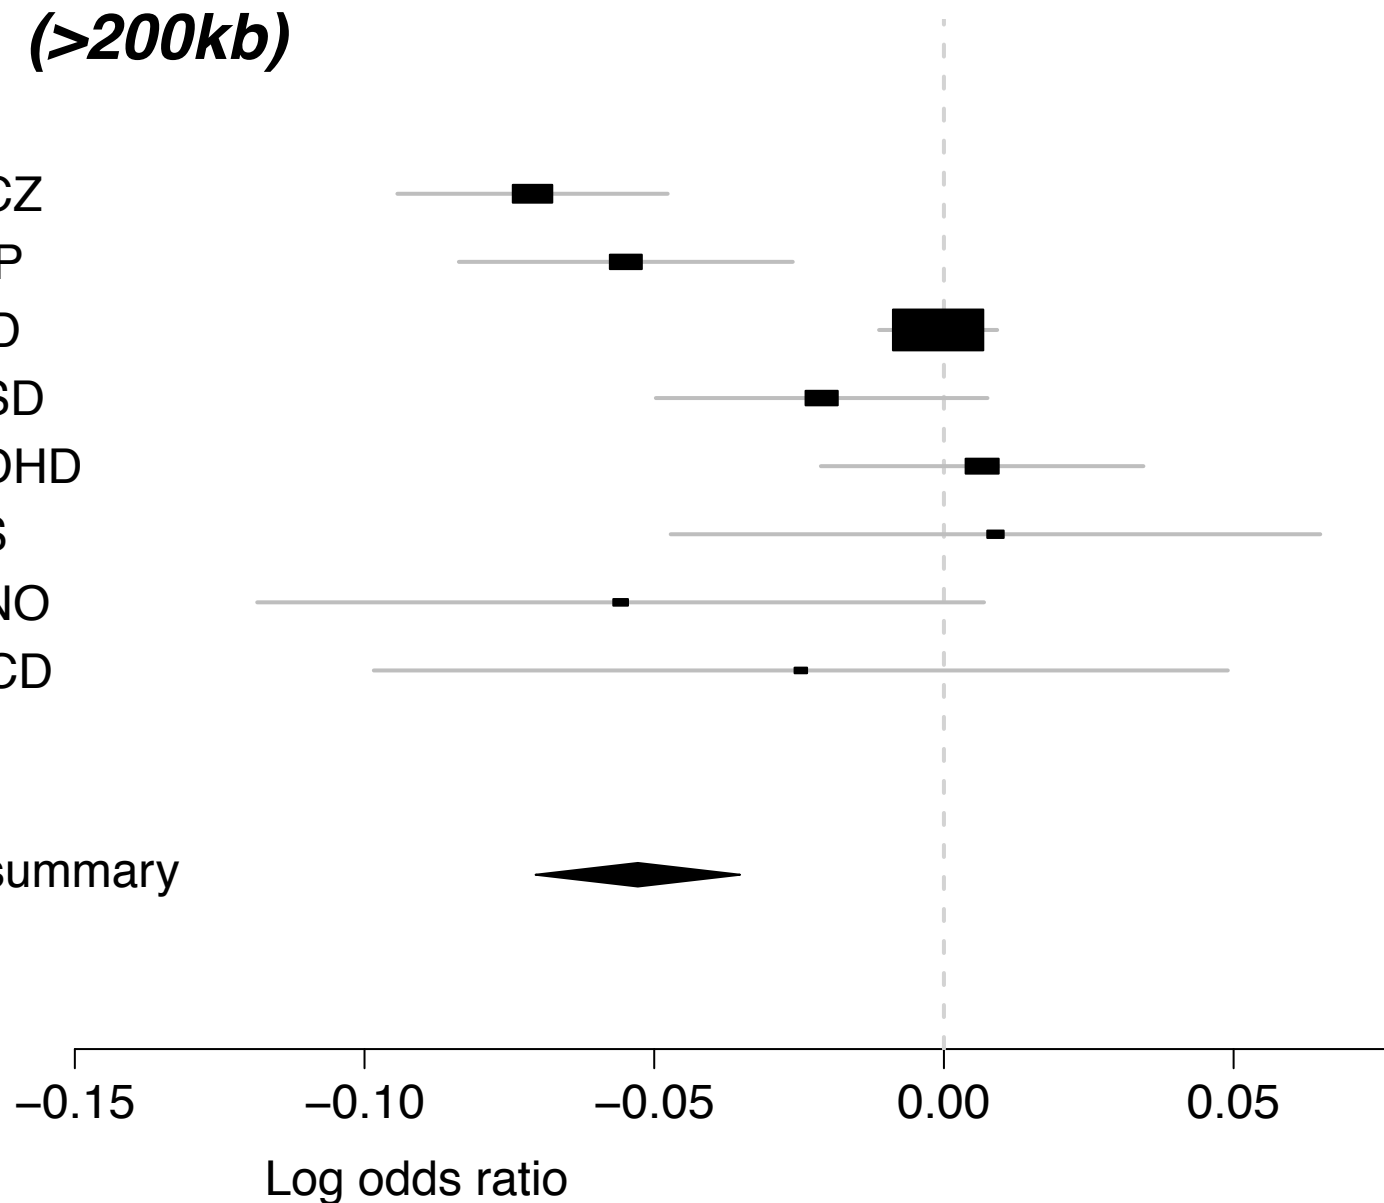

## PM-Plot

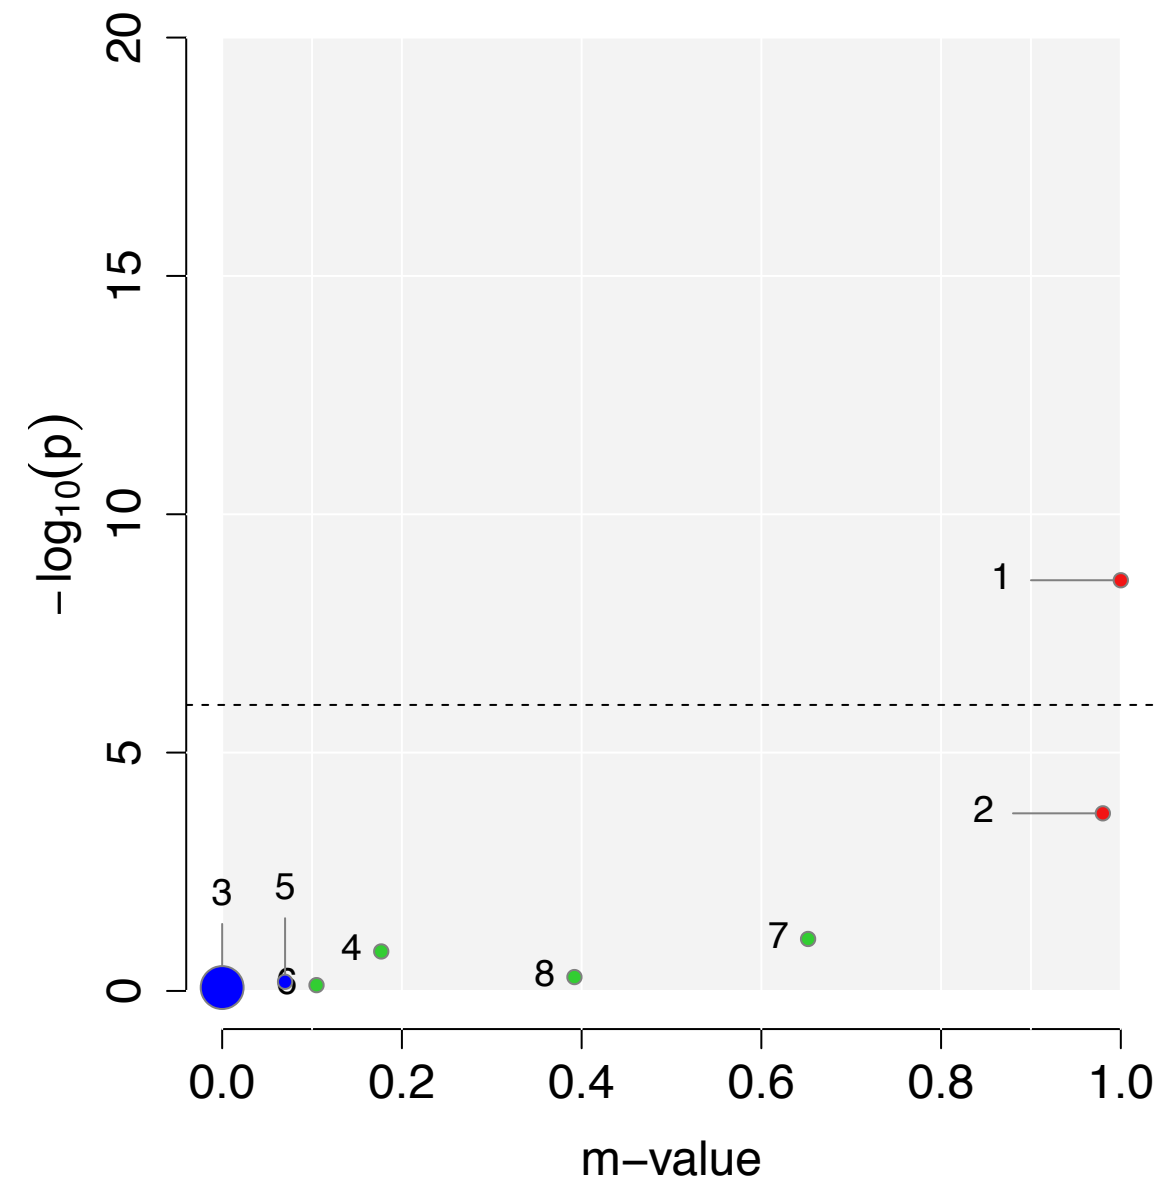

# rs61867293 (Meta $P = 7.81 \times 10^{-15}$ )

Gene : **SORCS3**

## GWAS P-value

- 4.96 x 10<sup>-6</sup> ● 1.SCZ
- 0.0073 ● 2.BIP
- 8.71 x 10<sup>-10</sup> ● 3.MD
- 0.0029 ● 4.ASD
- 1.95 x 10<sup>-7</sup> ● 5.ADHD
- 0.3855 ● 6.TS
- 0.0321 ● 7.ANO
- 0.6997 ● 8.OCD

FE summary

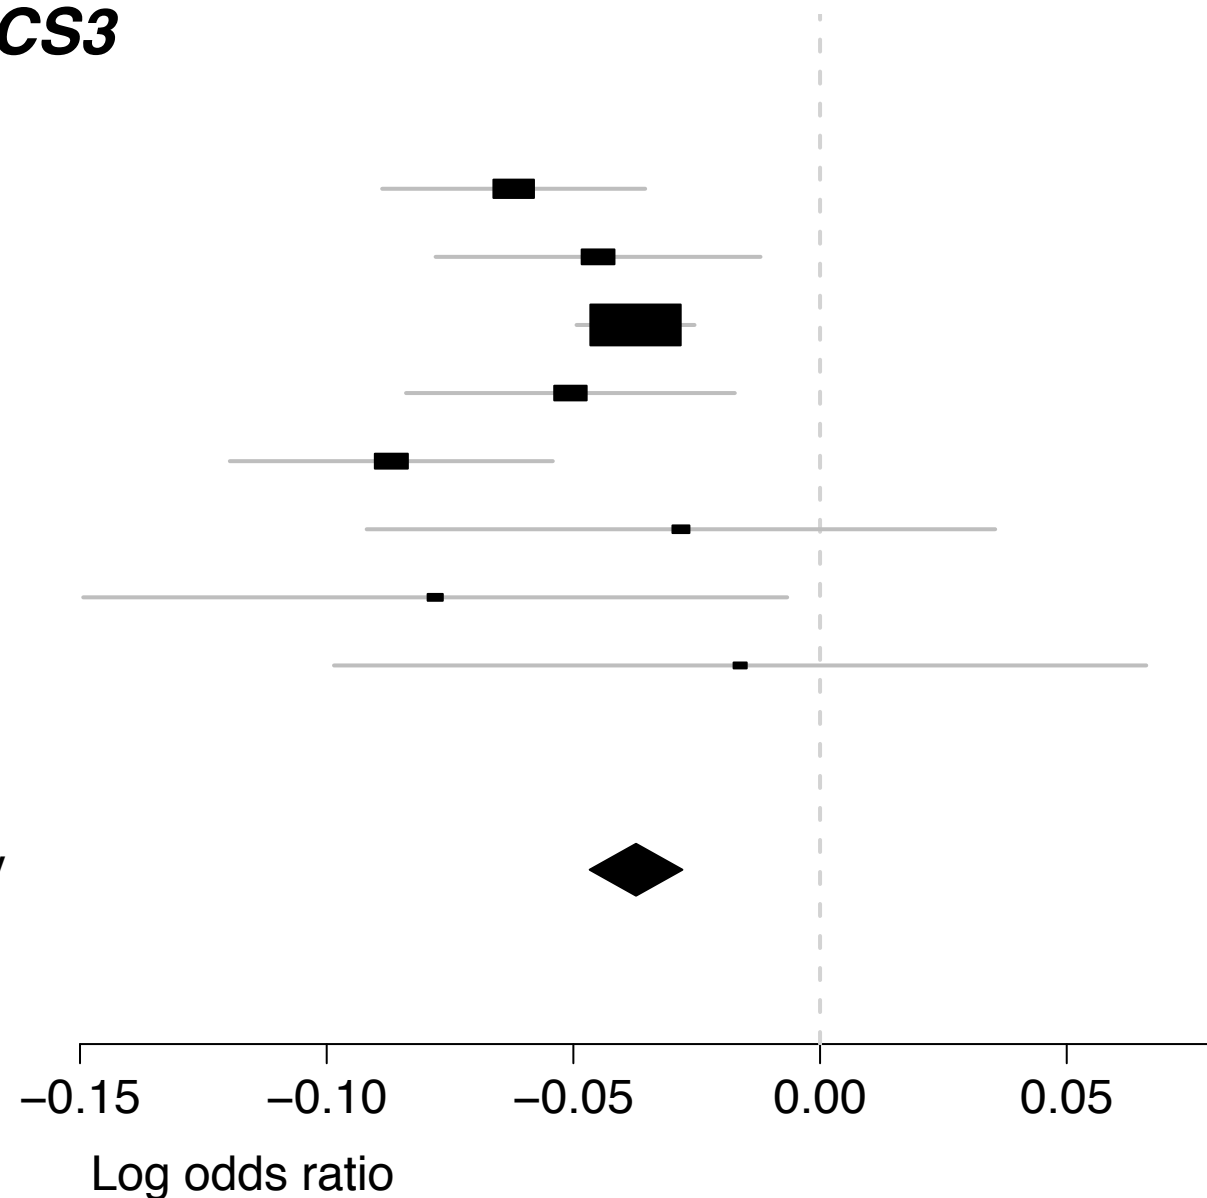

## PM-Plot

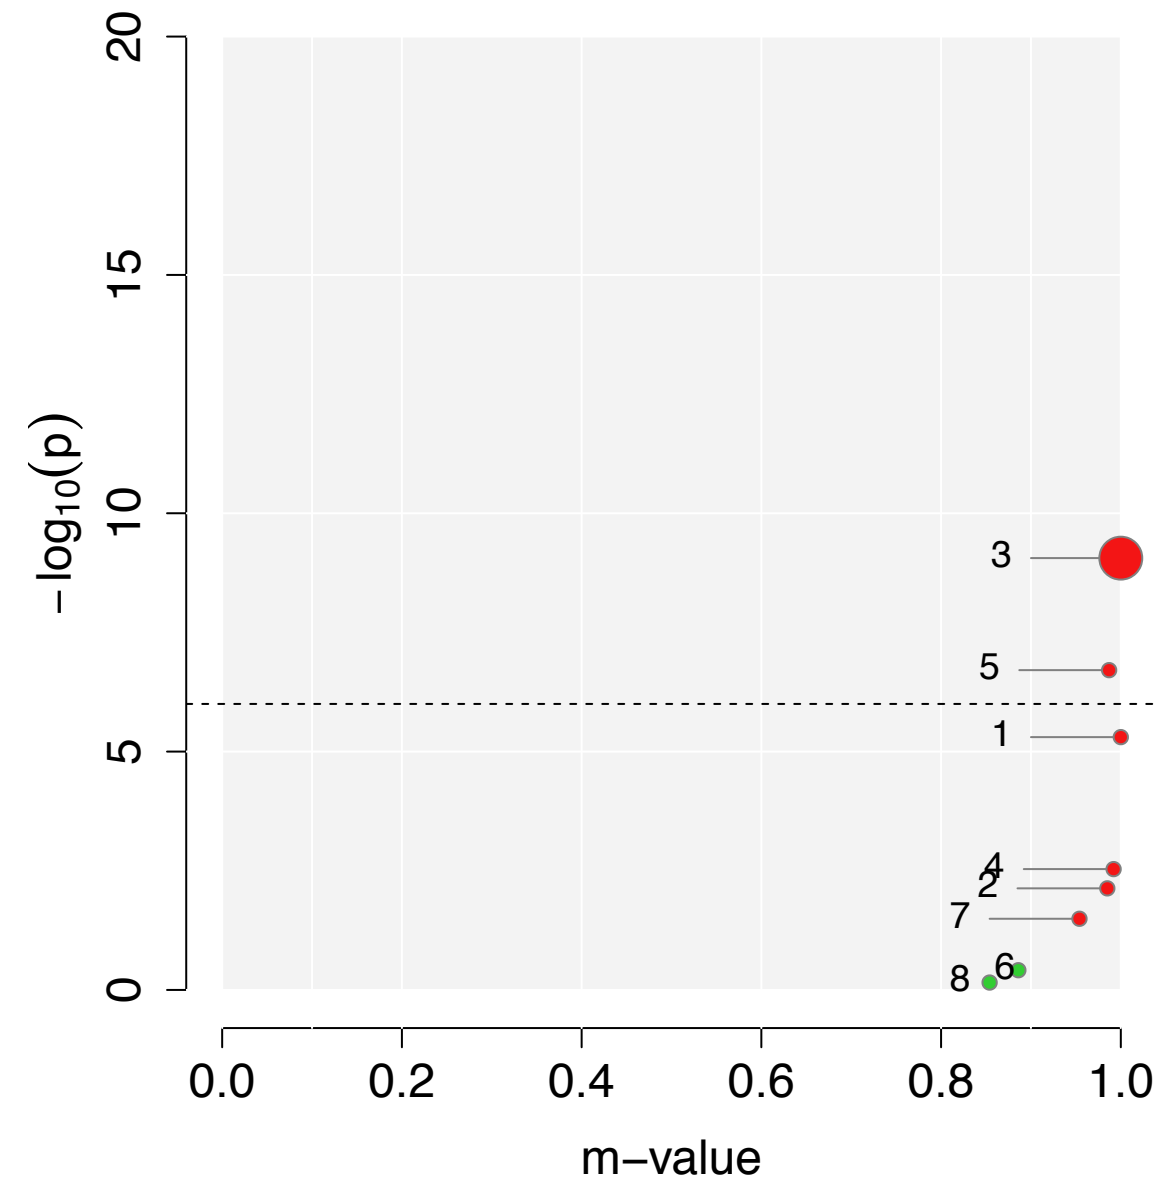

rs61882743 (Meta  $P = 1.15 \times 10^{-8}$ )

Gene : *AMBRA1*, *HARBI1*

GWAS P-value

- 2.71 x 10<sup>-10</sup> ● 1.SCZ
- 0.2932 ● 2.BIP
- 0.0439 ● 3.MD
- 0.1328 ● 4.ASD
- 0.0070 ● 5.ADHD
- 0.7089 ● 6.TS
- 0.1963 ● 7.ANO
- 0.7055 ● 8.OCD

FE summary

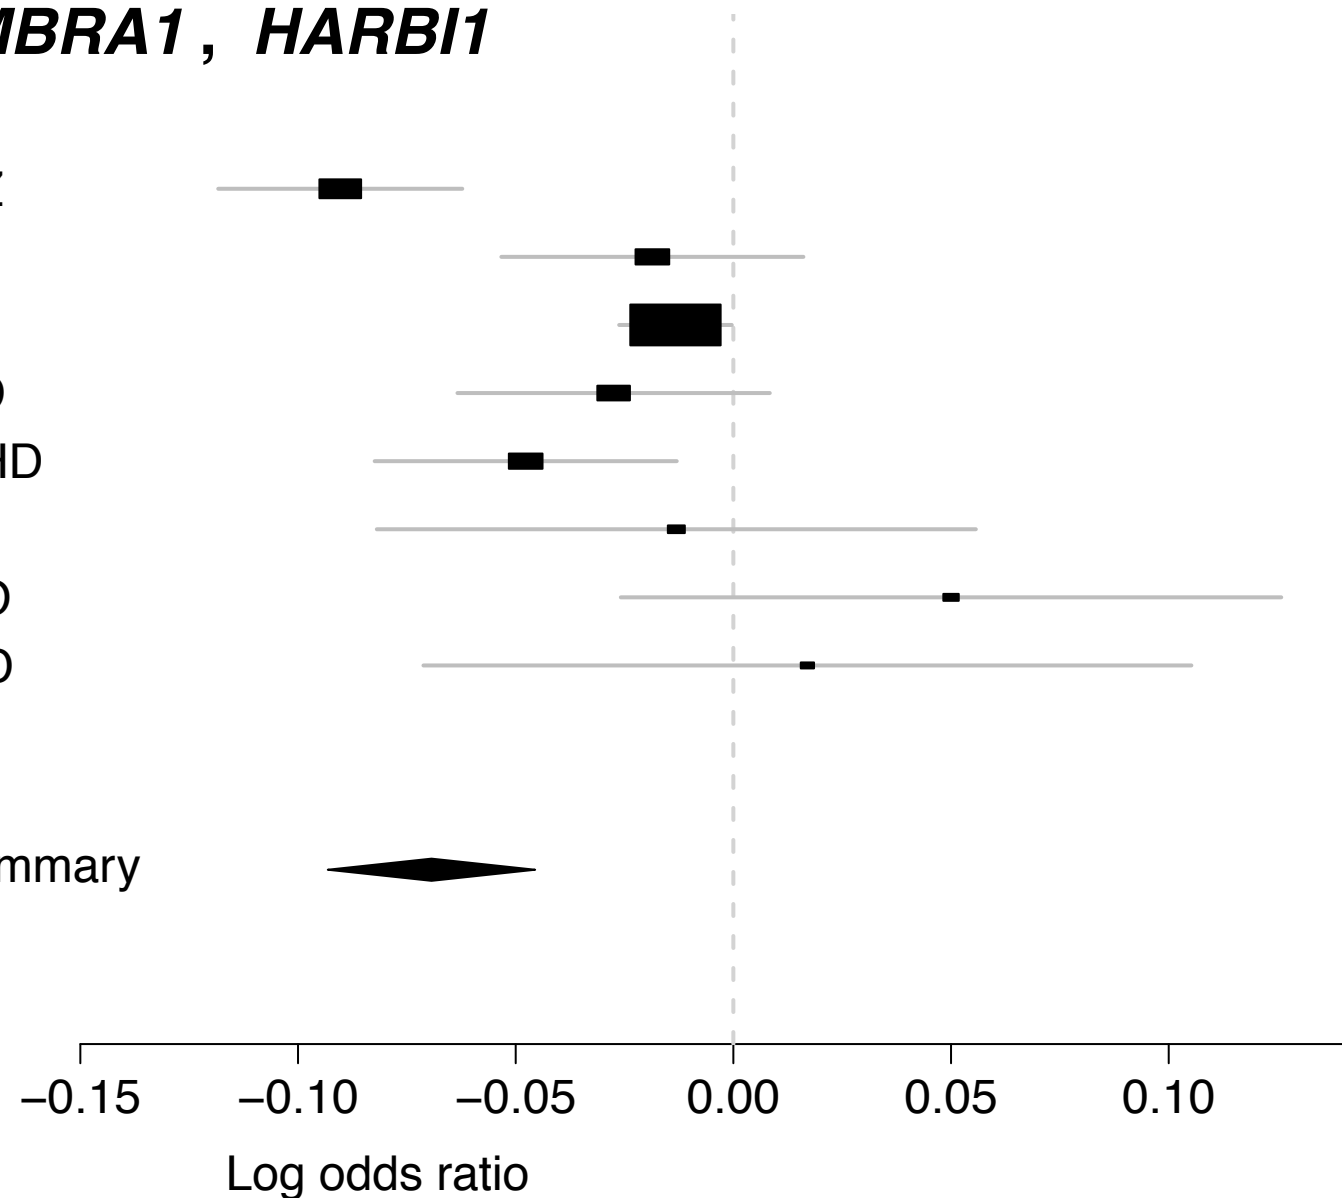

PM-Plot

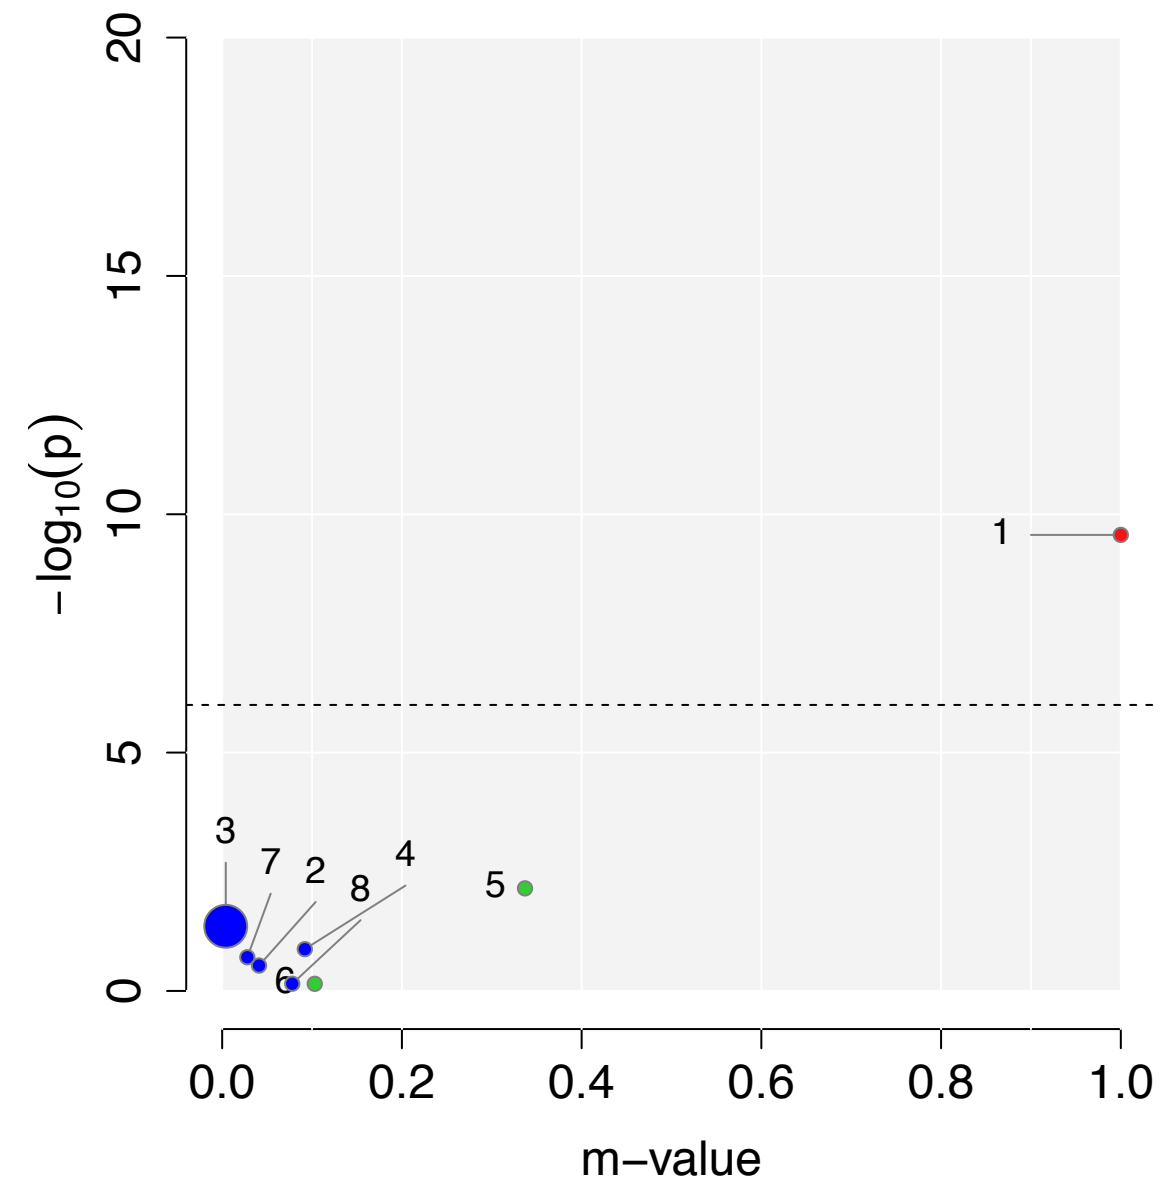

# rs62526783 (Meta $P = 2.34 \times 10^{-8}$ )

Gene : (>200kb)

## GWAS P-value

- 1.18 x 10<sup>-9</sup> ● 1.SCZ
- 0.0144 ● 2.BIP
- 0.3088 ● 3.MD
- 0.0132 ● 4.ASD
- 0.4150 ● 5.ADHD
- 0.5069 ● 6.TS
- 0.8647 ● 7.ANO
- 0.1750 ● 8.OCD

FE summary

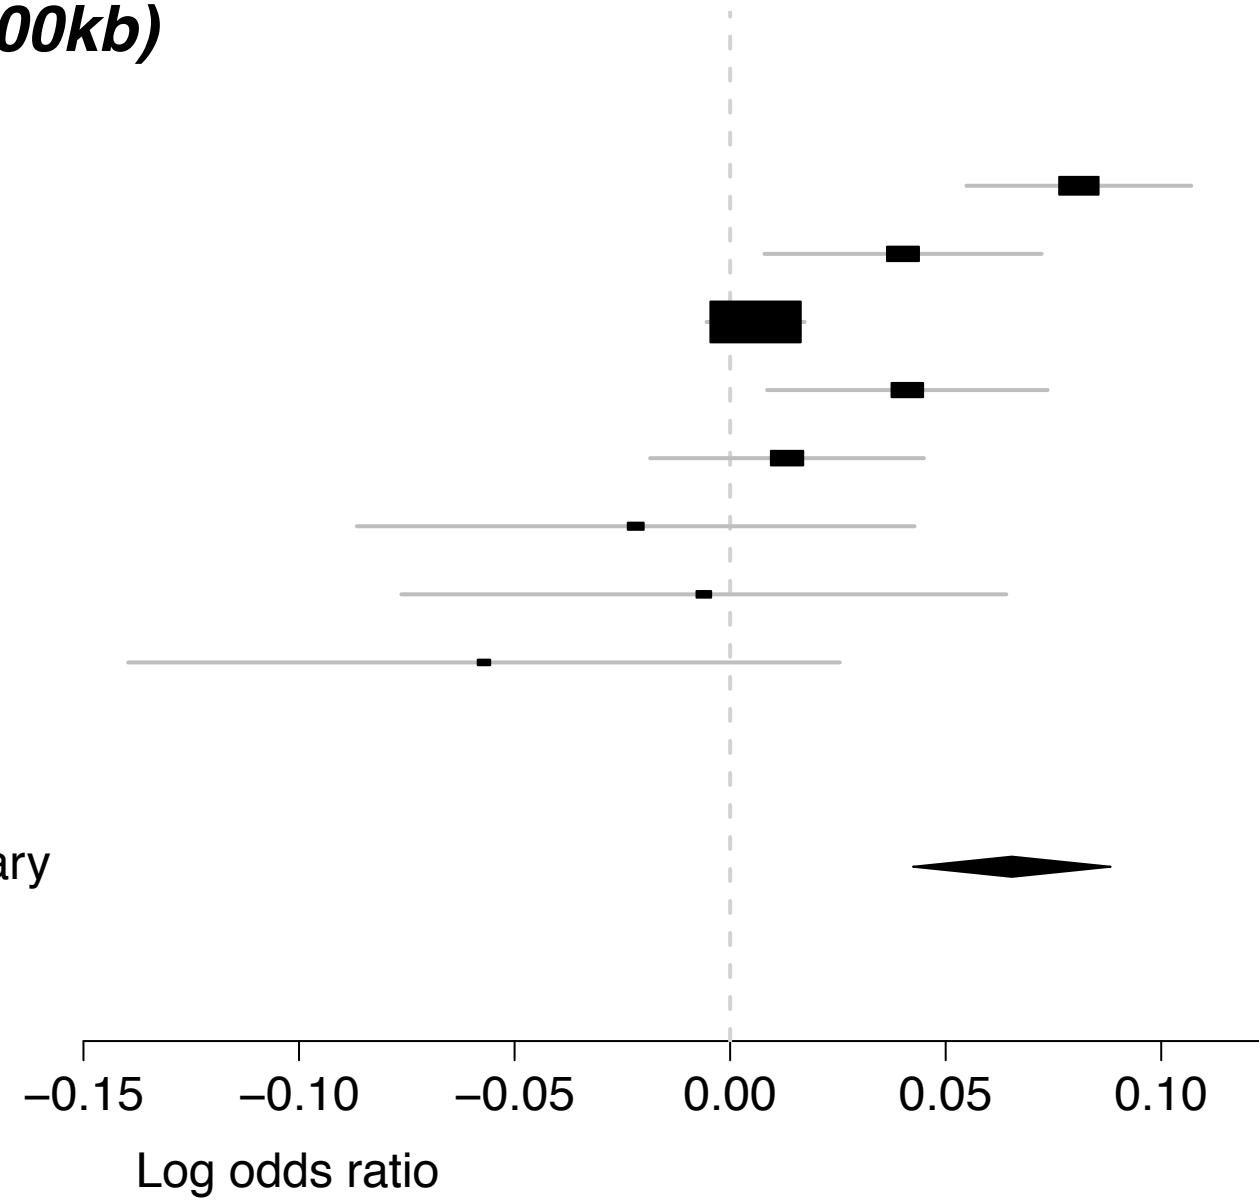

## PM-Plot

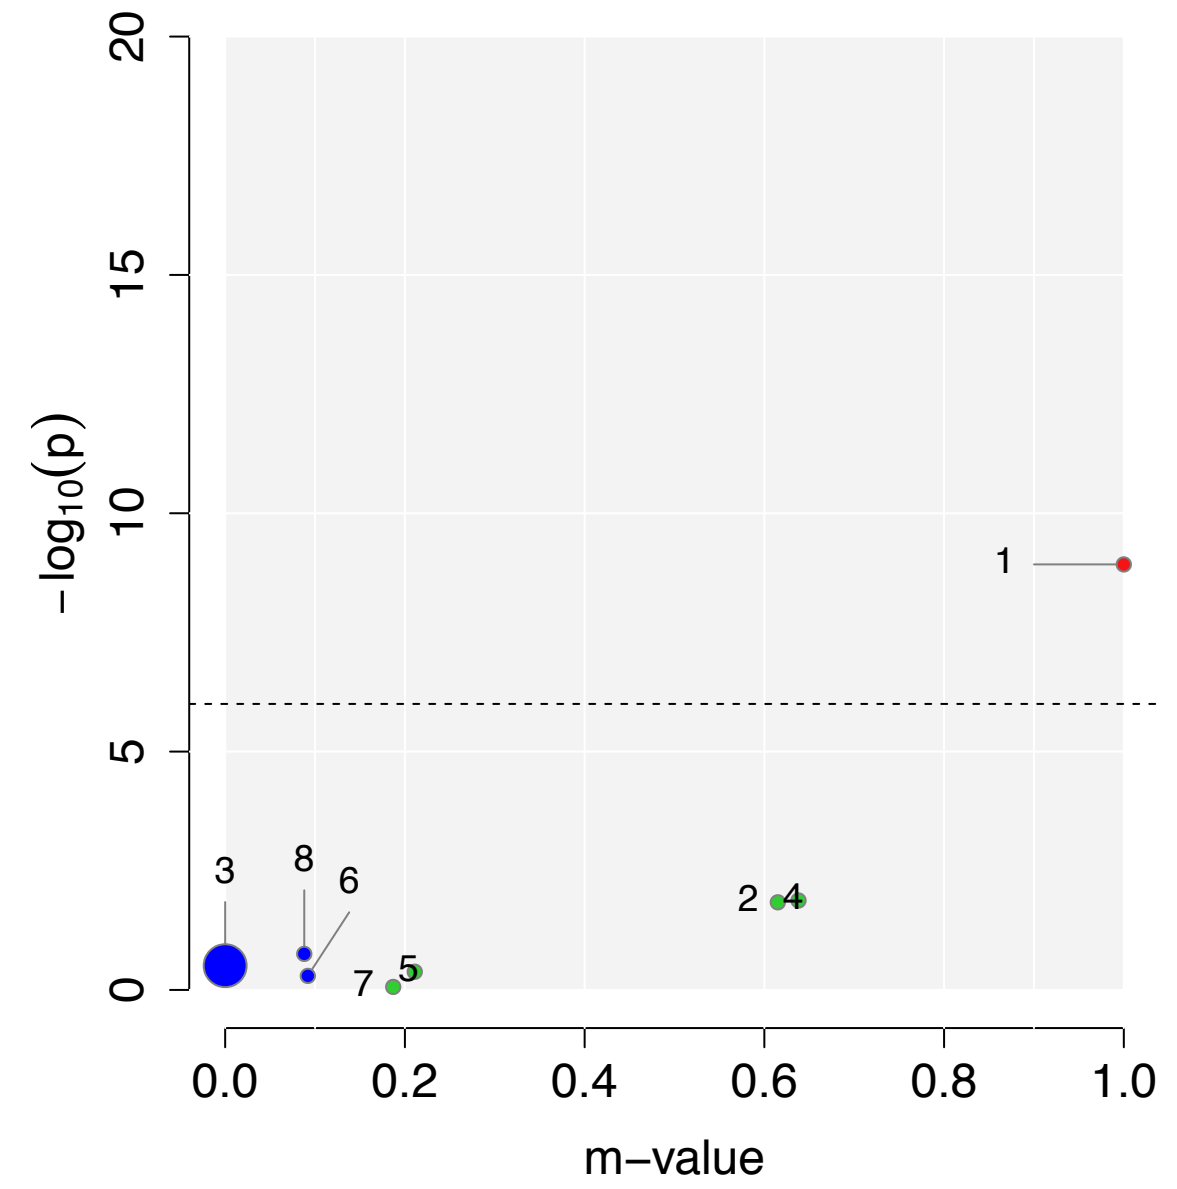

# rs71395455 (Meta $P = 5.43 \times 10^{-14}$ )

Gene : **ZSCAN2**, **WDR73**

## GWAS P-value

- $2.30 \times 10^{-9}$  ● 1.SCZ
- $1.87 \times 10^{-8}$  ● 2.BIP
- 0.0079 ● 3.MD
- 0.0007 ● 4.ASD
- 0.4803 ● 5.ADHD
- 0.4105 ● 6.TS
- 0.9922 ● 7.ANO
- 0.9341 ● 8.OCD

FE summary

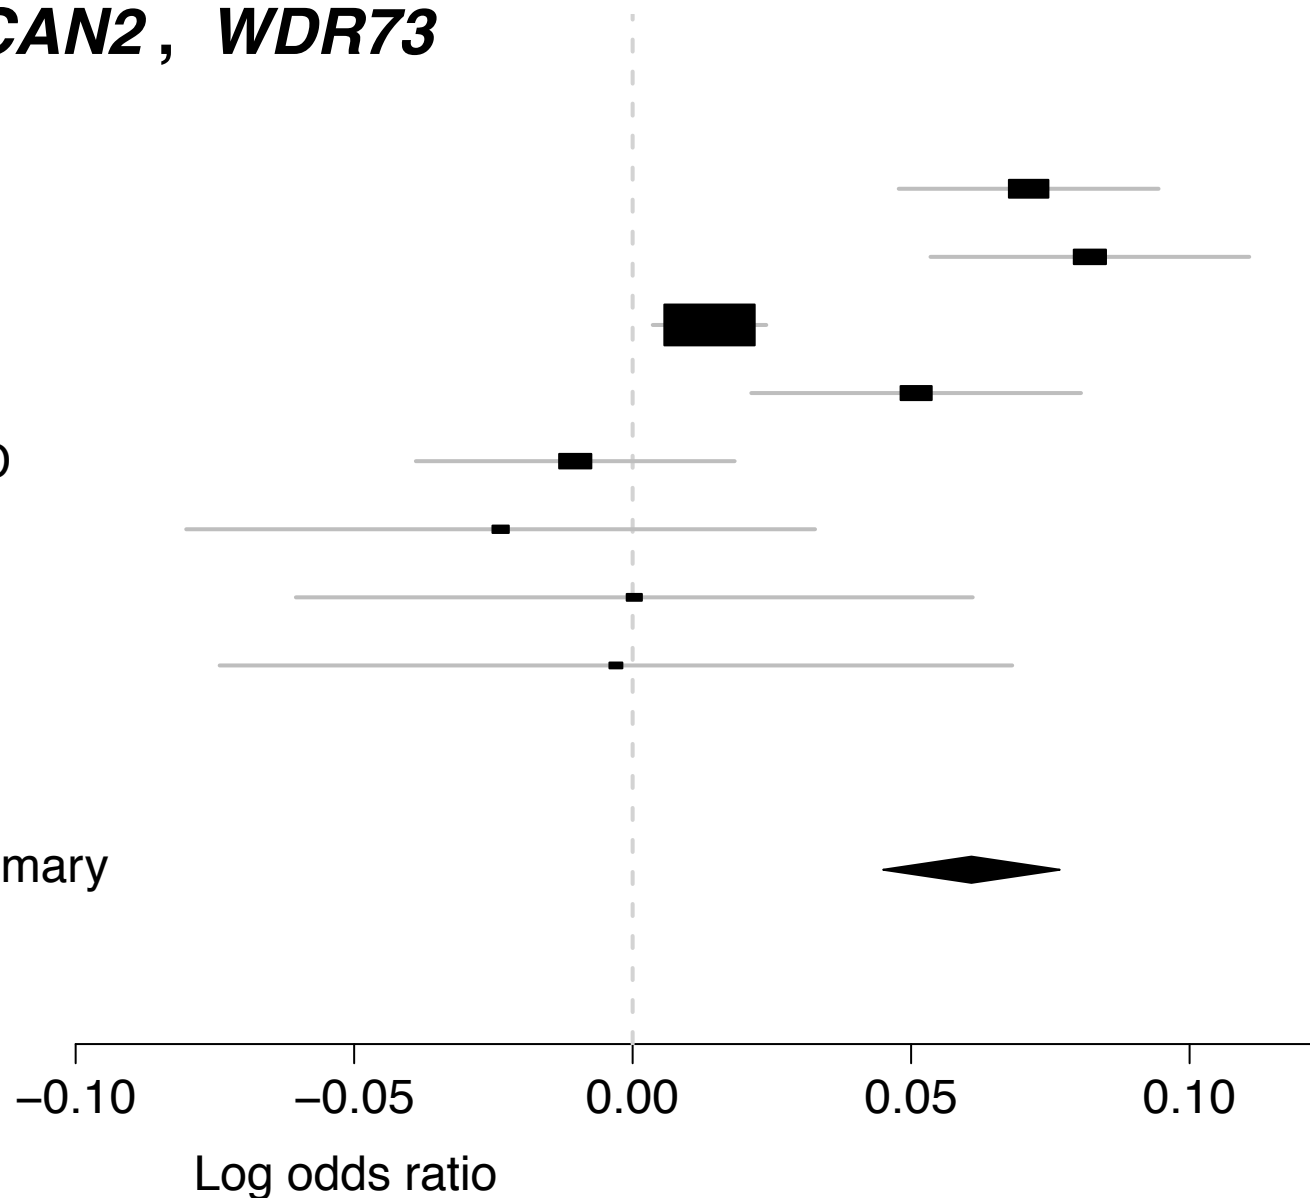

## PM-Plot

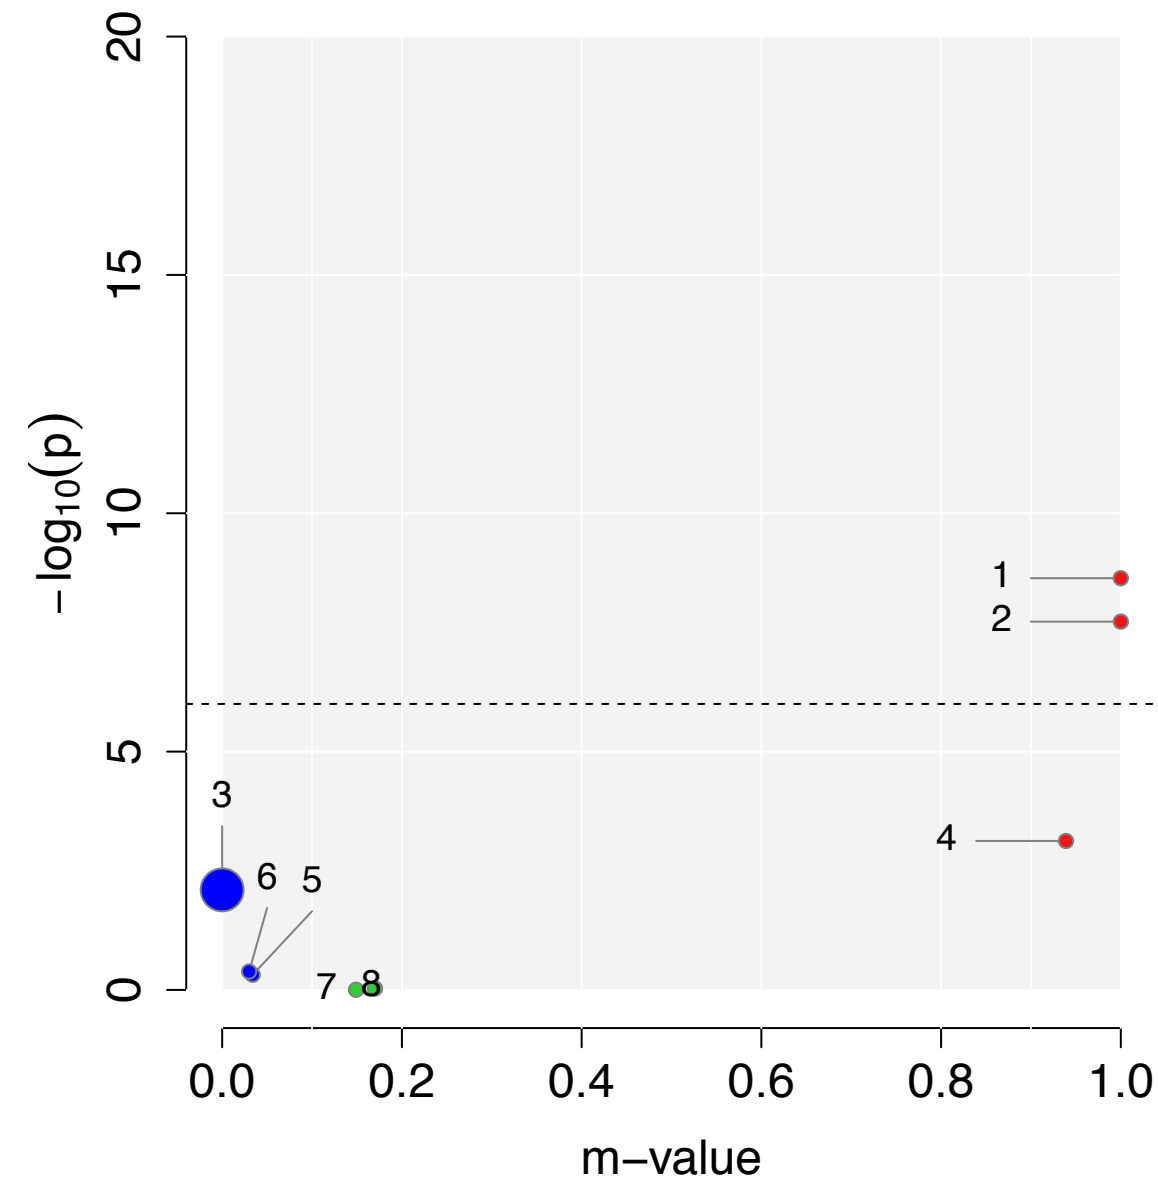

# rs75059851 (Meta $P = 5.85 \times 10^{-10}$ )

Gene : *IGSF9B*

## GWAS P-value

- 1.90 x 10<sup>-11</sup> ● 1.SCZ
- 0.1245 ● 2.BIP
- 0.6802 ● 3.MD
- 0.7897 ● 4.ASD
- 0.0292 ● 5.ADHD
- 0.9859 ● 6.TS
- 0.0443 ● 7.ANO
- 0.6261 ● 8.OCD

FE summary

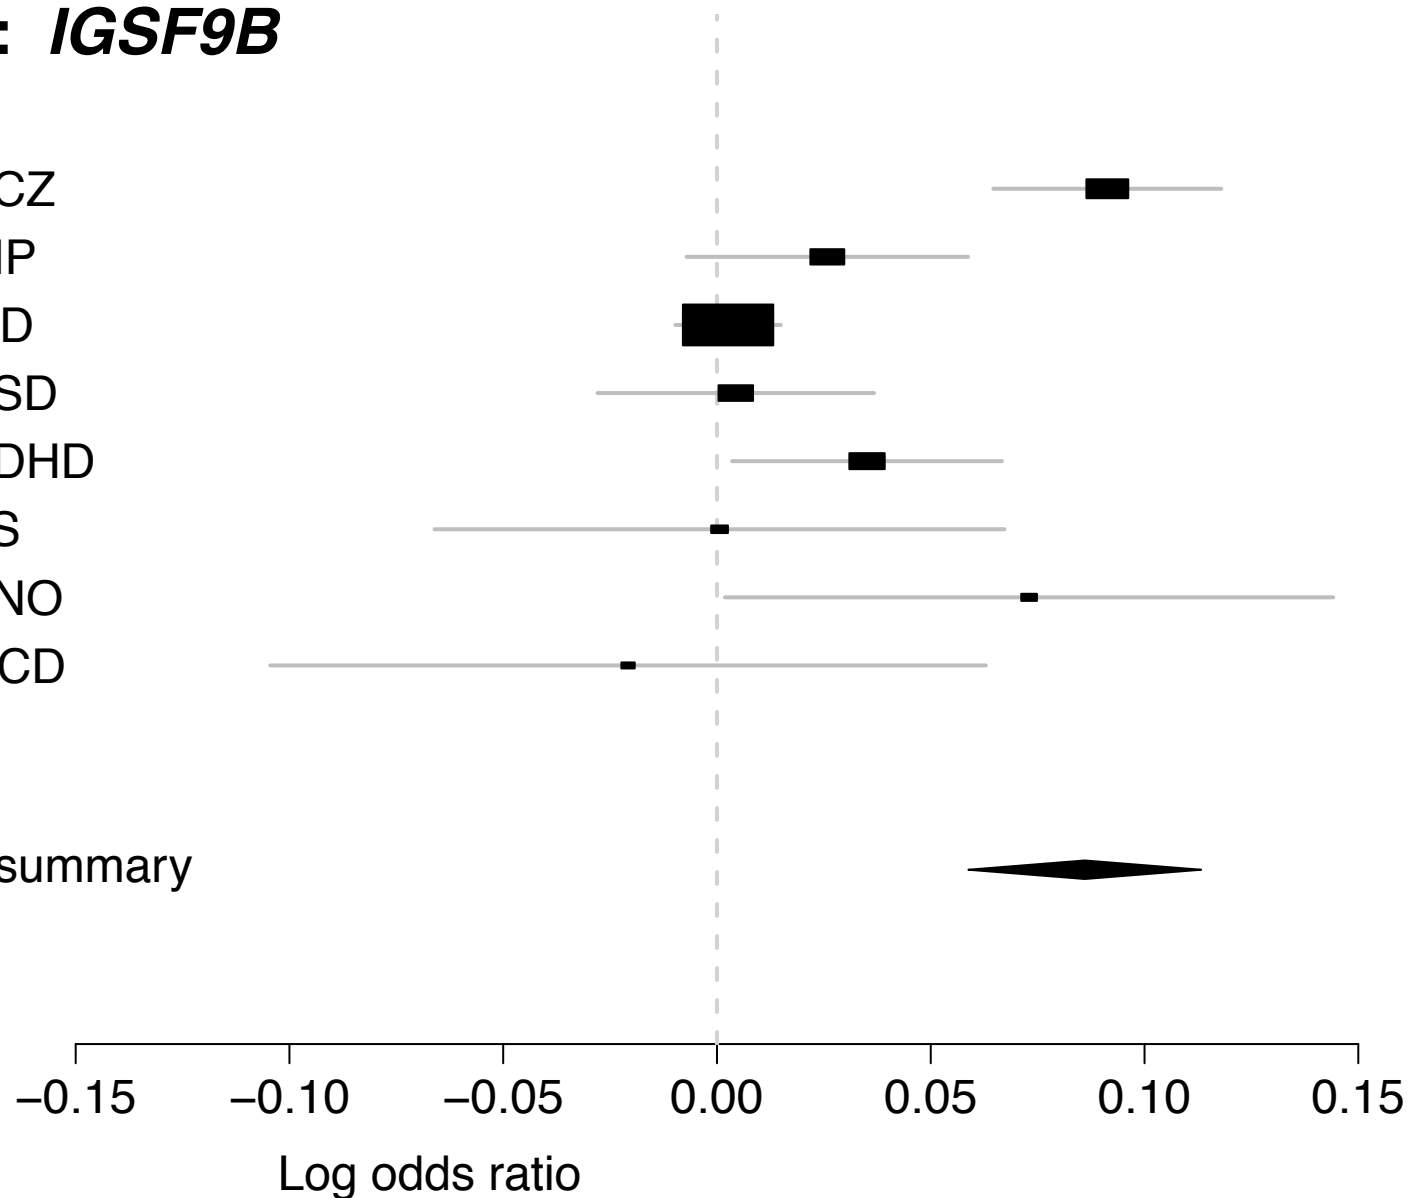

## PM-Plot

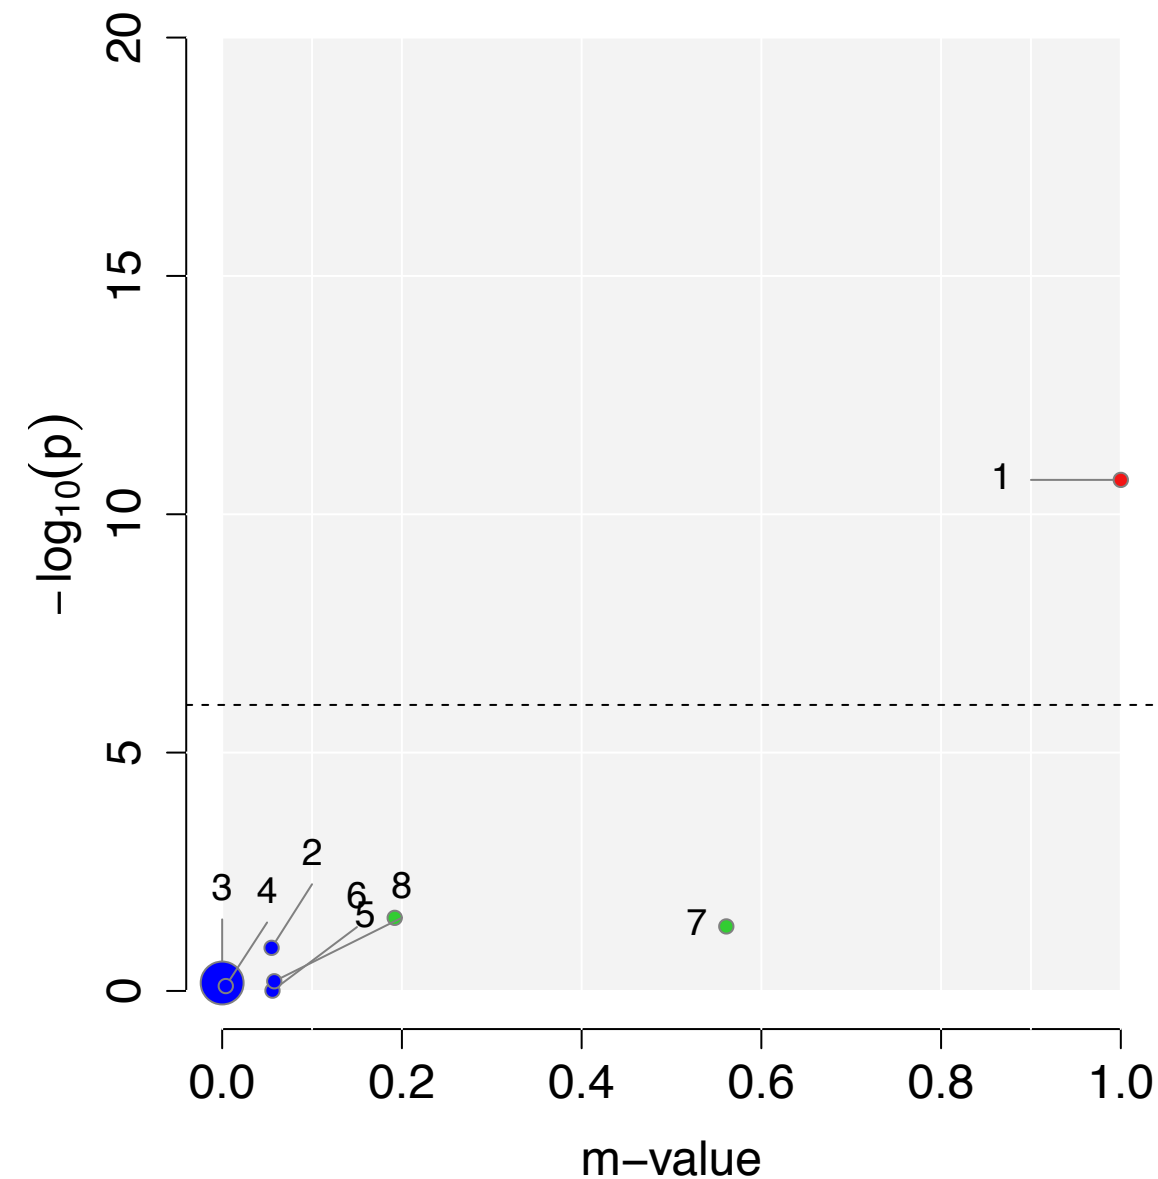



rs77135925 (Meta  $P = 7.73 \times 10^{-9}$ )

Gene : *MYO18A*, *CRYBA1*

GWAS P-value

- 0.6369 ● 1.SCZ
- 0.0040 ● 2.BIP
- $9.92 \times 10^{-9}$  ● 3.MD
- 0.4653 ● 4.ASD
- 0.3377 ● 5.ADHD
- 0.7981 ● 6.TS
- 0.0303 ● 7.ANO
- 0.3456 ● 8.OCD

FE summary

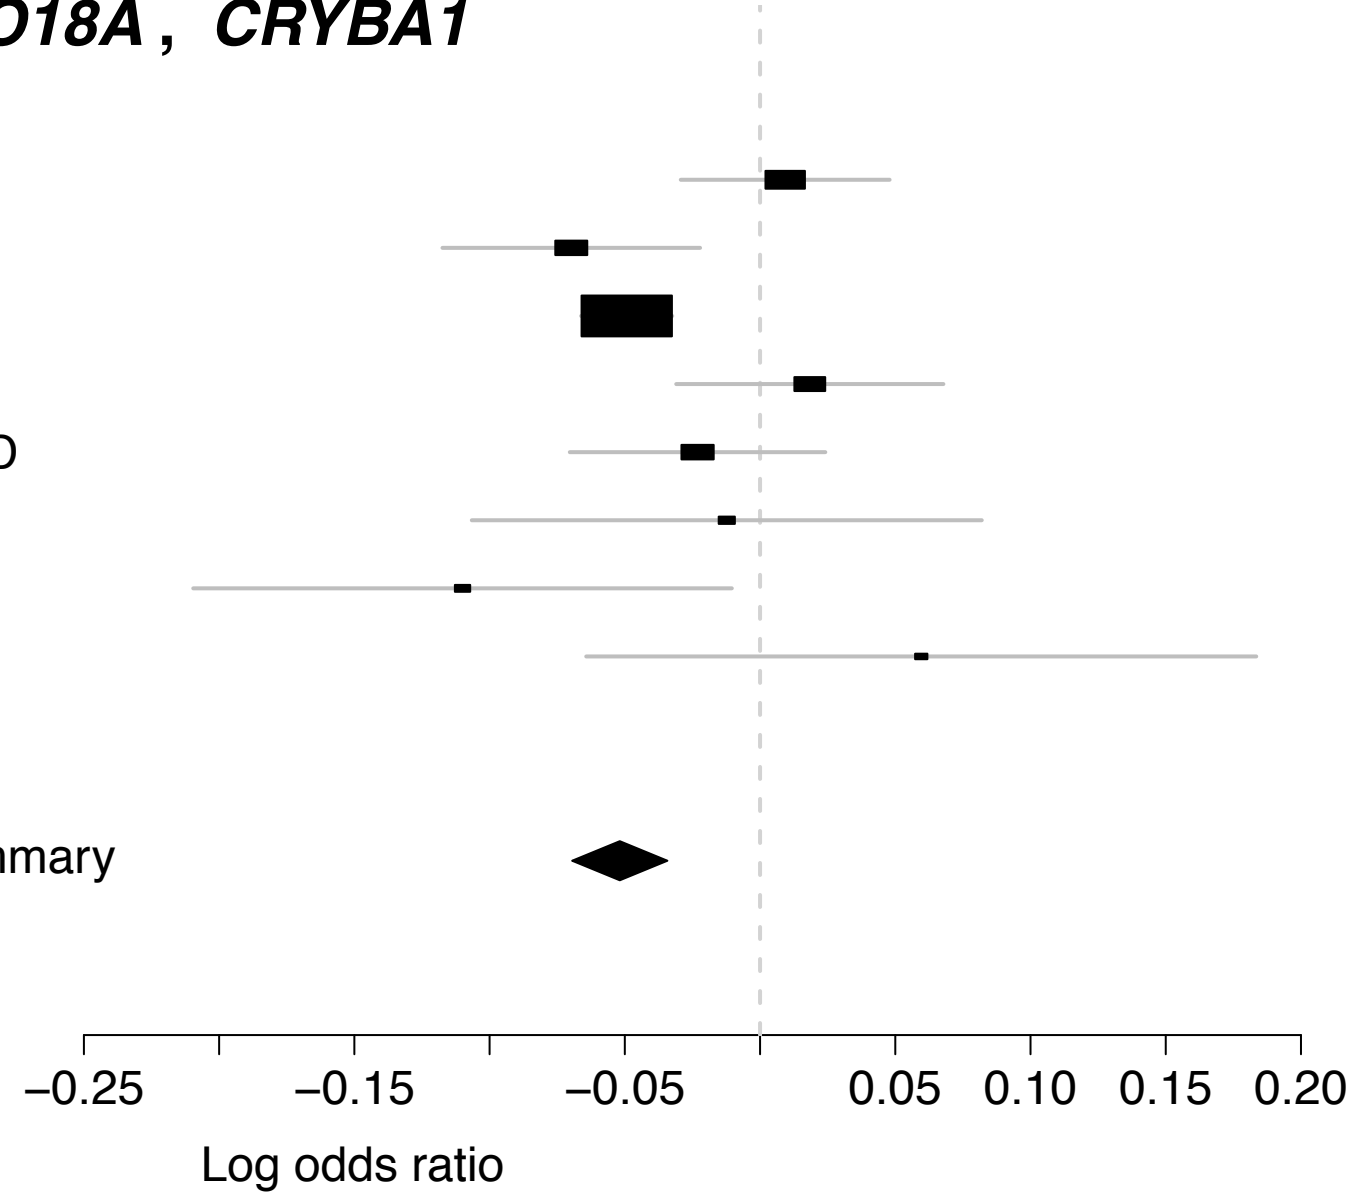

PM-Plot

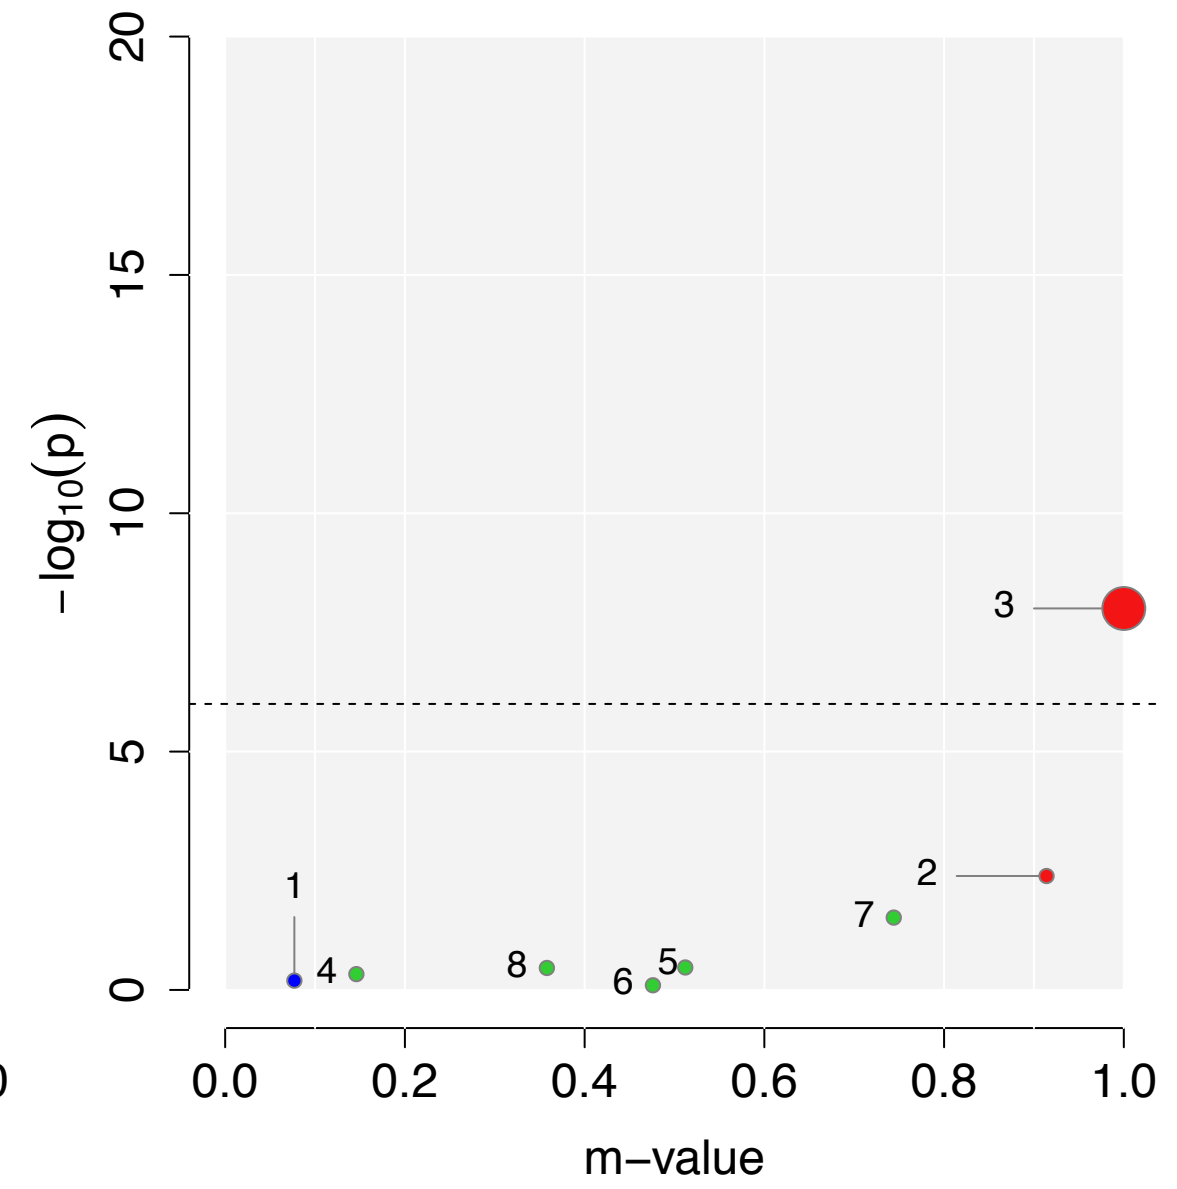

# rs78337797 (Meta $P = 4.98 \times 10^{-8}$ )

Gene : **SOX5**

## GWAS P-value

- 0.0004 ● 1.SCZ
- 0.0281 ● 2.BIP
- $4.68 \times 10^{-6}$  ● 3.MD
- 0.0096 ● 4.ASD
- 0.1656 ● 5.ADHD
- 0.2353 ● 6.TS
- 0.9478 ● 7.ANO
- 0.6796 ● 8.OCD

FE summary

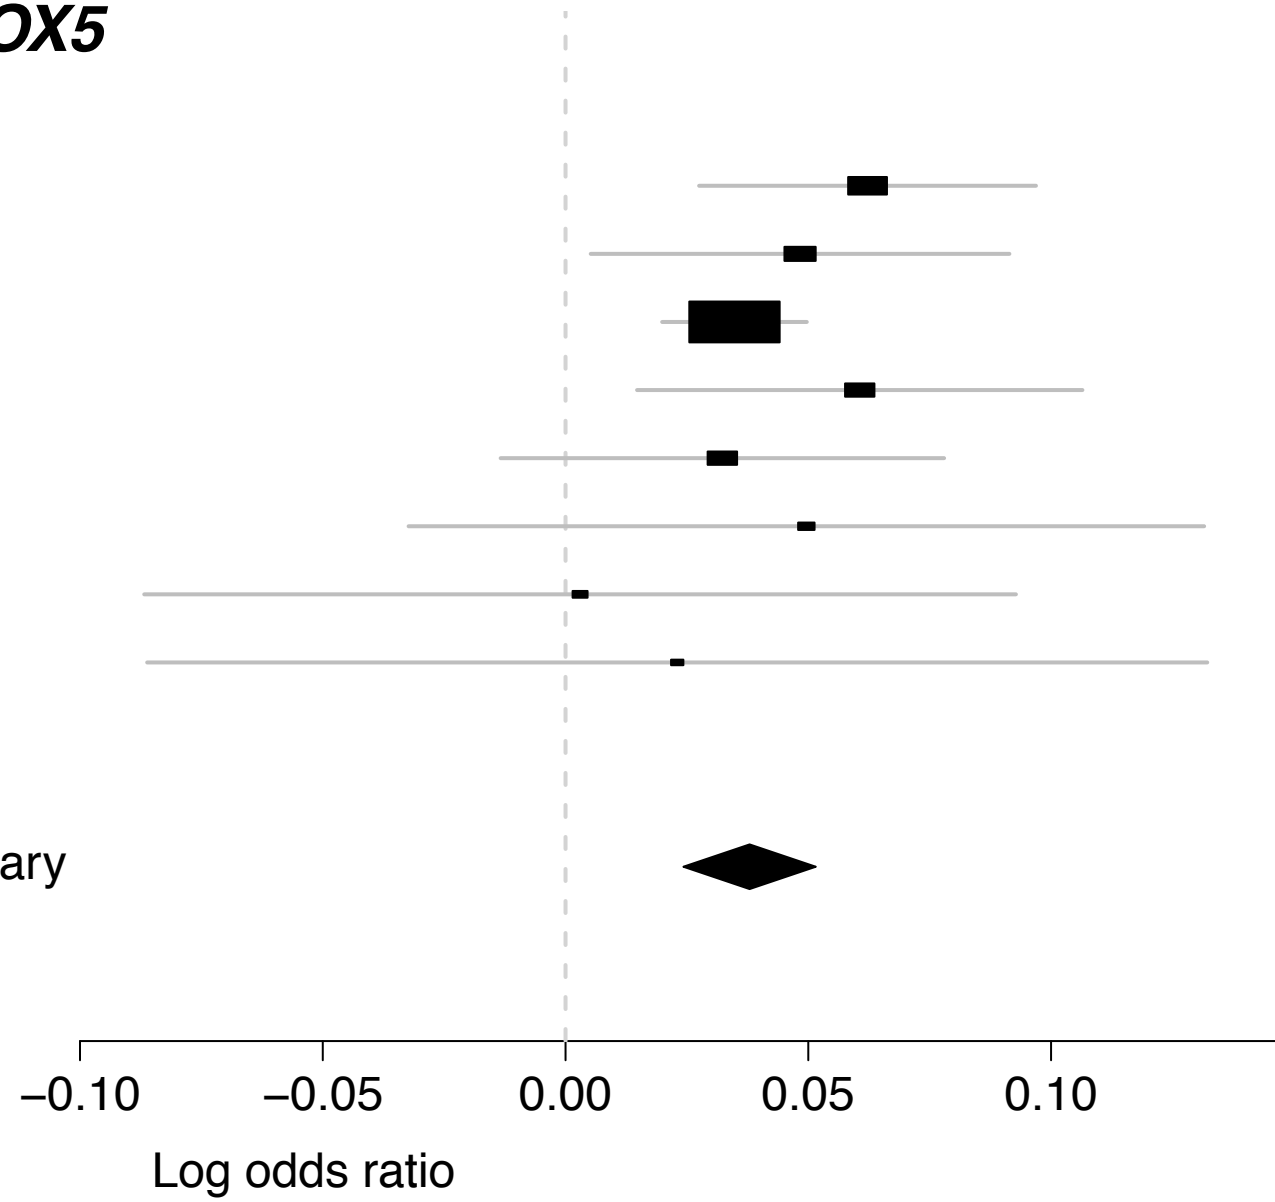

## PM-Plot

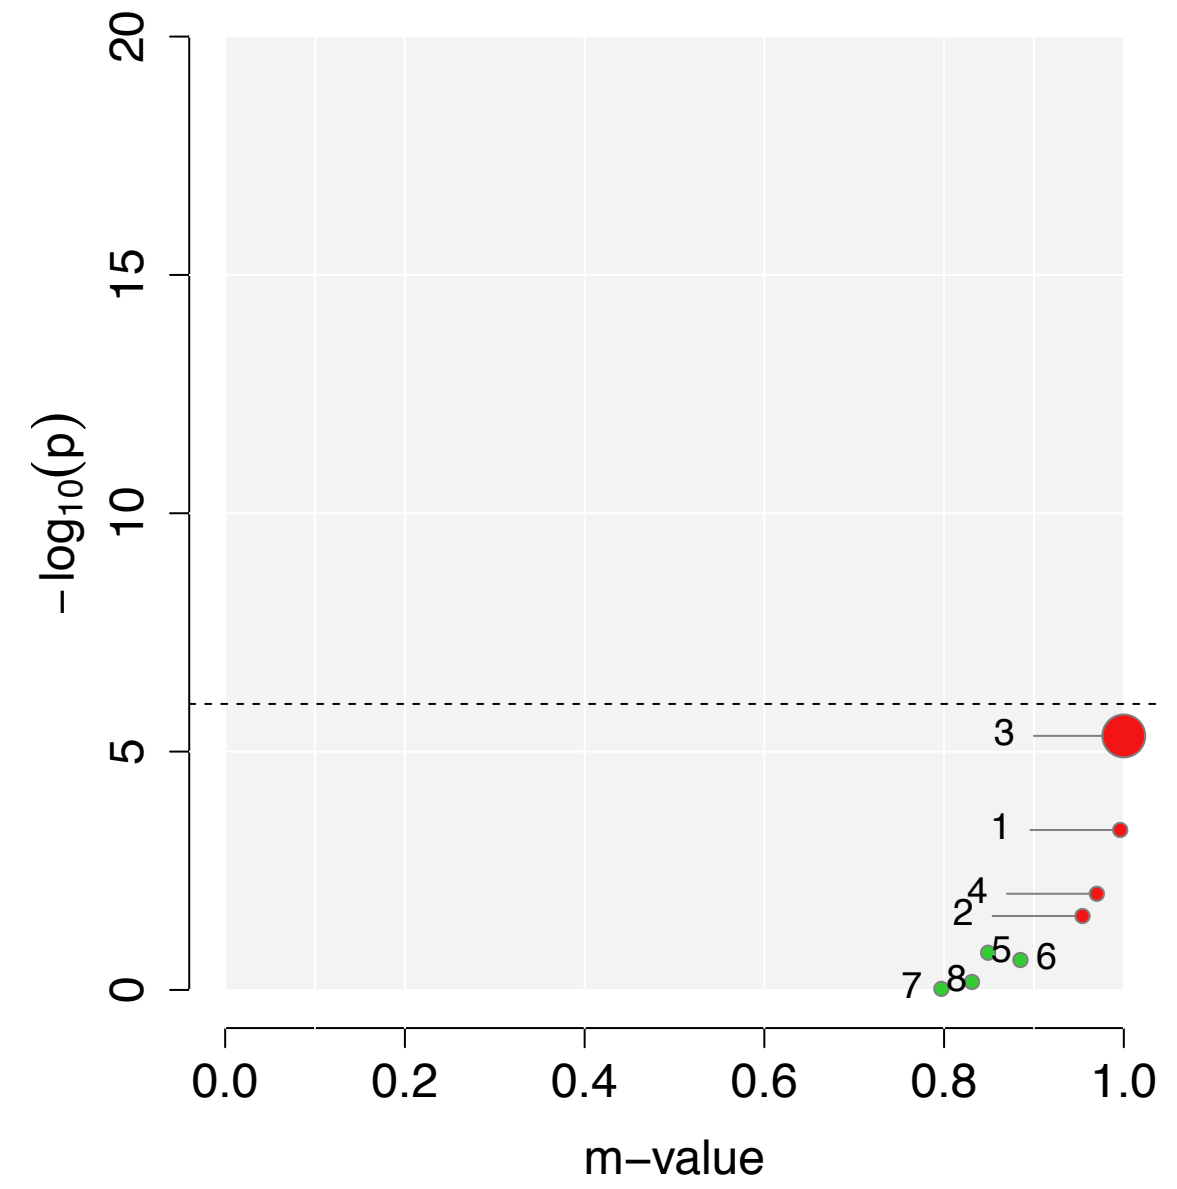

# rs79879286 (Meta $P = 7.21 \times 10^{-11}$ )

Gene : *OSBPL3*, *DFNA5*

## GWAS P-value

- 1.96 x 10<sup>-5</sup> ● 1.SCZ
- 4.51 x 10<sup>-6</sup> ● 2.BIP
- 8.76 x 10<sup>-7</sup> ● 3.MD
- 0.0150 ● 4.ASD
- 0.0705 ● 5.ADHD
- 0.7519 ● 6.TS
- 0.3620 ● 7.ANO
- 0.5698 ● 8.OCD

FE summary

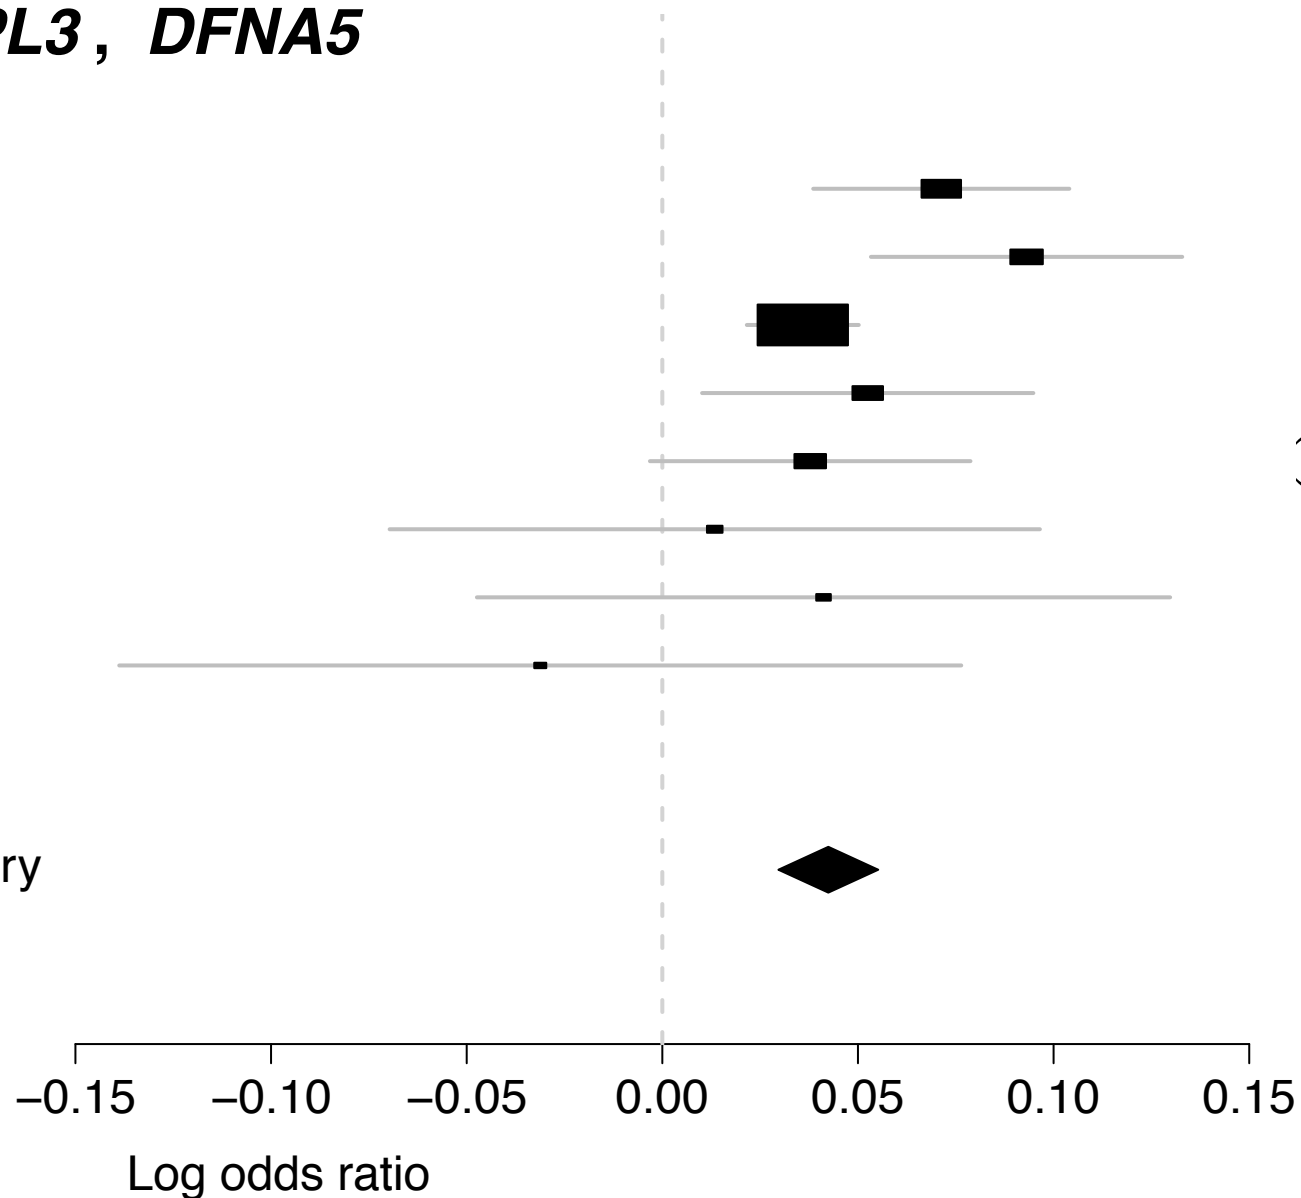

## PM-Plot

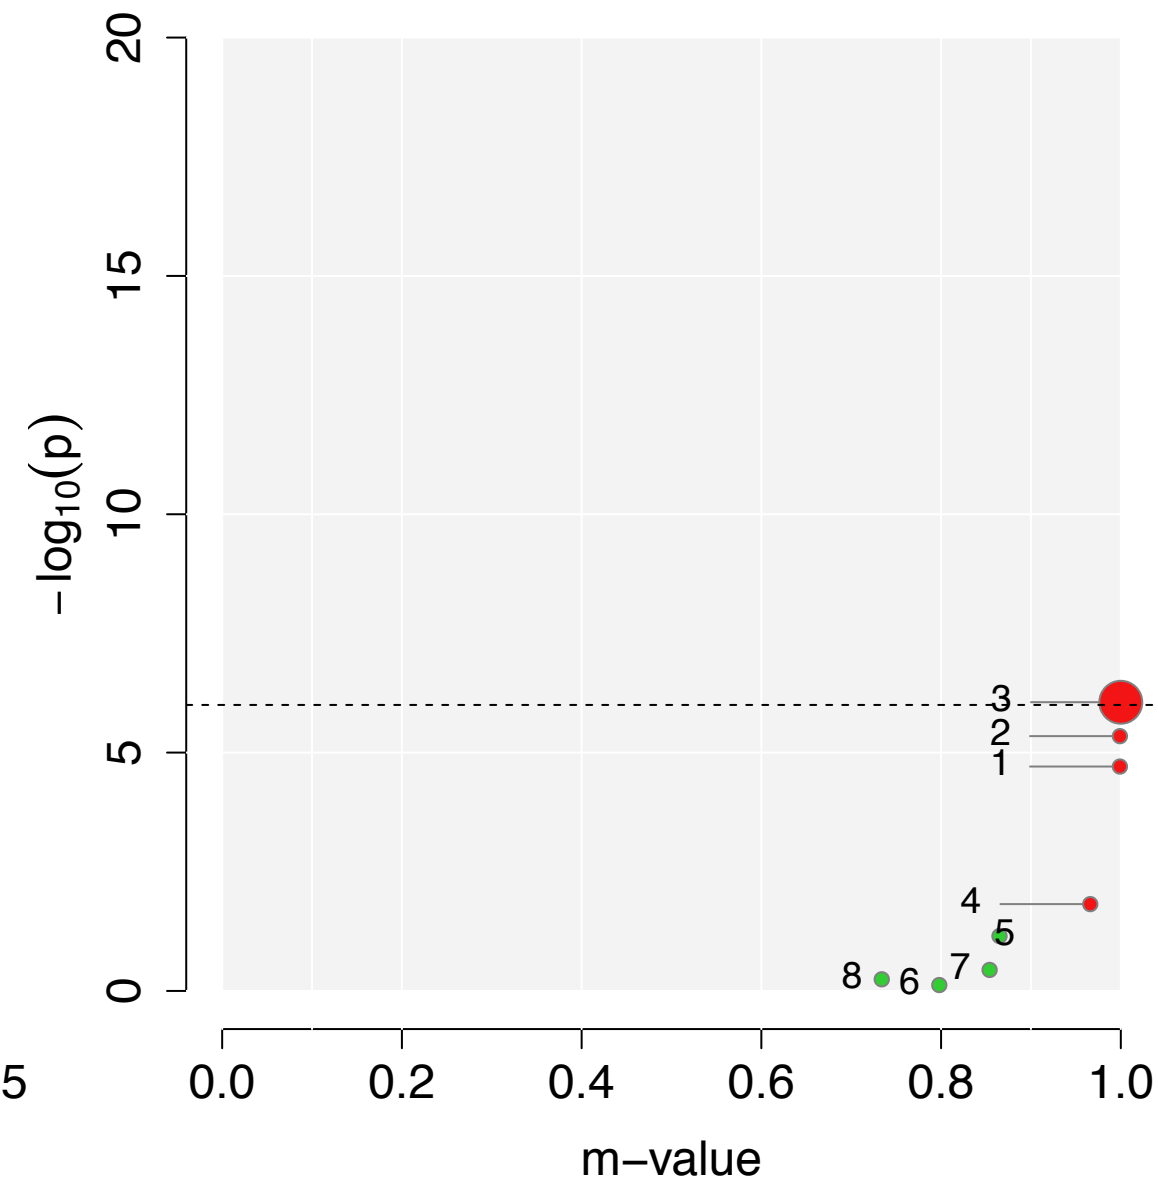

# rs80256351 (Meta $P = 2.56 \times 10^{-9}$ )

Gene : (>200kb)

## GWAS P-value

- $3.51 \times 10^{-7}$  ● 1.SCZ
- $1.15 \times 10^{-7}$  ● 2.BIP
- 0.0747 ● 3.MD
- 0.5343 ● 4.ASD
- 0.5287 ● 5.ADHD
- 0.4262 ● 6.TS
- 0.9292 ● 7.ANO
- 0.4587 ● 8.OCD

FE summary

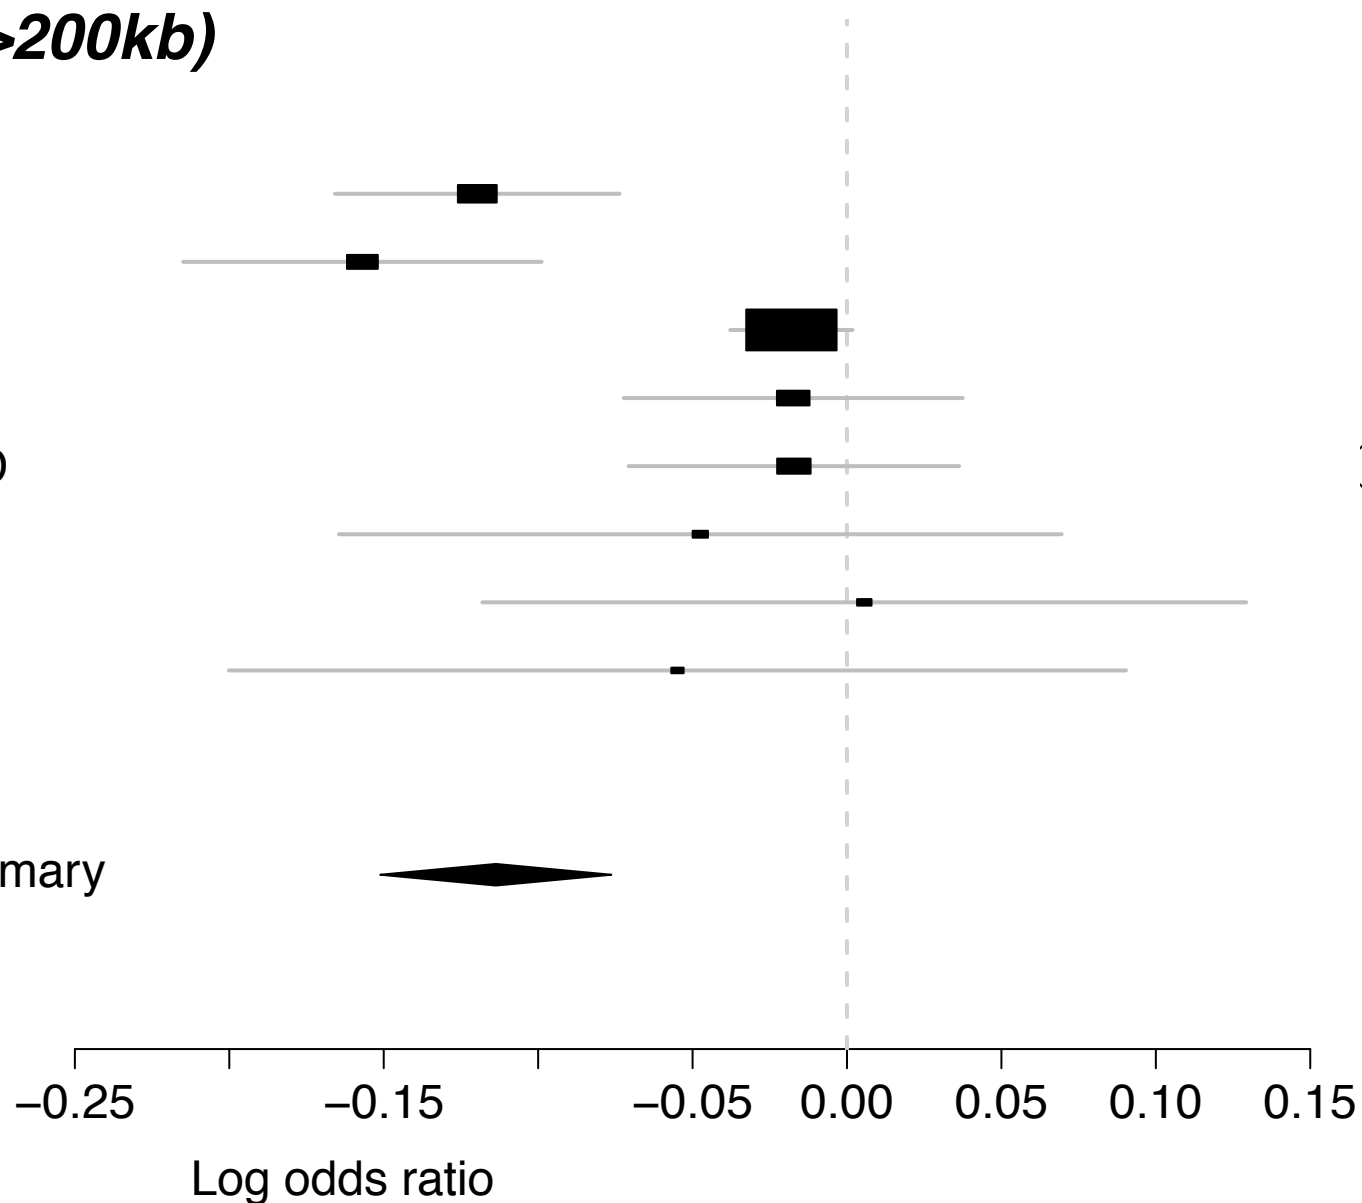

## PM-Plot

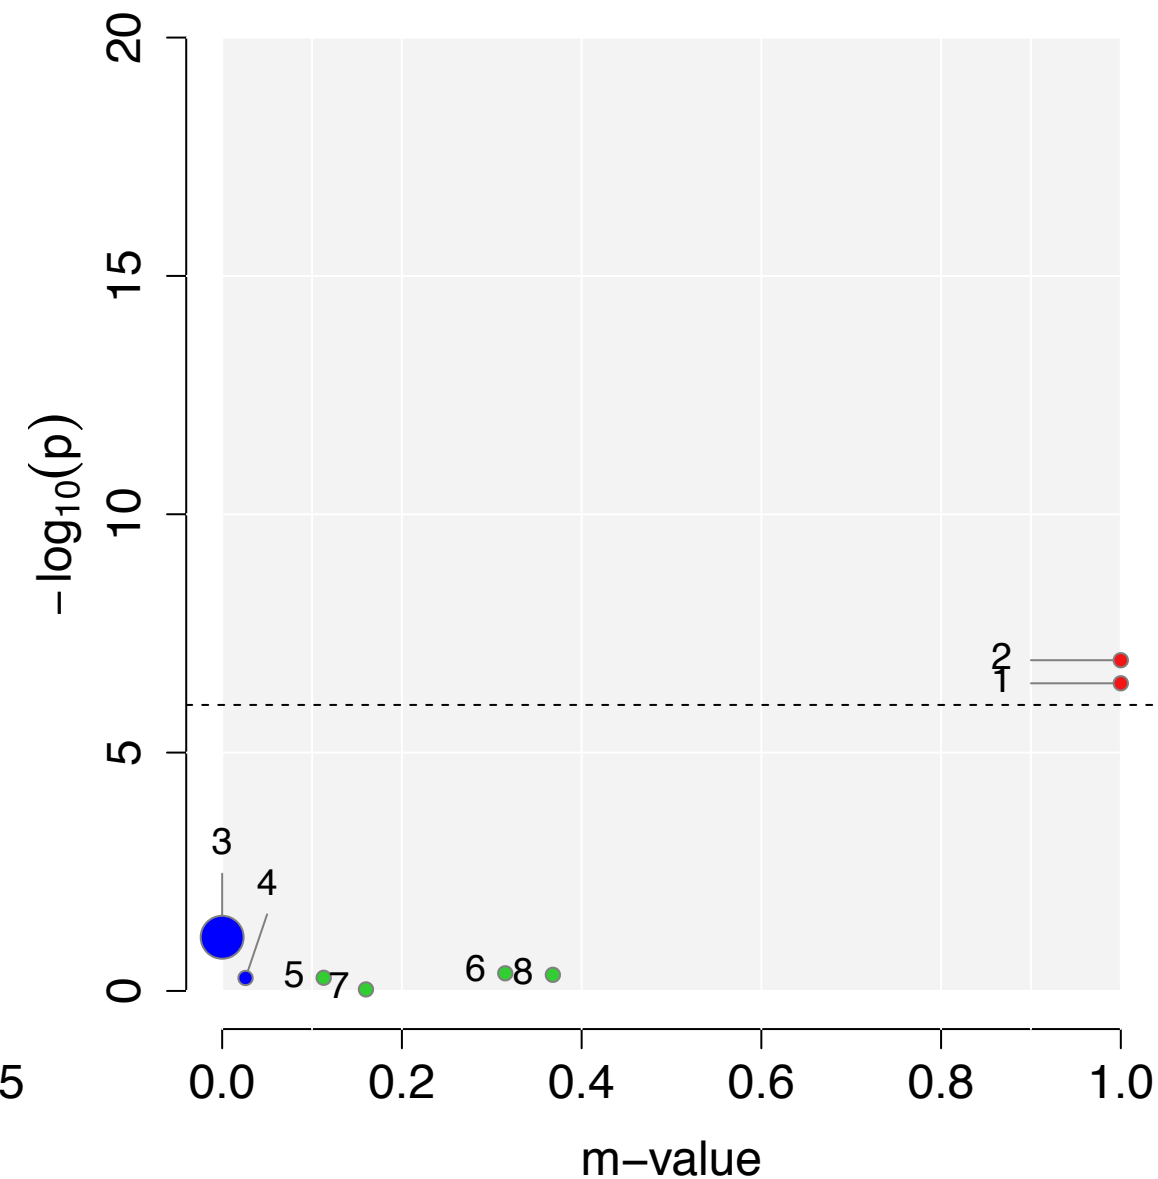

# rs80318442 (Meta $P = 4.03 \times 10^{-12}$ )

Gene : (>200kb)

## GWAS P-value

- 2.65 x 10<sup>-6</sup> ● 1.SCZ
- 9.20 x 10<sup>-5</sup> ● 2.BIP
- 0.2222 ● 3.MD
- 0.2241 ● 4.ASD
- 2.62 x 10<sup>-8</sup> ● 5.ADHD
- 0.9884 ● 6.TS
- 0.0619 ● 7.ANO
- 0.8721 ● 8.OCD

FE summary

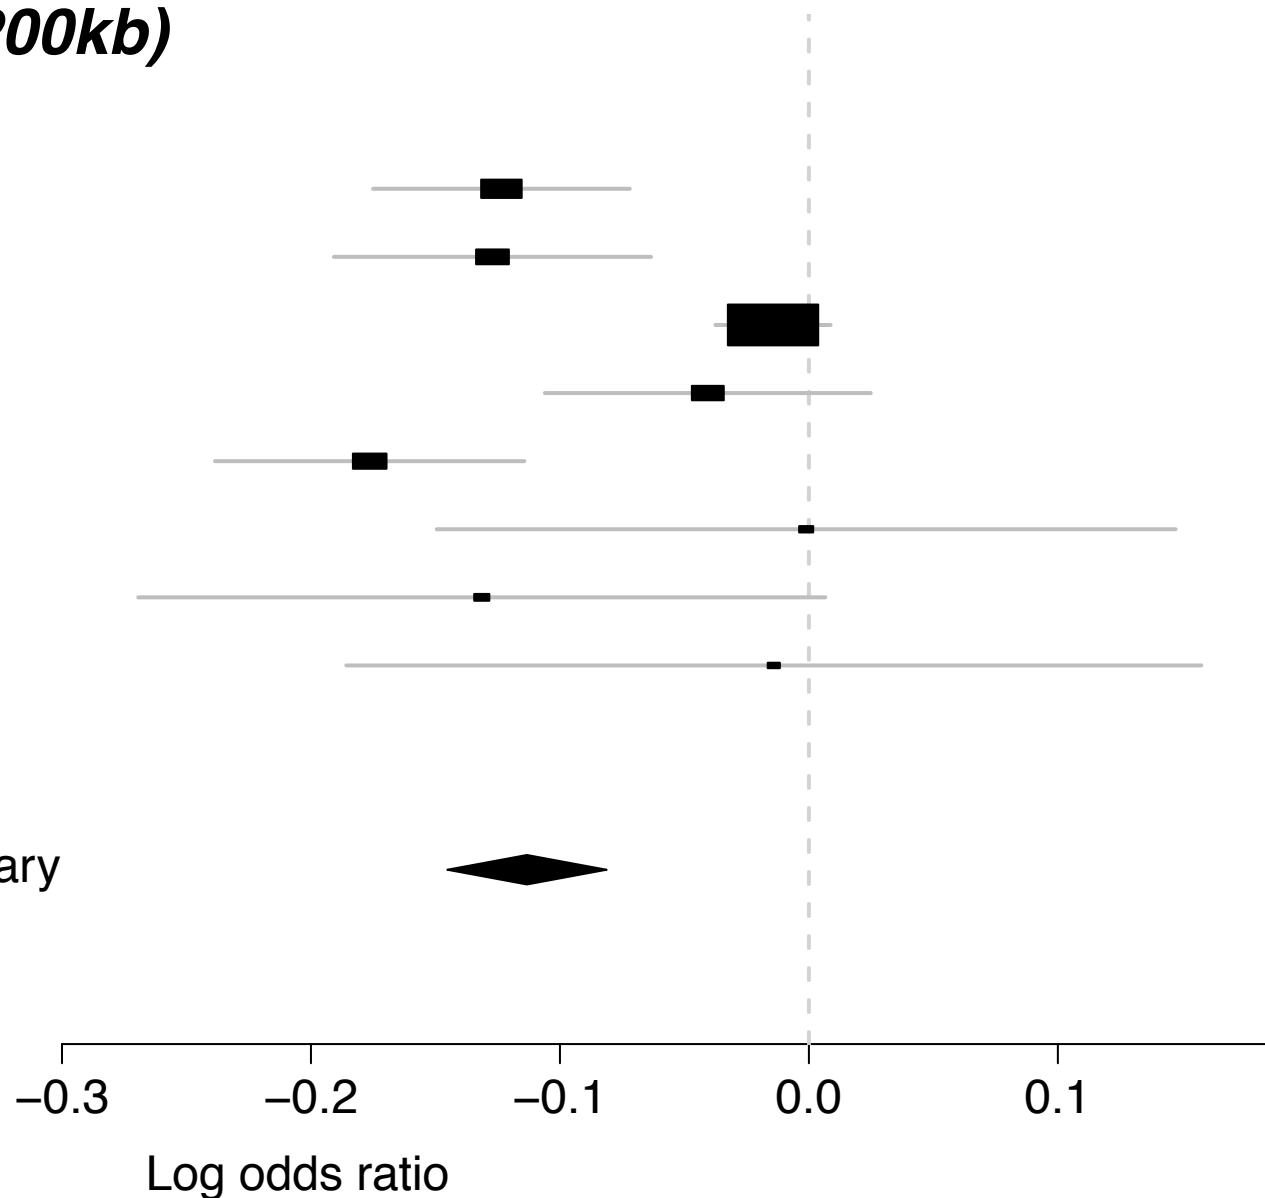

## PM-Plot

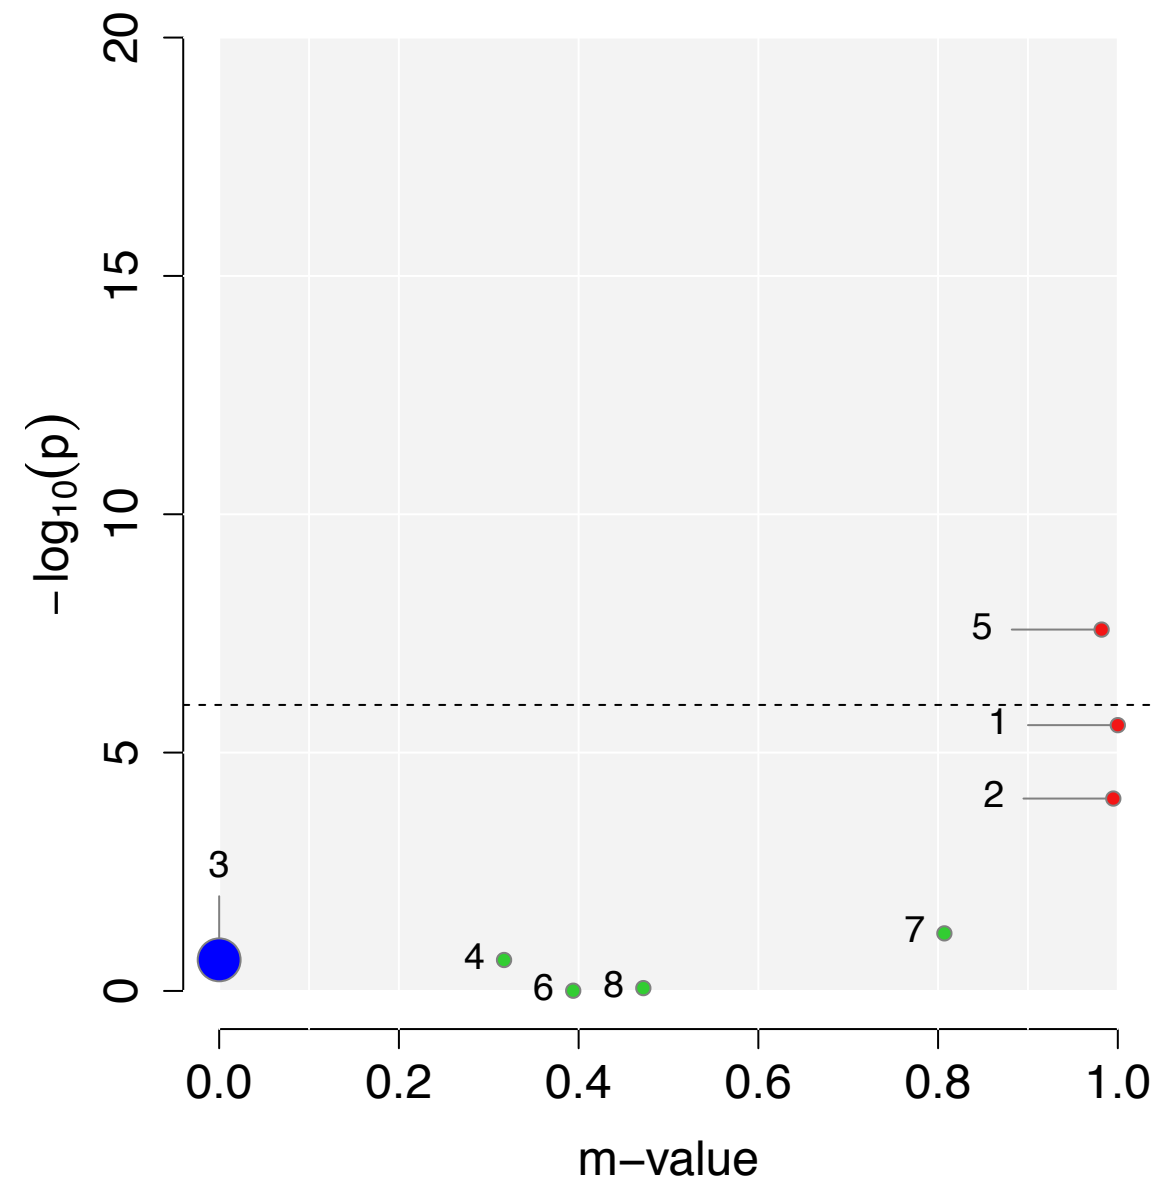

# rs111294930 (Meta $P = 2.77 \times 10^{-10}$ )

Gene : (>200kb)

## GWAS P-value

- 8.63 x 10<sup>-10</sup> ● 1.SCZ
- 7.45 x 10<sup>-6</sup> ● 2.BIP
- 0.1012 ● 3.MD
- 0.7809 ● 4.ASD
- 0.3409 ● 5.ADHD
- 0.1137 ● 6.TS
- 0.9047 ● 7.ANO
- 0.3652 ● 8.OCD

FE summary

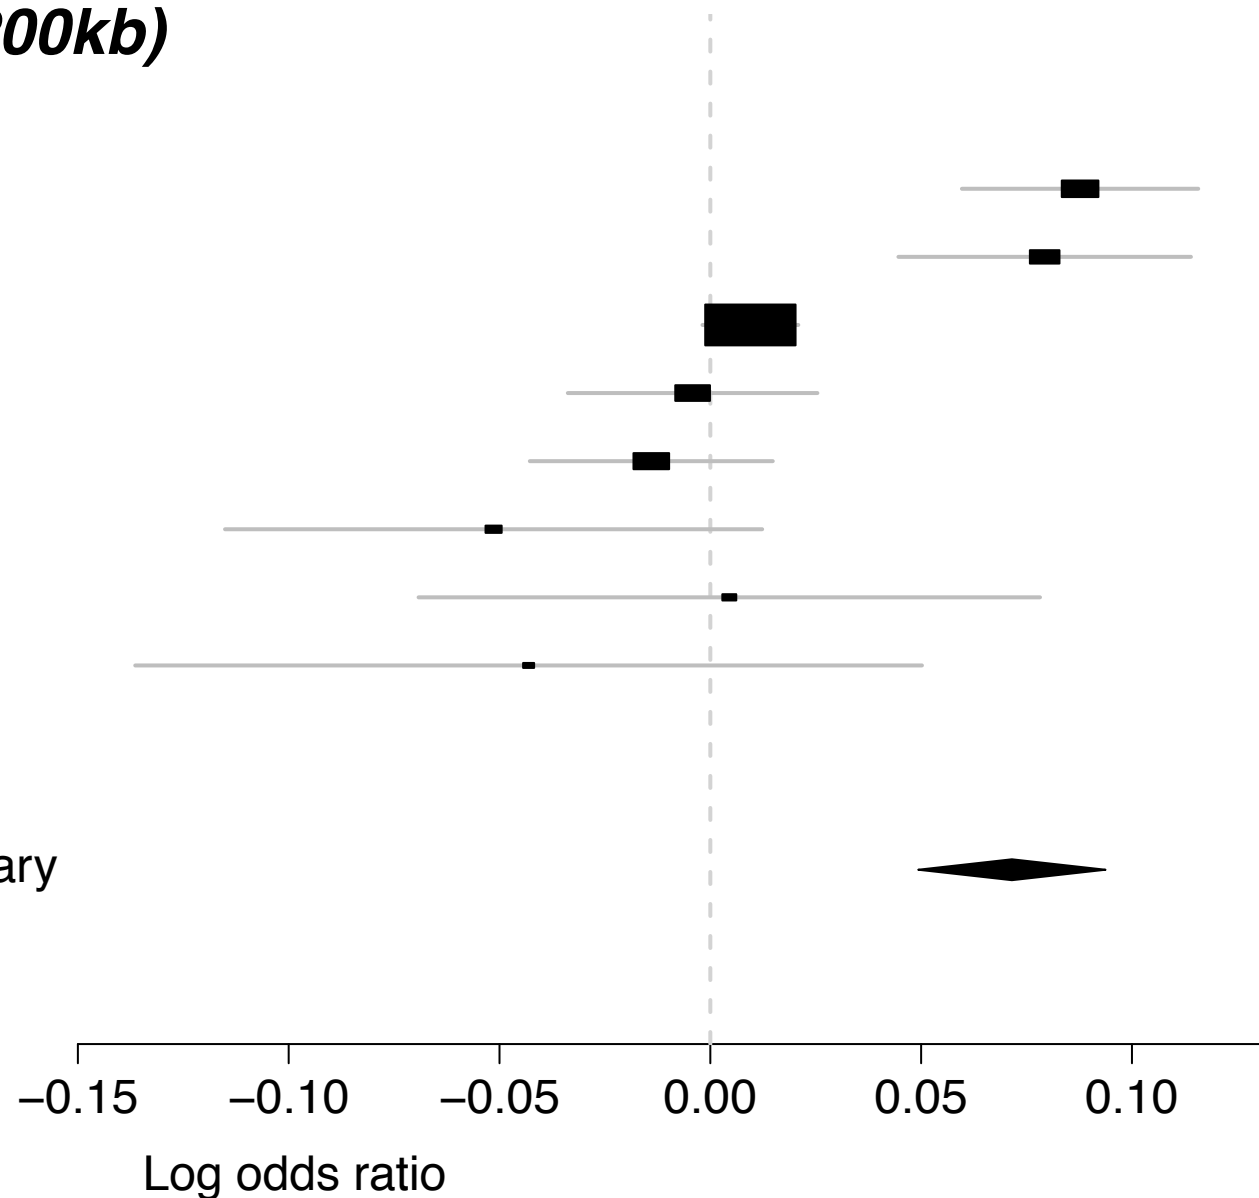

## PM-Plot

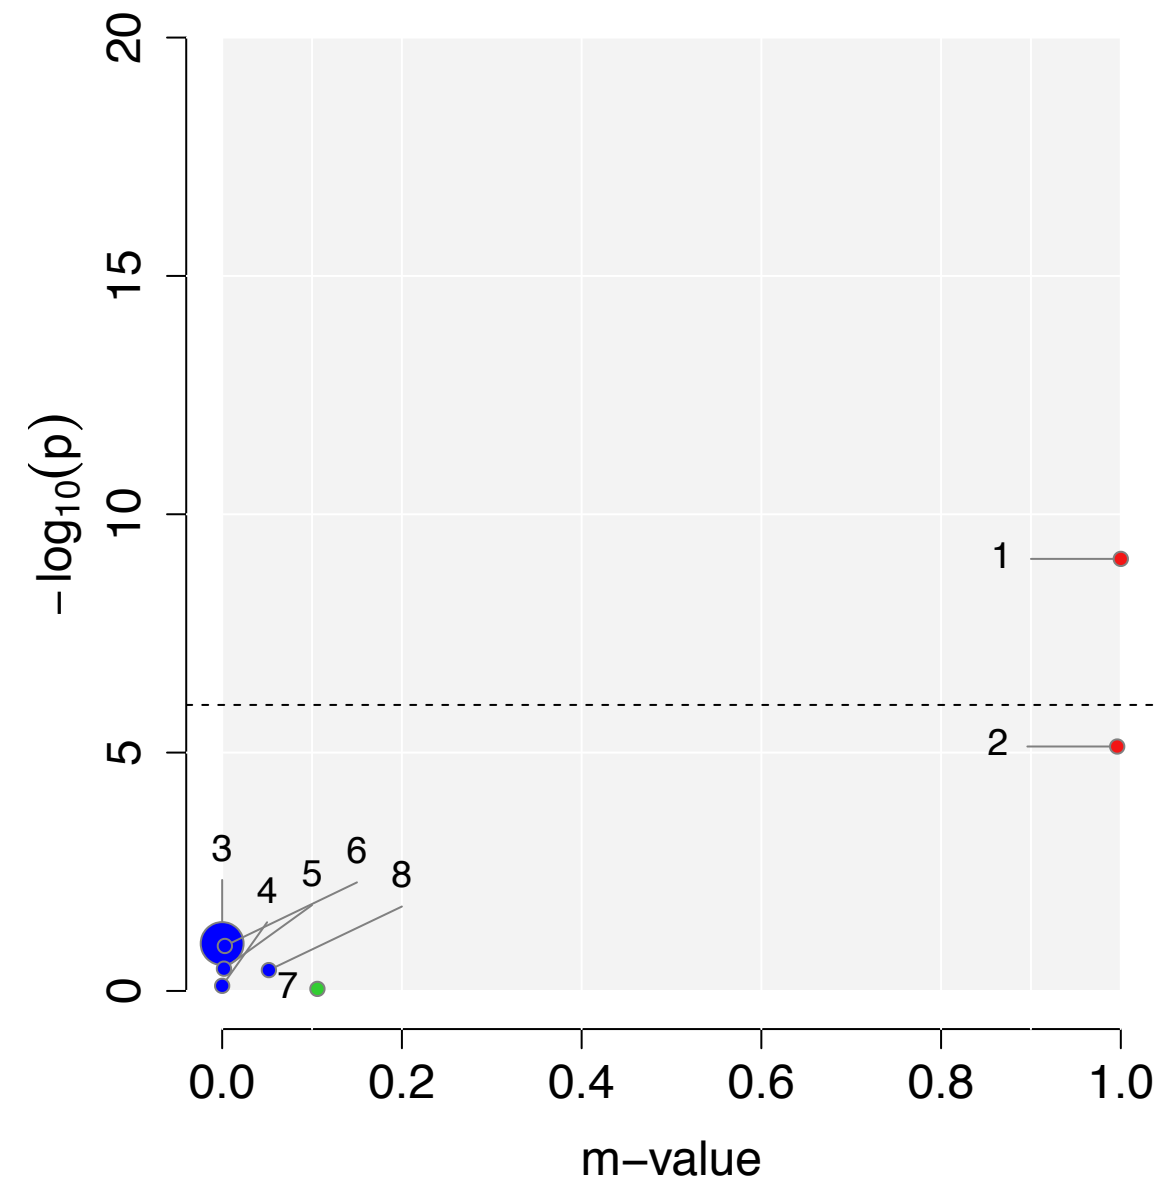

# rs116755193 (Meta $P = 1.04 \times 10^{-8}$ )

Gene : (>200kb)

## GWAS P-value

- 0.1008 ● 1.SCZ
- 0.0323 ● 2.BIP
- $5.20 \times 10^{-9}$  ● 3.MD
- 0.5347 ● 4.ASD
- 0.4221 ● 5.ADHD
- 0.4360 ● 6.TS
- 0.1838 ● 7.ANO
- 0.0740 ● 8.OCD

FE summary

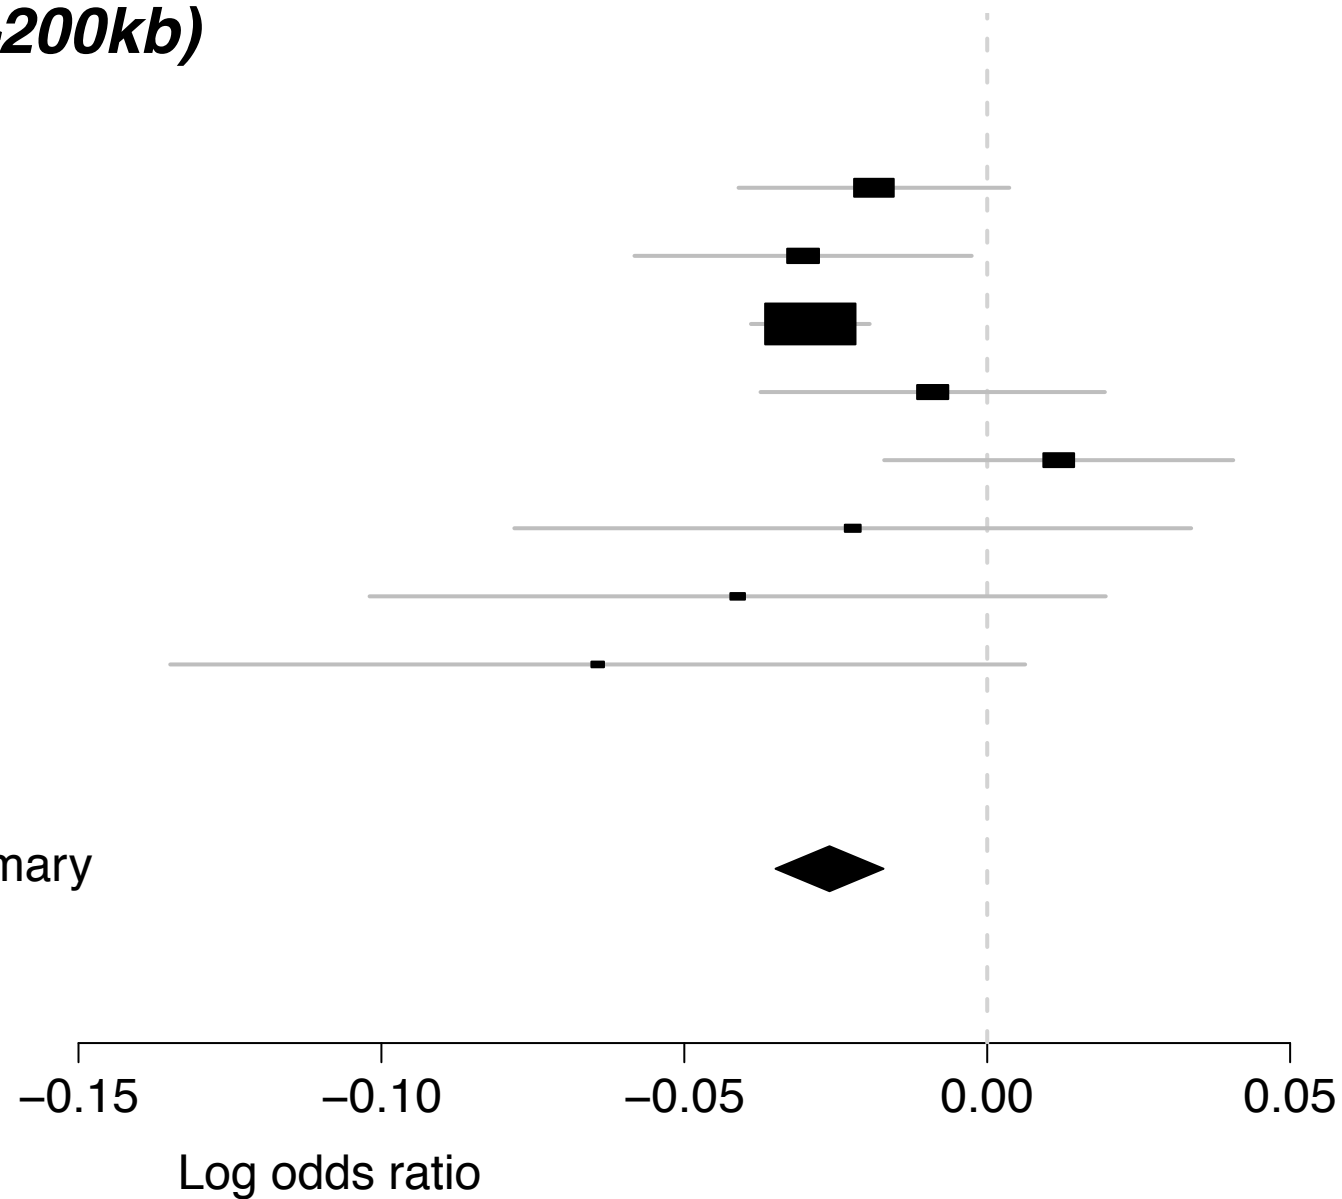

## PM-Plot

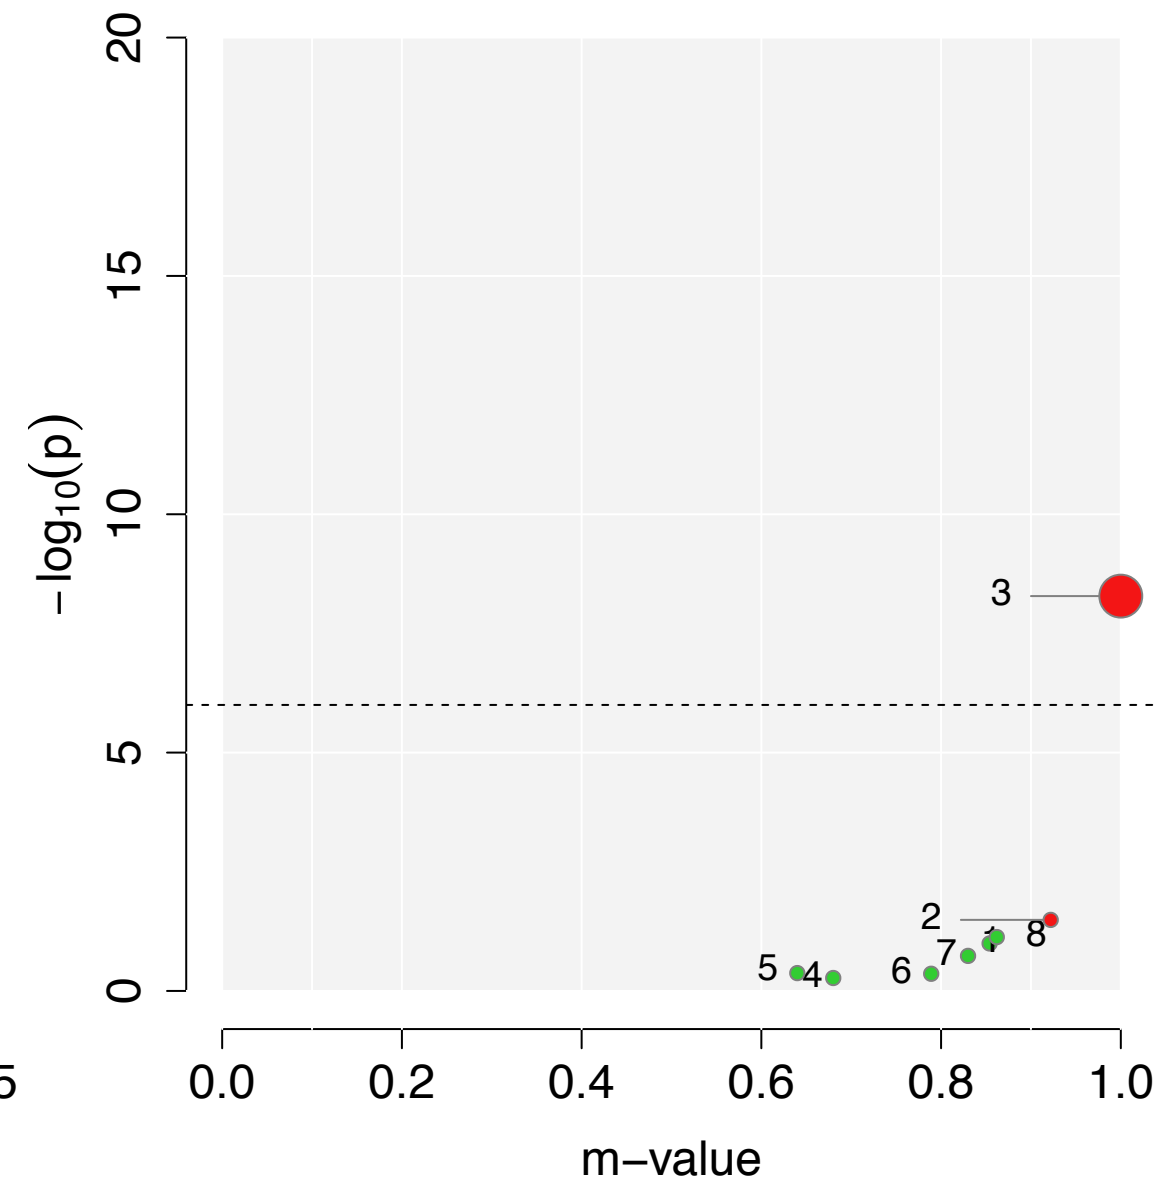

rs117956829 (Meta  $P = 1.82 \times 10^{-9}$ )

Gene : *NOX4*, *FOLH1B*

GWAS P-value

- 0.0002 ● 1.SCZ
- 0.0794 ● 2.BIP
- $3.27 \times 10^{-7}$  ● 3.MD
- 0.0068 ● 4.ASD
- 0.9716 ● 5.ADHD
- 0.6460 ● 6.TS
- 0.0125 ● 7.ANO
- 0.3330 ● 8.OCD

FE summary

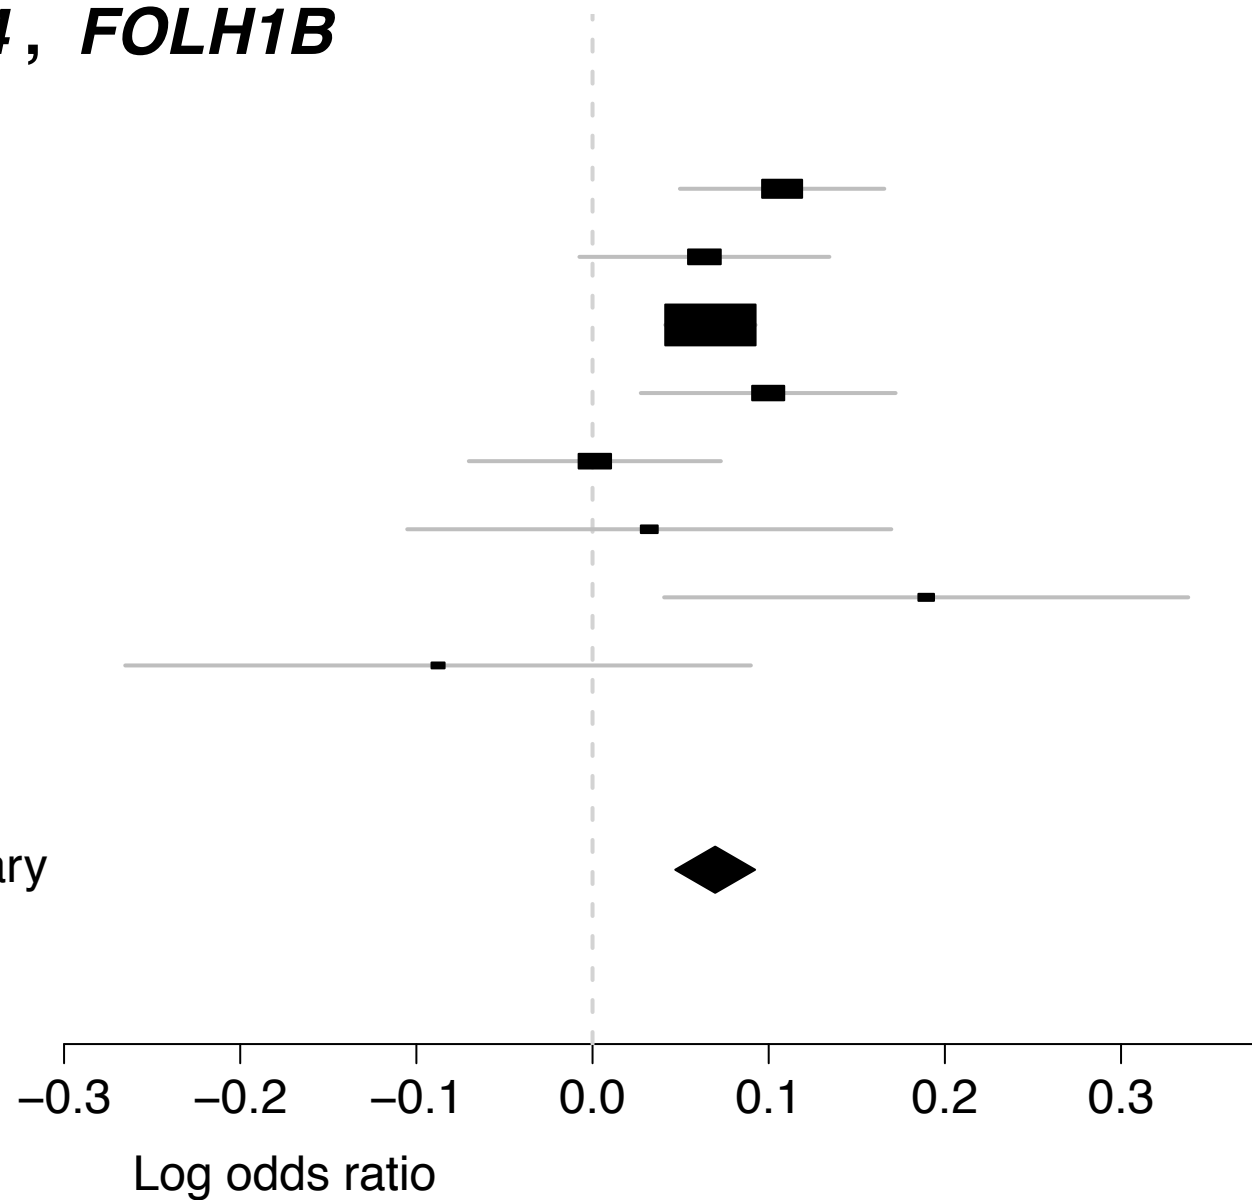

PM-Plot

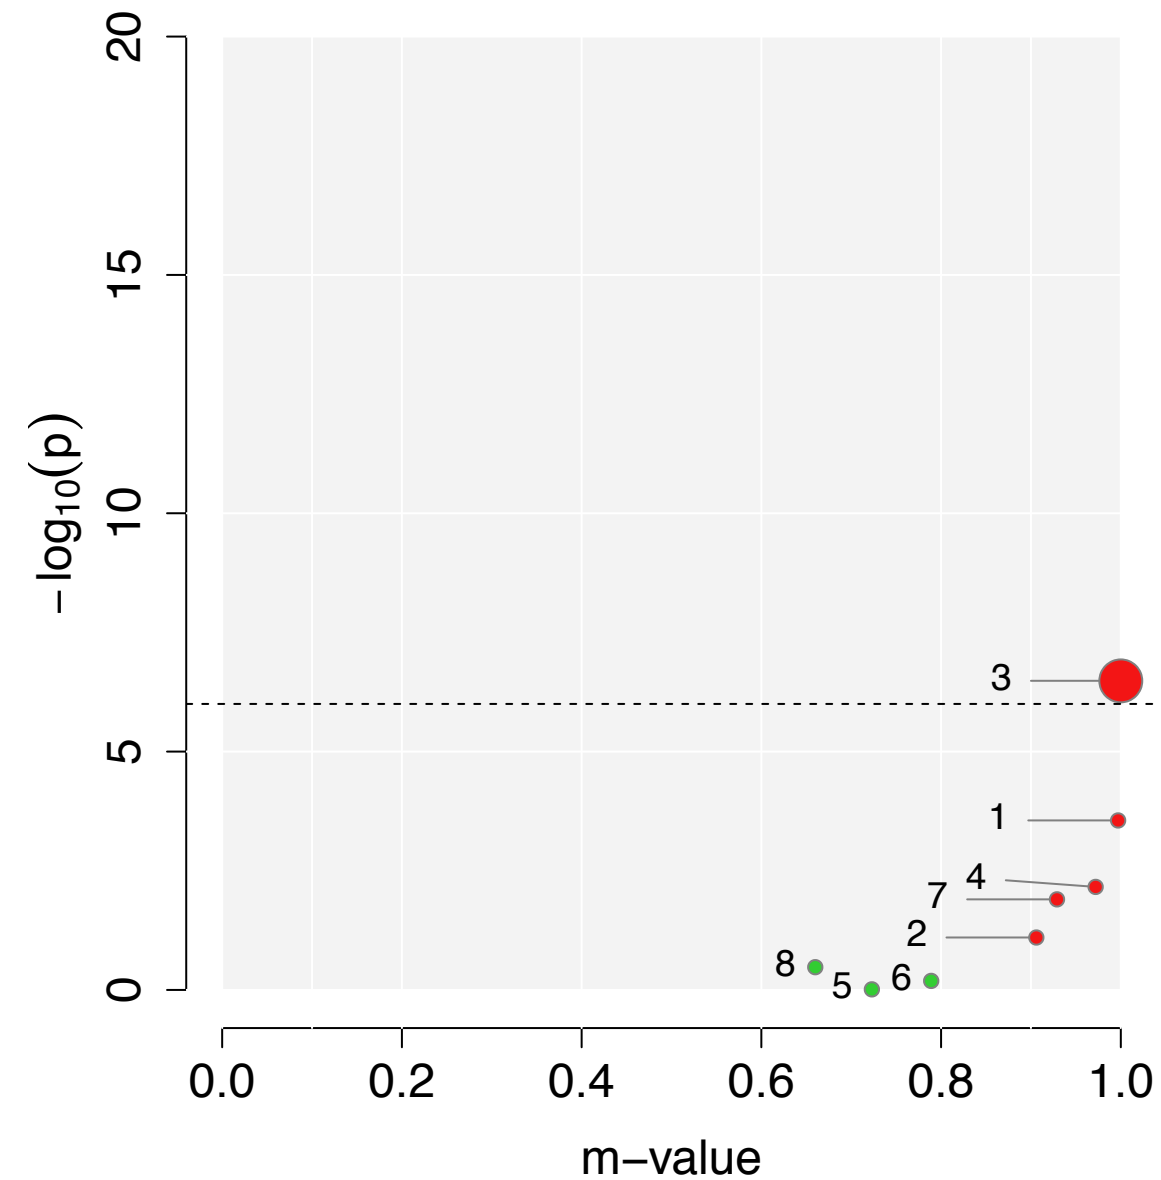



rs140505938 (Meta  $P = 2.42 \times 10^{-12}$ )

Gene : *VPS45*, *OTUD7B*

GWAS P-value

- 1.05 x 10<sup>-9</sup> ● 1.SCZ
- 7.00 x 10<sup>-7</sup> ● 2.BIP
- 0.0671 ● 3.MD
- 0.1240 ● 4.ASD
- 0.4839 ● 5.ADHD
- 0.5130 ● 6.TS
- 0.6462 ● 7.ANO
- 0.0053 ● 8.OCD

FE summary

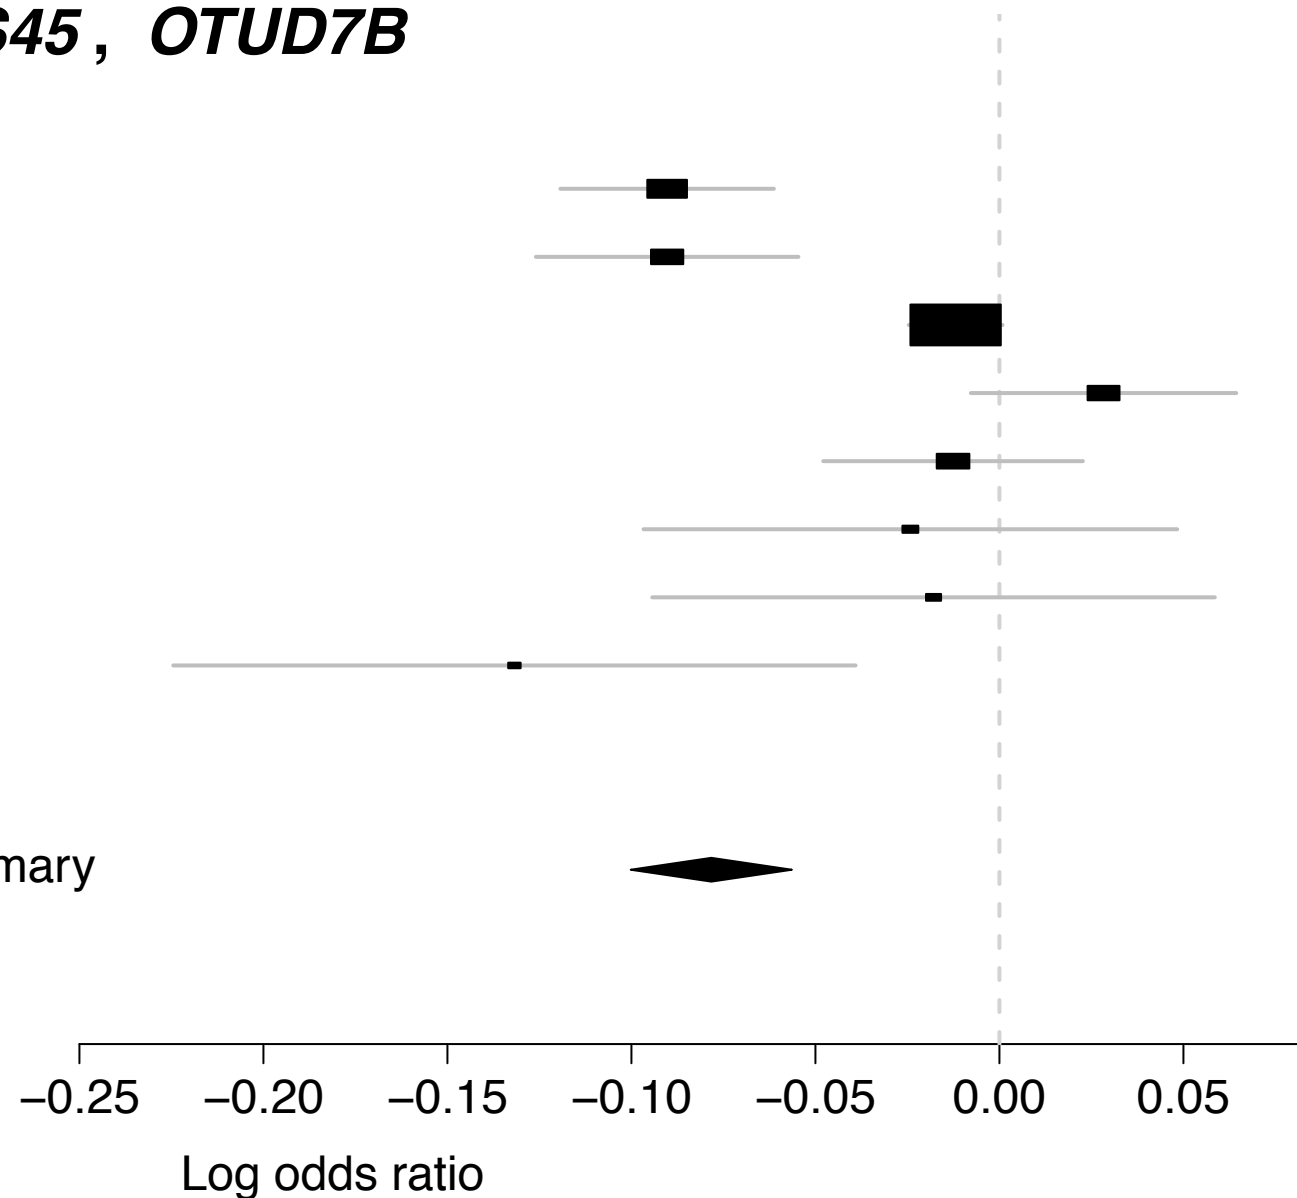

PM-Plot

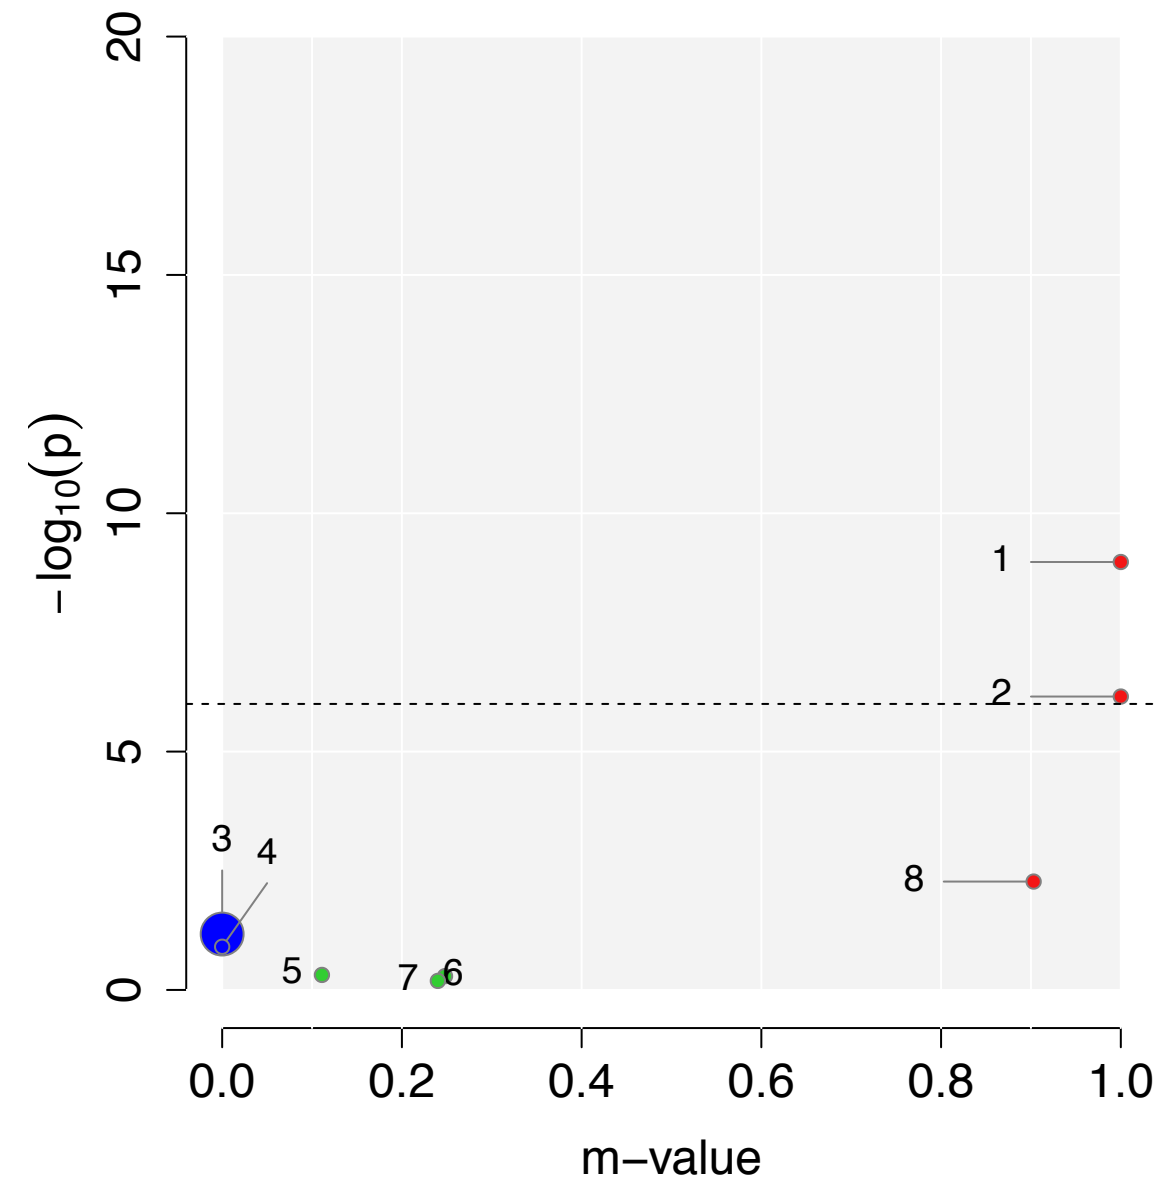

# rs142462188 (Meta $P = 9.68 \times 10^{-9}$ )

Gene : (>200kb)

## GWAS P-value

- $3.57 \times 10^{-5}$  ● 1.SCZ
- 0.0810 ● 2.BIP
- $1.20 \times 10^{-6}$  ● 3.MD
- 0.0321 ● 4.ASD
- 0.3491 ● 5.ADHD
- 0.3334 ● 6.TS
- 0.6775 ● 7.ANO
- 0.1257 ● 8.OCD

FE summary

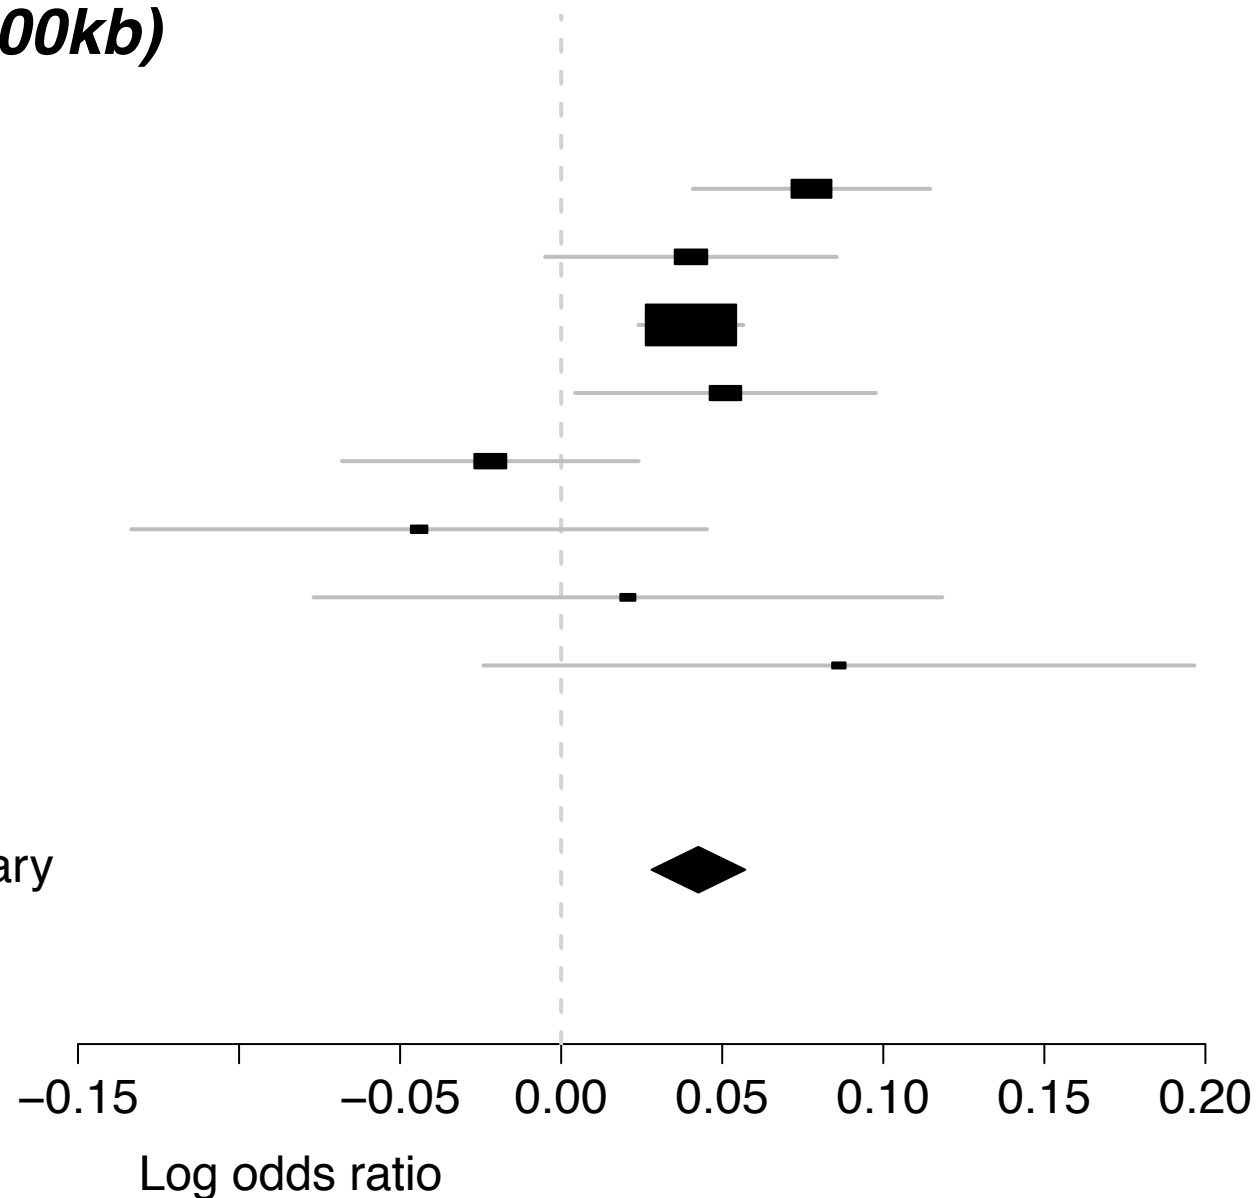

## PM-Plot

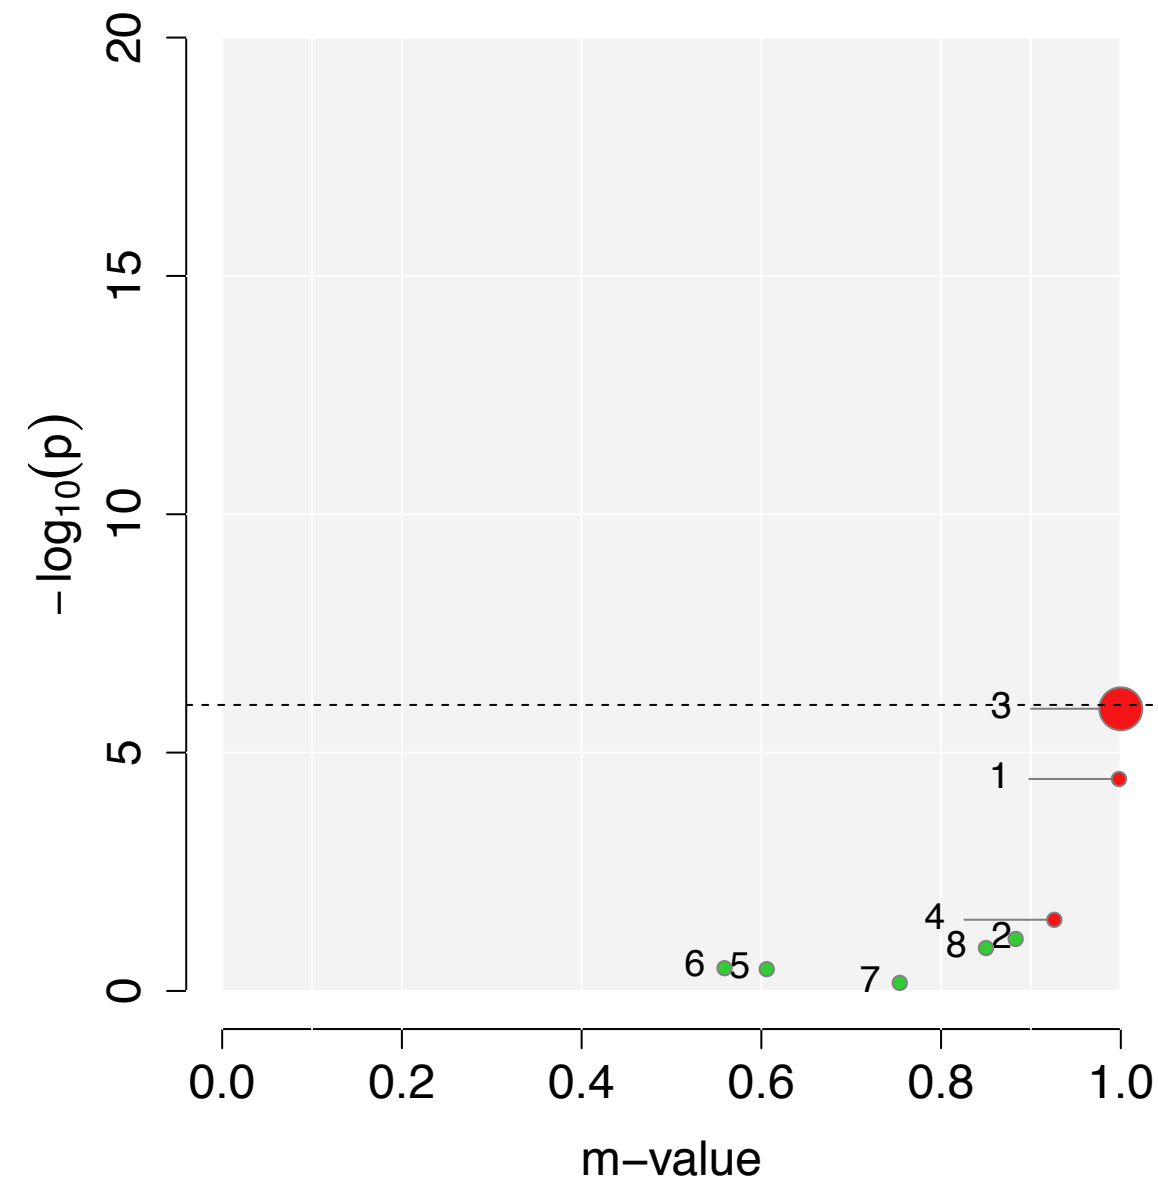

# rs144158419 (Meta $P = 6.89 \times 10^{-9}$ )

Gene : (>200kb)

## GWAS P-value

- 4.15 x 10<sup>-12</sup> ● 1.SCZ
- 0.4760 ● 2.BIP
- 0.1849 ● 3.MD
- 0.1067 ● 4.ASD
- 0.7315 ● 5.ADHD
- 0.1828 ● 6.TS
- 0.2911 ● 7.ANO
- 0.7835 ● 8.OCD

FE summary

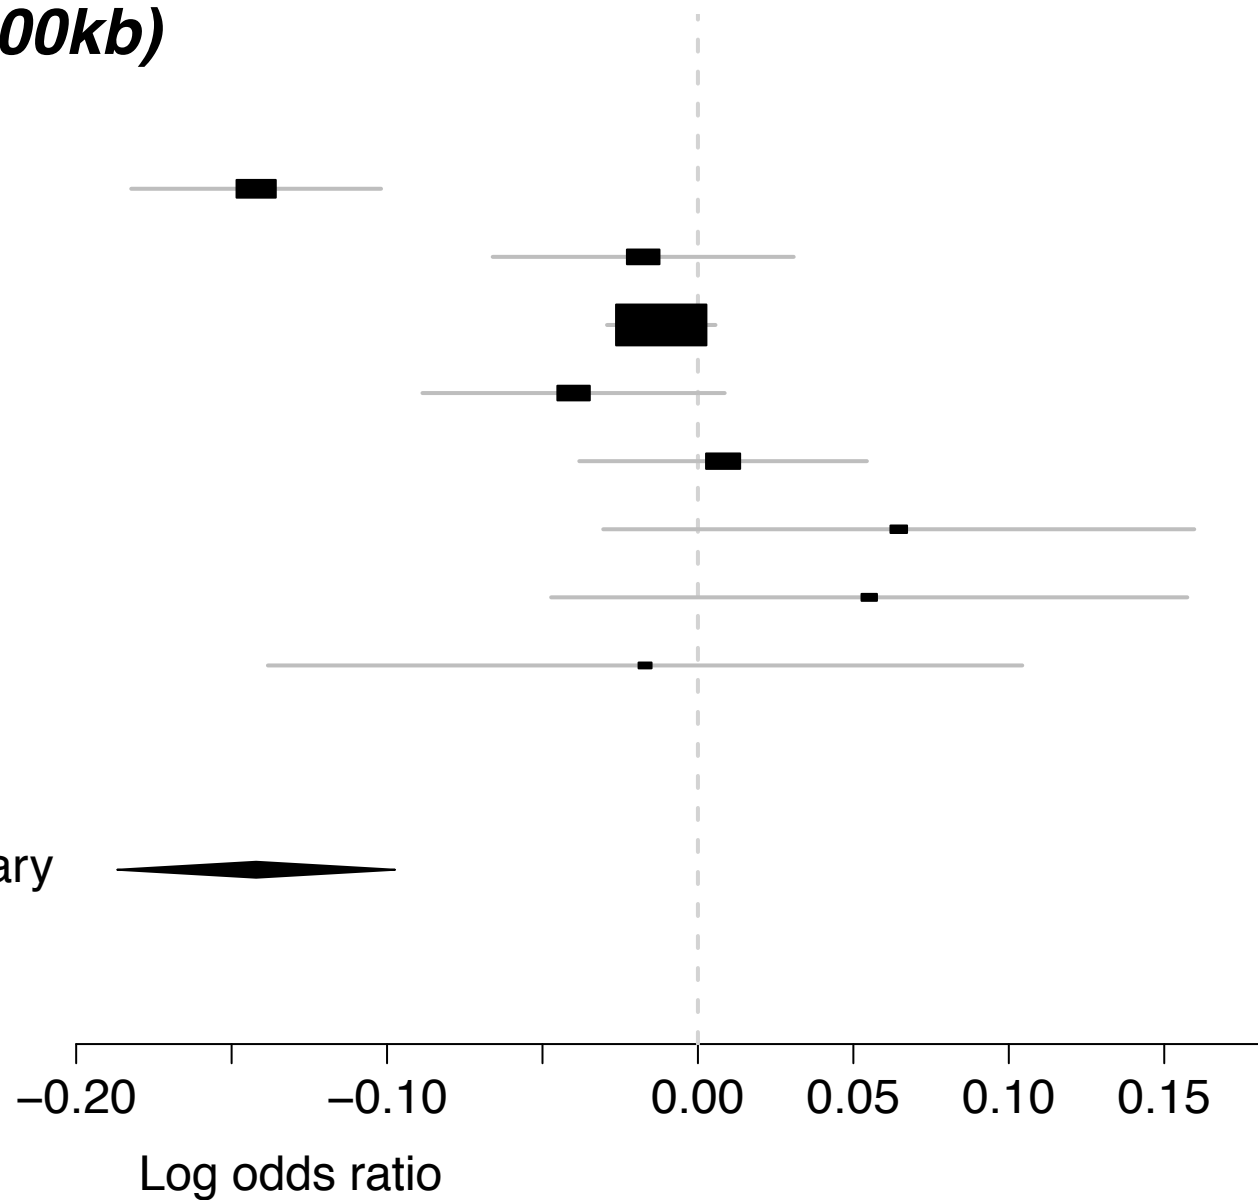

## PM-Plot

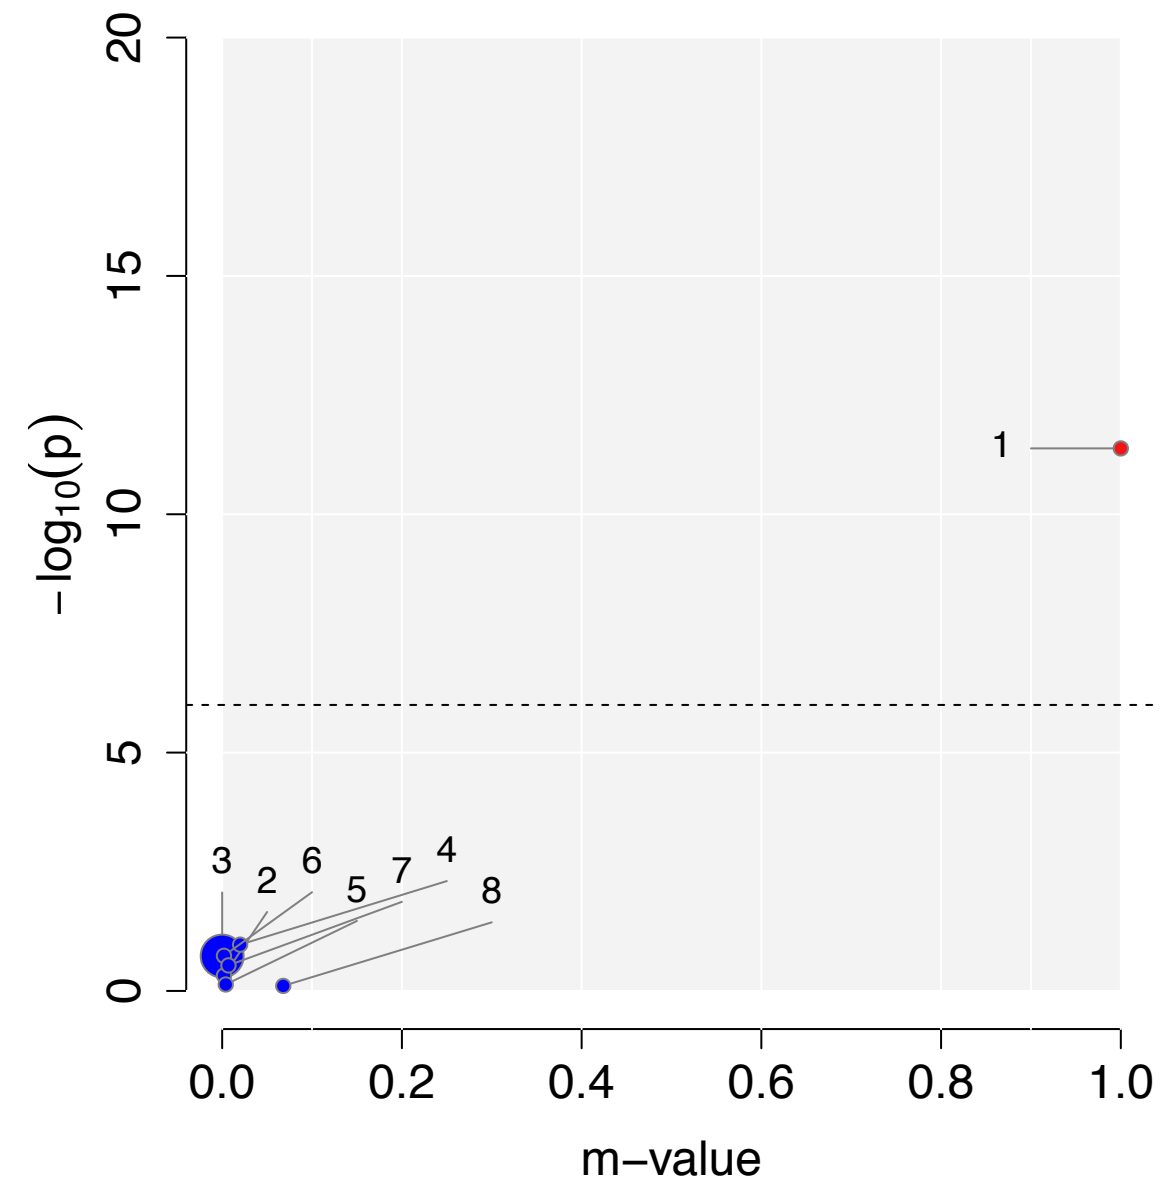

# rs188099135 (Meta $P = 3.05 \times 10^{-8}$ )

Gene : *EPHX2*, *CLU*

## GWAS P-value

- 5.93 x 10<sup>-8</sup> ● 1.SCZ
- 0.3781 ● 2.BIP
- 0.6727 ● 3.MD
- 0.0743 ● 4.ASD
- 0.0005 ● 5.ADHD
- 0.1925 ● 6.TS
- 0.7840 ● 7.ANO
- 0.4992 ● 8.OCD

FE summary

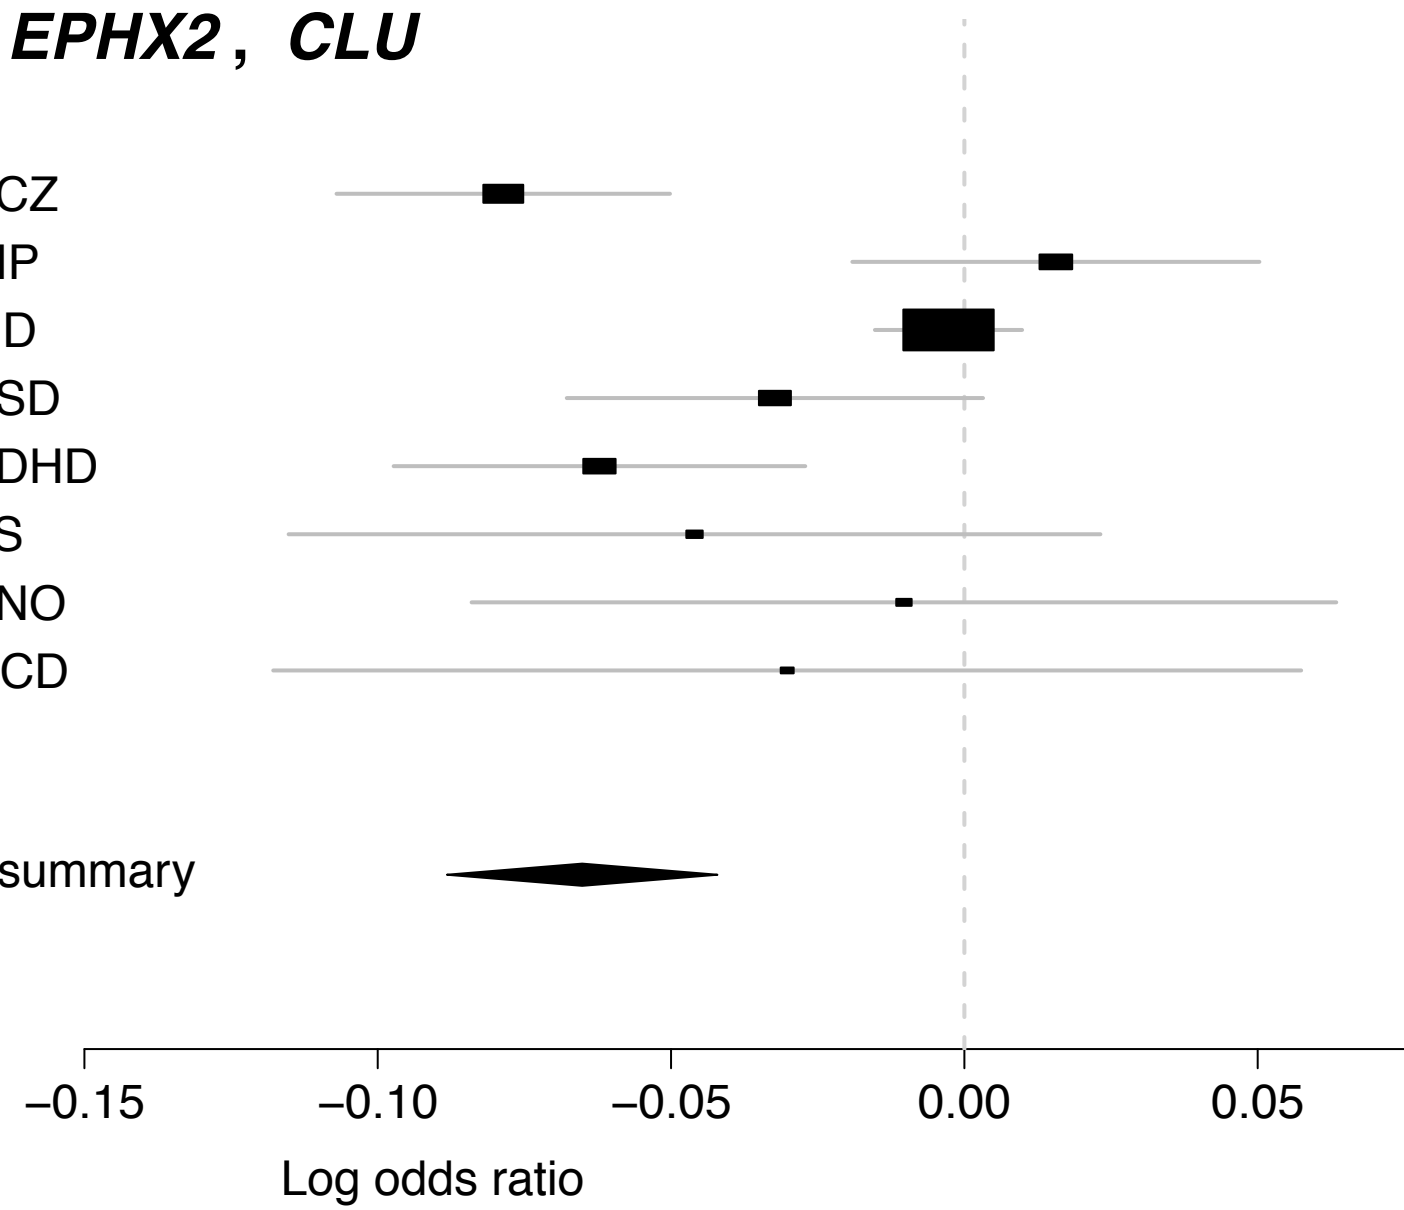

## PM-Plot

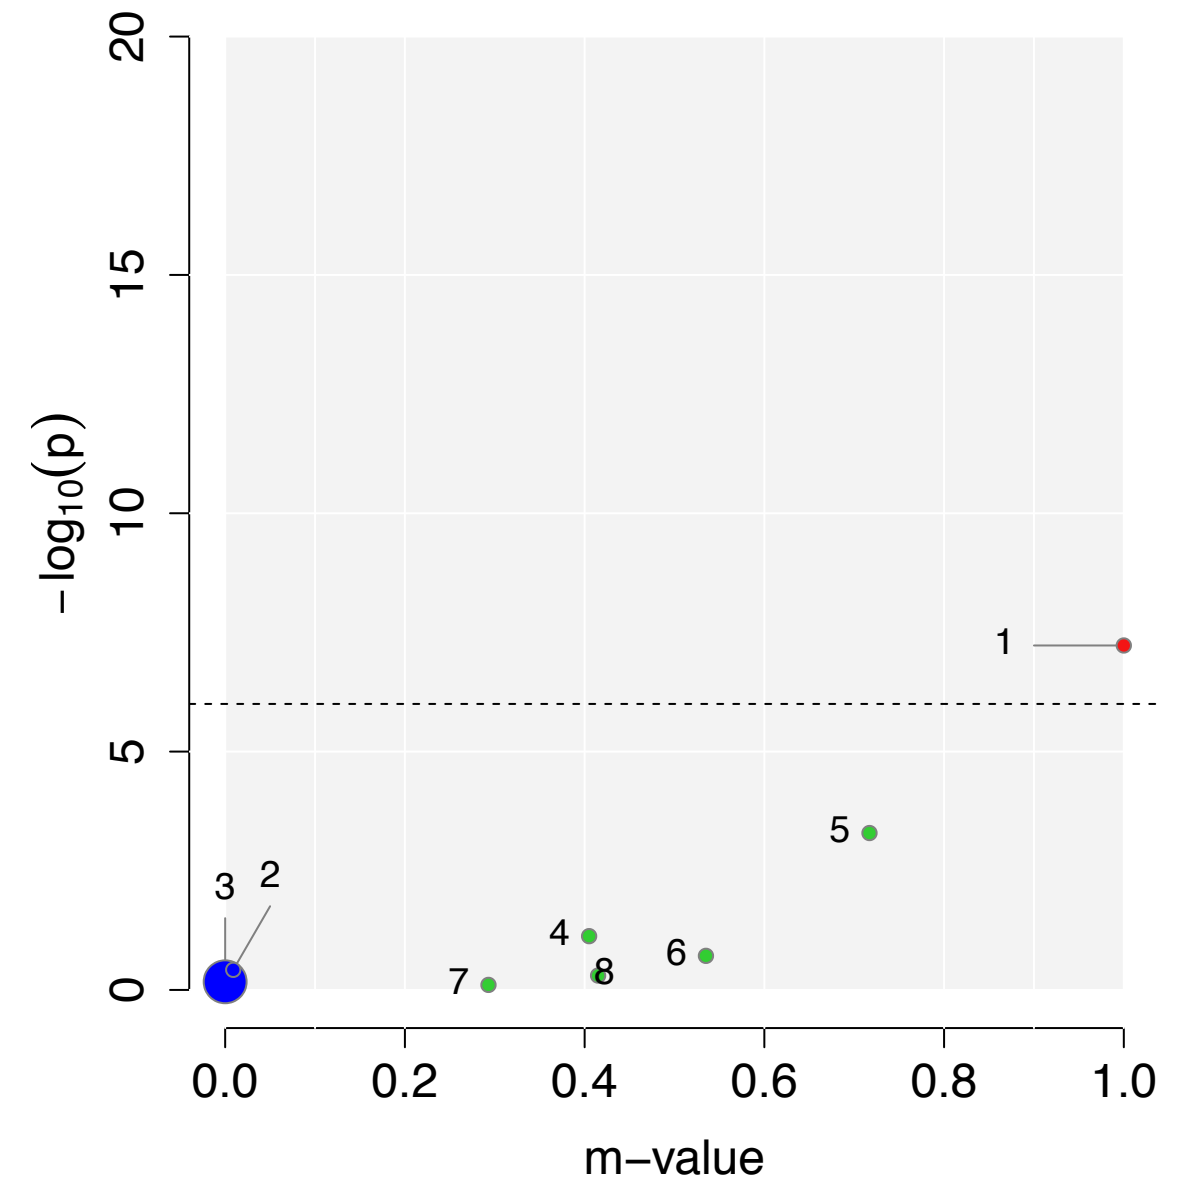

**Figure S3. Statistical power and number of cross-disorder associations (Related to Table S4).** Power to detect associations across pairs of disorders was plotted with the number of cross-disorder associations identified in the current meta-analysis. For each pair of disorders, power was estimated using the number of cases and heritability for each disorder, as well as the genetic correlation between the disorders. In general, as power increased, so did the number of SNPs identified.

# Statistical Power and Numbers of Cross-Disorder Associations

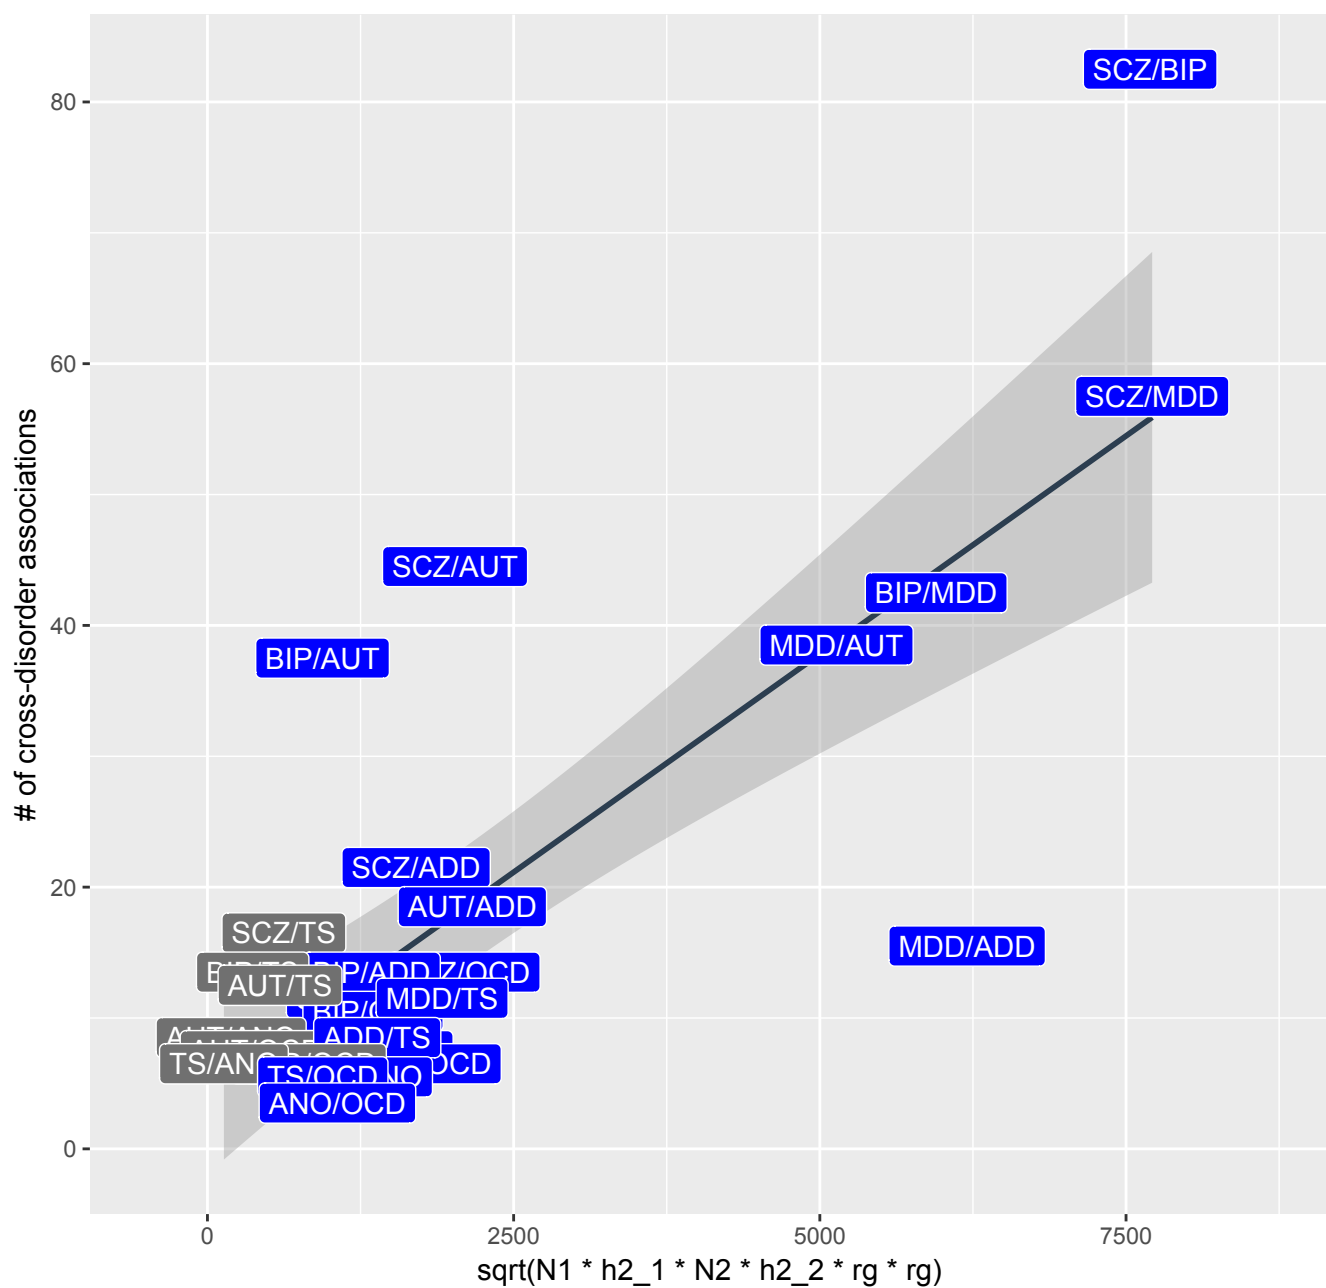

**Figure S4. Gene expression of top loci across development. (Related to Figure 3)**

Gene expression trajectories from a transcriptome atlas of post-mortem brain tissue across development are plotted for four top loci, *DCC*, *RBFOX1*, *NOX4* and *BRAF* in six different brain tissue types. AMY = amygdala; MD = mediodorsal nucleus of the thalamus; CBC = cerebellar cortex; NCX = neocortex; HIP = hippocampus; STR = striatum.

## DCC

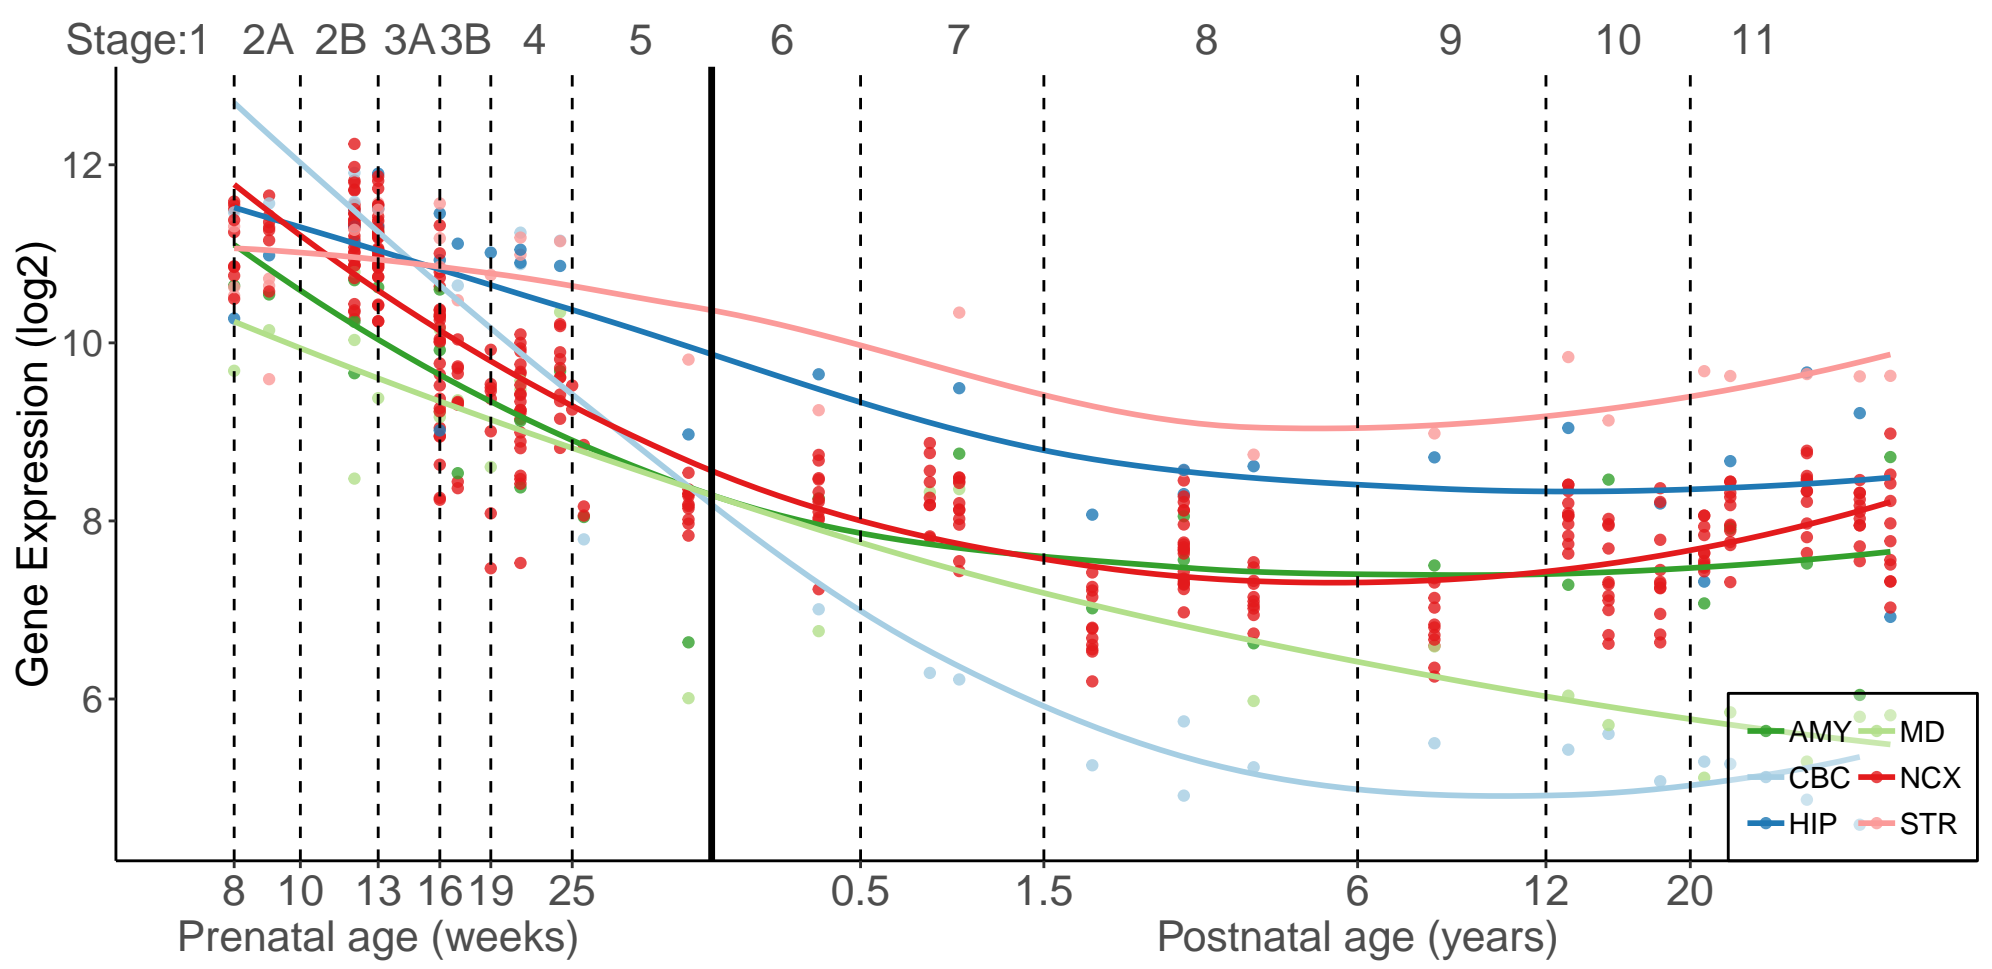

## RBFOX1

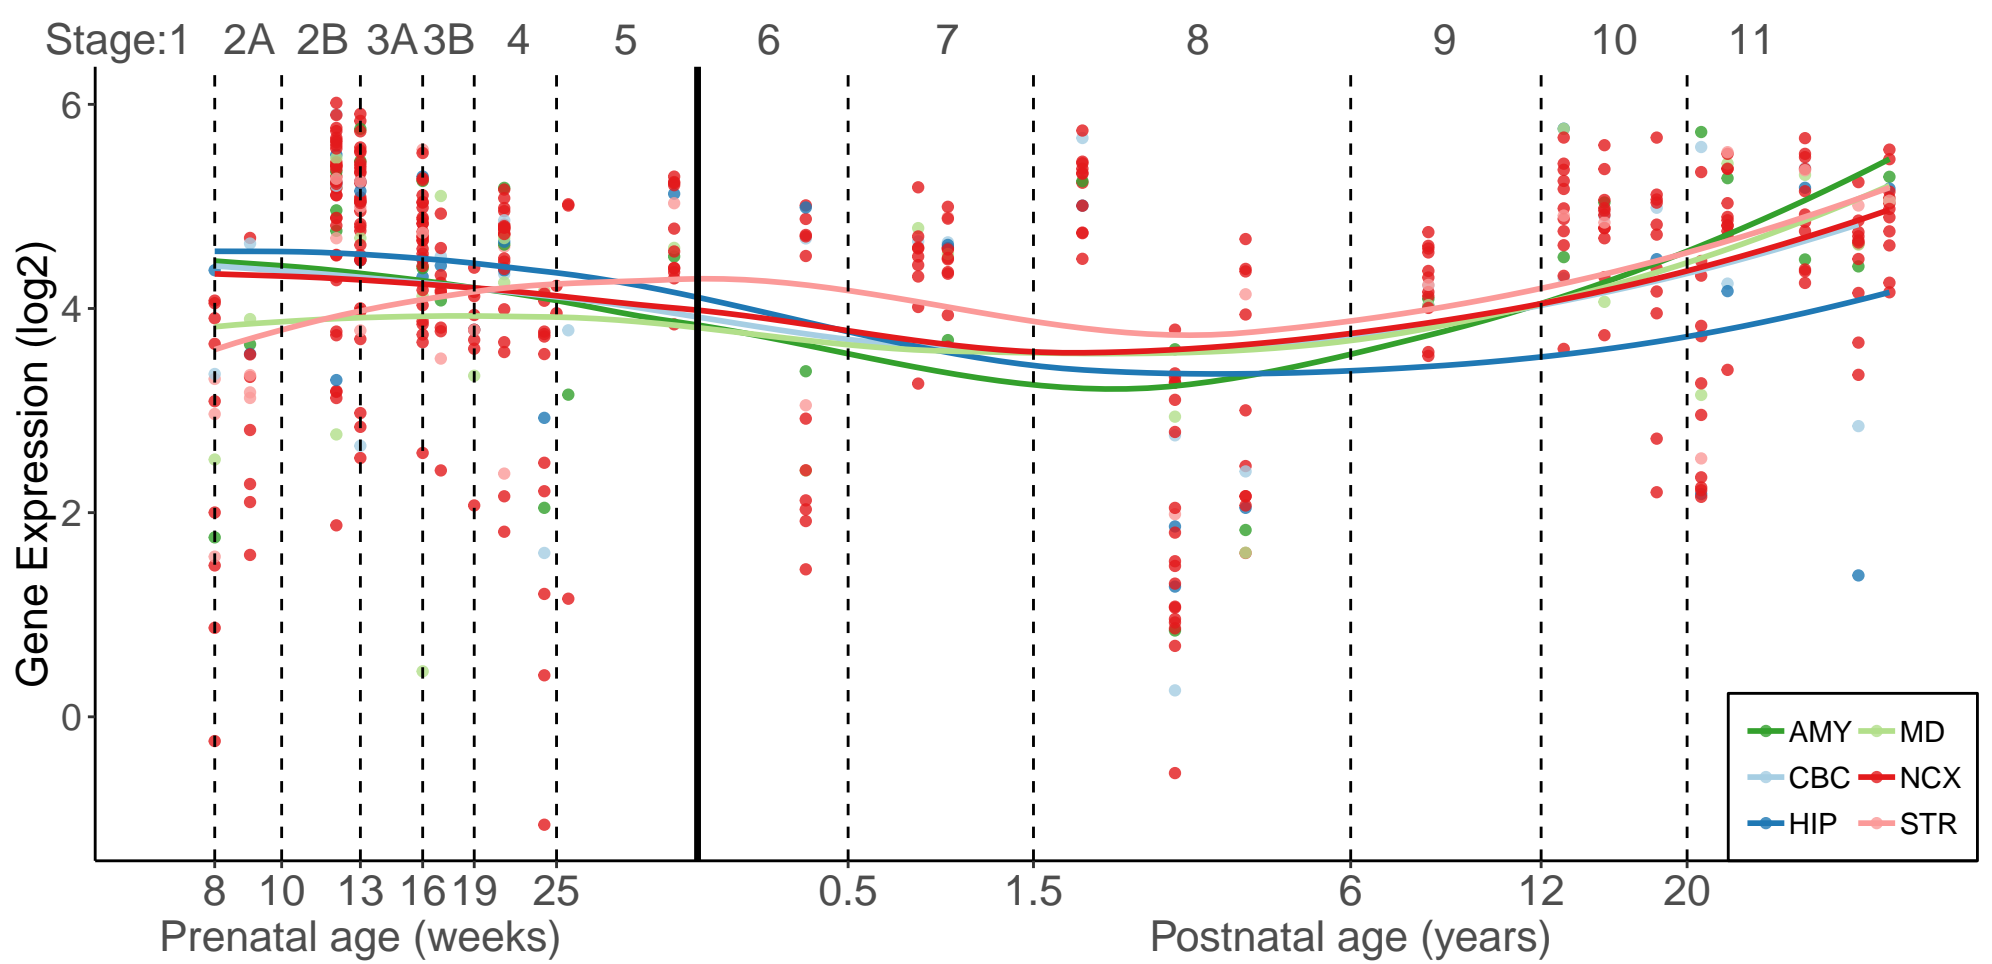

## NOX4

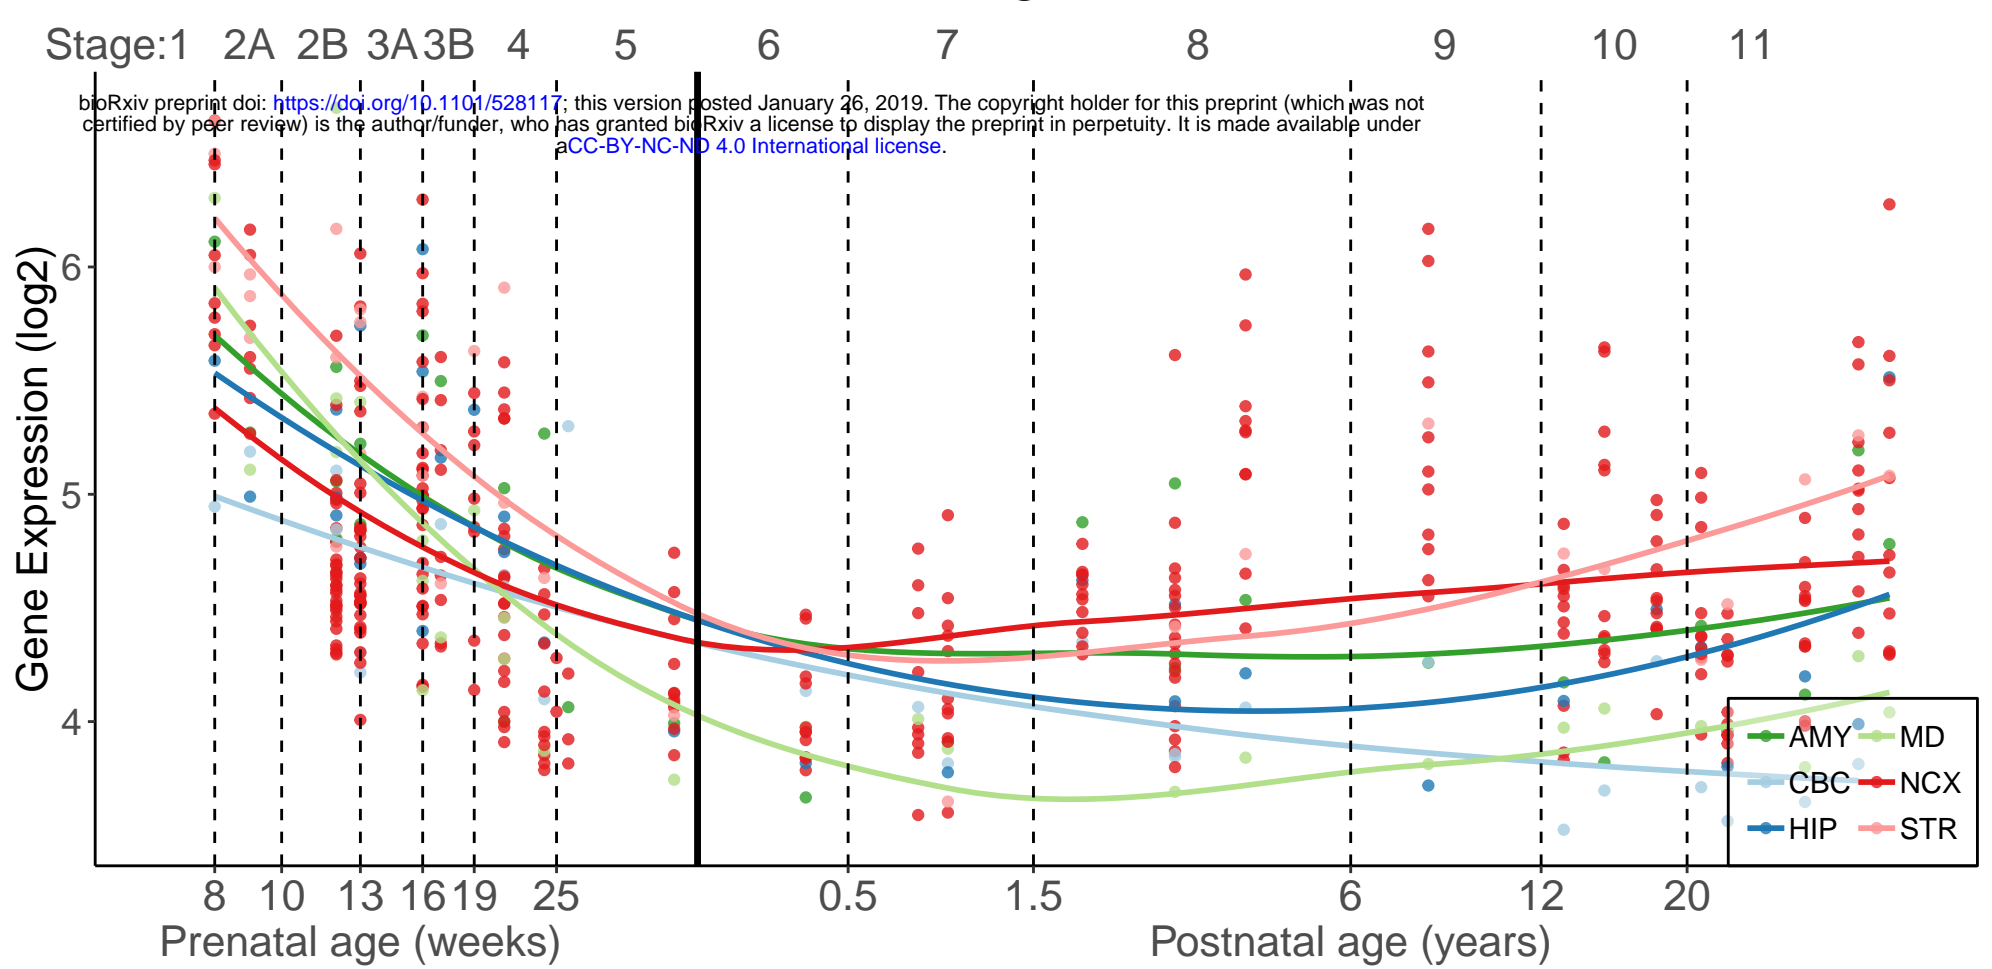

## BRAF

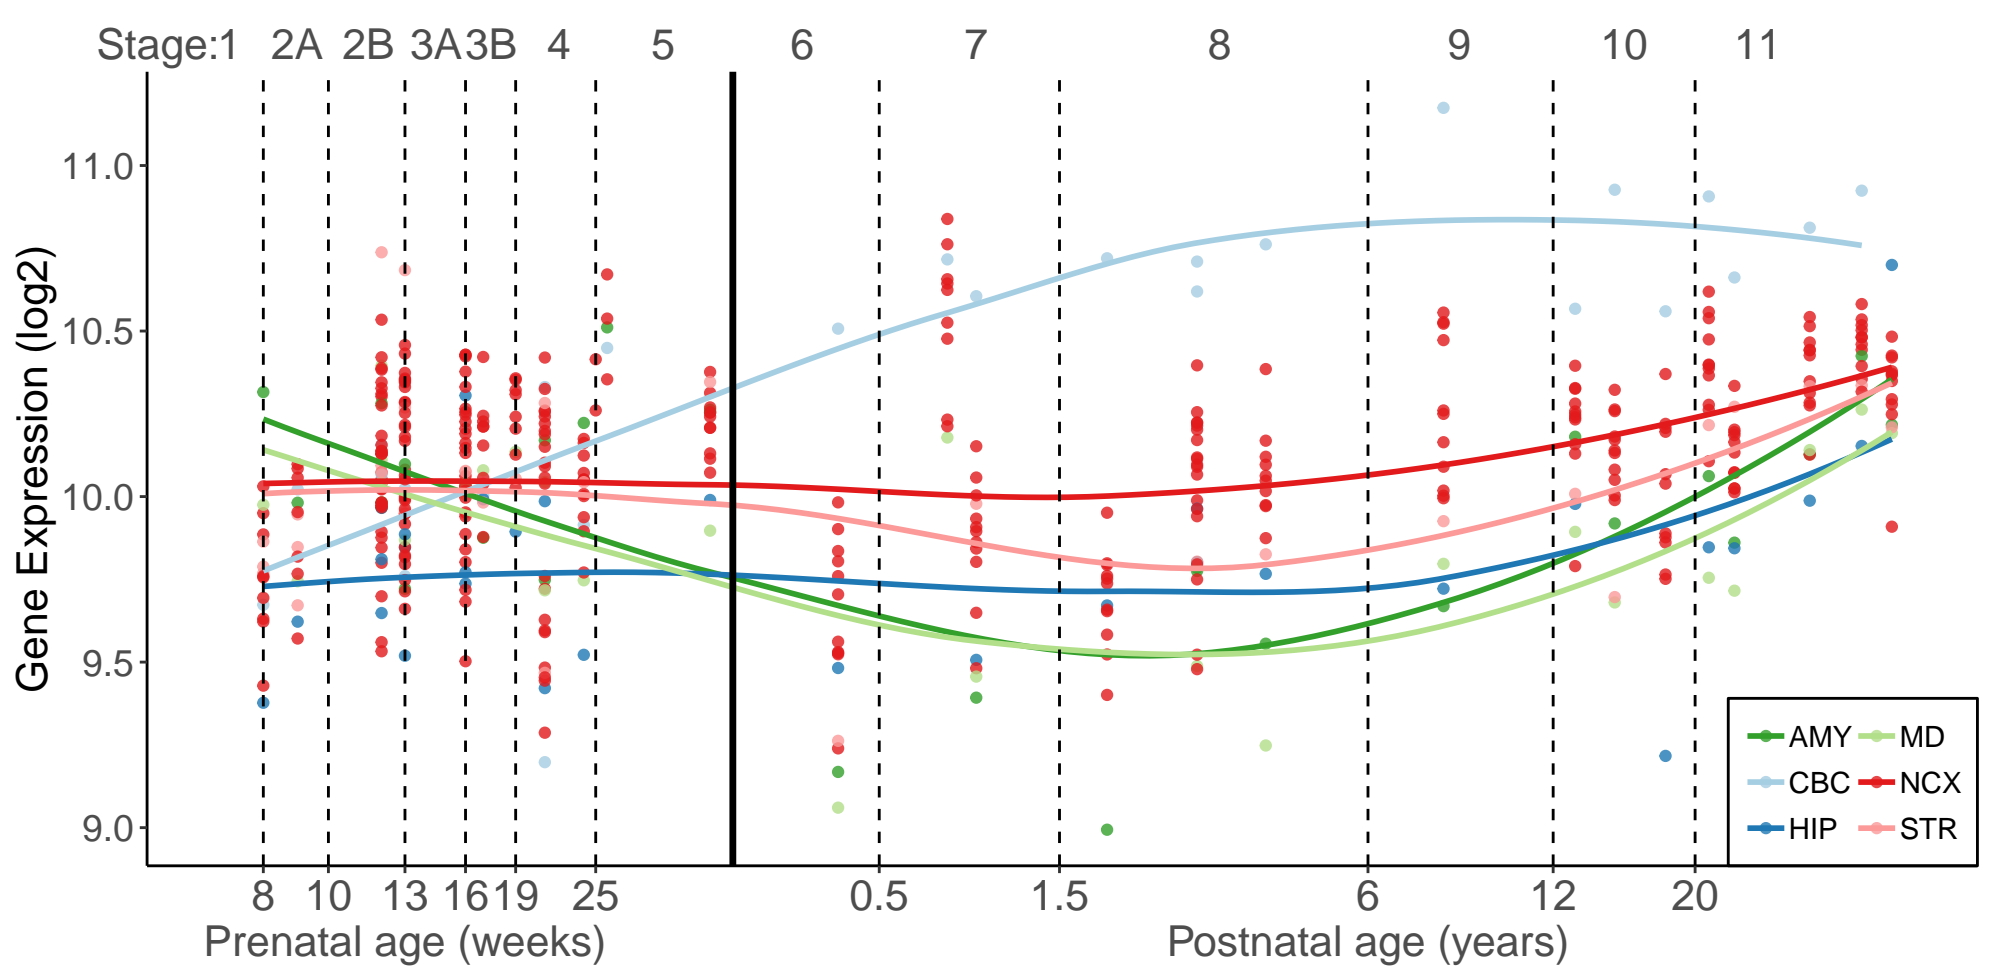

bioRxiv preprint doi: <https://doi.org/10.1101/528117>; this version posted January 26, 2019. The copyright holder for this preprint (which was not certified by peer review) is the author/funder, who has granted bioRxiv a license to display the preprint in perpetuity. It is made available under aCC-BY-NC-ND 4.0 International license.



**Figure S5. Gene expression in the brain for pleiotropic and non-pleiotropic loci.** (Related to Figure 5) Average normalized gene expression in fetal and adult post-mortem brain tissue for pleiotropic (109) and non-pleiotropic (37) loci were plotted. Disorder-specific and pleiotropic risk loci showed a similar level of gene expression in prenatal and postnatal development after multiple testing correction (t-test  $p > 0.025$ ).

# Brain Expression

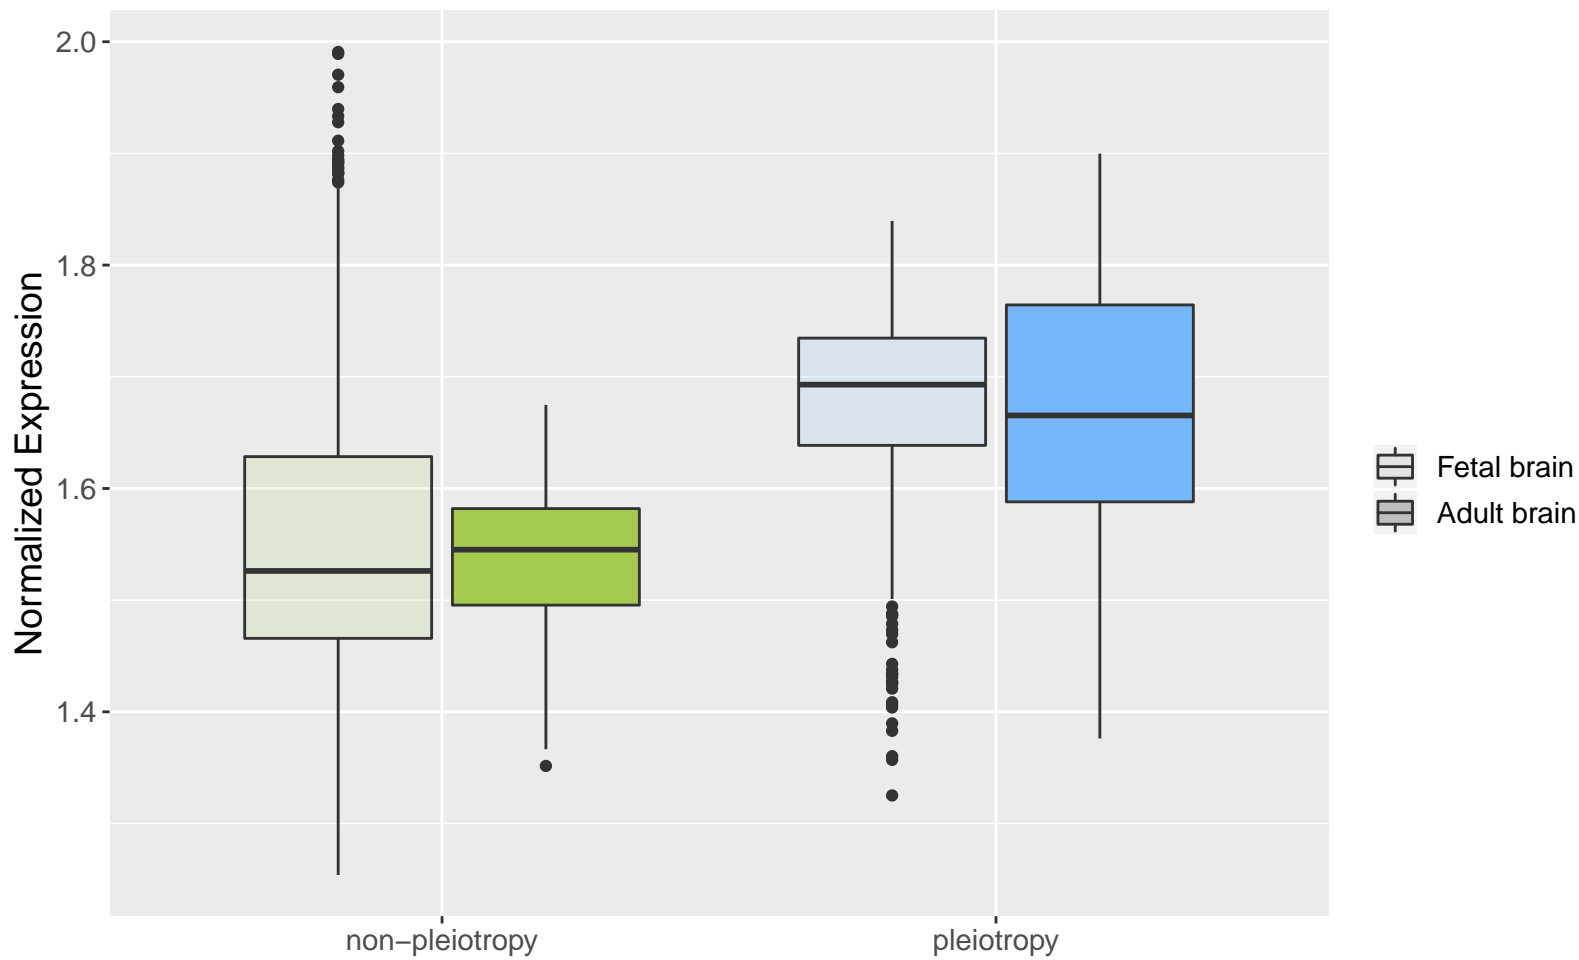

Source: http://biorxiv.org/content/10.1101/528117v1.full.pdf
